# Supplementary material for: PTEN restrains SHH medulloblastoma growth through cell autonomous and nonautonomous mechanisms
Source: eLife. 2026 Apr 17;14:RP108190. doi: 10.7554/eLife.108190 (PMC13090030; doi:10.7554/eLife.108190)
Supplement: Figure 8—figure supplement 2—source data 1. — Related to Figure 8—figure supplement 2D and E. [file elife-108190-fig8-figsupp2-data1.xlsx]

## Sheet: Figure 8-Supp 2-source data 1
Figure 8-Supplement 2-Source data 1. Top cell markers for each cluster in merged scRNA-seq data. Related to Figure 8-Supplement 2D, E.
gene	p_val	avg_log2FC	pct.1	pct.2	p_val_adj	cluster
Meg3	0	2.54523	0.957	0.464	0	0
Grm4	0	2.91727	0.708	0.219	0	0
Scn2a	0	2.82385	0.746	0.272	0	0
Adcy1	0	2.62877	0.788	0.325	0	0
Syne1	0	2.83513	0.794	0.335	0	0
Nrxn3	0	2.51592	0.772	0.321	0	0
Slc17a7	0	2.61939	0.673	0.227	0	0
Tenm1	0	2.55857	0.723	0.287	0	0
Cbln3	0	2.61184	0.627	0.203	0	0
Gabra6	0	2.68622	0.622	0.203	0	0
Rnf112	0	3.00828	0.567	0.178	0	0
Syt1	0	2.12108	0.723	0.342	0	0
Unc13c	0	2.79815	0.548	0.189	0	0
Fat2	0	2.31425	0.643	0.284	0	0
Grin2c	0	3.21932	0.458	0.129	0	0
Kcnc1	0	2.4107	0.678	0.367	0	0
Syt4	0	1.84223	0.594	0.284	0	0
Chgb	0	2.25991	0.85	0.544	0	0
Gabrd	0	2.5315	0.488	0.183	0	0
Etv1	0	2.1551	0.612	0.309	0	0
Hbb-bs	0	2.79548	0.527	0.231	0	0
Cacna1a	0	2.52036	0.782	0.486	0	0
Dnm1	0	2.1023	0.51	0.225	0	0
Cacna1e	0	2.26667	0.552	0.271	0	0
Syt2	0	2.82876	0.436	0.163	0	0
Scn1b	0	1.85312	0.475	0.202	0	0
Slc12a5	0	2.72356	0.426	0.154	0	0
Igsf9b	0	2.65425	0.47	0.2	0	0
Rian	0	2.68081	0.449	0.184	0	0
Dpp6	0	2.49255	0.465	0.202	0	0
Grin2a	0	2.67957	0.409	0.151	0	0
Atp1b1	0	1.78526	0.545	0.293	0	0
Cbln1	0	2.04908	0.61	0.359	0	0
Trhde	0	2.59908	0.423	0.175	0	0
Cdr1os	0	1.43274	0.475	0.227	0	0
Nrxn2	0	2.00242	0.677	0.434	0	0
Grin1	0	2.47073	0.429	0.19	0	0
Kcnt1	0	3.19241	0.338	0.102	0	0
Chl1	0	2.23739	0.435	0.202	0	0
Pclo	0	2.06595	0.707	0.477	0	0
Sorl1	0	2.56221	0.405	0.177	0	0
Ablim1	0	2.53235	0.41	0.182	0	0
Atp2b2	0	2.25293	0.725	0.504	0	0
Unc80	0	2.82616	0.38	0.16	0	0
Adam11	0	2.618	0.376	0.156	0	0
Atp1a1	0	2.60153	0.892	0.673	0	0
Nptx1	0	2.56526	0.407	0.188	0	0
Gabra1	0	2.40025	0.364	0.147	0	0
Ralyl	0	2.53097	0.377	0.165	0	0
Ryr2	0	2.18748	0.433	0.224	0	0
Cadm3	0	2.03301	0.674	0.472	0	0
Olfm3	0	2.66266	0.331	0.13	0	0
Lrrtm3	0	2.22429	0.417	0.218	0	0
Wscd2	0	2.61982	0.384	0.186	0	0
Camkk2	0	2.26733	0.422	0.226	0	0
Atp1a3	0	1.90467	0.495	0.301	0	0
Gm16183	0	2.6691	0.327	0.138	0	0
Faim2	0	2.71423	0.307	0.118	0	0
Tmem108	0	2.50032	0.365	0.177	0	0
Trpm3	0	2.2804	0.351	0.163	0	0
Gm42912	0	2.09208	0.353	0.166	0	0
Snhg14	0	2.48115	0.528	0.349	0	0
Kndc1	0	3.09461	0.267	0.089	0	0
Snhg11	0	2.9037	0.252	0.075	0	0
Kcna1	0	2.24765	0.351	0.178	0	0
Atp2b3	0	2.62457	0.29	0.117	0	0
Gabrb2	0	2.73254	0.265	0.099	0	0
Fnbp1	0	2.28394	0.457	0.293	0	0
Tspan9	0	2.69431	0.296	0.133	0	0
Cadps2	0	1.66374	0.518	0.358	0	0
Mir124a-1hg	0	1.94503	0.634	0.488	0	0
Nrxn1	0	1.6574	0.909	0.769	0	0
Tmem132a	0	1.94832	0.648	0.516	0	0
Snrnp70	0	1.25943	0.681	0.812	0	0
App	0	1.21629	0.721	0.835	0	0
Son	0	1.10397	0.795	0.904	0	0
Gpm6a	0	1.40424	0.853	0.746	0	0
Aplp2	0	1.84686	0.815	0.751	0	0
mt-Nd1	0	0.845381	0.92	0.964	0	0
Gria2	0	1.05214	0.751	0.787	0	0
mt-Nd4l	0	1.30886	0.893	0.921	0	0
mt-Nd2	0	0.958849	0.952	0.972	0	0
mt-Nd4	0	0.880873	0.972	0.983	0	0
Ank2	0	1.15952	0.707	0.717	0	0
Malat1	0	1.67944	1	0.998	0	0
mt-Co3	0	0.625427	0.993	0.995	0	0
mt-Co1	0	0.594558	0.994	0.995	0	0
mt-Atp6	0	0.517658	0.997	0.998	0	0
mt-Co2	0	0.404138	0.995	0.995	0	0
mt-Cytb	0	0.705126	0.995	0.995	0	0
Car4	4.02825e-306	2.28908	0.295	0.129	8.60676e-302	0
Pcdh9	3.93385e-303	2.06622	0.4	0.233	8.40506e-299	0
Kcnd2	1.39143e-298	2.20834	0.352	0.185	2.97292e-294	0
Dlgap1	9.36933e-298	1.77513	0.508	0.381	2.00185e-293	0
Eno2	2.58827e-297	1.94989	0.355	0.181	5.53009e-293	0
Tspan7	1.40978e-293	1.87657	0.445	0.29	3.01213e-289	0
Rims2	5.1377e-291	2.02122	0.523	0.438	1.09772e-286	0
Gm42418	3.83445e-282	0.47769	0.972	0.986	8.19269e-278	0
Spock2	9.80336e-273	1.51815	0.434	0.273	2.09459e-268	0
Srcin1	9.0968e-272	1.81292	0.506	0.406	1.94362e-267	0
Ank1	1.04728e-270	2.62789	0.297	0.145	2.23763e-266	0
Sirpa	6.75308e-266	2.18829	0.333	0.176	1.44286e-261	0
Megf11	1.49448e-263	2.64387	0.264	0.118	3.19311e-259	0
Camk2b	1.87879e-262	1.96731	0.4	0.249	4.01421e-258	0
Atp1b2	3.24094e-262	1.33339	0.447	0.292	6.9246e-258	0
Prune2	6.95863e-255	2.33123	0.312	0.162	1.48678e-250	0
Plch2	2.43944e-254	2.64166	0.271	0.127	5.21211e-250	0
Atp2b1	8.80261e-252	0.995631	0.693	0.775	1.88077e-247	0
Ntm	4.0382e-250	1.16917	0.55	0.426	8.62801e-246	0
Ppfia4	5.66324e-250	2.45508	0.277	0.132	1.21001e-245	0
Asph	6.41548e-250	1.94876	0.477	0.378	1.37073e-245	0
Car10	1.69389e-245	1.88811	0.374	0.226	3.61916e-241	0
Pde10a	3.20603e-244	2.02127	0.39	0.246	6.84999e-240	0
Arpp21	1.43447e-242	1.32815	0.535	0.432	3.0649e-238	0
Negr1	1.28973e-241	1.98127	0.453	0.343	2.75564e-237	0
Cul5	3.20967e-241	0.253041	0.142	0.444	6.85778e-237	0
Snap25	1.27382e-240	0.778825	0.67	0.584	2.72165e-236	0
Atp2a2	5.60556e-237	1.50579	0.601	0.659	1.19768e-232	0
Cul1	7.49701e-237	0.277528	0.166	0.487	1.60181e-232	0
Rnf20	8.26261e-235	0.265778	0.113	0.384	1.76539e-230	0
Cacna1d	8.27898e-230	2.40003	0.303	0.162	1.76889e-225	0
Tmem59l	1.097e-229	2.24314	0.273	0.134	2.34385e-225	0
March7	1.87331e-228	0.326101	0.135	0.421	4.00251e-224	0
Kcnc3	5.71313e-228	1.78323	0.533	0.509	1.22067e-223	0
Ehmt1	3.98991e-227	0.262612	0.158	0.463	8.52483e-223	0
Nae1	3.76244e-225	0.258225	0.201	0.547	8.03883e-221	0
Srek1	6.77575e-223	0.26798	0.189	0.522	1.44771e-218	0
Ppm1a	2.27597e-222	0.271748	0.157	0.459	4.86285e-218	0
Rbm4	8.66221e-222	0.25603	0.12	0.387	1.85077e-217	0
Wac	9.24923e-222	0.299347	0.178	0.501	1.97619e-217	0
Knop1	2.08043e-220	0.325454	0.122	0.392	4.44504e-216	0
Ppp2r5c	3.59176e-218	0.288858	0.102	0.351	7.67416e-214	0
Npepps	5.09429e-218	0.297148	0.14	0.423	1.08844e-213	0
Kif1b	5.50283e-218	1.08753	0.671	0.809	1.17573e-213	0
Larp4	1.83726e-216	0.297399	0.108	0.361	3.92549e-212	0
Mycbp2	2.54213e-216	1.44215	0.6	0.669	5.43152e-212	0
Gapvd1	4.36338e-216	0.317239	0.149	0.439	9.3228e-212	0
Mrps5	2.4015e-214	0.400567	0.159	0.459	5.13104e-210	0
Prrc2b	1.01161e-213	0.304713	0.192	0.519	2.1614e-209	0
Mphosph8	1.5432e-213	0.304613	0.174	0.485	3.29721e-209	0
Crebbp	1.1648e-212	0.336477	0.168	0.473	2.48871e-208	0
Tnpo3	3.57567e-212	0.269541	0.092	0.328	7.63977e-208	0
Tmem208	2.65496e-211	0.279363	0.189	0.512	5.67259e-207	0
Sv2a	2.96718e-210	1.83978	0.401	0.28	6.33968e-206	0
Brd1	3.15765e-210	0.332151	0.196	0.527	6.74664e-206	0
Gpr158	1.09938e-209	2.41852	0.275	0.144	2.34894e-205	0
Nipbl	2.9879e-209	0.362947	0.185	0.504	6.38396e-205	0
Rims1	2.72169e-208	1.91467	0.383	0.258	5.81517e-204	0
Esf1	8.32511e-208	0.380207	0.157	0.449	1.77874e-203	0
Srrm3	1.86969e-207	2.17067	0.383	0.265	3.99479e-203	0
Taf15	4.83078e-207	0.254336	0.197	0.527	1.03214e-202	0
Rbm10	6.84526e-207	0.259445	0.077	0.295	1.46256e-202	0
Ppp1r12a	3.41593e-206	0.353059	0.145	0.424	7.29848e-202	0
Nptn	9.64993e-206	1.80443	0.504	0.463	2.0618e-201	0
Ndfip2	3.43603e-205	0.293975	0.156	0.443	7.34142e-201	0
Mafg	1.40408e-204	0.313667	0.101	0.339	2.99996e-200	0
Sltm	2.0611e-204	0.29215	0.222	0.572	4.40374e-200	0
Atp6v0b	1.0621e-202	1.00467	0.678	0.839	2.26928e-198	0
Ntrk3	1.95359e-202	1.96147	0.435	0.343	4.17404e-198	0
Oga	4.11762e-202	0.324373	0.139	0.408	8.7977e-198	0
Noc2l	2.88102e-201	0.260271	0.075	0.29	6.15559e-197	0
Eif4g3	3.27781e-201	0.380234	0.185	0.498	7.00336e-197	0
Rps6kb1	3.49874e-201	0.393484	0.109	0.353	7.4754e-197	0
Cdk11b	7.54807e-201	0.3743	0.164	0.456	1.61272e-196	0
Ggnbp2	2.66886e-200	0.399785	0.126	0.382	5.70229e-196	0
Wdr82	4.17483e-200	0.356686	0.112	0.357	8.91995e-196	0
AC149090.1	1.76839e-199	2.1375	0.402	0.296	3.77834e-195	0
Csnk1g3	4.25542e-199	0.309865	0.139	0.406	9.09213e-195	0
Sez6l2	1.21213e-198	1.80834	0.425	0.324	2.58984e-194	0
Mier1	1.3543e-198	0.264196	0.104	0.339	2.8936e-194	0
Ldb1	1.84738e-198	0.251099	0.095	0.323	3.94711e-194	0
Prpf8	2.15571e-198	0.320898	0.115	0.361	4.6059e-194	0
Iws1	2.52708e-198	0.407492	0.119	0.37	5.39937e-194	0
Unc50	8.35139e-198	0.266257	0.116	0.362	1.78436e-193	0
Btbd7	1.36015e-197	0.288942	0.103	0.338	2.9061e-193	0
Yme1l1	1.44145e-196	0.35942	0.143	0.413	3.0798e-192	0
Appl2	4.41587e-196	2.67264	0.301	0.177	9.43494e-192	0
Ptpa	4.37835e-195	0.309497	0.094	0.319	9.35478e-191	0
Fermt2	6.57286e-195	0.313695	0.129	0.384	1.40436e-190	0
Nrbp1	1.5906e-194	0.263364	0.084	0.3	3.39847e-190	0
Pnpla8	2.59934e-194	0.339452	0.133	0.392	5.55375e-190	0
Strn3	2.81411e-194	0.38594	0.16	0.443	6.01264e-190	0
Kcna2	3.85084e-194	2.30289	0.259	0.133	8.22771e-190	0
Zfp644	1.67593e-193	0.294417	0.238	0.597	3.58079e-189	0
Mcf2l	1.79872e-193	2.31769	0.33	0.208	3.84315e-189	0
Arid2	1.86524e-193	0.379656	0.136	0.397	3.98526e-189	0
Atp6v1h	1.00656e-192	0.25161	0.125	0.375	2.15062e-188	0
Lman1	4.79251e-192	0.276327	0.181	0.483	1.02397e-187	0
Selenom	7.3468e-192	0.958929	0.589	0.497	1.56972e-187	0
Mecp2	1.03499e-191	0.341775	0.119	0.364	2.21137e-187	0
Ranbp3	2.78726e-191	0.266718	0.067	0.266	5.95525e-187	0
Idh3g	1.91099e-190	0.448975	0.143	0.408	4.08303e-186	0
Zfp207	1.95711e-190	0.399646	0.205	0.53	4.18156e-186	0
Taf1	5.83855e-190	0.333961	0.095	0.318	1.24746e-185	0
Ppp4r3a	1.13061e-189	0.437786	0.127	0.379	2.41567e-185	0
Ndufaf4	4.49033e-189	0.30341	0.086	0.3	9.59403e-185	0
Larp1	6.36227e-189	0.408173	0.109	0.343	1.35936e-184	0
Cnot6l	1.81324e-188	0.288959	0.091	0.309	3.87416e-184	0
Bod1l	2.47279e-188	0.35619	0.218	0.552	5.28337e-184	0
Zmym5	2.0789e-187	0.345345	0.092	0.31	4.44178e-183	0
Yipf3	5.28824e-187	0.251417	0.103	0.329	1.12989e-182	0
Hbs1l	6.57295e-187	0.298711	0.083	0.294	1.40438e-182	0
Gatad2b	5.85134e-186	0.37695	0.175	0.465	1.2502e-181	0
Pik3ca	1.39095e-185	0.269704	0.082	0.291	2.97191e-181	0
Sdf4	1.31754e-184	0.410919	0.127	0.373	2.81506e-180	0
Poldip3	2.23221e-183	0.300767	0.092	0.308	4.76934e-179	0
Sel1l3	1.72027e-182	2.19616	0.284	0.161	3.67553e-178	0
Riok1	1.88556e-182	0.314717	0.08	0.284	4.02869e-178	0
Tfdp2	1.44142e-181	0.352828	0.093	0.308	3.07974e-177	0
Prkacb	2.42872e-181	0.293337	0.151	0.414	5.18921e-177	0
Pdhb	3.57234e-181	0.412328	0.187	0.486	7.63267e-177	0
Fam53b	4.65136e-181	0.368744	0.127	0.37	9.93809e-177	0
Ylpm1	8.3461e-181	0.472808	0.125	0.367	1.78323e-176	0
Pten	3.94802e-180	0.293586	0.162	0.434	8.43534e-176	0
Rchy1	4.4452e-180	0.269074	0.097	0.314	9.49761e-176	0
Macf1	8.7727e-180	1.43742	0.578	0.642	1.87438e-175	0
Sphkap	1.0268e-179	1.68923	0.455	0.381	2.19386e-175	0
Cnot2	1.08063e-179	0.379454	0.102	0.324	2.30888e-175	0
Fam120a	2.31497e-179	0.332867	0.087	0.295	4.94617e-175	0
Barhl2	7.88541e-179	0.279306	0.11	0.336	1.6848e-174	0
Txlna	9.36492e-179	0.387796	0.086	0.293	2.00091e-174	0
Camsap1	1.24615e-178	0.329448	0.118	0.352	2.66253e-174	0
Tcf12	2.06029e-178	0.383199	0.195	0.498	4.40201e-174	0
Zfp871	8.92245e-178	0.414358	0.131	0.376	1.90637e-173	0
Coq10b	1.08705e-177	0.309853	0.089	0.296	2.32259e-173	0
Stx16	2.81408e-177	0.334619	0.187	0.479	6.01256e-173	0
Ap3b2	4.07963e-177	0.3313	0.108	0.331	8.71653e-173	0
Polb	7.36031e-177	0.416108	0.142	0.396	1.5726e-172	0
Ghitm	1.28638e-176	0.385825	0.167	0.442	2.74848e-172	0
Stard7	1.60955e-176	0.327145	0.076	0.274	3.43896e-172	0
Pom121	2.40369e-176	0.276848	0.081	0.281	5.13573e-172	0
Auh	2.6013e-176	0.266642	0.077	0.274	5.55793e-172	0
Smg1	2.91574e-176	2.21622	0.448	0.397	6.22977e-172	0
Zfp329	3.65378e-176	0.336031	0.136	0.383	7.80667e-172	0
Aff4	4.19589e-176	0.345323	0.198	0.5	8.96495e-172	0
Tmem131	5.18157e-176	0.357574	0.104	0.323	1.10709e-171	0
Add1	7.1092e-176	0.338735	0.154	0.417	1.51895e-171	0
Vps41	2.23354e-175	0.322355	0.098	0.311	4.77218e-171	0
Copg1	2.26483e-175	0.346363	0.115	0.344	4.83903e-171	0
Snx27	2.32183e-175	0.278564	0.077	0.273	4.96081e-171	0
Setd1b	5.15765e-175	0.270956	0.087	0.292	1.10198e-170	0
Cnpy1	8.03668e-175	2.26277	0.363	0.261	1.71712e-170	0
Ccdc174	5.37312e-174	0.371772	0.107	0.327	1.14802e-169	0
Zmym2	5.71694e-174	0.344273	0.09	0.296	1.22148e-169	0
Chn2	1.36989e-173	1.25198	0.373	0.229	2.9269e-169	0
Cisd2	1.65118e-173	0.434316	0.212	0.531	3.52791e-169	0
Spen	1.70963e-173	0.472932	0.148	0.403	3.65279e-169	0
Tbc1d15	6.39976e-173	0.377727	0.078	0.274	1.36737e-168	0
Rbm28	1.01507e-172	0.480207	0.11	0.334	2.1688e-168	0
Usp7	1.11758e-172	0.518938	0.162	0.431	2.38782e-168	0
Hadhb	1.31866e-172	0.283976	0.076	0.27	2.81745e-168	0
Ddx50	2.38446e-172	0.401274	0.22	0.544	5.09464e-168	0
Med13	5.01095e-172	0.475405	0.144	0.395	1.07064e-167	0
Tm9sf3	7.54907e-172	0.331314	0.192	0.485	1.61293e-167	0
Sacs	1.02643e-170	0.430923	0.139	0.385	2.19308e-166	0
4632427E13Rik	1.37453e-170	0.387686	0.188	0.474	2.93682e-166	0
Tecpr1	3.3089e-170	2.32863	0.367	0.272	7.0698e-166	0
Kansl1	6.37787e-170	0.49726	0.151	0.409	1.3627e-165	0
Serinc1	1.21647e-169	1.23472	0.608	0.717	2.5991e-165	0
1700025G04Rik	1.3198e-169	0.447773	0.106	0.322	2.81989e-165	0
Gpi1	1.68307e-169	0.273587	0.214	0.522	3.59604e-165	0
Appl1	2.24916e-169	0.45769	0.141	0.388	4.80556e-165	0
Dpf2	2.72889e-169	0.333887	0.088	0.289	5.83055e-165	0
Grik2	3.59828e-169	1.78639	0.442	0.373	7.68809e-165	0
Epc1	5.3427e-169	0.34936	0.162	0.424	1.14152e-164	0
Ccny	9.91823e-169	0.256711	0.084	0.282	2.11913e-164	0
Phf21a	4.02917e-168	0.491683	0.097	0.305	8.60873e-164	0
Jak1	6.58138e-168	0.303316	0.122	0.351	1.40618e-163	0
Phactr3	8.85086e-168	2.17045	0.307	0.194	1.89108e-163	0
Lnpk	1.61179e-167	0.356506	0.126	0.356	3.44374e-163	0
Mark3	1.71242e-167	0.474184	0.22	0.54	3.65876e-163	0
Tpp2	2.0559e-167	0.422463	0.108	0.326	4.39265e-163	0
mt-Nd5	2.51654e-167	0.9629	0.652	0.818	5.37685e-163	0
Adam22	2.09002e-166	2.06106	0.375	0.278	4.46554e-162	0
Dpm1	2.31571e-166	0.470916	0.203	0.508	4.94774e-162	0
Snrnp200	1.12312e-165	0.457599	0.128	0.36	2.39966e-161	0
Dvl3	1.46748e-165	0.298534	0.089	0.289	3.13541e-161	0
Adamts10	2.12389e-165	2.66425	0.26	0.148	4.53791e-161	0
Gps2	4.77124e-165	0.335789	0.072	0.257	1.01942e-160	0
Nptxr	5.68036e-165	1.87058	0.337	0.221	1.21367e-160	0
Nmt1	6.66674e-165	0.487378	0.104	0.315	1.42441e-160	0
Pds5a	1.09257e-164	0.492321	0.136	0.375	2.33438e-160	0
Cbfa2t3	1.66357e-164	0.275224	0.153	0.404	3.55439e-160	0
Dcaf8	1.71314e-164	0.488232	0.139	0.38	3.66029e-160	0
Cdc23	3.03552e-164	0.353964	0.077	0.266	6.4857e-160	0
Baz2b	4.15716e-164	0.458026	0.157	0.414	8.88219e-160	0
Ank3	1.05416e-163	0.86813	0.669	0.798	2.25232e-159	0
Ctr9	3.05989e-163	0.427263	0.097	0.3	6.53775e-159	0
Mtrex	4.79321e-163	0.368983	0.091	0.289	1.02412e-158	0
5031425E22Rik	4.87899e-163	0.271652	0.078	0.266	1.04244e-158	0
Trip12	5.62509e-163	0.51667	0.14	0.379	1.20186e-158	0
Hectd1	8.91314e-163	0.409414	0.206	0.506	1.90438e-158	0
Nemf	1.13693e-162	0.458452	0.18	0.456	2.42917e-158	0
Ociad1	2.77699e-162	0.437387	0.169	0.435	5.93331e-158	0
Fgf9	6.70933e-162	0.262154	0.094	0.295	1.43352e-157	0
Zc3h14	1.088e-161	0.598037	0.137	0.375	2.32461e-157	0
Sdha	1.16166e-161	0.49	0.175	0.447	2.482e-157	0
Tut7	2.16646e-161	0.414546	0.099	0.303	4.62887e-157	0
Tasor2	7.35837e-161	0.276812	0.072	0.255	1.57219e-156	0
Cxxc1	2.06598e-160	0.406444	0.072	0.254	4.41418e-156	0
Ago2	2.96234e-160	0.408944	0.091	0.287	6.32934e-156	0
Ppp3cb	3.16581e-160	0.452907	0.216	0.525	6.76407e-156	0
Bin1	2.21853e-159	0.385377	0.219	0.526	4.7401e-155	0
Gpatch11	2.42382e-159	0.326601	0.071	0.252	5.17872e-155	0
Rbm26	5.90693e-159	0.487097	0.197	0.485	1.26207e-154	0
Nipa2	6.64198e-159	0.398832	0.092	0.288	1.41913e-154	0
Thap2	6.84699e-159	0.436917	0.087	0.28	1.46293e-154	0
Golgb1	7.71922e-159	0.443594	0.206	0.503	1.64929e-154	0
Rbm4b	3.61792e-158	0.449057	0.158	0.409	7.73005e-154	0
Atn1	4.05161e-158	0.313469	0.078	0.264	8.65668e-154	0
Aqr	4.93689e-158	0.332424	0.075	0.257	1.05481e-153	0
Fam76b	5.62512e-158	0.509531	0.116	0.332	1.20186e-153	0
Acaca	1.46913e-157	0.254771	0.074	0.255	3.13894e-153	0
Mllt10	2.06743e-157	0.565309	0.122	0.343	4.41728e-153	0
Clptm1l	2.47382e-157	0.335799	0.078	0.263	5.28557e-153	0
Cdk13	3.70591e-157	0.388692	0.094	0.292	7.91805e-153	0
Ccdc186	4.59056e-157	0.499578	0.13	0.357	9.8082e-153	0
Bcl2l1	8.14085e-157	0.260849	0.076	0.259	1.73937e-152	0
Rexo1	8.76988e-157	0.539851	0.132	0.361	1.87377e-152	0
Thoc2	1.19967e-156	0.513419	0.203	0.496	2.56322e-152	0
Dgcr2	3.58482e-156	0.379486	0.112	0.323	7.65933e-152	0
Msl1	4.28242e-156	0.523287	0.135	0.366	9.14982e-152	0
Spire1	6.23368e-156	0.547664	0.149	0.392	1.33189e-151	0
Phrf1	1.06305e-155	0.459728	0.077	0.259	2.27132e-151	0
Angel2	1.62659e-155	0.555805	0.119	0.336	3.47537e-151	0
Nckap1	1.69965e-155	0.416732	0.165	0.419	3.63147e-151	0
Scfd1	2.73494e-155	0.359223	0.087	0.276	5.84348e-151	0
Senp2	4.56898e-155	0.41501	0.106	0.311	9.76209e-151	0
Msi2	6.46894e-155	0.443196	0.202	0.489	1.38215e-150	0
Dnajc5	2.04951e-154	0.493522	0.153	0.397	4.37899e-150	0
Taok1	4.3143e-154	0.461883	0.161	0.412	9.21794e-150	0
Tm2d3	4.32449e-154	0.315167	0.075	0.254	9.23971e-150	0
Supt5	5.6993e-154	0.459413	0.11	0.317	1.21771e-149	0
Tmcc1	1.05986e-153	0.307112	0.156	0.399	2.26449e-149	0
Tmem33	1.154e-153	0.26955	0.085	0.271	2.46564e-149	0
Txndc15	1.3836e-153	0.351439	0.131	0.355	2.9562e-149	0
Telo2	6.13085e-153	0.324821	0.076	0.254	1.30992e-148	0
Nufip2	1.11313e-152	0.548717	0.123	0.341	2.37831e-148	0
Psme4	3.82697e-152	0.583511	0.115	0.326	8.17671e-148	0
Ppp5c	5.67244e-152	0.535605	0.13	0.354	1.21197e-147	0
Ep400	7.65084e-152	0.563955	0.146	0.383	1.63468e-147	0
Setd5	1.90225e-151	0.638564	0.156	0.401	4.06434e-147	0
Dguok	2.00767e-151	0.475536	0.094	0.288	4.28959e-147	0
Eif4e3	2.27557e-151	0.288807	0.092	0.282	4.86199e-147	0
Cyhr1	2.42352e-151	0.55507	0.174	0.436	5.17809e-147	0
Usp9x	3.49662e-151	0.413413	0.211	0.503	7.47087e-147	0
Spock1	3.88664e-151	2.08617	0.257	0.147	8.30419e-147	0
Slc25a27	6.40169e-151	0.383812	0.177	0.438	1.36779e-146	0
Psap	2.54783e-150	1.37244	0.528	0.534	5.4437e-146	0
Ctdspl2	4.80684e-150	0.51298	0.11	0.314	1.02703e-145	0
Max	5.49839e-150	0.456722	0.083	0.266	1.17479e-145	0
1500004A13Rik	1.49058e-149	0.317972	0.115	0.321	3.18477e-145	0
Bcap31	3.92167e-149	0.454743	0.165	0.415	8.37904e-145	0
Wdr70	6.38978e-149	0.451273	0.078	0.256	1.36524e-144	0
Numbl	8.26309e-149	0.338661	0.083	0.264	1.76549e-144	0
Wasf1	8.78986e-149	0.339462	0.113	0.318	1.87804e-144	0
Man1a2	8.79648e-149	0.539057	0.138	0.365	1.87946e-144	0
Ralgds	9.24573e-149	0.362476	0.076	0.252	1.97544e-144	0
Pip4p1	3.45503e-148	0.324865	0.075	0.25	7.38201e-144	0
Dhx30	4.95956e-148	0.403491	0.172	0.425	1.05966e-143	0
Tmx3	7.5943e-148	0.479105	0.119	0.329	1.6226e-143	0
Hmg20a	1.38664e-147	0.454287	0.096	0.287	2.96269e-143	0
Dync1li2	1.57153e-147	0.492699	0.165	0.414	3.35774e-143	0
Ndst3	1.58922e-147	1.93491	0.32	0.216	3.39552e-143	0
Setd3	2.91583e-147	0.564274	0.123	0.335	6.22997e-143	0
Eftud2	1.42427e-146	0.586714	0.1	0.294	3.04309e-142	0
Ccnt1	3.82937e-146	0.592536	0.118	0.326	8.18183e-142	0
Ewsr1	6.20275e-146	0.325456	0.285	0.654	1.32528e-141	0
Sec61a1	7.53193e-146	0.464351	0.096	0.285	1.60927e-141	0
Dmtf1	1.26764e-145	0.528894	0.137	0.36	2.70844e-141	0
Cpsf6	1.82839e-145	0.430811	0.252	0.585	3.90654e-141	0
Ube2q2	2.2034e-145	0.442044	0.094	0.283	4.70778e-141	0
Msra	5.40922e-145	0.309453	0.097	0.286	1.15573e-140	0
Pdpk1	1.36366e-144	0.487418	0.091	0.276	2.9136e-140	0
Pwwp2a	1.64027e-144	0.521704	0.113	0.316	3.5046e-140	0
Trpc4ap	2.44982e-144	0.325604	0.212	0.495	5.23429e-140	0
Arfgap2	2.61311e-144	0.581364	0.127	0.34	5.58318e-140	0
Atp6v1c1	2.64808e-144	0.407387	0.111	0.311	5.65788e-140	0
Agpat4	1.16141e-143	0.256826	0.122	0.328	2.48147e-139	0
Lrp6	1.71628e-143	0.427086	0.099	0.289	3.667e-139	0
5330434G04Rik	1.03929e-142	2.14401	0.304	0.202	2.22056e-138	0
Fkbp2	1.14082e-142	0.428335	0.25	0.579	2.43748e-138	0
Zzz3	1.3355e-142	0.54868	0.079	0.252	2.85343e-138	0
Klhdc10	2.58888e-142	0.521872	0.118	0.322	5.53141e-138	0
Gtf3c2	2.59374e-141	0.544665	0.094	0.279	5.54178e-137	0
Fam173a	2.67633e-141	0.425162	0.209	0.49	5.71825e-137	0
Usp47	2.89366e-141	0.602235	0.131	0.346	6.18259e-137	0
Qrich1	4.34321e-141	0.52395	0.082	0.258	9.27971e-137	0
Gpsm1	4.57821e-141	0.538229	0.131	0.344	9.7818e-137	0
Nbr1	1.03256e-140	0.475444	0.112	0.311	2.20617e-136	0
Rabgap1	3.16287e-140	0.539529	0.143	0.366	6.75779e-136	0
Rlf	4.00863e-140	0.437099	0.096	0.281	8.56483e-136	0
Pik3r3	5.73191e-140	0.295014	0.157	0.389	1.22468e-135	0
Abi2	2.17306e-139	0.507155	0.151	0.381	4.64297e-135	0
Ganab	2.44744e-139	0.388993	0.092	0.272	5.22919e-135	0
Dnajc10	3.15009e-139	0.418784	0.091	0.271	6.73048e-135	0
Ptprd	3.90923e-139	1.23867	0.579	0.693	8.35247e-135	0
Fbxo3	6.06696e-139	0.539954	0.082	0.255	1.29627e-134	0
Fam168a	6.48718e-139	0.503324	0.141	0.36	1.38605e-134	0
Atad2b	6.7156e-139	0.606774	0.149	0.376	1.43486e-134	0
Hnrnpm	2.94776e-138	0.379187	0.272	0.62	6.29818e-134	0
Gigyf2	3.33269e-138	0.520009	0.118	0.319	7.12063e-134	0
Srrm1	1.08079e-137	0.291494	0.301	0.675	2.30921e-133	0
Cnot3	1.51997e-137	0.684712	0.143	0.366	3.24758e-133	0
Abca2	1.60171e-137	1.98135	0.31	0.209	3.42222e-133	0
Plxnb2	2.30832e-137	0.453655	0.197	0.464	4.93196e-133	0
Kdm5c	2.96198e-137	0.493603	0.093	0.274	6.32858e-133	0
Ythdc1	9.48414e-137	0.562346	0.223	0.518	2.02638e-132	0
Ddrgk1	2.55669e-136	0.565826	0.162	0.4	5.46263e-132	0
Virma	3.29984e-136	0.480518	0.082	0.253	7.05044e-132	0
Phactr1	3.47859e-136	0.420362	0.084	0.257	7.43236e-132	0
Snrnp48	4.48985e-136	0.620175	0.183	0.44	9.59302e-132	0
Ackr1	7.17136e-136	1.83709	0.345	0.253	1.53223e-131	0
Ogdh	7.83839e-136	0.506324	0.128	0.336	1.67475e-131	0
Chd8	9.43282e-136	0.675618	0.138	0.354	2.01542e-131	0
Atxn2	1.14476e-135	0.615405	0.162	0.399	2.44588e-131	0
Gnl3l	1.3445e-135	0.497222	0.116	0.314	2.87266e-131	0
Cryzl1	1.86492e-135	0.500475	0.1	0.284	3.98458e-131	0
Stk38	2.14686e-135	0.594943	0.165	0.404	4.58697e-131	0
Proser1	2.9541e-135	0.356205	0.084	0.255	6.31173e-131	0
Fus	5.78296e-135	1.01581	0.612	0.8	1.23559e-130	0
Gon4l	1.70207e-134	0.671806	0.173	0.419	3.63665e-130	0
Pura	1.89264e-134	0.263177	0.3	0.654	4.0438e-130	0
Ttc4	2.4222e-134	0.569164	0.108	0.298	5.17526e-130	0
Rock1	2.74058e-134	0.627586	0.202	0.476	5.85553e-130	0
Tmx2	2.91325e-134	0.440057	0.129	0.335	6.22446e-130	0
Fxr2	4.57803e-134	0.564923	0.09	0.266	9.78142e-130	0
Numa1	4.83193e-134	0.670345	0.138	0.354	1.03239e-129	0
Epm2aip1	5.83721e-134	0.479069	0.123	0.324	1.24718e-129	0
Upf3b	1.90047e-133	0.605462	0.181	0.432	4.06054e-129	0
Dhx36	1.97383e-133	0.336393	0.296	0.661	4.21729e-129	0
Supt6	2.21937e-133	0.587818	0.145	0.365	4.7419e-129	0
Mpp3	2.76395e-133	2.19541	0.28	0.182	5.90546e-129	0
Asap2	4.51076e-133	0.434385	0.09	0.265	9.63769e-129	0
Kdm7a	6.8449e-133	0.295643	0.088	0.26	1.46248e-128	0
Brd9	3.19388e-132	0.53125	0.172	0.412	6.82403e-128	0
Colgalt1	6.01425e-132	0.457426	0.083	0.25	1.285e-127	0
Kmt5b	6.59302e-132	0.571801	0.15	0.372	1.40867e-127	0
Pcp4	7.582e-132	1.75685	0.342	0.248	1.61997e-127	0
Cnrip1	1.75081e-131	0.496713	0.18	0.427	3.74079e-127	0
Xiap	1.79969e-131	0.526732	0.105	0.29	3.84522e-127	0
Strn4	1.42571e-130	0.598971	0.099	0.279	3.04616e-126	0
Gnai1	1.74172e-130	0.399325	0.121	0.316	3.72136e-126	0
Emsy	2.10523e-130	0.684215	0.135	0.344	4.49804e-126	0
Slc4a4	4.37243e-130	0.528805	0.331	0.218	9.34214e-126	0
Sppl3	6.18886e-130	0.502284	0.093	0.266	1.32231e-125	0
Map4	6.70472e-130	0.436606	0.161	0.387	1.43253e-125	0
Yeats2	7.34417e-130	0.520934	0.091	0.263	1.56916e-125	0
Macrod2	1.24325e-129	0.432511	0.102	0.282	2.65633e-125	0
Ube4b	2.25207e-129	0.655077	0.125	0.324	4.81176e-125	0
Cltc	5.01429e-129	0.464945	0.247	0.552	1.07135e-124	0
Dlat	5.8387e-129	0.529346	0.092	0.265	1.2475e-124	0
Dnm3	6.38555e-129	1.90491	0.275	0.175	1.36434e-124	0
2610507B11Rik	8.67119e-129	0.654405	0.122	0.318	1.85269e-124	0
Olfm1	9.86457e-129	1.44836	0.485	0.468	2.10766e-124	0
Ppp1r37	2.23534e-128	0.532419	0.095	0.27	4.77603e-124	0
Gls	5.22763e-128	1.82365	0.457	0.45	1.11694e-123	0
Dennd5a	8.81596e-128	0.623387	0.132	0.336	1.88362e-123	0
Birc2	9.75511e-128	0.476874	0.118	0.309	2.08428e-123	0
4833420G17Rik	1.81023e-127	0.612665	0.164	0.395	3.86773e-123	0
Parp6	1.90021e-127	0.489113	0.111	0.297	4.05999e-123	0
Amer2	2.09243e-127	0.492743	0.157	0.38	4.47068e-123	0
Brpf1	3.4985e-127	0.617166	0.111	0.296	7.4749e-123	0
Opa1	4.27069e-127	0.608706	0.134	0.339	9.12476e-123	0
Usp46	8.46822e-127	0.584848	0.215	0.49	1.80932e-122	0
Srsf1	1.17748e-126	0.402325	0.272	0.608	2.5158e-122	0
Arih1	2.31728e-126	0.606543	0.105	0.286	4.9511e-122	0
Ndrg3	7.49309e-126	1.54962	0.444	0.402	1.60097e-121	0
Coro2b	8.15156e-126	0.596481	0.171	0.405	1.74166e-121	0
Casc3	2.3739e-125	0.66999	0.128	0.327	5.07208e-121	0
Idh3b	2.39012e-125	0.559595	0.207	0.474	5.10672e-121	0
Casc4	3.14749e-125	0.536537	0.161	0.385	6.72492e-121	0
Nisch	3.5619e-125	0.443111	0.278	0.614	7.61035e-121	0
Gbf1	5.56108e-125	0.575367	0.094	0.265	1.18818e-120	0
mt-Atp8	1.23084e-124	1.33804	0.551	0.65	2.62982e-120	0
Safb	4.1233e-124	0.69767	0.21	0.48	8.80984e-120	0
Mettl26	2.24486e-123	0.637409	0.104	0.282	4.79637e-119	0
Dab2ip	3.93972e-123	1.8226	0.439	0.423	8.41761e-119	0
Sestd1	4.224e-123	0.515776	0.089	0.254	9.02501e-119	0
Actn4	4.78617e-123	0.59702	0.107	0.286	1.02261e-118	0
Pgrmc1	1.62453e-122	0.308142	0.282	0.612	3.47096e-118	0
Lrrfip2	1.75575e-122	0.6317	0.094	0.262	3.75133e-118	0
Vps50	5.33424e-122	0.427157	0.108	0.285	1.13971e-117	0
Cic	5.48089e-122	0.58594	0.112	0.294	1.17105e-117	0
Add2	2.01393e-121	0.411007	0.092	0.258	4.30296e-117	0
Cstf3	2.77842e-121	0.589598	0.089	0.254	5.93638e-117	0
Stxbp5l	2.84737e-121	1.63691	0.415	0.366	6.08368e-117	0
Dlst	9.09197e-121	0.69454	0.136	0.337	1.94259e-116	0
Adam10	1.79964e-120	0.346054	0.153	0.362	3.84511e-116	0
Dusp8	3.65693e-120	0.372362	0.153	0.364	7.8134e-116	0
Raf1	9.87222e-120	0.698033	0.174	0.406	2.1093e-115	0
Ddx24	1.64225e-119	0.604804	0.253	0.562	3.50883e-115	0
Fam57b	2.50162e-119	0.535359	0.161	0.38	5.34497e-115	0
Rmnd5a	5.20862e-119	0.501144	0.111	0.289	1.11287e-114	0
Cdk8	2.7864e-118	0.569367	0.122	0.308	5.95343e-114	0
Haghl	3.44318e-118	0.462657	0.147	0.352	7.35669e-114	0
Agpat3	6.12086e-118	0.605322	0.175	0.404	1.30778e-113	0
Gcn1	1.36965e-117	0.70248	0.118	0.3	2.92639e-113	0
Zfp638	1.68331e-117	0.529211	0.267	0.586	3.59655e-113	0
Zcchc8	9.32635e-117	0.673891	0.092	0.254	1.99267e-112	0
Wnk1	2.56379e-116	0.718169	0.206	0.464	5.47779e-112	0
Sh3gl1	3.80958e-116	0.686113	0.143	0.346	8.13955e-112	0
Pkn2	6.61713e-116	0.67112	0.167	0.388	1.41382e-111	0
Mark2	2.19374e-115	0.73632	0.119	0.3	4.68714e-111	0
Usp16	2.92235e-115	0.739857	0.116	0.297	6.24389e-111	0
Mical3	4.70933e-115	2.21842	0.329	0.255	1.0062e-110	0
Slc30a9	1.00172e-114	0.681501	0.103	0.273	2.14027e-110	0
Slc24a5	1.62791e-114	0.401523	0.277	0.595	3.47819e-110	0
Anapc1	7.10124e-114	0.753532	0.102	0.271	1.51725e-109	0
Zcchc14	8.91623e-114	0.722698	0.118	0.297	1.90504e-109	0
Spop	1.5685e-113	0.346486	0.228	0.49	3.35126e-109	0
Tmem145	2.26439e-113	1.97265	0.268	0.177	4.8381e-109	0
Lrp11	2.34396e-113	0.524784	0.093	0.253	5.0081e-109	0
Pnisr	2.97074e-113	1.06188	0.597	0.777	6.34728e-109	0
Cnot1	5.00133e-113	0.758117	0.162	0.377	1.06858e-108	0
Trim44	6.94476e-113	0.619182	0.188	0.425	1.48382e-108	0
Klf9	1.55642e-112	0.293471	0.286	0.597	3.32545e-108	0
Golm1	2.25124e-112	0.584194	0.111	0.283	4.81001e-108	0
Cd2ap	2.4134e-112	0.681207	0.129	0.316	5.15646e-108	0
Smc5	2.93107e-112	0.800702	0.125	0.31	6.26253e-108	0
Dst	5.33144e-112	1.36037	0.546	0.666	1.13912e-107	0
Taf1d	1.25684e-111	0.643114	0.185	0.418	2.68536e-107	0
Ppp1r9a	2.22976e-111	0.608621	0.142	0.338	4.76411e-107	0
Fto	2.49474e-111	0.737178	0.108	0.278	5.33026e-107	0
Rc3h2	5.69747e-111	0.683538	0.151	0.354	1.21732e-106	0
Btbd3	8.94211e-111	1.19138	0.492	0.467	1.91057e-106	0
Emc7	1.059e-110	0.538837	0.175	0.395	2.26265e-106	0
Xpr1	1.63551e-110	0.298348	0.102	0.264	3.49444e-106	0
Eea1	2.23638e-110	0.586241	0.094	0.252	4.77825e-106	0
Zfp280d	2.76884e-110	0.680714	0.177	0.4	5.91591e-106	0
Rb1	3.73509e-110	0.733811	0.118	0.296	7.9804e-106	0
Cdc40	4.35621e-110	0.751864	0.177	0.403	9.30747e-106	0
A330076H08Rik	7.27539e-110	0.759486	0.597	0.639	1.55446e-105	0
Srrm2	2.15644e-109	0.717232	0.669	0.885	4.60744e-105	0
Grina	2.20829e-109	1.52462	0.44	0.421	4.71823e-105	0
Fam193a	3.29514e-109	0.770738	0.126	0.308	7.04039e-105	0
Comt	1.04344e-108	0.597155	0.125	0.305	2.22941e-104	0
Jakmip2	1.85586e-108	0.561894	0.104	0.268	3.96522e-104	0
Snapc3	2.29296e-108	0.643361	0.094	0.251	4.89914e-104	0
Rabl6	6.50482e-108	0.819137	0.151	0.353	1.38982e-103	0
Las1l	1.86435e-107	0.730406	0.105	0.268	3.98337e-103	0
Atp6v1b2	2.64701e-107	0.559283	0.175	0.392	5.6556e-103	0
Gas7	5.24542e-106	1.63211	0.263	0.169	1.12074e-101	0
Inpp5f	1.09317e-105	0.590936	0.123	0.299	2.33566e-101	0
Kif21a	3.27162e-105	0.648341	0.214	0.466	6.99014e-101	0
Phf3	3.58938e-105	0.513618	0.276	0.591	7.66907e-101	0
Nr2c2	5.14921e-105	0.743262	0.116	0.286	1.10018e-100	0
Senp7	8.25733e-105	0.677777	0.128	0.307	1.76426e-100	0
Syp	1.08312e-104	1.46293	0.426	0.393	2.3142e-100	0
Dennd5b	1.48602e-104	0.674487	0.135	0.319	3.17504e-100	0
Araf	2.53293e-104	0.572896	0.16	0.362	5.41187e-100	0
Vezt	9.65709e-104	0.490985	0.121	0.293	2.06333e-99	0
Wdr33	1.06314e-103	0.67513	0.231	0.499	2.27151e-99	0
Ubr5	1.08627e-103	0.744424	0.175	0.391	2.32093e-99	0
Cwf19l2	1.59205e-103	0.67979	0.096	0.25	3.40157e-99	0
Rsbn1	1.61416e-103	0.69421	0.132	0.313	3.44882e-99	0
B3gat3	2.73279e-103	0.643773	0.108	0.27	5.83888e-99	0
Lhfp	2.9775e-103	1.78997	0.286	0.203	6.36173e-99	0
Fam171b	1.49517e-102	0.544325	0.191	0.417	3.19459e-98	0
D10Wsu102e	3.89051e-102	0.850141	0.151	0.346	8.31246e-98	0
Dnajc1	5.13027e-102	0.691564	0.123	0.296	1.09613e-97	0
Actr1b	7.89463e-102	0.717698	0.108	0.269	1.68677e-97	0
Cadm4	1.22455e-101	0.421676	0.168	0.371	2.61637e-97	0
Baz1b	2.68534e-101	0.68792	0.236	0.508	5.73749e-97	0
Cux1	3.42775e-101	0.641217	0.25	0.535	7.32372e-97	0
Tob2	7.17776e-101	0.672725	0.129	0.303	1.5336e-96	0
Washc2	2.75472e-100	0.694503	0.129	0.304	5.88574e-96	0
Camk2d	2.88522e-100	1.15718	0.49	0.49	6.16456e-96	0
Pcf11	3.58753e-100	0.723054	0.098	0.251	7.66511e-96	0
Ubp1	7.83611e-100	0.862089	0.113	0.276	1.67426e-95	0
C1qtnf4	9.29783e-100	1.57416	0.294	0.208	1.98657e-95	0
4930402H24Rik	1.25167e-99	0.422843	0.128	0.298	2.67431e-95	0
Picalm	1.27505e-99	0.768942	0.17	0.377	2.72426e-95	0
Brwd1	2.60033e-99	0.798457	0.192	0.418	5.55587e-95	0
Lrpap1	3.02503e-99	0.362396	0.159	0.352	6.46328e-95	0
Afdn	3.27127e-99	0.601327	0.23	0.487	6.98939e-95	0
Setd2	4.35868e-99	0.796701	0.164	0.367	9.31275e-95	0
Lrrn1	5.37899e-99	0.599494	0.106	0.262	1.14927e-94	0
Paxx	6.70709e-99	0.260236	0.142	0.32	1.43304e-94	0
Ubr4	8.19184e-99	0.810402	0.126	0.299	1.75027e-94	0
Foxn3	9.64494e-99	0.724133	0.198	0.428	2.06074e-94	0
Zfp219	1.78978e-98	0.946498	0.121	0.291	3.82404e-94	0
Brinp1	2.13873e-98	1.96095	0.263	0.182	4.56961e-94	0
Kdm2a	3.71889e-98	0.811729	0.177	0.389	7.94579e-94	0
Supt20	4.65347e-98	0.811005	0.134	0.312	9.94259e-94	0
Atxn2l	7.80392e-98	0.750124	0.222	0.476	1.66739e-93	0
Nmt2	1.40881e-97	0.753473	0.1	0.253	3.01007e-93	0
Arl8b	2.48925e-97	0.835911	0.113	0.275	5.31853e-93	0
Mtdh	2.6802e-97	0.305135	0.34	0.707	5.72653e-93	0
Setx	2.81746e-97	0.840729	0.129	0.302	6.01979e-93	0
Derl1	4.98541e-97	0.646326	0.12	0.285	1.06518e-92	0
Bdp1	9.87276e-97	0.877013	0.103	0.256	2.10941e-92	0
Dido1	1.90588e-96	0.810592	0.138	0.318	4.07211e-92	0
Cep295	3.94387e-96	0.786887	0.112	0.272	8.42648e-92	0
Swt1	5.10467e-96	0.773183	0.151	0.339	1.09066e-91	0
Madd	8.50284e-96	1.97046	0.317	0.251	1.81672e-91	0
Camsap2	2.25101e-95	0.651981	0.105	0.258	4.80951e-91	0
Zswim8	4.78059e-95	0.717866	0.118	0.28	1.02142e-90	0
Nck1	4.95824e-95	0.658876	0.108	0.263	1.05938e-90	0
Atp6v1a	9.28118e-95	0.496	0.227	0.471	1.98302e-90	0
Pak7	1.49632e-94	0.407552	0.116	0.274	3.19703e-90	0
Fat1	2.67703e-94	2.36493	0.28	0.209	5.71974e-90	0
Tacc2	2.67934e-94	0.608675	0.128	0.296	5.72467e-90	0
Rbm6	4.20164e-94	0.893125	0.162	0.358	8.97723e-90	0
Canx	4.37739e-94	0.414563	0.301	0.622	9.35272e-90	0
Epb41	4.74833e-94	1.7789	0.466	0.522	1.01453e-89	0
Scg5	8.02987e-94	1.0793	0.576	0.709	1.71566e-89	0
Tra2a	9.56968e-94	0.392726	0.333	0.692	2.04466e-89	0
Trrap	9.65403e-94	0.772807	0.139	0.315	2.06268e-89	0
Ppp1r12c	9.98762e-94	0.785947	0.106	0.257	2.13395e-89	0
Ndufs1	1.112e-93	0.759854	0.15	0.337	2.3759e-89	0
Ep300	1.40025e-93	0.774474	0.149	0.334	2.99177e-89	0
Stx5a	1.95156e-93	0.77241	0.122	0.285	4.16971e-89	0
Pcgf6	3.35307e-93	0.723887	0.101	0.25	7.16418e-89	0
Mgat4b	3.85998e-93	0.837808	0.146	0.329	8.24723e-89	0
Atl1	6.44877e-93	0.535801	0.142	0.319	1.37784e-88	0
Igf1r	8.13295e-93	0.753146	0.118	0.277	1.73769e-88	0
Luzp1	1.4138e-92	0.719494	0.132	0.302	3.02072e-88	0
Fbxo21	3.13464e-92	0.640237	0.108	0.26	6.69747e-88	0
Phip	3.60713e-92	0.535812	0.291	0.603	7.707e-88	0
Spag9	5.01154e-92	0.495819	0.3	0.62	1.07076e-87	0
Tnrc18	8.25785e-92	0.842245	0.115	0.272	1.76437e-87	0
Mgll	4.47798e-91	0.690391	0.154	0.339	9.56765e-87	0
Gnao1	6.11828e-91	0.353189	0.29	0.583	1.30723e-86	0
Zmynd11	7.02814e-91	0.75178	0.244	0.511	1.50163e-86	0
Dzip3	7.28964e-91	0.806184	0.16	0.35	1.5575e-86	0
Rnf8	9.84644e-91	0.905739	0.134	0.305	2.10379e-86	0
N4bp2l2	1.52062e-90	0.748873	0.228	0.479	3.24895e-86	0
Ndn	1.9669e-90	0.530195	0.19	0.401	4.20249e-86	0
Ube3c	2.016e-90	0.740647	0.129	0.294	4.30739e-86	0
Ranbp2	4.37325e-90	0.74828	0.188	0.4	9.34388e-86	0
Kidins220	1.2881e-89	0.314537	0.192	0.394	2.75215e-85	0
Dtx3	1.32524e-89	0.696546	0.169	0.363	2.83151e-85	0
Upf1	2.84409e-89	0.813752	0.134	0.302	6.07669e-85	0
Asxl2	3.23669e-89	0.844077	0.121	0.279	6.91551e-85	0
Gdap1	1.55859e-88	0.706017	0.147	0.324	3.33008e-84	0
Arhgef12	2.24423e-88	0.809135	0.166	0.358	4.79502e-84	0
Bsn	2.31472e-88	2.13271	0.282	0.214	4.94563e-84	0
Pcmtd1	4.29546e-88	0.651943	0.139	0.309	9.17769e-84	0
Dicer1	5.50742e-88	0.804034	0.143	0.317	1.17671e-83	0
Rab3c	5.73569e-88	0.427496	0.218	0.444	1.22549e-83	0
Srcap	4.38621e-87	0.860186	0.14	0.311	9.37158e-83	0
Atp6v0e2	6.78054e-87	0.721858	0.178	0.379	1.44873e-82	0
Schip1	7.26999e-87	0.620375	0.2	0.416	1.55331e-82	0
Ebp	1.1369e-86	0.742873	0.177	0.375	2.42909e-82	0
Ctnnd2	1.38882e-86	0.618338	0.129	0.289	2.96735e-82	0
Srpk2	1.51765e-86	0.42508	0.34	0.697	3.24262e-82	0
Fam133b	3.01459e-86	0.785494	0.236	0.489	6.44097e-82	0
March6	3.34678e-86	0.556188	0.15	0.323	7.15073e-82	0
Arfgef1	4.66317e-86	0.800501	0.135	0.301	9.96332e-82	0
Nfe2l1	5.0415e-86	0.772709	0.131	0.293	1.07717e-81	0
Agap1	5.07545e-86	0.796795	0.167	0.358	1.08442e-81	0
Got1	5.42955e-86	0.528507	0.127	0.285	1.16008e-81	0
Gprasp1	5.65136e-86	0.657901	0.16	0.342	1.20747e-81	0
Ist1	6.53035e-86	0.801453	0.112	0.26	1.39528e-81	0
Gle1	6.93028e-86	0.826367	0.135	0.301	1.48072e-81	0
Atp13a3	1.26785e-85	0.776074	0.113	0.262	2.70889e-81	0
Marf1	1.83916e-85	0.758979	0.119	0.273	3.92954e-81	0
Fam193b	4.56007e-85	0.944092	0.119	0.273	9.74305e-81	0
Cdk12	5.7152e-85	0.87442	0.158	0.34	1.22111e-80	0
Far1	7.67756e-85	0.800555	0.123	0.279	1.64039e-80	0
Arid4a	8.87513e-85	0.770492	0.189	0.397	1.89626e-80	0
Cnot4	1.50881e-84	0.835331	0.184	0.387	3.22373e-80	0
Orc4	1.70327e-84	0.849829	0.118	0.27	3.63921e-80	0
Os9	2.8675e-84	0.605438	0.142	0.308	6.1267e-80	0
Rpn1	6.96238e-84	0.62528	0.158	0.336	1.48758e-79	0
Luc7l3	7.89076e-84	0.987417	0.577	0.779	1.68594e-79	0
Zfp652	1.65029e-83	0.832817	0.116	0.266	3.52602e-79	0
Cacnb4	1.75367e-83	1.62997	0.288	0.217	3.7469e-79	0
Vmp1	3.214e-83	0.700771	0.199	0.412	6.86703e-79	0
Kdm5a	4.76842e-82	0.915022	0.136	0.299	1.01882e-77	0
Ppp3ca	5.12683e-82	0.817005	0.621	0.783	1.0954e-77	0
Atf7ip	1.05126e-81	0.847962	0.194	0.402	2.24611e-77	0
Adgrl1	1.07927e-81	1.71838	0.416	0.421	2.30597e-77	0
Ankrd17	1.31578e-81	0.89985	0.201	0.416	2.81129e-77	0
Jph4	2.33169e-81	1.55293	0.351	0.303	4.98189e-77	0
Atp8a1	3.53963e-81	2.01431	0.293	0.232	7.56277e-77	0
Ctbp2	3.87688e-81	0.909823	0.176	0.37	8.28335e-77	0
Tardbp	5.9024e-81	0.733789	0.267	0.547	1.26111e-76	0
Zcchc18	1.09015e-80	0.538252	0.167	0.348	2.32921e-76	0
Cadm1	2.80281e-80	0.546814	0.233	0.468	5.98849e-76	0
Gabbr2	3.3837e-80	1.9167	0.251	0.181	7.22962e-76	0
Sbno1	1.6637e-79	0.75802	0.257	0.522	3.55467e-75	0
Itch	1.78511e-79	0.837516	0.17	0.355	3.81407e-75	0
Napg	2.25481e-79	0.74035	0.17	0.354	4.81763e-75	0
Gpcpd1	2.38627e-79	0.668107	0.112	0.254	5.0985e-75	0
Oip5os1	2.98425e-79	0.251408	0.359	0.683	6.37616e-75	0
Chd2	6.16879e-79	0.771941	0.23	0.465	1.31802e-74	0
Chuk	1.00412e-78	0.765519	0.122	0.27	2.14539e-74	0
Galnt1	3.43923e-78	0.844405	0.146	0.312	7.34826e-74	0
Thoc1	4.17884e-78	0.85062	0.182	0.375	8.92852e-74	0
Krit1	6.42669e-78	0.725064	0.233	0.47	1.37313e-73	0
Trappc10	9.79827e-78	0.847921	0.124	0.273	2.0935e-73	0
Aebp2	1.3601e-77	0.902673	0.111	0.251	2.90599e-73	0
Rsbn1l	4.09064e-77	0.827967	0.214	0.435	8.74006e-73	0
Ino80d	6.28009e-77	0.782551	0.115	0.256	1.3418e-72	0
Atp2c1	7.31509e-77	0.68967	0.135	0.289	1.56294e-72	0
Tmem181a	1.66501e-76	2.05823	0.287	0.23	3.55746e-72	0
Rere	2.72275e-76	0.770418	0.226	0.454	5.81743e-72	0
Pde4dip	7.8506e-76	0.795239	0.163	0.338	1.67736e-71	0
Ptpra	1.77703e-75	0.779074	0.202	0.409	3.7968e-71	0
Cdip1	3.27514e-75	0.81825	0.115	0.254	6.99767e-71	0
Shf	6.22302e-75	0.329639	0.309	0.596	1.32961e-70	0
Akap8	1.12893e-74	0.967081	0.176	0.363	2.41208e-70	0
Ahctf1	1.63253e-74	1.01558	0.12	0.263	3.48806e-70	0
Slc25a36	1.7139e-74	0.756373	0.127	0.275	3.66192e-70	0
Ap2a1	2.39621e-74	0.873614	0.15	0.315	5.11973e-70	0
Tmem63b	4.64895e-74	0.470472	0.233	0.452	9.93296e-70	0
Sbf2	2.51389e-73	0.850136	0.123	0.266	5.37118e-69	0
Lrp1	3.37237e-73	1.59521	0.317	0.263	7.20541e-69	0
Cnnm3	4.07134e-73	0.820733	0.115	0.252	8.69883e-69	0
Kmt2b	4.11964e-73	0.870376	0.139	0.294	8.80202e-69	0
Tia1	1.08496e-72	0.426876	0.342	0.679	2.31812e-68	0
Gnptg	1.28419e-72	0.786302	0.157	0.323	2.7438e-68	0
Ncapd3	1.98868e-72	0.866053	0.153	0.317	4.24901e-68	0
Mbnl1	2.64282e-72	0.89943	0.161	0.331	5.64665e-68	0
Gcc2	6.85669e-72	0.827423	0.169	0.345	1.465e-67	0
Kif3a	2.22896e-71	0.762675	0.255	0.507	4.7624e-67	0
R3hdm2	3.59587e-71	0.782638	0.252	0.501	7.68293e-67	0
Tfrc	1.06532e-70	0.650361	0.14	0.29	2.27616e-66	0
Ppp6r3	1.6333e-70	0.96198	0.158	0.324	3.4897e-66	0
Rbfox3	3.4476e-70	1.1679	0.526	0.64	7.36614e-66	0
Arl6ip5	3.78281e-70	0.731759	0.22	0.435	8.08236e-66	0
Mia2	5.67341e-70	0.947517	0.182	0.367	1.21218e-65	0
Mbtps1	5.90832e-70	0.923144	0.118	0.254	1.26237e-65	0
Nfx1	2.05076e-69	0.960115	0.144	0.299	4.38166e-65	0
Cdk16	3.94042e-69	0.892958	0.183	0.367	8.4191e-65	0
Cpsf7	7.704e-69	1.01521	0.145	0.299	1.64604e-64	0
Clk4	1.00912e-68	0.990501	0.155	0.318	2.15609e-64	0
Cep350	1.28162e-68	1.02353	0.127	0.27	2.73831e-64	0
Tet3	1.28886e-68	0.93864	0.191	0.383	2.75378e-64	0
Npdc1	1.44215e-68	0.60654	0.276	0.537	3.0813e-64	0
Khdc4	1.95486e-68	0.892452	0.119	0.255	4.17676e-64	0
Gnb5	2.03351e-68	0.601979	0.128	0.269	4.34479e-64	0
Chd6	2.26172e-68	0.74194	0.262	0.514	4.83238e-64	0
Celf4	4.73015e-68	0.832406	0.572	0.649	1.01064e-63	0
Bmp1	5.52099e-68	1.97193	0.296	0.247	1.17961e-63	0
Ube2o	1.62914e-67	0.898944	0.125	0.263	3.48082e-63	0
Braf	2.9762e-67	0.922611	0.134	0.278	6.35895e-63	0
Kif5c	4.02689e-67	0.855143	0.589	0.747	8.60385e-63	0
Gde1	4.69574e-67	0.795733	0.227	0.446	1.00329e-62	0
Tmem106b	1.02771e-66	0.715259	0.122	0.257	2.1958e-62	0
Mprip	1.17282e-66	0.786534	0.266	0.523	2.50586e-62	0
Kdm6a	1.24352e-66	0.917374	0.12	0.255	2.65691e-62	0
Gripap1	1.39105e-66	0.925766	0.186	0.37	2.97213e-62	0
Zranb1	2.48742e-66	0.859845	0.231	0.453	5.31461e-62	0
Helz	5.008e-66	0.914107	0.156	0.315	1.07001e-61	0
Cadm2	7.12069e-66	1.32027	0.339	0.294	1.52141e-61	0
Map3k4	7.97813e-66	0.956446	0.118	0.25	1.70461e-61	0
Fgd4	1.07163e-65	0.855175	0.176	0.349	2.28964e-61	0
mt-Nd3	2.24296e-65	1.11934	0.542	0.704	4.7923e-61	0
Pafah1b1	7.83801e-65	0.257674	0.404	0.779	1.67467e-60	0
Mphosph9	4.52641e-64	1.06007	0.128	0.265	9.67113e-60	0
Mdm4	8.96682e-64	0.941049	0.178	0.351	1.91585e-59	0
Ate1	1.46237e-63	0.958672	0.177	0.35	3.1245e-59	0
Sorbs1	3.00378e-63	0.801453	0.13	0.266	6.41787e-59	0
Celf1	1.03711e-62	0.733828	0.301	0.59	2.21588e-58	0
Mysm1	1.73308e-62	0.980855	0.165	0.327	3.7029e-58	0
Raph1	1.08562e-61	0.861625	0.133	0.27	2.31954e-57	0
Fam49b	1.42159e-61	0.905925	0.215	0.417	3.03737e-57	0
Mapk8ip1	1.65644e-61	0.725355	0.26	0.5	3.53915e-57	0
Huwe1	2.72421e-61	0.675902	0.303	0.591	5.82054e-57	0
Myt1l	4.41122e-61	0.416262	0.156	0.302	9.42502e-57	0
Med13l	6.9468e-61	1.07461	0.143	0.288	1.48425e-56	0
Tgoln1	1.00687e-60	0.822134	0.123	0.252	2.15129e-56	0
Tut4	1.26395e-60	0.728219	0.292	0.567	2.70055e-56	0
Atp6v0a1	2.24782e-60	1.66173	0.372	0.371	4.80269e-56	0
Klf13	4.53219e-60	0.65423	0.282	0.538	9.68348e-56	0
Lrrc4b	4.94646e-60	0.725989	0.137	0.273	1.05686e-55	0
Pcbp4	5.24002e-60	0.302258	0.388	0.739	1.11958e-55	0
Nfic	5.8904e-60	0.74513	0.246	0.47	1.25854e-55	0
Trip11	1.0296e-59	1.0104	0.164	0.321	2.19983e-55	0
Tigd2	1.77485e-59	0.900014	0.15	0.297	3.79214e-55	0
Kmt2c	2.3102e-59	0.850795	0.259	0.496	4.93598e-55	0
Nup98	3.07797e-59	0.9547	0.125	0.255	6.5764e-55	0
Clstn1	3.44725e-59	1.34966	0.463	0.54	7.36538e-55	0
Snhg20	5.07216e-59	0.928058	0.136	0.273	1.08372e-54	0
Mtch2	7.02786e-59	0.772251	0.289	0.558	1.50157e-54	0
Synj2bp	7.32837e-59	0.983063	0.157	0.309	1.56578e-54	0
U2surp	7.6545e-59	0.547334	0.352	0.687	1.63546e-54	0
Plcb4	2.54337e-58	1.65626	0.357	0.346	5.43417e-54	0
Gm3764	3.33102e-58	0.377904	0.171	0.322	7.11706e-54	0
Xist	6.41796e-58	0.254731	0.82	0.957	1.37126e-53	0
Cd47	7.20766e-58	0.765747	0.539	0.621	1.53999e-53	0
Fbxl5	7.28348e-58	0.980878	0.124	0.251	1.55619e-53	0
Rprd2	9.28961e-58	1.06045	0.129	0.259	1.98482e-53	0
Mapre2	1.3159e-57	0.74341	0.153	0.298	2.81155e-53	0
Gm2694	1.97592e-57	1.0024	0.493	0.542	4.22174e-53	0
Itfg1	2.26811e-56	0.884077	0.141	0.277	4.84604e-52	0
Cdc7	3.00899e-56	0.958227	0.133	0.263	6.42901e-52	0
Mapk10	3.07724e-56	0.701816	0.139	0.273	6.57483e-52	0
Necab3	5.05747e-56	0.350005	0.206	0.375	1.08058e-51	0
Ccdc47	1.76731e-55	0.784304	0.256	0.482	3.77604e-51	0
Cnr1	6.8212e-55	1.31135	0.437	0.471	1.45742e-50	0
Crebzf	8.28507e-55	0.909248	0.22	0.414	1.77019e-50	0
Sptan1	1.01412e-54	1.24837	0.491	0.601	2.16677e-50	0
Bptf	1.65276e-54	0.734422	0.307	0.587	3.53129e-50	0
Tacc1	2.71121e-54	0.995558	0.13	0.257	5.79277e-50	0
Dlg4	5.07944e-54	0.949113	0.148	0.286	1.08527e-49	0
Git2	6.05755e-54	0.933214	0.225	0.422	1.29426e-49	0
Camta1	1.17967e-53	0.643307	0.331	0.634	2.52049e-49	0
Ddx17	1.26795e-53	0.546274	0.344	0.652	2.7091e-49	0
Slc22a17	1.50534e-53	1.28881	0.471	0.564	3.2163e-49	0
Map7d1	2.50483e-53	1.00972	0.219	0.413	5.35182e-49	0
Ski	5.78342e-53	0.999078	0.175	0.332	1.23568e-48	0
Slc50a1	1.54632e-52	0.93227	0.128	0.252	3.30386e-48	0
Ogfrl1	1.80743e-52	0.714001	0.159	0.298	3.86176e-48	0
Prpf38b	6.15861e-52	0.946877	0.267	0.505	1.31585e-47	0
Dctn1	1.10268e-50	0.845717	0.195	0.363	2.35598e-46	0
Nsd1	1.58587e-50	0.548753	0.364	0.697	3.38837e-46	0
Neurod2	3.0263e-50	0.531402	0.158	0.292	6.46598e-46	0
Mapk8ip2	5.54319e-50	0.868903	0.165	0.31	1.18436e-45	0
Tm9sf2	4.23272e-49	0.951497	0.167	0.312	9.04364e-45	0
Gphn	5.78448e-49	0.995813	0.164	0.307	1.23591e-44	0
Tnik	6.68599e-49	0.451917	0.263	0.467	1.42853e-44	0
Auts2	8.50327e-49	0.933394	0.546	0.725	1.81681e-44	0
Stag1	1.38028e-48	0.862218	0.262	0.486	2.94911e-44	0
Dnajb14	1.40624e-48	0.980674	0.138	0.263	3.00457e-44	0
Maml3	1.99574e-48	0.856474	0.195	0.359	4.2641e-44	0
Mga	2.69665e-48	1.05875	0.195	0.362	5.76165e-44	0
Agap3	8.89633e-48	1.0294	0.171	0.318	1.90079e-43	0
Mkln1	2.06635e-47	1.05499	0.208	0.383	4.41495e-43	0
Dync1h1	2.10376e-47	0.634763	0.325	0.605	4.49489e-43	0
Nsd3	2.40686e-47	0.958651	0.259	0.481	5.1425e-43	0
Riok3	3.29291e-47	0.941177	0.225	0.413	7.03564e-43	0
Bscl2	5.38331e-47	0.920234	0.136	0.256	1.1502e-42	0
Abhd16a	7.04778e-47	1.55738	0.413	0.474	1.50583e-42	0
Dgkd	1.15467e-46	1.83389	0.295	0.269	2.46707e-42	0
Aak1	1.86826e-46	1.89003	0.326	0.319	3.99172e-42	0
Mindy2	1.93557e-46	0.732182	0.208	0.374	4.13554e-42	0
Foxn2	3.50769e-46	1.01067	0.135	0.254	7.49453e-42	0
Usp33	4.32578e-46	0.994342	0.147	0.274	9.24245e-42	0
Mau2	5.4901e-46	1.00883	0.169	0.31	1.17302e-41	0
Csnk1g1	1.0474e-45	0.961173	0.162	0.298	2.23787e-41	0
Ctsd	1.64141e-45	0.282807	0.172	0.31	3.50704e-41	0
Dpysl4	2.66023e-45	0.604996	0.296	0.538	5.68385e-41	0
Slc38a2	4.47165e-45	0.587346	0.332	0.612	9.55413e-41	0
Tmem259	4.58943e-45	0.977981	0.172	0.314	9.80578e-41	0
Srsf11	1.60915e-44	0.397201	0.397	0.753	3.43812e-40	0
Ddx46	3.37301e-44	0.85757	0.295	0.548	7.20678e-40	0
Hspa4l	6.61866e-44	0.970557	0.154	0.283	1.41414e-39	0
Rtn3	2.24373e-42	0.390901	0.404	0.751	4.79395e-38	0
Pnmal2	2.51787e-42	0.666663	0.214	0.376	5.37968e-38	0
Srsf5	2.58254e-42	0.257523	0.433	0.808	5.51786e-38	0
Hipk1	3.36719e-42	1.10058	0.159	0.291	7.19433e-38	0
Nvl	3.62381e-42	1.1894	0.163	0.297	7.74264e-38	0
Tiam1	4.94876e-42	1.87461	0.261	0.228	1.05735e-37	0
Itm2b	6.17905e-42	0.366339	0.741	0.921	1.32022e-37	0
Ube3a	1.05205e-41	1.10687	0.527	0.738	2.24781e-37	0
Dmxl1	1.46324e-41	1.08334	0.187	0.336	3.12636e-37	0
Hif1a	1.67763e-41	0.897292	0.274	0.498	3.58443e-37	0
Frrs1l	5.67466e-41	1.45198	0.356	0.365	1.21245e-36	0
Arglu1	7.18439e-41	0.450572	0.392	0.736	1.53502e-36	0
Ccnl1	9.39431e-41	0.899407	0.289	0.527	2.00719e-36	0
Tial1	1.51456e-40	1.04508	0.248	0.447	3.23602e-36	0
Nbeal1	1.77531e-40	1.1183	0.14	0.255	3.79312e-36	0
Bsg	2.19467e-40	0.350776	0.612	0.867	4.68912e-36	0
Clock	2.32271e-40	1.02075	0.16	0.288	4.96271e-36	0
Fry	2.82921e-40	1.65498	0.325	0.321	6.04489e-36	0
BC005561	3.37077e-40	0.757821	0.316	0.576	7.20199e-36	0
Glg1	3.76897e-40	0.918314	0.24	0.428	8.05278e-36	0
Ap3d1	9.07832e-40	1.10191	0.156	0.28	1.93967e-35	0
Usp34	2.09893e-39	0.887339	0.301	0.549	4.48457e-35	0
Gigyf1	3.16178e-39	1.14127	0.148	0.267	6.75547e-35	0
Pcca	5.34786e-39	1.94315	0.257	0.229	1.14262e-34	0
Psd3	6.96743e-39	1.34271	0.352	0.352	1.48866e-34	0
Cntnap1	8.81073e-39	1.97436	0.286	0.271	1.8825e-34	0
Ash1l	1.04137e-38	0.914162	0.293	0.533	2.225e-34	0
Tasor	1.25565e-38	1.03792	0.169	0.3	2.68281e-34	0
Syt11	1.27875e-38	0.345451	0.396	0.7	2.73217e-34	0
Sptbn1	2.28136e-38	0.98213	0.508	0.651	4.87435e-34	0
Tnrc6a	2.30438e-38	1.07406	0.258	0.464	4.92354e-34	0
Esco1	3.92436e-38	1.0814	0.143	0.257	8.38479e-34	0
Tmem163	5.50349e-38	0.653936	0.232	0.405	1.17588e-33	0
Zbtb7a	9.00252e-38	1.05944	0.153	0.273	1.92348e-33	0
Entr1	1.19557e-37	1.29968	0.151	0.27	2.55445e-33	0
Birc6	2.02667e-37	0.982632	0.281	0.507	4.33019e-33	0
Arhgap17	2.3515e-37	1.05499	0.154	0.272	5.02422e-33	0
Ttc19	2.41548e-37	0.81321	0.233	0.406	5.16091e-33	0
Sfswap	2.6782e-37	1.29626	0.174	0.309	5.72224e-33	0
Fnbp4	5.08192e-37	1.21236	0.192	0.338	1.0858e-32	0
Camk4	1.09361e-36	1.32163	0.252	0.213	2.33661e-32	0
Clip1	1.98816e-36	1.84817	0.259	0.233	4.24789e-32	0
Zmiz1	2.07592e-36	0.794345	0.303	0.543	4.4354e-32	0
Micu1	3.03625e-36	1.29012	0.142	0.254	6.48726e-32	0
Dleu2	6.61693e-36	1.06047	0.197	0.344	1.41377e-31	0
Zranb2	8.93034e-36	1.08221	0.509	0.718	1.90806e-31	0
Snrk	1.14054e-35	1.52023	0.312	0.303	2.43687e-31	0
Ssbp4	1.77972e-35	0.939738	0.153	0.267	3.80256e-31	0
Usp48	1.85137e-35	1.24269	0.156	0.275	3.95563e-31	0
Myo9a	2.25985e-35	1.13112	0.183	0.319	4.8284e-31	0
Ttc3	2.37597e-35	0.502138	0.64	0.871	5.0765e-31	0
Pnn	2.50817e-35	0.353281	0.416	0.764	5.35895e-31	0
Epb41l1	4.48741e-35	1.60141	0.301	0.293	9.5878e-31	0
Dock4	4.58057e-34	1.68677	0.355	0.387	9.78684e-30	0
Ecpas	5.40636e-34	1.24255	0.16	0.279	1.15512e-29	0
Zmynd8	9.6415e-34	0.907344	0.251	0.433	2.06e-29	0
Ubn2	9.85554e-34	1.04381	0.263	0.463	2.10574e-29	0
Xrn1	1.09143e-33	1.19374	0.172	0.299	2.33195e-29	0
Safb2	1.55589e-33	1.23701	0.198	0.343	3.32432e-29	0
Ankhd1	3.22856e-33	1.3633	0.147	0.257	6.89814e-29	0
Mia3	7.98076e-33	1.03069	0.221	0.38	1.70517e-28	0
Trim2	8.81698e-33	1.05037	0.226	0.39	1.88384e-28	0
Trpm7	1.15003e-32	1.19319	0.178	0.307	2.45714e-28	0
Ncam1	1.44852e-32	0.417264	0.638	0.861	3.09491e-28	0
Reln	2.217e-32	1.03044	0.47	0.584	4.73684e-28	0
Vps37a	3.29737e-32	1.15991	0.154	0.266	7.04516e-28	0
Ankrd12	4.88766e-32	0.692413	0.296	0.507	1.0443e-27	0
Ndfip1	8.0405e-32	0.276134	0.461	0.807	1.71793e-27	0
Cpe	4.05096e-31	0.867415	0.529	0.713	8.65527e-27	0
Gria4	5.86924e-31	1.2558	0.347	0.359	1.25402e-26	0
Cabin1	4.69725e-30	1.22976	0.161	0.274	1.00361e-25	0
Smg6	5.33003e-30	1.20952	0.174	0.296	1.13881e-25	0
En2	8.43554e-30	0.990069	0.221	0.374	1.80234e-25	0
Golga4	9.82038e-30	1.30433	0.188	0.319	2.09822e-25	0
Rsrp1	1.10804e-29	0.6422	0.594	0.846	2.36745e-25	0
Tmem30a	1.84178e-29	1.02633	0.249	0.426	3.93514e-25	0
Tulp4	3.01484e-29	1.07162	0.5	0.683	6.4415e-25	0
Nrd1	3.19281e-29	1.08948	0.248	0.426	6.82175e-25	0
Zfpm2	3.2601e-29	0.409883	0.17	0.276	6.96554e-25	0
Ntrk2	4.16842e-29	1.15894	0.304	0.29	8.90625e-25	0
Cnksr2	4.43105e-29	1.60492	0.316	0.326	9.46738e-25	0
Usp19	6.29805e-29	1.08245	0.217	0.366	1.34564e-24	0
Zfp445	9.20996e-29	1.14772	0.237	0.403	1.9678e-24	0
Nrip1	1.15153e-28	1.12295	0.194	0.326	2.46035e-24	0
Cacna2d1	1.75858e-28	0.466997	0.376	0.651	3.75737e-24	0
Map2	3.12172e-28	0.338393	0.422	0.716	6.66987e-24	0
Rufy3	2.1146e-27	0.545821	0.38	0.67	4.51806e-23	0
Luc7l2	2.91279e-27	0.892175	0.534	0.778	6.22348e-23	0
Pan3	3.04589e-27	1.99238	0.284	0.287	6.50784e-23	0
Atp6ap1	4.23047e-27	0.945569	0.186	0.306	9.03883e-23	0
Kcnk1	6.86698e-27	0.970225	0.471	0.588	1.4672e-22	0
Smarca2	1.34573e-26	1.00755	0.252	0.425	2.87529e-22	0
Nrep	3.01771e-26	0.256822	0.436	0.7	6.44764e-22	0
Ubr3	3.05738e-26	1.12563	0.158	0.262	6.53241e-22	0
Rb1cc1	4.01975e-26	1.10028	0.266	0.453	8.5886e-22	0
D5Ertd579e	4.20884e-26	1.15667	0.202	0.334	8.99261e-22	0
Nudcd3	1.8997e-25	1.07604	0.268	0.457	4.0589e-21	0
Sept3	1.95307e-25	0.748296	0.544	0.716	4.17294e-21	0
Rundc3a	2.1287e-25	0.927714	0.311	0.539	4.54818e-21	0
Scn8a	5.17621e-25	1.66155	0.326	0.353	1.10595e-20	0
Mapk8ip3	2.92103e-24	1.0464	0.205	0.336	6.24107e-20	0
Prpf4b	7.33831e-24	1.21106	0.468	0.646	1.5679e-19	0
Ddx5	7.74138e-24	0.255	0.828	0.958	1.65402e-19	0
Neto2	1.02875e-23	1.11329	0.166	0.27	2.19804e-19	0
Mtcl1	1.22942e-23	1.80901	0.284	0.291	2.62677e-19	0
Dnm1l	1.51344e-23	1.15994	0.22	0.362	3.23363e-19	0
D430041D05Rik	5.72445e-23	0.646394	0.346	0.584	1.22309e-18	0
Chfr	5.9616e-23	1.21662	0.16	0.258	1.27376e-18	0
Ccnl2	1.00612e-22	1.37236	0.438	0.583	2.14967e-18	0
Rabac1	1.40163e-22	0.728476	0.355	0.611	2.99471e-18	0
Cntn1	3.92977e-22	0.906831	0.304	0.294	8.39636e-18	0
Erc1	4.60048e-22	1.55687	0.324	0.352	9.82939e-18	0
Rnf130	1.23813e-21	1.05453	0.247	0.402	2.64539e-17	0
Lnpep	1.26603e-21	1.74796	0.285	0.294	2.70499e-17	0
Nell2	1.38891e-21	0.847779	0.225	0.358	2.96754e-17	0
Atp6v0c	2.83739e-21	0.455898	0.638	0.893	6.06237e-17	0
Galnt11	4.08404e-21	1.28272	0.169	0.271	8.72597e-17	0
Samd14	5.02115e-21	0.972624	0.161	0.255	1.07282e-16	0
Ktn1	5.31921e-21	0.795985	0.356	0.617	1.1365e-16	0
Atp9a	6.15313e-21	1.50019	0.285	0.291	1.31468e-16	0
Ttc14	6.7939e-21	1.30226	0.441	0.591	1.45158e-16	0
Cdc42bpa	7.66169e-21	1.67892	0.336	0.382	1.637e-16	0
Odf2	1.22887e-20	1.72459	0.318	0.351	2.6256e-16	0
Cdc37l1	1.28993e-20	1.12065	0.263	0.435	2.75606e-16	0
Usp15	4.15367e-20	1.21099	0.231	0.373	8.87473e-16	0
Tspan5	4.34152e-20	1.08789	0.217	0.347	9.27609e-16	0
Nap1l5	7.46184e-20	0.296302	0.182	0.268	1.5943e-15	0
Hivep2	8.07518e-20	1.50453	0.298	0.315	1.72534e-15	0
Kmt2a	8.81735e-20	1.01346	0.33	0.565	1.88392e-15	0
Atp11b	2.05816e-19	1.30711	0.163	0.258	4.39746e-15	0
Myo5a	2.32164e-19	1.19985	0.197	0.314	4.96041e-15	0
Jarid2	3.3041e-19	0.939778	0.311	0.52	7.05954e-15	0
Retreg2	1.37408e-18	1.28096	0.169	0.267	2.93585e-14	0
Etnk1	1.98815e-18	1.12371	0.265	0.431	4.24789e-14	0
Trio	5.85977e-18	1.24253	0.223	0.354	1.252e-13	0
Prpf39	2.40633e-17	1.27094	0.212	0.334	5.14136e-13	0
Rev3l	3.78272e-17	1.08461	0.232	0.364	8.08216e-13	0
Syn2	4.49776e-17	0.691795	0.27	0.414	9.60992e-13	0
Scrn1	1.71809e-16	0.89363	0.169	0.257	3.67087e-12	0
Shprh	1.92185e-16	1.26739	0.173	0.268	4.10622e-12	0
Usp3	1.97116e-16	1.85741	0.301	0.336	4.21158e-12	0
Grk2	2.36948e-16	1.19665	0.188	0.291	5.06262e-12	0
Itm2c	9.77751e-16	0.863912	0.224	0.341	2.08906e-11	0
Mef2a	2.73742e-15	1.08363	0.241	0.377	5.84876e-11	0
Rif1	4.72811e-15	1.70026	0.351	0.43	1.01021e-10	0
Cspp1	5.39618e-15	1.10476	0.28	0.446	1.15295e-10	0
Abcc5	7.91573e-15	1.47704	0.35	0.419	1.69128e-10	0
Mbnl2	2.01342e-14	0.698374	0.306	0.474	4.30187e-10	0
Ppfia1	5.01007e-14	1.42749	0.184	0.28	1.07045e-09	0
Ubr2	1.46263e-13	1.36611	0.168	0.253	3.12505e-09	0
Nedd4l	3.57491e-13	1.08494	0.269	0.421	7.63816e-09	0
Magi2	3.6709e-13	1.32353	0.174	0.26	7.84325e-09	0
Rbm5	3.73693e-13	0.932392	0.353	0.587	7.98432e-09	0
Tm9sf4	3.98898e-13	1.14415	0.245	0.377	8.52286e-09	0
Ddhd2	1.76029e-12	1.2039	0.231	0.353	3.76103e-08	0
Srrm4	2.19021e-12	0.955226	0.309	0.49	4.67959e-08	0
Zdhhc17	2.28269e-12	1.63315	0.282	0.31	4.8772e-08	0
Dop1a	3.14574e-12	1.22168	0.175	0.258	6.7212e-08	0
Nsf	4.14783e-12	0.869044	0.224	0.329	8.86224e-08	0
Nrcam	5.19139e-12	0.793088	0.303	0.466	1.10919e-07	0
Stxbp1	5.38204e-12	1.10335	0.405	0.512	1.14993e-07	0
Micu3	6.38149e-12	0.884246	0.259	0.389	1.36347e-07	0
Gabrb3	1.58029e-11	1.53026	0.25	0.262	3.37646e-07	0
Ralgapa1	1.99413e-11	1.33611	0.218	0.328	4.26067e-07	0
Tmx4	2.35691e-10	0.819861	0.362	0.585	5.03577e-06	0
Tcf25	2.55673e-10	0.711502	0.417	0.715	5.46272e-06	0
Lsamp	2.85246e-10	0.905808	0.368	0.432	6.09458e-06	0
Pgm2l1	3.68936e-10	1.15862	0.178	0.257	7.88269e-06	0
Dclk1	4.74495e-10	0.748969	0.296	0.441	1.01381e-05	0
Hectd4	7.07369e-10	1.6326	0.265	0.292	1.51136e-05	0
Pde4d	1.18744e-09	0.90734	0.216	0.311	2.53709e-05	0
Rbm33	1.30995e-09	1.3346	0.238	0.357	2.79884e-05	0
Fut8	1.96869e-09	1.24899	0.392	0.518	4.2063e-05	0
Tmem178	2.12154e-09	1.10098	0.282	0.434	4.53288e-05	0
Dmxl2	3.88057e-09	1.66921	0.248	0.268	8.29123e-05	0
Capn15	9.95734e-09	1.48315	0.175	0.25	0.000212749	0
Dot1l	1.10373e-08	1.76561	0.304	0.363	0.000235824	0
Tnrc6b	1.11728e-08	1.01077	0.351	0.572	0.000238717	0
Fbxw7	1.79602e-08	1.2505	0.227	0.332	0.000383737	0
Pacsin1	4.09811e-08	1.23131	0.267	0.291	0.000875601	0
Stx1b	4.78693e-08	0.830649	0.197	0.274	0.00102277	0
Tnrc6c	4.9486e-08	1.02152	0.337	0.531	0.00105732	0
Gm26917	5.60858e-08	0.876715	0.314	0.478	0.00119833	0
Ncoa7	6.32312e-08	1.24421	0.239	0.35	0.001351	0
Adgrb3	2.49052e-07	1.09881	0.259	0.378	0.00532124	0
Arhgef7	2.4979e-07	1.47741	0.331	0.411	0.00533701	0
Baiap2	2.76339e-07	1.26865	0.183	0.256	0.00590427	0
Akap11	3.79978e-07	1.22848	0.238	0.346	0.00811861	0
Fut9	4.38539e-07	1.06921	0.285	0.426	0.00936983	0
Cyfip2	6.40708e-07	1.07194	0.187	0.26	0.0136894	0
Kif1a	6.85167e-07	1.3195	0.321	0.39	0.0146393	0
Oxr1	1.1543e-06	1.74219	0.237	0.261	0.0246627	0
Akap8l	2.48558e-06	1.73684	0.249	0.28	0.0531068	0
Pcmtd2	2.77762e-06	1.44511	0.181	0.251	0.0593466	0
Herc1	2.84284e-06	1.38039	0.368	0.489	0.06074	0
Ice1	2.99167e-06	1.37701	0.243	0.352	0.06392	0
Dusp11	4.28725e-06	1.4282	0.371	0.504	0.0916014	0
Sv2b	8.86033e-06	1.24281	0.343	0.433	0.18931	0
Mpp7	9.44122e-06	1.59667	0.235	0.26	0.201721	0
Synpr	1.44727e-05	0.778724	0.205	0.274	0.309225	0
Nav2	2.15502e-05	0.634254	0.389	0.596	0.460442	0
Tef	2.4531e-05	1.6708	0.231	0.257	0.524129	0
Sh3glb2	4.19077e-05	1.34854	0.211	0.293	0.895401	0
Cadps	4.44274e-05	0.854493	0.299	0.428	0.949235	0
Zcchc7	4.91859e-05	1.51213	0.312	0.388	1	0
Chka	5.55745e-05	1.74781	0.252	0.292	1	0
R3hdm1	6.06855e-05	1.02417	0.373	0.599	1	0
Rbm25	8.20613e-05	0.746059	0.434	0.731	1	0
Sh3gl2	8.88908e-05	0.810286	0.315	0.451	1	0
Dixdc1	0.000102384	1.28599	0.265	0.384	1	0
Pcyt2	0.000102468	1.53392	0.227	0.251	1	0
Hsp90b1	0.000127936	0.27988	0.526	0.825	1	0
Atp6ap2	0.000153743	1.13507	0.406	0.569	1	0
Nbea	0.000164179	0.833253	0.364	0.551	1	0
Clasp2	0.000172908	1.16839	0.284	0.411	1	0
Ppp6r2	0.000195814	1.64382	0.241	0.276	1	0
Mmp24	0.000379836	1.04163	0.199	0.264	1	0
Atrx	0.000468616	0.416673	0.495	0.809	1	0
Leng8	0.000513493	1.23875	0.359	0.478	1	0
Phf20l1	0.000574194	0.886387	0.391	0.617	1	0
Rock2	0.000772951	1.25545	0.354	0.466	1	0
Adgrl3	0.000948848	0.919361	0.244	0.327	1	0
Gabbr1	0.000971964	1.11885	0.36	0.474	1	0
Pak1	0.00142794	0.893859	0.215	0.282	1	0
Prnp	0.0016124	0.894665	0.314	0.448	1	0
Sec62	0.00179247	0.921691	0.455	0.679	1	0
Map1a	0.00182159	1.31685	0.269	0.319	1	0
4932438A13Rik	0.00251744	1.47196	0.274	0.331	1	0
Agtpbp1	0.00267546	1.10887	0.301	0.433	1	0
Prkce	0.00277334	1.18877	0.233	0.262	1	0
Htt	0.00450587	1.49482	0.2	0.266	1	0
Arhgap21	0.00458072	1.39672	0.281	0.404	1	0
Dnmt3a	0.0051003	1.40521	0.221	0.298	1	0
Srgap3	0.00524473	1.42772	0.229	0.262	1	0
Ctsb	0.00616636	1.02122	0.278	0.388	1	0
Peg3	0.00716848	1.27053	0.371	0.514	1	0
St3gal5	0.0082788	1.42081	0.297	0.374	1	0
Chd7	0.00892098	0.772545	0.481	0.737	1	0
Mapt	0.00919471	0.924123	0.341	0.43	1	0
Nhlh1	0	2.87666	0.805	0.199	0	1
Dpysl3	0	1.98469	0.833	0.263	0	1
Dcx	0	1.93709	0.925	0.393	0	1
Nhlh2	0	2.21616	0.882	0.352	0	1
Tex14	0	2.87619	0.661	0.145	0	1
Stmn4	0	1.39944	0.837	0.323	0	1
Igfbpl1	0	1.89991	0.989	0.496	0	1
Btbd17	0	1.48014	0.801	0.31	0	1
Clmp	0	1.95386	0.77	0.279	0	1
Sox11	0	2.12279	0.99	0.512	0	1
Cd24a	0	1.5109	0.903	0.439	0	1
Elavl2	0	1.77408	0.842	0.379	0	1
Elavl4	0	1.69447	0.824	0.361	0	1
Cntn2	0	1.46727	0.975	0.514	0	1
Dbn1	0	1.3737	0.858	0.401	0	1
Cog7	0	1.36586	0.927	0.471	0	1
Miat	0	1.31776	0.897	0.441	0	1
Marcksl1	0	1.56842	0.957	0.51	0	1
Tubb3	0	2.68475	0.992	0.545	0	1
Ina	0	1.70552	0.941	0.495	0	1
Ctxn1	0	1.7633	0.785	0.342	0	1
Sema6a	0	1.37747	0.784	0.341	0	1
Mllt11	0	1.48433	0.855	0.415	0	1
Ppp1r14c	0	1.72576	0.897	0.46	0	1
Gap43	0	2.03484	0.957	0.52	0	1
Pdzrn3	0	2.67945	0.539	0.105	0	1
Cnih2	0	1.83341	0.647	0.213	0	1
Nnat	0	1.9457	0.979	0.546	0	1
Kif21b	0	1.94109	0.608	0.178	0	1
Sox4	0	1.45829	0.957	0.527	0	1
Scrt2	0	2.34156	0.572	0.143	0	1
Tubb2a	0	1.24357	0.914	0.487	0	1
Plppr1	0	2.33528	0.546	0.122	0	1
Tmeff1	0	1.66264	0.717	0.297	0	1
Scrt1	0	1.40129	0.715	0.296	0	1
Dcc	0	1.8604	0.724	0.306	0	1
Cdk5r1	0	1.43512	0.769	0.352	0	1
Afap1	0	1.67166	0.73	0.314	0	1
St18	0	1.41804	0.707	0.294	0	1
Ccnd2	0	0.782569	0.869	0.456	0	1
Ppp1r14b	0	0.683052	0.98	0.568	0	1
Sobp	0	1.47058	0.783	0.375	0	1
Insm1	0	0.825849	0.817	0.409	0	1
Samd12	0	1.75333	0.576	0.175	0	1
6330403K07Rik	0	1.96452	0.595	0.195	0	1
Chrna3	0	2.77339	0.475	0.076	0	1
Sept4	0	0.852952	0.723	0.325	0	1
Gng3	0	1.11297	0.83	0.432	0	1
Nav1	0	1.26679	0.886	0.491	0	1
Fabp5	0	1.58352	0.98	0.585	0	1
Uchl1	0	1.40806	0.758	0.364	0	1
Rab3a	0	0.771913	0.885	0.491	0	1
Jpt1	0	1.45308	0.976	0.583	0	1
Ppp2r2b	0	1.91195	0.583	0.19	0	1
Hist3h2ba	0	1.48114	0.887	0.495	0	1
Gng2	0	1.46048	0.792	0.4	0	1
Serf1	0	1.54181	0.773	0.383	0	1
Hmgb3	0	0.549576	0.874	0.484	0	1
Necab31	0	0.959568	0.685	0.298	0	1
Ebf3	0	1.98163	0.616	0.229	0	1
Itsn1	0	1.16577	0.773	0.389	0	1
Mvd	0	1.84617	0.557	0.174	0	1
Cdk4	0	0.584837	0.909	0.526	0	1
Frmd4a	0	1.20853	0.768	0.387	0	1
Apc2	0	0.885214	0.603	0.222	0	1
Hist3h2a	0	1.69611	0.619	0.238	0	1
Plppr3	0	1.23727	0.549	0.171	0	1
4930578M01Rik	0	1.29174	0.658	0.282	0	1
Ddah2	0	1.86909	0.984	0.608	0	1
Barhl1	0	1.13137	0.743	0.369	0	1
Nova2	0	1.43555	0.655	0.281	0	1
Nt5dc2	0	1.3759	0.761	0.388	0	1
Trpc4ap1	0	1.13508	0.777	0.405	0	1
Tubb2b	0	2.15415	0.996	0.624	0	1
Uncx	0	1.06988	0.841	0.473	0	1
Cd9	0	0.542638	0.924	0.556	0	1
Hmgcs1	0	1.38649	0.78	0.415	0	1
Basp1	0	2.06553	0.996	0.631	0	1
Sbk1	0	1.44212	0.627	0.263	0	1
Kdm5b	0	1.00942	0.697	0.333	0	1
Mex3a	0	1.26327	0.724	0.361	0	1
Grin2b	0	0.551108	0.579	0.216	0	1
Apc	0	1.19424	0.91	0.547	0	1
Pafah1b3	0	1.39341	0.734	0.372	0	1
Bhlhe22	0	1.56449	0.599	0.239	0	1
Hnrnpab	0	0.542523	0.921	0.562	0	1
Plcb1	0	1.26567	0.592	0.235	0	1
Fnbp1l	0	1.10019	0.747	0.39	0	1
E130114P18Rik	0	1.38316	0.724	0.367	0	1
Rbfox2	0	0.979534	0.823	0.467	0	1
Idh1	0	1.67733	0.586	0.231	0	1
Nsg2	0	0.973074	0.811	0.457	0	1
Nav21	0	0.870817	0.872	0.519	0	1
H2afy2	0	1.16878	0.768	0.416	0	1
Ldhb	0	0.954896	0.83	0.478	0	1
Celf3	0	1.27469	0.524	0.173	0	1
Myt1	0	1.29868	0.518	0.171	0	1
Cd63	0	0.587734	0.95	0.603	0	1
Crmp1	0	0.932425	0.946	0.602	0	1
Rab6b	0	0.884208	0.815	0.472	0	1
Aplp1	0	0.40239	0.721	0.382	0	1
Clic1	0	1.35464	0.8	0.463	0	1
Rnf165	0	1.2679	0.652	0.315	0	1
Pde1c	0	1.44619	0.691	0.357	0	1
Fdps	0	1.24509	0.771	0.439	0	1
Mapre1	0	0.91864	0.835	0.503	0	1
Gm1673	0	1.06819	0.926	0.595	0	1
Elavl3	0	1.18519	0.957	0.628	0	1
Gdpd1	0	1.12123	0.645	0.318	0	1
Cirbp	0	1.00915	0.859	0.532	0	1
Shf1	0	0.622203	0.838	0.512	0	1
Rcor2	0	1.28932	0.635	0.31	0	1
Nsg1	0	0.895794	0.923	0.6	0	1
Klf7	0	0.91408	0.789	0.466	0	1
Brsk2	0	0.909881	0.658	0.336	0	1
Hnrnpa1	0	0.574653	0.971	0.649	0	1
Gabarap	0	1.15897	0.917	0.597	0	1
Myt1l1	0	0.931792	0.558	0.238	0	1
Mex3b	0	1.45884	0.586	0.266	0	1
Clvs1	0	1.09525	0.543	0.224	0	1
Prkcb	0	0.724023	0.76	0.441	0	1
Trp53i11	0	1.07355	0.686	0.368	0	1
Smarce1	0	0.900456	0.795	0.477	0	1
Ebf1	0	0.949523	0.956	0.638	0	1
Hdac2	0	0.911984	0.798	0.481	0	1
Meis1	0	0.771021	0.795	0.478	0	1
Gadd45a	0	2.15251	0.468	0.152	0	1
Eif3h	0	0.762988	0.88	0.565	0	1
Prxl2b	0	1.16799	0.694	0.379	0	1
Myl12b	0	1.03394	0.864	0.55	0	1
Maged2	0	1.39136	0.558	0.245	0	1
Scmh1	0	1.14823	0.582	0.269	0	1
Cyp51	0	0.861703	0.701	0.388	0	1
Dlgap4	0	0.985861	0.595	0.284	0	1
Thsd7a	0	1.62052	0.5	0.19	0	1
Rala	0	1.10709	0.752	0.442	0	1
Evl	0	1.08631	0.699	0.39	0	1
Dner	0	0.518137	0.546	0.238	0	1
Rnmt	0	0.961909	0.732	0.424	0	1
Podxl2	0	1.13721	0.947	0.639	0	1
Apbb1	0	0.641961	0.699	0.391	0	1
Eif3f	0	0.704947	0.85	0.542	0	1
Nrn1	0	0.695121	0.701	0.394	0	1
Cemip2	0	1.18001	0.573	0.266	0	1
Arpc3	0	0.944212	0.878	0.572	0	1
Actl6b	0	1.00581	0.51	0.204	0	1
Tnik1	0	0.434472	0.703	0.397	0	1
Dstn	0	0.889772	0.882	0.577	0	1
Lhx1	0	0.946666	0.751	0.446	0	1
Map21	0	0.952596	0.939	0.634	0	1
Dctn3	0	1.05245	0.855	0.551	0	1
Fdft1	0	1.37152	0.563	0.26	0	1
Txndc17	0	1.08827	0.722	0.42	0	1
Rnd2	0	1.28464	0.608	0.306	0	1
Prmt2	0	1.43669	0.493	0.192	0	1
Eif4a1	0	0.594027	0.961	0.66	0	1
Map1lc3b	0	1.02669	0.882	0.582	0	1
Tagln3	0	0.464571	0.834	0.534	0	1
Gnb2	0	0.878221	0.94	0.641	0	1
Eif3e	0	0.69739	0.847	0.548	0	1
Csnk1e	0	0.860028	0.779	0.481	0	1
Dpysl5	0	1.47522	0.459	0.162	0	1
Asphd2	0	1.23334	0.555	0.259	0	1
Hsbp1	0	0.970866	0.888	0.592	0	1
Ube2r2	0	1.01718	0.742	0.446	0	1
Kdm1a	0	0.768902	0.841	0.545	0	1
Prdm8	0	1.2865	0.506	0.211	0	1
Plgrkt	0	1.11702	0.64	0.345	0	1
Arpc5	0	1.076	0.725	0.43	0	1
Rtraf	0	0.648186	0.857	0.562	0	1
Arf4	0	0.767823	0.874	0.581	0	1
Tubb5	0	1.2781	0.995	0.702	0	1
Atat1	0	1.466	0.481	0.188	0	1
Cacna2d11	0	0.538759	0.865	0.573	0	1
Ptov1	0	0.704027	0.897	0.605	0	1
Zfp423	0	1.81152	0.45	0.158	0	1
Soga3	0	0.738142	0.784	0.492	0	1
Tsn	0	0.685243	0.916	0.626	0	1
Zic4	0	0.708451	0.812	0.522	0	1
2700081O15Rik	0	1.10332	0.613	0.323	0	1
Neurod1	0	1.089	0.96	0.671	0	1
Akr1a1	0	0.87917	0.804	0.516	0	1
Ptprs	0	0.969212	0.988	0.7	0	1
Pfn2	0	0.801409	0.754	0.467	0	1
Ube2e3	0	0.757888	0.895	0.609	0	1
Sh3bgrl3	0	1.07452	0.649	0.363	0	1
Tbcb	0	0.882326	0.806	0.52	0	1
Tbca	0	0.769972	0.819	0.533	0	1
Dpysl2	0	0.852333	0.831	0.545	0	1
Trappc4	0	0.960966	0.729	0.444	0	1
Mien1	0	0.9958	0.706	0.421	0	1
Sh3kbp1	0	1.65856	0.474	0.189	0	1
B3galt2	0	1.47138	0.399	0.115	0	1
H1f0	0	0.718146	0.78	0.497	0	1
Cyth2	0	0.89233	0.731	0.448	0	1
Lingo1	0	0.758203	0.596	0.313	0	1
Bin11	0	0.657542	0.728	0.445	0	1
Arpc1a	0	0.8234	0.824	0.541	0	1
Pak71	0	0.779017	0.495	0.213	0	1
Lhx1os	0	1.17327	0.575	0.293	0	1
Psma7	0	0.71131	0.93	0.649	0	1
Mpv17l2	0	1.51785	0.528	0.247	0	1
Khdrbs1	0	0.687136	0.824	0.543	0	1
Klhdc2	0	0.772357	0.801	0.521	0	1
Cep170	0	0.689824	0.747	0.467	0	1
C530008M17Rik	0	1.11011	0.605	0.325	0	1
Mkrn1	0	0.781267	0.699	0.421	0	1
Dusp81	0	0.671582	0.575	0.297	0	1
Sec61b	0	0.728516	0.812	0.536	0	1
Grcc10	0	0.785352	0.869	0.593	0	1
Gm29521	0	2.91533	0.321	0.045	0	1
Nme1	0	0.772835	0.914	0.638	0	1
Mtss1	0	0.749995	0.732	0.456	0	1
Atp6v1g1	0	0.763847	0.884	0.609	0	1
Gsk3b	0	0.881164	0.932	0.657	0	1
Mrpl34	0	0.87603	0.741	0.466	0	1
Ssbp3	0	0.684787	0.781	0.507	0	1
Rbx1	0	0.643566	0.919	0.645	0	1
Mab21l1	0	1.27854	0.497	0.224	0	1
Rufy31	0	0.551371	0.866	0.593	0	1
Klhl35	0	2.94933	0.332	0.059	0	1
Psmb6	0	0.623233	0.894	0.621	0	1
Atxn10	0	0.769454	0.776	0.503	0	1
Erbb4	0	0.786227	0.471	0.198	0	1
Pax6	0	0.575436	0.887	0.615	0	1
Mturn	0	1.4043	0.432	0.16	0	1
Sstr2	0	1.65419	0.438	0.167	0	1
Fam89b	0	1.14593	0.613	0.342	0	1
Rpl7	0	0.554052	0.961	0.691	0	1
Cyb5a	0	0.978082	0.619	0.349	0	1
Vps37b	0	0.725576	0.728	0.458	0	1
Carhsp1	0	1.17245	0.592	0.322	0	1
Atp6v0e	0	0.854751	0.729	0.459	0	1
Celf2	0	1.04578	0.978	0.71	0	1
Syt111	0	0.509841	0.889	0.621	0	1
Ywhaq	0	0.790011	0.924	0.657	0	1
Btf3	0	0.62205	0.965	0.698	0	1
Ccdc50	0	0.901725	0.673	0.407	0	1
Gm8797	0	0.65849	0.928	0.662	0	1
Ncan	0	0.895073	0.4	0.134	0	1
Ube2d1	0	1.08875	0.58	0.314	0	1
Ccdc88a	0	0.705887	0.698	0.432	0	1
Psmb4	0	0.625982	0.836	0.571	0	1
Ftl1	0	1.17903	0.985	0.72	0	1
Nxph4	0	1.99325	0.351	0.086	0	1
Gdpd5	0	1.58905	0.353	0.089	0	1
Klc1	0	0.452601	0.811	0.548	0	1
Tsc22d1	0	0.508546	0.858	0.595	0	1
Pbx1	0	0.74602	0.723	0.46	0	1
Akirin2	0	0.772175	0.688	0.425	0	1
Tox3	0	0.99777	0.599	0.336	0	1
Nr2f1	0	0.856563	0.677	0.415	0	1
Smarcd1	0	0.820474	0.696	0.434	0	1
Bax	0	0.667001	0.839	0.578	0	1
Dctn2	0	0.682641	0.85	0.589	0	1
Enho	0	0.710204	0.574	0.313	0	1
Srp14	0	0.695701	0.884	0.625	0	1
Pfdn5	0	0.586621	0.897	0.638	0	1
Eid1	0	0.665204	0.899	0.641	0	1
BC031181	0	0.67536	0.833	0.575	0	1
Apba2	0	0.709937	0.714	0.456	0	1
Ciao2b	0	0.82934	0.706	0.448	0	1
Trp53inp2	0	1.17534	0.438	0.181	0	1
Cnn3	0	0.936872	0.618	0.361	0	1
Igsf8	0	0.691949	0.724	0.467	0	1
Casp3	0	1.11002	0.56	0.304	0	1
Nfia	0	1.04415	0.988	0.732	0	1
Ubl3	0	0.738937	0.643	0.387	0	1
Rtn4	0	0.586229	0.947	0.691	0	1
Usp22	0	0.5408	0.789	0.533	0	1
Gm17750	0	1.34404	0.526	0.27	0	1
Fis1	0	0.68662	0.826	0.572	0	1
Selenow	0	0.894372	0.95	0.696	0	1
Tle5	0	0.700202	0.916	0.662	0	1
Bnip3l	0	0.747813	0.742	0.488	0	1
Map1lc3a	0	0.632443	0.885	0.632	0	1
G3bp2	0	0.64868	0.754	0.501	0	1
Pard6a	0	0.687683	0.611	0.358	0	1
Prdx2	0	1.16092	0.981	0.729	0	1
Reep3	0	0.714972	0.647	0.395	0	1
Mex3d	0	1.27226	0.505	0.253	0	1
Ywhag	0	0.55898	0.765	0.514	0	1
Cdkn1b	0	0.627649	0.801	0.55	0	1
Fzd3	0	0.665161	0.622	0.372	0	1
Scand1	0	0.669804	0.81	0.561	0	1
Slc17a6	0	0.974359	0.428	0.179	0	1
Arl8a	0	0.712659	0.586	0.338	0	1
Tsg101	0	0.873217	0.657	0.41	0	1
Smpd3	0	0.942788	0.455	0.208	0	1
Map3k13	0	1.7088	0.33	0.083	0	1
Gamt	0	0.964274	0.582	0.336	0	1
Elmo1	0	0.896355	0.406	0.162	0	1
Pnoc	0	3.51001	0.269	0.025	0	1
Acd	0	1.21947	0.478	0.234	0	1
Eif4g2	0	0.617381	0.964	0.721	0	1
Nol4	0	1.03682	0.486	0.244	0	1
Myh7b	0	2.07026	0.315	0.074	0	1
Gpc2	0	1.59273	0.354	0.113	0	1
Polr3k	0	0.86857	0.608	0.368	0	1
Pebp1	0	0.631909	0.97	0.73	0	1
Calm3	0	0.679248	0.953	0.715	0	1
Atxn7l3b	0	0.564897	0.921	0.683	0	1
Peli1	0	0.919704	0.589	0.351	0	1
Acat2	0	1.22873	0.511	0.273	0	1
Gnaq	0	0.73863	0.599	0.361	0	1
Selenok	0	0.746625	0.95	0.713	0	1
Mgat5b	0	1.06732	0.425	0.189	0	1
Pafah1b2	0	0.762384	0.693	0.457	0	1
Csnk2b	0	0.734207	0.73	0.495	0	1
Wsb2	0	0.884343	0.485	0.251	0	1
Rps9	0	0.524279	0.977	0.743	0	1
Marcks	0	0.932965	0.991	0.757	0	1
Cfl1	0	1.03337	0.985	0.752	0	1
Dnaja1	0	0.630957	0.966	0.734	0	1
Nr2f2	0	1.22959	0.453	0.223	0	1
Cotl1	0	1.33536	0.434	0.204	0	1
Smim18	0	1.54114	0.314	0.085	0	1
Midn	0	1.02873	0.515	0.287	0	1
Csrnp3	0	1.40864	0.356	0.128	0	1
Nfix	0	1.25125	0.993	0.765	0	1
Ppib	0	0.876526	0.986	0.758	0	1
S100a16	0	1.51682	0.357	0.13	0	1
Atpif1	0	0.802749	0.965	0.738	0	1
Dynll1	0	0.675649	0.971	0.744	0	1
Dusp4	0	2.25805	0.29	0.064	0	1
Vat1	0	1.69392	0.366	0.14	0	1
Kcnb2	0	1.02808	0.369	0.144	0	1
Galr1	0	2.09	0.271	0.047	0	1
Rps3	0	0.535976	0.977	0.755	0	1
Carmil2	0	0.992011	0.399	0.181	0	1
Limk1	0	1.36989	0.375	0.159	0	1
Ptms	0	0.786263	0.972	0.756	0	1
Rpl18a	0	0.517057	0.981	0.765	0	1
Sumo2	0	0.613997	0.978	0.763	0	1
Ppm1h	0	0.881823	0.346	0.134	0	1
Pou3f3	0	1.20359	0.439	0.228	0	1
Myo1b	0	1.19701	0.362	0.151	0	1
Ank31	0	0.49912	0.96	0.751	0	1
Map6	0	1.08264	0.321	0.114	0	1
Myl6	0	0.572674	0.953	0.747	0	1
Tmsb10	0	1.58756	0.989	0.784	0	1
Neurod6	0	1.63698	0.327	0.125	0	1
Gprin3	0	0.962748	0.304	0.102	0	1
Tub	0	0.945916	0.33	0.129	0	1
Lzts1	0	1.30429	0.313	0.114	0	1
Map1b	0	1.10434	0.992	0.794	0	1
Stmn2	0	1.03045	0.991	0.794	0	1
Stmn1	0	1.15278	0.997	0.806	0	1
Chchd2	0	0.624148	0.978	0.793	0	1
March1	0	1.20275	0.274	0.09	0	1
Asxl3	0	1.12766	0.293	0.111	0	1
Actg1	0	1.32831	0.996	0.816	0	1
Eef1a1	0	0.558303	0.989	0.809	0	1
Lmcd1	0	2.24367	0.272	0.096	0	1
Nacad	0	1.15663	0.256	0.085	0	1
Stmn3	0	0.509459	0.976	0.808	0	1
Calm2	0	0.626746	0.989	0.829	0	1
Zic1	0	0.654093	0.988	0.832	0	1
Gnas	0	0.644322	0.985	0.833	0	1
Eif1	0	0.43647	0.989	0.837	0	1
Hspa8	0	0.535134	0.991	0.844	0	1
Tuba1a	0	1.89242	0.999	0.859	0	1
Tcf4	0	0.861365	0.993	0.853	0	1
Nfib	0	1.21915	0.999	0.866	0	1
Ubb	0	0.391928	0.993	0.863	0	1
Actb	0	1.10401	0.997	0.868	0	1
Ptma	0	0.504501	0.998	0.882	0	1
H3f3a	0	0.794287	0.995	0.902	0	1
Rtn1	0	0.769614	0.998	0.911	0	1
Tmsb4x	0	1.77187	0.999	0.914	0	1
Ckb	0	1.13771	0.999	0.92	0	1
Hsp90ab1	0	0.627809	0.998	0.92	0	1
H3f3b	0	0.593376	0.999	0.936	0	1
Kdm6b	8.94154e-307	0.699313	0.58	0.337	1.91045e-302	1
Slc25a4	2.26496e-305	0.42673	0.979	0.808	4.83932e-301	1
Edil3	1.30381e-304	0.868426	0.327	0.135	2.78571e-300	1
Clta	1.79596e-304	0.512888	0.925	0.691	3.83725e-300	1
Hsp90aa1	3.11696e-304	0.3835	0.994	0.869	6.6597e-300	1
Ubl5	8.83474e-304	0.558451	0.882	0.637	1.88763e-299	1
Zbtb20	1.246e-303	0.549105	0.947	0.742	2.6622e-299	1
Ddr1	6.92038e-303	0.818711	0.507	0.284	1.47861e-298	1
Glrx3	1.96276e-302	0.653421	0.808	0.528	4.19362e-298	1
Cript	3.06866e-301	0.879136	0.586	0.366	6.5565e-297	1
Pik3r2	1.93067e-300	0.923807	0.422	0.207	4.12506e-296	1
Sqle	1.54317e-299	0.695687	0.563	0.33	3.29715e-295	1
Dda1	1.27591e-298	0.834101	0.572	0.35	2.72612e-294	1
Dync1i2	3.13942e-298	0.499926	0.806	0.559	6.70768e-294	1
Bzw2	3.4652e-298	0.665242	0.724	0.452	7.40375e-294	1
Bod1	8.53659e-298	0.840917	0.619	0.389	1.82393e-293	1
Dynlrb1	5.90862e-297	0.623843	0.761	0.526	1.26244e-292	1
Rpl10	5.99336e-297	0.552801	0.92	0.611	1.28054e-292	1
Ip6k2	6.9265e-295	0.786911	0.515	0.293	1.47992e-290	1
Fyn	2.14263e-294	0.604742	0.582	0.345	4.57794e-290	1
Ywhae	8.00551e-294	0.473942	0.974	0.764	1.71046e-289	1
Txnrd1	6.07705e-293	0.739784	0.676	0.426	1.29842e-288	1
Mab21l2	1.16564e-291	1.47846	0.369	0.174	2.49051e-287	1
Srrm41	1.7037e-291	0.400881	0.695	0.429	3.64014e-287	1
Hmgcr	3.87619e-291	0.536483	0.691	0.448	8.28186e-287	1
Tpmt	7.83083e-291	1.4697	0.311	0.136	1.67313e-286	1
Rpl27	2.57828e-290	0.490399	0.965	0.724	5.50875e-286	1
Psma4	8.25702e-290	0.599071	0.847	0.565	1.7642e-285	1
Bcl7a	7.86617e-289	0.64938	0.685	0.439	1.68069e-284	1
Zic2	1.29408e-288	0.521449	0.806	0.562	2.76493e-284	1
Maco1	1.65414e-287	0.472822	0.672	0.429	3.53424e-283	1
Pdrg1	8.27202e-287	0.834258	0.524	0.307	1.7674e-282	1
Gdi1	9.37509e-287	0.517537	0.686	0.44	2.00308e-282	1
Idi1	1.44486e-286	0.962814	0.574	0.358	3.0871e-282	1
Usf1	8.07777e-286	0.924766	0.51	0.303	1.7259e-281	1
Parp61	1.97288e-285	0.634332	0.464	0.24	4.21527e-281	1
Timm8b	2.34236e-285	0.564766	0.802	0.565	5.00469e-281	1
Ywhab	2.94723e-285	0.541938	0.868	0.632	6.29704e-281	1
Cxxc5	8.3977e-285	0.750467	0.669	0.439	1.79425e-280	1
Atp6v0d1	1.22684e-283	0.64961	0.651	0.42	2.62127e-279	1
Stx7	1.48807e-283	0.847091	0.481	0.261	3.17942e-279	1
Psmb3	1.89573e-283	0.610776	0.825	0.568	4.05042e-279	1
Klf12	2.38933e-283	1.63433	0.253	0.096	5.10505e-279	1
Mapk8ip11	1.29964e-282	0.439465	0.69	0.431	2.77681e-278	1
Csrp1	6.24174e-282	1.22602	0.487	0.283	1.33361e-277	1
Thtpa	2.75522e-281	1.25901	0.306	0.13	5.88681e-277	1
Glce	3.01247e-281	0.53208	0.447	0.225	6.43644e-277	1
Wdr47	3.47594e-281	0.632567	0.444	0.224	7.4267e-277	1
Npc2	1.62743e-279	0.663518	0.65	0.408	3.47716e-275	1
Zfp57	4.55551e-278	0.661283	0.416	0.207	9.7333e-274	1
Rgmb	2.85691e-277	1.24841	0.387	0.199	6.10406e-273	1
Nsdhl	4.27759e-277	1.45401	0.278	0.113	9.13949e-273	1
Abracl	8.49311e-277	0.602957	0.715	0.419	1.81464e-272	1
Ahsa2	6.07204e-276	0.782366	0.56	0.347	1.29735e-271	1
Chmp5	1.00176e-275	0.72116	0.657	0.438	2.14036e-271	1
Taldo1	5.13914e-275	0.601315	0.795	0.551	1.09803e-270	1
Msmo1	1.49253e-274	0.779025	0.517	0.297	3.18895e-270	1
Bcas1	9.6832e-274	1.1569	0.323	0.148	2.06891e-269	1
Mrps33	1.55191e-273	0.591036	0.816	0.554	3.31582e-269	1
Rab10	3.76971e-273	0.674315	0.685	0.46	8.05436e-269	1
Ilf2	1.27369e-272	0.527605	0.838	0.567	2.72136e-268	1
Tmsb15b2	1.21636e-271	1.32531	0.298	0.128	2.59887e-267	1
Tax1bp3	1.22665e-271	1.37564	0.348	0.17	2.62085e-267	1
Eef2	5.10672e-271	0.500137	0.947	0.703	1.0911e-266	1
Gng10	6.48335e-271	0.84325	0.589	0.371	1.38523e-266	1
Arhgef2	5.62923e-270	0.654695	0.546	0.325	1.20274e-265	1
Psma6	2.10843e-269	0.711762	0.691	0.463	4.50487e-265	1
Atox1	4.01096e-269	0.713672	0.602	0.385	8.56982e-265	1
Wbp1	4.86187e-269	1.02388	0.418	0.225	1.03879e-264	1
Hnrnpa0	2.75184e-268	0.486024	0.965	0.7	5.87958e-264	1
Trp53inp1	4.91214e-267	1.22546	0.295	0.126	1.04953e-262	1
Ttc9b	4.07894e-266	0.521746	0.743	0.475	8.71506e-262	1
Nfyb	7.5041e-266	0.877265	0.516	0.308	1.60333e-261	1
Tpt1	9.35846e-266	0.430995	0.98	0.801	1.99953e-261	1
Asic1	2.98613e-265	0.879686	0.257	0.096	6.38016e-261	1
Hdgfl3	5.32941e-265	0.762134	0.589	0.363	1.13868e-260	1
Plk3	7.17934e-265	1.44308	0.268	0.109	1.53394e-260	1
Sh3bgrl	7.22332e-265	0.815941	0.575	0.355	1.54333e-260	1
Bdh1	3.99145e-264	1.01178	0.367	0.176	8.52813e-260	1
Peg13	5.94942e-264	0.714005	0.411	0.199	1.27115e-259	1
Txndc9	2.34819e-263	0.677544	0.648	0.429	5.01715e-259	1
Ttc28	3.13961e-263	0.800535	0.488	0.28	6.70809e-259	1
Palm	4.87597e-263	0.665828	0.552	0.333	1.0418e-258	1
Klhl24	4.38702e-261	0.615575	0.603	0.382	9.3733e-257	1
Chmp2a	4.43893e-260	0.566781	0.733	0.509	9.48422e-256	1
Atp1b3	5.03892e-260	0.470029	0.703	0.47	1.07662e-255	1
Adh5	6.29498e-260	0.645686	0.727	0.476	1.34499e-255	1
Rbm18	1.28622e-259	0.842319	0.501	0.3	2.74814e-255	1
Atp6v1f	3.05845e-259	0.515396	0.791	0.569	6.53468e-255	1
Gm11266	1.3374e-258	1.20919	0.291	0.124	2.85749e-254	1
Cd1d1	1.64489e-257	1.34997	0.265	0.109	3.51447e-253	1
Fam171a2	2.19495e-257	0.397663	0.553	0.317	4.68974e-253	1
Pfdn4	2.17662e-256	0.726161	0.63	0.411	4.65057e-252	1
Pmvk	2.12097e-255	0.863549	0.449	0.248	4.53167e-251	1
Gm4258	1.05761e-254	0.583417	0.516	0.294	2.25969e-250	1
Ube2b	1.57774e-254	0.505858	0.829	0.593	3.371e-250	1
Setbp1	2.09996e-254	0.699643	0.559	0.345	4.48677e-250	1
Psmd14	2.68324e-254	0.681514	0.674	0.447	5.73301e-250	1
Celsr2	3.44546e-254	0.409398	0.723	0.476	7.36156e-250	1
Rps5	4.77787e-254	0.418935	0.979	0.753	1.02084e-249	1
Ing4	8.24954e-254	0.684113	0.539	0.332	1.7626e-249	1
Hnrnpk	3.55816e-253	0.463487	0.968	0.738	7.60236e-249	1
Drap1	4.09152e-253	0.611656	0.762	0.537	8.74194e-249	1
Kdm7a1	1.19188e-252	0.678819	0.415	0.208	2.54657e-248	1
Gnb1	2.83492e-252	0.511014	0.85	0.622	6.05709e-248	1
Ppp2r2c	1.9944e-251	0.527755	0.805	0.556	4.26124e-247	1
Fam107b	2.41956e-251	1.2677	0.305	0.139	5.16963e-247	1
Akap6	2.82503e-251	0.717233	0.53	0.319	6.03595e-247	1
Sema6c	5.51197e-250	0.803807	0.343	0.163	1.17769e-245	1
Apex1	2.38596e-249	0.639137	0.669	0.408	5.09783e-245	1
Prmt1	2.46754e-249	0.530022	0.851	0.547	5.27216e-245	1
Serpini1	3.06934e-249	0.333553	0.396	0.185	6.55794e-245	1
Psmd8	1.18256e-248	0.595534	0.755	0.528	2.52666e-244	1
Traf4	2.61291e-248	1.0707	0.432	0.246	5.58275e-244	1
Actr3	1.05574e-247	0.65467	0.625	0.413	2.25568e-243	1
Map2k2	1.22595e-247	0.615046	0.694	0.467	2.61937e-243	1
Top2b	1.47917e-247	0.429893	0.845	0.624	3.16039e-243	1
Fibp	2.58304e-247	0.718056	0.567	0.363	5.51893e-243	1
Ube2e2	4.77151e-247	0.777275	0.485	0.288	1.01948e-242	1
Rps14	6.93891e-247	0.448318	0.96	0.711	1.48257e-242	1
Ap3s1	8.88845e-247	0.767448	0.545	0.347	1.89911e-242	1
Mpnd	2.23751e-246	0.792807	0.543	0.343	4.78067e-242	1
Unc119	2.39453e-246	1.26398	0.305	0.139	5.11616e-242	1
Eif3k	1.85476e-245	0.561794	0.8	0.549	3.96288e-241	1
Pgls	2.21322e-245	0.577097	0.779	0.525	4.72876e-241	1
9330159F19Rik	2.90598e-245	0.753308	0.401	0.209	6.20892e-241	1
Shisa4	9.46685e-245	0.759904	0.394	0.201	2.02269e-240	1
Rab6a	1.19531e-244	0.508096	0.704	0.483	2.5539e-240	1
Ctnnbip1	9.64549e-244	0.811818	0.524	0.325	2.06085e-239	1
Nova1	2.27469e-243	0.798589	0.377	0.189	4.86009e-239	1
Enox1	1.66066e-242	0.824941	0.332	0.156	3.54816e-238	1
Dazap1	8.16693e-241	0.571126	0.697	0.467	1.74495e-236	1
Rpl11	1.56701e-240	0.406231	0.982	0.781	3.34808e-236	1
Npdc11	1.61654e-240	0.37455	0.705	0.469	3.45389e-236	1
Ube2n	1.85032e-240	0.56377	0.78	0.535	3.95339e-236	1
Enah	2.43356e-240	0.505269	0.657	0.44	5.19954e-236	1
Dync1li1	2.44366e-239	0.765816	0.491	0.294	5.22113e-235	1
Sox5	1.52997e-238	1.05781	0.331	0.16	3.26893e-234	1
Zmiz2	1.96537e-238	0.544817	0.549	0.341	4.1992e-234	1
Ywhaz	2.53144e-238	0.484187	0.883	0.653	5.40867e-234	1
Vps28	3.02794e-238	0.652991	0.564	0.358	6.46949e-234	1
Bloc1s2	7.8494e-238	0.853972	0.482	0.294	1.6771e-233	1
Mtmr4	4.18355e-237	1.0657	0.306	0.143	8.93857e-233	1
Uba1	5.25452e-237	0.610968	0.612	0.407	1.12268e-232	1
Itm2b1	2.25649e-236	0.285885	0.985	0.882	4.82122e-232	1
Dnajc7	2.52137e-236	0.560111	0.709	0.491	5.38715e-232	1
Cct5	2.60712e-236	0.52411	0.831	0.571	5.57036e-232	1
Rps7	2.91609e-236	0.408464	0.97	0.757	6.23052e-232	1
Ubqln2	8.29691e-236	0.642481	0.617	0.41	1.77272e-231	1
Tmem223	3.94341e-235	0.5652	0.685	0.466	8.42548e-231	1
Ube2m	5.89496e-235	0.548353	0.809	0.57	1.25952e-230	1
Vps29	7.55362e-235	0.601165	0.641	0.436	1.61391e-230	1
Onecut2	3.65889e-234	1.11442	0.261	0.109	7.81759e-230	1
Rpl15	1.306e-233	0.394269	0.981	0.772	2.7904e-229	1
Rps24	1.70912e-233	0.405792	0.982	0.819	3.65171e-229	1
Fscn1	1.98605e-233	0.765354	0.572	0.352	4.2434e-229	1
Ccni	5.90244e-232	0.579999	0.652	0.444	1.26111e-227	1
Prkx	1.40755e-231	1.05985	0.296	0.136	3.00737e-227	1
Clcn4	1.50729e-231	0.356661	0.665	0.44	3.22048e-227	1
Hnrnph3	2.09769e-231	0.503724	0.73	0.492	4.48192e-227	1
Rabep1	2.89023e-231	0.796076	0.472	0.283	6.17526e-227	1
Zfpm1	1.7441e-230	1.26687	0.316	0.154	3.72645e-226	1
Prelid1	5.17741e-230	0.706299	0.629	0.423	1.10621e-225	1
Cask	8.16434e-230	0.446936	0.503	0.291	1.74439e-225	1
Tcaf1	1.05105e-229	0.472889	0.706	0.486	2.24567e-225	1
Rpl7a	1.57744e-229	0.442883	0.95	0.66	3.37036e-225	1
1500004A13Rik1	2.54697e-229	0.58493	0.47	0.265	5.44185e-225	1
Akap12	2.78922e-229	0.837353	0.309	0.137	5.95944e-225	1
Psmd6	9.22893e-229	0.590361	0.701	0.487	1.97185e-224	1
Bbc3	1.17301e-228	0.943061	0.285	0.123	2.50625e-224	1
Celf5	2.39313e-228	0.558418	0.353	0.166	5.11317e-224	1
Pomp	4.16118e-228	0.506315	0.827	0.592	8.89077e-224	1
Gramd1a	1.10239e-227	0.53954	0.471	0.272	2.35536e-223	1
Mras	1.69444e-227	1.00055	0.342	0.171	3.62033e-223	1
Jund	3.94055e-227	0.407068	0.959	0.772	8.41938e-223	1
Sin3b	3.08593e-226	0.593614	0.653	0.442	6.59339e-222	1
Hcfc1r1	4.30573e-226	0.471081	0.587	0.36	9.19963e-222	1
Psme1	7.64e-225	0.906329	0.457	0.277	1.63236e-220	1
Chst15	1.11494e-224	1.03568	0.334	0.168	2.38219e-220	1
Flot1	1.11858e-224	0.744978	0.406	0.218	2.38996e-220	1
Pid1	1.26525e-224	1.02415	0.291	0.131	2.70332e-220	1
Map3k1	1.57839e-224	0.549025	0.688	0.44	3.37239e-220	1
Zfp292	4.9236e-224	0.494434	0.668	0.457	1.05198e-219	1
Eci2	6.091e-224	0.833965	0.509	0.321	1.3014e-219	1
Psmb1	8.59866e-224	0.483685	0.874	0.623	1.83719e-219	1
Rassf4	9.33405e-224	0.74182	0.538	0.323	1.99431e-219	1
Atl11	2.46567e-223	0.451502	0.474	0.266	5.26815e-219	1
Psma2	4.93386e-223	0.507969	0.851	0.598	1.05417e-218	1
Ctif	1.12316e-222	1.15592	0.274	0.122	2.39974e-218	1
Cmc1	1.30323e-222	1.00099	0.401	0.228	2.78447e-218	1
Psme2	1.68338e-222	1.00107	0.409	0.236	3.59671e-218	1
Rplp0	2.82091e-222	0.34411	0.978	0.761	6.02716e-218	1
Clybl	3.48505e-222	0.931996	0.375	0.197	7.44615e-218	1
Kmt2e	4.99047e-222	0.433598	0.751	0.537	1.06626e-217	1
Cct4	1.01721e-221	0.535352	0.759	0.505	2.17337e-217	1
Vps37d	1.17517e-221	1.0796	0.273	0.121	2.51087e-217	1
Commd3	1.86215e-221	0.583328	0.681	0.467	3.97868e-217	1
Ptpn1	1.2286e-220	0.750818	0.455	0.272	2.62502e-216	1
Zfp560	4.10184e-220	0.995064	0.375	0.205	8.764e-216	1
Avl9	5.12128e-220	0.704691	0.394	0.211	1.09421e-215	1
Ube2g1	8.57805e-220	0.729257	0.488	0.301	1.83279e-215	1
Mrpl53	1.40355e-219	0.546113	0.736	0.513	2.99882e-215	1
Pin1	2.59059e-219	0.60542	0.672	0.454	5.53505e-215	1
Sh3glb1	6.06408e-219	0.517224	0.733	0.489	1.29565e-214	1
Dscaml1	7.71098e-219	0.94804	0.255	0.107	1.64753e-214	1
Mtch1	9.66037e-219	0.486579	0.802	0.583	2.06403e-214	1
Mpped2	9.03196e-218	0.610984	0.505	0.305	1.92977e-213	1
Ephb2	3.59846e-217	0.659182	0.343	0.172	7.68847e-213	1
Lamtor4	3.71953e-217	0.52889	0.641	0.439	7.94714e-213	1
Tpgs2	6.29821e-216	1.04634	0.377	0.211	1.34568e-211	1
Snrpe	7.29483e-216	0.451571	0.905	0.605	1.55861e-211	1
H13	3.36193e-215	0.553229	0.478	0.288	7.18311e-211	1
Pik3r31	1.06878e-214	0.340398	0.55	0.326	2.28356e-210	1
Fmnl2	3.92545e-214	0.749604	0.397	0.219	8.38712e-210	1
Prkra	1.20232e-213	0.973661	0.409	0.24	2.56887e-209	1
Plxna3	4.13089e-213	0.800117	0.253	0.107	8.82606e-209	1
Zfp68	1.05363e-212	0.656443	0.496	0.31	2.25119e-208	1
Cox7a2l	1.54236e-212	0.570401	0.706	0.49	3.2954e-208	1
Add21	5.34087e-212	0.660833	0.393	0.21	1.14113e-207	1
Fasn	5.8267e-212	0.538468	0.543	0.347	1.24493e-207	1
Pbx3	9.88897e-211	0.725615	0.521	0.328	2.11288e-206	1
Mff	2.55079e-210	0.517032	0.681	0.479	5.45001e-206	1
Ap1s2	2.66441e-210	0.768458	0.422	0.24	5.69278e-206	1
Vps72	4.54351e-210	0.822379	0.482	0.306	9.70766e-206	1
Rab2b	7.19457e-210	0.946615	0.331	0.169	1.53719e-205	1
Smarcb1	9.54385e-210	0.677179	0.576	0.387	2.03914e-205	1
H2afj	1.69935e-209	0.600297	0.616	0.413	3.63082e-205	1
Psma3	2.18697e-209	0.438359	0.912	0.673	4.67267e-205	1
Arpc2	3.03077e-209	0.552379	0.709	0.498	6.47554e-205	1
Rhob	3.94978e-209	0.492955	0.582	0.379	8.4391e-205	1
Rps11	6.67386e-209	0.375209	0.973	0.748	1.42594e-204	1
Satb1	8.63803e-209	0.732009	0.475	0.294	1.8456e-204	1
Eif4e31	1.53976e-208	0.585606	0.417	0.23	3.28986e-204	1
Ufc1	2.36957e-208	0.628071	0.637	0.445	5.06282e-204	1
Nae11	4.49738e-208	0.380093	0.679	0.471	9.60911e-204	1
Cct7	6.94571e-208	0.463578	0.851	0.59	1.48402e-203	1
Gtf2h5	7.25008e-208	0.485775	0.795	0.566	1.54905e-203	1
Atp5j	7.82852e-208	0.392896	0.956	0.736	1.67264e-203	1
Lsm1	3.05475e-207	0.733539	0.537	0.357	6.52679e-203	1
Borcs8	3.95941e-207	0.887526	0.364	0.196	8.45967e-203	1
Wdr6	9.33869e-207	0.634425	0.422	0.24	1.99531e-202	1
C130071C03Rik	1.55165e-206	0.381691	0.706	0.486	3.31526e-202	1
Bpgm	2.48231e-206	0.904617	0.355	0.19	5.3037e-202	1
Ddit4	5.95312e-206	0.819534	0.403	0.223	1.27194e-201	1
Paip2	8.12214e-206	0.456657	0.844	0.604	1.73538e-201	1
Sdc3	9.86978e-206	0.427979	0.304	0.137	2.10878e-201	1
Clip3	1.87517e-205	0.392779	0.632	0.414	4.00649e-201	1
Mir100hg	2.19644e-205	1.06393	0.335	0.176	4.6929e-201	1
Thra	2.40291e-205	0.31849	0.69	0.453	5.13405e-201	1
Smarca4	2.95077e-205	0.466077	0.707	0.49	6.30462e-201	1
Socs2	3.03969e-205	0.958939	0.382	0.213	6.49461e-201	1
Mia	4.27982e-205	0.444373	0.328	0.151	9.14427e-201	1
Spg21	4.98133e-204	1.03836	0.39	0.229	1.06431e-199	1
Prr36	6.30703e-204	0.98005	0.26	0.116	1.34756e-199	1
Pdcl3	7.95702e-204	0.659206	0.579	0.392	1.7001e-199	1
Ndufs4	8.65672e-204	0.440546	0.824	0.611	1.8496e-199	1
Trir	1.24156e-203	0.468302	0.821	0.589	2.65272e-199	1
Med22	2.6524e-203	0.916537	0.408	0.24	5.66711e-199	1
Tmem50a	3.57496e-203	0.581526	0.503	0.314	7.63826e-199	1
Slf1	1.02346e-202	0.716314	0.446	0.271	2.18673e-198	1
Serp2	7.93553e-202	0.54246	0.515	0.312	1.6955e-197	1
Snapc5	1.39624e-201	0.964161	0.388	0.224	2.9832e-197	1
Mpc1	2.64493e-201	0.407868	0.841	0.629	5.65116e-197	1
Nedd8	3.18377e-201	0.433522	0.919	0.684	6.80243e-197	1
Amn1	4.58089e-201	0.709834	0.364	0.196	9.78753e-197	1
Ddx6	9.22219e-201	0.465995	0.736	0.527	1.97041e-196	1
Bzw1	1.83967e-200	0.436075	0.843	0.585	3.93064e-196	1
Zfp326	1.90233e-200	0.541596	0.629	0.423	4.06451e-196	1
Vcp	2.59498e-200	0.454651	0.8	0.579	5.54444e-196	1
Csde1	4.5603e-200	0.443478	0.814	0.584	9.74353e-196	1
Svbp	1.12988e-198	0.818154	0.475	0.304	2.41411e-194	1
Mxi1	1.19595e-198	0.58002	0.558	0.368	2.55526e-194	1
Ccdc124	1.61299e-198	0.671551	0.578	0.395	3.44632e-194	1
Ube2e1	1.85832e-198	0.664202	0.568	0.384	3.97048e-194	1
Cox19	3.31118e-198	0.785893	0.443	0.272	7.07466e-194	1
Zic5	4.84944e-198	0.591533	0.641	0.436	1.03613e-193	1
Ostf1	6.30711e-198	0.989476	0.309	0.155	1.34758e-193	1
Sf3b6	1.41953e-197	0.49165	0.773	0.536	3.03297e-193	1
Rwdd3	1.98753e-197	1.15866	0.255	0.116	4.24655e-193	1
Fkbp1a	2.82232e-197	0.462191	0.807	0.585	6.03017e-193	1
Gpr27	4.53931e-197	0.711715	0.331	0.167	9.69869e-193	1
Mcrip1	6.85938e-197	0.637942	0.566	0.385	1.46558e-192	1
Yeats4	7.67556e-197	0.665481	0.576	0.389	1.63996e-192	1
Rps4x	2.08313e-196	0.325461	0.977	0.743	4.45082e-192	1
Ypel5	1.81538e-195	0.900865	0.349	0.187	3.87875e-191	1
Cct2	2.71989e-195	0.432945	0.879	0.598	5.81131e-191	1
Maged1	3.87789e-195	0.324347	0.744	0.531	8.28551e-191	1
Psma5	3.0336e-194	0.484208	0.79	0.553	6.48158e-190	1
Rusc1	3.40573e-194	0.565256	0.372	0.198	7.27668e-190	1
2900097C17Rik	3.72878e-194	0.506668	0.605	0.413	7.96691e-190	1
Mcts1	3.79281e-194	0.657253	0.481	0.303	8.10372e-190	1
Tm2d2	5.61481e-194	0.463426	0.622	0.426	1.19966e-189	1
Tspan13	1.26237e-193	0.500513	0.459	0.271	2.69718e-189	1
Rpl34	2.53923e-193	0.387291	0.96	0.739	5.42532e-189	1
Psmb5	2.80648e-193	0.470253	0.849	0.608	5.99632e-189	1
Txnl4a	5.14955e-193	0.58519	0.637	0.433	1.10025e-188	1
Chd3	6.11939e-193	0.457988	0.485	0.285	1.30747e-188	1
Tmcc11	1.74408e-192	0.342369	0.54	0.338	3.72641e-188	1
Arl3	1.26367e-191	0.556641	0.654	0.461	2.69996e-187	1
1300002E11Rik	1.35658e-190	0.83088	0.374	0.214	2.89847e-186	1
Ap2m1	4.6412e-190	0.469834	0.707	0.515	9.91639e-186	1
Commd2	8.92841e-190	0.803273	0.467	0.302	1.90764e-185	1
Ro60	3.4506e-189	0.669537	0.466	0.291	7.37255e-185	1
Dvl31	9.37336e-189	0.596957	0.409	0.238	2.00271e-184	1
Smarcc2	1.19904e-187	0.383782	0.615	0.42	2.56186e-183	1
Psmc5	2.36659e-187	0.424716	0.824	0.616	5.05647e-183	1
Nt5c	1.13449e-186	0.514326	0.562	0.371	2.42396e-182	1
Rpl19	1.50818e-186	0.328244	0.985	0.81	3.22238e-182	1
Med10	1.82204e-186	0.686091	0.516	0.344	3.89297e-182	1
Smdt1	2.11913e-186	0.434357	0.833	0.623	4.52773e-182	1
Eid2	3.5171e-186	0.613225	0.564	0.383	7.51464e-182	1
Rpl21	4.21742e-186	0.364244	0.964	0.727	9.01094e-182	1
Ankrd13a	1.15382e-185	0.793404	0.359	0.202	2.46526e-181	1
Bckdha	2.76247e-185	0.996973	0.283	0.14	5.9023e-181	1
Akt1	5.21712e-185	0.65534	0.53	0.356	1.11469e-180	1
Ttc31	1.49877e-184	0.258919	0.963	0.819	3.20227e-180	1
Bex3	6.24726e-184	0.417774	0.911	0.659	1.33479e-179	1
Tnfrsf21	1.85877e-183	0.956999	0.261	0.123	3.97146e-179	1
Trak1	3.64564e-183	0.716016	0.438	0.273	7.78928e-179	1
Cdk2ap1	1.1825e-182	0.475039	0.699	0.441	2.52653e-178	1
Tgfb2	5.00593e-182	0.947092	0.367	0.212	1.06957e-177	1
Kif3c	6.95285e-182	0.681556	0.29	0.141	1.48555e-177	1
Rpl23a	1.06199e-181	0.387821	0.874	0.574	2.26905e-177	1
Manf	1.61226e-181	0.490473	0.75	0.528	3.44475e-177	1
Ctnna2	1.64088e-181	0.571787	0.299	0.146	3.5059e-177	1
Rpl35	4.01238e-181	0.382259	0.937	0.669	8.57285e-177	1
Rab2a	4.54897e-181	0.352407	0.868	0.657	9.71934e-177	1
Rbis	1.0799e-180	0.595299	0.594	0.409	2.30731e-176	1
Qdpr	1.15302e-180	0.839551	0.433	0.274	2.46354e-176	1
Phax	1.69791e-180	0.584122	0.595	0.416	3.62776e-176	1
Rtn2	2.62828e-180	0.758484	0.418	0.256	5.61559e-176	1
Uchl3	3.30626e-180	0.563743	0.606	0.41	7.06415e-176	1
Fam57b1	3.8368e-180	0.345931	0.517	0.324	8.19771e-176	1
Pfdn1	4.94004e-180	0.498547	0.65	0.46	1.05549e-175	1
Stx12	5.70743e-179	0.652866	0.507	0.337	1.21945e-174	1
Sars	1.12001e-178	0.505521	0.647	0.46	2.39301e-174	1
Cxadr	1.21042e-178	0.539951	0.31	0.156	2.58618e-174	1
Trafd1	1.34202e-178	0.566376	0.353	0.192	2.86736e-174	1
Prox1	1.50411e-178	0.686153	0.507	0.334	3.21369e-174	1
R3hcc1	2.51926e-178	0.984379	0.35	0.201	5.38265e-174	1
Cbr1	2.63735e-178	0.873694	0.415	0.258	5.63497e-174	1
Psmb7	2.83092e-178	0.486526	0.695	0.496	6.04854e-174	1
Capzb	5.47255e-178	0.589828	0.59	0.416	1.16927e-173	1
Rpl17	1.60113e-177	0.348487	0.943	0.671	3.42096e-173	1
Vdac3	4.96417e-177	0.390331	0.889	0.663	1.06064e-172	1
Peli2	1.10895e-176	0.562881	0.442	0.272	2.36939e-172	1
Tbpl1	1.31939e-176	0.665731	0.495	0.329	2.81901e-172	1
Elob	2.0498e-176	0.398161	0.94	0.71	4.37961e-172	1
Mrpl20	1.99893e-175	0.447967	0.797	0.577	4.27091e-171	1
Pkia	2.57528e-175	0.442244	0.498	0.307	5.50234e-171	1
Zfp266	9.90299e-175	0.406392	0.66	0.465	2.11587e-170	1
Rnasek	1.4111e-174	0.264046	0.879	0.685	3.01496e-170	1
Caprin1	2.14954e-174	0.417133	0.799	0.568	4.59271e-170	1
Rpl9	5.71246e-174	0.320646	0.979	0.786	1.22052e-169	1
St7	8.30061e-174	0.619966	0.334	0.182	1.77351e-169	1
Zfp637	1.35136e-173	0.702336	0.51	0.344	2.88733e-169	1
Fam32a	1.15616e-172	0.682303	0.523	0.359	2.47025e-168	1
Ufm1	1.79998e-172	0.720521	0.49	0.33	3.84583e-168	1
Fkbp4	2.83922e-172	0.444887	0.785	0.552	6.06628e-168	1
Stk25	3.75254e-172	0.494326	0.501	0.329	8.01769e-168	1
Sub1	5.29898e-172	0.418692	0.841	0.592	1.13218e-167	1
Rbmx	1.23741e-171	0.399792	0.702	0.483	2.64385e-167	1
Rab11b	1.63138e-171	0.533429	0.579	0.404	3.48562e-167	1
Manbal	1.93144e-171	0.765277	0.408	0.253	4.12671e-167	1
Ube2ql1	3.67749e-171	0.846857	0.256	0.119	7.85732e-167	1
Brms1	5.84938e-171	1.17724	0.277	0.146	1.24978e-166	1
Vps35	7.4339e-171	0.422345	0.641	0.457	1.58833e-166	1
Polb1	7.47934e-171	0.39713	0.513	0.337	1.59803e-166	1
C1d	8.39936e-171	0.60313	0.558	0.388	1.79461e-166	1
Dapk1	1.15373e-170	1.15882	0.293	0.158	2.46506e-166	1
Rnf187	2.28633e-170	0.395013	0.84	0.621	4.88497e-166	1
Snapc31	4.09739e-170	0.506546	0.366	0.208	8.75447e-166	1
Dchs1	4.33278e-170	0.935604	0.259	0.128	9.25741e-166	1
Coa3	5.8121e-170	0.464423	0.706	0.513	1.24181e-165	1
Zfp608	1.41014e-169	0.60752	0.438	0.275	3.01291e-165	1
Lamtor2	3.25105e-169	0.459609	0.734	0.537	6.94619e-165	1
Nono	3.87137e-169	0.413183	0.784	0.532	8.27157e-165	1
Cab39	8.08101e-169	0.605615	0.497	0.331	1.72659e-164	1
Btg1	1.32645e-168	0.274801	0.844	0.642	2.83408e-164	1
Spcs1	1.94925e-168	0.473931	0.692	0.5	4.16477e-164	1
Chd4	3.51185e-168	0.381426	0.863	0.667	7.50343e-164	1
Clasp1	1.22486e-167	0.408016	0.49	0.32	2.61703e-163	1
Srebf2	1.5356e-167	0.383695	0.491	0.317	3.28096e-163	1
Gna12	3.92073e-167	0.965748	0.352	0.209	8.37703e-163	1
Ube2d2a	4.23196e-167	0.435061	0.706	0.509	9.04201e-163	1
Rack1	7.00533e-167	0.348685	0.929	0.624	1.49676e-162	1
Rbm41	3.46865e-166	0.460059	0.495	0.327	7.41111e-162	1
Coro1a	1.14806e-165	0.453598	0.317	0.158	2.45294e-161	1
Pdap1	1.15064e-165	0.419866	0.814	0.566	2.45847e-161	1
Actr10	1.25404e-165	0.427817	0.636	0.459	2.67938e-161	1
Pou2f2	1.49258e-165	0.439838	0.293	0.142	3.18905e-161	1
Wdfy1	1.8431e-164	0.744481	0.394	0.242	3.93797e-160	1
Khdrbs3	2.16846e-164	1.02975	0.4	0.254	4.63313e-160	1
Leprotl1	3.47924e-164	0.628625	0.425	0.267	7.43374e-160	1
Cog1	3.77791e-164	0.754935	0.33	0.184	8.07189e-160	1
Dnajb6	1.02161e-163	0.304463	0.828	0.626	2.18277e-159	1
Sec61g	1.90981e-163	0.399677	0.888	0.634	4.08049e-159	1
Romo1	4.47979e-163	0.412772	0.751	0.548	9.57152e-159	1
Mtpn	8.3221e-163	0.54626	0.576	0.406	1.7781e-158	1
Adgrg1	8.35453e-162	0.542163	0.454	0.293	1.78503e-157	1
Zc3h15	1.89248e-161	0.456443	0.691	0.491	4.04348e-157	1
Znrf1	4.66918e-161	0.51926	0.442	0.282	9.97617e-157	1
Pdxp	5.29598e-161	0.359294	0.658	0.461	1.13154e-156	1
Pea15a	6.88562e-161	0.466117	0.445	0.272	1.47118e-156	1
Zkscan1	7.89862e-161	0.614978	0.456	0.298	1.68762e-156	1
Rpl29	9.21733e-161	0.364315	0.92	0.629	1.96937e-156	1
Snrpb2	2.00135e-160	0.721615	0.479	0.321	4.27608e-156	1
Tmem65	2.40993e-160	0.516584	0.462	0.297	5.14905e-156	1
Ppp1r11	3.27245e-160	0.505356	0.608	0.439	6.99192e-156	1
Hivep1	4.14373e-160	0.703659	0.303	0.161	8.85349e-156	1
Rab14	5.09391e-160	0.321292	0.807	0.608	1.08836e-155	1
Shd	1.83222e-159	0.569731	0.32	0.171	3.91472e-155	1
Swi5	3.32618e-159	0.406793	0.804	0.577	7.10673e-155	1
Idnk	4.36147e-158	0.908859	0.289	0.153	9.31873e-154	1
Oga1	8.30248e-158	0.363927	0.519	0.347	1.77391e-153	1
Ckap4	1.08369e-157	0.565497	0.554	0.382	2.31542e-153	1
Supt4a	3.36345e-157	0.458311	0.675	0.486	7.18634e-153	1
Vapa	2.18327e-156	0.375642	0.846	0.631	4.66477e-152	1
Psmd13	2.76518e-156	0.484571	0.64	0.454	5.90807e-152	1
Ubc	3.35811e-156	0.280913	0.935	0.735	7.17494e-152	1
Cttnbp2nl	3.99772e-156	1.07716	0.258	0.132	8.54154e-152	1
Chic2	1.22182e-155	0.485024	0.563	0.397	2.61055e-151	1
Yaf2	2.21056e-155	0.622953	0.537	0.374	4.72308e-151	1
Dgcr6	2.32942e-155	0.540551	0.557	0.391	4.97703e-151	1
Nsa2	2.38128e-155	0.48798	0.662	0.457	5.08785e-151	1
Sec11a	2.62875e-155	0.385043	0.659	0.476	5.61658e-151	1
Rps15a	2.937e-155	0.287459	0.963	0.751	6.27519e-151	1
Stau2	5.54231e-155	0.685977	0.364	0.217	1.18417e-150	1
Zfp521	1.16626e-154	0.563128	0.296	0.153	2.49184e-150	1
Msantd3	1.44723e-154	1.00146	0.356	0.22	3.09216e-150	1
Tmem160	8.68657e-154	0.452295	0.638	0.465	1.85597e-149	1
Ap2s1	9.59037e-154	0.439059	0.665	0.484	2.04908e-149	1
Actr1a	3.00923e-153	0.620011	0.424	0.274	6.42953e-149	1
Brk1	5.34242e-153	0.449813	0.667	0.489	1.14146e-148	1
Mpc2	5.40495e-153	0.312234	0.771	0.583	1.15482e-148	1
Gstm5	1.04338e-152	0.498642	0.559	0.382	2.22928e-148	1
Rab11a	1.04476e-152	0.625998	0.475	0.324	2.23224e-148	1
Zfp60	1.45266e-152	0.844153	0.302	0.167	3.10374e-148	1
Gab1	1.88217e-152	0.775139	0.291	0.157	4.02145e-148	1
Vezf1	2.42115e-152	0.643342	0.503	0.347	5.17304e-148	1
Trp53bp1	2.97293e-152	0.60288	0.359	0.214	6.35196e-148	1
Zeb2	2.81125e-151	0.543467	0.554	0.372	6.00651e-147	1
Cfl2	1.2113e-150	0.354451	0.73	0.53	2.58806e-146	1
Arid4b	2.19971e-150	0.384261	0.656	0.478	4.6999e-146	1
Cops9	6.96635e-150	0.506809	0.584	0.415	1.48843e-145	1
Bag5	9.48922e-150	0.796292	0.418	0.275	2.02747e-145	1
Tmed9	1.27608e-149	0.251562	0.894	0.703	2.72648e-145	1
Rps23	1.44932e-149	0.2769	0.97	0.742	3.09662e-145	1
Pigp	1.75715e-149	0.56095	0.5	0.343	3.75432e-145	1
Gtf2a2	2.64509e-149	0.387201	0.764	0.546	5.6515e-145	1
Copb2	3.0214e-149	0.515111	0.549	0.39	6.45552e-145	1
Ube2g2	3.03622e-149	0.977585	0.307	0.177	6.48719e-145	1
Dyrk2	6.05582e-149	1.01252	0.296	0.167	1.29389e-144	1
Daam1	7.64745e-149	0.44312	0.501	0.336	1.63395e-144	1
Polr2j	1.9902e-148	0.454902	0.681	0.494	4.25226e-144	1
Ubxn1	4.0183e-148	0.408732	0.781	0.56	8.58551e-144	1
Sdcbp	4.85626e-148	0.495739	0.481	0.322	1.03759e-143	1
Rtf1	5.547e-148	0.388578	0.666	0.485	1.18517e-143	1
Cuta	6.66901e-148	0.41183	0.65	0.478	1.4249e-143	1
Mob4	8.59996e-148	0.443314	0.596	0.429	1.83747e-143	1
Maml31	1.02471e-147	0.270005	0.488	0.312	2.18939e-143	1
Mrpl43	1.49323e-147	0.503417	0.613	0.445	3.19044e-143	1
Psma1	3.10035e-147	0.36544	0.738	0.542	6.62422e-143	1
Tmod2	3.55576e-147	0.38833	0.514	0.345	7.59724e-143	1
Mdh2	4.30967e-147	0.355164	0.833	0.628	9.20805e-143	1
Ube2l3	5.13324e-147	0.476435	0.659	0.474	1.09677e-142	1
Tle1	5.5889e-147	0.815647	0.416	0.273	1.19412e-142	1
Pdcd5	7.52962e-147	0.412065	0.733	0.519	1.60878e-142	1
Zfand6	7.80456e-147	0.406726	0.591	0.425	1.66752e-142	1
Psmb2	8.99526e-147	0.397709	0.783	0.554	1.92193e-142	1
1110004F10Rik	2.37793e-146	0.402956	0.76	0.547	5.08069e-142	1
Trim35	2.6564e-146	0.302635	0.629	0.452	5.67567e-142	1
Ppdpf	5.23102e-146	0.562016	0.557	0.394	1.11766e-141	1
Pbrm1	5.7789e-146	0.359072	0.785	0.55	1.23472e-141	1
March5	6.24172e-146	0.493512	0.598	0.427	1.33361e-141	1
Lamtor5	3.00446e-145	0.489056	0.593	0.43	6.41932e-141	1
March9	4.2018e-145	0.747061	0.273	0.143	8.97757e-141	1
Tmem178b	9.50616e-145	0.441293	0.321	0.178	2.03109e-140	1
Rpl23	1.27576e-144	0.254089	0.979	0.777	2.72578e-140	1
Ldb11	1.85358e-144	0.479135	0.422	0.271	3.96036e-140	1
Ndufb4	2.93377e-144	0.349445	0.767	0.569	6.26829e-140	1
Rpl6	4.71928e-144	0.306409	0.971	0.748	1.00832e-139	1
Ubxn6	4.78525e-144	0.515101	0.467	0.313	1.02242e-139	1
Cttnbp2	7.70109e-144	1.0046	0.258	0.136	1.64542e-139	1
Tcp11l1	1.9559e-143	0.786169	0.271	0.145	4.17899e-139	1
Slc39a6	1.98491e-143	0.561119	0.4	0.255	4.24096e-139	1
Psmd7	2.65414e-143	0.374687	0.763	0.557	5.67083e-139	1
Gse1	4.1078e-143	0.444368	0.648	0.451	8.77672e-139	1
Cdc42	4.42695e-143	0.325623	0.89	0.69	9.45863e-139	1
Elovl6	1.0387e-142	0.512761	0.414	0.264	2.21929e-138	1
Ten1	1.79874e-142	0.763844	0.364	0.225	3.84318e-138	1
Cops5	3.61637e-142	0.512251	0.524	0.373	7.72673e-138	1
0610010K14Rik	5.70179e-142	0.58907	0.525	0.365	1.21825e-137	1
2510009E07Rik	7.11948e-142	0.80469	0.291	0.161	1.52115e-137	1
Napa	1.71379e-141	0.332587	0.636	0.466	3.66168e-137	1
Grb2	1.87373e-141	0.379289	0.565	0.401	4.00342e-137	1
Ube2i	2.25273e-141	0.359318	0.787	0.534	4.81319e-137	1
Rps13	3.6241e-141	0.284755	0.972	0.768	7.74326e-137	1
Tdg	4.23957e-141	0.589177	0.481	0.331	9.05827e-137	1
Mir99ahg	4.97145e-141	0.318411	0.668	0.476	1.0622e-136	1
Bag1	2.88138e-140	0.435801	0.686	0.495	6.15636e-136	1
Snx6	5.0219e-140	0.477694	0.559	0.396	1.07298e-135	1
Sumo1	5.40992e-140	0.36709	0.834	0.606	1.15588e-135	1
Prkar1a	5.89057e-140	0.320906	0.73	0.551	1.25858e-135	1
Naa35	6.14385e-140	0.426308	0.49	0.338	1.3127e-135	1
Pard6g	9.35709e-140	0.595202	0.317	0.181	1.99924e-135	1
Pnmal1	1.19162e-139	0.510785	0.287	0.149	2.54602e-135	1
Polr2k	1.42956e-139	0.493578	0.573	0.411	3.05439e-135	1
1110038B12Rik	1.70978e-139	0.482724	0.587	0.401	3.65311e-135	1
Rpl24	2.07726e-139	0.301238	0.972	0.765	4.43828e-135	1
Ndufa8	4.23358e-139	0.349501	0.745	0.562	9.04547e-135	1
Ostc	6.47948e-139	0.394898	0.672	0.487	1.38441e-134	1
Myo16	9.00427e-139	1.04868	0.254	0.137	1.92385e-134	1
Trappc6b	1.23162e-138	0.44621	0.53	0.373	2.63148e-134	1
Pdcd6	1.40763e-138	0.503384	0.528	0.378	3.00753e-134	1
Zfp428	7.87036e-138	0.588402	0.477	0.327	1.68158e-133	1
Fbxo11	9.17978e-138	0.373777	0.475	0.316	1.96135e-133	1
Sdhaf4	1.49348e-137	0.738477	0.383	0.245	3.19097e-133	1
Ppp1r1a	1.81918e-137	0.551695	0.349	0.2	3.88687e-133	1
Akt1s1	4.35856e-137	0.699301	0.418	0.281	9.3125e-133	1
Egfr	9.59341e-137	0.83418	0.27	0.148	2.04973e-132	1
Mea1	1.87253e-136	0.871793	0.363	0.232	4.00084e-132	1
Olig3	2.0231e-136	1.25461	0.28	0.158	4.32256e-132	1
Tomm22	2.088e-136	0.443829	0.667	0.492	4.46123e-132	1
Gemin7	2.60354e-136	0.7033	0.413	0.277	5.56272e-132	1
Commd4	2.79989e-136	0.549933	0.428	0.285	5.98225e-132	1
Cuedc2	1.93098e-135	0.338822	0.78	0.581	4.12573e-131	1
Map9	2.21957e-135	0.817764	0.277	0.152	4.74234e-131	1
H2afy	6.40918e-135	0.309912	0.92	0.637	1.36939e-130	1
Tmem258	6.80143e-135	0.419328	0.662	0.488	1.45319e-130	1
Sys1	8.39312e-135	0.430988	0.552	0.396	1.79327e-130	1
D8Ertd738e	2.16197e-134	0.400265	0.726	0.526	4.61928e-130	1
Psmc2	2.20742e-134	0.455163	0.631	0.467	4.71636e-130	1
Sufu	2.74739e-134	0.748025	0.32	0.191	5.87008e-130	1
Tram1l1	3.44686e-134	0.60819	0.252	0.129	7.36455e-130	1
Rnf11	4.08565e-134	0.46427	0.508	0.356	8.72939e-130	1
Ulk2	4.3752e-134	0.462707	0.368	0.225	9.34806e-130	1
Pabpn1	1.73628e-133	0.300583	0.942	0.741	3.70974e-129	1
Smim7	2.25841e-133	0.535458	0.503	0.359	4.82532e-129	1
Psenen	6.99087e-133	0.357205	0.677	0.5	1.49367e-128	1
Cald1	7.56066e-133	0.296365	0.71	0.523	1.61541e-128	1
Camsap11	1.28149e-132	0.345088	0.452	0.298	2.73804e-128	1
Nipsnap3b	1.47765e-132	1.05528	0.293	0.174	3.15716e-128	1
Bcl2l11	3.05865e-132	0.506208	0.355	0.214	6.53511e-128	1
Phf14	9.05294e-132	0.262288	0.608	0.442	1.93425e-127	1
[truncated: 27,457 more rows]
