# Supplementary material for: PTEN restrains SHH medulloblastoma growth through cell autonomous and nonautonomous mechanisms
Source: eLife. 2026 Apr 17;14:RP108190. doi: 10.7554/eLife.108190 (PMC13090030; doi:10.7554/eLife.108190)
Supplement: Figure 8—figure supplement 2—source data 2. — Related to Figure 8F and G, Figure 8—figure supplement 2G. [file elife-108190-fig8-figsupp2-data2.xlsx]

## Sheet: Figure 8-Supp-source data 2
Figure 8-Supplement 2-source data 2. Cell numbers per cluster for each genotype based on merged scRNA-seq data. Related to Figure 8 F, G and Figure 8-Supplement 2G.
Clusters	SmoM2	SmoM2; Ptenfl/fl
0	5064	568
1	953	4661
2	5167	431
3	796	3337
4	906	2507
5	419	2774
6	629	2471
7	378	2548
8	584	2279
9	560	406
10	533	306
11	426	39
12	306	30
13	178	145
14	259	47
15	209	87
16	246	39
17	189	46
18	146	42
19	50	101
total	17998	22864
