# Supplementary material for: PTEN restrains SHH medulloblastoma growth through cell autonomous and nonautonomous mechanisms
Source: eLife. 2026 Apr 17;14:RP108190. doi: 10.7554/eLife.108190 (PMC13090030; doi:10.7554/eLife.108190)
Supplement: Figure 9—figure supplement 1—source data 1. — Related to Figure 9—figure supplement 1A. [file elife-108190-fig9-figsupp1-data1.xlsx]

## Sheet: Figure 9-Supp-1-source data 1
Figure 9-Supplemental 1-source data 1. GSEA analysis of Hallmark terms of DEG gene list of GCP-like cells in SmoM2; Ptenfl/fl compared with SmoM2 tumors. Related to Figure 9-Supplemental 1A.
HALLMARK Terms	ID	Description	setSize	enrichmentScore	NES	pvalue	p.adjust	qvalue	rank	leading_edge	core_enrichment
HALLMARK_MTORC1_SIGNALING	HALLMARK_MTORC1_SIGNALING	HALLMARK_MTORC1_SIGNALING	140	0.425173	2.11593	3.25213e-06	0.000162606	0.000123239	1246	tags=31%, list=16%, signal=27%	Nupr1/Slc6a6/Cdkn1a/Vldlr/Asns/Mthfd2/Psph/Coro1a/Shmt2/Mllt11/Hk2/Psat1/Nfil3/Pgm1/Rrm2/Tfrc/Bcat1/Slc1a4/Hspa9/Pik3r3/Etf1/Abcf2/Txnrd1/Fads1/Psmc2/Slc7a5/Pitpnb/Calr/Cacybp/Igfbp5/Psmc4/Psmd13/Cyp51/Tubg1/Phgdh/Gapdh/Sdf2l1/Nfkbib/Hprt/Psma3/Fkbp2/Arpc5l/Tpi1/Eef1e1
HALLMARK_UNFOLDED_PROTEIN_RESPONSE	HALLMARK_UNFOLDED_PROTEIN_RESPONSE	HALLMARK_UNFOLDED_PROTEIN_RESPONSE	75	0.49807	2.17619	2.10901e-05	0.000525051	0.000397933	964	tags=32%, list=13%, signal=28%	Chac1/Cebpb/Asns/Eif4ebp1/Mthfd2/Tubb2a/Herpud1/Stc2/Iars/Vegfa/Psat1/Tars/Atf4/Atf3/Slc1a4/Exosc4/Hspa9/Lsm4/Slc7a5/Calr/Nhp2/Kif5b/Cebpg/Cks1b
HALLMARK_MYC_TARGETS_V1	HALLMARK_MYC_TARGETS_V1	HALLMARK_MYC_TARGETS_V1	139	0.407484	2.02506	3.15031e-05	0.000525051	0.000397933	2659	tags=75%, list=34%, signal=50%	Iars/Nme1/Psmb2/Cox5a/Etf1/Psmd8/Rps2/Usp1/Lsm2/Ctps/Srsf7/Clns1a/Psmb3/Nhp2/Snrpa1/Cdc45/Psmc4/U2af1/Txnl4a/Ran/Rsl1d1/Tfdp1/Hprt/Ranbp1/Psma2/Ncbp1/Psma7/Eif4e/Npm1/Orc2/Snrpd1/Ube2l3/Srsf3/Sf3a1/Rack1/Ywhaq/Psmd14/Cct7/Cyc1/Ssb/Eif3d/Eif4g2/Psma4/Srpk1/Rrm1/Nolc1/Smarcc1/Uba2/Mrpl23/Hnrnpd/Cul1/Pgk1/Mcm2/Rps10/Aimp2/Vdac3/Fbl/Ndufab1/Eif2s2/Gspt1/Eef1b2/Psmd7/Eif2s1/Prdx3/Psmd3/Ifrd1/C1qbp/Xpo…
HALLMARK_E2F_TARGETS	HALLMARK_E2F_TARGETS	HALLMARK_E2F_TARGETS	121	0.371823	1.81406	0.000754678	0.00943347	0.00714958	2176	tags=51%, list=28%, signal=37%	Cdkn1a/Mthfd2/Ccne1/Spc24/Psmc3ip/Rrm2/Tfrc/Phf5a/Nme1/Donson/Mxd3/Tipin/Jpt1/Nudt21/Cdc25b/Asf1b/Tk1/Birc5/Usp1/Ctps/Mybl2/Rad51ap1/Cdca3/Tubb5/Ak2/Cks1b/Tubg1/Ran/Hmgb3/Orc6/Ranbp1/Slbp/Cdk1/Pole4/Cdca8/Cenpm/Orc2/Racgap1/Dck/Anp32e/Ube2s/Trp53/Trip13/Nolc1/Hnrnpd/Lyar/Mcm2/E2f8/Snrpb/Ezh2/Gspt1/Eif2s1/Nasp/Prps1/Pop7/Tmpo/Nop56/Syncrip/Psip1/Dut/Ctcf/Asf1a
HALLMARK_HYPOXIA	HALLMARK_HYPOXIA	HALLMARK_HYPOXIA	106	0.363399	1.70661	0.00187385	0.0187385	0.0142018	570	tags=23%, list=7%, signal=21%	Slc6a6/Angptl4/Pgf/Cdkn1a/Vldlr/Ncan/Cdkn1c/Dpysl4/Sdc3/Stc2/Hmox1/Galk1/Vegfa/Ier3/Hk2/Ccn1/Chst2/Nfil3/Fos/Pgm1/Atf3/Tpst2/Bcan/Egfr
HALLMARK_BILE_ACID_METABOLISM	HALLMARK_BILE_ACID_METABOLISM	HALLMARK_BILE_ACID_METABOLISM	45	-0.502727	-1.77016	0.00383393	0.0319494	0.0242143	1409	tags=38%, list=18%, signal=31%	Abcd3/Npc1/Pxmp2/Abcd2/Bcar3/Cyp39a1/Paox/Crot/Pex6/Pfkm/Aldh9a1/Slc29a1/Hsd17b11/Lipe/Nr3c2/Hacl1/Ttr
HALLMARK_UV_RESPONSE_UP	HALLMARK_UV_RESPONSE_UP	HALLMARK_UV_RESPONSE_UP	84	0.366569	1.62785	0.00565452	0.0353408	0.0267846	653	tags=24%, list=8%, signal=22%	Pdlim3/Asns/Cdkn1c/Kcnh2/Ccnd3/Hmox1/Ccne1/Lhx2/Plcl1/Tars/Junb/Cdc34/Fos/Cyb5r1/Tfrc/Sod2/Atf3/Ppif/Ppp1r2/Amd1
HALLMARK_P53_PATHWAY	HALLMARK_P53_PATHWAY	HALLMARK_P53_PATHWAY	106	0.343529	1.6133	0.00497435	0.0353408	0.0267846	774	tags=24%, list=10%, signal=22%	Nupr1/Cd82/Cdkn1a/Plk3/Rgs16/Ccnd3/Slc3a2/Hmox1/Traf4/Ier3/Sdc1/Tpd52l1/Fos/Aen/Atf3/Rnf19b/Notch1/Hras/Nhlh2/Baiap2/Ada/Wrap73/Ninj1/Cdk5r1/Hint1
HALLMARK_INTERFERON_ALPHA_RESPONSE	HALLMARK_INTERFERON_ALPHA_RESPONSE	HALLMARK_INTERFERON_ALPHA_RESPONSE	23	-0.596475	-1.83145	0.00757441	0.0420801	0.0318923	1362	tags=48%, list=18%, signal=39%	Pnpt1/Irf2/Ripk2/Lpar6/Ifitm2/Txnip/Parp12/Cnp/Eif2ak2/Plscr1/Ifi27
HALLMARK_EPITHELIAL_MESENCHYMAL_TRANSITION	HALLMARK_EPITHELIAL_MESENCHYMAL_TRANSITION	HALLMARK_EPITHELIAL_MESENCHYMAL_TRANSITION	71	-0.403206	-1.54162	0.0129875	0.0649375	0.0492158	1200	tags=31%, list=16%, signal=26%	Itgav/Sfrp1/Fstl1/Cdh11/Efemp2/Plod1/Htra1/Myl9/Jun/Notch2/Vegfc/Gja1/Eln/Col11a1/Cd44/Fn1/Spock1/Nt5e/Eno2/Col5a2/Lama2/Wnt5a
HALLMARK_PANCREAS_BETA_CELLS	HALLMARK_PANCREAS_BETA_CELLS	HALLMARK_PANCREAS_BETA_CELLS	19	0.579049	1.85902	0.0155355	0.0706159	0.0535194	619	tags=32%, list=8%, signal=29%	Isl1/Syt13/Dcx/Neurod1/Srp9/Insm1
HALLMARK_TNFA_SIGNALING_VIA_NFKB	HALLMARK_TNFA_SIGNALING_VIA_NFKB	HALLMARK_TNFA_SIGNALING_VIA_NFKB	85	0.337715	1.50722	0.0181279	0.0755329	0.057246	755	tags=27%, list=10%, signal=25%	Cebpb/Cdkn1a/Tubb2a/Hes1/Vegfa/Ier3/Ccn1/Dusp4/Junb/Nfil3/Eif1/Egr1/Egr2/Fos/Pmepa1/Sod2/Atf3/Rnf19b/Yrdc/Ehd1/Ninj1/Dusp5/Ier2
HALLMARK_COMPLEMENT	HALLMARK_COMPLEMENT	HALLMARK_COMPLEMENT	69	-0.384319	-1.46877	0.0413885	0.159187	0.120647	807	tags=23%, list=10%, signal=21%	Zfpm2/Prcp/Pclo/Gnb4/Spock2/Casp7/Fn1/Anxa5/Plscr1/L3mbtl4/Ctso/Mt3/S100a13/Gca/Dock9/Hspa1a
HALLMARK_TGF_BETA_SIGNALING	HALLMARK_TGF_BETA_SIGNALING	HALLMARK_TGF_BETA_SIGNALING	29	0.455751	1.62668	0.0455834	0.162798	0.123384	1101	tags=38%, list=14%, signal=33%	Cdkn1c/Id1/Junb/Apc/Pmepa1/Slc20a1/Sptbn1/Smad7/Hipk2/Rab31/Ifngr2
HALLMARK_HEDGEHOG_SIGNALING	HALLMARK_HEDGEHOG_SIGNALING	HALLMARK_HEDGEHOG_SIGNALING	22	0.430093	1.42501	0.103125	0.300926	0.22807	749	tags=27%, list=10%, signal=25%	Vldlr/L1cam/Unc5c/Vegfa/Rtn1/Cdk5r1
HALLMARK_NOTCH_SIGNALING	HALLMARK_NOTCH_SIGNALING	HALLMARK_NOTCH_SIGNALING	19	-0.480677	-1.41937	0.101644	0.300926	0.22807	821	tags=32%, list=11%, signal=28%	Psen2/Maml2/Notch2/Fzd7/Tcf7l2/Wnt5a
HALLMARK_INFLAMMATORY_RESPONSE	HALLMARK_INFLAMMATORY_RESPONSE	HALLMARK_INFLAMMATORY_RESPONSE	42	-0.394296	-1.36722	0.0906516	0.300926	0.22807	465	tags=38%, list=6%, signal=36%	Klf6/Ifnar1/Ptpre/Mxd1/Slc31a2/Ripk2/Slc1a2/Slc4a4/Has2/Eif2ak2/Gpc3/Itgb8/Calcrl/Pdpn/Il18/Scn1b
HALLMARK_ESTROGEN_RESPONSE_LATE	HALLMARK_ESTROGEN_RESPONSE_LATE	HALLMARK_ESTROGEN_RESPONSE_LATE	79	0.285495	1.25339	0.108333	0.300926	0.22807	1095	tags=28%, list=14%, signal=24%	Pdlim3/Cxcl14/Mest/Ccna1/Rps6ka2/Ckb/Unc13b/Tpd52l1/Fos/Idh2/Slc1a4/Ppif/Fabp5/Siah2/Large1/Homer2/Slc7a5/Rab31/Celsr2/Nxt1/Olfm1/Hprt
HALLMARK_FATTY_ACID_METABOLISM	HALLMARK_FATTY_ACID_METABOLISM	HALLMARK_FATTY_ACID_METABOLISM	74	-0.339773	-1.30922	0.119681	0.31495	0.238699	1781	tags=30%, list=23%, signal=23%	Bckdhb/Crat/Gpd2/Acot2/Adsl/Nthl1/Mcee/Acadm/Pts/Hadh/Acaa1a/Cryz/Suclg2/Ech1/Eno3/Gabarapl1/Aldh9a1/Cpt2/Hsd17b11/Car4/Eno2/S100a10
HALLMARK_GLYCOLYSIS	HALLMARK_GLYCOLYSIS	HALLMARK_GLYCOLYSIS	110	0.248007	1.17213	0.171569	0.428922	0.325077	380	tags=12%, list=5%, signal=11%	Angptl4/Chst5/Vldlr/Dpysl4/Sdc3/Stc2/Qsox1/Galk1/Vegfa/Ier3/Sdc1/Hk2/Chst2
HALLMARK_MYC_TARGETS_V2	HALLMARK_MYC_TARGETS_V2	HALLMARK_MYC_TARGETS_V2	31	0.332754	1.22244	0.196319	0.463458	0.351252	3366	tags=81%, list=44%, signal=46%	Hk2/Bysl/Mrto4/Npm1/Mphosph10/Nolc1/Wdr74/Pus1/Aimp2/Farsa/Noc4l/Grwd1/Tmem97/Sord/Nop56/Nop2/Mcm4/Imp4/Cdk4/Ipo4/Las1l/Pes1/Prmt3/Ung/Pprc1
HALLMARK_KRAS_SIGNALING_UP	HALLMARK_KRAS_SIGNALING_UP	HALLMARK_KRAS_SIGNALING_UP	66	0.272109	1.17759	0.203922	0.463458	0.351252	832	tags=21%, list=11%, signal=19%	Angptl4/Gadd45g/Igf2/Tmem176b/Ccser2/Rgs16/Trib2/Yrdc/Tmem158/Prelid3b/Epb41l3/Bpgm/Reln/Mmd
