# Supplementary material for: PTEN restrains SHH medulloblastoma growth through cell autonomous and nonautonomous mechanisms
Source: eLife. 2026 Apr 17;14:RP108190. doi: 10.7554/eLife.108190 (PMC13090030; doi:10.7554/eLife.108190)
Supplement: Figure 9—figure supplement 1—source data 2. — Related to Figure 9—figure supplement 1B. [file elife-108190-fig9-figsupp1-data2.xlsx]

## Sheet: Figure 9-Supp-1-source data 2
Figure 9-Supplemental 1-source data 2. GSEA analysis of Gene Ontology terms of DEG gene list of GCP-like cells in SmoM2; Ptenfl/fl compared with SmoM2 tumors. Related to Figure 9-Supplemental 1B.
GO terms	ID	Description	setSize	enrichmentScore	NES	pvalue	p.adjust	qvalue	rank	leading_edge	core_enrichment
GO:0007420	GO:0007420	brain development	346	0.346652	1.90756	1.61485e-08	6.83565e-05	6.15512e-05	740	tags=19%, list=10%, signal=18%	16392/15208/140486/18742/16565/20370/67749/270190/12140/233552/58208/18845/22773/230025/214968/18996/22151/20510/22253/18013/13388/12805/16975/114873/15205/107503/94187/78286/77630/59058/21367/56527/18795/16870/234734/279653/239857/100182/23790/50913/13654/332397/13640/269116/13193/56747/18212/104001/12032/13649/11803/18128/18012/57752/18072/67254/18223/20319/73750/69539/66155/268902/67263/18475/…
GO:0060322	GO:0060322	head development	379	0.326852	1.80668	1.34976e-07	0.000285676	0.000257236	740	tags=18%, list=10%, signal=17%	16392/15208/140486/18742/16565/20370/67749/270190/12140/233552/58208/18845/22773/230025/214968/18996/22151/20510/22253/18013/13388/12805/16975/114873/15205/107503/94187/78286/77630/59058/21367/20289/56527/18795/16870/234734/279653/239857/100182/23790/50913/21380/22682/13654/332397/13640/269116/13193/56747/18212/104001/12032/13649/11803/18128/18012/57752/18072/67254/18223/20319/73750/69539/66155/2…
GO:0030900	GO:0030900	forebrain development	198	0.3761	1.91646	4.73198e-06	0.00522699	0.00470661	870	tags=22%, list=12%, signal=20%	16392/15208/140486/16565/67749/12140/233552/58208/22773/230025/18996/22151/16975/15205/107503/77630/59058/21367/18795/16870/100182/23790/50913/13193/18212/12032/13649/11803/18128/18012/57752/18072/67254/18223/268902/67263/12569/70223/73710/19699/22417/20187/16653/216850
GO:0006935	GO:0006935	chemotaxis	210	0.350126	1.81801	7.40891e-06	0.00522699	0.00470661	913	tags=27%, list=12%, signal=25%	16392/13842/270190/18654/58208/18845/102545/14456/57266/16728/214968/16985/23964/12721/22253/16776/26757/14388/12805/114873/277360/58235/13508/21367/22339/16870/16007/16911/14432/18810/13641/13654/20358/13640/269116/70031/107515/22152/19242/18128/18053/22323/225743/18081/268902/11785/12569/545156/13052/73710/19699/66146/20187/12317/16573/14026/215999
GO:0042330	GO:0042330	taxis	210	0.350126	1.81801	7.40891e-06	0.00522699	0.00470661	913	tags=27%, list=12%, signal=25%	16392/13842/270190/18654/58208/18845/102545/14456/57266/16728/214968/16985/23964/12721/22253/16776/26757/14388/12805/114873/277360/58235/13508/21367/22339/16870/16007/16911/14432/18810/13641/13654/20358/13640/269116/70031/107515/22152/19242/18128/18053/22323/225743/18081/268902/11785/12569/545156/13052/73710/19699/66146/20187/12317/16573/14026/215999
GO:0007417	GO:0007417	central nervous system development	467	0.282211	1.58976	6.00731e-06	0.00522699	0.00470661	740	tags=17%, list=10%, signal=16%	16392/15208/140486/18742/16565/20370/67749/270190/12140/233552/58208/18845/22773/22359/230025/214968/20848/18996/22151/20510/22253/18013/13388/12805/16975/114873/27140/13389/15205/107503/94187/78286/77630/59058/21367/56527/18795/20681/16870/234734/279653/239857/16911/14432/100182/23790/50913/21380/13654/332397/13640/269116/13193/56747/18212/20742/104001/19242/12032/20666/13649/11803/18128/18053/1…
GO:0051093	GO:0051093	negative regulation of developmental process	403	0.281615	1.56162	1.94358e-05	0.0117531	0.010583	640	tags=15%, list=9%, signal=15%	16392/15208/230126/18742/67749/270190/11516/81703/12575/16526/14456/57266/16002/214968/20848/18013/65963/22761/13388/12677/27140/13389/15901/15245/15205/107503/239114/20856/72147/360213/72828/21367/106014/20681/22339/217410/16870/242705/50913/21380/629378/11789/20358/19158/22042/269951/20656/67525/18102/77889/19242/15526/20666/13649/18128/18053/93960/14297/12048/107392/227721/20319
GO:0014014	GO:0014014	negative regulation of gliogenesis	28	0.659226	2.41665	3.05552e-05	0.0117872	0.0106137	564	tags=36%, list=8%, signal=33%	15208/18742/11516/13389/15205/107503/269951/19242/20666/18128
GO:0045165	GO:0045165	cell fate commitment	92	0.447346	2.04975	3.34152e-05	0.0117872	0.0106137	640	tags=27%, list=9%, signal=25%	16392/15208/216848/58208/20848/18996/13592/13388/12677/27140/13389/23805/15205/20681/16911/14432/50913/21380/11789/225631/20672/18128/18012/17927/20319
GO:0048863	GO:0048863	stem cell differentiation	107	0.43169	2.00124	3.29558e-05	0.0117872	0.0106137	656	tags=21%, list=9%, signal=20%	16392/15208/216848/22773/214968/20848/16776/15205/20681/23790/13641/21380/20358/68479/77889/20672/19242/15526/20666/18128/20319/68219/234267
GO:0009617	GO:0009617	response to bacterium	143	-0.437848	-1.88118	2.79531e-05	0.0117872	0.0106137	1114	tags=26%, list=15%, signal=22%	16410/13057/26874/235504/545370/192656/66824/14824/14455/106869/68810/12633/22782/67248/67067/18129/12369/19211/18760/240354/100040462/19106/22038/17260/235527/14734/269855/70097/225471/15064/56615/16159/15122/16173/22418/217480/110257
GO:0048812	GO:0048812	neuron projection morphogenesis	378	0.28651	1.5863	2.85218e-05	0.0117872	0.0106137	745	tags=19%, list=10%, signal=18%	16392/140486/13842/16880/270190/58208/18845/22359/18164/16728/214968/23964/22253/229791/16776/26757/18039/80883/12805/16975/114873/71751/15901/360213/241134/77630/58235/59058/13508/21367/211134/19339/22339/16870/110834/56320/16911/14432/13641/20450/18040/11789/13654/20358/13640/269116/13193/107515/22152/18212/17755/19242/12032/13649/11803/18128/18053/16885/22323/108100/14297/18223/13823/225743/23…
GO:0043388	GO:0043388	positive regulation of DNA binding	22	0.703561	2.40058	6.07107e-05	0.0135257	0.0121791	918	tags=36%, list=12%, signal=32%	16392/18996/15205/77006/18102/18012/15258/72400
GO:0045665	GO:0045665	negative regulation of neuron differentiation	39	0.585876	2.28803	5.60005e-05	0.0135257	0.0121791	342	tags=21%, list=5%, signal=20%	16392/15208/13388/27140/15205/21367/20681/50913
GO:0062208	GO:0062208	positive regulation of pattern recognition receptor signaling pathway	18	-0.737286	-2.13119	4.80452e-05	0.0135257	0.0121791	220	tags=28%, list=3%, signal=27%	78781/30936/225471/193740/15511
GO:0097485	GO:0097485	neuron projection guidance	118	0.407051	1.92104	5.60698e-05	0.0135257	0.0121791	904	tags=34%, list=12%, signal=30%	16392/13842/270190/58208/18845/16728/214968/23964/22253/16776/26757/12805/114873/58235/13508/21367/22339/16870/16911/14432/13641/13654/20358/13640/269116/107515/22152/18128/18053/22323/225743/268902/11785/12569/545156/73710/19699/20187/16573/14026
GO:1901214	GO:1901214	regulation of neuron death	210	0.329131	1.709	5.33279e-05	0.0135257	0.0121791	867	tags=21%, list=12%, signal=19%	16392/56312/14812/18742/12608/270190/100102/72930/20848/18996/20510/12721/66922/16443/12123/18039/15368/22339/234734/11692/20450/216150/21981/13653/14281/11911/20656/18212/319801/18053/15461/12048/56461/12569/11799/68815/17865/66208/80890/23988/17748/15258/16653/22192
GO:0048667	GO:0048667	cell morphogenesis involved in neuron differentiation	343	0.286622	1.57778	5.97057e-05	0.0135257	0.0121791	650	tags=17%, list=9%, signal=16%	16392/140486/13842/270190/58208/18845/22359/18164/16728/214968/23964/22253/229791/16776/18039/80883/12805/16975/114873/71751/15901/15205/360213/77630/58235/59058/13508/21367/211134/19339/22339/16870/110834/56320/16911/14432/13641/18040/11789/13654/20358/13640/269116/13193/107515/22152/18212/17755/19242/11803/18128/18053/16885/22323/108100/14297/18223/73750/225743
GO:0120039	GO:0120039	plasma membrane bounded cell projection morphogenesis	389	0.279222	1.5571	4.36855e-05	0.0135257	0.0121791	745	tags=19%, list=10%, signal=18%	16392/140486/13842/16880/270190/58208/18845/22359/18164/16728/214968/23964/22253/229791/16776/26757/18039/80883/12805/16975/114873/71751/15901/360213/241134/77630/58235/59058/13508/21367/211134/19339/22339/16870/110834/56320/16911/14432/23790/13641/20450/18040/11789/13654/20358/13640/269116/13193/107515/22152/18212/17755/19242/12032/13649/11803/18128/18053/16885/22323/108100/14297/18223/13823/225…
GO:0048469	GO:0048469	cell maturation	72	0.484284	2.11574	6.58734e-05	0.0139421	0.0125541	528	tags=22%, list=7%, signal=21%	15208/13842/230126/12577/71751/54352/15205/20112/18987/21367/18795/20681/22339/269116/23859/20672
GO:0048858	GO:0048858	cell projection morphogenesis	391	0.278008	1.55197	6.95504e-05	0.0140194	0.0126237	745	tags=19%, list=10%, signal=18%	16392/140486/13842/16880/270190/58208/18845/22359/18164/16728/214968/23964/22253/229791/16776/26757/18039/80883/12805/16975/114873/71751/15901/360213/241134/77630/58235/59058/13508/21367/211134/19339/22339/16870/110834/56320/16911/14432/23790/13641/20450/18040/11789/13654/20358/13640/269116/13193/107515/22152/18212/17755/19242/12032/13649/11803/18128/18053/16885/22323/108100/14297/18223/13823/225…
GO:0000904	GO:0000904	cell morphogenesis involved in differentiation	376	0.283208	1.56382	7.2883e-05	0.0140234	0.0126272	650	tags=17%, list=9%, signal=16%	16392/140486/13842/270190/58208/18845/22359/18164/16728/20733/214968/23964/22253/22761/229791/16776/18039/80883/12805/16975/114873/71751/15901/15205/72333/360213/77630/58235/59058/13508/21367/211134/19339/22339/16870/110834/56320/16911/14432/13641/18040/11789/13654/20358/13640/11911/269116/13193/107515/22152/18212/17755/19242/11803/18128/18053/16885/22323/108100/14297/18223/73750/225743
GO:0007411	GO:0007411	axon guidance	117	0.39957	1.88603	9.21462e-05	0.0162523	0.0146343	904	tags=33%, list=12%, signal=30%	16392/13842/270190/58208/18845/16728/214968/23964/22253/16776/12805/114873/58235/13508/21367/22339/16870/16911/14432/13641/13654/20358/13640/269116/107515/22152/18128/18053/22323/225743/268902/11785/12569/545156/73710/19699/20187/16573/14026
GO:0007167	GO:0007167	enzyme-linked receptor protein signaling pathway	394	0.268465	1.4922	9.14994e-05	0.0162523	0.0146343	661	tags=17%, list=9%, signal=16%	15208/14176/13842/14783/16880/270190/18654/14456/230899/13685/16002/20848/12577/13388/76829/14388/15901/15245/104215/15205/58250/94187/12445/72828/29816/20289/18795/22339/18709/110834/16007/13641/20419/22682/11789/13653/20358/14281/65112/13640/12830/23921/17826/225631/18212/68818/20742/20666/18710/13649/18128/18053/68431/15461/56436/70294/19349/170749/14678/107392/20319/19246/192192/225743/353310…
GO:0007409	GO:0007409	axonogenesis	247	0.318025	1.67299	0.000103138	0.0174633	0.0157247	730	tags=21%, list=10%, signal=20%	16392/13842/270190/58208/18845/18164/16728/214968/23964/22253/229791/16776/18039/80883/12805/114873/71751/360213/77630/58235/59058/13508/21367/19339/22339/16870/56320/16911/14432/13641/18040/11789/13654/20358/13640/269116/13193/107515/22152/18212/17755/11803/18128/18053/16885/22323/14297/18223/225743/268902/11858/11785/12569
GO:0008284	GO:0008284	positive regulation of cell population proliferation	374	0.280913	1.55703	0.000134542	0.0219044	0.0197237	672	tags=17%, list=9%, signal=16%	16392/15208/14176/18742/16880/11516/18654/12575/14456/16002/20848/102060/12721/13388/12677/66190/66993/15901/108037/15205/94187/12445/68337/15368/12447/20289/20681/22339/16870/16007/22209/68039/13641/72080/21380/13653/77006/22042/11987/11910/353156/18102/57914/18212/77889/16423/192156/73689/19242/66131/20666/13649/18128/18053/15461/53626/14297/12048/14678/20319/353310/22041/11486
GO:0061564	GO:0061564	axon development	273	0.303964	1.62373	0.000143846	0.0225519	0.0203067	730	tags=21%, list=10%, signal=19%	16392/13842/67749/270190/58208/18845/18164/16728/214968/23964/22253/229791/16776/18039/80883/12805/114873/71751/360213/77630/58235/59058/13508/21367/19339/22339/16870/56320/16911/14432/13641/18040/11789/13654/20358/13640/269116/13193/107515/22152/18212/17755/19242/11803/18128/18053/16885/22323/14297/18223/13823/225743/268902/11858/11785/12569
GO:0010562	GO:0010562	positive regulation of phosphorus metabolic process	338	0.280085	1.54365	0.000163657	0.0237122	0.0213515	858	tags=18%, list=12%, signal=17%	16392/15208/14176/13842/230784/14783/11516/18654/12575/109270/14456/22359/16002/20848/20510/14388/12805/16975/71751/15205/12445/22032/13508/22339/110834/16007/16911/22248/21987/21380/13653/13640/77006/22042/14077/18212/319801/21754/18710/13649/279561/15461/12048/20319/19246/12314/12531/22041/26399/16981/12569/11799/56013/68815/19699/23897/67468/23988/68197/15258/20187/16653
GO:0045937	GO:0045937	positive regulation of phosphate metabolic process	338	0.280085	1.54365	0.000163657	0.0237122	0.0213515	858	tags=18%, list=12%, signal=17%	16392/15208/14176/13842/230784/14783/11516/18654/12575/109270/14456/22359/16002/20848/20510/14388/12805/16975/71751/15205/12445/22032/13508/22339/110834/16007/16911/22248/21987/21380/13653/13640/77006/22042/14077/18212/319801/21754/18710/13649/279561/15461/12048/20319/19246/12314/12531/22041/26399/16981/12569/11799/56013/68815/19699/23897/67468/23988/68197/15258/20187/16653
GO:0032989	GO:0032989	cellular component morphogenesis	432	0.26431	1.47847	0.000168053	0.0237122	0.0213515	730	tags=18%, list=10%, signal=17%	16392/140486/13842/16880/270190/58208/18845/22359/18164/16728/214968/23964/22253/229791/16776/26757/18039/80883/12805/16975/114873/71751/15901/360213/241134/77630/58235/59058/13508/21367/211134/19339/22339/16870/68794/110834/13007/56320/16911/14432/23790/18810/13641/20450/18040/11789/13654/20358/13640/269116/13193/107515/22152/18212/17755/19242/12032/13649/11803/18128/18053/16885/22323/108100/142…
GO:0008593	GO:0008593	regulation of Notch signaling pathway	45	0.536994	2.17321	0.000235082	0.0316421	0.0284919	688	tags=29%, list=9%, signal=26%	69065/15208/233552/20848/13388/13389/15205/244418/228875/353156/18128/69638/268902
GO:0045664	GO:0045664	regulation of neuron differentiation	104	0.396218	1.83605	0.000239203	0.0316421	0.0284919	577	tags=17%, list=8%, signal=16%	16392/15208/233552/58208/18013/13388/71751/27140/15205/240843/21367/20681/50913/17755/20666/18128/18053/18012
GO:0032990	GO:0032990	cell part morphogenesis	405	0.27313	1.51788	0.000268896	0.034492	0.0310581	730	tags=18%, list=10%, signal=17%	16392/140486/13842/16880/270190/58208/18845/22359/18164/16728/214968/23964/22253/229791/16776/26757/18039/80883/12805/16975/114873/71751/15901/360213/241134/77630/58235/59058/13508/21367/211134/19339/22339/16870/110834/56320/16911/14432/23790/18810/13641/20450/18040/11789/13654/20358/13640/269116/13193/107515/22152/18212/17755/19242/12032/13649/11803/18128/18053/16885/22323/108100/14297/18223/120…
GO:0021537	GO:0021537	telencephalon development	138	0.35069	1.7031	0.000335637	0.0412544	0.0371472	870	tags=23%, list=12%, signal=21%	15208/140486/16565/67749/58208/22773/22151/16975/15205/107503/77630/59058/21367/18795/16870/23790/13193/18212/12032/13649/18012/57752/67254/18223/268902/67263/12569/70223/73710/19699/20187/216850
GO:0045596	GO:0045596	negative regulation of cell differentiation	289	0.295024	1.59548	0.000341106	0.0412544	0.0371472	564	tags=15%, list=8%, signal=14%	16392/15208/230126/18742/270190/11516/81703/57266/16002/214968/20848/65963/22761/13388/12677/27140/13389/15901/15205/107503/239114/72147/360213/72828/21367/20681/22339/217410/16870/50913/21380/629378/20358/269951/20656/67525/18102/77889/19242/15526/20666/13649/18128
GO:0061351	GO:0061351	neural precursor cell proliferation	112	0.388995	1.81236	0.000385517	0.0453304	0.0408175	661	tags=22%, list=9%, signal=21%	140486/18742/270190/11516/12140/20733/12677/66993/15245/107503/94187/22339/16870/56320/100182/20419/19242/18128/18053/57752/53626/18223/14678/69539/22041
GO:0010721	GO:0010721	negative regulation of cell development	127	0.369455	1.77152	0.00042858	0.0490318	0.0441504	564	tags=20%, list=8%, signal=19%	15208/230126/18742/11516/214968/65963/22761/12677/13389/15901/15205/107503/239114/72147/360213/72828/22339/16870/20358/269951/18102/19242/15526/20666/18128
GO:0048821	GO:0048821	erythrocyte development	19	-0.669698	-1.97097	0.000462314	0.0501789	0.0451833	34	tags=16%, list=0%, signal=16%	319653/15122/110257
GO:0043523	GO:0043523	regulation of neuron apoptotic process	158	0.344847	1.7151	0.000454365	0.0501789	0.0451833	867	tags=21%, list=12%, signal=19%	16392/56312/18742/12608/100102/72930/18996/20510/12721/16443/12123/18039/15368/22339/234734/216150/13653/11911/20656/18212/18053/15461/12048/56461/12569/11799/17865/80890/23988/17748/15258/16653/22192
GO:0007219	GO:0007219	Notch signaling pathway	80	0.432471	1.91474	0.000479025	0.0506929	0.0456461	688	tags=24%, list=9%, signal=22%	69065/15208/233552/20848/13388/12805/13389/15205/94187/244418/234214/227325/228875/353156/18128/11746/69638/433586/268902
GO:0070997	GO:0070997	neuron death	239	0.306695	1.61541	0.000507059	0.0523507	0.0471389	867	tags=20%, list=12%, signal=18%	16392/56312/14812/18742/12608/270190/100102/72930/20848/18996/20510/12721/66922/26757/16443/12123/18039/15368/22339/234734/11692/20450/216150/21981/13653/14281/11911/20656/18212/319801/18053/15461/12048/56461/70369/12569/11799/68815/20438/17865/66208/80890/23988/17748/15258/16653/22192
GO:0086010	GO:0086010	membrane depolarization during action potential	12	-0.751172	-1.97346	0.000521415	0.0525512	0.0473194	253	tags=42%, list=3%, signal=40%	110876/12289/12296/72821/20266
GO:0097150	GO:0097150	neuronal stem cell population maintenance	18	0.692653	2.2928	0.000556132	0.0547467	0.0492963	182	tags=22%, list=2%, signal=22%	15208/140486/13388/15205
GO:0035066	GO:0035066	positive regulation of histone acetylation	13	0.742277	2.18882	0.000664963	0.0598891	0.0539268	1	tags=8%, list=0%, signal=8%	16392
GO:0048710	GO:0048710	regulation of astrocyte differentiation	15	0.700674	2.1859	0.000627677	0.0598891	0.0539268	244	tags=33%, list=3%, signal=32%	15208/13389/15205/107503/21367
GO:0090169	GO:0090169	regulation of spindle assembly	15	-0.707885	-1.94557	0.000642918	0.0598891	0.0539268	14	tags=20%, list=0%, signal=20%	73420/193740/15511
GO:0001934	GO:0001934	positive regulation of protein phosphorylation	281	0.27463	1.49485	0.000652689	0.0598891	0.0539268	858	tags=17%, list=12%, signal=16%	16392/15208/14176/230784/11516/18654/12575/109270/14456/22359/16002/20510/14388/12805/16975/71751/15205/12445/22032/22339/110834/16007/22248/21987/21380/13653/13640/77006/22042/18212/21754/18710/13649/279561/15461/20319/19246/12531/26399/16981/12569/11799/56013/19699/23897/67468/23988/15258/16653
GO:0099536	GO:0099536	synaptic signaling	393	0.256925	1.43072	0.000688105	0.0606823	0.054641	824	tags=21%, list=11%, signal=19%	21366/14812/20370/270190/29867/11516/237611/19293/18164/435145/230899/54377/16728/20848/13004/23964/20510/14395/18013/231207/23934/381677/229791/81840/14406/14299/18039/80883/12297/16975/12890/21367/211134/234214/18795/19339/227120/110834/242667/22249/56320/242425/12290/13653/11911/226180/30794/107065/228836/23859/18212/16592/19242/14672/232227/13649/18053/18196/15461/108100/12048/64051/109305/14…
GO:0042327	GO:0042327	positive regulation of phosphorylation	312	0.281415	1.5578	0.00074266	0.0637959	0.0574446	858	tags=18%, list=12%, signal=17%	16392/15208/14176/13842/230784/14783/11516/18654/12575/109270/14456/22359/16002/20510/14388/12805/16975/71751/15205/12445/22032/13508/22339/110834/16007/16911/22248/21987/21380/13653/13640/77006/22042/18212/319801/21754/18710/13649/279561/15461/20319/19246/12531/22041/26399/16981/12569/11799/56013/68815/19699/23897/67468/23988/15258/20187/16653
GO:0001932	GO:0001932	regulation of protein phosphorylation	462	0.248193	1.38351	0.000753554	0.0637959	0.0574446	858	tags=17%, list=12%, signal=16%	16392/15208/14176/230784/230126/11516/18654/12575/109270/23882/14456/22359/230899/244923/16002/12577/20510/12427/14388/12805/16975/71751/15205/12445/72828/66259/22032/12447/22339/217410/110834/16007/171580/23790/18810/22248/21987/21380/11789/13653/65112/13640/77006/22042/19099/19720/18212/21754/56513/18710/13649/333433/279561/15461/53626/68045/20319/19246/12531/26399/16981/18754/12569/11799/56013…
GO:0021545	GO:0021545	cranial nerve development	21	0.63503	2.14411	0.000778628	0.0646261	0.0581922	402	tags=33%, list=5%, signal=32%	16392/270190/18996/15205/78286/21380/13654
GO:0032615	GO:0032615	interleukin-12 production	12	0.749011	2.11094	0.00080684	0.0656687	0.059131	508	tags=25%, list=7%, signal=23%	16392/18795/16423
GO:0090497	GO:0090497	mesenchymal cell migration	26	0.582821	2.07037	0.000822217	0.0656687	0.059131	406	tags=31%, list=5%, signal=29%	16392/214968/16776/20681/23790/13641/21380/20358
GO:0032655	GO:0032655	regulation of interleukin-12 production	11	0.759196	2.13541	0.00095031	0.071742	0.0645996	508	tags=27%, list=7%, signal=25%	16392/18795/16423
GO:1901985	GO:1901985	positive regulation of protein acetylation	21	0.62877	2.12298	0.000916435	0.071742	0.0645996	1	tags=5%, list=0%, signal=5%	16392
GO:0035065	GO:0035065	regulation of histone acetylation	25	0.593212	2.07731	0.00096605	0.071742	0.0645996	1	tags=4%, list=0%, signal=4%	16392
GO:0050731	GO:0050731	positive regulation of peptidyl-tyrosine phosphorylation	63	0.425844	1.82396	0.000954104	0.071742	0.0645996	412	tags=16%, list=6%, signal=15%	16392/15208/14456/16002/12805/16975/15205/22339/22248/13640
GO:0010232	GO:0010232	vascular transport	11	-0.769558	-1.94707	0.000996843	0.071992	0.0648247	844	tags=64%, list=11%, signal=57%	26357/20525/14609/17250/20502/11816/18669
GO:0050830	GO:0050830	defense response to Gram-positive bacterium	15	-0.696358	-1.91389	0.00100343	0.071992	0.0648247	1001	tags=53%, list=13%, signal=46%	192656/66824/106869/67248/67067/269855/15064/16173
GO:0030326	GO:0030326	embryonic limb morphogenesis	56	-0.496131	-1.8184	0.00104154	0.0722758	0.0650803	1312	tags=41%, list=18%, signal=34%	269878/56758/21808/81896/21821/380718/234740/19165/216560/98711/244585/106633/18129/14609/58198/213081/70300/11695/14634/544696/230857/14734/22418
GO:0035113	GO:0035113	embryonic appendage morphogenesis	56	-0.496131	-1.8184	0.00104154	0.0722758	0.0650803	1312	tags=41%, list=18%, signal=34%	269878/56758/21808/81896/21821/380718/234740/19165/216560/98711/244585/106633/18129/14609/58198/213081/70300/11695/14634/544696/230857/14734/22418
GO:0001755	GO:0001755	neural crest cell migration	25	0.58617	2.05265	0.00116943	0.0785743	0.0707517	406	tags=32%, list=5%, signal=30%	16392/214968/16776/20681/23790/13641/21380/20358
GO:0060537	GO:0060537	muscle tissue development	185	0.3026	1.53395	0.00116594	0.0785743	0.0707517	476	tags=15%, list=6%, signal=14%	16392/56312/270190/237611/16526/22773/16002/18996/22761/13388/20289/234214/20681/22339/16656/227325/13007/20467/18810/21380/22682/11789/13653/13654/14281/22634/11910
GO:2000758	GO:2000758	positive regulation of peptidyl-lysine acetylation	18	0.662676	2.19357	0.00144144	0.0798702	0.0719186	1	tags=6%, list=0%, signal=6%	16392
GO:0001709	GO:0001709	cell fate determination	15	0.679959	2.12128	0.00138646	0.0798702	0.0719186	182	tags=27%, list=2%, signal=26%	16392/13592/13389/15205
GO:0035914	GO:0035914	skeletal muscle cell differentiation	41	0.525126	2.08045	0.00127753	0.0798702	0.0719186	593	tags=34%, list=8%, signal=32%	56312/270190/20289/20681/16656/21380/13653/13654/14281/22634/11910/20666/18128/17927
GO:0032675	GO:0032675	regulation of interleukin-6 production	45	0.493627	1.9977	0.00143662	0.0798702	0.0719186	344	tags=20%, list=5%, signal=19%	16392/12608/11516/14456/20848/239114/18987/16007/68039
GO:0051101	GO:0051101	regulation of DNA binding	57	0.466453	1.97243	0.00125745	0.0798702	0.0719186	577	tags=21%, list=8%, signal=20%	16392/18996/15901/15205/15368/16870/77006/67087/18102/68040/20666/18012
GO:0034308	GO:0034308	primary alcohol metabolic process	20	-0.652044	-1.94801	0.00146701	0.0798702	0.0719186	1038	tags=45%, list=14%, signal=39%	19662/105014/98711/242864/29807/16531/66375/105501/22139
GO:0032757	GO:0032757	positive regulation of interleukin-8 production	18	-0.66388	-1.919	0.00133494	0.0798702	0.0719186	32	tags=33%, list=0%, signal=33%	101540/66824/16173/22418/193740/15511
GO:0002720	GO:0002720	positive regulation of cytokine production involved in immune response	18	-0.659261	-1.90566	0.00149061	0.0798702	0.0719186	1412	tags=56%, list=19%, signal=45%	18762/15275/192656/66824/16590/240354/20361/225471/16173/22418
GO:0042744	GO:0042744	hydrogen peroxide catabolic process	12	-0.724733	-1.90401	0.00129037	0.0798702	0.0719186	214	tags=25%, list=3%, signal=24%	17751/15122/101488143
GO:0150104	GO:0150104	transport across blood-brain barrier	10	-0.756753	-1.88307	0.00147239	0.0798702	0.0719186	844	tags=60%, list=11%, signal=53%	26357/20525/17250/20502/11816/18669
GO:0014013	GO:0014013	regulation of gliogenesis	60	0.439559	1.86575	0.00145789	0.0798702	0.0719186	564	tags=23%, list=8%, signal=22%	15208/18742/11516/13389/15205/107503/20681/50913/13654/269951/19242/20666/13649/18128
GO:0071695	GO:0071695	anatomical structure maturation	99	0.381871	1.75355	0.0014043	0.0798702	0.0719186	731	tags=20%, list=10%, signal=18%	15208/13842/230126/12577/71751/54352/15205/20112/18987/21367/18795/20681/22339/269116/23859/20672/18128/12531/12569/15078
GO:0021700	GO:0021700	developmental maturation	143	0.33801	1.65653	0.00129278	0.0798702	0.0719186	564	tags=17%, list=8%, signal=16%	15208/13842/230126/20370/12577/18013/18039/71751/54352/15205/20112/18987/21367/18795/20681/19339/22339/22249/269116/23859/56747/20672/12032/18128
GO:0071363	GO:0071363	cellular response to growth factor stimulus	259	0.273025	1.45648	0.00142234	0.0798702	0.0719186	847	tags=19%, list=11%, signal=18%	15208/14176/14783/18654/14456/20848/12577/12721/13388/76829/14388/15901/15245/15205/58250/94187/20289/22339/16007/56320/20419/21380/20257/13653/20358/14281/65112/17826/225631/18212/20666/13649/18128/18053/13660/68431/170749/107392/20319/19246/225743/353310/244654/18754/74769/17131/22417/23988/15258/50766
GO:0043066	GO:0043066	negative regulation of apoptotic process	413	0.247807	1.37758	0.00128442	0.0798702	0.0719186	858	tags=18%, list=12%, signal=17%	16392/56312/16880/57875/12608/11516/58208/12575/109270/14456/27053/18996/12795/20510/12721/13388/16443/18039/15901/15245/107503/58250/64209/15368/29816/20289/20681/22339/234734/15937/16007/11692/171580/21380/11789/77006/22042/74178/20656/19099/26897/78688/18611/18212/105675/13649/279561/18128/18053/18012/15461/14297/12048/14678/20319/19246/11486/70369/18754/11799/11740/20439/12122/74769/23897/224…
GO:0031401	GO:0031401	positive regulation of protein modification process	410	0.248768	1.37559	0.00139956	0.0798702	0.0719186	858	tags=15%, list=12%, signal=14%	16392/15208/56312/14176/230784/11516/18654/81703/12575/109270/14456/22359/16002/20510/211949/14388/12805/16975/71751/15205/12445/22032/22339/217410/110834/16007/66568/22248/66412/21987/21380/13653/13640/77006/22042/18212/21754/18710/13649/279561/15461/107392/20319/19246/12314/12531/26399/16981/68350/16898/12569/11799/56013/17131/19699/23897/13016/67468/20677/23988/15258/16653
GO:0030513	GO:0030513	positive regulation of BMP signaling pathway	14	0.675791	2.06473	0.00151136	0.0799697	0.0720082	650	tags=57%, list=9%, signal=52%	15208/15205/94187/16007/20666/18128/68431/225743
GO:0048864	GO:0048864	stem cell development	39	0.50199	1.96043	0.00155889	0.0814664	0.0733559	406	tags=23%, list=5%, signal=22%	16392/214968/16776/15205/20681/23790/13641/21380/20358
GO:0002082	GO:0002082	regulation of oxidative phosphorylation	14	0.673971	2.05917	0.0015863	0.0818879	0.0737354	717	tags=36%, list=10%, signal=32%	56312/102060/108037/105675/70556
GO:0060253	GO:0060253	negative regulation of glial cell proliferation	14	0.673624	2.0581	0.00166124	0.0847233	0.0762886	564	tags=43%, list=8%, signal=40%	11516/15205/269951/19242/20666/18128
GO:0031290	GO:0031290	retinal ganglion cell axon guidance	10	0.746296	2.03979	0.00172211	0.0863346	0.0777395	412	tags=40%, list=6%, signal=38%	16392/270190/22339/13640
GO:0042391	GO:0042391	regulation of membrane potential	207	-0.350465	-1.57686	0.00173363	0.0863346	0.0777395	865	tags=24%, list=12%, signal=22%	116837/110862/54403/14802/19085/17762/67885/16498/211468/12298/63959/16476/26875/14609/110893/15168/13483/98496/19211/110784/71653/16531/13048/56508/53623/11932/14403/53321/110876/14167/432442/16480/17260/235086/12289/23828/11555/72961/18213/13405/170738/14813/103172/14399/14394/238271/78977/12296/72821/20266
GO:0007186	GO:0007186	G protein-coupled receptor signaling pathway	184	-0.35382	-1.56814	0.00179524	0.0883633	0.0795662	649	tags=16%, list=9%, signal=15%	16004/244585/16438/14696/12323/170935/14369/109294/110784/56508/12614/105171/239217/93897/12289/230857/18577/14765/11816/11555/110789/54409/140795/54598/13429/268934/207474/217480/18545/64337
GO:1905456	GO:1905456	regulation of lymphoid progenitor cell differentiation	10	0.743818	2.03302	0.001846	0.0884494	0.0796438	649	tags=40%, list=9%, signal=37%	15208/15205/18128/68219
GO:0009125	GO:0009125	nucleoside monophosphate catabolic process	10	-0.748138	-1.86163	0.00188057	0.0884494	0.0796438	359	tags=40%, list=5%, signal=38%	22271/76654/23959/99586
GO:0007517	GO:0007517	muscle organ development	139	0.332318	1.61307	0.00186894	0.0884494	0.0796438	593	tags=18%, list=8%, signal=17%	16392/56312/270190/237611/16002/18996/22761/13388/16776/17932/20289/20681/16656/227325/20467/18810/21380/13653/13654/14281/22634/11910/20666/18128/17927
GO:0050673	GO:0050673	epithelial cell proliferation	183	0.300324	1.53407	0.0018366	0.0884494	0.0796438	659	tags=17%, list=9%, signal=16%	16392/15208/56312/12608/12140/18654/58208/16002/20848/12577/16776/15901/15205/15368/22339/21380/11789/353156/107515/18102/19242/20666/13649/18128/18053/15461/14160/12048/20319/353310/328949
GO:0089718	GO:0089718	amino acid import across plasma membrane	18	0.654782	2.16744	0.0019349	0.0900046	0.0810441	493	tags=33%, list=7%, signal=31%	11989/21366/20510/17254/11987/55963
GO:0001508	GO:0001508	action potential	59	-0.471849	-1.75568	0.00198839	0.0914877	0.0823795	737	tags=29%, list=10%, signal=26%	16498/12298/15168/13483/16531/56508/53321/110876/14167/16480/12289/18213/13405/170738/12296/72821/20266
GO:0051241	GO:0051241	negative regulation of multicellular organismal process	421	0.249759	1.38677	0.00201883	0.0918895	0.0827413	965	tags=22%, list=13%, signal=20%	15208/18742/12608/100102/11516/16526/14456/230899/214968/65963/22761/13388/208936/94212/12677/260315/12297/13389/15901/15245/15205/107503/94187/239114/20856/72147/15368/360213/72828/114886/106014/20681/22339/18709/217410/16870/227120/56320/242705/23790/68039/629378/11789/20358/11911/29811/269951/67525/19720/107515/18102/78688/19242/15526/20666/13649/279561/18128/18053/11746/14297/14678/107392/203…
GO:0042733	GO:0042733	embryonic digit morphogenesis	37	-0.524151	-1.80154	0.00213927	0.0963354	0.0867446	934	tags=38%, list=13%, signal=33%	81896/21821/380718/234740/216560/106633/14609/58198/70300/11695/14634/544696/230857/22418
GO:0006730	GO:0006730	one-carbon metabolic process	16	0.650939	2.07854	0.00218347	0.0966653	0.0870417	654	tags=44%, list=9%, signal=40%	216188/17768/108037/232087/17769/270685/14057
GO:0045686	GO:0045686	negative regulation of glial cell differentiation	15	0.660628	2.06097	0.00226078	0.0966653	0.0870417	183	tags=27%, list=2%, signal=26%	15208/13389/15205/107503
GO:0061323	GO:0061323	cell proliferation involved in heart morphogenesis	10	0.738668	2.01894	0.00224245	0.0966653	0.0870417	564	tags=40%, list=8%, signal=37%	16392/15205/21380/18128
GO:2000136	GO:2000136	regulation of cell proliferation involved in heart morphogenesis	10	0.738668	2.01894	0.00224245	0.0966653	0.0870417	564	tags=40%, list=8%, signal=37%	16392/15205/21380/18128
GO:0032620	GO:0032620	interleukin-17 production	10	-0.742093	-1.84659	0.00225959	0.0966653	0.0870417	145	tags=40%, list=2%, signal=39%	18761/15064/16159/16173
GO:0021517	GO:0021517	ventral spinal cord development	24	0.573566	1.97968	0.00234967	0.0975112	0.0878033	342	tags=25%, list=5%, signal=24%	16392/233552/22359/16975/16911/50913
GO:0051402	GO:0051402	neuron apoptotic process	181	0.308409	1.56788	0.0023285	0.0975112	0.0878033	867	tags=19%, list=12%, signal=17%	16392/56312/18742/12608/100102/72930/18996/20510/12721/16443/12123/18039/15368/22339/234734/216150/13653/11911/20656/18212/18053/15461/12048/56461/12569/11799/20438/17865/80890/23988/17748/15258/16653/22192
GO:0007155	GO:0007155	cell adhesion	477	0.236385	1.34175	0.00232445	0.0975112	0.0878033	565	tags=15%, list=8%, signal=15%	15208/13842/230126/12608/270190/18845/21683/14456/20868/170736/16728/20733/16002/13004/23964/12721/76293/13388/208936/16776/94212/12587/80883/12805/114873/66993/20970/277360/15205/17909/20713/77976/72333/72828/58235/13508/21367/18795/22339/18709/14115/279653/16007/239857/319655/56320/100182/23790/13641/245827/54371/11789/20358/13640/19158/22042/11987/269116/353156/225631/272381/17391/16423/21754/…
GO:0048880	GO:0048880	sensory system development	182	0.311801	1.59535	0.00237431	0.0975771	0.0878627	577	tags=18%, list=8%, signal=17%	16392/15208/18742/270190/58208/20848/18996/12577/20510/13388/208936/12677/66993/54352/15205/22141/58235/59058/13508/20681/22339/16870/270893/11789/11911/13193/18212/19242/20666/13649/18128/18012
GO:0021675	GO:0021675	nerve development	36	0.526174	2.03941	0.00244982	0.0978802	0.0881356	402	tags=25%, list=5%, signal=24%	16392/270190/18164/18996/15205/78286/22249/21380/13654
GO:0051899	GO:0051899	membrane depolarization	37	-0.521034	-1.79083	0.002428	0.0978802	0.0881356	548	tags=27%, list=7%, signal=25%	16476/14609/15168/71653/110876/14167/12289/12296/72821/20266
GO:0046887	GO:0046887	positive regulation of hormone secretion	77	0.400773	1.77398	0.00245105	0.0978802	0.0881356	959	tags=30%, list=13%, signal=26%	16392/11516/230899/74551/16443/66259/18795/68039/71764/14672/20666/13649/54003/109305/18754/56455/22063/20677/16573/12288/19084/215999/67151
GO:0007260	GO:0007260	tyrosine phosphorylation of STAT protein	19	0.624784	2.07179	0.00249665	0.0985743	0.0887606	182	tags=16%, list=2%, signal=15%	16392/15208/15205
GO:0060019	GO:0060019	radial glial cell differentiation	10	0.735091	2.00917	0.00251501	0.0985743	0.0887606	326	tags=40%, list=4%, signal=38%	15208/20848/15205/14432
GO:0033144	GO:0033144	negative regulation of intracellular steroid hormone receptor signaling pathway	12	0.708551	1.99691	0.00254099	0.0986791	0.088855	1	tags=8%, list=0%, signal=8%	16392
GO:0098926	GO:0098926	postsynaptic signal transduction	22	0.609404	2.07931	0.00282203	0.101782	0.0916491	819	tags=50%, list=11%, signal=45%	29867/20848/23934/234214/18795/110834/14672/109305/14678/12569/22063
GO:0045747	GO:0045747	positive regulation of Notch signaling pathway	23	0.5934	2.06	0.00302402	0.101782	0.0916491	688	tags=35%, list=9%, signal=32%	15208/20848/13388/15205/228875/18128/69638/268902
GO:1901983	GO:1901983	regulation of protein acetylation	35	0.50633	1.94113	0.00279624	0.101782	0.0916491	1	tags=3%, list=0%, signal=3%	16392
GO:1901607	GO:1901607	alpha-amino acid biosynthetic process	28	0.52867	1.93805	0.0030432	0.101782	0.0916491	519	tags=29%, list=7%, signal=27%	27053/100678/209027/108037/17769/107272/12035/67873
GO:0032637	GO:0032637	interleukin-8 production	23	-0.619312	-1.91011	0.00304063	0.101782	0.0916491	187	tags=22%, list=3%, signal=21%	269855/16173/22418/193740/15511
GO:0032677	GO:0032677	regulation of interleukin-8 production	23	-0.619312	-1.91011	0.00304063	0.101782	0.0916491	187	tags=22%, list=3%, signal=21%	269855/16173/22418/193740/15511
GO:0086002	GO:0086002	cardiac muscle cell action potential involved in contraction	18	-0.641957	-1.85564	0.00293887	0.101782	0.0916491	241	tags=28%, list=3%, signal=27%	16480/12289/12296/72821/20266
GO:0086001	GO:0086001	cardiac muscle cell action potential	31	-0.547139	-1.79928	0.00304655	0.101782	0.0916491	516	tags=23%, list=7%, signal=21%	15168/16480/12289/13405/12296/72821/20266
GO:1901216	GO:1901216	positive regulation of neuron death	71	0.402477	1.7503	0.00270196	0.101782	0.0916491	419	tags=18%, list=6%, signal=17%	56312/14812/18742/100102/72930/18996/12123/20450/216150/21981/13653/14281/11911
GO:0051092	GO:0051092	positive regulation of NF-kappaB transcription factor activity	52	-0.480682	-1.74628	0.00283153	0.101782	0.0916491	369	tags=19%, list=5%, signal=18%	18760/240354/19106/16180/225471/18761/16173/22418/193740/15511
GO:1905515	GO:1905515	non-motile cilium assembly	52	-0.479149	-1.74071	0.00293176	0.101782	0.0916491	2149	tags=56%, list=29%, signal=40%	20460/380614/66910/71448/52023/71492/381644/277939/52906/110350/16328/18536/74025/329795/52028/81896/21821/67378/216274/68259/380718/76260/244585/67661/106633/231214/70300/544696/234915
GO:0002793	GO:0002793	positive regulation of peptide secretion	63	0.400013	1.71333	0.00272119	0.101782	0.0916491	959	tags=30%, list=13%, signal=26%	16392/11516/74551/16443/66259/18795/71764/14672/13649/109305/18754/56455/22063/20677/16573/12288/19084/215999/67151
GO:0090277	GO:0090277	positive regulation of peptide hormone secretion	63	0.400013	1.71333	0.00272119	0.101782	0.0916491	959	tags=30%, list=13%, signal=26%	16392/11516/74551/16443/66259/18795/71764/14672/13649/109305/18754/56455/22063/20677/16573/12288/19084/215999/67151
GO:0002237	GO:0002237	response to molecule of bacterial origin	80	-0.423349	-1.66546	0.00305371	0.101782	0.0916491	342	tags=15%, list=5%, signal=14%	240354/19106/22038/17260/235527/269855/70097/225471/56615/16159/16173/22418
GO:0015833	GO:0015833	peptide transport	141	0.314705	1.53081	0.00300627	0.101782	0.0916491	959	tags=23%, list=13%, signal=20%	16392/57738/11516/74551/381677/17932/16443/277978/66259/18795/19339/71764/12290/13640/14672/13649/18012/16522/109305/18754/56455/11799/545156/22063/20677/16573/12288/19084/215999/52055/228355/67151
GO:0070848	GO:0070848	response to growth factor	266	0.269411	1.44611	0.00281077	0.101782	0.0916491	847	tags=19%, list=11%, signal=18%	15208/14176/14783/18654/14456/20848/12577/12721/13388/76829/14388/15901/15245/15205/58250/94187/20289/22339/16007/56320/20419/21380/20257/13653/20358/14281/65112/17826/225631/18212/20666/13649/18128/18053/13660/68431/170749/107392/20319/19246/225743/353310/244654/18754/15936/74769/17131/22417/23988/15258/50766
GO:0043069	GO:0043069	negative regulation of programmed cell death	421	0.245476	1.36299	0.00283769	0.101782	0.0916491	858	tags=18%, list=12%, signal=17%	16392/56312/16880/57875/12608/11516/58208/12575/109270/14456/27053/18996/12795/20510/12721/13388/16443/18039/15901/15245/107503/58250/64209/15368/29816/20289/20681/22339/234734/15937/16007/11692/171580/21380/11789/77006/22042/74178/20656/19099/26897/78688/18611/18212/105675/319801/13649/279561/18128/18053/18012/15461/14297/12048/14678/20319/19246/11486/70369/18754/11799/11740/20439/12122/74769/23…
GO:2000145	GO:2000145	regulation of cell motility	403	0.242813	1.34646	0.00267315	0.101782	0.0916491	713	tags=17%, list=10%, signal=17%	14176/384009/18654/18845/109270/14456/20868/57266/20733/16002/214968/20848/12721/22253/117600/66922/16776/22240/14388/260315/80883/20970/277360/545474/244418/15368/114886/106014/18795/22339/18709/216892/16007/16911/20467/23790/54371/11789/13653/20358/77006/269951/20656/17826/353156/225631/16423/19242/232227/13649/18128/18053/19241/228564/56332/15461/53626/67254/14678/107392/20319/353310/328949/22…
GO:2000756	GO:2000756	regulation of peptidyl-lysine acetylation	32	0.528089	1.96463	0.00321688	0.106383	0.095792	1	tags=3%, list=0%, signal=3%	16392
GO:0007259	GO:0007259	receptor signaling pathway via JAK-STAT	45	0.471766	1.90923	0.00331157	0.108666	0.0978475	182	tags=9%, list=2%, signal=9%	16392/15208/20848/15205
GO:1903532	GO:1903532	positive regulation of secretion by cell	147	0.312163	1.52204	0.00342124	0.110904	0.099863	962	tags=24%, list=13%, signal=22%	16392/14812/11516/230899/74551/16443/14299/66259/18795/19339/20969/22249/68039/71764/56513/14672/20666/13649/54003/19349/12048/109305/26399/18754/11785/56455/22063/20677/22350/16573/12288/19084/215999/17319/67151/20983
GO:0051129	GO:0051129	negative regulation of cellular component organization	379	0.240801	1.33103	0.00343219	0.110904	0.099863	781	tags=16%, list=10%, signal=15%	16392/56312/14812/67749/100102/13685/214968/12721/18013/22240/260315/15901/23805/15205/225020/244418/20112/268445/360213/29816/22339/80880/15937/67629/56320/16911/23790/22248/20257/11789/20358/65112/19158/22042/107065/67087/78688/105675/319801/21754/17755/20742/19242/16852/18128/18053/19241/67254/14297/12048/70369/68350/15481/15078/11799/11740/216363/68041/14964/208158
GO:0001659	GO:0001659	temperature homeostasis	71	0.395374	1.7194	0.00348459	0.111711	0.100589	564	tags=23%, list=8%, signal=21%	14783/12608/11516/23882/20848/13592/15901/94187/22339/227120/11789/13653/11911/107515/16592/18128
GO:0021543	GO:0021543	pallium development	88	0.367223	1.67004	0.00350993	0.111711	0.100589	870	tags=23%, list=12%, signal=20%	140486/67749/22773/22151/16975/59058/18795/16870/13193/18212/12032/13649/18012/57752/67254/12569/70223/73710/19699/216850
GO:0031016	GO:0031016	pancreas development	35	0.496378	1.90297	0.00365463	0.11375	0.102426	182	tags=17%, list=2%, signal=17%	16392/22773/16002/13388/17932/15205
GO:0003208	GO:0003208	cardiac ventricle morphogenesis	26	0.531139	1.88678	0.00361024	0.11375	0.102426	921	tags=35%, list=12%, signal=30%	16392/18996/66993/20666/18128/20319/17131/20677/20191
GO:0099177	GO:0099177	regulation of trans-synaptic signaling	289	0.265945	1.43823	0.00363832	0.11375	0.102426	824	tags=21%, list=11%, signal=19%	21366/14812/270190/11516/18164/435145/54377/16728/20848/13004/20510/18013/231207/381677/229791/81840/14299/18039/80883/12297/16975/12890/21367/211134/18795/19339/227120/110834/242667/22249/56320/12290/13653/11911/226180/107065/228836/18212/16592/19242/232227/13649/18053/18196/15461/108100/12048/14678/242662/230235/18754/380785/73710/19087/19699/68966/215449/11419/219228/67826
GO:2000737	GO:2000737	negative regulation of stem cell differentiation	17	0.6044	1.96471	0.00375261	0.114149	0.102785	564	tags=35%, list=8%, signal=33%	15208/20848/15205/77889/15526/18128
GO:0060021	GO:0060021	roof of mouth development	43	-0.505381	-1.77513	0.0037871	0.114149	0.102785	2378	tags=63%, list=32%, signal=43%	68911/16974/11481/380614/66910/231070/71492/14451/20397/414758/212712/30953/17168/21808/65973/21821/216560/67661/70300/11695/71371/17260/14634/544696/320910/14238/22418
GO:0048854	GO:0048854	brain morphogenesis	27	-0.55854	-1.77194	0.00370353	0.114149	0.102785	1671	tags=52%, list=22%, signal=40%	18541/56484/23797/14088/18424/14466/52028/58234/21821/67378/19165/19211/18423/22418
GO:0021953	GO:0021953	central nervous system neuron differentiation	95	0.356147	1.62297	0.003727	0.114149	0.102785	342	tags=13%, list=5%, signal=12%	16392/15208/270190/233552/58208/18996/15205/77630/59058/21367/16911/50913
GO:0050804	GO:0050804	modulation of chemical synaptic transmission	288	0.263693	1.42215	0.00380227	0.114149	0.102785	824	tags=20%, list=11%, signal=19%	21366/14812/270190/11516/18164/435145/54377/16728/20848/13004/20510/18013/231207/381677/229791/81840/14299/18039/80883/12297/16975/12890/21367/211134/18795/19339/227120/110834/242667/22249/56320/12290/13653/11911/226180/107065/228836/18212/19242/232227/13649/18053/18196/15461/108100/12048/14678/242662/230235/18754/380785/73710/19087/19699/68966/215449/11419/219228/67826
GO:0014032	GO:0014032	neural crest cell development	36	0.512407	1.98605	0.00383637	0.114362	0.102976	406	tags=25%, list=5%, signal=24%	16392/214968/16776/15205/20681/23790/13641/21380/20358
GO:0042509	GO:0042509	regulation of tyrosine phosphorylation of STAT protein	18	0.628521	2.08051	0.0040977	0.116413	0.104824	182	tags=17%, list=2%, signal=16%	16392/15208/15205
GO:0095500	GO:0095500	acetylcholine receptor signaling pathway	13	0.684651	2.01889	0.00399159	0.116413	0.104824	819	tags=69%, list=11%, signal=62%	23934/234214/18795/110834/14672/109305/14678/12569/22063
GO:1905145	GO:1905145	cellular response to acetylcholine	13	0.684651	2.01889	0.00399159	0.116413	0.104824	819	tags=69%, list=11%, signal=62%	23934/234214/18795/110834/14672/109305/14678/12569/22063
GO:2000765	GO:2000765	regulation of cytoplasmic translation	16	0.619662	1.97867	0.00408054	0.116413	0.104824	105	tags=12%, list=1%, signal=12%	140486/231207
GO:1905144	GO:1905144	response to acetylcholine	14	0.636336	1.94418	0.00409201	0.116413	0.104824	819	tags=64%, list=11%, signal=57%	23934/234214/18795/110834/14672/109305/14678/12569/22063
GO:0046685	GO:0046685	response to arsenic-containing substance	12	0.686604	1.93506	0.00402922	0.116413	0.104824	505	tags=42%, list=7%, signal=39%	231207/18039/15368/17025/105675
GO:0050678	GO:0050678	regulation of epithelial cell proliferation	154	0.301049	1.4802	0.00396395	0.116413	0.104824	659	tags=17%, list=9%, signal=16%	16392/15208/56312/18654/58208/16002/20848/12577/16776/15901/15205/15368/22339/21380/11789/353156/18102/19242/20666/13649/18128/18053/15461/20319/353310/328949
GO:0055010	GO:0055010	ventricular cardiac muscle tissue morphogenesis	17	0.597566	1.94249	0.00437373	0.117177	0.105511	87	tags=12%, list=1%, signal=12%	16392/18996
GO:0001708	GO:0001708	cell fate specification	44	0.473801	1.90614	0.00436756	0.117177	0.105511	640	tags=30%, list=9%, signal=27%	16392/216848/18996/13388/27140/23805/16911/50913/21380/11789/20672/18128/20319
GO:0048663	GO:0048663	neuron fate commitment	30	0.513656	1.88592	0.00429954	0.117177	0.105511	368	tags=27%, list=5%, signal=25%	16392/58208/18996/13388/27140/16911/50913/21380
GO:0051781	GO:0051781	positive regulation of cell division	33	0.501868	1.88255	0.00418787	0.117177	0.105511	742	tags=30%, list=10%, signal=27%	14176/18654/16002/22339/11789/77889/19242/12531/18754/11799
GO:0008652	GO:0008652	amino acid biosynthetic process	31	0.492359	1.82273	0.00422657	0.117177	0.105511	519	tags=26%, list=7%, signal=24%	27053/100678/209027/108037/17769/107272/12035/67873
GO:0086065	GO:0086065	cell communication involved in cardiac conduction	17	-0.61997	-1.76802	0.00427109	0.117177	0.105511	516	tags=29%, list=7%, signal=27%	15168/16480/12289/12296/20266
GO:0106106	GO:0106106	cold-induced thermogenesis	63	0.387349	1.65908	0.00436808	0.117177	0.105511	564	tags=22%, list=8%, signal=21%	14783/12608/11516/23882/13592/15901/94187/22339/227120/11789/11911/107515/16592/18128
GO:0120161	GO:0120161	regulation of cold-induced thermogenesis	63	0.387349	1.65908	0.00436808	0.117177	0.105511	564	tags=22%, list=8%, signal=21%	14783/12608/11516/23882/13592/15901/94187/22339/227120/11789/11911/107515/16592/18128
GO:0061061	GO:0061061	muscle structure development	298	0.251423	1.36769	0.00422309	0.117177	0.105511	1021	tags=24%, list=14%, signal=21%	16392/56312/53318/270190/237611/57266/16002/18996/22761/13388/16776/17932/66993/15205/20289/234214/18795/20681/22339/68794/16656/20969/227325/13007/20467/18810/74490/21380/13653/13654/14281/30794/20656/22634/11910/78688/16852/20666/18128/19241/13660/17927/227721/225743/18081/11465/15078/13052/16795/17131/22417/20677/276770/23988/16653/216850/12301/72057/16011/19084/54132/20191/56376/20203/22223/5…
GO:0060384	GO:0060384	innervation	15	0.636818	1.98669	0.00454388	0.12097	0.108927	318	tags=27%, list=4%, signal=26%	16392/18164/18996/22249
GO:0045820	GO:0045820	negative regulation of glycolytic process	13	0.674805	1.98986	0.00479492	0.122532	0.110333	513	tags=31%, list=7%, signal=29%	56312/20848/15937/319801
GO:0010574	GO:0010574	regulation of vascular endothelial growth factor production	10	0.709671	1.93969	0.00490545	0.122532	0.110333	429	tags=30%, list=6%, signal=28%	16392/11911/29811
GO:0045071	GO:0045071	negative regulation of viral genome replication	18	-0.627245	-1.81311	0.00493612	0.122532	0.110333	1587	tags=56%, list=21%, signal=44%	80750/218850/98999/235047/80876/100040462/19106/22038/78781/319278
GO:2001239	GO:2001239	regulation of extrinsic apoptotic signaling pathway in absence of ligand	19	-0.609261	-1.7931	0.00492134	0.122532	0.110333	1131	tags=32%, list=15%, signal=27%	21808/216439/170755/14051/193740/15511
GO:1901658	GO:1901658	glycosyl compound catabolic process	16	-0.636981	-1.79287	0.00475179	0.122532	0.110333	1718	tags=62%, list=23%, signal=48%	71891/232449/17766/269378/14466/17939/22271/76654/224794/99586
GO:0031638	GO:0031638	zymogen activation	14	-0.653654	-1.77465	0.00475333	0.122532	0.110333	1001	tags=43%, list=13%, signal=37%	192656/66824/65973/67013/100040462/20194
GO:0071456	GO:0071456	cellular response to hypoxia	60	0.406776	1.7266	0.0049499	0.122532	0.110333	960	tags=28%, list=13%, signal=25%	67749/16526/22359/13685/12795/231207/22339/66568/13653/78688/319801/18128/18754/74769/69219/19155/56717
GO:0051047	GO:0051047	positive regulation of secretion	153	0.308669	1.51424	0.00472129	0.122532	0.110333	962	tags=24%, list=13%, signal=22%	16392/14812/11516/230899/74551/16443/14299/66259/18795/19339/20969/22249/68039/71764/56513/14672/20666/13649/54003/19349/12048/109305/14678/26399/18754/11785/56455/22063/20677/22350/16573/12288/19084/215999/17319/67151/20983
GO:0030334	GO:0030334	regulation of cell migration	383	0.243582	1.35085	0.00481326	0.122532	0.110333	713	tags=17%, list=10%, signal=17%	14176/384009/18654/18845/109270/14456/20868/57266/16002/214968/20848/12721/22253/117600/66922/16776/22240/14388/260315/80883/20970/277360/545474/15368/114886/106014/18795/22339/18709/216892/16007/16911/20467/23790/54371/11789/13653/20358/77006/269951/20656/17826/353156/225631/16423/19242/232227/13649/18128/18053/19241/228564/56332/15461/53626/67254/14678/107392/20319/353310/328949/11486/18081/259…
GO:0040012	GO:0040012	regulation of locomotion	421	0.240696	1.33645	0.00469408	0.122532	0.110333	971	tags=22%, list=13%, signal=20%	14176/384009/18654/18845/109270/14456/20868/57266/20733/16002/214968/20848/12721/22253/117600/66922/16776/22240/14388/260315/80883/20970/277360/545474/244418/15368/114886/13508/106014/18795/22339/18709/216892/16007/56320/16911/20467/23790/54371/11789/13653/20358/77006/269951/20656/17826/353156/225631/16423/19242/232227/13649/18128/18053/19241/228564/56332/15461/53626/67254/14678/107392/20319/3533…
GO:0099537	GO:0099537	trans-synaptic signaling	377	0.237794	1.31461	0.00485108	0.122532	0.110333	824	tags=19%, list=11%, signal=18%	21366/14812/20370/270190/11516/237611/19293/18164/435145/54377/16728/20848/13004/23964/20510/14395/18013/231207/381677/229791/81840/14406/14299/18039/80883/12297/16975/12890/21367/211134/18795/19339/227120/110834/242667/22249/56320/242425/12290/13653/11911/226180/30794/107065/228836/23859/18212/16592/19242/232227/13649/18053/18196/15461/108100/12048/64051/14678/13446/242662/230235/18754/353342/38…
GO:0060548	GO:0060548	negative regulation of cell death	483	0.227806	1.30014	0.0048034	0.122532	0.110333	874	tags=18%, list=12%, signal=17%	16392/56312/16880/57875/12608/11516/58208/12575/109270/14456/27053/20848/18996/12795/20510/12721/13388/16443/18039/15901/209027/15245/107503/58250/64209/15368/29816/20289/20681/22339/234734/15937/16007/11692/171580/21380/11789/77006/11911/22042/74178/20656/19099/26897/78688/18611/18212/105675/319801/15526/20666/13649/279561/18128/18053/18012/15461/14297/12048/14678/20319/19246/11486/70369/18754/1…
GO:0097696	GO:0097696	receptor signaling pathway via STAT	47	0.461052	1.89126	0.00503478	0.123908	0.111573	182	tags=9%, list=2%, signal=8%	16392/15208/20848/15205
GO:0021879	GO:0021879	forebrain neuron differentiation	22	0.586852	2.00237	0.00544159	0.124821	0.112395	703	tags=27%, list=9%, signal=25%	15208/58208/15205/13193/18072/67263
GO:0015802	GO:0015802	basic amino acid transport	10	0.705776	1.92904	0.00545522	0.124821	0.112395	831	tags=50%, list=11%, signal=44%	11989/17254/11987/214663/20539
GO:0032635	GO:0032635	interleukin-6 production	48	0.44876	1.84603	0.00525996	0.124821	0.112395	344	tags=19%, list=5%, signal=18%	16392/12608/11516/14456/20848/239114/18987/16007/68039
GO:0045766	GO:0045766	positive regulation of angiogenesis	53	0.435456	1.8113	0.00523963	0.124821	0.112395	304	tags=17%, list=4%, signal=16%	16392/18654/16002/20848/13388/14388/15368/22339/15277
GO:1904018	GO:1904018	positive regulation of vasculature development	53	0.435456	1.8113	0.00523963	0.124821	0.112395	304	tags=17%, list=4%, signal=16%	16392/18654/16002/20848/13388/14388/15368/22339/15277
GO:1901099	GO:1901099	negative regulation of signal transduction in absence of ligand	13	-0.682466	-1.81069	0.0054532	0.124821	0.112395	1058	tags=38%, list=14%, signal=33%	216439/170755/14051/193740/15511
GO:2001240	GO:2001240	negative regulation of extrinsic apoptotic signaling pathway in absence of ligand	13	-0.682466	-1.81069	0.0054532	0.124821	0.112395	1058	tags=38%, list=14%, signal=33%	216439/170755/14051/193740/15511
GO:0032755	GO:0032755	positive regulation of interleukin-6 production	31	0.486685	1.80173	0.00513877	0.124821	0.112395	305	tags=19%, list=4%, signal=19%	16392/11516/20848/239114/18987/16007
GO:0070059	GO:0070059	intrinsic apoptotic signaling pathway in response to endoplasmic reticulum stress	31	0.485994	1.79917	0.00526039	0.124821	0.112395	641	tags=19%, list=9%, signal=18%	69065/12608/64209/11911/12048/19246
GO:0050768	GO:0050768	negative regulation of neurogenesis	83	0.371105	1.6762	0.00534372	0.124821	0.112395	564	tags=19%, list=8%, signal=18%	15208/18742/11516/214968/12677/13389/15901/15205/107503/360213/16870/20358/269951/19242/20666/18128
GO:0042063	GO:0042063	gliogenesis	168	0.296621	1.48883	0.00538558	0.124821	0.112395	564	tags=17%, list=8%, signal=16%	15208/14176/18742/11516/20848/66922/13388/12805/16975/13389/15205/107503/77630/21367/20681/227325/14432/18810/50913/13654/269951/13193/18212/17391/19242/20666/13649/18128
GO:0001525	GO:0001525	angiogenesis	183	0.284455	1.45301	0.00528556	0.124821	0.112395	588	tags=15%, list=8%, signal=14%	16392/230126/57875/270190/18654/16002/20848/13388/14388/15901/15245/15368/106014/22339/18709/15277/16007/242705/21380/20358/83921/353156/20672/19242/18710/18128/18053/56332
GO:0050767	GO:0050767	regulation of neurogenesis	230	0.272728	1.42781	0.00516061	0.124821	0.112395	689	tags=19%, list=9%, signal=18%	15208/18742/11516/18845/16728/214968/18996/13388/12677/18039/16975/66993/71751/13389/15901/15205/107503/360213/13508/20681/22339/16870/56320/50913/13654/20358/13640/55927/269951/13193/18212/17755/19242/20666/13649/18128/16885/108100/14297/18223/22041/268902/67838
GO:0060284	GO:0060284	regulation of cell development	392	0.227044	1.26648	0.0055491	0.126287	0.113714	689	tags=16%, list=9%, signal=15%	15208/230126/18742/12608/11516/18845/14456/16728/214968/20848/18996/65963/22761/13388/12677/18039/16975/66993/71751/13389/15901/15205/107503/239114/72147/360213/72828/13508/18795/20681/22339/16870/56320/50913/11789/13654/20358/14281/13640/55927/269951/13193/67087/18102/18212/17755/19242/15526/20666/13649/18128/16885/17927/56436/108100/14297/18223/22041/11486/18081/268902/67838
GO:0048646	GO:0048646	anatomical structure formation involved in morphogenesis	448	0.231687	1.30229	0.00565742	0.128063	0.115314	708	tags=15%, list=10%, signal=15%	16392/15208/230126/57875/270190/18654/18845/22773/20733/16002/20848/20510/22761/13388/14388/12805/16975/66993/13389/15901/15245/15205/17769/15368/58235/20289/106014/20681/22339/18709/16870/68794/15277/16007/13007/16911/242705/18810/319520/16477/21380/13654/20358/53414/269116/83921/353156/13193/20672/20742/19242/20666/18710/18128/18053/22323/13660/56332/17927/67254/270685/13823/20319/73750/11486/1…
GO:0002328	GO:0002328	pro-B cell differentiation	11	0.695572	1.95645	0.00572456	0.128211	0.115447	828	tags=45%, list=11%, signal=40%	15208/15205/18128/68219/20677
GO:0007422	GO:0007422	peripheral nervous system development	34	0.501153	1.91916	0.0057583	0.128211	0.115447	599	tags=26%, list=8%, signal=24%	16392/18996/20681/18810/13654/269116/225631/18212/18072
GO:0001961	GO:0001961	positive regulation of cytokine-mediated signaling pathway	20	-0.603426	-1.80276	0.00581537	0.128211	0.115447	450	tags=25%, list=6%, signal=24%	384309/225471/22418/193740/15511
GO:0060760	GO:0060760	positive regulation of response to cytokine stimulus	20	-0.603426	-1.80276	0.00581537	0.128211	0.115447	450	tags=25%, list=6%, signal=24%	384309/225471/22418/193740/15511
GO:0046883	GO:0046883	regulation of hormone secretion	133	0.304538	1.48141	0.00573739	0.128211	0.115447	959	tags=23%, list=13%, signal=21%	16392/11516/230899/74551/17932/16443/66259/18795/68039/71764/12290/13640/14672/20666/13649/54003/16522/109305/18754/56455/11799/545156/22063/20677/16573/12288/19084/215999/52055/228355/67151
GO:0002704	GO:0002704	negative regulation of leukocyte mediated immunity	10	0.703618	1.92314	0.0058556	0.128429	0.115643	955	tags=50%, list=13%, signal=44%	16002/15368/11692/17131/110279
GO:0030856	GO:0030856	regulation of epithelial cell differentiation	54	0.423942	1.76574	0.0058979	0.12869	0.115878	395	tags=17%, list=5%, signal=16%	15208/12608/12577/13388/15901/15205/18795/22339/11789
GO:0002262	GO:0002262	myeloid cell homeostasis	92	-0.385052	-1.54656	0.00593754	0.12889	0.116058	878	tags=15%, list=12%, signal=14%	319653/320404/12633/16590/74443/13423/12505/16909/241525/15122/16173/193740/15511/110257
GO:0010656	GO:0010656	negative regulation of muscle cell apoptotic process	33	0.488473	1.8323	0.00598708	0.129303	0.11643	640	tags=21%, list=9%, signal=19%	56312/16880/11516/15368/26897/78688/20319
GO:0010573	GO:0010573	vascular endothelial growth factor production	11	0.691721	1.94562	0.00622233	0.131871	0.118743	429	tags=27%, list=6%, signal=26%	16392/11911/29811
GO:0055006	GO:0055006	cardiac cell development	39	0.463029	1.80827	0.00617321	0.131871	0.118743	960	tags=23%, list=13%, signal=20%	16392/234214/22339/18810/18128/13052/23988/56376/56717
GO:0002718	GO:0002718	regulation of cytokine production involved in immune response	27	-0.544565	-1.72761	0.00623062	0.131871	0.118743	1433	tags=44%, list=19%, signal=36%	11600/18762/15275/21808/192656/66824/16590/240354/20361/225471/16173/22418
GO:0036294	GO:0036294	cellular response to decreased oxygen levels	62	0.400408	1.71852	0.00620265	0.131871	0.118743	960	tags=27%, list=13%, signal=24%	67749/16526/22359/13685/12795/231207/22339/66568/13653/78688/319801/18128/18754/74769/69219/19155/56717
GO:0002833	GO:0002833	positive regulation of response to biotic stimulus	93	-0.396622	-1.5948	0.00631552	0.132345	0.119169	457	tags=15%, list=6%, signal=14%	67486/384309/100040462/22038/78781/30936/70097/225471/15064/67664/16159/22418/193740/15511
GO:0044255	GO:0044255	cellular lipid metabolic process	391	-0.286537	-1.37419	0.00629908	0.132345	0.119169	1948	tags=34%, list=26%, signal=26%	228094/110417/18984/52023/68865/231070/100340/228859/14792/50790/12916/69048/257633/20250/16835/70757/26877/76524/13139/16956/99712/17777/71519/107476/17850/20397/12908/14385/13666/56336/74159/207958/75387/66885/75778/171210/64436/225326/52430/19299/384783/18023/81535/218121/74244/74182/70750/320634/320951/75669/56357/16889/77582/66659/11364/78070/17772/329777/15107/64898/14667/26874/19662/14466/…
GO:0060236	GO:0060236	regulation of mitotic spindle organization	22	-0.588734	-1.8062	0.00638495	0.13314	0.119886	14	tags=32%, list=0%, signal=32%	68942/20460/18763/240121/73420/193740/15511
GO:0048665	GO:0048665	neuron fate specification	20	0.552678	1.8481	0.00656537	0.134909	0.121478	368	tags=30%, list=5%, signal=29%	16392/18996/13388/27140/16911/21380
GO:0001937	GO:0001937	negative regulation of endothelial cell proliferation	13	-0.674004	-1.78824	0.00650588	0.134909	0.121478	529	tags=38%, list=7%, signal=36%	14609/17260/11816/12390/16159
GO:0048853	GO:0048853	forebrain morphogenesis	10	-0.711482	-1.77042	0.00653676	0.134909	0.121478	1185	tags=50%, list=16%, signal=42%	18424/21821/19211/18423/22418
GO:0021872	GO:0021872	forebrain generation of neurons	28	0.49508	1.81491	0.00701427	0.141388	0.127312	703	tags=21%, list=9%, signal=19%	15208/58208/15205/13193/18072/67263
GO:0061081	GO:0061081	positive regulation of myeloid leukocyte cytokine production involved in immune response	12	-0.668272	-1.75567	0.00700375	0.141388	0.127312	1001	tags=50%, list=13%, signal=43%	192656/66824/16590/20361/225471/22418
GO:0007268	GO:0007268	chemical synaptic transmission	372	0.236002	1.30198	0.00700825	0.141388	0.127312	824	tags=19%, list=11%, signal=18%	21366/14812/20370/270190/11516/237611/19293/18164/435145/54377/16728/20848/13004/20510/14395/18013/231207/381677/229791/81840/14406/14299/18039/80883/12297/16975/12890/21367/211134/18795/19339/227120/110834/242667/22249/56320/242425/12290/13653/11911/226180/30794/107065/228836/23859/18212/19242/232227/13649/18053/18196/15461/108100/12048/64051/14678/13446/242662/230235/18754/353342/380785/73710/1…
GO:0098916	GO:0098916	anterograde trans-synaptic signaling	372	0.236002	1.30198	0.00700825	0.141388	0.127312	824	tags=19%, list=11%, signal=18%	21366/14812/20370/270190/11516/237611/19293/18164/435145/54377/16728/20848/13004/20510/14395/18013/231207/381677/229791/81840/14406/14299/18039/80883/12297/16975/12890/21367/211134/18795/19339/227120/110834/242667/22249/56320/242425/12290/13653/11911/226180/30794/107065/228836/23859/18212/19242/232227/13649/18053/18196/15461/108100/12048/64051/14678/13446/242662/230235/18754/353342/380785/73710/1…
GO:0048708	GO:0048708	astrocyte differentiation	42	0.452675	1.8048	0.00706346	0.141704	0.127597	564	tags=26%, list=8%, signal=24%	15208/20848/13388/13389/15205/107503/21367/20681/14432/13649/18128
GO:0042531	GO:0042531	positive regulation of tyrosine phosphorylation of STAT protein	13	0.659729	1.9454	0.00721531	0.144068	0.129725	182	tags=23%, list=2%, signal=23%	16392/15208/15205
GO:0097035	GO:0097035	regulation of membrane lipid distribution	24	-0.564029	-1.76061	0.00734569	0.145983	0.131449	2293	tags=71%, list=31%, signal=49%	68385/219149/54667/319581/68865/50770/76295/108138/50771/320091/328370/17250/497097/22038/11982/235527/18669
GO:0014033	GO:0014033	neural crest cell differentiation	41	0.466294	1.84737	0.00744526	0.14727	0.132608	406	tags=22%, list=5%, signal=21%	16392/214968/16776/15205/20681/23790/13641/21380/20358
GO:1901342	GO:1901342	regulation of vasculature development	100	0.34099	1.55583	0.00749347	0.147534	0.132846	917	tags=24%, list=12%, signal=21%	16392/18654/16002/20848/13388/14388/15901/15245/15368/106014/22339/15277/242705/20358/19242/18053/20319/18081/74769/216527/22417/15258/69219/20226
GO:0033146	GO:0033146	regulation of intracellular estrogen receptor signaling pathway	15	0.615206	1.91927	0.00761896	0.148143	0.133395	507	tags=20%, list=7%, signal=19%	16392/77006/77889
GO:1903715	GO:1903715	regulation of aerobic respiration	21	0.550721	1.85945	0.0076644	0.148143	0.133395	717	tags=24%, list=10%, signal=22%	56312/102060/108037/105675/70556
GO:0043525	GO:0043525	positive regulation of neuron apoptotic process	47	0.446783	1.83273	0.00764114	0.148143	0.133395	419	tags=19%, list=6%, signal=18%	56312/18742/100102/72930/18996/12123/216150/13653/11911
GO:1903053	GO:1903053	regulation of extracellular matrix organization	28	-0.53522	-1.71096	0.00758763	0.148143	0.133395	1131	tags=36%, list=15%, signal=30%	21808/58859/12633/20682/70779/15117/12006/69538/14726/16773
GO:0045980	GO:0045980	negative regulation of nucleotide metabolic process	19	0.584762	1.93908	0.00788101	0.150141	0.135193	513	tags=26%, list=7%, signal=25%	56312/20848/15444/15937/319801
GO:1900543	GO:1900543	negative regulation of purine nucleotide metabolic process	19	0.584762	1.93908	0.00788101	0.150141	0.135193	513	tags=26%, list=7%, signal=25%	56312/20848/15444/15937/319801
GO:0055013	GO:0055013	cardiac muscle cell development	34	0.488561	1.87094	0.00794508	0.150141	0.135193	337	tags=12%, list=5%, signal=11%	16392/234214/22339/18810
GO:1901532	GO:1901532	regulation of hematopoietic progenitor cell differentiation	24	0.521977	1.80162	0.00786126	0.150141	0.135193	649	tags=25%, list=9%, signal=23%	15208/15205/22339/15526/18128/68219
GO:0070841	GO:0070841	inclusion body assembly	16	-0.617965	-1.73935	0.00792984	0.150141	0.135193	1390	tags=50%, list=19%, signal=41%	56812/50720/224997/15512/20660/11816/193740/15511
GO:0097193	GO:0097193	intrinsic apoptotic signaling pathway	158	0.300462	1.49435	0.00811646	0.152698	0.137496	1120	tags=23%, list=15%, signal=20%	69065/56312/12608/12575/18996/64209/15368/56772/15937/242705/21981/11911/68048/20656/19099/78688/105675/15461/241494/12048/19246/70369/15254/20438/12122/74769/15258/15502/17319/22070/381038/12581/19823/13555/51800/66461
GO:0016242	GO:0016242	negative regulation of macroautophagy	22	0.574974	1.96184	0.00815933	0.152825	0.13761	513	tags=27%, list=7%, signal=25%	56312/225020/15368/104009/211134/319801
GO:1901889	GO:1901889	negative regulation of cell junction assembly	12	-0.664229	-1.74505	0.00827713	0.154279	0.13892	666	tags=42%, list=9%, signal=38%	74762/19211/13841/19249/22418
GO:0046434	GO:0046434	organophosphate catabolic process	57	-0.444008	-1.6374	0.00830985	0.154279	0.13892	813	tags=25%, list=11%, signal=22%	237868/242864/67725/12799/114663/19211/22271/76654/18577/241274/18606/23959/99586/18573
GO:0071453	GO:0071453	cellular response to oxygen levels	71	0.375766	1.63413	0.00835556	0.15445	0.139074	960	tags=27%, list=13%, signal=24%	67749/16526/22359/13685/12795/231207/22339/66568/13653/78688/319801/18128/17927/18754/66290/74769/69219/19155/56717
GO:0051960	GO:0051960	regulation of nervous system development	276	0.254701	1.3697	0.00848943	0.155566	0.140078	689	tags=18%, list=9%, signal=17%	15208/18742/270190/11516/18845/16728/214968/18996/13388/12677/18039/16975/66993/71751/13389/15901/15205/107503/360213/13508/20681/22339/16870/56320/50913/20450/13654/20358/13640/55927/269951/107065/13193/272381/18212/17755/19242/20666/13649/18128/18053/16885/108100/14297/18223/22041/16981/268902/67838
GO:0051046	GO:0051046	regulation of secretion	298	0.240824	1.31003	0.00848789	0.155566	0.140078	1033	tags=23%, list=14%, signal=21%	16392/14812/11516/230899/74551/17932/16443/14299/80976/12890/15368/66259/29816/18795/19339/110834/20969/22249/171580/68039/71764/12290/13640/269951/18212/56513/14672/20666/13649/279561/18128/54003/11981/19349/12048/64051/16522/109305/14678/26399/11486/13446/242662/18754/11785/56455/11799/56013/545156/215449/11419/22063/20677/22350/16573/12288/19084/215999/52055/228355/17319/13121/110279/67151/209…
GO:0021522	GO:0021522	spinal cord motor neuron differentiation	17	0.562783	1.82942	0.00899871	0.158994	0.143166	342	tags=24%, list=5%, signal=22%	16392/233552/16911/50913
GO:0030520	GO:0030520	intracellular estrogen receptor signaling pathway	20	0.542367	1.81362	0.00880989	0.158994	0.143166	507	tags=15%, list=7%, signal=14%	16392/77006/77889
GO:0090224	GO:0090224	regulation of spindle organization	23	-0.581288	-1.79284	0.00886407	0.158994	0.143166	14	tags=30%, list=0%, signal=30%	68942/20460/18763/240121/73420/193740/15511
GO:1902305	GO:1902305	regulation of sodium ion transmembrane transport	34	-0.521895	-1.75291	0.00901457	0.158994	0.143166	276	tags=21%, list=4%, signal=20%	11932/14167/57816/13405/98660/72821/20266
GO:0045332	GO:0045332	phospholipid translocation	20	-0.58216	-1.73922	0.00891683	0.158994	0.143166	2195	tags=70%, list=29%, signal=49%	219149/54667/319581/50770/76295/108138/50771/320091/17250/497097/22038/11982/235527/18669
GO:1902075	GO:1902075	cellular response to salt	71	0.374817	1.63	0.00895774	0.158994	0.143166	985	tags=35%, list=13%, signal=31%	18164/20510/18013/23934/15444/80976/234214/18795/110834/18810/16477/13653/14281/23859/105675/14672/56506/109305/14678/12569/22063/17748/57028/20983/171180
GO:0031333	GO:0031333	negative regulation of protein-containing complex assembly	74	0.368073	1.61377	0.00895277	0.158994	0.143166	570	tags=15%, list=8%, signal=14%	16392/13685/29816/80880/16911/20257/65112/67087/78688/20742/19241
GO:2000146	GO:2000146	negative regulation of cell motility	122	0.317345	1.50282	0.00884553	0.158994	0.143166	1090	tags=30%, list=15%, signal=26%	20733/214968/20848/117600/22240/260315/114886/106014/18795/18709/20467/23790/269951/353156/19242/18128/18053/228564/67254/107392/20319/328949/11486/259302/22417/23988/12317/16011/14026/23938/17319/110279/12631/110532/107831/26356/29876
GO:0050808	GO:0050808	synapse organization	290	0.252215	1.36061	0.00875649	0.158994	0.143166	842	tags=21%, list=11%, signal=19%	55983/14812/20370/270190/29867/228942/18164/16728/13004/20510/14395/18013/16776/14406/16443/18039/80883/12297/16975/72333/58235/29816/21367/211134/234214/19339/242667/22249/56320/14432/13641/20450/13640/12830/269116/107065/272381/56747/18212/70729/19242/12032/232533/108100/18223/234267/242662/16981/230235/15481/11785/12569/56013/226016/545156/19699/215449/219228/22350/23988/22154
GO:1903579	GO:1903579	negative regulation of ATP metabolic process	17	0.562568	1.82872	0.00910274	0.159223	0.143371	513	tags=24%, list=7%, signal=22%	56312/20848/15937/319801
GO:0090287	GO:0090287	regulation of cellular response to growth factor stimulus	121	0.311455	1.4707	0.00909204	0.159223	0.143371	847	tags=25%, list=11%, signal=22%	15208/14783/12577/13388/76829/15245/15205/58250/94187/22339/16007/20358/65112/17826/225631/20666/18128/18053/68431/107392/20319/19246/225743/353310/74769/17131/22417/23988/15258/50766
GO:0045931	GO:0045931	positive regulation of mitotic cell cycle	72	0.377041	1.64721	0.00918295	0.159965	0.144039	742	tags=15%, list=10%, signal=14%	230126/27053/13685/66993/15205/12445/18795/20135/13649/12531/11799
GO:0007218	GO:0007218	neuropeptide signaling pathway	13	0.648304	1.91171	0.00923355	0.160187	0.144239	370	tags=38%, list=5%, signal=37%	11516/230899/20606/68039/12909
GO:2000649	GO:2000649	regulation of sodium ion transmembrane transporter activity	30	-0.517246	-1.68105	0.00937223	0.161929	0.145808	244	tags=20%, list=3%, signal=19%	14167/57816/13405/98660/72821/20266
GO:1901224	GO:1901224	positive regulation of NIK/NF-kappaB signaling	24	-0.549521	-1.71532	0.00941333	0.161978	0.145852	358	tags=21%, list=5%, signal=20%	110784/19106/70097/171211/16173
GO:0021846	GO:0021846	cell proliferation in forebrain	15	0.604978	1.88736	0.00973811	0.166788	0.150183	617	tags=33%, list=8%, signal=31%	140486/12140/100182/57752/18223
GO:0048514	GO:0048514	blood vessel morphogenesis	228	0.256206	1.35081	0.00977167	0.166788	0.150183	588	tags=14%, list=8%, signal=13%	16392/230126/57875/270190/18654/16002/20848/20510/13388/14388/15901/15245/15205/15368/106014/22339/18709/15277/16007/242705/16477/21380/20358/83921/353156/18212/20672/19242/18710/18128/18053/56332
GO:0001892	GO:0001892	embryonic placenta development	38	0.455046	1.75975	0.00985513	0.167537	0.150858	358	tags=21%, list=5%, signal=20%	12608/20733/16002/12577/14388/15205/16007/16477
GO:0098962	GO:0098962	regulation of postsynaptic neurotransmitter receptor activity	13	0.644807	1.9014	0.00993994	0.167633	0.150944	1322	tags=62%, list=18%, signal=51%	18164/54377/242667/228836/380785/12794/18190/26558
GO:0031056	GO:0031056	regulation of histone modification	77	0.36235	1.6039	0.00990127	0.167633	0.150944	266	tags=6%, list=4%, signal=6%	16392/81703/16002/17769/22339
GO:0007169	GO:0007169	transmembrane receptor protein tyrosine kinase signaling pathway	264	0.253609	1.36398	0.0100451	0.168733	0.151935	643	tags=16%, list=9%, signal=15%	14176/13842/14783/270190/18654/230899/13685/16002/20848/13388/76829/14388/15245/104215/12445/72828/29816/18795/22339/18709/110834/13641/20419/22682/11789/20358/13640/12830/23921/18212/68818/18710/13649/18128/18053/15461/56436/70294/19349/14678/19246/192192
GO:0035270	GO:0035270	endocrine system development	44	0.443399	1.78383	0.0101879	0.169945	0.153026	602	tags=20%, list=8%, signal=19%	16392/12577/13388/17932/15205/21380/225631/18012/53626
GO:0002709	GO:0002709	regulation of T cell mediated immunity	17	-0.591201	-1.68598	0.0101975	0.169945	0.153026	342	tags=41%, list=5%, signal=39%	268564/18762/77777/240354/15064/16159/16173
GO:0003229	GO:0003229	ventricular cardiac muscle tissue development	18	0.592488	1.96123	0.0103342	0.170497	0.153523	87	tags=11%, list=1%, signal=11%	16392/18996
GO:0002320	GO:0002320	lymphoid progenitor cell differentiation	16	0.578298	1.84659	0.0103678	0.170497	0.153523	828	tags=31%, list=11%, signal=28%	15208/15205/18128/68219/20677
GO:0034656	GO:0034656	nucleobase-containing small molecule catabolic process	14	-0.621057	-1.68615	0.0103742	0.170497	0.153523	1718	tags=57%, list=23%, signal=44%	71891/232449/17766/269378/22271/76654/224794/99586
GO:0051961	GO:0051961	negative regulation of nervous system development	86	0.348069	1.57261	0.0103918	0.170497	0.153523	564	tags=19%, list=8%, signal=17%	15208/18742/11516/214968/12677/13389/15901/15205/107503/360213/16870/20358/269951/19242/20666/18128
GO:0006473	GO:0006473	protein acetylation	112	0.311271	1.45024	0.0105232	0.171988	0.154866	6	tags=2%, list=0%, signal=2%	16392/56312
GO:1990845	GO:1990845	adaptive thermogenesis	67	0.383369	1.65141	0.0106362	0.172501	0.155328	564	tags=22%, list=8%, signal=21%	14783/12608/11516/23882/13592/15901/94187/22339/227120/12709/11789/11911/107515/16592/18128
GO:0043549	GO:0043549	regulation of kinase activity	311	0.233966	1.2928	0.0106199	0.172501	0.155328	960	tags=20%, list=13%, signal=18%	13842/230784/230126/11516/12575/23882/14456/22359/230899/12577/20510/12427/14388/16975/71751/12445/72828/66259/22032/12447/22339/18709/217410/110834/16007/16911/23790/18810/22248/21987/11789/13653/19099/19720/18212/319801/21754/18710/13649/15461/68045/20319/19246/12531/26399/12569/56013/74769/19087/19699/18767/67468/20187/15502/16653/23938/19084/64143/17319/22223/56717
GO:1903306	GO:1903306	negative regulation of regulated secretory pathway	10	0.682581	1.86564	0.0107631	0.172972	0.155751	1030	tags=70%, list=14%, signal=60%	15368/18128/14678/215449/110279/20983/109905
GO:2000736	GO:2000736	regulation of stem cell differentiation	44	0.44252	1.78029	0.0108286	0.172972	0.155751	649	tags=20%, list=9%, signal=19%	15208/216848/20848/15205/77889/19242/15526/18128/68219
GO:0034204	GO:0034204	lipid translocation	22	-0.570068	-1.74893	0.0107506	0.172972	0.155751	1344	tags=68%, list=18%, signal=56%	219149/54667/319581/50770/76295/108138/50771/320091/328370/17250/497097/22038/11982/235527/18669
GO:0072331	GO:0072331	signal transduction by p53 class mediator	75	0.349093	1.5444	0.0107892	0.172972	0.155751	1232	tags=28%, list=17%, signal=24%	56312/230784/12575/18996/242705/21981/59092/68048/12181/241494/15254/20677/15258/26572/17319/99890/13555/51800/54673/66143/18148
GO:0060563	GO:0060563	neuroepithelial cell differentiation	22	0.562544	1.91943	0.0110527	0.17433	0.156975	842	tags=45%, list=11%, signal=40%	12608/13388/15205/17755/20666/18128/53626/22417/20677/22154
GO:0003148	GO:0003148	outflow tract septum morphogenesis	10	0.6802	1.85913	0.0113667	0.17433	0.156975	368	tags=20%, list=5%, signal=19%	16392/21380
GO:0030252	GO:0030252	growth hormone secretion	12	0.635642	1.79143	0.0113003	0.17433	0.156975	940	tags=42%, list=13%, signal=36%	11516/16443/545156/12288/228355
GO:0045746	GO:0045746	negative regulation of Notch signaling pathway	17	0.551075	1.79136	0.0111864	0.17433	0.156975	166	tags=18%, list=2%, signal=17%	69065/233552/13389
GO:0072078	GO:0072078	nephron tubule morphogenesis	28	0.470925	1.72636	0.0111666	0.17433	0.156975	487	tags=29%, list=7%, signal=27%	15208/18654/16776/15205/20681/22339/67087/107515
GO:0002711	GO:0002711	positive regulation of T cell mediated immunity	15	-0.624713	-1.71698	0.0109603	0.17433	0.156975	342	tags=47%, list=5%, signal=45%	268564/18762/77777/240354/15064/16159/16173
GO:0070252	GO:0070252	actin-mediated cell contraction	38	-0.4835	-1.67124	0.0113212	0.17433	0.156975	392	tags=24%, list=5%, signal=23%	319710/71653/16480/12289/14726/98660/12296/72821/20266
GO:0009408	GO:0009408	response to heat	37	-0.481249	-1.65409	0.0111887	0.17433	0.156975	27	tags=14%, list=0%, signal=14%	17762/29810/72821/193740/15511
GO:1901292	GO:1901292	nucleoside phosphate catabolic process	33	-0.488951	-1.63494	0.0113533	0.17433	0.156975	982	tags=30%, list=13%, signal=26%	12497/237868/67725/12799/22271/76654/18577/23959/99586/18573
GO:0030218	GO:0030218	erythrocyte differentiation	70	-0.410463	-1.56998	0.0111369	0.17433	0.156975	878	tags=16%, list=12%, signal=14%	319653/12633/16590/74443/13423/16909/241525/15122/193740/15511/110257
GO:0010001	GO:0010001	glial cell differentiation	119	0.308936	1.45319	0.0113631	0.17433	0.156975	564	tags=18%, list=8%, signal=17%	15208/14176/20848/13388/12805/13389/15205/107503/77630/21367/20681/227325/14432/18810/50913/13654/18212/17391/19242/20666/13649/18128
GO:0051302	GO:0051302	regulation of cell division	91	0.338055	1.54816	0.0114139	0.174422	0.157057	1267	tags=29%, list=17%, signal=24%	14176/18654/16002/12795/13388/22339/11789/77889/19242/68112/12048/20319/12314/12531/18754/11799/23988/57028/67903/56452/75565/54673/52276/56194/18226/26934
GO:0072210	GO:0072210	metanephric nephron development	14	0.591934	1.80852	0.0116624	0.175078	0.157648	487	tags=36%, list=7%, signal=33%	15208/15205/20681/13653/107515
GO:0007020	GO:0007020	microtubule nucleation	25	-0.55219	-1.74022	0.0116338	0.175078	0.157648	308	tags=16%, list=4%, signal=15%	71276/72205/193740/15511
GO:0090083	GO:0090083	regulation of inclusion body assembly	13	-0.653061	-1.73268	0.0116636	0.175078	0.157648	1390	tags=54%, list=19%, signal=44%	56812/50720/15512/20660/11816/193740/15511
GO:0051180	GO:0051180	vitamin transport	16	-0.604196	-1.7006	0.0116342	0.175078	0.157648	1038	tags=50%, list=14%, signal=43%	19662/19300/26357/20525/20528/20527/27416/17250
GO:0045765	GO:0045765	regulation of angiogenesis	99	0.339765	1.5602	0.0115634	0.175078	0.157648	324	tags=13%, list=4%, signal=13%	16392/18654/16002/20848/13388/14388/15901/15245/15368/106014/22339/15277/242705
GO:0002367	GO:0002367	cytokine production involved in immune response	34	-0.514239	-1.7272	0.011761	0.175639	0.158153	1433	tags=47%, list=19%, signal=38%	11600/18762/15275/21808/14466/192656/66824/16590/19165/240354/20361/225471/15064/16159/16173/22418
GO:0046879	GO:0046879	hormone secretion	159	0.281955	1.40829	0.011784	0.175639	0.158153	959	tags=22%, list=13%, signal=20%	16392/11516/230899/74551/381677/17932/16443/277978/66259/18795/19339/68039/71764/12290/13640/14672/20666/13649/54003/18012/16522/109305/18754/56455/11799/545156/22063/20677/16573/12288/19084/215999/52055/228355/67151
GO:0009164	GO:0009164	nucleoside catabolic process	12	-0.652098	-1.71318	0.0119827	0.177876	0.160168	1718	tags=67%, list=23%, signal=51%	71891/232449/17766/269378/22271/76654/224794/99586
GO:0039531	GO:0039531	regulation of viral-induced cytoplasmic pattern recognition receptor signaling pathway	19	-0.577511	-1.69965	0.0120181	0.177876	0.160168	220	tags=26%, list=3%, signal=26%	78781/30936/67664/193740/15511
GO:0045445	GO:0045445	myoblast differentiation	51	0.412225	1.69206	0.0121789	0.179628	0.161745	593	tags=24%, list=8%, signal=22%	16392/57266/13388/66993/18795/20681/20969/18810/78688/16852/18128/17927
GO:0002702	GO:0002702	positive regulation of production of molecular mediator of immune response	34	-0.510651	-1.71515	0.0126086	0.185321	0.166871	1412	tags=35%, list=19%, signal=29%	18762/15275/75698/19662/192656/66824/16590/240354/20361/225471/16173/22418
GO:0048261	GO:0048261	negative regulation of receptor-mediated endocytosis	14	0.585925	1.79016	0.0126765	0.185674	0.167189	455	tags=29%, list=6%, signal=27%	100102/268445/22248/107065
GO:0010677	GO:0010677	negative regulation of cellular carbohydrate metabolic process	27	0.492725	1.79481	0.0128614	0.18722	0.168581	573	tags=22%, list=8%, signal=21%	56312/14783/20848/15937/319801/67078
GO:0097191	GO:0097191	extrinsic apoptotic signaling pathway	104	-0.364202	-1.49083	0.0128705	0.18722	0.168581	1131	tags=21%, list=15%, signal=18%	21808/16410/20377/216439/66824/12633/170755/19165/29810/75736/69660/14051/12369/19211/83925/22601/21416/97998/16159/16173/193740/15511
GO:0060538	GO:0060538	skeletal muscle organ development	84	0.35296	1.58683	0.0129775	0.188129	0.1694	593	tags=25%, list=8%, signal=23%	56312/270190/237611/16002/13388/17932/20289/20681/16656/227325/20467/18810/21380/13653/13654/14281/22634/11910/20666/18128/17927
GO:1905606	GO:1905606	regulation of presynapse assembly	18	-0.59036	-1.70649	0.0130245	0.188166	0.169433	666	tags=33%, list=9%, signal=30%	74762/13643/76965/16180/18213/331461
GO:0010718	GO:0010718	positive regulation of epithelial to mesenchymal transition	20	0.524113	1.75258	0.0131956	0.188706	0.169919	38	tags=10%, list=1%, signal=10%	16392/384009
GO:0006413	GO:0006413	translational initiation	65	0.366632	1.57831	0.0131731	0.188706	0.169919	1863	tags=52%, list=25%, signal=40%	13685/69860/20918/269037/66405/224045/66892/66882/20492/16418/68969/433702/68995/13684/18148/26987/217869/55944/13690/66085/13669/213541/218629/17974/217715/105782/67710/69241/67204/68135/13205/20181/73830/13665
GO:1903530	GO:1903530	regulation of secretion by cell	285	0.239057	1.28374	0.0131917	0.188706	0.169919	1033	tags=23%, list=14%, signal=20%	16392/14812/11516/230899/74551/17932/16443/14299/80976/12890/15368/66259/18795/19339/110834/20969/22249/171580/68039/71764/12290/13640/269951/18212/56513/14672/20666/13649/18128/54003/11981/19349/12048/16522/109305/14678/26399/13446/242662/18754/11785/56455/11799/56013/545156/215449/11419/22063/20677/22350/16573/12288/19084/215999/52055/228355/17319/13121/110279/67151/20983/171180/67767/109905/22…
GO:0045912	GO:0045912	negative regulation of carbohydrate metabolic process	29	0.476491	1.75846	0.0136276	0.193171	0.173939	573	tags=21%, list=8%, signal=19%	56312/14783/20848/15937/319801/67078
GO:0003254	GO:0003254	regulation of membrane depolarization	26	-0.527759	-1.67281	0.0136903	0.193171	0.173939	529	tags=23%, list=7%, signal=22%	14609/15168/14167/12289/72821/20266
GO:0071219	GO:0071219	cellular response to molecule of bacterial origin	54	-0.441904	-1.61526	0.0136836	0.193171	0.173939	342	tags=17%, list=5%, signal=16%	240354/22038/17260/235527/70097/225471/16159/16173/22418
GO:0036293	GO:0036293	response to decreased oxygen levels	111	0.315595	1.47566	0.0135902	0.193171	0.173939	960	tags=24%, list=13%, signal=22%	14812/67749/18654/16526/22359/13685/12795/20510/231207/15368/22339/66568/101543/13653/78688/319801/18128/11486/18754/74769/11864/23988/69219/20191/19155/22278/56717
GO:0045648	GO:0045648	positive regulation of erythrocyte differentiation	17	-0.576801	-1.64491	0.0137797	0.193786	0.174493	14	tags=18%, list=0%, signal=18%	19090/193740/15511
GO:0043010	GO:0043010	camera-type eye development	159	0.27756	1.38634	0.0139103	0.194975	0.175564	577	tags=18%, list=8%, signal=17%	15208/18742/270190/58208/20848/12577/20510/13388/12677/66993/54352/15205/22141/58235/59058/13508/20681/22339/16870/11789/11911/13193/18212/19242/20666/13649/18128/18012
GO:0098739	GO:0098739	import across plasma membrane	68	0.367476	1.5875	0.0141787	0.198081	0.178361	629	tags=18%, list=8%, signal=16%	11989/57738/21366/20510/16515/16511/17254/12290/11987/55963/279561/16522
GO:0009166	GO:0009166	nucleotide catabolic process	32	-0.500262	-1.65699	0.0142836	0.198288	0.178548	813	tags=28%, list=11%, signal=25%	237868/67725/12799/22271/76654/18577/23959/99586/18573
GO:0098657	GO:0098657	import into cell	91	0.333876	1.52903	0.0142873	0.198288	0.178548	560	tags=14%, list=8%, signal=13%	11989/57738/21366/20510/16515/229791/16511/17254/12290/11987/14077/55963/279561
GO:0090100	GO:0090100	positive regulation of transmembrane receptor protein serine/threonine kinase signaling pathway	39	0.43141	1.68479	0.0144111	0.199354	0.179507	650	tags=23%, list=9%, signal=21%	15208/12577/15205/94187/16007/20666/18128/68431/225743
GO:0035051	GO:0035051	cardiocyte differentiation	68	0.366086	1.58149	0.0144886	0.199773	0.179885	960	tags=24%, list=13%, signal=21%	16392/13388/15205/234214/22339/18810/20672/13649/18128/17927/13052/23988/216850/12301/56376/56717
GO:0051085	GO:0051085	chaperone cofactor-dependent protein refolding	21	-0.551326	-1.66621	0.0146041	0.200711	0.180729	977	tags=24%, list=13%, signal=21%	67035/70604/15512/193740/15511
GO:0140058	GO:0140058	neuron projection arborization	16	0.564606	1.80287	0.0150324	0.20164	0.181566	161	tags=19%, list=2%, signal=18%	140486/80883/71751
GO:0090313	GO:0090313	regulation of protein targeting to membrane	16	0.562471	1.79605	0.0152397	0.20164	0.181566	730	tags=31%, list=10%, signal=28%	20510/15444/12297/15461/12569
GO:0003230	GO:0003230	cardiac atrium development	17	0.540873	1.7582	0.0147409	0.20164	0.181566	305	tags=18%, list=4%, signal=17%	16392/22761/16007
GO:0021510	GO:0021510	spinal cord development	45	0.430811	1.74348	0.0152317	0.20164	0.181566	342	tags=16%, list=5%, signal=15%	16392/233552/22359/13388/16975/16911/50913
GO:0086019	GO:0086019	cell-cell signaling involved in cardiac conduction	13	-0.64408	-1.70885	0.0149608	0.20164	0.181566	516	tags=31%, list=7%, signal=29%	15168/12289/12296/20266
GO:0002347	GO:0002347	response to tumor cell	11	-0.673822	-1.70484	0.0148421	0.20164	0.181566	1132	tags=55%, list=15%, signal=46%	77777/56338/18129/207181/15064/16159
GO:0019226	GO:0019226	transmission of nerve impulse	29	-0.504821	-1.62185	0.0149166	0.20164	0.181566	770	tags=45%, list=10%, signal=40%	12300/14466/81904/80297/12298/13483/16531/56508/53321/110876/14167/18213/20266
GO:0008589	GO:0008589	regulation of smoothened signaling pathway	54	-0.437485	-1.59911	0.0153054	0.20164	0.181566	2420	tags=65%, list=33%, signal=44%	71228/19206/22158/14632/319757/240888/74019/56427/380614/14633/67345/207425/654470/18984/277939/14451/110350/15376/19883/73668/269878/20377/78795/81896/380718/244585/67661/106633/16576/58198/70300/59056/67009/14634/14734
GO:2001236	GO:2001236	regulation of extrinsic apoptotic signaling pathway	71	-0.406222	-1.55731	0.014941	0.20164	0.181566	1131	tags=25%, list=15%, signal=22%	21808/16410/20377/216439/66824/12633/170755/19165/75736/69660/14051/19211/83925/22601/21416/97998/193740/15511
GO:0010675	GO:0010675	regulation of cellular carbohydrate metabolic process	77	0.349829	1.54848	0.0148896	0.20164	0.181566	289	tags=9%, list=4%, signal=9%	56312/230784/14783/16002/20848/108682/15937
GO:0043467	GO:0043467	regulation of generation of precursor metabolites and energy	77	0.34764	1.53879	0.0151919	0.20164	0.181566	289	tags=9%, list=4%, signal=9%	56312/14783/16002/20848/102060/108037/15937
GO:0019827	GO:0019827	stem cell population maintenance	97	0.333765	1.53517	0.0153386	0.20164	0.181566	536	tags=10%, list=7%, signal=10%	15208/140486/22773/20848/13388/15205/11789/17391/77889/19242
GO:0048562	GO:0048562	embryonic organ morphogenesis	123	-0.351126	-1.4758	0.015268	0.20164	0.181566	1312	tags=29%, list=18%, signal=25%	269878/212712/74025/18424/21808/11921/19662/16869/81896/100169/20682/216560/17828/98711/67671/67661/18208/106633/14051/11941/18129/14609/12814/213081/70300/11695/12614/22601/17260/14634/16206/21416/51938/14238/18423/22418
GO:0032868	GO:0032868	response to insulin	150	0.280315	1.38167	0.015255	0.20164	0.181566	641	tags=13%, list=9%, signal=12%	230784/14783/100102/13685/16002/231207/74551/381677/104215/12445/18795/18709/11789/13653/13654/23921/18710/15461/14678/19246
GO:0031058	GO:0031058	positive regulation of histone modification	45	0.428663	1.73479	0.0154966	0.203087	0.182868	266	tags=7%, list=4%, signal=6%	16392/81703/22339
GO:0002700	GO:0002700	regulation of production of molecular mediator of immune response	49	-0.432499	-1.55921	0.0155584	0.203267	0.183031	1477	tags=33%, list=20%, signal=26%	214763/11600/18762/15275/19090/21808/75698/19662/192656/66824/16590/240354/20361/225471/16173/22418
GO:0006144	GO:0006144	purine nucleobase metabolic process	14	-0.605767	-1.64463	0.0156676	0.203743	0.183459	31	tags=14%, list=0%, signal=14%	99586/22139
GO:0045089	GO:0045089	positive regulation of innate immune response	84	-0.391204	-1.5441	0.015691	0.203743	0.183459	457	tags=14%, list=6%, signal=14%	67486/384309/100040462/22038/78781/30936/225471/67664/16159/22418/193740/15511
GO:0043489	GO:0043489	RNA stabilization	27	0.484723	1.76566	0.0160482	0.203785	0.183497	266	tags=15%, list=4%, signal=14%	140486/140488/12696/22339
GO:1900151	GO:1900151	regulation of nuclear-transcribed mRNA catabolic process, deadenylation-dependent decay	14	0.577237	1.76362	0.0161245	0.203785	0.183497	404	tags=14%, list=5%, signal=14%	140486/332397
GO:0009261	GO:0009261	ribonucleotide catabolic process	23	-0.562448	-1.73473	0.0158239	0.203785	0.183497	359	tags=26%, list=5%, signal=25%	22271/76654/18577/23959/99586/18573
GO:0099174	GO:0099174	regulation of presynapse organization	21	-0.54642	-1.65139	0.0161648	0.203785	0.183497	666	tags=29%, list=9%, signal=26%	74762/13643/76965/16180/18213/331461
GO:0038034	GO:0038034	signal transduction in absence of ligand	30	-0.50306	-1.63494	0.0162238	0.203785	0.183497	1131	tags=27%, list=15%, signal=23%	21808/16410/216439/170755/29810/14051/193740/15511
GO:0097192	GO:0097192	extrinsic apoptotic signaling pathway in absence of ligand	30	-0.50306	-1.63494	0.0162238	0.203785	0.183497	1131	tags=27%, list=15%, signal=23%	21808/16410/216439/170755/29810/14051/193740/15511
GO:0099054	GO:0099054	presynapse assembly	27	-0.509792	-1.61729	0.0158473	0.203785	0.183497	666	tags=30%, list=9%, signal=27%	74762/26875/19211/13643/76965/16180/18213/331461
GO:0031929	GO:0031929	TOR signaling	71	0.354918	1.54347	0.0161885	0.203785	0.183497	198	tags=8%, list=3%, signal=8%	11989/230784/109270/14456/13685/77976
GO:0048593	GO:0048593	camera-type eye morphogenesis	71	0.354457	1.54147	0.0161885	0.203785	0.183497	564	tags=24%, list=8%, signal=22%	18742/270190/20848/20510/13388/12677/54352/58235/59058/13508/20681/22339/11911/18212/19242/20666/18128
GO:0050730	GO:0050730	regulation of peptidyl-tyrosine phosphorylation	97	0.332068	1.52736	0.0158154	0.203785	0.183497	412	tags=10%, list=6%, signal=10%	16392/15208/14456/16002/12805/16975/15205/22339/22248/13640
GO:0015748	GO:0015748	organophosphate ester transport	53	-0.415534	-1.5099	0.0160727	0.203785	0.183497	1976	tags=45%, list=27%, signal=34%	69906/319581/16835/17777/192287/14385/50770/66972/76295/108138/50771/100604/19679/320091/14609/27416/17250/497097/22038/11982/235527/11816/77619/18669
GO:0002526	GO:0002526	acute inflammatory response	16	0.554988	1.77215	0.0168985	0.204702	0.184323	80	tags=19%, list=1%, signal=19%	56312/11516/20848
GO:0072028	GO:0072028	nephron morphogenesis	29	0.467067	1.72368	0.016834	0.204702	0.184323	487	tags=28%, list=7%, signal=26%	15208/18654/16776/15205/20681/22339/67087/107515
GO:0072088	GO:0072088	nephron epithelium morphogenesis	29	0.467067	1.72368	0.016834	0.204702	0.184323	487	tags=28%, list=7%, signal=26%	15208/18654/16776/15205/20681/22339/67087/107515
GO:0003151	GO:0003151	outflow tract morphogenesis	33	0.448303	1.68162	0.0166667	0.204702	0.184323	688	tags=27%, list=9%, signal=25%	16392/22761/15205/22339/21380/20666/18128/20319/268902
GO:0042026	GO:0042026	protein refolding	12	-0.639231	-1.67938	0.016636	0.204702	0.184323	14	tags=25%, list=0%, signal=25%	15512/193740/15511
GO:1900225	GO:1900225	regulation of NLRP3 inflammasome complex assembly	10	-0.671098	-1.66993	0.0169256	0.204702	0.184323	419	tags=40%, list=6%, signal=38%	59125/18760/75083/19106
GO:0006692	GO:0006692	prostanoid metabolic process	15	-0.607434	-1.66949	0.01661	0.204702	0.184323	587	tags=33%, list=8%, signal=31%	14862/77219/67103/14726/19215
GO:0006693	GO:0006693	prostaglandin metabolic process	15	-0.607434	-1.66949	0.01661	0.204702	0.184323	587	tags=33%, list=8%, signal=31%	14862/77219/67103/14726/19215
GO:0021533	GO:0021533	cell differentiation in hindbrain	16	-0.591036	-1.66355	0.0164033	0.204702	0.184323	1430	tags=50%, list=19%, signal=40%	15376/19883/73668/16869/11941/114142/57754/76484
GO:0008637	GO:0008637	apoptotic mitochondrial changes	63	0.351735	1.50654	0.0164591	0.204702	0.184323	1184	tags=33%, list=16%, signal=28%	72930/18164/12123/29816/56772/15937/15277/20656/78688/105675/73689/14297/12048/68350/11740/12122/66525/381038/19823/51800/54673
GO:0042886	GO:0042886	amide transport	177	0.282646	1.4286	0.016754	0.204702	0.184323	962	tags=21%, list=13%, signal=19%	16392/57738/14812/11516/20510/74551/381677/17932/16443/277978/66259/18795/19339/71764/12290/13640/55963/18212/14672/13649/18012/16522/109305/18754/56455/11799/545156/22063/20677/16573/12288/19084/215999/52055/228355/67151/20983
GO:0070482	GO:0070482	response to oxygen levels	123	0.296441	1.40826	0.0168568	0.204702	0.184323	960	tags=24%, list=13%, signal=22%	14812/67749/18654/16526/22359/13685/12795/20510/231207/15368/22339/66568/101543/13653/20656/78688/319801/18128/17927/11486/18754/66290/74769/11864/23988/69219/20191/19155/22278/56717
GO:0009914	GO:0009914	hormone transport	162	0.272086	1.35757	0.0164699	0.204702	0.184323	959	tags=23%, list=13%, signal=20%	16392/11516/230899/74551/381677/17932/16443/17254/277978/66259/18795/19339/68039/71764/12290/13640/14672/20666/13649/54003/18012/16522/109305/18754/56455/11799/545156/22063/20677/20539/16573/12288/19084/215999/52055/228355/67151
GO:0042551	GO:0042551	neuron maturation	28	0.449212	1.64676	0.0170301	0.20538	0.184933	478	tags=25%, list=6%, signal=23%	13842/12577/71751/54352/21367/269116/23859
GO:0045604	GO:0045604	regulation of epidermal cell differentiation	18	0.563104	1.86397	0.0176074	0.20589	0.185392	182	tags=17%, list=2%, signal=16%	15208/13388/15205
GO:0021895	GO:0021895	cerebral cortex neuron differentiation	11	0.649763	1.82761	0.0175085	0.20589	0.185392	244	tags=27%, list=3%, signal=26%	233552/15205/21367
GO:0060123	GO:0060123	regulation of growth hormone secretion	10	0.651941	1.7819	0.0176031	0.20589	0.185392	940	tags=40%, list=13%, signal=35%	11516/16443/545156/228355
GO:0045682	GO:0045682	regulation of epidermis development	21	0.516372	1.74348	0.0174284	0.20589	0.185392	182	tags=14%, list=2%, signal=14%	15208/13388/15205
GO:0045932	GO:0045932	negative regulation of muscle contraction	11	-0.667929	-1.68993	0.0174542	0.20589	0.185392	635	tags=45%, list=9%, signal=42%	71544/16531/11555/54598/98660
GO:0046633	GO:0046633	alpha-beta T cell proliferation	13	-0.636376	-1.68841	0.0175524	0.20589	0.185392	1856	tags=69%, list=25%, signal=52%	208650/16452/16396/192656/20535/12505/18761/16159/16173
GO:0046640	GO:0046640	regulation of alpha-beta T cell proliferation	13	-0.636376	-1.68841	0.0175524	0.20589	0.185392	1856	tags=69%, list=25%, signal=52%	208650/16452/16396/192656/20535/12505/18761/16159/16173
GO:0032609	GO:0032609	type II interferon production	31	0.43524	1.61128	0.017565	0.20589	0.185392	597	tags=26%, list=8%, signal=24%	16392/23882/14456/22761/19720/16423/75234/15461
GO:0071383	GO:0071383	cellular response to steroid hormone stimulus	67	0.365048	1.57249	0.0173788	0.20589	0.185392	593	tags=13%, list=8%, signal=12%	16392/67749/13685/74551/20606/77006/18212/77889/17927
GO:0030048	GO:0030048	actin filament-based movement	51	-0.427869	-1.55514	0.0172391	0.20589	0.185392	392	tags=18%, list=5%, signal=17%	319710/71653/16480/12289/14726/98660/12296/72821/20266
GO:0034101	GO:0034101	erythrocyte homeostasis	75	-0.388974	-1.50958	0.0172245	0.20589	0.185392	878	tags=15%, list=12%, signal=13%	319653/12633/16590/74443/13423/16909/241525/15122/193740/15511/110257
GO:0006690	GO:0006690	icosanoid metabolic process	20	-0.552944	-1.65194	0.0176991	0.206392	0.185844	587	tags=30%, list=8%, signal=28%	14862/77219/224814/67103/14726/19215
GO:0051098	GO:0051098	regulation of binding	185	0.263812	1.33732	0.0178054	0.207061	0.186447	275	tags=8%, list=4%, signal=8%	16392/215243/100102/12575/18996/13592/22761/66993/15901/15205/15368/72828/29816/16870/227120
GO:0045859	GO:0045859	regulation of protein kinase activity	269	0.245675	1.30977	0.017977	0.207914	0.187215	960	tags=20%, list=13%, signal=18%	230784/230126/11516/12575/23882/14456/22359/230899/12577/20510/12427/14388/16975/71751/12445/72828/66259/22032/12447/22339/217410/110834/16007/23790/18810/22248/21987/11789/13653/19099/19720/21754/13649/15461/68045/20319/19246/12531/26399/12569/56013/74769/19087/19699/18767/67468/15502/16653/23938/19084/64143/17319/22223/56717
GO:0045597	GO:0045597	positive regulation of cell differentiation	391	0.22778	1.27157	0.0179565	0.207914	0.187215	841	tags=19%, list=11%, signal=18%	16392/21366/230126/12608/384009/233552/18845/14456/16728/384061/20848/18996/18013/18039/16975/66993/71751/13389/15205/72147/240843/12447/13508/18795/20681/22339/16007/56320/50913/16477/74490/21380/11789/13654/14281/13640/20656/13193/67087/18212/17755/19242/106522/20666/13649/18128/18053/19241/16885/18012/17927/108100/53626/14297/18223/20319/68219/353310/22041/11486/114584/18081/268902/11858/54515…
GO:0033143	GO:0033143	regulation of intracellular steroid hormone receptor signaling pathway	32	0.469113	1.74522	0.0180413	0.20809	0.187373	507	tags=12%, list=7%, signal=12%	16392/77006/18212/77889
GO:0002790	GO:0002790	peptide secretion	138	0.284818	1.3832	0.0183519	0.210525	0.189566	959	tags=22%, list=13%, signal=20%	16392/11516/74551/381677/17932/16443/277978/66259/18795/19339/71764/12290/13640/14672/13649/18012/16522/109305/18754/56455/11799/545156/22063/20677/16573/12288/19084/215999/52055/228355/67151
GO:0030072	GO:0030072	peptide hormone secretion	138	0.284818	1.3832	0.0183519	0.210525	0.189566	959	tags=22%, list=13%, signal=20%	16392/11516/74551/381677/17932/16443/277978/66259/18795/19339/71764/12290/13640/14672/13649/18012/16522/109305/18754/56455/11799/545156/22063/20677/16573/12288/19084/215999/52055/228355/67151
GO:0002274	GO:0002274	myeloid leukocyte activation	56	-0.412571	-1.51214	0.018421	0.210746	0.189765	963	tags=27%, list=13%, signal=23%	17470/66824/14824/16590/15979/16476/18129/18159/14268/12326/22038/320910/19215/16173/22418
GO:0019400	GO:0019400	alditol metabolic process	10	0.648738	1.77314	0.018609	0.212323	0.191185	1504	tags=70%, list=20%, signal=56%	74551/14635/67078/71883/21991/11677/230027
GO:0021536	GO:0021536	diencephalon development	30	0.450864	1.65537	0.0187863	0.21377	0.192487	342	tags=17%, list=5%, signal=16%	16392/230025/18996/15205/50913
GO:0048483	GO:0048483	autonomic nervous system development	15	0.572668	1.78656	0.0193696	0.214545	0.193186	1021	tags=60%, list=14%, signal=52%	15205/78286/20681/21380/13654/20666/53626/20677/110532
GO:0010939	GO:0010939	regulation of necrotic cell death	27	0.475552	1.73225	0.0194626	0.214545	0.193186	9	tags=7%, list=0%, signal=7%	56312/21366
GO:2000269	GO:2000269	regulation of fibroblast apoptotic process	12	0.613393	1.72872	0.0193865	0.214545	0.193186	395	tags=25%, list=5%, signal=24%	56312/14456/11789
GO:0031116	GO:0031116	positive regulation of microtubule polymerization	20	-0.548346	-1.6382	0.0192575	0.214545	0.193186	14	tags=15%, list=0%, signal=15%	17762/193740/15511
GO:0002753	GO:0002753	cytosolic pattern recognition receptor signaling pathway	27	-0.504224	-1.59963	0.0189503	0.214545	0.193186	220	tags=19%, list=3%, signal=18%	78781/30936/67664/193740/15511
GO:0035567	GO:0035567	non-canonical Wnt signaling pathway	27	-0.503754	-1.59814	0.0191719	0.214545	0.193186	1078	tags=33%, list=14%, signal=29%	329795/20377/68259/380718/14369/12614/93897/14734/22418
GO:0015914	GO:0015914	phospholipid transport	36	-0.465016	-1.5817	0.0192107	0.214545	0.193186	2195	tags=53%, list=29%, signal=37%	219149/54667/319581/16835/17777/50770/76295/108138/50771/19679/320091/17250/497097/22038/11982/235527/11816/77619/18669
GO:0098727	GO:0098727	maintenance of cell number	99	0.325072	1.49273	0.0193405	0.214545	0.193186	182	tags=6%, list=2%, signal=6%	15208/140486/22773/20848/13388/15205
GO:0030902	GO:0030902	hindbrain development	96	0.323709	1.4892	0.0192453	0.214545	0.193186	660	tags=20%, list=9%, signal=18%	20370/270190/18845/18996/18013/13388/12805/15205/107503/94187/78286/234734/13654/332397/56747/18012/18072/73750/69539
GO:0031330	GO:0031330	negative regulation of cellular catabolic process	119	0.297484	1.39932	0.019455	0.214545	0.193186	266	tags=8%, list=4%, signal=8%	140486/56312/20848/225020/140488/15368/12696/104009/211134/22339
GO:0048732	GO:0048732	gland development	174	0.274012	1.38993	0.0194594	0.214545	0.193186	672	tags=17%, list=9%, signal=16%	16392/12608/100102/58208/22773/16002/12577/74551/16776/15205/15368/22339/11692/16911/21380/11789/20656/11821/18102/225631/77889/19242/13649/18128/56436/53626/109305/78908/353310/11486
GO:0035239	GO:0035239	tube morphogenesis	362	0.223259	1.2301	0.0190733	0.214545	0.193186	640	tags=13%, list=9%, signal=13%	16392/15208/230126/57875/270190/18654/22773/20733/16002/20848/20510/13388/16776/14388/15901/15245/15205/17769/15368/106014/20681/22339/18709/16870/15277/16007/16911/242705/16477/21380/20358/83921/353156/67087/107515/18212/20672/19242/20666/18710/13649/18128/18053/22323/56332/14160/270685/20319
GO:0062207	GO:0062207	regulation of pattern recognition receptor signaling pathway	38	-0.465575	-1.60928	0.0195738	0.21521	0.193784	220	tags=16%, list=3%, signal=15%	78781/30936/225471/67664/193740/15511
GO:0010942	GO:0010942	positive regulation of cell death	303	0.233738	1.27967	0.0196485	0.215472	0.19402	880	tags=18%, list=12%, signal=16%	56312/21366/14812/18742/100102/72930/12575/16526/23882/18996/22253/77771/12123/20112/15368/29816/56772/16007/22249/21987/20450/216150/21981/11789/13653/14281/11911/20656/11910/18611/319801/19242/16852/18128/18053/18012/12048/107392/20319/26399/66642/11785/12569/50493/20438/12122/74769/17865/20677/276770/23988/15502/22192/21859
GO:0010765	GO:0010765	positive regulation of sodium ion transport	29	-0.493198	-1.5845	0.0199992	0.218751	0.196973	276	tags=21%, list=4%, signal=20%	11932/14167/11555/57816/13405/20266
GO:0072273	GO:0072273	metanephric nephron morphogenesis	11	0.64088	1.80262	0.0201097	0.219393	0.197551	487	tags=36%, list=7%, signal=34%	15208/15205/20681/107515
GO:0002821	GO:0002821	positive regulation of adaptive immune response	37	-0.463272	-1.5923	0.0205657	0.222894	0.200704	1752	tags=38%, list=24%, signal=29%	16452/268564/18762/27103/77777/75698/192656/66824/12505/240354/18761/15064/16159/16173
GO:0043271	GO:0043271	negative regulation of monoatomic ion transport	59	0.358529	1.51612	0.0204991	0.222894	0.200704	713	tags=20%, list=10%, signal=19%	100102/29867/11516/16511/12297/15205/11911/19720/105675/279561/12314/18754
GO:0023061	GO:0023061	signal release	243	0.248272	1.30604	0.0205886	0.222894	0.200704	1003	tags=22%, list=13%, signal=20%	16392/11516/230899/74551/381677/17932/16443/14299/80976/12890/277978/66259/18795/19339/110834/22249/68039/71764/12290/13640/18212/14672/20666/53627/13649/54003/18012/12048/64051/16522/109305/26399/13446/242662/18754/56455/11799/545156/215449/11419/22063/67826/20677/16573/12288/19084/215999/52055/228355/17319/67151/20983/171180/67767
GO:0030857	GO:0030857	negative regulation of epithelial cell differentiation	22	0.53862	1.8378	0.0210514	0.226169	0.203653	266	tags=23%, list=4%, signal=22%	15208/13388/15901/15205/22339
GO:0009176	GO:0009176	pyrimidine deoxyribonucleoside monophosphate metabolic process	10	-0.663374	-1.65071	0.0209497	0.226169	0.203653	359	tags=30%, list=5%, signal=29%	22271/76654/99586
GO:0009725	GO:0009725	response to hormone	296	0.237495	1.29565	0.0210237	0.226169	0.203653	641	tags=11%, list=9%, signal=11%	16392/13842/230784/14783/67749/100102/13685/16002/20848/231207/74551/381677/104215/232087/12445/15368/18795/20606/18709/11789/13653/13654/13640/77006/23921/18212/77889/18710/18128/17927/15461/56436/14678/19246
GO:0046386	GO:0046386	deoxyribose phosphate catabolic process	10	-0.661529	-1.64612	0.0214232	0.229001	0.206202	359	tags=30%, list=5%, signal=29%	22271/76654/99586
GO:0034765	GO:0034765	regulation of monoatomic ion transmembrane transport	180	-0.316552	-1.39557	0.0213984	0.229001	0.206202	964	tags=27%, list=13%, signal=24%	238161/24012/20866/14467/14169/15275/20530/12300/19057/21808/13057/58234/65973/12856/15512/110862/81904/19165/16498/69563/22782/211468/98741/12298/15168/13483/19211/74777/18760/110784/16531/11932/110876/14167/432442/12289/16497/11555/57816/13405/170738/14813/98660/238271/18669/18823/12296/72821/20266
GO:0018212	GO:0018212	peptidyl-tyrosine modification	119	0.293467	1.38043	0.0214851	0.229084	0.206277	807	tags=16%, list=11%, signal=14%	16392/15208/14456/16002/12805/16975/15205/22339/22248/13640/22022/106522/13649/20319/19246/18754/56013/19699/23897
GO:0043457	GO:0043457	regulation of cellular respiration	29	0.458751	1.69299	0.0216437	0.230195	0.207278	181	tags=10%, list=2%, signal=10%	56312/102060/108037
GO:0048255	GO:0048255	mRNA stabilization	22	0.536565	1.83078	0.0217493	0.230223	0.207303	266	tags=18%, list=4%, signal=18%	140486/140488/12696/22339
GO:0001964	GO:0001964	startle response	13	0.610781	1.80106	0.0218094	0.230223	0.207303	320	tags=23%, list=4%, signal=22%	14812/12140/56320
GO:0003209	GO:0003209	cardiac atrium morphogenesis	15	0.568756	1.77436	0.0218094	0.230223	0.207303	305	tags=20%, list=4%, signal=19%	16392/22761/16007
GO:0003231	GO:0003231	cardiac ventricle development	58	0.355781	1.50573	0.0219346	0.230968	0.207974	828	tags=22%, list=11%, signal=20%	16392/18996/22761/66993/15205/16007/16911/20666/18128/20319/268902/17131/20677
GO:0051084	GO:0051084	'de novo' post-translational protein folding	26	-0.504638	-1.59952	0.022233	0.232951	0.209759	977	tags=19%, list=13%, signal=17%	67035/70604/15512/193740/15511
GO:0006110	GO:0006110	regulation of glycolytic process	28	0.4351	1.59503	0.022218	0.232951	0.209759	513	tags=14%, list=7%, signal=13%	56312/20848/15937/319801
GO:0086003	GO:0086003	cardiac muscle cell contraction	27	-0.49387	-1.56678	0.0224965	0.234969	0.211576	241	tags=22%, list=3%, signal=22%	16480/12289/98660/12296/72821/20266
GO:0048736	GO:0048736	appendage development	83	-0.376525	-1.48067	0.0225921	0.234969	0.211576	945	tags=30%, list=13%, signal=27%	65973/81896/21821/68259/380718/234740/20682/19165/216560/98711/244585/67661/106633/18129/14609/58198/213081/70300/11695/64075/14634/544696/230857/14734/22418
GO:0060173	GO:0060173	limb development	83	-0.376525	-1.48067	0.0225921	0.234969	0.211576	945	tags=30%, list=13%, signal=27%	65973/81896/21821/68259/380718/234740/20682/19165/216560/98711/244585/67661/106633/18129/14609/58198/213081/70300/11695/64075/14634/544696/230857/14734/22418
GO:0051091	GO:0051091	positive regulation of DNA-binding transcription factor activity	106	-0.353854	-1.45317	0.0231154	0.239822	0.215946	1001	tags=21%, list=13%, signal=18%	192656/17470/94353/101540/66824/67916/12633/16590/19211/18760/240354/19106/71371/16480/12289/16180/225471/18761/16173/22418/193740/15511
GO:0043408	GO:0043408	regulation of MAPK cascade	267	0.240205	1.28603	0.0231793	0.239898	0.216014	954	tags=21%, list=13%, signal=19%	13842/14812/270190/11516/384009/23882/14456/230899/244923/16728/16002/76829/14388/71751/15901/22032/18795/22339/18709/16007/319520/21987/21380/11789/20358/29811/74178/19099/11910/18212/77889/13649/18128/18053/15461/14678/20319/19246/26399/240672/18754/74769/66208/215449/22350/23988/15258/52033/20187/15502/16653/21859/23938/228355/17319/22223
GO:0003176	GO:0003176	aortic valve development	10	-0.655699	-1.63161	0.0235536	0.240828	0.216852	768	tags=50%, list=10%, signal=45%	20682/13717/12006/15213/18018
GO:0021702	GO:0021702	cerebellar Purkinje cell differentiation	10	-0.655579	-1.63132	0.0235536	0.240828	0.216852	1385	tags=60%, list=19%, signal=49%	19883/73668/16869/11941/114142/57754
GO:0045744	GO:0045744	negative regulation of G protein-coupled receptor signaling pathway	21	-0.522625	-1.57947	0.0235268	0.240828	0.216852	602	tags=29%, list=8%, signal=26%	14773/244585/12323/105171/11555/13429
GO:0006458	GO:0006458	'de novo' protein folding	27	-0.490591	-1.55638	0.0233874	0.240828	0.216852	977	tags=19%, list=13%, signal=16%	67035/70604/15512/193740/15511
GO:0009611	GO:0009611	response to wounding	189	-0.316354	-1.41082	0.0233671	0.240828	0.216852	1290	tags=26%, list=17%, signal=22%	17181/71436/192236/19271/20512/12767/269473/21808/16001/381792/14824/65079/20511/13713/67916/237868/12633/18441/69563/72461/16476/18129/14609/18007/100503636/18159/12369/433855/19211/69964/12505/14369/14268/11747/19296/19128/12614/22601/224794/11816/11555/18213/72735/18761/14813/14726/22418/80748/20194
GO:1902373	GO:1902373	negative regulation of mRNA catabolic process	27	0.468125	1.7052	0.0240197	0.240937	0.216951	266	tags=15%, list=4%, signal=14%	140486/140488/12696/22339
GO:0060415	GO:0060415	muscle tissue morphogenesis	27	0.468001	1.70475	0.0240197	0.240937	0.216951	109	tags=11%, list=1%, signal=11%	16392/18996/22761
GO:0003283	GO:0003283	atrial septum development	12	0.594642	1.67588	0.0239623	0.240937	0.216951	305	tags=25%, list=4%, signal=24%	16392/22761/16007
GO:0019228	GO:0019228	neuronal action potential	11	-0.655553	-1.65862	0.0236284	0.240937	0.216951	1874	tags=73%, list=25%, signal=55%	230103/11735/14466/13483/16531/56508/110876/14167
GO:0002791	GO:0002791	regulation of peptide secretion	114	0.301001	1.40873	0.0238663	0.240937	0.216951	1146	tags=27%, list=15%, signal=23%	16392/11516/74551/17932/16443/66259/18795/71764/12290/13640/14672/13649/16522/109305/18754/56455/11799/545156/22063/20677/16573/12288/19084/215999/228355/67151/67767/68267/66461/223527/12801
GO:0090087	GO:0090087	regulation of peptide transport	114	0.301001	1.40873	0.0238663	0.240937	0.216951	1146	tags=27%, list=15%, signal=23%	16392/11516/74551/17932/16443/66259/18795/71764/12290/13640/14672/13649/16522/109305/18754/56455/11799/545156/22063/20677/16573/12288/19084/215999/228355/67151/67767/68267/66461/223527/12801
GO:0090276	GO:0090276	regulation of peptide hormone secretion	114	0.301001	1.40873	0.0238663	0.240937	0.216951	1146	tags=27%, list=15%, signal=23%	16392/11516/74551/17932/16443/66259/18795/71764/12290/13640/14672/13649/16522/109305/18754/56455/11799/545156/22063/20677/16573/12288/19084/215999/228355/67151/67767/68267/66461/223527/12801
GO:0008015	GO:0008015	blood circulation	168	0.267035	1.34033	0.0239131	0.240937	0.216951	790	tags=19%, list=11%, signal=17%	16392/668940/11516/14456/230899/20510/13388/16511/52589/54352/20112/78286/15368/66259/22339/15937/18810/12290/20656/67087/70729/14672/13649/333433/74840/12314/26399/11486/240672/232975/13052/17131
GO:0055008	GO:0055008	cardiac muscle tissue morphogenesis	23	0.509706	1.76945	0.0240934	0.241105	0.217102	109	tags=13%, list=1%, signal=13%	16392/18996/22761
GO:0006760	GO:0006760	folic acid-containing compound metabolic process	15	0.565001	1.76264	0.0242553	0.241293	0.217271	207	tags=27%, list=3%, signal=26%	216188/17768/108037/17769
GO:0045685	GO:0045685	regulation of glial cell differentiation	36	0.440013	1.70545	0.0242832	0.241293	0.217271	564	tags=25%, list=8%, signal=23%	15208/13389/15205/107503/21367/50913/13654/19242/18128
GO:0060041	GO:0060041	retina development in camera-type eye	76	0.352582	1.56579	0.0242458	0.241293	0.217271	656	tags=26%, list=9%, signal=24%	20848/20510/13388/12677/66993/54352/15205/22141/58235/59058/13508/20681/16870/11789/13193/18212/19242/18128/18012/234267
GO:0010507	GO:0010507	negative regulation of autophagy	45	0.409674	1.65795	0.0247679	0.245338	0.220913	256	tags=13%, list=3%, signal=13%	56312/20848/225020/15368/104009/211134
GO:0042073	GO:0042073	intraciliary transport	36	-0.457398	-1.55579	0.0248062	0.245338	0.220913	2149	tags=61%, list=29%, signal=44%	380614/76568/74682/56350/19893/78802/72421/110350/18536/73668/52028/81896/21821/264134/68259/213575/216560/67661/106633/213081/241950/70300
GO:0006883	GO:0006883	intracellular sodium ion homeostasis	11	-0.651927	-1.64945	0.0250579	0.24725	0.222635	358	tags=45%, list=5%, signal=43%	20512/110784/11932/57816/98660
GO:0051291	GO:0051291	protein heterooligomerization	12	0.591267	1.66637	0.0252125	0.248197	0.223487	649	tags=33%, list=9%, signal=30%	14812/232087/20135/68219
GO:1905314	GO:1905314	semi-lunar valve development	13	-0.622465	-1.6515	0.0253341	0.248239	0.223526	1131	tags=62%, list=15%, signal=52%	19876/21808/20682/18129/13717/12006/15213/18018
GO:0030336	GO:0030336	negative regulation of cell migration	116	0.290387	1.37344	0.0253083	0.248239	0.223526	1090	tags=28%, list=15%, signal=25%	214968/20848/117600/22240/260315/114886/106014/18795/18709/20467/23790/269951/353156/19242/18128/18053/67254/107392/20319/328949/11486/259302/22417/12317/16011/14026/23938/17319/110279/110532/107831/26356/29876
GO:0007519	GO:0007519	skeletal muscle tissue development	80	0.345466	1.52953	0.025473	0.249024	0.224232	593	tags=25%, list=8%, signal=23%	56312/270190/237611/16002/13388/20289/20681/16656/227325/20467/18810/21380/13653/13654/14281/22634/11910/20666/18128/17927
GO:0032651	GO:0032651	regulation of interleukin-1 beta production	28	0.429312	1.57381	0.0256148	0.249258	0.224443	401	tags=14%, list=5%, signal=14%	16392/20848/16007/13653
GO:1904036	GO:1904036	negative regulation of epithelial cell apoptotic process	28	0.429113	1.57308	0.0256148	0.249258	0.224443	395	tags=21%, list=5%, signal=20%	56312/57875/14456/15901/15368/11789
GO:0045880	GO:0045880	positive regulation of smoothened signaling pathway	20	-0.533888	-1.59501	0.025729	0.249796	0.224927	2536	tags=75%, list=34%, signal=50%	14632/319757/56427/380614/18984/14451/110350/15376/20377/78795/67661/16576/59056/67009/14734
GO:0044057	GO:0044057	regulation of system process	239	0.247418	1.30319	0.0258395	0.250294	0.225376	672	tags=15%, list=9%, signal=15%	16392/668940/14812/14456/18164/230899/54377/18585/20510/16511/12297/27140/54352/30937/29816/20606/110834/242667/22249/56320/12290/13654/228836/78688/16592/70729/13649/333433/279561/18128/18053/18012/108100/14678/12314/22041/11486
GO:2000179	GO:2000179	positive regulation of neural precursor cell proliferation	39	0.41062	1.6036	0.0259423	0.250716	0.225756	661	tags=26%, list=9%, signal=23%	18742/66993/94187/22339/16870/18128/18053/53626/14678/22041
GO:0070670	GO:0070670	response to interleukin-4	17	0.50322	1.6358	0.0262655	0.253261	0.228048	728	tags=24%, list=10%, signal=21%	12721/17025/18030/16898
GO:0001666	GO:0001666	response to hypoxia	107	0.310634	1.44004	0.0263763	0.253752	0.228489	960	tags=24%, list=13%, signal=21%	14812/67749/18654/16526/22359/13685/12795/231207/15368/22339/66568/101543/13653/78688/319801/18128/11486/18754/74769/11864/23988/69219/20191/19155/22278/56717
GO:0010829	GO:0010829	negative regulation of glucose transmembrane transport	15	0.560521	1.74867	0.0267011	0.255715	0.230257	514	tags=33%, list=7%, signal=31%	14783/104215/23921/18611/16592
GO:0043009	GO:0043009	chordate embryonic development	378	0.22264	1.23268	0.0266871	0.255715	0.230257	434	tags=9%, list=6%, signal=9%	16392/15208/14812/12608/18845/22773/20733/16002/100678/12577/13388/14388/114873/13389/54352/15205/58250/17769/20289/20681/22339/16870/16007/56320/16911/74440/22209/14570/18230/16477/21380/22682/20135/53414
GO:0072132	GO:0072132	mesenchyme morphogenesis	17	0.501079	1.62884	0.0271059	0.258512	0.232775	1	tags=6%, list=0%, signal=6%	16392
GO:0034605	GO:0034605	cellular response to heat	22	-0.526607	-1.6156	0.0271153	0.258512	0.232775	14	tags=18%, list=0%, signal=18%	17762/29810/193740/15511
GO:2000177	GO:2000177	regulation of neural precursor cell proliferation	66	0.353667	1.52287	0.0271919	0.25866	0.232908	661	tags=23%, list=9%, signal=21%	18742/11516/20733/12677/66993/94187/22339/16870/20419/19242/18128/18053/53626/14678/22041
GO:0050877	GO:0050877	nervous system process	401	-0.276627	-1.32941	0.0275028	0.261029	0.235042	1204	tags=23%, list=16%, signal=21%	12300/240057/242443/224129/20512/22393/12767/269473/209012/211612/14667/19662/14466/243725/12752/52028/52335/58234/260297/67378/224997/116837/14802/19085/16590/17762/12751/81904/18441/15211/19165/16498/76260/98711/67671/20528/15212/80297/20614/12298/74653/63959/16438/14051/11941/16476/26875/54422/12323/110893/70551/13483/19211/12814/23829/213081/114142/16531/13048/17035/12326/56508/53623/67374/14…
GO:0032024	GO:0032024	positive regulation of insulin secretion	52	0.372063	1.54519	0.0275951	0.26132	0.235304	959	tags=31%, list=13%, signal=27%	16392/74551/66259/18795/71764/14672/109305/18754/56455/22063/20677/16573/12288/19084/215999/67151
GO:0062099	GO:0062099	negative regulation of programmed necrotic cell death	11	0.615843	1.7322	0.0283531	0.265385	0.238964	6	tags=9%, list=0%, signal=9%	56312
GO:0051968	GO:0051968	positive regulation of synaptic transmission, glutamatergic	21	0.486953	1.64415	0.0282493	0.265385	0.238964	566	tags=29%, list=8%, signal=26%	14812/11516/54377/18212/13649/18053
GO:0031114	GO:0031114	regulation of microtubule depolymerization	24	0.4575	1.57908	0.0284632	0.265385	0.238964	1129	tags=42%, list=15%, signal=35%	260315/23805/20257/11789/17755/67254/68041/208158/16800/227634
GO:0043524	GO:0043524	negative regulation of neuron apoptotic process	105	0.308596	1.43769	0.0283181	0.265385	0.238964	858	tags=19%, list=12%, signal=17%	16392/12608/18996/20510/12721/16443/18039/15368/22339/234734/20656/18212/18053/15461/12048/11799/23988/17748/15258/16653
GO:0006865	GO:0006865	amino acid transport	63	0.335499	1.437	0.0283213	0.265385	0.238964	711	tags=17%, list=10%, signal=16%	11989/21366/14812/20510/17254/11987/55963/18212/64051/14057/214663
GO:0009913	GO:0009913	epidermal cell differentiation	63	0.33531	1.43619	0.0283213	0.265385	0.238964	339	tags=11%, list=5%, signal=11%	15208/58208/13388/15205/72333/18810/270893
GO:0040013	GO:0040013	negative regulation of locomotion	136	0.283638	1.37473	0.0284305	0.265385	0.238964	1203	tags=32%, list=16%, signal=28%	20733/214968/20848/117600/22240/260315/114886/106014/18795/18709/56320/20467/23790/20358/269951/353156/19242/18128/18053/228564/67254/107392/20319/328949/11486/259302/268902/22417/23988/20187/12317/16011/14026/23938/17319/110279/12631/110532/107831/26356/29876/17356/20355/60406
GO:0140112	GO:0140112	extracellular vesicle biogenesis	12	0.581381	1.63851	0.0293798	0.273329	0.246117	1128	tags=50%, list=15%, signal=42%	20969/66412/11981/19349/22088/27681
GO:0006337	GO:0006337	nucleosome disassembly	11	0.612324	1.7223	0.0299617	0.277523	0.249894	2184	tags=82%, list=29%, signal=58%	66993/12611/83796/20588/20586/93760/101612/57376/114741
GO:0032986	GO:0032986	protein-DNA complex disassembly	11	0.612324	1.7223	0.0299617	0.277523	0.249894	2184	tags=82%, list=29%, signal=58%	66993/12611/83796/20588/20586/93760/101612/57376/114741
GO:0072529	GO:0072529	pyrimidine-containing compound catabolic process	13	-0.617211	-1.63756	0.0300694	0.277912	0.250244	462	tags=54%, list=6%, signal=51%	52463/71891/214133/104776/22271/76654/99586
GO:0015800	GO:0015800	acidic amino acid transport	31	0.417228	1.54459	0.030366	0.280042	0.252162	97	tags=10%, list=1%, signal=10%	21366/14812/20510
GO:0035315	GO:0035315	hair cell differentiation	23	0.492988	1.71141	0.0305182	0.280833	0.252875	646	tags=26%, list=9%, signal=24%	15208/13388/15205/270893/18128/73750
GO:0048644	GO:0048644	muscle organ morphogenesis	29	0.444658	1.64098	0.0306121	0.281087	0.253103	109	tags=10%, list=1%, signal=10%	16392/18996/22761
GO:0046545	GO:0046545	development of primary female sexual characteristics	50	0.374564	1.5321	0.0318976	0.292257	0.263161	335	tags=12%, list=4%, signal=12%	56312/12608/11516/381677/22339/12841
GO:1903670	GO:1903670	regulation of sprouting angiogenesis	15	0.548837	1.71222	0.0320005	0.292414	0.263302	770	tags=33%, list=10%, signal=30%	13388/22339/242705/20358/74769
GO:0071353	GO:0071353	cellular response to interleukin-4	16	0.522119	1.6672	0.0327136	0.292414	0.263302	728	tags=25%, list=10%, signal=23%	12721/17025/18030/16898
GO:0034643	GO:0034643	establishment of mitochondrion localization, microtubule-mediated	16	0.522069	1.66704	0.0327136	0.292414	0.263302	976	tags=38%, list=13%, signal=33%	67749/18039/17755/16573/22223/235180
GO:0047497	GO:0047497	mitochondrion transport along microtubule	16	0.522069	1.66704	0.0327136	0.292414	0.263302	976	tags=38%, list=13%, signal=33%	67749/18039/17755/16573/22223/235180
GO:0048025	GO:0048025	negative regulation of mRNA splicing, via spliceosome	14	0.538082	1.64399	0.0332234	0.292414	0.263302	2629	tags=86%, list=35%, signal=56%	59092/225027/100041953/18148/57317/12261/108013/15387/231769/68035/108014/13548
GO:0050686	GO:0050686	negative regulation of mRNA processing	14	0.538082	1.64399	0.0332234	0.292414	0.263302	2629	tags=86%, list=35%, signal=56%	59092/225027/100041953/18148/57317/12261/108013/15387/231769/68035/108014/13548
GO:0050829	GO:0050829	defense response to Gram-negative bacterium	11	-0.640378	-1.62023	0.0331717	0.292414	0.263302	955	tags=45%, list=13%, signal=40%	66824/67067/18760/269855/15064
GO:0007339	GO:0007339	binding of sperm to zona pellucida	11	-0.640053	-1.61941	0.0331717	0.292414	0.263302	651	tags=18%, list=9%, signal=17%	20686/15511
GO:0035036	GO:0035036	sperm-egg recognition	11	-0.640053	-1.61941	0.0331717	0.292414	0.263302	651	tags=18%, list=9%, signal=17%	20686/15511
GO:0009116	GO:0009116	nucleoside metabolic process	25	-0.512697	-1.61576	0.0321234	0.292414	0.263302	359	tags=20%, list=5%, signal=19%	22271/76654/224794/23959/99586
GO:0120162	GO:0120162	positive regulation of cold-induced thermogenesis	39	0.395981	1.54643	0.0324906	0.292414	0.263302	514	tags=21%, list=7%, signal=19%	14783/12608/11516/23882/13592/22339/11789/16592
GO:0060251	GO:0060251	regulation of glial cell proliferation	28	0.418159	1.53293	0.0328683	0.292414	0.263302	1208	tags=43%, list=16%, signal=36%	11516/15205/269951/19242/20666/13649/18128/20539/16653/56717/13555/19047
GO:0044282	GO:0044282	small molecule catabolic process	152	-0.32886	-1.42347	0.0326223	0.292414	0.263302	1895	tags=40%, list=25%, signal=31%	246277/257633/227095/66948/12039/71891/12040/12908/109801/17425/232449/58875/17766/12036/100039707/66885/171210/66514/52430/269378/19299/384783/15275/56357/11364/12091/15107/64898/26874/19300/56050/113868/74114/78038/212647/26378/19125/18642/13808/13171/67885/15211/15212/12896/56174/16890/114663/19211/104776/18105/320204/52665/22271/107885/76654/17751/56794/224794/11816/13807/99586
GO:0018108	GO:0018108	peptidyl-tyrosine phosphorylation	118	0.288648	1.36225	0.0323562	0.292414	0.263302	807	tags=15%, list=11%, signal=14%	16392/15208/14456/16002/12805/16975/15205/22339/22248/13640/106522/13649/20319/19246/18754/56013/19699/23897
GO:0034976	GO:0034976	response to endoplasmic reticulum stress	136	0.280539	1.35971	0.033255	0.292414	0.263302	675	tags=11%, list=9%, signal=10%	69065/56312/230784/12608/64209/20856/18709/77006/11911/11910/74840/108159/12048/19246/66155
GO:0009607	GO:0009607	response to biotic stimulus	385	-0.272361	-1.30276	0.0332963	0.292414	0.263302	1043	tags=16%, list=14%, signal=15%	26874/16363/235504/545370/192656/66824/20787/14824/53859/14455/235047/106869/80876/237868/68810/12633/22782/56338/67248/67067/15979/56213/18129/70796/12369/19211/67486/384309/16172/18760/11810/56048/240354/100040462/19106/22038/22601/17260/207181/78781/235527/14734/320910/269855/11816/30936/16180/70097/225471/15064/56615/67664/237886/16159/319278/15122/16173/22418/217480/193740/15511/110257
GO:0001654	GO:0001654	eye development	179	0.251338	1.2756	0.0331893	0.292414	0.263302	577	tags=16%, list=8%, signal=15%	15208/18742/270190/58208/20848/12577/20510/13388/208936/12677/66993/54352/15205/22141/58235/59058/13508/20681/22339/16870/11789/11911/13193/18212/19242/20666/13649/18128/18012
GO:0150063	GO:0150063	visual system development	179	0.251338	1.2756	0.0331893	0.292414	0.263302	577	tags=16%, list=8%, signal=15%	15208/18742/270190/58208/20848/12577/20510/13388/208936/12677/66993/54352/15205/22141/58235/59058/13508/20681/22339/16870/11789/11911/13193/18212/19242/20666/13649/18128/18012
GO:0032870	GO:0032870	cellular response to hormone stimulus	238	0.239391	1.25816	0.0324158	0.292414	0.263302	722	tags=13%, list=10%, signal=12%	16392/13842/14783/67749/100102/13685/16002/20848/231207/74551/104215/12445/18795/20606/18709/11789/13640/77006/23921/18212/77889/18710/18128/17927/15461/56436/14678/19246/18754/70556/353342
GO:0009792	GO:0009792	embryo development ending in birth or egg hatching	386	0.217876	1.2116	0.0324516	0.292414	0.263302	434	tags=9%, list=6%, signal=9%	16392/15208/14812/12608/18845/22773/20733/16002/100678/12577/13388/14388/114873/13389/54352/15205/58250/17769/20289/20681/22339/16870/16007/56320/16911/74440/22209/14570/18230/16477/21380/22682/20135/53414
GO:0006109	GO:0006109	regulation of carbohydrate metabolic process	88	0.309652	1.40823	0.0334898	0.293504	0.264284	289	tags=8%, list=4%, signal=8%	56312/230784/14783/16002/20848/108682/15937
GO:0050727	GO:0050727	regulation of inflammatory response	100	0.303601	1.38524	0.0335789	0.293676	0.264439	331	tags=8%, list=4%, signal=8%	16392/56312/12608/11516/230899/66259/15937/100182
GO:0044346	GO:0044346	fibroblast apoptotic process	15	0.545755	1.7026	0.0340387	0.29698	0.267414	395	tags=20%, list=5%, signal=19%	56312/14456/11789
GO:0009954	GO:0009954	proximal/distal pattern formation	10	0.610292	1.66806	0.0341671	0.29698	0.267414	395	tags=30%, list=5%, signal=28%	15208/13388/11789
GO:0042594	GO:0042594	response to starvation	107	0.301479	1.3976	0.0341498	0.29698	0.267414	198	tags=9%, list=3%, signal=9%	230784/57875/100102/12575/14456/27053/13685/74551/12123/77976
GO:1903312	GO:1903312	negative regulation of mRNA metabolic process	41	0.411789	1.63143	0.0347028	0.300919	0.270961	1305	tags=32%, list=18%, signal=26%	140486/140488/12696/22339/59092/225027/15384/56717/13555/100041953/18148/12457/57317
GO:0019896	GO:0019896	axonal transport of mitochondrion	12	0.571796	1.61149	0.0347973	0.300919	0.270961	976	tags=33%, list=13%, signal=29%	67749/18039/22223/235180
GO:0021515	GO:0021515	cell differentiation in spinal cord	21	0.476702	1.60953	0.0350289	0.300919	0.270961	342	tags=19%, list=5%, signal=18%	16392/233552/16911/50913
GO:0071887	GO:0071887	leukocyte apoptotic process	44	-0.427504	-1.51056	0.0350631	0.300919	0.270961	956	tags=30%, list=13%, signal=26%	101540/320404/20440/102595/12369/19211/12505/17260/14634/30936/18761/16173/22418
GO:0010657	GO:0010657	muscle cell apoptotic process	53	0.358413	1.49083	0.0351179	0.300919	0.270961	513	tags=19%, list=7%, signal=18%	56312/16880/11516/20112/15368/11911/20656/26897/78688/319801
GO:1901888	GO:1901888	regulation of cell junction assembly	108	-0.348757	-1.43482	0.0350195	0.300919	0.270961	1396	tags=27%, list=19%, signal=22%	75409/226352/192197/71436/19271/399558/243725/244895/13837/13631/216560/73728/74762/18208/14609/19211/13643/13048/17260/320840/76965/18606/16180/18213/331461/13841/19249/22418/20194
GO:0044782	GO:0044782	cilium organization	189	-0.313128	-1.39643	0.0349398	0.300919	0.270961	2149	tags=40%, list=29%, signal=29%	380614/66910/229776/67590/76568/207425/74682/56350/71448/654470/52023/192176/16579/19893/71492/18541/67046/218232/78802/15185/72421/381644/57342/97064/80291/66573/277939/236266/52906/110350/16328/105000/18536/73668/74025/320634/67161/64009/209012/329795/52028/78795/81896/21821/67378/264134/217705/209586/216274/68259/83922/380718/213575/230872/234740/216560/71276/76260/382090/244585/67661/106633/2…
GO:0021535	GO:0021535	cell migration in hindbrain	16	0.515901	1.64734	0.035214	0.301133	0.271153	87	tags=19%, list=1%, signal=19%	270190/18845/18996
GO:0043207	GO:0043207	response to external biotic stimulus	368	-0.273305	-1.30613	0.0354767	0.302159	0.272077	1043	tags=16%, list=14%, signal=15%	26874/16363/235504/545370/192656/66824/20787/14824/53859/14455/235047/106869/80876/237868/68810/12633/22782/67248/67067/15979/56213/18129/70796/12369/19211/67486/384309/16172/18760/11810/56048/240354/100040462/19106/22038/17260/78781/235527/14734/320910/269855/11816/30936/16180/70097/225471/15064/56615/67664/237886/16159/319278/15122/16173/22418/217480/193740/15511/110257
GO:0051707	GO:0051707	response to other organism	368	-0.273305	-1.30613	0.0354767	0.302159	0.272077	1043	tags=16%, list=14%, signal=15%	26874/16363/235504/545370/192656/66824/20787/14824/53859/14455/235047/106869/80876/237868/68810/12633/22782/67248/67067/15979/56213/18129/70796/12369/19211/67486/384309/16172/18760/11810/56048/240354/100040462/19106/22038/17260/78781/235527/14734/320910/269855/11816/30936/16180/70097/225471/15064/56615/67664/237886/16159/319278/15122/16173/22418/217480/193740/15511/110257
GO:0050850	GO:0050850	positive regulation of calcium-mediated signaling	16	0.514621	1.64326	0.0356307	0.302861	0.272709	755	tags=31%, list=10%, signal=28%	16728/18013/30937/11486/15254
GO:0050771	GO:0050771	negative regulation of axonogenesis	31	-0.46886	-1.54185	0.0357654	0.303396	0.273192	1202	tags=39%, list=16%, signal=33%	240057/20349/213084/65079/18208/19211/13643/70433/20361/17751/13841/22418
GO:0007026	GO:0007026	negative regulation of microtubule depolymerization	23	0.484858	1.68319	0.0360251	0.30438	0.274077	1129	tags=43%, list=15%, signal=37%	260315/23805/20257/11789/17755/67254/68041/208158/16800/227634
GO:0003407	GO:0003407	neural retina development	39	0.38869	1.51795	0.0360167	0.30438	0.274077	656	tags=33%, list=9%, signal=31%	20848/20510/12677/66993/54352/15205/59058/20681/18212/19242/18128/18012/234267
GO:0007286	GO:0007286	spermatid development	53	-0.406631	-1.47755	0.0364865	0.307065	0.276495	1687	tags=36%, list=23%, signal=28%	66573/77031/236266/208908/237911/380773/60534/21821/67378/54137/264134/15512/16590/666173/18011/53422/67374/114642/20475
GO:0007610	GO:0007610	behavior	315	-0.281864	-1.32359	0.036488	0.307065	0.276495	1473	tags=29%, list=20%, signal=24%	77128/18536/208922/15376/18762/27103/75409/12257/73668/73094/11496/26431/269378/14169/74244/14815/240057/11669/224129/20512/18145/14009/74018/170719/209012/211612/14667/14466/12752/52028/52335/72194/58234/21916/260297/21821/67378/14824/20511/11488/19085/16590/17762/18441/15211/19165/242864/20528/15212/80297/20614/12298/74653/11941/12799/16476/14609/110893/104156/19211/23829/241950/13643/109294/11…
GO:0021983	GO:0021983	pituitary gland development	10	0.602273	1.64614	0.0365931	0.307339	0.276741	182	tags=20%, list=2%, signal=20%	16392/15205
GO:0002819	GO:0002819	regulation of adaptive immune response	47	-0.419477	-1.50499	0.0368349	0.308207	0.277523	1752	tags=34%, list=24%, signal=26%	16452/268564/381305/18762/27103/77777/75698/192656/66824/12505/240354/17260/18761/15064/16159/16173
GO:0032496	GO:0032496	response to lipopolysaccharide	75	-0.376642	-1.46172	0.0368421	0.308207	0.277523	342	tags=13%, list=5%, signal=13%	240354/19106/22038/17260/235527/70097/225471/56615/16159/16173
GO:0008585	GO:0008585	female gonad development	49	0.379359	1.55328	0.0371309	0.308911	0.278157	335	tags=12%, list=4%, signal=12%	56312/12608/11516/381677/22339/12841
GO:0022898	GO:0022898	regulation of transmembrane transporter activity	121	-0.340303	-1.42768	0.0371795	0.308911	0.278157	964	tags=23%, list=13%, signal=20%	58234/65973/260297/12856/15512/81904/69563/12298/14609/15168/19894/19211/74777/110784/11932/14167/432442/17260/12289/16497/11555/57816/13405/98660/18669/12296/72821/20266
GO:0032409	GO:0032409	regulation of transporter activity	127	-0.337029	-1.42109	0.0370844	0.308911	0.278157	964	tags=23%, list=13%, signal=20%	58234/65973/260297/12856/15512/81904/69563/12298/53881/14609/15168/19894/19211/74777/110784/11932/14167/432442/17260/12289/16497/11555/57816/13405/98660/18669/12296/72821/20266
GO:0008285	GO:0008285	negative regulation of cell population proliferation	269	0.233799	1.24645	0.0372182	0.308911	0.278157	248	tags=7%, list=3%, signal=7%	16392/56312/12608/270190/11516/58208/12575/16526/20733/20848/12577/13388/12677/15205/107503/240690/20112/15368/106014
GO:0060914	GO:0060914	heart formation	15	0.539334	1.68257	0.0372999	0.308983	0.278222	688	tags=40%, list=9%, signal=36%	16392/66993/15205/21380/18128/268902
GO:0003333	GO:0003333	amino acid transmembrane transport	37	0.398148	1.54147	0.0376512	0.311285	0.280294	711	tags=22%, list=10%, signal=20%	11989/21366/20510/17254/11987/55963/14057/214663
GO:1902074	GO:1902074	response to salt	122	0.281951	1.33521	0.037736	0.311378	0.280378	1146	tags=31%, list=15%, signal=27%	18164/54377/20510/18013/23934/15444/18039/80976/234214/18795/110834/18810/16477/13653/14281/23859/105675/14672/56506/13649/109305/14678/12314/11486/18754/12569/26557/22063/17748/57028/20191/56717/20983/171180/29876/18799/67860/12801
GO:0070102	GO:0070102	interleukin-6-mediated signaling pathway	10	0.599166	1.63765	0.0382105	0.312249	0.281163	201	tags=30%, list=3%, signal=29%	20848/14388/240690
GO:0002028	GO:0002028	regulation of sodium ion transport	50	-0.414234	-1.49899	0.0379919	0.312249	0.281163	276	tags=16%, list=4%, signal=16%	11932/14167/11555/57816/13405/98660/72821/20266
GO:0061512	GO:0061512	protein localization to cilium	43	-0.422775	-1.48498	0.0380818	0.312249	0.281163	2252	tags=53%, list=30%, signal=38%	320234/66910/74682/56350/654470/66573/93730/110350/64436/73668/52028/81896/264134/68259/230872/230500/16348/106633/213081/231214/319845/544696/51938
GO:0051963	GO:0051963	regulation of synapse assembly	67	-0.380165	-1.44071	0.0381579	0.312249	0.281163	765	tags=22%, list=10%, signal=20%	13631/73728/74762/18208/13643/13048/17260/320840/76965/16180/18213/331461/13841/19249/22418
GO:0048545	GO:0048545	response to steroid hormone	82	0.309382	1.38403	0.038153	0.312249	0.281163	507	tags=10%, list=7%, signal=9%	16392/67749/13685/74551/20606/77006/18212/77889
GO:0007031	GO:0007031	peroxisome organization	23	-0.506505	-1.56219	0.0384615	0.313188	0.282008	2876	tags=74%, list=39%, signal=46%	170789/11430/71382/18634/228607/58869/103737/66887/72759/74006/19299/56535/26874/19300/224824/27281/56794
GO:0002521	GO:0002521	leukocyte differentiation	218	0.239166	1.24689	0.0385088	0.313188	0.282008	889	tags=19%, list=12%, signal=17%	230126/12608/58208/102545/23882/14456/20848/18996/65963/22761/13388/66993/277360/18987/72147/72828/18795/22339/69656/16477/18030/11789/13653/14281/22042/67087/18102/16852/56436/22041/11486/18081/11740/17131/15976/23897/22417/20677/72057/18103/12611
GO:0030155	GO:0030155	regulation of cell adhesion	280	0.224952	1.22056	0.0385473	0.313188	0.282008	585	tags=15%, list=8%, signal=15%	13842/230126/12608/18845/16728/20733/16002/12721/13388/208936/16776/94212/114873/66993/277360/15205/17909/20713/77976/72828/13508/22339/18709/14115/16007/56320/100182/23790/13641/54371/11789/20358/13640/19158/22042/11987/225631/16423/21754/19242/16852/18128/228564
GO:0099172	GO:0099172	presynapse organization	31	-0.465093	-1.52947	0.0386266	0.313231	0.282047	666	tags=26%, list=9%, signal=24%	74762/26875/19211/13643/76965/16180/18213/331461
GO:0036003	GO:0036003	positive regulation of transcription from RNA polymerase II promoter in response to stress	11	0.599786	1.68703	0.0388094	0.314111	0.282839	476	tags=36%, list=6%, signal=34%	12608/22339/11911/11910
GO:0000165	GO:0000165	MAPK cascade	300	0.225952	1.23195	0.0389492	0.314642	0.283317	858	tags=18%, list=12%, signal=17%	13842/14812/14783/270190/11516/384009/23882/14456/230899/244923/16728/16002/76829/14388/71751/15901/22032/18795/22339/18709/16007/319520/21987/21380/11789/20358/29811/74178/19099/11910/18611/18212/77889/13649/18128/18053/15461/14678/20319/19246/22041/26399/240672/18754/242083/74769/66208/215449/22350/23988/15258/52033/20187/15502/16653
GO:0061098	GO:0061098	positive regulation of protein tyrosine kinase activity	13	0.588333	1.73487	0.0397458	0.316765	0.285229	805	tags=46%, list=11%, signal=41%	14456/16975/22248/19246/56013/19699
GO:0072348	GO:0072348	sulfur compound transport	15	0.535639	1.67104	0.0393381	0.316765	0.285229	209	tags=20%, list=3%, signal=19%	21366/20510/17254
GO:0046164	GO:0046164	alcohol catabolic process	13	-0.606522	-1.6092	0.0393701	0.316765	0.285229	991	tags=38%, list=13%, signal=33%	56050/114663/19211/17751/11816
GO:0046473	GO:0046473	phosphatidic acid metabolic process	10	-0.644302	-1.60325	0.039557	0.316765	0.285229	156	tags=40%, list=2%, signal=39%	104418/13139/105501/217480
GO:0046325	GO:0046325	negative regulation of glucose import	12	0.562682	1.58581	0.039798	0.316765	0.285229	501	tags=33%, list=7%, signal=31%	14783/104215/23921/18611
GO:0031112	GO:0031112	positive regulation of microtubule polymerization or depolymerization	22	-0.516887	-1.58578	0.0395894	0.316765	0.285229	14	tags=14%, list=0%, signal=14%	17762/193740/15511
GO:0019233	GO:0019233	sensory perception of pain	38	0.404745	1.56523	0.0398108	0.316765	0.285229	674	tags=26%, list=9%, signal=24%	14812/270190/11516/12297/12290/23859/17391/16592/18053/56461
GO:0042471	GO:0042471	ear morphogenesis	43	-0.434406	-1.52584	0.039654	0.316765	0.285229	768	tags=30%, list=10%, signal=27%	20682/216560/17828/67671/18208/14051/11941/12814/213081/12614/16206/18423/22418
GO:0044092	GO:0044092	negative regulation of molecular function	401	0.216132	1.20013	0.0400218	0.317847	0.286203	652	tags=13%, list=9%, signal=13%	56312/230126/57875/100102/29867/11516/12575/23882/14456/230899/20733/12577/231207/22761/15444/12297/15901/15205/20713/64209/15368/72828/66259/22339/217410/16870/66568/171580/23790/18810/11789/55927/19099/67087/19720/78688/105675/319801/21754/68040/20666/18128/11746/16885/17927/15461/68045/66849/14678/107392/20319/19246/12314
GO:0035282	GO:0035282	segmentation	43	0.406811	1.63492	0.0405931	0.319783	0.287947	166	tags=14%, list=2%, signal=14%	15208/18845/22773/13388/16776/13389
GO:0043368	GO:0043368	positive T cell selection	10	0.59459	1.62514	0.0406365	0.319783	0.287947	80	tags=20%, list=1%, signal=20%	58208/20848
GO:0060042	GO:0060042	retina morphogenesis in camera-type eye	37	0.395948	1.53296	0.0406433	0.319783	0.287947	564	tags=30%, list=8%, signal=28%	20848/20510/13388/12677/54352/59058/13508/20681/18212/19242/18128
GO:0060411	GO:0060411	cardiac septum morphogenesis	37	0.395611	1.53165	0.0406433	0.319783	0.287947	828	tags=27%, list=11%, signal=24%	16392/22761/15205/16007/21380/20666/18128/268902/17131/20677
GO:0010817	GO:0010817	regulation of hormone levels	212	0.238619	1.24504	0.040541	0.319783	0.287947	959	tags=21%, list=13%, signal=19%	16392/11516/230899/12903/16002/74551/381677/17932/16443/17254/20856/277978/66259/18795/20681/19339/68039/71764/12290/13653/13640/14672/20666/13649/54003/18012/16522/109305/18754/56455/11799/545156/19699/22417/22063/20677/20539/16573/12288/19084/215999/52055/228355/67151
GO:0043433	GO:0043433	negative regulation of DNA-binding transcription factor activity	80	0.326294	1.44465	0.0407743	0.320153	0.288279	1086	tags=21%, list=15%, signal=18%	56312/14456/15901/15205/15368/217410/66568/55927/67087/11746/107392/17131/12611/23938/54638/18036/13555
GO:0060271	GO:0060271	cilium assembly	179	-0.311797	-1.3734	0.0408416	0.320153	0.288279	2149	tags=39%, list=29%, signal=29%	380614/66910/229776/67590/76568/207425/74682/56350/71448/654470/52023/192176/19893/71492/18541/67046/218232/72421/381644/57342/97064/80291/66573/277939/236266/52906/110350/16328/105000/18536/73668/74025/320634/67161/64009/209012/329795/52028/78795/81896/21821/67378/264134/209586/216274/68259/83922/380718/213575/230872/234740/216560/71276/76260/382090/244585/67661/106633/213081/243371/18011/226251…
GO:0030073	GO:0030073	insulin secretion	120	0.282639	1.32969	0.0410216	0.320969	0.289015	1146	tags=26%, list=15%, signal=22%	16392/11516/74551/381677/17932/66259/18795/19339/71764/12290/13640/14672/18012/16522/109305/18754/56455/11799/22063/20677/16573/12288/19084/215999/52055/67151/67767/68267/66461/223527/12801
GO:0042249	GO:0042249	establishment of planar polarity of embryonic epithelium	11	-0.637953	-1.61409	0.0412698	0.322316	0.290227	302	tags=36%, list=4%, signal=35%	20377/12614/14238/22418
GO:0140236	GO:0140236	translation at presynapse	27	-0.48277	-1.53157	0.0414815	0.32316	0.290987	2222	tags=52%, list=30%, signal=37%	67186/27370/57808/54217/19982/68436/22186/19981/19941/66489/67671/67281/57294/54127
GO:0042472	GO:0042472	inner ear morphogenesis	36	-0.449667	-1.52949	0.0416069	0.32316	0.290987	768	tags=33%, list=10%, signal=30%	18424/11921/20682/216560/17828/18208/11941/12814/12614/16206/18423/22418
GO:0003073	GO:0003073	regulation of systemic arterial blood pressure	30	0.411003	1.50902	0.0415576	0.32316	0.290987	587	tags=30%, list=8%, signal=28%	14456/230899/52589/20112/78286/66259/15937/20656/74840
GO:0032652	GO:0032652	regulation of interleukin-1 production	32	0.431213	1.60423	0.0418393	0.32437	0.292077	401	tags=16%, list=5%, signal=15%	16392/14456/20848/16007/13653
GO:1901385	GO:1901385	regulation of voltage-gated calcium channel activity	18	0.512234	1.69558	0.0421697	0.325772	0.293339	153	tags=28%, list=2%, signal=27%	29867/237611/230899/15444/12297
GO:0001954	GO:0001954	positive regulation of cell-matrix adhesion	30	-0.471615	-1.53275	0.0422125	0.325772	0.293339	1568	tags=37%, list=21%, signal=29%	68606/18762/226352/19271/20130/58859/22288/16480/18606/13405/20194
GO:0035107	GO:0035107	appendage morphogenesis	71	-0.378928	-1.45268	0.042328	0.325772	0.293339	945	tags=31%, list=13%, signal=27%	65973/81896/21821/380718/234740/20682/19165/216560/98711/244585/106633/18129/14609/58198/213081/70300/11695/14634/544696/230857/14734/22418
GO:0035108	GO:0035108	limb morphogenesis	71	-0.378928	-1.45268	0.042328	0.325772	0.293339	945	tags=31%, list=13%, signal=27%	65973/81896/21821/380718/234740/20682/19165/216560/98711/244585/106633/18129/14609/58198/213081/70300/11695/14634/544696/230857/14734/22418
GO:0030178	GO:0030178	negative regulation of Wnt signaling pathway	78	0.315001	1.39719	0.0425296	0.326729	0.294201	659	tags=18%, list=9%, signal=17%	16392/14783/230899/23805/18230/629378/11789/13653/67087/27373/18128/93960/20319/328949
GO:0001736	GO:0001736	establishment of planar polarity	35	-0.453393	-1.53405	0.042735	0.32712	0.294553	1060	tags=29%, list=14%, signal=25%	20377/380718/216560/76260/244585/70300/12614/14734/14238/22418
GO:0007164	GO:0007164	establishment of tissue polarity	35	-0.453393	-1.53405	0.042735	0.32712	0.294553	1060	tags=29%, list=14%, signal=25%	20377/380718/216560/76260/244585/70300/12614/14734/14238/22418
GO:0010935	GO:0010935	regulation of macrophage cytokine production	11	-0.630771	-1.59592	0.0428571	0.32714	0.294571	1131	tags=45%, list=15%, signal=39%	21808/192656/66824/20361/22418
GO:1901215	GO:1901215	negative regulation of neuron death	137	0.270933	1.31499	0.0428922	0.32714	0.294571	858	tags=19%, list=12%, signal=17%	16392/12608/20848/18996/20510/12721/16443/18039/15368/22339/234734/11692/11911/20656/18212/319801/18053/15461/12048/11799/68815/66208/23988/17748/15258/16653
GO:0003197	GO:0003197	endocardial cushion development	14	0.52227	1.59568	0.043015	0.327486	0.294883	1	tags=7%, list=0%, signal=7%	16392
GO:0050848	GO:0050848	regulation of calcium-mediated signaling	32	0.429261	1.59696	0.0433608	0.328936	0.296188	960	tags=28%, list=13%, signal=25%	668940/16728/18013/30937/12314/11486/15254/26557/56717
GO:0070265	GO:0070265	necrotic cell death	38	0.402426	1.55626	0.0433608	0.328936	0.296188	9	tags=5%, list=0%, signal=5%	56312/21366
GO:0009219	GO:0009219	pyrimidine deoxyribonucleotide metabolic process	12	-0.610514	-1.60393	0.0435459	0.329749	0.29692	359	tags=25%, list=5%, signal=24%	22271/76654/99586
GO:0048738	GO:0048738	cardiac muscle tissue development	97	0.302023	1.38917	0.0439834	0.332467	0.299368	960	tags=23%, list=13%, signal=20%	16392/16526/22773/18996/22761/13388/234214/22339/20467/18810/11789/18128/17927/13052/17131/23988/216850/12301/19084/20191/56376/56717
GO:0032892	GO:0032892	positive regulation of organic acid transport	18	0.506558	1.67679	0.0447209	0.334138	0.300873	962	tags=33%, list=13%, signal=29%	14812/14077/26399/20539/17319/20983
GO:0021904	GO:0021904	dorsal/ventral neural tube patterning	23	-0.51796	-1.59752	0.0447034	0.334138	0.300873	2709	tags=70%, list=36%, signal=44%	19206/22158/319757/240888/74019/14633/654470/14451/15376/66743/81896/380718/19165/213081/14634/544696
GO:0031663	GO:0031663	lipopolysaccharide-mediated signaling pathway	21	-0.516454	-1.56082	0.0447094	0.334138	0.300873	342	tags=24%, list=5%, signal=23%	192656/240354/70097/225471/16173
GO:0001556	GO:0001556	oocyte maturation	17	0.47591	1.54703	0.0443441	0.334138	0.300873	731	tags=29%, list=10%, signal=27%	230126/20112/18795/12531/15078
GO:0048515	GO:0048515	spermatid differentiation	54	-0.396041	-1.44763	0.0447154	0.334138	0.300873	1687	tags=35%, list=23%, signal=27%	66573/77031/236266/208908/237911/380773/60534/21821/67378/54137/264134/15512/16590/666173/18011/53422/67374/114642/20475
GO:0032412	GO:0032412	regulation of monoatomic ion transmembrane transporter activity	115	-0.33885	-1.4083	0.044757	0.334138	0.300873	964	tags=30%, list=13%, signal=27%	50932/238161/20866/14467/14169/15275/12300/19057/58234/65973/260297/12856/15512/81904/69563/12298/15168/19894/19211/74777/110784/11932/14167/432442/17260/12289/16497/11555/57816/13405/98660/18669/12296/72821/20266
GO:0014706	GO:0014706	striated muscle tissue development	104	0.290696	1.34707	0.0447517	0.334138	0.300873	395	tags=11%, list=5%, signal=10%	16392/16526/22773/18996/22761/13388/234214/22339/20467/18810/11789
GO:0120254	GO:0120254	olefinic compound metabolic process	19	-0.531662	-1.56472	0.045045	0.334935	0.30159	1038	tags=32%, list=14%, signal=27%	19662/105014/98711/16531/66375/22139
GO:0009119	GO:0009119	ribonucleoside metabolic process	16	-0.553851	-1.55889	0.0451011	0.334935	0.30159	359	tags=25%, list=5%, signal=24%	22271/76654/224794/23959
GO:0000578	GO:0000578	embryonic axis specification	16	-0.5528	-1.55593	0.0451011	0.334935	0.30159	1840	tags=75%, list=25%, signal=57%	19206/327826/20460/22289/277939/218850/15376/226352/18424/16869/14296/22418
GO:0031100	GO:0031100	animal organ regeneration	13	0.576748	1.70071	0.0454729	0.335928	0.302484	554	tags=38%, list=7%, signal=36%	16880/12608/15368/11692/13649
GO:0061333	GO:0061333	renal tubule morphogenesis	32	0.427179	1.58922	0.0453893	0.335928	0.302484	620	tags=28%, list=8%, signal=26%	15208/18654/16776/15205/20681/22339/67087/107515/14160
GO:0014003	GO:0014003	oligodendrocyte development	21	0.461439	1.558	0.0454245	0.335928	0.302484	244	tags=19%, list=3%, signal=18%	15208/12805/77630/21367
GO:0045833	GO:0045833	negative regulation of lipid metabolic process	36	-0.445468	-1.51521	0.045911	0.338574	0.304867	3224	tags=75%, list=43%, signal=43%	105787/244373/26457/18590/19130/20655/18576/13167/66117/18033/11651/226144/227102/216190/108083/210992/52023/231070/75387/74244/100502698/20660/20682/320204/11810/11816/216505
GO:0002440	GO:0002440	production of molecular mediator of immune response	76	-0.367462	-1.43066	0.0459921	0.338582	0.304874	1477	tags=30%, list=20%, signal=25%	214763/11600/18762/108138/15275/19090/21808/75698/19662/14466/16431/192656/66824/16590/19165/20947/240354/20361/225471/15064/16159/16173/22418
GO:0055007	GO:0055007	cardiac muscle cell differentiation	55	0.365298	1.54058	0.046307	0.340308	0.306429	960	tags=22%, list=13%, signal=19%	16392/13388/234214/22339/18810/17927/13052/23988/216850/12301/56376/56717
GO:0060669	GO:0060669	embryonic placenta morphogenesis	13	0.573818	1.69207	0.0471115	0.341362	0.307377	305	tags=31%, list=4%, signal=30%	20733/16002/12577/16007
GO:0021694	GO:0021694	cerebellar Purkinje cell layer formation	12	-0.608691	-1.59914	0.0466563	0.341362	0.307377	1385	tags=58%, list=19%, signal=48%	19883/73668/14466/16869/11941/114142/57754
GO:0033559	GO:0033559	unsaturated fatty acid metabolic process	22	-0.507814	-1.55794	0.0469208	0.341362	0.307377	2029	tags=55%, list=27%, signal=40%	20249/14870/52023/20250/71519/26874/26378/14862/77219/67103/14726/19215
GO:0003206	GO:0003206	cardiac chamber morphogenesis	55	0.365042	1.5395	0.046855	0.341362	0.307377	828	tags=24%, list=11%, signal=21%	16392/18996/22761/66993/15205/16007/21380/20666/18128/20319/268902/17131/20677
GO:0035082	GO:0035082	axoneme assembly	26	-0.477139	-1.51236	0.0468521	0.341362	0.307377	1102	tags=35%, list=15%, signal=30%	209012/21821/67378/264134/243371/18011/231214/544696/51938
GO:0032760	GO:0032760	positive regulation of tumor necrosis factor production	30	0.408106	1.49838	0.0472568	0.341362	0.307377	305	tags=10%, list=4%, signal=10%	16392/20848/16007
GO:1903557	GO:1903557	positive regulation of tumor necrosis factor superfamily cytokine production	30	0.408106	1.49838	0.0472568	0.341362	0.307377	305	tags=10%, list=4%, signal=10%	16392/20848/16007
GO:0032640	GO:0032640	tumor necrosis factor production	50	0.358654	1.46702	0.0471404	0.341362	0.307377	508	tags=12%, list=7%, signal=11%	16392/14456/20848/16007/19720/16423
GO:0071706	GO:0071706	tumor necrosis factor superfamily cytokine production	50	0.358654	1.46702	0.0471404	0.341362	0.307377	508	tags=12%, list=7%, signal=11%	16392/14456/20848/16007/19720/16423
GO:0060485	GO:0060485	mesenchyme development	122	0.278339	1.3181	0.0470864	0.341362	0.307377	688	tags=18%, list=9%, signal=17%	16392/384009/22773/214968/16776/13389/15205/20289/20681/22339/100182/23790/13641/21380/629378/20358/67525/20666/18128/20319/353310/268902
GO:0044546	GO:0044546	NLRP3 inflammasome complex assembly	11	-0.627651	-1.58803	0.047619	0.342227	0.308156	955	tags=45%, list=13%, signal=40%	66824/59125/18760/75083/19106
GO:0140632	GO:0140632	inflammasome complex assembly	11	-0.627651	-1.58803	0.047619	0.342227	0.308156	955	tags=45%, list=13%, signal=40%	66824/59125/18760/75083/19106
GO:0050777	GO:0050777	negative regulation of immune response	39	0.368214	1.43799	0.0476023	0.342227	0.308156	1593	tags=38%, list=21%, signal=30%	11516/16002/15368/11692/19720/68350/17131/231712/110279/56468/70312/19172/11545/213541/17089
GO:0005979	GO:0005979	regulation of glycogen biosynthetic process	16	0.497072	1.58722	0.0481613	0.343789	0.309563	78	tags=12%, list=1%, signal=12%	14783/16002
GO:0010962	GO:0010962	regulation of glucan biosynthetic process	16	0.497072	1.58722	0.0481613	0.343789	0.309563	78	tags=12%, list=1%, signal=12%	14783/16002
GO:0006940	GO:0006940	regulation of smooth muscle contraction	19	-0.52447	-1.54355	0.048048	0.343789	0.309563	797	tags=32%, list=11%, signal=28%	16590/71544/16531/11555/54598/98660
GO:0032101	GO:0032101	regulation of response to external stimulus	328	0.218702	1.1905	0.0479477	0.343789	0.309563	331	tags=8%, list=4%, signal=8%	16392/56312/57738/12608/11516/12140/18654/14456/230899/57266/16002/214968/208936/12297/16975/72828/66259/13508/106014/22339/15937/11692/22249/56320/100182
GO:0060047	GO:0060047	heart contraction	86	0.291233	1.31582	0.048291	0.344135	0.309874	203	tags=8%, list=3%, signal=8%	16392/668940/230899/20510/16511/54352/20112
GO:0046112	GO:0046112	nucleobase biosynthetic process	14	0.517768	1.58192	0.0487501	0.344311	0.310032	1501	tags=57%, list=20%, signal=46%	108037/11821/11486/51797/56717/15452/56749/22247
GO:0098885	GO:0098885	modification of postsynaptic actin cytoskeleton	14	0.515383	1.57464	0.0495694	0.344311	0.310032	971	tags=36%, list=13%, signal=31%	29867/16443/108100/545156/12631
GO:0002824	GO:0002824	positive regulation of adaptive immune response based on somatic recombination of immune receptors built from immunoglobulin superfamily domains	32	-0.455792	-1.50969	0.049505	0.344311	0.310032	1752	tags=34%, list=24%, signal=26%	16452/268564/18762/77777/75698/192656/240354/18761/15064/16159/16173
GO:1901657	GO:1901657	glycosyl compound metabolic process	34	-0.448779	-1.50733	0.0495751	0.344311	0.310032	1718	tags=35%, list=23%, signal=27%	71891/232449/17766/269378/14466/26357/17939/22271/76654/224794/23959/99586
GO:0072091	GO:0072091	regulation of stem cell proliferation	34	-0.448128	-1.50515	0.0495751	0.344311	0.310032	987	tags=26%, list=13%, signal=23%	52335/20682/22341/19106/22601/14634/18505/18018/22418
GO:0072523	GO:0072523	purine-containing compound catabolic process	27	-0.474434	-1.50512	0.0488889	0.344311	0.310032	210	tags=26%, list=3%, signal=25%	237868/67725/18577/224794/23959/99586/18573
GO:0060972	GO:0060972	left/right pattern formation	58	-0.392533	-1.45313	0.0487145	0.344311	0.310032	1680	tags=41%, list=23%, signal=32%	277939/11477/52906/110350/226352/269878/74025/329795/81896/21821/216274/380718/213575/16348/244585/67661/106633/18129/14609/231214/17260/544696/51938/22418
GO:0072080	GO:0072080	nephron tubule development	39	0.363254	1.41862	0.0496172	0.344311	0.310032	564	tags=26%, list=8%, signal=24%	15208/18654/13388/16776/15205/20681/22339/67087/107515/18128
GO:1901136	GO:1901136	carbohydrate derivative catabolic process	64	-0.376154	-1.41663	0.0491368	0.344311	0.310032	759	tags=22%, list=10%, signal=20%	14667/14466/15211/15212/56174/12505/17939/22271/76654/18577/224794/23959/99586/18573
GO:0042060	GO:0042060	wound healing	122	-0.329655	-1.38111	0.0488432	0.344311	0.310032	840	tags=20%, list=11%, signal=18%	13713/67916/12633/18441/72461/18129/14609/12369/19211/12505/14369/14268/11747/19128/12614/22601/224794/11816/11555/18761/14726/22418/80748/20194
GO:1904019	GO:1904019	epithelial cell apoptotic process	58	0.325494	1.37755	0.0492054	0.344311	0.310032	1104	tags=29%, list=15%, signal=25%	56312/57875/14456/15901/15368/242705/11789/18012/12048/12122/20191/67151/56717/13555/12822/105504/51800
GO:0032102	GO:0032102	negative regulation of response to external stimulus	130	0.269069	1.29685	0.0495229	0.344311	0.310032	320	tags=9%, list=4%, signal=9%	16392/11516/12140/16002/214968/208936/12297/72828/106014/15937/11692/56320
GO:0043543	GO:0043543	protein acylation	135	0.265506	1.29033	0.0492947	0.344311	0.310032	6	tags=1%, list=0%, signal=2%	16392/56312
GO:0046649	GO:0046649	lymphocyte activation	263	0.223836	1.20342	0.0490251	0.344311	0.310032	549	tags=11%, list=7%, signal=11%	230126/12608/270190/58208/12575/102545/23882/14456/16002/20848/12721/13388/94212/66993/277360/15205/12445/18987/58194/13641/18030/11789/13653/22042/11987/19099/16423/16852/20666
GO:0046903	GO:0046903	secretion	415	0.207592	1.15957	0.0484237	0.344311	0.310032	1044	tags=21%, list=14%, signal=19%	16392/14812/11516/228942/230899/12721/74551/381677/17932/16443/14299/80976/12890/277978/15368/66259/29816/18795/19339/22339/110834/20969/22249/171580/68039/27883/71764/12290/13640/269951/11821/18102/18212/56513/14672/20666/53627/13649/279561/18128/54003/11981/18012/19349/12048/64051/16522/109305/14678/26399/11486/13446/242662/18754/11785/56455/11799/56013/545156/216363/215449/11419/22063/67826/20…
GO:0000122	GO:0000122	negative regulation of transcription by RNA polymerase II	434	0.203059	1.13676	0.0488771	0.344311	0.310032	564	tags=9%, list=8%, signal=9%	16392/15208/216848/12608/81703/230025/16002/18996/12795/12577/22761/12677/56370/15901/30937/15205/545474/240690/12445/72147/16978/12447/235050/20681/22339/16911/20467/50913/21380/18030/13653/55927/11911/11910/67087/19720/20672/17121/20666/238330/18128
GO:0007200	GO:0007200	phospholipase C-activating G protein-coupled receptor signaling pathway	16	-0.549682	-1.54716	0.0497667	0.344783	0.310458	967	tags=31%, list=13%, signal=27%	67168/78134/18441/16438/64337
GO:0045787	GO:0045787	positive regulation of cell cycle	167	0.247176	1.23999	0.0499909	0.34577	0.311347	260	tags=6%, list=3%, signal=6%	56312/230126/233552/27053/13685/16002/66993/15205/12445/18795
GO:0048713	GO:0048713	regulation of oligodendrocyte differentiation	23	0.467401	1.62259	0.0502695	0.34713	0.312571	564	tags=22%, list=8%, signal=20%	15208/15205/50913/19242/18128
GO:2001237	GO:2001237	negative regulation of extrinsic apoptotic signaling pathway	41	-0.432785	-1.50084	0.0506329	0.348503	0.313807	1114	tags=24%, list=15%, signal=21%	16410/216439/12633/170755/69660/14051/22601/21416/193740/15511
GO:0002822	GO:0002822	regulation of adaptive immune response based on somatic recombination of immune receptors built from immunoglobulin superfamily domains	41	-0.432725	-1.50063	0.0506329	0.348503	0.313807	342	tags=32%, list=5%, signal=30%	16452/268564/381305/18762/77777/75698/192656/240354/17260/18761/15064/16159/16173
GO:1904862	GO:1904862	inhibitory synapse assembly	11	0.589756	1.65882	0.0513281	0.350966	0.316025	127	tags=27%, list=2%, signal=27%	228942/14395/14406
GO:0043470	GO:0043470	regulation of carbohydrate catabolic process	34	0.405634	1.55337	0.0513011	0.350966	0.316025	1491	tags=35%, list=20%, signal=28%	56312/20848/15937/319801/56717/12492/16418/78830/19052/19045/22059/50721
GO:0042307	GO:0042307	positive regulation of protein import into nucleus	24	-0.483577	-1.50948	0.0511696	0.350966	0.316025	722	tags=29%, list=10%, signal=26%	29810/230500/68051/18760/16480/14634/18761
GO:0048872	GO:0048872	homeostasis of number of cells	167	-0.310773	-1.36026	0.0514429	0.350966	0.316025	1036	tags=16%, list=14%, signal=14%	14466/214133/14314/67155/21821/319653/320404/12633/16590/20682/242864/74443/13423/12505/109594/16909/241525/17260/14055/30936/140795/15122/16173/193740/15511/110257
GO:0008016	GO:0008016	regulation of heart contraction	72	0.311025	1.3588	0.0511976	0.350966	0.316025	173	tags=8%, list=2%, signal=8%	16392/668940/230899/20510/16511/54352
GO:2000113	GO:2000113	negative regulation of cellular macromolecule biosynthetic process	108	0.283143	1.31619	0.0514883	0.350966	0.316025	105	tags=5%, list=1%, signal=5%	140486/230784/14783/13685/231207
GO:0051646	GO:0051646	mitochondrion localization	34	0.405016	1.551	0.0523169	0.356041	0.320595	995	tags=32%, list=13%, signal=28%	67749/18039/64540/16467/17755/68350/56455/16573/22223/235180/74252
GO:0071222	GO:0071222	cellular response to lipopolysaccharide	52	-0.395868	-1.43816	0.052774	0.357428	0.321844	342	tags=15%, list=5%, signal=15%	240354/22038/17260/235527/70097/225471/16159/16173
GO:0071216	GO:0071216	cellular response to biotic stimulus	67	-0.370897	-1.40559	0.0526316	0.357428	0.321844	653	tags=16%, list=9%, signal=15%	56338/18129/240354/22038/17260/235527/70097/225471/16159/16173/22418
GO:0031668	GO:0031668	cellular response to extracellular stimulus	124	0.266331	1.2669	0.0527026	0.357428	0.321844	640	tags=14%, list=9%, signal=13%	230784/57875/100102/12575/109270/14456/27053/12123/77976/18810/14281/11911/22042/11910/17927/66734/20319
GO:0050714	GO:0050714	positive regulation of protein secretion	78	0.309243	1.37165	0.0533881	0.361009	0.325068	959	tags=27%, list=13%, signal=24%	16392/74551/66259/18795/22249/71764/56513/14672/13649/109305/18754/11785/56455/22063/20677/22350/16573/12288/19084/215999/67151
GO:1902369	GO:1902369	negative regulation of RNA catabolic process	35	0.393968	1.51036	0.0536239	0.362026	0.325984	266	tags=11%, list=4%, signal=11%	140486/140488/12696/22339
GO:0010803	GO:0010803	regulation of tumor necrosis factor-mediated signaling pathway	18	-0.533779	-1.54294	0.0539291	0.362409	0.326329	14	tags=17%, list=0%, signal=17%	66824/193740/15511
GO:0009953	GO:0009953	dorsal/ventral pattern formation	51	-0.394266	-1.43301	0.0539084	0.362409	0.326329	2420	tags=61%, list=33%, signal=41%	19206/22158/14632/319757/240888/74019/16974/380614/14633/21815/654470/14451/11477/110350/15376/73668/66743/18424/20377/16869/81896/21821/380718/19165/67661/213081/12006/70300/14634/544696/21892
GO:0007389	GO:0007389	pattern specification process	183	0.239911	1.22548	0.0539375	0.362409	0.326329	414	tags=10%, list=6%, signal=10%	16392/15208/18845/22773/13388/16776/66993/13389/23805/15245/15205/59058/16870/13641/21380/11789/13654/55927
GO:0140115	GO:0140115	export across plasma membrane	26	-0.471973	-1.49599	0.0541728	0.362838	0.326715	853	tags=38%, list=11%, signal=34%	54403/26357/22782/14609/110893/27416/17250/11932/98660/18669
GO:0010466	GO:0010466	negative regulation of peptidase activity	58	-0.389731	-1.44275	0.0541272	0.362838	0.326715	866	tags=24%, list=12%, signal=21%	20660/12633/75736/110595/12505/100040462/17035/12380/17751/14734/213945/20745/16426/15511
GO:0050772	GO:0050772	positive regulation of axonogenesis	58	0.322697	1.36571	0.054325	0.363283	0.327116	718	tags=26%, list=10%, signal=24%	18845/16728/18039/71751/13508/22339/56320/13640/13193/18212/17755/16885/14297/268902/11858
GO:0048147	GO:0048147	negative regulation of fibroblast proliferation	16	0.490508	1.56626	0.0548619	0.363997	0.327759	446	tags=12%, list=6%, signal=12%	56312/20656
GO:0009994	GO:0009994	oocyte differentiation	27	0.42267	1.53962	0.0547134	0.363997	0.327759	1585	tags=48%, list=21%, signal=38%	230126/20112/18795/14160/12531/15078/22417/13121/67141/12387/69716/213541/268697
GO:0030534	GO:0030534	adult behavior	83	-0.355366	-1.39746	0.0545213	0.363997	0.327759	1430	tags=35%, list=19%, signal=29%	15376/75409/11496/14169/74244/11669/18145/170719/209012/52028/58234/21916/67378/20511/17762/15211/80297/12298/12799/19211/13643/109294/16531/57754/14167/76965/18191/330222/98660
GO:0031669	GO:0031669	cellular response to nutrient levels	113	0.278526	1.30372	0.054856	0.363997	0.327759	198	tags=8%, list=3%, signal=8%	230784/57875/100102/12575/109270/14456/27053/12123/77976
GO:0002683	GO:0002683	negative regulation of immune system process	138	0.264255	1.28333	0.0548101	0.363997	0.327759	1036	tags=23%, list=14%, signal=20%	12608/11516/16002/65963/22761/13388/94212/239114/72147/15368/72828/18795/11692/74136/19720/107515/18102/16423/15526/20666/11486/68350/17131/22350/18103/19084/17319/231712/110279/245860/15354/12400
GO:0034220	GO:0034220	monoatomic ion transmembrane transport	302	-0.276733	-1.29357	0.0550459	0.364647	0.328344	964	tags=20%, list=13%, signal=18%	58234/100604/65973/12856/15512/226139/20511/110862/54403/14802/320091/81904/19165/103098/16498/69563/22782/211468/98741/12298/16438/11941/110893/15168/13483/19211/27416/226025/74777/18760/110784/74051/16531/72392/53623/11932/14403/110876/14167/432442/12289/16439/66237/57138/16497/11555/72961/57816/13405/170738/14813/14399/14394/98660/238271/226781/18669/18823/12296/72821/20266
GO:0090288	GO:0090288	negative regulation of cellular response to growth factor stimulus	33	-0.447145	-1.49515	0.0553191	0.365884	0.329458	1060	tags=27%, list=14%, signal=23%	20377/20660/12633/68010/56213/70300/21416/16159/22418
GO:0009264	GO:0009264	deoxyribonucleotide catabolic process	11	-0.614595	-1.55499	0.0555556	0.366303	0.329835	359	tags=27%, list=5%, signal=26%	22271/76654/99586
GO:0043542	GO:0043542	endothelial cell migration	77	-0.359092	-1.39977	0.0554822	0.366303	0.329835	1653	tags=34%, list=22%, signal=27%	18024/19876/79221/23797/11600/192197/20130/12767/16410/27494/12752/14314/101540/14824/67916/72461/22341/19211/18760/56048/16480/17260/11816/70097/13846/22418
GO:0007628	GO:0007628	adult walking behavior	22	-0.497526	-1.52638	0.0557185	0.366806	0.330288	1257	tags=45%, list=17%, signal=38%	74244/18145/170719/17762/15211/80297/12298/13643/16531/57754
GO:0048806	GO:0048806	genitalia development	16	-0.540699	-1.52187	0.0559876	0.368005	0.331368	1038	tags=31%, list=14%, signal=27%	19662/16869/21416/14238/22418
GO:0071392	GO:0071392	cellular response to estradiol stimulus	11	0.583751	1.64193	0.0561779	0.368684	0.331979	658	tags=45%, list=9%, signal=41%	18996/20606/13649/17927/353310
GO:0032680	GO:0032680	regulation of tumor necrosis factor production	47	0.37493	1.53798	0.0564502	0.368756	0.332044	508	tags=13%, list=7%, signal=12%	16392/14456/20848/16007/19720/16423
GO:1903555	GO:1903555	regulation of tumor necrosis factor superfamily cytokine production	47	0.37493	1.53798	0.0564502	0.368756	0.332044	508	tags=13%, list=7%, signal=12%	16392/14456/20848/16007/19720/16423
GO:0002761	GO:0002761	regulation of myeloid leukocyte differentiation	48	0.365415	1.50318	0.056312	0.368756	0.332044	960	tags=27%, list=13%, signal=24%	12608/18996/22761/72147/72828/11789/14281/67087/18102/18081/23897/18103/56717
GO:0061077	GO:0061077	chaperone-mediated protein folding	32	-0.452251	-1.49796	0.0565771	0.369015	0.332277	14	tags=22%, list=0%, signal=22%	56323/56812/67035/70604/15512/193740/15511
GO:1901222	GO:1901222	regulation of NIK/NF-kappaB signaling	33	-0.446597	-1.49331	0.0567376	0.369493	0.332707	358	tags=15%, list=5%, signal=14%	110784/19106/70097/171211/16173
GO:0002183	GO:0002183	cytoplasmic translational initiation	19	0.499819	1.65741	0.0568275	0.36951	0.332723	1749	tags=58%, list=23%, signal=44%	13685/66405/20492/433702/68995/217869/55944/13669/213541/218629/67204
GO:0002369	GO:0002369	T cell cytokine production	10	-0.621489	-1.54649	0.056962	0.369816	0.332999	342	tags=50%, list=5%, signal=48%	18762/14466/240354/16159/16173
GO:0051123	GO:0051123	RNA polymerase II preinitiation complex assembly	33	0.392577	1.47259	0.0572028	0.370244	0.333384	2914	tags=76%, list=39%, signal=46%	99730/20933/80509/192191/235459/67224/68705/22059/28077/13486/229906/24075/226182/69792/67089/67279/108098/319944/381379/225895/68776/21343/21833/67219/15289
GO:0051338	GO:0051338	regulation of transferase activity	385	0.209032	1.16016	0.0571169	0.370244	0.333384	960	tags=18%, list=13%, signal=17%	13842/230784/230126/11516/12575/23882/14456/22359/230899/16002/12577/20510/12427/14388/16975/71751/12445/72828/66259/22032/12447/22339/18709/217410/110834/16007/16911/23790/18810/22248/66412/21987/11789/13653/19099/19720/18212/319801/21754/18710/13649/16885/15461/68045/20319/19246/12531/26399/70369/16898/12569/56013/74769/17131/19087/19699/18767/67468/23988/20187/15502/16653/22196/23938/19084/641…
GO:0015807	GO:0015807	L-amino acid transport	27	0.418312	1.52375	0.057472	0.370852	0.333932	831	tags=30%, list=11%, signal=26%	11989/20510/17254/11987/55963/14057/214663/20539
GO:0001667	GO:0001667	ameboidal-type cell migration	179	0.241915	1.22777	0.0574524	0.370852	0.333932	588	tags=14%, list=8%, signal=13%	16392/384009/16002/214968/12721/16776/15368/114886/20681/22339/18709/23790/18810/13641/245827/21380/22682/11789/332397/20358/21754/18710/232227/18128/56332
GO:0140241	GO:0140241	translation at synapse	28	-0.469303	-1.50024	0.0580357	0.373064	0.335923	2222	tags=50%, list=30%, signal=35%	67186/27370/57808/54217/19982/68436/22186/19981/19941/66489/67671/67281/57294/54127
GO:0140242	GO:0140242	translation at postsynapse	28	-0.469303	-1.50024	0.0580357	0.373064	0.335923	2222	tags=50%, list=30%, signal=35%	67186/27370/57808/54217/19982/68436/22186/19981/19941/66489/67671/67281/57294/54127
GO:0034763	GO:0034763	negative regulation of transmembrane transport	65	0.323099	1.39091	0.0580792	0.373064	0.335923	713	tags=18%, list=10%, signal=17%	14783/100102/29867/16511/12297/104215/23921/18611/105675/16592/12314/18754
GO:0048566	GO:0048566	embryonic digestive tract development	13	-0.581815	-1.54365	0.0582677	0.373708	0.336503	465	tags=31%, list=6%, signal=29%	58198/14634/21416/14238
GO:0021681	GO:0021681	cerebellar granular layer development	10	-0.618896	-1.54003	0.0585443	0.373888	0.336665	561	tags=80%, list=8%, signal=74%	19130/12404/14804/17242/94190/11941/57754/76484
GO:0033028	GO:0033028	myeloid cell apoptotic process	19	-0.517108	-1.52188	0.0585586	0.373888	0.336665	858	tags=37%, list=12%, signal=33%	320404/20440/102595/19211/12505/17260/16173
GO:0043434	GO:0043434	response to peptide hormone	188	0.243547	1.23789	0.0585608	0.373888	0.336665	641	tags=12%, list=9%, signal=11%	230784/14783/67749/100102/13685/16002/20848/231207/74551/381677/104215/12445/18795/18709/11789/13653/13654/23921/18710/15461/56436/14678/19246
GO:0030514	GO:0030514	negative regulation of BMP signaling pathway	16	-0.535486	-1.5072	0.059098	0.373934	0.336706	1060	tags=38%, list=14%, signal=32%	20377/20660/68010/56213/21416/22418
GO:0043574	GO:0043574	peroxisomal transport	16	-0.532389	-1.49848	0.059098	0.373934	0.336706	2518	tags=69%, list=34%, signal=46%	71382/18634/58869/103737/66887/19299/56535/26874/19300/224824/56794
GO:0002705	GO:0002705	positive regulation of leukocyte mediated immunity	36	-0.434491	-1.47787	0.0588235	0.373934	0.336706	1132	tags=22%, list=15%, signal=19%	77777/75698/16590/240354/225471/15064/16159/16173
GO:0007368	GO:0007368	determination of left/right symmetry	55	-0.384985	-1.40632	0.0589849	0.373934	0.336706	1680	tags=40%, list=23%, signal=31%	277939/11477/52906/110350/269878/74025/329795/21821/216274/380718/213575/16348/244585/67661/106633/18129/14609/231214/17260/544696/51938/22418
GO:0006631	GO:0006631	fatty acid metabolic process	147	-0.314096	-1.35792	0.0589711	0.373934	0.336706	2274	tags=44%, list=31%, signal=31%	18634/53322/15488/216190/66887/11992/60525/16367/109672/20249/14870/18984/52023/231070/50790/257633/20250/70757/16956/71519/107476/17850/20397/12908/13666/74159/75387/66885/75778/171210/52430/19299/384783/18023/56357/16889/11364/78070/15107/64898/26874/19300/113868/74114/20787/51798/26378/20682/67885/12896/14862/16890/231326/77219/18604/320204/52665/72852/56794/67103/71147/14726/19215/18823
GO:0009267	GO:0009267	cellular response to starvation	95	0.282551	1.28759	0.0588672	0.373934	0.336706	198	tags=8%, list=3%, signal=8%	230784/57875/100102/12575/14456/27053/12123/77976
GO:0001959	GO:0001959	regulation of cytokine-mediated signaling pathway	49	-0.400315	-1.44318	0.0592287	0.374201	0.336947	150	tags=10%, list=2%, signal=10%	384309/225471/22418/193740/15511
GO:2000679	GO:2000679	positive regulation of transcription regulatory region DNA binding	11	0.578169	1.62623	0.0594111	0.374237	0.336979	1447	tags=45%, list=19%, signal=37%	18996/77006/18012/11545/12387
GO:0030518	GO:0030518	intracellular steroid hormone receptor signaling pathway	45	0.376584	1.52403	0.0593898	0.374237	0.336979	865	tags=16%, list=12%, signal=14%	16392/77006/18212/77889/353342/15502/12317
GO:0009895	GO:0009895	negative regulation of catabolic process	164	0.24554	1.236	0.0596312	0.375065	0.337725	289	tags=7%, list=4%, signal=7%	140486/56312/20848/225020/140488/15368/12696/104009/211134/17025/22339/15937
GO:0006885	GO:0006885	regulation of pH	41	-0.42038	-1.45782	0.0604782	0.379828	0.342014	1062	tags=37%, list=14%, signal=32%	76524/19063/240283/77031/20615/12752/14824/54403/433375/20535/18604/72392/270160/57138/12351
GO:1903131	GO:1903131	mononuclear cell differentiation	162	0.246024	1.22754	0.060778	0.381145	0.3432	401	tags=11%, list=5%, signal=11%	230126/12608/58208/102545/23882/14456/20848/65963/13388/66993/277360/18987/72147/22339/69656/18030/11789/13653
GO:0072337	GO:0072337	modified amino acid transport	13	0.55819	1.64598	0.0610398	0.382221	0.344169	978	tags=38%, list=13%, signal=33%	11989/11987/55963/214663/57279
GO:0032731	GO:0032731	positive regulation of interleukin-1 beta production	19	0.490367	1.62606	0.061302	0.382886	0.344767	401	tags=21%, list=5%, signal=20%	16392/20848/16007/13653
GO:0007606	GO:0007606	sensory perception of chemical stimulus	14	-0.567551	-1.54088	0.0614173	0.382886	0.344767	210	tags=29%, list=3%, signal=28%	52028/76260/18577/64337
GO:0007229	GO:0007229	integrin-mediated signaling pathway	24	-0.47636	-1.48695	0.0614035	0.382886	0.344767	1114	tags=33%, list=15%, signal=28%	16410/100169/67916/16401/14268/20361/320910/16773
GO:0006839	GO:0006839	mitochondrial transport	87	0.29504	1.34679	0.0616209	0.38359	0.345402	978	tags=24%, list=13%, signal=21%	67749/72930/18164/20848/29816/15937/15277/30058/78688/105675/73689/12048/68350/11740/12122/231430/16573/53600/66525/381038/57279
GO:0043270	GO:0043270	positive regulation of monoatomic ion transport	102	-0.338045	-1.38003	0.0620957	0.385978	0.347552	1543	tags=32%, list=21%, signal=26%	11517/246198/23797/238161/24012/20866/12257/14467/14169/12300/22393/12767/19057/58234/65973/12856/15512/18441/12298/16438/11941/13483/11932/14167/432442/12289/11555/57816/13405/18669/18823/12296/20266
GO:0055001	GO:0055001	muscle cell development	80	0.310154	1.37319	0.0622341	0.386271	0.347815	337	tags=11%, list=5%, signal=11%	16392/237611/15205/234214/22339/68794/227325/13007/18810
GO:0001662	GO:0001662	behavioral fear response	20	0.445788	1.49067	0.0624166	0.386271	0.347816	104	tags=20%, list=1%, signal=20%	14812/11516/20510/18013
GO:0002209	GO:0002209	behavioral defense response	20	0.445788	1.49067	0.0624166	0.386271	0.347816	104	tags=20%, list=1%, signal=20%	14812/11516/20510/18013
GO:0001952	GO:0001952	regulation of cell-matrix adhesion	56	-0.384572	-1.40952	0.062585	0.386748	0.348245	1420	tags=30%, list=19%, signal=25%	50932/18762/226352/192197/19271/20130/20349/244895/58859/13837/216560/22288/19211/16480/18606/13405/20194
GO:0055075	GO:0055075	potassium ion homeostasis	14	-0.564296	-1.53204	0.0629921	0.388696	0.349999	358	tags=36%, list=5%, signal=34%	110784/16531/11932/57138/98660
GO:0050803	GO:0050803	regulation of synapse structure or activity	158	-0.307996	-1.33802	0.0631313	0.388988	0.350262	1079	tags=23%, list=14%, signal=20%	399558/50791/243725/12752/58234/103967/227580/13631/19165/73728/74762/18208/30785/12323/72289/104156/19211/140919/23829/18011/108672/13643/13048/56508/53321/17260/320840/76965/11816/16180/72961/18213/331461/13841/19249/22418/217480
GO:0032612	GO:0032612	interleukin-1 production	34	0.39634	1.51778	0.0634911	0.390634	0.351744	401	tags=15%, list=5%, signal=14%	16392/14456/20848/16007/13653
GO:0007163	GO:0007163	establishment or maintenance of cell polarity	124	0.262577	1.24904	0.063583	0.390634	0.351744	607	tags=13%, list=8%, signal=12%	15208/270190/170736/20733/104215/15205/16870/72080/11789/17826/69581/93737/17755/56513/56332/232288
GO:0060759	GO:0060759	regulation of response to cytokine stimulus	50	-0.394402	-1.42723	0.063772	0.391228	0.352279	150	tags=10%, list=2%, signal=10%	384309/225471/22418/193740/15511
GO:0060711	GO:0060711	labyrinthine layer development	20	0.442719	1.48041	0.064239	0.39346	0.354289	358	tags=25%, list=5%, signal=24%	20733/14388/15205/16007/16477
GO:0043254	GO:0043254	regulation of protein-containing complex assembly	202	0.242096	1.23187	0.0643218	0.39346	0.354289	602	tags=14%, list=8%, signal=13%	16392/13685/12721/72042/12123/260315/277360/15205/29816/19339/22339/18709/80880/22249/56320/16911/20257/11789/65112/22042/67087/78688/17755/20742/19241/22323/108100/53626
GO:1901615	GO:1901615	organic hydroxy compound metabolic process	182	-0.299846	-1.32383	0.0644362	0.393591	0.354406	1316	tags=25%, list=18%, signal=21%	19299/18023/81535/16889/11669/18145/19286/21808/68177/19662/14466/233011/56050/73822/24136/113868/20787/320404/67916/16590/105014/18441/98711/242864/53881/50784/327655/11941/16890/29807/114663/19211/72562/20502/16531/66375/68563/17751/11816/105501/104069/65970/433323/22418/22139
GO:0009081	GO:0009081	branched-chain amino acid metabolic process	17	-0.518859	-1.47967	0.0650155	0.39571	0.356315	2154	tags=71%, list=29%, signal=50%	11992/227095/66948/12039/12040/58875/12036/66885/56357/78038/13171/104776
GO:0009083	GO:0009083	branched-chain amino acid catabolic process	17	-0.518859	-1.47967	0.0650155	0.39571	0.356315	2154	tags=71%, list=29%, signal=50%	11992/227095/66948/12039/12040/58875/12036/66885/56357/78038/13171/104776
GO:0048525	GO:0048525	negative regulation of viral process	32	-0.446058	-1.47745	0.0650636	0.39571	0.356315	841	tags=34%, list=11%, signal=31%	80750/218850/98999/235047/80876/384309/100040462/19106/22038/78781/319278
GO:0001568	GO:0001568	blood vessel development	270	0.221136	1.18002	0.0654536	0.397511	0.357936	588	tags=13%, list=8%, signal=12%	16392/230126/57875/270190/18654/16002/20848/20510/13388/14388/15901/15245/15205/15368/106014/22339/18709/15277/16007/242705/16477/21380/13653/13654/20358/83921/353156/18212/20672/19242/18710/18128/18053/56332
GO:0010717	GO:0010717	regulation of epithelial to mesenchymal transition	41	0.385218	1.52616	0.0656153	0.397922	0.358306	658	tags=20%, list=9%, signal=18%	16392/384009/22339/629378/67525/18128/20319/353310
GO:0042743	GO:0042743	hydrogen peroxide metabolic process	22	-0.488689	-1.49927	0.0659824	0.399487	0.359716	214	tags=14%, list=3%, signal=13%	17751/15122/101488143
GO:0045088	GO:0045088	regulation of innate immune response	105	-0.334669	-1.37082	0.0660622	0.399487	0.359716	457	tags=12%, list=6%, signal=12%	67486/384309/100040462/22038/78781/11816/30936/225471/67664/16159/22418/193740/15511
GO:0008630	GO:0008630	intrinsic apoptotic signaling pathway in response to DNA damage	54	0.333196	1.38778	0.0666311	0.402353	0.362296	1104	tags=26%, list=15%, signal=22%	56312/12575/15368/15937/68048/20656/12048/12122/15258/17319/22070/12581/13555/51800
GO:0003013	GO:0003013	circulatory system process	186	0.239395	1.20807	0.0668191	0.402913	0.362801	672	tags=16%, list=9%, signal=15%	16392/668940/11516/14456/230899/20510/13388/16511/52589/54352/20112/78286/15368/66259/22339/15937/18810/12290/20656/67087/70729/14672/13649/333433/74840/14678/12314/26399/11486
GO:0072332	GO:0072332	intrinsic apoptotic signaling pathway by p53 class mediator	44	0.365564	1.47069	0.0671098	0.403007	0.362885	1184	tags=30%, list=16%, signal=25%	56312/12575/18996/242705/21981/68048/241494/15254/15258/17319/13555/51800/54673
GO:0043401	GO:0043401	steroid hormone mediated signaling pathway	49	0.349895	1.43264	0.0670024	0.403007	0.362885	865	tags=14%, list=12%, signal=13%	16392/77006/18212/77889/353342/15502/12317
GO:0042303	GO:0042303	molting cycle	55	-0.380865	-1.39127	0.0672154	0.403007	0.362885	1131	tags=25%, list=15%, signal=22%	21808/227377/73822/20682/19165/15220/83925/70300/11695/12614/16206/18018/171211/22418
GO:0042633	GO:0042633	hair cycle	55	-0.380865	-1.39127	0.0672154	0.403007	0.362885	1131	tags=25%, list=15%, signal=22%	21808/227377/73822/20682/19165/15220/83925/70300/11695/12614/16206/18018/171211/22418
GO:0051654	GO:0051654	establishment of mitochondrion localization	22	0.475918	1.62385	0.0681257	0.407311	0.366761	976	tags=36%, list=13%, signal=32%	67749/18039/64540/17755/56455/16573/22223/235180
GO:0007616	GO:0007616	long-term memory	23	-0.480171	-1.48097	0.0680473	0.407311	0.366761	1858	tags=52%, list=25%, signal=39%	16835/98388/208922/18762/27103/211612/20528/20614/12326/11816/72961/12307
GO:0070050	GO:0070050	neuron cellular homeostasis	36	-0.423225	-1.43955	0.0688666	0.41116	0.370226	763	tags=22%, list=10%, signal=20%	18441/19165/15212/11941/72392/66237/72961/12307
GO:0060039	GO:0060039	pericardium development	13	-0.573827	-1.52245	0.0692913	0.413113	0.371985	697	tags=38%, list=9%, signal=35%	71436/16401/244585/14726/22418
GO:0036303	GO:0036303	lymph vessel morphogenesis	10	-0.609172	-1.51584	0.0696203	0.41449	0.373225	541	tags=40%, list=7%, signal=37%	22341/56048/14726/18018
GO:0042491	GO:0042491	inner ear auditory receptor cell differentiation	22	0.47474	1.61984	0.070005	0.415169	0.373837	182	tags=14%, list=2%, signal=13%	15208/13388/15205
GO:0022038	GO:0022038	corpus callosum development	17	0.462679	1.50402	0.0702247	0.415169	0.373837	332	tags=24%, list=4%, signal=23%	16565/77630/59058/23790
GO:0045494	GO:0045494	photoreceptor cell maintenance	16	-0.522583	-1.47088	0.0699844	0.415169	0.373837	1234	tags=50%, list=17%, signal=42%	74025/52028/67378/216274/230872/241950/11932/110789
GO:1904062	GO:1904062	regulation of monoatomic cation transmembrane transport	143	-0.308717	-1.32638	0.0700637	0.415169	0.373837	754	tags=26%, list=10%, signal=24%	238161/24012/20866/14467/14169/20530/19057/21808/13057/65973/12856/15512/19165/16498/69563/22782/12298/15168/13483/19211/74777/18760/110784/11932/14167/432442/12289/16497/11555/57816/13405/14813/98660/18823/12296/72821/20266
GO:0006469	GO:0006469	negative regulation of protein kinase activity	100	0.281078	1.28247	0.0701622	0.415169	0.373837	1033	tags=25%, list=14%, signal=22%	230126/12575/23882/230899/12577/72828/66259/23790/18810/11789/19099/19720/21754/68045/20319/19246/56013/74769/19087/18767/15502/19084/22223/110532/22088
GO:0002685	GO:0002685	regulation of leukocyte migration	62	0.320381	1.37505	0.0704382	0.41585	0.37445	955	tags=27%, list=13%, signal=24%	18654/14456/20868/57266/12721/18795/22339/216892/54371/16423/19242/11486/18081/12317/215999/17319/110279
GO:0002089	GO:0002089	lens morphogenesis in camera-type eye	13	0.525627	1.54996	0.0708447	0.417668	0.376087	846	tags=38%, list=11%, signal=34%	18742/58235/11911/20666/15258
GO:0071496	GO:0071496	cellular response to external stimulus	137	0.257181	1.24825	0.0710358	0.418212	0.376577	476	tags=12%, list=6%, signal=11%	230784/57875/100102/12575/109270/14456/27053/12123/77976/20289/18810/231503/14281/11911/22042/11910
GO:0046328	GO:0046328	regulation of JNK cascade	60	0.324092	1.37564	0.0713411	0.419215	0.377479	640	tags=18%, list=9%, signal=17%	270190/23882/230899/244923/22032/18795/21987/19099/13649/15461/20319
GO:0001775	GO:0001775	cell activation	346	0.210235	1.15688	0.0714042	0.419215	0.377479	554	tags=12%, list=7%, signal=12%	230126/12608/270190/58208/12575/102545/23882/14456/230899/16002/20848/12721/13388/208936/94212/66993/277360/15205/12890/12445/18987/72147/15368/72828/114886/58194/18795/16911/13641/18030/11789/13653/22042/11987/19099/57914/16423/22022/16852/20666/13649
GO:0002831	GO:0002831	regulation of response to biotic stimulus	140	-0.31188	-1.33518	0.0716113	0.419268	0.377527	498	tags=13%, list=7%, signal=12%	56213/70796/19211/67486/384309/100040462/22038/78781/11816/30936/70097/225471/15064/67664/16159/22418/193740/15511
GO:0042326	GO:0042326	negative regulation of phosphorylation	194	0.241091	1.22198	0.0715715	0.419268	0.377527	855	tags=18%, list=11%, signal=16%	56312/230126/14783/12575/23882/230899/244923/20848/12577/72828/66259/15937/171580/23790/18810/11789/65112/19099/19720/319801/21754/56513/333433/53626/68045/20319/19246/56455/56013/74769/17131/19087/18767/52033/15502
GO:0003002	GO:0003002	regionalization	168	0.242184	1.2156	0.0719126	0.42045	0.378592	414	tags=10%, list=6%, signal=9%	16392/15208/18845/22773/13388/16776/66993/13389/15245/15205/59058/16870/21380/11789/13654/55927
GO:0090314	GO:0090314	positive regulation of protein targeting to membrane	12	0.538283	1.51704	0.0724234	0.422853	0.380755	730	tags=33%, list=10%, signal=30%	15444/12297/15461/12569
GO:0060993	GO:0060993	kidney morphogenesis	35	0.380662	1.45935	0.0726674	0.42311	0.380987	487	tags=23%, list=7%, signal=21%	15208/18654/16776/15205/20681/22339/67087/107515
GO:0007611	GO:0007611	learning or memory	135	-0.311155	-1.32521	0.0726115	0.42311	0.380987	1085	tags=23%, list=15%, signal=20%	211612/14667/12752/52335/58234/260297/19085/16590/17762/19165/20528/20614/74653/16476/110893/19211/23829/114142/13048/12326/110876/17260/18191/11816/57138/16497/11555/72961/98660/268934/12307
GO:0007274	GO:0007274	neuromuscular synaptic transmission	10	0.577926	1.5796	0.072973	0.423724	0.381539	293	tags=30%, list=4%, signal=29%	237611/19339/110834
GO:2000209	GO:2000209	regulation of anoikis	10	0.574536	1.57033	0.072973	0.423724	0.381539	637	tags=40%, list=9%, signal=37%	18212/18128/12048/107392
GO:0009612	GO:0009612	response to mechanical stimulus	50	-0.382235	-1.3832	0.07327	0.424866	0.382568	1179	tags=34%, list=16%, signal=29%	20512/14009/12767/58234/16590/20682/18441/29810/11941/16476/12814/114142/16480/13405/110789/98660/16173
GO:0006509	GO:0006509	membrane protein ectodomain proteolysis	19	-0.505372	-1.48735	0.0735736	0.42488	0.38258	1788	tags=42%, list=24%, signal=32%	73218/66616/269473/19165/110595/27059/11816/18761
GO:0010563	GO:0010563	negative regulation of phosphorus metabolic process	214	0.233669	1.22082	0.0734836	0.42488	0.38258	855	tags=17%, list=11%, signal=16%	56312/230126/14783/12575/23882/230899/244923/20848/12577/15444/72828/66259/15937/171580/23790/18810/11789/65112/19099/19720/319801/21754/56513/333433/53626/68045/14678/20319/19246/56455/56013/74769/17131/19087/18767/52033/15502
GO:0045936	GO:0045936	negative regulation of phosphate metabolic process	214	0.233669	1.22082	0.0734836	0.42488	0.38258	855	tags=17%, list=11%, signal=16%	56312/230126/14783/12575/23882/230899/244923/20848/12577/15444/72828/66259/15937/171580/23790/18810/11789/65112/19099/19720/319801/21754/56513/333433/53626/68045/14678/20319/19246/56455/56013/74769/17131/19087/18767/52033/15502
GO:0030509	GO:0030509	BMP signaling pathway	46	0.361469	1.47383	0.0743472	0.427017	0.384505	847	tags=33%, list=11%, signal=29%	15208/15901/15205/94187/20289/16007/13653/20666/18128/68431/20319/225743/17131/15258/50766
GO:0071772	GO:0071772	response to BMP	46	0.361469	1.47383	0.0743472	0.427017	0.384505	847	tags=33%, list=11%, signal=29%	15208/15901/15205/94187/20289/16007/13653/20666/18128/68431/20319/225743/17131/15258/50766
GO:0071773	GO:0071773	cellular response to BMP stimulus	46	0.361469	1.47383	0.0743472	0.427017	0.384505	847	tags=33%, list=11%, signal=29%	15208/15901/15205/94187/20289/16007/13653/20666/18128/68431/20319/225743/17131/15258/50766
GO:0048592	GO:0048592	eye morphogenesis	79	0.300201	1.32821	0.074253	0.427017	0.384505	564	tags=22%, list=8%, signal=20%	18742/270190/20848/20510/13388/12677/54352/58235/59058/13508/20681/22339/11911/18212/19242/20666/18128
GO:0003012	GO:0003012	muscle system process	145	-0.30908	-1.32953	0.0748731	0.429455	0.3867	803	tags=19%, list=11%, signal=17%	12633/16590/18441/621054/19165/71544/56458/29856/110893/18159/74777/67731/106393/232854/16531/16480/17260/12289/230857/11555/13405/54598/98660/18018/12296/72821/20266
GO:0044419	GO:0044419	biological process involved in interspecies interaction between organisms	430	-0.251834	-1.21517	0.0751634	0.430537	0.387674	1021	tags=15%, list=14%, signal=14%	16363/235504/545370/192656/66824/20787/14824/53859/14455/235047/106869/80876/237868/68810/12633/22782/242864/16004/67248/67067/15979/56213/16476/18129/70796/12369/19211/67486/384309/14268/16172/18760/11810/56048/240354/100040462/19106/22038/100040563/17260/78781/235527/14734/320910/269855/11816/30936/16180/70097/225471/15064/12390/56615/67664/237886/16159/319278/15122/16173/22418/217480/193740/15…
GO:0009129	GO:0009129	pyrimidine nucleoside monophosphate metabolic process	14	-0.548974	-1.49044	0.0755906	0.432391	0.389344	359	tags=21%, list=5%, signal=20%	22271/76654/99586
GO:0002708	GO:0002708	positive regulation of lymphocyte mediated immunity	30	-0.446386	-1.45075	0.0756914	0.432391	0.389344	342	tags=27%, list=5%, signal=26%	268564/18762/77777/75698/240354/15064/16159/16173
GO:0070227	GO:0070227	lymphocyte apoptotic process	31	-0.438596	-1.44233	0.0758226	0.432557	0.389493	489	tags=32%, list=7%, signal=30%	384783/21808/101540/12369/19211/12505/14634/30936/18761/22418
GO:0017121	GO:0017121	plasma membrane phospholipid scrambling	10	-0.605493	-1.50668	0.0759494	0.432697	0.389619	2195	tags=70%, list=29%, signal=49%	219149/319581/108138/320091/497097/22038/235527
GO:1902001	GO:1902001	fatty acid transmembrane transport	11	-0.602404	-1.52415	0.0761905	0.433487	0.390331	1316	tags=55%, list=18%, signal=45%	19299/384783/26874/19300/20525/17250
GO:0034762	GO:0034762	regulation of transmembrane transport	239	-0.276981	-1.26389	0.0769231	0.437068	0.393555	964	tags=19%, list=13%, signal=17%	58234/65973/260297/12856/15512/20511/110862/81904/19165/16498/69563/22782/72401/211468/98741/12298/14609/15168/13483/98496/19894/19211/74777/18760/110784/16531/11932/110876/14167/432442/17260/12289/14734/16497/11555/57816/13405/170738/14813/98660/238271/18669/18823/12296/72821/20266
GO:0048015	GO:0048015	phosphatidylinositol-mediated signaling	62	-0.365289	-1.36995	0.0775401	0.439394	0.39565	1131	tags=23%, list=15%, signal=19%	21808/16001/20349/216439/19679/20682/19211/109294/14268/18213/19249/216505/16173/12319
GO:0048017	GO:0048017	inositol lipid-mediated signaling	62	-0.365289	-1.36995	0.0775401	0.439394	0.39565	1131	tags=23%, list=15%, signal=19%	21808/16001/20349/216439/19679/20682/19211/109294/14268/18213/19249/216505/16173/12319
GO:2000479	GO:2000479	regulation of cAMP-dependent protein kinase activity	11	0.548447	1.54263	0.077957	0.439418	0.395671	911	tags=36%, list=12%, signal=32%	230784/19087/18767/19084
GO:0045920	GO:0045920	negative regulation of exocytosis	16	0.477454	1.52458	0.0779944	0.439418	0.395671	1030	tags=56%, list=14%, signal=49%	15368/18128/11981/19349/14678/215449/110279/20983/109905
GO:0070633	GO:0070633	transepithelial transport	11	-0.601191	-1.52108	0.0777778	0.439418	0.395671	844	tags=36%, list=11%, signal=32%	26357/16438/17250/18669
GO:0008089	GO:0008089	anterograde axonal transport	35	0.377448	1.44703	0.0776789	0.439418	0.395671	1089	tags=31%, list=15%, signal=27%	67749/18039/360213/23859/73689/68724/67774/16573/228355/235180/12794
GO:0010660	GO:0010660	regulation of muscle cell apoptotic process	51	0.34687	1.4238	0.0780646	0.439418	0.395671	513	tags=18%, list=7%, signal=17%	56312/16880/11516/15368/11911/20656/26897/78688/319801
GO:0051928	GO:0051928	positive regulation of calcium ion transport	51	-0.378244	-1.37477	0.0781671	0.439418	0.395671	1394	tags=33%, list=19%, signal=27%	238161/20866/12257/14467/14169/22393/12767/19057/65973/15512/12298/16438/11941/12289/11555/18823/12296
GO:0022010	GO:0022010	central nervous system myelination	13	0.519706	1.5325	0.0790191	0.439728	0.395951	244	tags=23%, list=3%, signal=22%	15208/12805/21367
GO:0032291	GO:0032291	axon ensheathment in central nervous system	13	0.519706	1.5325	0.0790191	0.439728	0.395951	244	tags=23%, list=3%, signal=22%	15208/12805/21367
GO:0006805	GO:0006805	xenobiotic metabolic process	11	-0.60063	-1.51966	0.0793651	0.439728	0.395951	2022	tags=73%, list=27%, signal=53%	14870/71519/14866/19883/113868/12972/14862/320024
GO:0010667	GO:0010667	negative regulation of cardiac muscle cell apoptotic process	21	0.447384	1.51054	0.0785498	0.439728	0.395951	640	tags=19%, list=9%, signal=17%	56312/26897/78688/20319
GO:0060512	GO:0060512	prostate gland morphogenesis	11	-0.596895	-1.51021	0.0793651	0.439728	0.395951	1125	tags=45%, list=15%, signal=39%	16001/20377/20682/12505/22418
GO:0060740	GO:0060740	prostate gland epithelium morphogenesis	11	-0.596895	-1.51021	0.0793651	0.439728	0.395951	1125	tags=45%, list=15%, signal=39%	16001/20377/20682/12505/22418
GO:0072673	GO:0072673	lamellipodium morphogenesis	11	-0.595891	-1.50767	0.0793651	0.439728	0.395951	415	tags=27%, list=6%, signal=26%	12505/18606/14726
GO:0032148	GO:0032148	activation of protein kinase B activity	10	-0.602736	-1.49982	0.0791139	0.439728	0.395951	214	tags=40%, list=3%, signal=39%	17751/18213/16173/22418
GO:0099010	GO:0099010	modification of postsynaptic structure	21	0.444165	1.49967	0.0785498	0.439728	0.395951	1170	tags=33%, list=16%, signal=28%	29867/16443/108100/545156/215449/12631/112405
GO:0003382	GO:0003382	epithelial cell morphogenesis	21	0.443526	1.49752	0.0785498	0.439728	0.395951	222	tags=19%, list=3%, signal=19%	58208/20733/15901/72333
GO:0045646	GO:0045646	regulation of erythrocyte differentiation	28	-0.448445	-1.43356	0.078869	0.439728	0.395951	321	tags=18%, list=4%, signal=17%	74443/16909/241525/193740/15511
GO:0045321	GO:0045321	leukocyte activation	306	0.210813	1.1565	0.079516	0.439988	0.396185	549	tags=11%, list=7%, signal=11%	230126/12608/270190/58208/12575/102545/23882/14456/230899/16002/20848/12721/13388/94212/66993/277360/15205/12890/12445/18987/72147/15368/58194/13641/18030/11789/13653/22042/11987/19099/57914/16423/16852/20666
GO:0042445	GO:0042445	hormone metabolic process	57	-0.371833	-1.37123	0.0798376	0.440616	0.39675	1938	tags=44%, list=26%, signal=33%	18984/20394/69048/12876/98388/20397/114679/107522/11863/14815/30953/16001/19662/52028/105014/98711/114664/20502/16531/66375/230857/18549/21416/14600/22139
GO:0043269	GO:0043269	regulation of monoatomic ion transport	227	-0.279771	-1.26808	0.0797619	0.440616	0.39675	1498	tags=27%, list=20%, signal=23%	238871/246198/23797/13400/238161/24012/20866/12257/14467/14169/15275/20530/12300/22393/12767/19057/21808/13057/58234/65973/12856/15512/110862/81904/18441/19165/16498/69563/22782/211468/80297/98741/12298/16438/11941/14609/15168/13483/19211/74777/18760/110784/16531/11932/110876/14167/432442/12289/16497/11555/57816/13405/170738/14813/98660/238271/226781/18669/18823/12296/72821/20266
GO:0030510	GO:0030510	regulation of BMP signaling pathway	29	0.405725	1.4973	0.08	0.440937	0.397039	847	tags=41%, list=11%, signal=37%	15208/15205/94187/16007/20666/18128/68431/20319/225743/17131/15258/50766
GO:0002027	GO:0002027	regulation of heart rate	36	0.381835	1.47996	0.0803489	0.442116	0.3981	672	tags=28%, list=9%, signal=25%	16392/230899/20510/16511/54352/12290/70729/333433/12314/11486
GO:0055078	GO:0055078	sodium ion homeostasis	17	-0.509004	-1.45157	0.0804954	0.442116	0.3981	358	tags=35%, list=5%, signal=34%	246198/20512/110784/11932/57816/98660
GO:0002456	GO:0002456	T cell mediated immunity	26	-0.455149	-1.44266	0.0805271	0.442116	0.3981	1132	tags=35%, list=15%, signal=29%	268564/18762/77777/14466/13848/240354/15064/16159/16173
GO:0009636	GO:0009636	response to toxic substance	48	-0.381785	-1.37231	0.0811554	0.444988	0.400687	844	tags=25%, list=11%, signal=22%	26357/140742/22782/14862/12799/17250/19106/17751/226781/18669/72821/20266
GO:0002292	GO:0002292	T cell differentiation involved in immune response	20	0.431847	1.44405	0.0818182	0.448042	0.403437	80	tags=15%, list=1%, signal=15%	230126/23882/20848
GO:1904029	GO:1904029	regulation of cyclin-dependent protein kinase activity	41	0.376605	1.49204	0.0821479	0.449194	0.404474	554	tags=17%, list=7%, signal=16%	12575/12577/12427/12445/12447/11789/13649
GO:0034329	GO:0034329	cell junction assembly	198	-0.287757	-1.28808	0.0822408	0.449194	0.404474	1396	tags=25%, list=19%, signal=21%	75409/226352/18417/192197/71436/19271/75739/73061/70546/16410/399558/50791/77090/243725/244895/58234/12552/13837/103967/17762/227580/13631/216560/73728/74762/18208/26875/14609/19211/13643/14268/230661/13048/53321/16480/17260/320840/76965/18191/18606/16180/18213/331461/54409/13841/19249/14394/22418/20194
GO:0002221	GO:0002221	pattern recognition receptor signaling pathway	58	-0.369569	-1.36812	0.082544	0.449689	0.40492	220	tags=10%, list=3%, signal=10%	78781/30936/225471/67664/193740/15511
GO:0002758	GO:0002758	innate immune response-activating signaling pathway	58	-0.369569	-1.36812	0.082544	0.449689	0.40492	220	tags=10%, list=3%, signal=10%	78781/30936/225471/67664/193740/15511
GO:0099563	GO:0099563	modification of synaptic structure	25	0.4244	1.48616	0.0828025	0.450518	0.405666	1170	tags=32%, list=16%, signal=27%	29867/16443/242667/108100/545156/215449/12631/112405
GO:0015804	GO:0015804	neutral amino acid transport	18	0.472867	1.56527	0.0839041	0.451291	0.406362	831	tags=33%, list=11%, signal=30%	21366/20510/17254/55963/14057/20539
GO:0035999	GO:0035999	tetrahydrofolate interconversion	10	0.562566	1.53762	0.0837838	0.451291	0.406362	628	tags=40%, list=8%, signal=37%	17768/108037/17769/270685
GO:1901096	GO:1901096	regulation of autophagosome maturation	10	-0.597299	-1.48629	0.0838608	0.451291	0.406362	1271	tags=50%, list=17%, signal=42%	74374/100502698/12752/17281/11555
GO:1903729	GO:1903729	regulation of plasma membrane organization	10	-0.597233	-1.48613	0.0838608	0.451291	0.406362	489	tags=40%, list=7%, signal=37%	108138/12369/11982/20194
GO:0032649	GO:0032649	regulation of type II interferon production	29	0.402206	1.48431	0.0830769	0.451291	0.406362	109	tags=10%, list=1%, signal=10%	16392/14456/22761
GO:0015695	GO:0015695	organic cation transport	19	0.439193	1.45637	0.0833333	0.451291	0.406362	1093	tags=37%, list=15%, signal=32%	18987/110834/74136/214663/243328/57279/18799
GO:0009112	GO:0009112	nucleobase metabolic process	22	-0.463859	-1.42309	0.0835777	0.451291	0.406362	462	tags=14%, list=6%, signal=13%	104776/99586/22139
GO:0006643	GO:0006643	membrane lipid metabolic process	86	-0.335562	-1.33144	0.0836601	0.451291	0.406362	1948	tags=40%, list=26%, signal=30%	228094/110417/68865/100340/12916/69048/70757/26877/76524/20397/56336/81535/74244/70750/329777/14667/14466/208449/18700/108105/67916/16590/15211/27392/15212/50784/17939/433931/223753/68563/320910/18606/433323/26938
GO:0032940	GO:0032940	secretion by cell	391	0.203808	1.13775	0.0832007	0.451291	0.406362	1044	tags=21%, list=14%, signal=19%	16392/14812/11516/228942/230899/12721/74551/381677/17932/16443/14299/80976/12890/277978/15368/66259/18795/19339/110834/20969/22249/171580/68039/27883/71764/12290/13640/269951/18212/56513/14672/20666/53627/13649/18128/54003/11981/18012/19349/12048/64051/16522/109305/14678/26399/13446/242662/18754/11785/56455/11799/56013/545156/216363/215449/11419/22063/67826/20677/22350/106572/16573/12288/19084/21…
GO:0070873	GO:0070873	regulation of glycogen metabolic process	18	0.471015	1.55914	0.0847559	0.452203	0.407183	78	tags=11%, list=1%, signal=11%	14783/16002
GO:0042558	GO:0042558	pteridine-containing compound metabolic process	18	0.470888	1.55872	0.0847559	0.452203	0.407183	207	tags=22%, list=3%, signal=22%	216188/17768/108037/17769
GO:0032732	GO:0032732	positive regulation of interleukin-1 production	22	0.445575	1.52032	0.084375	0.452203	0.407183	401	tags=18%, list=5%, signal=17%	16392/20848/16007/13653
GO:0044819	GO:0044819	mitotic G1/S transition checkpoint signaling	13	0.50495	1.48899	0.0844687	0.452203	0.407183	91	tags=15%, list=1%, signal=15%	12575/12795
GO:0009581	GO:0009581	detection of external stimulus	28	-0.444511	-1.42099	0.0848214	0.452203	0.407183	797	tags=32%, list=11%, signal=29%	16590/12298/11941/12814/17035/16480/110789/16173/18545
GO:0009582	GO:0009582	detection of abiotic stimulus	28	-0.444511	-1.42099	0.0848214	0.452203	0.407183	797	tags=32%, list=11%, signal=29%	16590/12298/11941/12814/17035/16480/110789/16173/18545
GO:0061515	GO:0061515	myeloid cell development	36	-0.414937	-1.41136	0.0846485	0.452203	0.407183	34	tags=14%, list=0%, signal=14%	319653/16590/18129/15122/110257
GO:0014048	GO:0014048	regulation of glutamate secretion	10	0.55467	1.51603	0.0864865	0.452629	0.407567	18	tags=10%, list=0%, signal=10%	14812
GO:0090201	GO:0090201	negative regulation of release of cytochrome c from mitochondria	12	0.532893	1.50185	0.086351	0.452629	0.407567	963	tags=42%, list=13%, signal=36%	78688/105675/14297/12048/381038
GO:0035641	GO:0035641	locomotory exploration behavior	11	-0.586478	-1.48385	0.0857143	0.452629	0.407567	964	tags=36%, list=13%, signal=32%	58234/14824/11816/98660
GO:0097475	GO:0097475	motor neuron migration	11	-0.586336	-1.4835	0.0857143	0.452629	0.407567	1014	tags=45%, list=14%, signal=39%	16869/18208/12614/11923/94222
GO:0009066	GO:0009066	aspartate family amino acid metabolic process	16	0.463398	1.47969	0.086351	0.452629	0.407567	519	tags=25%, list=7%, signal=23%	27053/17769/11911/67873
GO:0031076	GO:0031076	embryonic camera-type eye development	20	-0.491195	-1.46746	0.0863095	0.452629	0.407567	934	tags=65%, list=13%, signal=57%	22158/327826/74019/16974/21417/17684/81896/100169/98711/67661/106633/213081/14238
GO:0002287	GO:0002287	alpha-beta T cell activation involved in immune response	19	0.436465	1.44732	0.0863095	0.452629	0.407567	80	tags=16%, list=1%, signal=16%	230126/23882/20848
GO:0002293	GO:0002293	alpha-beta T cell differentiation involved in immune response	19	0.436465	1.44732	0.0863095	0.452629	0.407567	80	tags=16%, list=1%, signal=16%	230126/23882/20848
GO:0002294	GO:0002294	CD4-positive, alpha-beta T cell differentiation involved in immune response	19	0.436465	1.44732	0.0863095	0.452629	0.407567	80	tags=16%, list=1%, signal=16%	230126/23882/20848
GO:0042093	GO:0042093	T-helper cell differentiation	19	0.436465	1.44732	0.0863095	0.452629	0.407567	80	tags=16%, list=1%, signal=16%	230126/23882/20848
GO:0046632	GO:0046632	alpha-beta T cell differentiation	36	0.364821	1.41402	0.0852459	0.452629	0.407567	80	tags=11%, list=1%, signal=11%	230126/58208/23882/20848
GO:0090307	GO:0090307	mitotic spindle assembly	37	-0.409161	-1.40631	0.0854701	0.452629	0.407567	14	tags=8%, list=0%, signal=8%	212514/193740/15511
GO:0061326	GO:0061326	renal tubule development	43	0.348557	1.4008	0.0853242	0.452629	0.407567	620	tags=26%, list=8%, signal=24%	15208/18654/13388/16776/15205/20681/22339/67087/107515/18128/14160
GO:0072009	GO:0072009	nephron epithelium development	44	0.343049	1.38011	0.0865052	0.452629	0.407567	564	tags=23%, list=8%, signal=21%	15208/18654/13388/16776/15205/20681/22339/67087/107515/18128
GO:0006367	GO:0006367	transcription initiation at RNA polymerase II promoter	56	0.3184	1.33929	0.0861535	0.452629	0.407567	2914	tags=71%, list=39%, signal=44%	99730/20933/67087/80509/192191/235459/67224/68705/68153/22059/28077/13486/67710/69241/229906/24075/67923/226182/20024/69792/98053/67089/67279/17188/55982/108098/66467/319944/59024/13870/20807/381379/225895/68776/74197/12572/21343/21833/67219/15289
GO:0048168	GO:0048168	regulation of neuronal synaptic plasticity	37	0.368147	1.42532	0.0866667	0.452914	0.407823	401	tags=19%, list=5%, signal=18%	14812/435145/381677/21367/19339/22249/13653
GO:0010092	GO:0010092	specification of animal organ identity	15	0.475647	1.48388	0.0871935	0.455105	0.409796	160	tags=13%, list=2%, signal=13%	16392/66993
GO:0060831	GO:0060831	smoothened signaling pathway involved in dorsal/ventral neural tube patterning	13	-0.553306	-1.46801	0.088189	0.458845	0.413164	934	tags=69%, list=13%, signal=61%	22158/240888/74019/14633/81896/380718/213081/14634/544696
GO:0090596	GO:0090596	sensory organ morphogenesis	119	-0.315994	-1.3242	0.0882353	0.458845	0.413164	1067	tags=27%, list=14%, signal=23%	11921/19662/29815/16869/81896/100169/20682/216560/76260/17828/67671/244585/67661/18208/14051/11941/18129/269831/110380/12814/213081/70300/12614/23965/14634/16206/14238/18423/229759/12832/22418/12307
GO:0006066	GO:0006066	alcohol metabolic process	125	-0.309802	-1.30441	0.0882353	0.458845	0.413164	1038	tags=24%, list=14%, signal=21%	18145/19286/19662/14466/233011/56050/20787/320404/67916/105014/18441/98711/242864/53881/50784/327655/16890/29807/114663/19211/72562/16531/66375/68563/17751/11816/105501/65970/433323/22139
GO:0048265	GO:0048265	response to pain	12	0.529248	1.49158	0.0891365	0.460371	0.414538	1175	tags=50%, list=16%, signal=42%	14812/12290/56461/19699/56717/12334
GO:1900006	GO:1900006	positive regulation of dendrite development	12	0.526876	1.48489	0.0891365	0.460371	0.414538	536	tags=25%, list=7%, signal=23%	22359/16975/19242
GO:0072676	GO:0072676	lymphocyte migration	27	0.40744	1.48415	0.088685	0.460371	0.414538	337	tags=22%, list=5%, signal=21%	14456/20868/57266/12721/216892/18810
GO:1902116	GO:1902116	negative regulation of organelle assembly	25	0.422569	1.47975	0.089172	0.460371	0.414538	193	tags=8%, list=3%, signal=8%	56312/225020
GO:0090659	GO:0090659	walking behavior	24	-0.457398	-1.42776	0.0891813	0.460371	0.414538	1257	tags=42%, list=17%, signal=35%	74244/18145/170719/17762/15211/80297/12298/13643/16531/57754
GO:0072089	GO:0072089	stem cell proliferation	51	-0.374592	-1.3615	0.0889488	0.460371	0.414538	1036	tags=25%, list=14%, signal=22%	14466/52335/207742/20682/22341/12006/19106/22601/14634/18505/18018/18669/22418
GO:1905897	GO:1905897	regulation of response to endoplasmic reticulum stress	42	0.345749	1.37849	0.0893471	0.460665	0.414803	641	tags=14%, list=9%, signal=13%	56312/64209/77006/74840/12048/19246
GO:0019932	GO:0019932	second-messenger-mediated signaling	98	0.281231	1.29227	0.0896917	0.461318	0.415391	1043	tags=26%, list=14%, signal=22%	668940/11516/230899/18585/16728/23964/18013/52589/30937/210044/22339/216150/18212/13649/18012/12314/11486/15254/26557/17748/215999/20191/56717/14433/52076
GO:0015849	GO:0015849	organic acid transport	111	0.266793	1.24747	0.0896917	0.461318	0.415391	711	tags=15%, list=10%, signal=14%	11989/21366/14812/12140/12903/20510/17254/68039/11987/14077/55963/18212/16592/64051/14057/26399/214663
GO:0008090	GO:0008090	retrograde axonal transport	15	0.474482	1.48025	0.0899183	0.461362	0.415431	1121	tags=33%, list=15%, signal=28%	67749/18039/23859/16573/81907
GO:0009069	GO:0009069	serine family amino acid metabolic process	17	0.443209	1.44073	0.0898876	0.461362	0.415431	1018	tags=29%, list=14%, signal=25%	100678/108037/107272/50493/236539
GO:1901616	GO:1901616	organic hydroxy compound catabolic process	16	-0.507138	-1.42741	0.0902022	0.461729	0.415761	991	tags=31%, list=13%, signal=27%	56050/114663/19211/17751/11816
GO:0001890	GO:0001890	placenta development	66	0.312618	1.34611	0.0902078	0.461729	0.415761	554	tags=15%, list=7%, signal=14%	12608/20733/16002/12577/14388/15205/16007/16477/19242/13649
GO:0042100	GO:0042100	B cell proliferation	22	0.457339	1.56046	0.0934963	0.462199	0.416184	996	tags=32%, list=13%, signal=28%	230126/12575/22042/11486/51797/17319/12151
GO:1900037	GO:1900037	regulation of cellular response to hypoxia	11	0.535651	1.50664	0.0913978	0.462199	0.416184	876	tags=36%, list=12%, signal=32%	16526/78688/74769/69219
GO:0062149	GO:0062149	detection of stimulus involved in sensory perception of pain	10	0.549321	1.50141	0.0918919	0.462199	0.416184	153	tags=30%, list=2%, signal=29%	14812/270190/12297
GO:0097734	GO:0097734	extracellular exosome biogenesis	11	0.529957	1.49062	0.094086	0.462199	0.416184	1128	tags=45%, list=15%, signal=39%	20969/11981/19349/22088/27681
GO:1990182	GO:1990182	exosomal secretion	11	0.529957	1.49062	0.094086	0.462199	0.416184	1128	tags=45%, list=15%, signal=39%	20969/11981/19349/22088/27681
GO:0072577	GO:0072577	endothelial cell apoptotic process	14	0.485737	1.48406	0.0926431	0.462199	0.416184	169	tags=21%, list=2%, signal=21%	57875/14456/15901
GO:2000351	GO:2000351	regulation of endothelial cell apoptotic process	14	0.485737	1.48406	0.0926431	0.462199	0.416184	169	tags=21%, list=2%, signal=21%	57875/14456/15901
GO:2000108	GO:2000108	positive regulation of leukocyte apoptotic process	11	-0.579595	-1.46644	0.0936508	0.462199	0.416184	415	tags=45%, list=6%, signal=43%	170770/21808/12505/17260/22418
GO:0048599	GO:0048599	oocyte development	26	0.408885	1.45249	0.0940439	0.462199	0.416184	1585	tags=46%, list=21%, signal=36%	230126/20112/18795/12531/15078/22417/13121/67141/12387/69716/213541/268697
GO:0032885	GO:0032885	regulation of polysaccharide biosynthetic process	18	0.432912	1.43301	0.0934844	0.462199	0.416184	78	tags=11%, list=1%, signal=11%	14783/16002
GO:0048010	GO:0048010	vascular endothelial growth factor receptor signaling pathway	17	0.440094	1.4306	0.0926966	0.462199	0.416184	266	tags=18%, list=4%, signal=17%	14783/18654/22339
GO:0031111	GO:0031111	negative regulation of microtubule polymerization or depolymerization	32	0.384233	1.42945	0.0915254	0.462199	0.416184	1173	tags=38%, list=16%, signal=32%	260315/23805/20257/11789/17755/67254/68041/208158/108903/16800/227634/13589
GO:0090207	GO:0090207	regulation of triglyceride metabolic process	21	-0.472349	-1.42753	0.0923994	0.462199	0.416184	1199	tags=43%, list=16%, signal=36%	228859/16835/77582/100504663/20787/20660/11810/11816/21416
GO:0033032	GO:0033032	regulation of myeloid cell apoptotic process	17	-0.499918	-1.42566	0.0913313	0.462199	0.416184	858	tags=35%, list=12%, signal=31%	320404/20440/19211/12505/17260/16173
GO:0030835	GO:0030835	negative regulation of actin filament depolymerization	18	-0.492154	-1.42262	0.0939908	0.462199	0.416184	957	tags=33%, list=13%, signal=29%	21916/20947/225115/110380/213556/65970
GO:0001974	GO:0001974	blood vessel remodeling	25	-0.450854	-1.42086	0.0915698	0.462199	0.416184	697	tags=28%, list=9%, signal=25%	16401/69660/14609/18159/13717/17260/16173
GO:0045778	GO:0045778	positive regulation of ossification	25	-0.450601	-1.42006	0.0915698	0.462199	0.416184	237	tags=16%, list=3%, signal=16%	17260/11555/110789/22418
GO:0060071	GO:0060071	Wnt signaling pathway, planar cell polarity pathway	19	-0.482054	-1.41872	0.0930931	0.462199	0.416184	1060	tags=26%, list=14%, signal=23%	20377/380718/12614/14734/22418
GO:0060443	GO:0060443	mammary gland morphogenesis	24	-0.454292	-1.41807	0.0935673	0.462199	0.416184	2472	tags=54%, list=33%, signal=36%	18033/16974/18854/14633/17979/19876/12234/14815/18208/104156/14634/18505/22418
GO:0050885	GO:0050885	neuromuscular process controlling balance	34	-0.420922	-1.41377	0.0906516	0.462199	0.416184	1182	tags=38%, list=16%, signal=32%	224129/20512/14667/12752/58234/12751/15211/15212/11941/12323/16531/53321/14813
GO:0048013	GO:0048013	ephrin receptor signaling pathway	20	0.421682	1.41006	0.0909091	0.462199	0.416184	730	tags=30%, list=10%, signal=27%	13842/270190/13641/13640/18128/12569
GO:0042742	GO:0042742	defense response to bacterium	41	-0.400365	-1.38841	0.092827	0.462199	0.416184	1081	tags=41%, list=15%, signal=36%	20416/98999/13057/192656/66824/14824/106869/22782/67248/67067/18129/12369/19211/18760/269855/15064/16173
GO:2000243	GO:2000243	positive regulation of reproductive process	36	-0.406388	-1.38228	0.0932568	0.462199	0.416184	768	tags=25%, list=10%, signal=23%	20682/18441/22762/54611/12323/14609/213389/16173/22418
GO:0051606	GO:0051606	detection of stimulus	47	-0.384581	-1.37979	0.0941337	0.462199	0.416184	1471	tags=38%, list=20%, signal=31%	16328/15376/20866/12257/12767/16410/19662/16590/12298/11941/12814/17035/22601/16480/269855/110789/16173/18545
GO:0007044	GO:0007044	cell-substrate junction assembly	47	-0.384123	-1.37815	0.0941337	0.462199	0.416184	1576	tags=34%, list=21%, signal=27%	19272/68606/109711/226352/192197/19271/16410/244895/12552/13837/216560/19211/14268/230661/18606/20194
GO:0046631	GO:0046631	alpha-beta T cell activation	48	0.329039	1.35354	0.0909091	0.462199	0.416184	80	tags=10%, list=1%, signal=10%	230126/12608/58208/23882/20848
GO:0009799	GO:0009799	specification of symmetry	60	-0.36257	-1.35074	0.0923695	0.462199	0.416184	1680	tags=37%, list=23%, signal=29%	277939/11477/52906/110350/269878/74025/329795/21821/216274/380718/213575/16348/244585/67661/106633/18129/14609/231214/17260/544696/51938/22418
GO:0009855	GO:0009855	determination of bilateral symmetry	60	-0.36257	-1.35074	0.0923695	0.462199	0.416184	1680	tags=37%, list=23%, signal=29%	277939/11477/52906/110350/269878/74025/329795/21821/216274/380718/213575/16348/244585/67661/106633/18129/14609/231214/17260/544696/51938/22418
GO:0022404	GO:0022404	molting cycle process	51	-0.37042	-1.34634	0.0943396	0.462199	0.416184	1131	tags=25%, list=15%, signal=22%	21808/227377/73822/20682/19165/15220/83925/70300/11695/12614/16206/171211/22418
GO:0022405	GO:0022405	hair cycle process	51	-0.37042	-1.34634	0.0943396	0.462199	0.416184	1131	tags=25%, list=15%, signal=22%	21808/227377/73822/20682/19165/15220/83925/70300/11695/12614/16206/171211/22418
GO:0050679	GO:0050679	positive regulation of epithelial cell proliferation	84	-0.334495	-1.32027	0.0936675	0.462199	0.416184	1081	tags=27%, list=15%, signal=24%	13057/20377/216439/101540/14824/12633/20682/16401/56213/16438/16476/18129/22341/19275/15117/14369/18760/114142/22601/21416/12390/16173/22418
GO:0043588	GO:0043588	skin development	99	-0.324888	-1.31799	0.0931436	0.462199	0.416184	803	tags=24%, list=11%, signal=22%	81535/14284/230793/21808/14466/73822/12633/20682/19165/56338/16661/15220/83925/70300/11695/12614/105171/22601/16480/21416/171211/12832/16173/22418
GO:0009615	GO:0009615	response to virus	116	-0.313267	-1.30295	0.0939511	0.462199	0.416184	606	tags=16%, list=8%, signal=14%	15979/56213/70796/67486/384309/16172/11810/56048/100040462/19106/22038/78781/320910/225471/67664/237886/16159/319278
GO:0050900	GO:0050900	leukocyte migration	89	0.285209	1.29853	0.0917699	0.462199	0.416184	1003	tags=25%, list=13%, signal=22%	18654/14456/20868/57266/12721/277360/18795/22339/216892/319655/18810/54371/16423/19242/11486/18081/13052/12317/215999/17319/110279/67767
GO:0030099	GO:0030099	myeloid cell differentiation	171	-0.293589	-1.29119	0.0916976	0.462199	0.416184	1060	tags=18%, list=14%, signal=16%	227377/20377/70564/14466/214133/12398/319653/320404/12633/16590/19165/24067/74443/13423/16476/18129/20535/100040462/16909/241525/12326/22038/17260/14734/320910/57816/18018/15122/193740/15511/110257
GO:0010639	GO:0010639	negative regulation of organelle organization	202	0.23552	1.19841	0.091956	0.462199	0.416184	1232	tags=25%, list=17%, signal=21%	56312/12721/260315/23805/225020/20112/29816/80880/15937/67629/56320/20257/11789/22042/78688/105675/319801/21754/17755/20742/19241/67254/14297/12048/68350/15078/11799/11740/68041/208158/26425/14026/72400/20983/381038/12631/235661/235180/108903/93762/52696/26949/16800/51800/227634/66977/13589/52276/209334/18148
GO:1903829	GO:1903829	positive regulation of protein localization	258	0.213687	1.1405	0.0941406	0.462199	0.416184	977	tags=18%, list=13%, signal=16%	16392/230784/237611/14456/12795/74551/15444/12297/66259/18795/22339/18709/22249/71764/11789/77006/22042/21754/56513/20742/19242/14672/13649/333433/279561/18053/15461/68112/109305/18754/11785/12569/56455/226016/22063/20677/22350/16573/12288/19084/215999/72400/66233/67151/12631/19384
GO:1904706	GO:1904706	negative regulation of vascular associated smooth muscle cell proliferation	16	0.457036	1.45938	0.0947075	0.463388	0.417254	446	tags=31%, list=6%, signal=29%	12575/15368/106014/29811/20656
GO:0048645	GO:0048645	animal organ formation	27	0.398831	1.45279	0.0948012	0.463388	0.417254	368	tags=15%, list=5%, signal=14%	16392/66993/15205/21380
GO:0062098	GO:0062098	regulation of programmed necrotic cell death	18	0.461496	1.52763	0.0950196	0.463919	0.417733	6	tags=6%, list=0%, signal=6%	56312
GO:0031113	GO:0031113	regulation of microtubule polymerization	35	-0.416144	-1.40802	0.0954416	0.465443	0.419105	308	tags=9%, list=4%, signal=8%	72205/193740/15511
GO:0001541	GO:0001541	ovarian follicle development	31	0.385509	1.42717	0.0957096	0.466212	0.419798	621	tags=19%, list=8%, signal=18%	12608/11516/381677/22339/56436/12048
GO:0030212	GO:0030212	hyaluronan metabolic process	14	-0.533906	-1.44953	0.096063	0.466765	0.420296	759	tags=43%, list=10%, signal=39%	15211/15212/27416/12505/15117/16426
GO:0042116	GO:0042116	macrophage activation	23	-0.46114	-1.42227	0.0961538	0.466765	0.420296	2036	tags=43%, list=27%, signal=32%	16478/16835/16452/19883/77777/17470/14824/15979/16476/22418
GO:0050807	GO:0050807	regulation of synapse organization	155	-0.296133	-1.2839	0.0960809	0.466765	0.420296	1079	tags=23%, list=14%, signal=20%	399558/50791/243725/12752/58234/103967/227580/13631/19165/73728/74762/18208/30785/12323/72289/104156/19211/23829/18011/108672/13643/13048/56508/53321/17260/320840/76965/11816/16180/18213/331461/13841/19249/22418/217480
GO:0042771	GO:0042771	intrinsic apoptotic signaling pathway in response to DNA damage by p53 class mediator	22	0.452561	1.54416	0.0972642	0.466961	0.420472	48	tags=9%, list=1%, signal=9%	56312/12575
GO:0010955	GO:0010955	negative regulation of protein processing	10	0.547773	1.49718	0.0972973	0.466961	0.420472	2	tags=10%, list=0%, signal=10%	69065
GO:1903318	GO:1903318	negative regulation of protein maturation	10	0.547773	1.49718	0.0972973	0.466961	0.420472	2	tags=10%, list=0%, signal=10%	69065
GO:0045836	GO:0045836	positive regulation of meiotic nuclear division	12	-0.560527	-1.47261	0.096423	0.466961	0.420472	530	tags=33%, list=7%, signal=31%	12323/14609/213389/22418
GO:0030318	GO:0030318	melanocyte differentiation	12	-0.560024	-1.47129	0.096423	0.466961	0.420472	1248	tags=50%, list=17%, signal=42%	192236/223838/24136/16590/17260/14634
GO:1902475	GO:1902475	L-alpha-amino acid transmembrane transport	26	0.405699	1.44118	0.0971787	0.466961	0.420472	831	tags=27%, list=11%, signal=24%	11989/20510/17254/11987/55963/214663/20539
GO:0038061	GO:0038061	NIK/NF-kappaB signaling	44	-0.391868	-1.38465	0.0967742	0.466961	0.420472	358	tags=14%, list=5%, signal=13%	110784/240354/19106/70097/171211/16173
GO:0048041	GO:0048041	focal adhesion assembly	44	-0.391279	-1.38257	0.0967742	0.466961	0.420472	1576	tags=34%, list=21%, signal=27%	19272/68606/109711/226352/192197/19271/16410/244895/12552/13837/216560/19211/230661/18606/20194
GO:1902600	GO:1902600	proton transmembrane transport	37	-0.399463	-1.37298	0.0968661	0.466961	0.420472	358	tags=22%, list=5%, signal=21%	12856/226139/110784/72392/66237/72961/57816/98660
GO:0050778	GO:0050778	positive regulation of immune response	175	-0.291165	-1.28021	0.0967742	0.466961	0.420472	500	tags=11%, list=7%, signal=11%	18159/19211/67486/384309/12505/240354/100040462/22038/17260/78781/30936/225471/18761/15064/67664/16159/16173/22418/193740/15511
GO:0048771	GO:0048771	tissue remodeling	66	-0.35003	-1.32422	0.0977543	0.468623	0.421969	1210	tags=27%, list=16%, signal=23%	16889/21808/16410/20377/12751/16401/66180/69660/18129/20535/14609/18159/13717/241525/17260/11555/18669/16173
GO:0035136	GO:0035136	forelimb morphogenesis	10	-0.586047	-1.45829	0.0981013	0.468694	0.422032	934	tags=50%, list=13%, signal=44%	81896/98711/244585/58198/11695
GO:0060547	GO:0060547	negative regulation of necrotic cell death	15	0.464038	1.44767	0.0980926	0.468694	0.422032	6	tags=7%, list=0%, signal=7%	56312
GO:0001889	GO:0001889	liver development	60	0.313445	1.33045	0.0980392	0.468694	0.422032	564	tags=20%, list=8%, signal=19%	12608/100102/22773/74551/15205/15368/11692/20656/225631/19242/13649/18128
GO:0007631	GO:0007631	feeding behavior	31	0.382891	1.41748	0.0990099	0.470258	0.423441	244	tags=13%, list=3%, signal=13%	14812/20848/18996/21367
GO:0010837	GO:0010837	regulation of keratinocyte proliferation	23	-0.457949	-1.41243	0.0991124	0.470258	0.423441	934	tags=39%, list=13%, signal=34%	81896/21821/68259/67661/18129/15117/18760/22601/18018
GO:0032722	GO:0032722	positive regulation of chemokine production	19	-0.479369	-1.41082	0.0990991	0.470258	0.423441	371	tags=37%, list=5%, signal=35%	192656/66824/16172/19106/225471/16173/22418
GO:2000106	GO:2000106	regulation of leukocyte apoptotic process	34	-0.412804	-1.3865	0.0991501	0.470258	0.423441	1131	tags=32%, list=15%, signal=28%	21808/101540/320404/20440/19211/12505/17260/30936/18761/16173/22418
GO:0003018	GO:0003018	vascular process in circulatory system	71	-0.347769	-1.33323	0.0992063	0.470258	0.423441	930	tags=31%, list=12%, signal=27%	11600/20416/19271/14815/27494/67378/26357/20525/18441/54611/71544/14609/17250/20502/16531/230857/11816/11555/54409/98660/18669/16173
GO:0046660	GO:0046660	female sex differentiation	57	0.313531	1.32579	0.0988593	0.470258	0.423441	335	tags=11%, list=4%, signal=10%	56312/12608/11516/381677/22339/12841
GO:0050796	GO:0050796	regulation of insulin secretion	98	0.277837	1.27668	0.0987253	0.470258	0.423441	1146	tags=27%, list=15%, signal=23%	16392/74551/17932/66259/18795/71764/12290/13640/14672/16522/109305/18754/56455/11799/22063/20677/16573/12288/19084/215999/67151/67767/68267/66461/223527/12801
GO:0032881	GO:0032881	regulation of polysaccharide metabolic process	20	0.412898	1.38069	0.1	0.472569	0.425522	78	tags=10%, list=1%, signal=10%	14783/16002
GO:0071407	GO:0071407	cellular response to organic cyclic compound	199	0.227411	1.16117	0.099926	0.472569	0.425522	921	tags=18%, list=12%, signal=16%	16392/67749/13685/20848/18996/20510/74551/14406/210044/18795/20606/13653/13640/77006/11911/18212/77889/14672/56506/13649/11803/18196/17927/353310/68350/353342/18197/215449/22350/15502/57028/12317/16011/64143/20191
GO:0051050	GO:0051050	positive regulation of transport	425	0.199386	1.10747	0.100029	0.472569	0.425522	977	tags=18%, list=13%, signal=17%	16392/14812/12608/100102/11516/237611/14456/230899/54377/12795/74551/13388/16511/16443/14299/15444/12297/12805/104215/22141/360213/66259/29816/18795/19339/22339/18709/20969/22249/68039/71764/11911/14077/13193/16423/56513/14672/20666/13649/333433/279561/54003/13660/15461/19349/12048/109305/14678/12314/22041/26399/13446/18754/11785/12569/56455/67774/19699/22063/20677/20539/22350/12317/106572/16573/…
GO:0043616	GO:0043616	keratinocyte proliferation	25	-0.443074	-1.39634	0.100291	0.473274	0.426157	934	tags=36%, list=13%, signal=32%	81896/21821/68259/67661/18129/15117/18760/22601/18018
GO:0042158	GO:0042158	lipoprotein biosynthetic process	60	-0.35858	-1.33588	0.100402	0.473274	0.426157	2945	tags=55%, list=40%, signal=34%	68268/225651/55981/13167/224454/76686/67292/67556/233575/98732/18107/70605/110417/69048/17777/226407/54636/225326/74244/70546/329777/52639/14466/18700/75744/27392/70796/108672/433931/11810/68563/73683/11816
GO:0090181	GO:0090181	regulation of cholesterol metabolic process	15	-0.518828	-1.42596	0.100787	0.474037	0.426843	3213	tags=87%, list=43%, signal=49%	244373/76483/20655/235623/226144/170459/13360/18984/68865/14792/16835/20787/11816
GO:0098660	GO:0098660	inorganic ion transmembrane transport	282	-0.266654	-1.23792	0.100694	0.474037	0.426843	867	tags=18%, list=12%, signal=17%	15512/226139/110862/54403/320091/20516/81904/19165/103098/16498/69563/22782/211468/98741/12298/16438/11941/110893/15168/13483/19211/27416/74777/18760/110784/74051/16531/72392/11932/110876/14167/432442/12289/16439/66237/57138/16497/11555/72961/57816/13405/170738/14813/14399/14394/98660/238271/226781/18823/12296/72821/20266
GO:0060122	GO:0060122	inner ear receptor cell stereocilium organization	19	0.424065	1.40621	0.10119	0.475036	0.427743	323	tags=16%, list=4%, signal=15%	15208/15205/67042
GO:0008088	GO:0008088	axo-dendritic transport	59	0.310105	1.31134	0.101562	0.475036	0.427743	1121	tags=27%, list=15%, signal=23%	67749/18039/360213/18040/23859/73689/16594/68724/15481/67774/16573/228355/22223/235180/12794/81907
GO:0030198	GO:0030198	extracellular matrix organization	100	-0.321204	-1.30969	0.101673	0.475036	0.427743	1436	tags=34%, list=19%, signal=28%	108154/56693/99011/17181/69675/223838/74025/21808/399558/14453/545370/52335/58859/12633/20682/70779/66180/94214/13717/12814/15117/14268/12006/69538/108075/64075/213945/77739/54409/12390/14238/14726/12832/16773
GO:0043062	GO:0043062	extracellular structure organization	100	-0.321204	-1.30969	0.101673	0.475036	0.427743	1436	tags=34%, list=19%, signal=28%	108154/56693/99011/17181/69675/223838/74025/21808/399558/14453/545370/52335/58859/12633/20682/70779/66180/94214/13717/12814/15117/14268/12006/69538/108075/64075/213945/77739/54409/12390/14238/14726/12832/16773
GO:0045229	GO:0045229	external encapsulating structure organization	100	-0.321204	-1.30969	0.101673	0.475036	0.427743	1436	tags=34%, list=19%, signal=28%	108154/56693/99011/17181/69675/223838/74025/21808/399558/14453/545370/52335/58859/12633/20682/70779/66180/94214/13717/12814/15117/14268/12006/69538/108075/64075/213945/77739/54409/12390/14238/14726/12832/16773
GO:0007254	GO:0007254	JNK cascade	74	0.294405	1.29078	0.101266	0.475036	0.427743	640	tags=16%, list=9%, signal=15%	270190/23882/230899/244923/71751/22032/18795/21987/19099/13649/15461/20319
GO:0043030	GO:0043030	regulation of macrophage activation	13	-0.542025	-1.43808	0.102362	0.476677	0.429221	2036	tags=54%, list=27%, signal=39%	16478/16835/19883/77777/17470/14824/22418
GO:0050728	GO:0050728	negative regulation of inflammatory response	47	0.342318	1.40421	0.10228	0.476677	0.429221	36	tags=4%, list=0%, signal=4%	16392/11516
GO:0051051	GO:0051051	negative regulation of transport	224	0.225445	1.18537	0.102271	0.476677	0.429221	1046	tags=23%, list=14%, signal=20%	14783/100102/29867/11516/12721/16511/12297/104215/15205/15368/268445/68039/22248/11911/23921/269951/107065/19720/78688/18611/105675/16423/16592/17755/230734/106522/279561/18128/11981/19349/16522/14678/12314/11486/18754/56013/545156/18767/215449/11419/52055/228355/13121/110279/67151/56717/20983/56437/67767/109905/76273
GO:0009067	GO:0009067	aspartate family amino acid biosynthetic process	10	0.543453	1.48538	0.102703	0.477212	0.429703	519	tags=30%, list=7%, signal=28%	27053/17769/67873
GO:0008217	GO:0008217	regulation of blood pressure	57	0.311453	1.317	0.102662	0.477212	0.429703	587	tags=21%, list=8%, signal=20%	14456/230899/13388/52589/20112/78286/15368/66259/15937/20656/14672/74840
GO:0008277	GO:0008277	regulation of G protein-coupled receptor signaling pathway	52	-0.369082	-1.34085	0.102842	0.477334	0.429813	602	tags=19%, list=8%, signal=18%	244585/12323/105171/239217/230857/18577/11555/54409/13429/207474
GO:0016925	GO:0016925	protein sumoylation	28	0.396874	1.4549	0.10303	0.477602	0.430054	1543	tags=43%, list=21%, signal=34%	66568/13653/13654/12418/68350/22196/20610/22218/170930/19387/12387/50995
GO:0017158	GO:0017158	regulation of calcium ion-dependent exocytosis	22	0.425085	1.45041	0.103125	0.477602	0.430054	985	tags=41%, list=13%, signal=36%	80976/19339/22249/18128/14678/13446/215449/20983/171180
GO:0050873	GO:0050873	brown fat cell differentiation	19	0.455963	1.51198	0.103424	0.477965	0.430381	460	tags=32%, list=6%, signal=30%	12608/384061/13592/94187/23921/14077
GO:0051957	GO:0051957	positive regulation of amino acid transport	14	0.468496	1.43138	0.103542	0.477965	0.430381	18	tags=7%, list=0%, signal=7%	14812
GO:1905564	GO:1905564	positive regulation of vascular endothelial cell proliferation	13	0.485033	1.43026	0.103542	0.477965	0.430381	80	tags=15%, list=1%, signal=15%	16002/20848
GO:1903305	GO:1903305	regulation of regulated secretory pathway	67	0.309903	1.33494	0.103751	0.478409	0.43078	1030	tags=27%, list=14%, signal=23%	230899/14299/80976/15368/19339/22249/171580/12290/18128/12048/14678/13446/242662/215449/110279/20983/171180/109905
GO:0034381	GO:0034381	plasma lipoprotein particle clearance	10	0.542681	1.48327	0.105405	0.485507	0.437172	58	tags=20%, list=1%, signal=20%	100102/22359
GO:0043116	GO:0043116	negative regulation of vascular permeability	11	-0.572321	-1.44804	0.106349	0.488261	0.439651	1433	tags=64%, list=19%, signal=51%	11600/19271/14815/27494/54611/11816/54409
GO:0042596	GO:0042596	fear response	22	0.422131	1.44033	0.10625	0.488261	0.439651	104	tags=18%, list=1%, signal=18%	14812/11516/20510/18013
GO:0050680	GO:0050680	negative regulation of epithelial cell proliferation	62	0.307074	1.31794	0.106299	0.488261	0.439651	95	tags=5%, list=1%, signal=5%	16392/56312/12577
GO:0006820	GO:0006820	monoatomic anion transport	51	-0.365746	-1.32935	0.106469	0.488281	0.43967	1361	tags=33%, list=18%, signal=27%	107723/12257/15275/20512/235504/100604/20511/54403/320091/20535/140919/14403/57138/72961/14399/14394/18669
GO:1903421	GO:1903421	regulation of synaptic vesicle recycling	24	-0.440911	-1.3763	0.106725	0.488631	0.439985	1372	tags=42%, list=18%, signal=34%	94190/66616/74006/14169/56216/19057/103967/26875/72961/13429
GO:0050709	GO:0050709	negative regulation of protein secretion	41	-0.39162	-1.35809	0.106892	0.488631	0.439985	1073	tags=24%, list=14%, signal=21%	15107/20377/17470/20787/56458/18007/11747/11816/16159/26950
GO:0006811	GO:0006811	monoatomic ion transport	426	-0.246507	-1.18964	0.10687	0.488631	0.439985	1516	tags=26%, list=20%, signal=22%	229725/72160/238871/246198/23797/13400/72258/66972/238161/74006/24012/107723/20866/12257/641376/216829/14467/67126/14169/15275/20530/74610/12300/242443/20512/22393/12767/19057/21808/16410/13057/235504/83674/94178/58234/100604/65973/12856/15512/226139/20511/110862/54403/14802/320091/20516/81904/18441/19165/103098/16498/69563/22782/211468/80297/98741/12298/53881/16438/11941/20535/12323/14609/110893…
GO:0010543	GO:0010543	regulation of platelet activation	14	-0.529808	-1.43841	0.107087	0.488724	0.440068	182	tags=29%, list=2%, signal=28%	11816/11555/18761/14726
GO:0048679	GO:0048679	regulation of axon regeneration	20	-0.473489	-1.41457	0.107143	0.488724	0.440068	1142	tags=35%, list=15%, signal=30%	269473/16001/14824/65079/18007/19211/18213
GO:1903429	GO:1903429	regulation of cell maturation	11	0.524731	1.47592	0.107527	0.489948	0.44117	161	tags=18%, list=2%, signal=18%	230126/71751
GO:1901031	GO:1901031	regulation of response to reactive oxygen species	18	0.426446	1.41161	0.107649	0.489975	0.441195	491	tags=17%, list=7%, signal=16%	230784/209027/78688
GO:0003015	GO:0003015	heart process	94	0.274969	1.25743	0.108225	0.49207	0.443081	203	tags=7%, list=3%, signal=7%	16392/668940/230899/20510/16511/54352/20112
GO:0071354	GO:0071354	cellular response to interleukin-6	16	0.444547	1.4195	0.108635	0.492535	0.4435	201	tags=19%, list=3%, signal=18%	20848/14388/240690
GO:0031338	GO:0031338	regulation of vesicle fusion	21	0.419892	1.41772	0.108761	0.492535	0.4435	962	tags=29%, list=13%, signal=25%	12721/12890/19339/13446/16573/20983
GO:0009948	GO:0009948	anterior/posterior axis specification	21	-0.457809	-1.38359	0.108793	0.492535	0.4435	1443	tags=43%, list=19%, signal=35%	218850/15376/226352/18424/16869/68151/15213/14734/22418
GO:0021987	GO:0021987	cerebral cortex development	67	0.30651	1.32033	0.108721	0.492535	0.4435	805	tags=22%, list=11%, signal=20%	67749/22151/16975/59058/18795/16870/13193/18212/13649/57752/67254/12569/70223/73710/19699
GO:0098754	GO:0098754	detoxification	30	-0.425287	-1.38218	0.10917	0.493716	0.444563	1653	tags=40%, list=22%, signal=31%	18024/14866/14088/11669/26357/140742/22782/14862/17250/17751/226781/18669
GO:0007416	GO:0007416	synapse assembly	102	-0.315907	-1.28965	0.109961	0.496762	0.447306	1079	tags=25%, list=14%, signal=22%	399558/50791/243725/58234/103967/17762/227580/13631/73728/74762/18208/26875/19211/13643/13048/17260/320840/76965/18191/16180/18213/331461/13841/19249/14394/22418
GO:0032006	GO:0032006	regulation of TOR signaling	62	0.303359	1.30199	0.110236	0.497473	0.447947	198	tags=6%, list=3%, signal=6%	11989/230784/14456/77976
GO:2000050	GO:2000050	regulation of non-canonical Wnt signaling pathway	12	-0.547644	-1.43876	0.11042	0.497756	0.448201	1060	tags=42%, list=14%, signal=36%	20377/68259/380718/14734/22418
GO:0031641	GO:0031641	regulation of myelination	29	0.37913	1.39915	0.110769	0.497756	0.448201	960	tags=24%, list=13%, signal=21%	15208/13654/19242/18053/22041/20203/56717
GO:0042552	GO:0042552	myelination	80	0.284857	1.26119	0.110656	0.497756	0.448201	661	tags=19%, list=9%, signal=17%	15208/66190/12805/21367/18810/50913/13654/76960/269116/70031/18212/19242/18053/13823/22041
GO:0003205	GO:0003205	cardiac chamber development	80	0.281787	1.2476	0.110656	0.497756	0.448201	368	tags=10%, list=5%, signal=10%	16392/18996/22761/66993/15205/16007/16911/21380
GO:0032611	GO:0032611	interleukin-1 beta production	30	0.389531	1.43019	0.111111	0.498763	0.449108	401	tags=13%, list=5%, signal=13%	16392/20848/16007/13653
GO:0051349	GO:0051349	positive regulation of lyase activity	15	0.452673	1.41221	0.111717	0.499891	0.450123	630	tags=33%, list=8%, signal=31%	11516/15444/210044/14297/109305
GO:0030330	GO:0030330	DNA damage response, signal transduction by p53 class mediator	34	0.354177	1.35631	0.111486	0.499891	0.450123	1232	tags=26%, list=17%, signal=22%	230784/12575/59092/20677/15258/26572/17319/66143/18148
GO:0098655	GO:0098655	monoatomic cation transmembrane transport	265	-0.265948	-1.22455	0.111628	0.499891	0.450123	867	tags=18%, list=12%, signal=17%	15512/226139/110862/54403/81904/19165/103098/16498/69563/22782/211468/98741/12298/16438/11941/110893/15168/13483/19211/27416/226025/74777/18760/110784/74051/16531/72392/11932/110876/14167/432442/12289/16439/66237/57138/16497/11555/72961/57816/13405/170738/14813/98660/238271/226781/18823/12296/72821/20266
