# Supplementary material for: PTEN restrains SHH medulloblastoma growth through cell autonomous and nonautonomous mechanisms
Source: eLife. 2026 Apr 17;14:RP108190. doi: 10.7554/eLife.108190 (PMC13090030; doi:10.7554/eLife.108190)
Supplement: Figure 9—figure supplement 1—source data 3. — Related to Figure 9—figure supplement 1C. [file elife-108190-fig9-figsupp1-data3.xlsx]

## Sheet: Figure 9-Supp 1-source data 3
Figure 9-Supplemental 1-source data 3. GSEA analysis of Gene Ontology terms of DEG gene list in early GC-like (cluster 1) compared with GCP-like (clusters 3, 4, 8) of SmoM2; Ptenfl/fl tumors. Related to Figure 9-Supplemental 1C.
GO terms	ONTOLOGY	ID	Description	setSize	enrichmentScore	NES	pvalue	p.adjust	qvalue	rank	leading_edge	core_enrichment
GO:0001505	BP	GO:0001505	regulation of neurotransmitter levels	123	0.591228	2.81912	1e-10	4.16857e-09	2.85639e-09	1722	tags=59%, list=20%, signal=48%	110834/18574/19339/64051/11419/20616/14395/327814/27204/20974/18212/207227/18479/20977/20979/18189/116837/56216/18190/27062/26875/18191/20964/22318/268860/18751/20910/12361/14251/19276/12290/16504/140919/12298/108030/76787/242662/229521/72194/12889/17957/12287/381979/18645/76306/20980/104015/20617/22249/64176/12048/320405/22433/192167/59033/20614/243328/14299/269642/65106/382018/26431/72961/18750…
GO:0006836	BP	GO:0006836	neurotransmitter transport	116	0.60029	2.8133	1e-10	4.16857e-09	2.85639e-09	1722	tags=61%, list=20%, signal=50%	110834/19339/64051/11419/20616/14395/327814/27204/20974/18212/207227/18479/20977/20979/18189/116837/56216/18190/27062/26875/18191/20964/21366/22318/18751/20910/12361/14251/19276/12290/16504/140919/12298/108030/76787/242662/229521/72194/12889/17957/12287/381979/18645/76306/20980/104015/20617/22249/64176/12048/320405/22433/192167/59033/20614/243328/14299/269642/65106/382018/26431/72961/18750/20743/…
GO:0007269	BP	GO:0007269	neurotransmitter secretion	97	0.606771	2.74949	1e-10	4.16857e-09	2.85639e-09	1722	tags=62%, list=20%, signal=50%	110834/19339/64051/11419/20616/327814/27204/18212/207227/18479/20977/20979/18189/116837/56216/18190/27062/26875/18191/20964/22318/18751/20910/12361/19276/12290/16504/12298/108030/76787/242662/229521/72194/12889/17957/12287/381979/18645/20980/104015/20617/22249/64176/12048/320405/22433/192167/59033/20614/14299/382018/26431/18750/20743/67808/111173/213760/60510/67474/12286
GO:0099643	BP	GO:0099643	signal release from synapse	97	0.606771	2.74949	1e-10	4.16857e-09	2.85639e-09	1722	tags=62%, list=20%, signal=50%	110834/19339/64051/11419/20616/327814/27204/18212/207227/18479/20977/20979/18189/116837/56216/18190/27062/26875/18191/20964/22318/18751/20910/12361/19276/12290/16504/12298/108030/76787/242662/229521/72194/12889/17957/12287/381979/18645/20980/104015/20617/22249/64176/12048/320405/22433/192167/59033/20614/14299/382018/26431/18750/20743/67808/111173/213760/60510/67474/12286
GO:0006261	BP	GO:0006261	DNA-templated DNA replication	123	-0.794653	-2.67811	1e-10	4.16857e-09	2.85639e-09	1033	tags=61%, list=12%, signal=55%	66979/21681/12545/217578/17535/19718/225182/98415/19360/18148/71567/69263/22427/60364/27354/18972/69270/117599/67967/17220/18969/19076/12144/106344/72151/18971/272551/226409/235559/72749/78833/66131/18538/20133/237877/12190/21853/69928/18968/79456/214901/218973/22036/16881/17217/27214/212377/77782/327762/12447/19075/17216/67177/18973/18974/17218/268465/19361/12566/12021/52679/72107/18392/12189/20…
GO:0007612	BP	GO:0007612	learning	94	0.584576	2.63711	1e-10	4.16857e-09	2.85639e-09	1297	tags=45%, list=15%, signal=38%	14812/21367/319984/18574/11419/234593/232975/353342/18013/15572/18212/22142/18479/18189/18190/18191/11444/243961/98388/58234/27403/17754/12288/110891/12290/60597/229521/545156/14168/101489/14810/381979/15357/13844/19699/18163/108012/104015/20238/195018/20614/11820
GO:0098813	BP	GO:0098813	nuclear chromosome segregation	249	-0.743864	-2.61933	1e-10	4.16857e-09	2.85639e-09	1031	tags=45%, list=12%, signal=41%	59014/21749/70681/72117/17350/72787/67139/223921/52683/72057/17535/214444/73420/18226/76915/78658/19357/114714/11920/19384/68298/26934/66993/381678/70799/70891/74335/30939/234094/12190/69928/66934/19183/71846/69716/70099/16580/12447/67177/83815/56150/215387/110033/327799/60411/268465/16319/76044/14211/228421/21335/56742/68014/14841/12704/20878/100502766/72107/50883/72415/209334/12448/70385/51944/…
GO:0000280	BP	GO:0000280	nuclear division	288	-0.734111	-2.59729	1e-10	4.16857e-09	2.85639e-09	1031	tags=45%, list=12%, signal=41%	59014/21749/70681/72117/64707/17350/72787/77891/67139/223921/52683/17535/214444/73420/18226/76915/78658/19357/114714/19385/98733/71943/11920/19384/68298/100088/26934/12577/381678/70799/70891/74335/105837/235559/30939/234094/12190/69928/66934/19183/71846/214901/12531/69716/67121/17864/70099/67203/77744/16580/60530/12447/67177/56150/215387/110033/327799/60411/268465/14087/16319/76044/19361/14211/22…
GO:0007059	BP	GO:0007059	chromosome segregation	328	-0.730248	-2.59083	1e-10	4.16857e-09	2.85639e-09	1045	tags=43%, list=12%, signal=39%	225745/59014/21749/70681/72117/17350/72787/67139/223921/52683/72057/17535/21975/214444/73420/18226/76915/219103/78658/19357/114714/22038/11920/19384/68298/66140/230376/100088/71909/66578/26934/66993/381678/76123/70799/70891/69736/74335/58186/30939/381280/234094/12190/69928/66934/19183/71846/214901/66311/69716/70099/219072/67203/16580/12447/67177/83815/56150/215387/110033/327799/60411/70645/268465…
GO:0140013	BP	GO:0140013	meiotic nuclear division	110	-0.773711	-2.58872	1e-10	4.16857e-09	2.85639e-09	1016	tags=55%, list=12%, signal=50%	21749/64707/17350/72787/52683/17535/76915/78658/114714/11920/381678/70891/235559/30939/12190/69928/19183/71846/214901/12531/69716/67121/17864/70099/60530/12447/215387/268465/14087/16319/19361/14211/228421/66197/623474/14841/19362/20878/19366/72415/12448/107995/67141/68549/105988/22137/18817/12442/66977/211651/12236/11799/229841/22417/237911/12235/12316/67052/234396/21973/14609
GO:0000070	BP	GO:0000070	mitotic sister chromatid segregation	158	-0.753516	-2.5883	1e-10	4.16857e-09	2.85639e-09	1031	tags=49%, list=12%, signal=44%	59014/70681/72117/67139/223921/52683/214444/73420/18226/78658/19357/11920/19384/68298/26934/70799/74335/30939/234094/66934/69716/70099/16580/67177/56150/215387/110033/327799/60411/16319/76044/14211/228421/56742/68014/14841/12704/100502766/72107/50883/72415/209334/70385/51944/381318/54141/67849/107995/17865/18005/67141/208628/52276/71819/105988/22137/18817/67629/66442/66977/233406/12236/11799/2097…
GO:1903046	BP	GO:1903046	meiotic cell cycle process	122	-0.765289	-2.58423	1e-10	4.16857e-09	2.85639e-09	1016	tags=53%, list=12%, signal=48%	21749/64707/17350/72787/15574/52683/17535/19360/76915/78658/114714/11920/68298/381678/70891/235559/30939/12190/69928/19183/71846/214901/12531/69716/67121/17864/70099/60530/12447/215387/268465/14087/16319/19361/14211/228421/66197/623474/14841/19362/20878/19366/72415/12532/12448/107995/67141/68549/105988/22137/18817/12442/66977/211651/12236/11799/229841/22417/237911/12235/12316/67052/234396/21973/1…
GO:0051321	BP	GO:0051321	meiotic cell cycle	152	-0.751262	-2.57664	1e-10	4.16857e-09	2.85639e-09	1016	tags=49%, list=12%, signal=44%	21749/64707/17350/72787/15574/52683/17535/225182/19360/76915/78658/114714/27354/11920/68298/381678/68275/70891/235559/30939/12190/69928/12427/19183/71846/214901/12531/16848/69716/67121/17864/70099/60530/12447/215387/268465/14087/17427/16319/19361/14211/12566/228421/66197/623474/14841/19362/20878/19366/72415/12532/12448/107995/18005/67141/68549/105988/26909/22137/18817/12442/66977/211651/12236/117…
GO:0000819	BP	GO:0000819	sister chromatid segregation	197	-0.735605	-2.56513	1e-10	4.16857e-09	2.85639e-09	941	tags=42%, list=11%, signal=38%	67139/223921/52683/72057/214444/73420/18226/78658/19357/114714/11920/19384/68298/26934/66993/70799/74335/30939/234094/66934/69716/70099/16580/67177/56150/215387/110033/327799/60411/16319/76044/14211/228421/21335/56742/68014/14841/12704/100502766/72107/50883/72415/209334/70385/51944/381318/54141/68612/67849/107995/17865/18005/67141/208628/52276/71819/68549/223970/105988/22137/18817/67629/66442/669…
GO:0140014	BP	GO:0140014	mitotic nuclear division	207	-0.732311	-2.56313	1e-10	4.16857e-09	2.85639e-09	1052	tags=45%, list=12%, signal=40%	16002/59014/70681/72117/77891/67139/223921/52683/214444/73420/18226/78658/19357/19385/98733/71943/11920/19384/68298/100088/26934/12577/70799/74335/105837/30939/234094/66934/69716/70099/67203/77744/16580/67177/56150/215387/110033/327799/60411/16319/76044/14211/228421/12649/56742/68014/14841/12704/240641/20878/100502766/72107/50883/72415/209334/70385/51944/381318/54141/68612/67849/107995/17865/1800…
GO:0051304	BP	GO:0051304	chromosome separation	69	-0.813305	-2.55108	1e-10	4.16857e-09	2.85639e-09	933	tags=61%, list=11%, signal=55%	52683/21975/214444/78658/19357/22038/11920/68298/70799/74335/69716/70099/67177/56150/215387/327799/16319/76044/14211/68014/14841/209334/70385/107995/67141/208628/52276/105988/22137/18817/67629/66442/66977/12236/11799/268697/229841/12235/20877/67052/54392/21973
GO:0007093	BP	GO:0007093	mitotic cell cycle checkpoint signaling	119	-0.756564	-2.54631	1e-10	4.16857e-09	2.85639e-09	940	tags=50%, list=11%, signal=45%	15574/17535/225182/214444/56190/19360/57913/17193/60364/27354/11920/54601/12144/18854/70799/74335/105837/235559/12575/66131/69716/19891/67177/56150/327799/268465/76843/16319/12021/12649/68014/14841/50883/18392/12189/209334/70385/20460/107995/77011/208628/52276/12443/22137/18817/67629/66442/66977/211651/23834/12236/11799/268697/12534/229841/269582/12235/20877/67052
GO:0090068	BP	GO:0090068	positive regulation of cell cycle process	169	-0.736913	-2.54525	1e-10	4.16857e-09	2.85639e-09	869	tags=42%, list=10%, signal=39%	18226/18148/219103/16906/78658/19357/114714/19385/22038/68298/26934/66993/76123/12445/74335/105837/58186/70235/18214/67628/20133/237877/14156/11504/12531/27214/70099/67177/19363/56150/20873/215387/76843/16319/76044/14211/52679/19362/12704/240641/20878/50883/18392/209334/12532/14632/20460/54141/68612/67849/13605/67141/52276/71819/12443/68549/20135/23834/11799/268697/12534/229841/108907/22417/71878…
GO:0051983	BP	GO:0051983	regulation of chromosome segregation	110	-0.760355	-2.54403	1e-10	4.16857e-09	2.85639e-09	933	tags=46%, list=11%, signal=42%	52683/72057/214444/78658/19357/22038/11920/68298/66993/70799/74335/58186/214901/69716/70099/67177/56150/215387/327799/16319/76044/14211/21335/68014/14841/12704/209334/70385/68612/107995/67141/208628/52276/223970/22137/18817/67629/66442/66977/23834/12236/11799/268697/229841/17345/73804/12235/20877/67052/54392/108912
GO:0045132	BP	GO:0045132	meiotic chromosome segregation	65	-0.814927	-2.53951	1e-10	4.16857e-09	2.85639e-09	1016	tags=65%, list=12%, signal=57%	21749/17350/72787/52683/17535/76915/78658/114714/11920/381678/70891/30939/12190/69928/19183/71846/69716/70099/12447/215387/268465/14211/14841/20878/72415/12448/67141/68549/105988/22137/18817/12442/66977/211651/12236/229841/237911/12235/12316/67052/234396/21973
GO:0006260	BP	GO:0006260	DNA replication	219	-0.725314	-2.5374	1e-10	4.16857e-09	2.85639e-09	1288	tags=51%, list=15%, signal=45%	56505/108689/11908/269400/18393/18029/19687/68240/22059/114741/74528/20833/319651/66979/21681/21749/12545/217578/17535/19718/225182/98415/19360/245688/18148/71567/69263/69724/66262/22427/60364/16332/27354/18972/27015/69270/117599/67967/50927/17220/68275/18969/19076/12144/106344/72151/18971/272551/226409/66634/235559/72749/78833/66131/18538/20133/237877/14156/12190/320209/21853/69928/18968/79456/2…
GO:0007127	BP	GO:0007127	meiosis I	68	-0.806893	-2.52984	1e-10	4.16857e-09	2.85639e-09	1016	tags=60%, list=12%, signal=54%	21749/17350/72787/17535/76915/114714/11920/381678/70891/235559/30939/12190/69928/19183/71846/214901/12531/69716/17864/12447/268465/19361/66197/623474/14841/19362/20878/19366/12448/67141/68549/105988/18817/12442/211651/11799/229841/237911/67052/234396/21973
GO:0099504	BP	GO:0099504	synaptic vesicle cycle	153	0.524201	2.52773	1e-10	4.16857e-09	2.85639e-09	1887	tags=57%, list=22%, signal=45%	19339/64051/69938/20616/327814/27204/16443/72685/207227/100503185/20977/20979/18189/116837/103967/56216/12569/23969/27062/26875/20964/22318/18751/20910/12361/216856/11975/20404/12290/140919/12298/76787/242662/229521/72194/12889/17957/12287/94190/381979/12217/18645/11973/108012/20980/30948/104015/54411/20617/22249/64176/12048/320405/192167/18717/11972/59033/108664/20614/64933/14299/11465/11966/218…
GO:0051276	BP	GO:0051276	chromosome organization	424	-0.705241	-2.52606	1e-10	4.16857e-09	2.85639e-09	1106	tags=40%, list=13%, signal=37%	14056/26951/67241/103468/216853/14375/170762/59014/15289/21749/70681/72117/17350/22594/72787/20937/30877/244329/28113/67139/15574/223921/52683/72057/17535/21975/68147/214444/73420/18226/19360/71567/76915/78658/234344/22427/19357/114714/27354/11920/67733/19384/245474/69270/68298/51869/117599/13433/66578/26934/50927/66993/17220/381678/68275/12144/18854/17869/70799/70891/74335/272551/226409/66634/78…
GO:0061982	BP	GO:0061982	meiosis I cell cycle process	70	-0.804032	-2.51731	1e-10	4.16857e-09	2.85639e-09	1016	tags=60%, list=12%, signal=53%	21749/17350/72787/17535/76915/114714/11920/381678/70891/235559/30939/12190/69928/19183/71846/214901/12531/69716/17864/12447/268465/19361/66197/623474/14841/19362/20878/19366/12532/12448/67141/68549/105988/18817/12442/211651/11799/229841/237911/67052/234396/21973
GO:1905818	BP	GO:1905818	regulation of chromosome separation	62	-0.813897	-2.51315	1e-10	4.16857e-09	2.85639e-09	933	tags=63%, list=11%, signal=57%	52683/214444/78658/19357/22038/11920/68298/70799/74335/69716/70099/67177/56150/215387/327799/16319/76044/14211/68014/14841/209334/70385/107995/67141/208628/52276/22137/18817/67629/66442/66977/12236/11799/268697/229841/12235/20877/67052/54392
GO:0031577	BP	GO:0031577	spindle checkpoint signaling	48	-0.833183	-2.51018	1e-10	4.16857e-09	2.85639e-09	589	tags=60%, list=7%, signal=57%	70799/74335/105837/69716/67177/56150/327799/16319/68014/14841/20878/209334/70385/20460/107995/208628/52276/22137/18817/67629/66442/66977/12236/11799/268697/229841/12235/20877/67052
GO:0000075	BP	GO:0000075	cell cycle checkpoint signaling	154	-0.730796	-2.51007	1e-10	4.16857e-09	2.85639e-09	940	tags=42%, list=11%, signal=38%	15574/17535/225182/214444/56190/19360/57913/17193/60364/27354/11920/54601/12144/18854/70799/74335/105837/235559/12575/66131/12190/21853/241627/69716/327762/19891/67177/56150/327799/268465/76843/16319/19361/12021/12649/68014/14841/20878/50883/18392/12189/209334/70385/20460/107995/77011/208628/52276/12443/22137/18817/67629/66442/66977/211651/23834/12236/11799/268697/12534/229841/269582/12235/20877/…
GO:1901991	BP	GO:1901991	negative regulation of mitotic cell cycle phase transition	135	-0.735064	-2.49882	1e-10	4.16857e-09	2.85639e-09	940	tags=46%, list=11%, signal=42%	15574/17535/225182/214444/56190/19360/57913/17193/19357/60364/27354/11920/54601/69274/12144/18854/70799/74335/227292/235559/12575/12193/69716/269424/19891/67177/19650/56150/327799/76843/16319/12021/12649/68014/14841/52679/18392/12189/209334/70385/107995/67141/77011/208628/52276/12443/22137/18817/67629/66442/66977/23834/12236/11799/268697/12534/229841/269582/12235/20877/67052/12192
GO:0007088	BP	GO:0007088	regulation of mitotic nuclear division	77	-0.786445	-2.49627	1e-10	4.16857e-09	2.85639e-09	891	tags=53%, list=10%, signal=48%	214444/18226/19357/98733/71943/11920/100088/70799/74335/105837/69716/77744/67177/56150/327799/16319/12649/68014/14841/240641/209334/70385/107995/67141/208628/52276/22137/18817/67629/66442/66977/12236/11799/268697/229841/17345/108907/12235/20877/67052/108912
GO:0045839	BP	GO:0045839	negative regulation of mitotic nuclear division	50	-0.822993	-2.49533	1e-10	4.16857e-09	2.85639e-09	794	tags=64%, list=9%, signal=58%	19357/71943/11920/70799/74335/105837/69716/67177/56150/327799/16319/12649/68014/14841/209334/70385/107995/67141/208628/52276/22137/18817/67629/66442/66977/12236/11799/268697/229841/12235/20877/67052
GO:0048285	BP	GO:0048285	organelle fission	323	-0.70306	-2.49005	1e-10	4.16857e-09	2.85639e-09	1031	tags=40%, list=12%, signal=37%	59014/21749/70681/72117/64707/17350/72787/77891/67139/223921/52683/17535/214444/73420/18226/76915/78658/19357/114714/19385/98733/71943/11920/19384/68298/100088/26934/12577/381678/70799/70891/74335/105837/235559/30939/234094/12190/69928/66934/19183/71846/214901/12531/69716/67121/17864/70099/67203/77744/16580/60530/12447/67177/56150/215387/110033/327799/60411/268465/14087/16319/76044/19361/14211/22…
GO:0071174	BP	GO:0071174	mitotic spindle checkpoint signaling	45	-0.836207	-2.4872	1e-10	4.16857e-09	2.85639e-09	589	tags=62%, list=7%, signal=58%	70799/74335/105837/69716/67177/56150/327799/16319/68014/14841/209334/70385/20460/107995/208628/52276/22137/18817/67629/66442/66977/12236/11799/268697/229841/12235/20877/67052
GO:0007094	BP	GO:0007094	mitotic spindle assembly checkpoint signaling	43	-0.830827	-2.47067	1e-10	4.16857e-09	2.85639e-09	589	tags=63%, list=7%, signal=59%	11920/70799/74335/69716/67177/56150/327799/16319/68014/14841/209334/70385/107995/208628/52276/22137/18817/67629/66442/66977/12236/11799/268697/229841/12235/20877/67052
GO:0071173	BP	GO:0071173	spindle assembly checkpoint signaling	43	-0.830827	-2.47067	1e-10	4.16857e-09	2.85639e-09	589	tags=63%, list=7%, signal=59%	11920/70799/74335/69716/67177/56150/327799/16319/68014/14841/209334/70385/107995/208628/52276/22137/18817/67629/66442/66977/12236/11799/268697/229841/12235/20877/67052
GO:0051985	BP	GO:0051985	negative regulation of chromosome segregation	47	-0.821838	-2.46925	1e-10	4.16857e-09	2.85639e-09	589	tags=64%, list=7%, signal=60%	19357/11920/70799/74335/214901/69716/67177/56150/327799/16319/68014/14841/209334/70385/107995/67141/208628/52276/22137/18817/67629/66442/66977/12236/11799/268697/229841/12235/20877/67052
GO:0045787	BP	GO:0045787	positive regulation of cell cycle	221	-0.704927	-2.46698	1e-10	4.16857e-09	2.85639e-09	869	tags=38%, list=10%, signal=35%	18226/18148/219103/16906/78658/27053/19357/114714/19385/22038/68298/26934/66993/76123/17869/12445/70891/74335/105837/58186/70235/18214/67628/20133/237877/18712/14156/12190/11504/12531/16848/27214/56312/70099/67177/19363/56150/20873/215387/76843/16319/76044/14211/12021/12649/56742/52679/19362/12704/240641/20878/50883/18392/12189/209334/12532/14632/13685/20460/54141/68612/67849/13605/67141/52276/71…
GO:0090329	BP	GO:0090329	regulation of DNA-templated DNA replication	44	-0.828297	-2.46639	1e-10	4.16857e-09	2.85639e-09	997	tags=68%, list=11%, signal=61%	12545/19718/18148/69263/60364/69270/17220/12144/106344/72151/272551/226409/78833/66131/18538/21853/214901/17217/27214/17216/67177/17218/12566/52679/72107/67141/77011/17219/17215/108961
GO:0051783	BP	GO:0051783	regulation of nuclear division	91	-0.761478	-2.46537	1e-10	4.16857e-09	2.85639e-09	891	tags=48%, list=10%, signal=44%	214444/18226/19357/98733/71943/11920/100088/70799/74335/105837/69716/77744/67177/56150/327799/16319/12649/68014/14841/19362/240641/209334/70385/107995/67141/208628/52276/22137/18817/67629/66442/66977/12236/11799/268697/229841/17345/108907/22417/12235/20877/67052/14609/108912
GO:1901988	BP	GO:1901988	negative regulation of cell cycle phase transition	193	-0.70519	-2.46156	1e-10	4.16857e-09	2.85639e-09	940	tags=39%, list=11%, signal=36%	15574/17535/225182/214444/56190/19360/57913/17193/19357/60364/27354/11920/54601/69274/12144/18854/70799/74335/105837/227292/235559/12575/66131/12193/12190/21853/241627/69716/269424/327762/19891/67177/19650/20674/56150/327799/268465/76843/16319/19361/12021/12649/68014/14841/52679/20878/50883/18392/12189/209334/70385/20460/107995/67141/77011/208628/52276/12443/22137/18817/67629/66442/66977/211651/2…
GO:0051784	BP	GO:0051784	negative regulation of nuclear division	52	-0.811427	-2.46142	1e-10	4.16857e-09	2.85639e-09	794	tags=62%, list=9%, signal=56%	19357/71943/11920/70799/74335/105837/69716/67177/56150/327799/16319/12649/68014/14841/209334/70385/107995/67141/208628/52276/22137/18817/67629/66442/66977/12236/11799/268697/229841/12235/20877/67052
GO:0010965	BP	GO:0010965	regulation of mitotic sister chromatid separation	51	-0.811375	-2.46104	1e-10	4.16857e-09	2.85639e-09	589	tags=59%, list=7%, signal=55%	214444/19357/11920/70799/74335/69716/67177/56150/327799/16319/68014/14841/209334/70385/107995/67141/208628/52276/22137/18817/67629/66442/66977/12236/11799/268697/229841/12235/20877/67052
GO:0099177	BP	GO:0099177	regulation of trans-synaptic signaling	313	0.459069	2.45806	1e-10	4.16857e-09	2.85639e-09	1691	tags=47%, list=19%, signal=39%	16728/14812/12794/110834/21367/60613/319984/13004/19339/107065/270190/18039/83397/231207/227120/268755/11419/13869/17762/73710/226180/211134/18762/18013/319924/327814/108013/68404/18795/18212/208922/207227/18479/14802/20977/20979/18189/14816/116837/260297/56216/232370/228836/18190/56320/432442/26875/18191/11444/20964/243961/18196/21366/72003/22318/58234/18751/20910/12361/17754/216856/170571/19165…
GO:0045930	BP	GO:0045930	negative regulation of mitotic cell cycle	168	-0.710991	-2.45376	1e-10	4.16857e-09	2.85639e-09	940	tags=43%, list=11%, signal=39%	15574/17535/225182/214444/56190/19360/57913/17193/19357/60364/12228/27354/71943/11920/54601/69274/12577/12144/18854/70799/74335/105837/227292/235559/12575/66131/12193/69716/269424/19891/67177/19650/56150/327799/268465/76843/16319/12021/12649/68014/14841/52679/50883/18392/12189/209334/70385/20460/107995/67141/77011/208628/52276/12443/22137/18817/67629/66442/66977/211651/23834/12236/14451/11799/268…
GO:0033046	BP	GO:0033046	negative regulation of sister chromatid segregation	45	-0.824515	-2.45242	1e-10	4.16857e-09	2.85639e-09	589	tags=67%, list=7%, signal=62%	214444/19357/11920/70799/74335/69716/67177/56150/327799/16319/68014/14841/209334/70385/107995/67141/208628/52276/22137/18817/67629/66442/66977/12236/11799/268697/229841/12235/20877/67052
GO:0033048	BP	GO:0033048	negative regulation of mitotic sister chromatid segregation	45	-0.824515	-2.45242	1e-10	4.16857e-09	2.85639e-09	589	tags=67%, list=7%, signal=62%	214444/19357/11920/70799/74335/69716/67177/56150/327799/16319/68014/14841/209334/70385/107995/67141/208628/52276/22137/18817/67629/66442/66977/12236/11799/268697/229841/12235/20877/67052
GO:0045841	BP	GO:0045841	negative regulation of mitotic metaphase/anaphase transition	45	-0.824515	-2.45242	1e-10	4.16857e-09	2.85639e-09	589	tags=67%, list=7%, signal=62%	214444/19357/11920/70799/74335/69716/67177/56150/327799/16319/68014/14841/209334/70385/107995/67141/208628/52276/22137/18817/67629/66442/66977/12236/11799/268697/229841/12235/20877/67052
GO:2000816	BP	GO:2000816	negative regulation of mitotic sister chromatid separation	45	-0.824515	-2.45242	1e-10	4.16857e-09	2.85639e-09	589	tags=67%, list=7%, signal=62%	214444/19357/11920/70799/74335/69716/67177/56150/327799/16319/68014/14841/209334/70385/107995/67141/208628/52276/22137/18817/67629/66442/66977/12236/11799/268697/229841/12235/20877/67052
GO:0033047	BP	GO:0033047	regulation of mitotic sister chromatid segregation	49	-0.811102	-2.45146	1e-10	4.16857e-09	2.85639e-09	589	tags=61%, list=7%, signal=57%	214444/19357/11920/70799/74335/69716/67177/56150/327799/16319/68014/14841/209334/70385/107995/67141/208628/52276/22137/18817/67629/66442/66977/12236/11799/268697/229841/12235/20877/67052
GO:1902100	BP	GO:1902100	negative regulation of metaphase/anaphase transition of cell cycle	46	-0.819473	-2.44134	1e-10	4.16857e-09	2.85639e-09	589	tags=65%, list=7%, signal=61%	214444/19357/11920/70799/74335/69716/67177/56150/327799/16319/68014/14841/209334/70385/107995/67141/208628/52276/22137/18817/67629/66442/66977/12236/11799/268697/229841/12235/20877/67052
GO:1905819	BP	GO:1905819	negative regulation of chromosome separation	46	-0.819473	-2.44134	1e-10	4.16857e-09	2.85639e-09	589	tags=65%, list=7%, signal=61%	214444/19357/11920/70799/74335/69716/67177/56150/327799/16319/68014/14841/209334/70385/107995/67141/208628/52276/22137/18817/67629/66442/66977/12236/11799/268697/229841/12235/20877/67052
GO:0070192	BP	GO:0070192	chromosome organization involved in meiotic cell cycle	37	-0.836374	-2.43754	1e-10	4.16857e-09	2.85639e-09	1016	tags=76%, list=12%, signal=67%	21749/17350/72787/52683/17535/19360/76915/78658/114714/11920/68298/381678/70891/19183/71846/69716/70099/12447/215387/19361/14211/14841/12448/68549/211651/12236/237911/12235
GO:0051306	BP	GO:0051306	mitotic sister chromatid separation	54	-0.800413	-2.43745	1e-10	4.16857e-09	2.85639e-09	933	tags=57%, list=11%, signal=52%	52683/214444/19357/11920/70799/74335/69716/67177/56150/327799/16319/68014/14841/209334/70385/107995/67141/208628/52276/22137/18817/67629/66442/66977/12236/11799/268697/229841/12235/20877/67052
GO:0010948	BP	GO:0010948	negative regulation of cell cycle process	221	-0.694211	-2.42948	1e-10	4.16857e-09	2.85639e-09	940	tags=38%, list=11%, signal=35%	15574/17535/225182/214444/56190/19360/18148/57913/17193/19357/60364/27354/71943/11920/54601/69274/12144/18854/70799/74335/105837/227292/235559/12575/66131/12193/12190/21853/79456/214901/241627/69716/269424/327762/19891/67177/19650/20674/56150/327799/268465/76843/16319/19361/12021/12649/68014/14841/52679/20878/100502766/50883/18392/12449/12189/209334/70385/20460/107995/18005/67141/77011/208628/522…
GO:0006270	BP	GO:0006270	DNA replication initiation	26	-0.899655	-2.41334	1e-10	4.16857e-09	2.85639e-09	641	tags=81%, list=7%, signal=75%	17220/18969/19076/235559/78833/18968/17217/12447/19075/17216/67177/17218/12566/18392/12448/12544/70024/77011/17219/17215/23834
GO:1902850	BP	GO:1902850	microtubule cytoskeleton organization involved in mitosis	125	-0.715335	-2.41194	1e-10	4.16857e-09	2.85639e-09	1012	tags=42%, list=12%, signal=37%	70681/75786/244329/223921/18541/214444/73420/18226/219103/102124/100088/26934/76123/70799/70235/234094/233064/67203/77744/16580/56150/72080/16319/26886/21335/56742/20878/100502766/50883/70385/20460/107995/17865/18005/52276/71819/18817/12615/66442/66977/233406/11799/209737/268697/229841/108907/72119/16571/20877/67052/16551/218977
GO:0033045	BP	GO:0033045	regulation of sister chromatid segregation	90	-0.741181	-2.40085	1e-10	4.16857e-09	2.85639e-09	794	tags=41%, list=9%, signal=38%	72057/214444/19357/11920/66993/70799/74335/69716/67177/56150/327799/16319/21335/68014/14841/12704/209334/70385/68612/107995/67141/208628/52276/223970/22137/18817/67629/66442/66977/23834/12236/11799/268697/229841/12235/20877/67052
GO:0051301	BP	GO:0051301	cell division	448	-0.668019	-2.39943	1e-10	4.16857e-09	2.85639e-09	1052	tags=35%, list=12%, signal=33%	16002/225745/67455/319651/17242/21749/75786/12545/227937/30877/77891/67139/14176/66616/225182/448987/73420/18226/22340/12571/13822/219103/13852/78658/19357/22339/22367/19206/67733/19384/68298/66140/100088/71909/66578/26934/26920/76123/12144/14678/17869/12445/69736/11853/17997/209012/66131/30939/72823/12193/12190/21853/69928/66934/54124/12427/71846/66311/12531/16881/67121/70099/219072/100182/67203…
GO:0007091	BP	GO:0007091	metaphase/anaphase transition of mitotic cell cycle	84	-0.750334	-2.39707	1e-10	4.16857e-09	2.85639e-09	928	tags=43%, list=11%, signal=39%	72057/214444/19357/11920/66993/70799/74335/69716/67177/56150/327799/16319/21335/68014/14841/12704/209334/70385/68612/107995/67141/208628/52276/22137/18817/67629/66442/66977/23834/12236/11799/268697/229841/12235/20877/67052
GO:0007052	BP	GO:0007052	mitotic spindle organization	101	-0.726351	-2.39624	1e-10	4.16857e-09	2.85639e-09	1012	tags=43%, list=12%, signal=38%	70681/75786/223921/18541/73420/18226/219103/100088/26934/76123/70799/70235/234094/233064/77744/16580/16319/26886/21335/56742/20878/100502766/50883/20460/107995/17865/18005/52276/71819/18817/66442/66977/233406/11799/209737/268697/229841/72119/16571/20877/67052/16551/218977
GO:1901976	BP	GO:1901976	regulation of cell cycle checkpoint	42	-0.807274	-2.39173	1e-10	4.16857e-09	2.85639e-09	565	tags=45%, list=6%, signal=43%	74335/12190/241627/19891/67177/56150/327799/16319/19361/12021/20878/50883/12189/209334/52276/11799/268697/20877/67052
GO:0051310	BP	GO:0051310	metaphase plate congression	56	-0.78346	-2.39137	1e-10	4.16857e-09	2.85639e-09	438	tags=41%, list=5%, signal=39%	12190/16580/67177/83815/110033/16319/228421/56742/100502766/70385/54141/67849/52276/66977/11799/268697/229841/108000/71878/381293/73804/20877/67052
GO:0030071	BP	GO:0030071	regulation of mitotic metaphase/anaphase transition	79	-0.749025	-2.38995	1e-10	4.16857e-09	2.85639e-09	928	tags=43%, list=11%, signal=39%	72057/214444/19357/11920/66993/70799/74335/69716/67177/56150/327799/16319/68014/14841/209334/70385/68612/107995/67141/208628/52276/22137/18817/67629/66442/66977/23834/12236/11799/268697/229841/12235/20877/67052
GO:0044839	BP	GO:0044839	cell cycle G2/M phase transition	118	-0.708784	-2.38915	1e-10	4.16857e-09	2.85639e-09	1012	tags=47%, list=12%, signal=43%	70681/12545/15574/17535/55982/225182/448987/19360/18148/17193/12571/16906/19357/60364/114714/27354/11920/54601/66993/18008/12144/235559/12575/21987/20133/237877/27401/12531/67121/19363/12578/76843/12566/12021/12649/12704/14235/50883/18392/12189/12532/67141/77011/12443/18817/12442/23834/12428/11799/268697/12534/269582/108000/381293/67052/18761
GO:0044784	BP	GO:0044784	metaphase/anaphase transition of cell cycle	85	-0.746491	-2.38875	1e-10	4.16857e-09	2.85639e-09	928	tags=42%, list=11%, signal=38%	72057/214444/19357/11920/66993/70799/74335/69716/67177/56150/327799/16319/21335/68014/14841/12704/209334/70385/68612/107995/67141/208628/52276/22137/18817/67629/66442/66977/23834/12236/11799/268697/229841/12235/20877/67052
GO:1901990	BP	GO:1901990	regulation of mitotic cell cycle phase transition	251	-0.675944	-2.38075	1e-10	4.16857e-09	2.85639e-09	940	tags=36%, list=11%, signal=33%	15574/12580/72057/17535/225182/214444/56190/19360/57913/17193/12571/219103/16906/19357/60364/114714/27354/11920/54601/69274/83383/66993/12577/12144/18854/12445/70799/74335/105837/227292/235559/12575/18214/67628/12193/20133/237877/11504/12531/69716/27214/269424/19891/67177/19363/19650/56150/327799/12578/76843/16319/12566/12021/12649/68014/14841/52679/18392/12189/209334/12532/70385/20460/68612/6784…
GO:0007051	BP	GO:0007051	spindle organization	150	-0.694116	-2.37843	1e-10	4.16857e-09	2.85639e-09	1045	tags=39%, list=12%, signal=35%	225745/70681/75786/17350/223921/18541/22350/73420/18226/219103/19385/230376/100088/71909/26934/74470/76123/70799/70235/234094/233064/219072/77744/16580/16319/26886/21335/56742/20878/100502766/50883/51944/20460/54141/107995/17865/18005/67141/52276/71819/105988/18817/12442/66442/66977/233406/11799/209737/268697/229841/72119/16571/20877/12316/67052/69885/16551/218977
GO:0000086	BP	GO:0000086	G2/M transition of mitotic cell cycle	105	-0.715735	-2.37781	1e-10	4.16857e-09	2.85639e-09	1012	tags=49%, list=12%, signal=43%	70681/12545/15574/17535/225182/448987/19360/17193/12571/16906/19357/60364/114714/27354/11920/54601/66993/18008/12144/235559/12575/21987/20133/27401/12531/67121/19363/12578/76843/12566/12021/12649/12704/14235/50883/18392/12189/12532/67141/77011/12443/18817/23834/12428/11799/268697/12534/269582/108000/381293/18761
GO:1902099	BP	GO:1902099	regulation of metaphase/anaphase transition of cell cycle	80	-0.744973	-2.37613	1e-10	4.16857e-09	2.85639e-09	928	tags=42%, list=11%, signal=38%	72057/214444/19357/11920/66993/70799/74335/69716/67177/56150/327799/16319/68014/14841/209334/70385/68612/107995/67141/208628/52276/22137/18817/67629/66442/66977/23834/12236/11799/268697/229841/12235/20877/67052
GO:0035825	BP	GO:0035825	homologous recombination	33	-0.833253	-2.37509	1e-10	4.16857e-09	2.85639e-09	976	tags=70%, list=11%, signal=62%	17350/17535/225182/19360/76915/114714/27354/235559/69928/19183/214901/69716/268465/19361/12021/623474/19362/19366/12189/211651/237911/234396/21973
GO:0006310	BP	GO:0006310	DNA recombination	208	-0.678522	-2.37093	1e-10	4.16857e-09	2.85639e-09	1407	tags=46%, list=16%, signal=40%	66362/20174/17685/104806/15510/71890/56505/226026/108689/269400/68240/14056/67241/216853/14375/58208/21681/15289/12545/17350/22594/70238/15574/17535/55982/225182/21975/98415/19360/71567/76915/22427/19357/114714/27354/17688/11920/237211/51869/117599/17220/381678/68275/224008/12144/57434/74335/272551/226409/66634/235559/58186/72749/233826/635253/237877/12190/21853/69928/79456/19183/214901/69716/168…
GO:2001251	BP	GO:2001251	negative regulation of chromosome organization	86	-0.738255	-2.36951	1e-10	4.16857e-09	2.85639e-09	1016	tags=47%, list=12%, signal=41%	21749/22594/28113/214444/19360/19357/27354/11920/18854/70799/74335/79456/69716/17216/67177/56150/327799/16319/68014/14841/209334/70385/107995/67141/208628/52276/22137/18817/67629/66442/66977/12236/11799/268697/229841/208084/12235/20877/67052/21973
GO:1901987	BP	GO:1901987	regulation of cell cycle phase transition	313	-0.668323	-2.367	1e-10	4.16857e-09	2.85639e-09	940	tags=35%, list=11%, signal=32%	15574/12580/72057/17535/55982/225182/214444/56190/19360/18148/57913/17193/12571/219103/16906/19357/60364/114714/27354/11920/54601/69274/83383/66993/12577/12144/18854/12445/70799/74335/105837/227292/235559/12575/18214/66131/67628/12193/20133/237877/17349/12190/21853/11504/241627/12531/69716/27214/269424/327762/19891/67177/19363/19650/20674/56150/327799/12578/268465/76843/16319/19361/12566/12021/12…
GO:0007080	BP	GO:0007080	mitotic metaphase plate congression	44	-0.794751	-2.3665	1e-10	4.16857e-09	2.85639e-09	324	tags=41%, list=4%, signal=40%	16580/67177/110033/16319/228421/56742/100502766/70385/67849/52276/66977/11799/268697/229841/381293/73804/20877/67052
GO:0045786	BP	GO:0045786	negative regulation of cell cycle	262	-0.670644	-2.36518	1e-10	4.16857e-09	2.85639e-09	965	tags=36%, list=11%, signal=33%	20937/15574/12580/17535/225182/214444/56190/19360/18148/57913/17193/12571/19357/60364/12228/27354/71943/11920/54601/69274/83383/12577/12144/216964/18854/70799/74335/105837/227292/235559/12575/66131/12193/12190/21853/79456/214901/241627/69716/56312/269424/327762/19891/67177/19650/20674/56150/327799/12578/268465/76843/16319/19361/12021/12649/68014/14841/52679/20878/100502766/50883/18392/12449/12189…
GO:0000724	BP	GO:0000724	double-strand break repair via homologous recombination	126	-0.700324	-2.36452	1e-10	4.16857e-09	2.85639e-09	1385	tags=50%, list=16%, signal=43%	20174/104806/71890/56505/226026/108689/269400/68240/67241/216853/12545/22594/15574/17535/225182/21975/98415/71567/22427/19357/114714/27354/11920/237211/51869/117599/17220/68275/224008/12144/57434/74335/272551/66634/72749/233826/635253/12190/21853/79456/17217/212377/77782/60530/19891/17216/19363/17218/19361/12649/623474/19362/19366/214763/75317/12189/209334/12544/223970/17219/17215/69885/234396
GO:0044772	BP	GO:0044772	mitotic cell cycle phase transition	338	-0.663998	-2.35771	1e-10	4.16857e-09	2.85639e-09	1106	tags=37%, list=13%, signal=34%	14056/26951/244879/50496/13559/319651/70681/12545/77891/15574/12580/72057/17535/225182/448987/214444/56190/19360/57913/17193/12571/219103/16906/19357/60364/114714/27354/11920/54601/69274/83383/100088/50927/66993/12577/18008/12144/18854/17869/12445/70799/70891/74335/105837/227292/235559/12575/18214/21987/67628/12193/20133/237877/27401/54124/12427/11504/12531/69716/67121/27214/269424/19891/12447/67…
GO:0045005	BP	GO:0045005	DNA-templated DNA replication maintenance of fidelity	43	-0.792667	-2.35719	1e-10	4.16857e-09	2.85639e-09	1028	tags=65%, list=12%, signal=58%	21681/17535/225182/98415/19360/71567/22427/60364/27354/12144/18971/226409/72749/66131/18538/12190/21853/69928/22036/212377/327762/18973/268465/19361/12021/12189/209334/107373
GO:0044770	BP	GO:0044770	cell cycle phase transition	400	-0.657948	-2.35612	1e-10	4.16857e-09	2.85639e-09	1106	tags=36%, list=13%, signal=33%	14056/107503/26951/244879/50496/13559/319651/70681/12545/77891/15574/12580/72057/17535/55982/225182/448987/214444/56190/19360/18148/57913/17193/12571/219103/16906/19357/60364/114714/27354/11920/54601/69274/83383/100088/50927/66993/12577/18008/12144/18854/17869/12445/70799/70891/74335/105837/227292/235559/12575/18214/21987/66131/67628/12193/20133/237877/27401/17349/12190/21853/54124/12427/11504/24…
GO:0006275	BP	GO:0006275	regulation of DNA replication	107	-0.705529	-2.3539	1e-10	4.16857e-09	2.85639e-09	1037	tags=42%, list=12%, signal=38%	319651/21749/12545/217578/19718/98415/18148/69263/66262/60364/16332/69270/17220/12144/106344/72151/272551/226409/78833/66131/18538/237877/21853/214901/17217/27214/269424/327762/17216/67177/17218/12566/14633/52679/72107/57441/14632/67141/77011/17219/17215/12428/12534/108961/71988
GO:0000725	BP	GO:0000725	recombinational repair	129	-0.694885	-2.35012	1e-10	4.16857e-09	2.85639e-09	1385	tags=50%, list=16%, signal=42%	20174/104806/71890/56505/226026/108689/269400/68240/67241/216853/14375/12545/22594/15574/17535/225182/21975/98415/71567/22427/19357/114714/27354/11920/237211/51869/117599/17220/68275/224008/12144/57434/74335/272551/66634/72749/233826/635253/12190/21853/79456/17217/212377/77782/60530/19891/17216/19363/17218/19361/12649/623474/19362/19366/214763/75317/12189/209334/12544/223970/17219/17215/69885/234…
GO:0051303	BP	GO:0051303	establishment of chromosome localization	63	-0.758896	-2.34953	1e-10	4.16857e-09	2.85639e-09	1092	tags=51%, list=13%, signal=45%	26951/59014/21749/17350/67139/18226/11920/70891/12190/67203/16580/67177/83815/110033/16319/228421/56742/100502766/70385/54141/67849/52276/66977/11799/268697/229841/108000/71878/381293/73804/20877/67052
GO:0033044	BP	GO:0033044	regulation of chromosome organization	210	-0.670459	-2.3436	1e-10	4.16857e-09	2.85639e-09	973	tags=31%, list=11%, signal=29%	22594/30877/244329/28113/72057/17535/214444/19360/234344/19357/27354/11920/245474/68298/13433/66993/18854/17869/70799/74335/14156/59125/79456/218973/69716/70099/17216/67177/56150/215387/327799/16319/14211/12566/21335/68014/14841/12704/209334/70385/68612/67849/107995/18005/67141/208628/52276/68549/223970/22137/18817/67629/66442/66977/23834/12236/11799/268697/229841/208084/12235/20877/67052/18761/5…
GO:0099003	BP	GO:0099003	vesicle-mediated transport in synapse	181	0.474267	2.34276	1e-10	4.16857e-09	2.85639e-09	2373	tags=64%, list=27%, signal=47%	19339/64051/69938/20616/327814/27204/26414/16443/72685/207227/100503185/20977/20979/18189/116837/103967/56216/12569/23969/27062/26875/20964/18196/22318/18751/20910/12361/216856/11975/20404/12290/238276/140919/12298/76787/242662/229521/72194/12889/17957/12287/94190/13642/381979/12217/18645/65945/11973/108012/20980/30948/104015/54411/20617/22249/64176/12048/320405/192167/18717/11972/59033/18693/108…
GO:0007346	BP	GO:0007346	regulation of mitotic cell cycle	340	-0.658632	-2.33823	1e-10	4.16857e-09	2.85639e-09	940	tags=34%, list=11%, signal=32%	15574/12580/72057/17535/225182/214444/56190/18226/19360/57913/17193/12571/219103/16906/27053/19357/60364/114714/98733/12228/27354/19206/71943/11920/54601/67874/69274/83383/100088/66993/12577/12144/18854/17869/12445/70799/74335/105837/227292/235559/12575/18214/66131/67628/12193/20133/237877/12190/59125/54124/11504/12531/69716/27214/269424/77744/19891/67177/19363/19650/56150/327799/12578/268465/768…
GO:0050000	BP	GO:0050000	chromosome localization	69	-0.742614	-2.32935	1e-10	4.16857e-09	2.85639e-09	1092	tags=46%, list=13%, signal=41%	26951/59014/21749/17350/67139/18226/11920/70891/12190/67203/16580/67177/83815/110033/16319/228421/56742/100502766/70385/54141/67849/52276/66977/11799/268697/229841/108000/71878/381293/73804/20877/67052
GO:0051383	BP	GO:0051383	kinetochore organization	21	-0.89272	-2.31884	1e-10	4.16857e-09	2.85639e-09	431	tags=67%, list=5%, signal=64%	69928/66311/70099/67177/60411/26886/14211/72155/208628/12615/66977/229841/67052/218977
GO:0010389	BP	GO:0010389	regulation of G2/M transition of mitotic cell cycle	82	-0.719272	-2.29938	1e-10	4.16857e-09	2.85639e-09	1012	tags=50%, list=12%, signal=45%	70681/12545/15574/17535/225182/19360/17193/12571/16906/19357/60364/114714/27354/11920/54601/66993/12144/235559/12575/20133/12531/19363/12578/76843/12566/12021/12649/18392/12189/12532/67141/77011/12443/18817/23834/268697/12534/269582/108000/381293/18761
GO:0051225	BP	GO:0051225	spindle assembly	96	-0.700012	-2.29588	1e-10	4.16857e-09	2.85639e-09	1045	tags=47%, list=12%, signal=42%	76478/232933/212514/231123/73738/20843/72776/225745/70681/17350/223921/73420/219103/230376/100088/71909/26934/76123/70799/234094/219072/16580/16319/20878/100502766/50883/20460/54141/107995/17865/18005/67141/52276/71819/18817/12442/233406/11799/209737/229841/72119/20877/12316/67052/16551
GO:1902749	BP	GO:1902749	regulation of cell cycle G2/M phase transition	91	-0.708092	-2.29253	1e-10	4.16857e-09	2.85639e-09	1334	tags=56%, list=15%, signal=48%	12530/69109/15512/67153/22059/28010/107503/70681/12545/15574/17535/55982/225182/19360/18148/17193/12571/16906/19357/60364/114714/27354/11920/54601/66993/12144/235559/12575/20133/237877/12531/19363/12578/76843/12566/12021/12649/18392/12189/12532/67141/77011/12443/18817/23834/268697/12534/269582/108000/381293/18761
GO:0034502	BP	GO:0034502	protein localization to chromosome	81	-0.716586	-2.29234	1e-10	4.16857e-09	2.85639e-09	1106	tags=43%, list=13%, signal=38%	14056/26951/216853/21749/30877/28113/67139/71567/19357/22367/245474/68275/224008/18854/70891/105837/66634/12190/19891/67177/83815/68014/14841/70385/67849/208628/22137/18817/12615/12236/12534/20877/67052/76464/71988
GO:0007611	BP	GO:0007611	learning or memory	167	0.462616	2.27459	1e-10	4.16857e-09	2.85639e-09	1895	tags=47%, list=22%, signal=38%	14812/53901/21367/319984/18574/11419/234593/17762/18762/232975/353342/18013/15572/21833/18795/18212/22142/238871/208922/18479/18189/260297/29813/18190/18191/11444/243961/98388/58234/56710/27403/17754/106763/110876/12288/19165/19122/110891/12290/60597/229521/545156/14168/101489/14810/381979/15357/13844/19699/12326/18163/108012/104015/50876/20238/12801/195018/20614/18508/11820/208117/382056/218038/…
GO:1901989	BP	GO:1901989	positive regulation of cell cycle phase transition	82	-0.70806	-2.26353	1e-10	4.16857e-09	2.85639e-09	855	tags=39%, list=10%, signal=36%	18148/219103/16906/114714/66993/12445/105837/18214/67628/20133/237877/11504/12531/27214/67177/19363/76843/20878/50883/12532/14632/20460/68612/67849/67141/12443/20135/11799/268697/12534/229841/71878
GO:0031570	BP	GO:0031570	DNA integrity checkpoint signaling	96	-0.685527	-2.24837	1e-10	4.16857e-09	2.85639e-09	1012	tags=41%, list=12%, signal=36%	19367/67153/22059/70681/15574/17535/56190/57913/17193/60364/27354/11920/54601/12144/18854/235559/12575/66131/12190/21853/241627/327762/19891/67177/268465/76843/19361/12021/12649/50883/18392/12189/77011/12443/18817/211651/23834/12534/269582
GO:0006302	BP	GO:0006302	double-strand break repair	222	-0.640745	-2.2432	1e-10	4.16857e-09	2.85639e-09	1385	tags=41%, list=16%, signal=35%	20174/17685/104806/71890/72612/56505/226026/108689/269400/55947/68240/22059/18294/104884/67241/11546/216853/14375/70681/12545/17350/22594/70238/15574/72057/17535/225182/21975/98415/19360/71567/22427/19357/114714/27354/11920/237211/51869/117599/66993/17220/381678/68275/224008/12144/57434/18854/74335/272551/66634/72749/233826/635253/110052/12190/21853/18968/79456/69716/16881/17217/212377/77782/3277…
GO:0006281	BP	GO:0006281	DNA repair	438	-0.620086	-2.22411	1e-10	4.16857e-09	2.85639e-09	1308	tags=36%, list=15%, signal=32%	71890/72612/56505/226026/108689/269400/14088/19367/68209/67153/19687/55947/68240/22059/114741/18294/104884/18950/74528/67241/20833/227099/11546/216853/14375/67872/15289/70681/12545/18207/17350/22594/20937/70238/15574/72057/17535/55982/19718/225182/21975/98415/19360/18148/71567/69263/17193/69724/22427/19357/114714/27354/18972/17688/11920/237211/27015/51869/14051/117599/67967/231642/66993/17220/381…
GO:0007098	BP	GO:0007098	centrosome cycle	116	-0.648063	-2.1781	1e-10	4.16857e-09	2.85639e-09	1442	tags=51%, list=17%, signal=43%	26425/99167/17245/76478/246102/212514/231123/101565/382406/73738/216846/236266/12387/70012/72776/107503/225745/75786/244329/207792/214444/18226/18148/219103/19385/18080/225659/338349/20501/230376/71909/74470/57434/230872/99100/70799/74335/70235/381644/234094/12190/233064/219072/67203/20873/12566/12649/20878/100502766/72415/12449/12189/209334/20460/18005/18817/68026/67052/16551
GO:0050890	BP	GO:0050890	cognition	185	0.443539	2.15703	1e-10	4.16857e-09	2.85639e-09	1910	tags=45%, list=22%, signal=36%	14812/53901/21367/319984/18574/11419/234593/17762/18762/232975/353342/18013/15572/21833/70028/18795/18212/22142/238871/208922/18479/109205/18189/260297/29813/18190/18191/11444/243961/98388/58234/56710/27403/17754/106763/110876/12288/19165/19122/110891/12290/60597/229521/545156/14168/101489/14810/381979/15357/13844/19699/12326/18163/108012/104015/50876/20238/12801/195018/20614/18508/11820/208117/3…
GO:0042391	BP	GO:0042391	regulation of membrane potential	228	0.413072	2.14989	1e-10	4.16857e-09	2.85639e-09	1547	tags=41%, list=18%, signal=35%	20269/14812/12794/108015/110834/71960/14226/16480/11419/56772/14395/17762/18762/232975/108058/16485/16526/108013/72258/98496/223604/18212/12176/14802/18189/116837/56216/64540/16522/211468/56320/432442/26875/11444/243961/58234/268860/109676/11735/216856/110876/57440/12288/13483/17131/14406/14806/110891/319504/60597/58802/12298/13052/52882/54393/16536/242662/14168/12293/12297/14810/81907/20191/1969…
GO:0140694	BP	GO:0140694	non-membrane-bounded organelle assembly	255	-0.587466	-2.06897	1e-10	4.16857e-09	2.85639e-09	1905	tags=42%, list=22%, signal=34%	13665/110109/66475/277939/22596/75547/56275/20104/50783/75617/11837/67832/51810/69902/13205/12261/67941/12633/259279/217011/319675/24061/18810/12617/67070/20085/17245/76478/16785/246102/232933/212514/67678/231123/101565/382406/73738/20843/235036/216846/29806/236266/72776/27041/225745/59014/17260/70681/17350/67139/223921/22350/214444/73420/18226/18148/219103/225659/230376/100088/71909/26934/74470/…
GO:0051052	BP	GO:0051052	regulation of DNA metabolic process	378	-0.578346	-2.06367	1e-10	4.16857e-09	2.85639e-09	1037	tags=28%, list=12%, signal=26%	319651/21681/15289/21749/70681/12545/17350/22594/20937/30877/70238/28113/72057/21781/217578/17535/55982/19718/225182/98415/19360/18148/69263/234344/66262/22427/22339/60364/16332/27354/17688/11920/237211/245474/69270/51869/14051/117599/13433/66578/66993/17220/381678/224008/19076/12144/18854/17869/106344/72151/272551/226409/58186/78833/12575/230484/635253/66131/18538/237877/110052/21853/59125/21490…
GO:0034220	BP	GO:0034220	monoatomic ion transmembrane transport	332	0.380465	2.00525	1e-10	4.16857e-09	2.85639e-09	1547	tags=34%, list=18%, signal=29%	241528/68312/20269/14812/269615/108015/320091/110834/12295/60613/18799/14226/12721/11419/14395/14419/232975/108058/98741/100503659/102566/16485/16526/72258/18795/223604/238871/14802/94249/100102/170770/14166/16519/16522/211468/109305/432442/11444/21366/22318/58234/16502/109676/11735/78506/279561/110876/12724/57440/12288/13483/19165/14406/11975/69106/19122/110891/12290/238276/16504/12298/83704/819…
GO:0098660	BP	GO:0098660	inorganic ion transmembrane transport	304	0.376486	1.98765	1e-10	4.16857e-09	2.85639e-09	1547	tags=34%, list=18%, signal=29%	241528/68312/20269/14812/269615/320091/12295/60613/18799/14226/12721/11419/14395/14419/232975/108058/98741/100503659/102566/16485/16526/72258/18795/223604/238871/94249/100102/170770/14166/16519/16522/211468/109305/432442/21366/22318/16502/109676/11735/78506/279561/110876/12724/57440/12288/13483/19165/14406/11975/69106/19122/110891/12290/238276/16504/12298/83704/81905/16536/14697/14168/12293/12287…
GO:0000226	BP	GO:0000226	microtubule cytoskeleton organization	429	-0.545118	-1.95206	1e-10	4.16857e-09	2.85639e-09	938	tags=28%, list=11%, signal=26%	70681/75786/17350/244329/56430/223921/18541/216274/207792/22350/214444/73420/227613/18226/109065/18148/17318/219103/102693/433956/19385/98733/18080/225659/338349/71924/66140/102124/20501/230376/100088/71909/26934/74470/26920/12695/12955/76123/57434/208177/230872/99100/70799/627872/109242/22143/74335/17997/17475/209012/70235/381644/72823/234094/12190/233064/219072/67203/77744/16580/56150/20873/720…
GO:0007276	BP	GO:0007276	gamete generation	293	-0.536979	-1.89877	1e-10	4.16857e-09	2.85639e-09	1376	tags=29%, list=16%, signal=25%	11517/17685/14453/14782/20535/14160/15512/28036/12593/236266/14088/83964/12387/69260/22059/270624/74360/17242/56449/64707/17350/72787/52683/53885/71567/53975/114714/53381/56693/11920/54004/65971/26934/54725/26920/381678/20682/70891/15361/67374/66634/58186/70235/12190/74041/12427/214901/11504/12531/69716/67121/17864/60530/17311/67030/104156/56296/215387/14087/20681/17427/19361/228421/224171/12704/…
GO:0008284	BP	GO:0008284	positive regulation of cell population proliferation	447	-0.521586	-1.87315	1e-10	4.16857e-09	2.85639e-09	1107	tags=26%, list=13%, signal=24%	18950/14056/18208/52615/53605/18263/16002/17242/11486/17260/19716/15289/12545/14176/16973/57295/11534/66190/14082/22340/18148/21872/14580/12571/22339/72007/68010/27354/20377/170799/12257/245474/16367/242748/13433/11677/66993/21815/68275/18008/12144/14678/18854/17869/12445/50887/20682/70891/11910/11987/15368/18213/12575/18214/14268/66131/67628/14595/237877/27401/18760/18712/79456/353156/11504/2138…
GO:0051588	BP	GO:0051588	regulation of neurotransmitter transport	65	0.624219	2.5171	1.32399e-10	5.3778e-09	3.68498e-09	1722	tags=63%, list=20%, signal=51%	110834/19339/11419/327814/20974/18212/207227/20977/20979/116837/56216/20964/18751/20910/12361/14251/12290/16504/12298/242662/72194/12889/12287/18645/20617/22249/64176/12048/192167/59033/14299/269642/65106/382018/26431/18750/67808/213760/14758/67474/12286
GO:0008608	BP	GO:0008608	attachment of spindle microtubules to kinetochore	37	-0.809989	-2.36064	1.32694e-10	5.3778e-09	3.68498e-09	438	tags=51%, list=5%, signal=49%	12190/67177/16319/72415/51944/54141/18005/13605/52276/67629/66442/66977/11799/268697/229841/73804/20877/67052/76464
GO:0031023	BP	GO:0031023	microtubule organizing center organization	128	-0.633436	-2.14192	1.37105e-10	5.51825e-09	3.78122e-09	1442	tags=48%, list=17%, signal=41%	99167/17245/76478/246102/232933/212514/231123/101565/382406/73738/216846/236266/12387/70012/72776/107503/225745/75786/244329/207792/214444/18226/18148/219103/19385/18080/225659/338349/20501/230376/71909/74470/12695/57434/230872/99100/70799/74335/17475/209012/70235/381644/234094/12190/233064/219072/67203/20873/12566/12649/20878/100502766/72415/12449/12189/209334/20460/18005/18817/68026/67052/16551
GO:0032392	BP	GO:0032392	DNA geometric change	44	-0.780111	-2.32291	1.43244e-10	5.72584e-09	3.92346e-09	1017	tags=55%, list=12%, signal=48%	15289/17535/19360/71567/22427/27354/69270/117599/17220/12144/272551/226409/66634/78833/320209/79456/17217/17216/17218/19361/12544/17219/17215/21973
GO:0044786	BP	GO:0044786	cell cycle DNA replication	30	-0.841207	-2.33628	1.44946e-10	5.75446e-09	3.94308e-09	791	tags=67%, list=9%, signal=61%	60364/69270/78833/18538/237877/12190/18968/16881/17217/27214/327762/17216/67177/19361/52679/12544/67141/17219/17215/108961
GO:0050806	BP	GO:0050806	positive regulation of synaptic transmission	99	0.539451	2.43673	1.81764e-10	7.07182e-09	4.84576e-09	1672	tags=56%, list=19%, signal=45%	14812/19339/107065/268755/13869/18762/18212/208922/18479/14802/20979/18189/116837/260297/56216/232370/11444/18196/22318/58234/20910/216856/14806/19122/14251/110891/238276/81905/242662/12287/14810/70441/13844/19699/65945/18412/56637/20617/12048/192167/13385/13643/59033/20614/14299/11820/14800/382056/233877/54377/382018/13649/19242/12323/68943
GO:0048609	BP	GO:0048609	multicellular organismal reproductive process	334	-0.509458	-1.80727	1.81091e-10	7.07182e-09	4.84576e-09	1469	tags=29%, list=17%, signal=25%	12041/14011/11545/67042/54650/11517/17685/14453/14782/20535/14160/17886/15512/28036/12593/20683/236266/14088/83964/12387/13653/69260/22059/270624/74360/11546/17242/11486/56449/64707/17350/72787/52683/53885/71567/53975/114714/53381/56693/11920/54004/65971/26934/54725/26920/381678/20682/70891/15361/67374/66634/58186/70235/14595/12190/74041/12427/214901/11504/12531/69716/67121/17864/60530/17311/6703…
GO:0023061	BP	GO:0023061	signal release	277	0.374978	1.96025	2.29236e-10	8.74394e-09	5.99153e-09	1726	tags=45%, list=20%, signal=37%	14427/110834/18799/14226/19339/64051/18012/17932/53627/11419/20616/14419/75605/19275/327814/27204/16443/18795/18212/207227/18479/20977/20979/18189/116837/20315/56216/224129/109689/16522/18190/20981/109305/27062/26875/18191/11444/20964/18642/22318/75770/268860/18751/93691/14681/20910/12361/68267/216856/12288/20394/68039/58994/19276/12290/14761/16504/18575/12298/108030/76787/54393/242662/20666/2295…
GO:0007409	BP	GO:0007409	axonogenesis	307	0.358838	1.90441	2.74541e-10	1.0404e-08	7.12906e-09	1481	tags=38%, list=17%, signal=33%	16728/71751/12904/19713/14432/50769/22152/21367/13638/269116/19649/11803/210801/19339/270190/18039/76884/16572/19277/26456/20616/17760/17762/73710/13193/22253/11785/170758/65254/20358/68404/17756/77630/17755/18212/18479/59058/18187/20315/12569/99512/56320/20359/22223/16574/18040/73991/11444/12386/75770/93691/18846/20910/110532/20355/11789/14567/17754/11735/114873/384569/360213/52666/14251/319504/…
GO:0050808	BP	GO:0050808	synapse organization	335	0.350163	1.86843	2.85413e-10	1.07463e-08	7.36357e-09	1917	tags=42%, list=22%, signal=34%	16728/233878/14812/14432/21367/269116/12295/13004/19339/55983/107065/270190/18039/19277/20450/20616/14395/13869/17762/56013/211134/18013/234267/11785/170758/327814/16443/18212/22142/18479/18187/18189/241514/260297/103967/12569/232370/18190/56320/26875/234214/18191/11444/20964/243961/12386/58234/12361/11735/216856/170571/19165/20411/14406/20404/19122/110891/230868/319504/238276/12298/76787/242662/…
GO:0046928	BP	GO:0046928	regulation of neurotransmitter secretion	58	0.635285	2.50223	3.43569e-10	1.2853e-08	8.80714e-09	1722	tags=62%, list=20%, signal=50%	110834/19339/11419/327814/18212/207227/20977/20979/116837/56216/20964/18751/20910/12361/12290/16504/12298/242662/72194/12889/12287/18645/20617/22249/64176/12048/192167/59033/14299/382018/26431/18750/67808/213760/67474/12286
GO:0050673	BP	GO:0050673	epithelial cell proliferation	223	-0.550762	-1.93043	3.7284e-10	1.38592e-08	9.4966e-09	1339	tags=30%, list=15%, signal=26%	110829/12530/18053/14160/12018/20683/236266/12387/67694/52615/16002/58208/17242/17260/15213/15289/28113/11534/22340/18148/12571/22339/68259/20377/19206/328949/12577/67486/17869/20682/15368/14595/18760/12190/353156/12010/21380/18129/56312/15117/16449/20674/20778/12608/21416/12578/14633/16776/17127/106795/97165/15208/18128/14632/18140/20319/12443/14451/11799/17345/12822/18654/14734/404710/15205/121…
GO:0016079	BP	GO:0016079	synaptic vesicle exocytosis	73	0.58893	2.49692	3.89686e-10	1.43032e-08	9.80083e-09	1802	tags=64%, list=21%, signal=51%	19339/64051/327814/207227/20977/20979/116837/56216/27062/26875/20964/22318/18751/20910/12361/12290/12298/76787/242662/229521/72194/12889/17957/12287/18645/20980/104015/20617/22249/64176/12048/320405/192167/59033/20614/14299/382018/26431/18750/20743/67808/111173/213760/60510/67474/12286/14809
GO:0032508	BP	GO:0032508	DNA duplex unwinding	38	-0.799824	-2.33009	3.89117e-10	1.43032e-08	9.80083e-09	921	tags=58%, list=11%, signal=52%	17535/19360/71567/22427/27354/69270/117599/17220/12144/272551/66634/78833/320209/79456/17217/17216/17218/19361/12544/17219/17215/21973
GO:0044774	BP	GO:0044774	mitotic DNA integrity checkpoint signaling	63	-0.72381	-2.24091	5.15898e-10	1.87005e-08	1.2814e-08	1012	tags=46%, list=12%, signal=41%	70681/15574/17535/56190/57913/17193/60364/27354/11920/54601/12144/18854/235559/12575/66131/19891/268465/76843/12649/50883/18392/12189/77011/12443/18817/211651/23834/12534/269582
GO:0009887	BP	GO:0009887	animal organ morphogenesis	441	-0.481606	-1.72748	5.20519e-10	1.87515e-08	1.28489e-08	1339	tags=27%, list=15%, signal=24%	110829/20535/237500/18053/12018/20683/12406/399558/243931/236266/17387/14088/18029/12387/269831/22059/228790/14707/18186/18208/16002/58208/13559/17242/17260/15213/54352/15376/14176/16973/229700/18541/70300/14107/21677/22339/16332/67784/68259/20377/19206/14815/14051/11749/19126/12705/66993/58235/18854/17869/20682/58198/20664/269941/20602/66910/14362/70235/233826/17698/18712/11600/21853/79456/73750…
GO:0071897	BP	GO:0071897	DNA biosynthetic process	129	-0.62402	-2.11045	5.96765e-10	2.13664e-08	1.46407e-08	1308	tags=43%, list=15%, signal=37%	71890/52530/108689/12387/11692/22059/216853/21749/72568/28113/21781/19718/68147/19360/18148/69263/234344/66262/22427/22339/18972/11920/245474/27015/69270/67967/68275/18854/17869/106344/72151/18971/272551/78833/12575/18538/20133/59125/18968/214901/16881/269424/18973/18974/76843/12649/72107/14186/18005/68026/208084/20877/18761/21877/14609
GO:0034508	BP	GO:0034508	centromere complex assembly	30	-0.829465	-2.30367	8.1762e-10	2.84025e-08	1.9462e-08	721	tags=57%, list=8%, signal=52%	67733/66578/50927/381280/69928/66311/60411/70645/15201/26886/66336/102920/72155/208628/12615/229841/218977
GO:0035239	BP	GO:0035239	tube morphogenesis	417	-0.482157	-1.72828	9.31573e-10	3.21696e-08	2.20433e-08	1324	tags=27%, list=15%, signal=24%	237500/18053/14160/17886/12018/20349/20683/17387/83964/12387/269831/216527/70726/20672/18186/17975/22379/20733/18208/16002/17242/17260/15213/15289/14615/15376/16973/229700/55982/69675/70300/29876/22340/94192/21872/242687/13852/21677/22339/67784/20377/19206/69219/18024/54601/14815/320910/15277/12705/18081/21815/18854/17869/108156/80837/20682/58198/14362/15368/57875/14268/54409/14595/18760/11600/10…
GO:0044843	BP	GO:0044843	cell cycle G1/S phase transition	176	-0.578774	-2.00055	9.57792e-10	3.28804e-08	2.25304e-08	1106	tags=30%, list=13%, signal=27%	14056/244879/50496/13559/319651/12580/72057/225182/56190/57913/12571/219103/69274/100088/50927/66993/18854/17869/12445/70891/105837/227292/12575/18214/67628/20133/27401/17349/11504/27214/269424/19891/12447/18973/19650/20674/12578/12566/14841/52679/106795/17863/12448/14632/13685/20460/12443/20135/14451/12428/71878/381293/404710
GO:0098655	BP	GO:0098655	monoatomic cation transmembrane transport	290	0.370459	1.94681	9.66537e-10	3.28957e-08	2.25408e-08	1547	tags=33%, list=18%, signal=28%	241528/68312/20269/14812/269615/12295/60613/18799/14226/12721/11419/14419/232975/108058/98741/100503659/16485/16526/72258/18795/223604/238871/94249/100102/170770/14166/16519/16522/211468/109305/432442/21366/22318/16502/109676/11735/78506/279561/110876/57440/12288/13483/19165/11975/69106/19122/110891/12290/238276/16504/12298/83704/81905/16536/14697/14168/12293/12287/12297/14810/114143/20191/72828/…
GO:0019953	BP	GO:0019953	sexual reproduction	333	-0.504617	-1.78999	1.00431e-09	3.38794e-08	2.32149e-08	1376	tags=27%, list=16%, signal=24%	11517/17685/14453/14782/20535/14160/17886/15512/28036/12593/236266/14088/83964/12387/69260/22059/270624/74360/17242/56449/64707/17350/72787/223921/52683/53885/29876/71567/53975/13852/114714/53381/56693/11920/54004/65971/26934/54725/26920/381678/20682/70891/15361/67374/66634/58186/70235/14595/12190/74041/12427/214901/11504/12531/69716/67121/17864/60530/17311/67030/104156/56296/215387/14087/20681/1…
GO:0042770	BP	GO:0042770	signal transduction in response to DNA damage	131	-0.613508	-2.0787	1.04519e-09	3.5056e-08	2.40211e-08	1601	tags=41%, list=18%, signal=34%	56371/114715/11350/72440/65964/68145/19355/17319/17685/230784/71890/67071/19367/67153/22059/70681/15574/17535/55982/56190/18148/57913/17193/60364/27354/11920/54601/83383/12144/18854/235559/12575/66131/237877/12190/241627/19891/12578/268465/76843/19361/12505/12021/12649/52679/14235/50883/12189/77011/12443/18817/211651/12534/269582
GO:0071103	BP	GO:0071103	DNA conformation change	50	-0.755712	-2.29133	1.54765e-09	5.10287e-08	3.49659e-08	1017	tags=50%, list=12%, signal=44%	15289/17535/21975/19360/71567/22427/27354/69270/117599/17220/12144/272551/226409/66634/78833/320209/79456/17217/17216/17218/19361/12544/17219/17215/21973
GO:0045931	BP	GO:0045931	positive regulation of mitotic cell cycle	87	-0.665282	-2.1387	1.84721e-09	6.05635e-08	4.14993e-08	823	tags=34%, list=9%, signal=32%	219103/16906/27053/114714/66993/12445/105837/18214/67628/20133/12190/11504/12531/27214/67177/19363/76843/12532/13685/20460/68612/67849/67141/12443/20135/11799/268697/12534/229841/15205
GO:0098662	BP	GO:0098662	inorganic cation transmembrane transport	287	0.368513	1.90275	2.08373e-09	6.75592e-08	4.6293e-08	1547	tags=33%, list=18%, signal=28%	241528/68312/20269/14812/269615/12295/60613/18799/14226/12721/11419/14419/232975/108058/98741/100503659/16485/16526/72258/18795/223604/238871/94249/100102/170770/14166/16519/16522/211468/109305/432442/21366/22318/16502/109676/11735/78506/279561/110876/57440/12288/13483/19165/11975/69106/19122/110891/12290/238276/16504/12298/83704/81905/16536/14697/14168/12293/12287/12297/14810/114143/20191/72828/…
GO:1901992	BP	GO:1901992	positive regulation of mitotic cell cycle phase transition	69	-0.691961	-2.17046	2.29949e-09	7.37353e-08	5.05249e-08	823	tags=38%, list=9%, signal=34%	219103/16906/114714/66993/12445/105837/18214/67628/20133/11504/12531/27214/67177/19363/76843/12532/20460/68612/67849/67141/12443/20135/11799/268697/12534/229841
GO:0007626	BP	GO:0007626	locomotory behavior	137	0.462929	2.22762	2.77855e-09	8.81282e-08	6.03873e-08	1980	tags=50%, list=23%, signal=39%	233878/53901/108015/110834/21367/18574/17762/232975/319924/15572/26414/22142/57754/109205/14816/29813/20315/78286/224129/99512/56320/22223/11444/58234/268860/14681/216856/12288/12290/103199/12298/268890/11305/545156/12287/319387/14810/19699/12805/11899/13508/18145/22771/20238/20617/109900/13385/13643/20614/15902/11820/208117/11496/70430/19156/320840/67269/17268/74018/12286/20273/11352/64930/19211…
GO:0051302	BP	GO:0051302	regulation of cell division	106	-0.635979	-2.11822	2.83439e-09	8.94136e-08	6.1268e-08	1097	tags=36%, list=13%, signal=32%	56338/16002/67455/17242/227937/14176/18226/22340/22339/19206/26934/12144/17869/12190/12531/19650/13388/16319/18590/52679/12704/240641/20878/20319/13605/52276/71819/18817/233406/23834/11799/18654/381293/20877/12316/19348/108961/70218
GO:0050678	BP	GO:0050678	regulation of epithelial cell proliferation	191	-0.558599	-1.94674	3.4961e-09	1.09695e-07	7.51651e-08	1066	tags=27%, list=12%, signal=24%	52615/16002/58208/17242/17260/15213/15289/28113/22340/18148/12571/22339/68259/20377/19206/328949/12577/17869/20682/15368/14595/18760/12190/353156/12010/21380/18129/56312/15117/16449/20674/21416/12578/14633/16776/17127/97165/15208/18128/14632/18140/20319/12443/14451/11799/12822/18654/14734/404710/15205/12192/14609
GO:0051054	BP	GO:0051054	positive regulation of DNA metabolic process	231	-0.538779	-1.88776	3.64679e-09	1.13811e-07	7.79857e-08	1308	tags=32%, list=15%, signal=28%	71890/56505/108689/11908/269400/12387/11692/73945/18950/216853/15289/21749/70681/12545/17350/22594/30877/70238/28113/72057/217578/17535/55982/19718/225182/19360/18148/69263/234344/22427/22339/27354/11920/237211/245474/69270/51869/14051/66993/381678/224008/19076/12144/18854/17869/106344/72151/272551/78833/18538/237877/21853/59125/214901/27214/327762/67177/11810/19361/12566/14633/52679/19362/14235/…
GO:0001944	BP	GO:0001944	vasculature development	333	-0.495966	-1.7593	5.54995e-09	1.70471e-07	1.1681e-07	1320	tags=28%, list=15%, signal=25%	18053/17886/12018/20349/20683/83964/12387/13653/269831/216527/70726/20672/18186/17975/22379/16002/108154/17242/17260/15213/15289/234740/14615/16973/229700/18541/55982/69675/70300/29876/22340/94192/21872/242687/21677/22339/67784/69219/18024/54601/320910/15277/13433/12705/18081/26920/18854/80837/13654/107869/15368/57875/14268/54409/56458/67628/14595/18760/11600/67916/107831/353156/242705/11504/2138…
GO:0065004	BP	GO:0065004	protein-DNA complex assembly	124	-0.60872	-2.0535	5.70035e-09	1.74174e-07	1.19348e-07	1205	tags=31%, list=14%, signal=27%	67219/22059/114741/20833/53605/15289/21749/67139/217578/18148/114714/67733/66578/50927/20682/108671/107435/381280/67628/69928/66311/27221/17216/67177/110749/60411/70645/15201/19361/26886/66336/102920/72155/12544/208628/66929/12615/229841/218977
GO:0000077	BP	GO:0000077	DNA damage checkpoint signaling	90	-0.660163	-2.13841	6.68101e-09	2.00981e-07	1.37716e-07	1212	tags=38%, list=14%, signal=33%	19367/67153/22059/70681/15574/17535/56190/57913/17193/60364/27354/11920/54601/12144/18854/235559/12575/66131/12190/241627/19891/268465/76843/19361/12021/12649/50883/12189/77011/12443/18817/211651/12534/269582
GO:0022412	BP	GO:0022412	cellular process involved in reproduction in multicellular organism	184	-0.56669	-1.9717	6.66033e-09	2.00981e-07	1.37716e-07	1319	tags=31%, list=15%, signal=27%	14160/17886/15512/28036/12593/236266/14088/83964/12387/69260/74360/17242/64707/17350/52683/53885/53975/114714/53381/20377/11920/54004/65971/26920/70891/67374/12190/74041/214901/12531/69716/67121/17864/60530/17311/104156/56296/215387/14087/17427/19361/228421/20878/97165/67141/68549/22137/18817/12442/12767/268697/229841/22417/237911/12316/67052/21973
GO:0071824	BP	GO:0071824	protein-DNA complex subunit organization	142	-0.588399	-2.00825	8.01222e-09	2.39791e-07	1.6431e-07	1205	tags=30%, list=14%, signal=26%	67219/22059/114741/20833/53605/15289/21749/67139/217578/18148/231506/114714/67733/66578/50927/66993/17869/20682/108671/107435/381280/67628/69928/66311/27221/17216/67177/110749/60411/70645/15201/19361/26886/66336/102920/72155/12544/208628/66929/12615/229841/218977
GO:0032200	BP	GO:0032200	telomere organization	124	-0.604823	-2.04035	1.00683e-08	2.98267e-07	2.04378e-07	1571	tags=42%, list=18%, signal=35%	11991/56207/56351/11545/20174/71890/52530/56505/226026/108689/269400/12387/55947/14056/67241/216853/14375/21749/22594/30877/28113/15574/17535/68147/19360/234344/22427/114714/27354/11920/245474/51869/68275/12144/18854/17869/70891/74335/107435/18538/12190/59125/79456/327762/19891/12447/19361/12448/18005/208084/20877/18761
GO:0048732	BP	GO:0048732	gland development	205	-0.546873	-1.91153	1.01861e-08	3.00234e-07	2.05726e-07	1214	tags=28%, list=14%, signal=25%	12387/11692/15288/228790/18186/14056/18208/16002/58208/17242/11486/16973/57295/14082/22339/67784/20377/19206/11920/14815/16367/74551/54725/12577/18854/20682/15368/17698/12190/68151/21380/18129/104156/20674/12608/21416/12578/14633/20181/12505/16776/18590/52679/17127/20878/14235/17863/18128/14632/12443/14634/12442/17345/22417/404710/15205/108961/14609
GO:0032504	BP	GO:0032504	multicellular organism reproduction	358	-0.485791	-1.72825	1.10021e-08	3.22653e-07	2.21089e-07	1469	tags=28%, list=17%, signal=24%	12041/14011/11545/67042/54650/11517/17685/14453/14782/20535/14160/17886/15512/28036/12593/20683/236266/14088/83964/12387/13653/69260/22059/270624/74360/11546/17242/11486/56449/64707/17350/72787/69064/52683/53885/71567/53975/114714/53381/20377/56693/11920/14815/54004/65971/26934/54725/26920/381678/20682/70891/15361/67374/66634/58186/70235/14595/12190/74041/12427/214901/11504/12531/69716/67121/1786…
GO:0045143	BP	GO:0045143	homologous chromosome segregation	30	-0.808196	-2.2446	1.11042e-08	3.24021e-07	2.22026e-07	1016	tags=67%, list=12%, signal=59%	21749/17350/72787/17535/76915/11920/381678/70891/30939/12190/19183/71846/69716/12447/14841/12448/105988/18817/211651/237911
GO:0001508	BP	GO:0001508	action potential	63	0.585907	2.35441	1.28993e-08	3.7453e-07	2.56635e-07	1213	tags=49%, list=14%, signal=43%	20269/14812/108015/71960/14226/16480/108058/16485/18212/11444/109676/11735/110876/12288/13483/14806/110891/319504/58802/12298/13052/14168/12293/12297/20191/230103/30948/83814/14682/12801/12313
GO:0031297	BP	GO:0031297	replication fork processing	37	-0.774954	-2.25854	1.37454e-08	3.91309e-07	2.68133e-07	1483	tags=70%, list=17%, signal=59%	68145/11545/104806/269400/21681/17535/225182/98415/19360/22427/27354/12144/226409/72749/18538/12190/69928/22036/212377/327762/268465/19361/12021/12189/209334/107373
GO:0044773	BP	GO:0044773	mitotic DNA damage checkpoint signaling	60	-0.712146	-2.19039	1.41339e-08	4.00414e-07	2.74372e-07	1012	tags=48%, list=12%, signal=43%	19367/22059/70681/15574/17535/56190/57913/17193/60364/27354/11920/54601/12144/18854/235559/12575/66131/19891/268465/76843/12649/50883/12189/77011/12443/18817/211651/12534/269582
GO:0007034	BP	GO:0007034	vacuolar transport	120	0.470656	2.20163	1.53863e-08	4.33789e-07	2.97241e-07	2812	tags=62%, list=32%, signal=43%	100102/53331/74772/57440/194309/81905/77975/65113/16971/66914/75788/30948/68299/71817/17237/14339/16553/11972/73205/72825/12492/353047/54377/218035/116733/77963/19156/53612/68192/74374/20661/105513/234852/11777/52120/209018/100502841/68943/269338/74018/230514/74718/320528/213326/104799/66530/11776/100504663/56433/68953/218699/67064/20615/19349/270096/76273/320191/68505/70827/67095/11852/228545/65…
GO:0007292	BP	GO:0007292	female gamete generation	77	-0.667817	-2.11973	1.58636e-08	4.45095e-07	3.04988e-07	1034	tags=38%, list=12%, signal=33%	17242/17350/52683/71567/53975/114714/11920/54004/26920/70891/66634/12190/11504/12531/69716/67121/215387/20878/67141/68549/22137/18817/12442/268697/229841/22417/12316/67052/21973
GO:0090307	BP	GO:0090307	mitotic spindle assembly	54	-0.720631	-2.19449	1.62019e-08	4.52414e-07	3.10003e-07	659	tags=41%, list=8%, signal=38%	70681/223921/73420/26934/70799/234094/16580/16319/100502766/50883/107995/17865/18005/52276/71819/18817/233406/11799/209737/72119/20877/16551
GO:0001568	BP	GO:0001568	blood vessel development	315	-0.495874	-1.75667	1.84678e-08	5.13228e-07	3.51674e-07	1320	tags=28%, list=15%, signal=25%	18053/17886/12018/20349/20683/83964/12387/13653/269831/216527/70726/20672/18186/17975/22379/16002/108154/17242/17260/15213/15289/14615/16973/229700/55982/69675/70300/29876/22340/94192/21872/242687/21677/22339/67784/69219/18024/54601/320910/15277/12705/18081/26920/18854/80837/13654/15368/57875/14268/54409/56458/14595/18760/11600/67916/107831/353156/242705/11504/21380/18129/15117/16449/13388/70097/…
GO:0033260	BP	GO:0033260	nuclear DNA replication	26	-0.825031	-2.21316	1.93475e-08	5.35128e-07	3.66681e-07	791	tags=69%, list=9%, signal=63%	12545/60364/69270/78833/18538/237877/12190/18968/16881/17217/27214/327762/17216/67177/19361/12544/17219/17215
GO:0032465	BP	GO:0032465	regulation of cytokinesis	58	-0.70593	-2.16275	2.04331e-08	5.62488e-07	3.85428e-07	438	tags=31%, list=5%, signal=30%	12190/12531/16319/52679/12704/240641/20878/13605/52276/71819/18817/233406/23834/11799/381293/20877/19348/108961
GO:0043009	BP	GO:0043009	chordate embryonic development	444	-0.460722	-1.65441	2.30204e-08	6.30738e-07	4.32195e-07	1243	tags=22%, list=14%, signal=20%	243931/17387/70769/12387/67153/22059/216527/20672/71458/217558/244879/20733/16002/11486/17260/15213/234740/56449/54352/15376/20937/57295/18541/225182/70300/242585/109065/21453/21872/21677/22051/100678/22339/27354/20377/19206/11920/69270/50927/12705/12577/21815/68275/57434/108156/58198/20602/66910/14362/233826/11600/12190/71876/16848/68119/21380/11695/72507/18129/26564/19363/13875/13388/20674/2087…
GO:0051781	BP	GO:0051781	positive regulation of cell division	38	-0.763318	-2.22374	2.33034e-08	6.35509e-07	4.35464e-07	1052	tags=55%, list=12%, signal=49%	16002/17242/227937/14176/18226/22340/22339/26934/12531/16319/18590/12704/240641/13605/52276/71819/23834/11799/18654/381293/20877
GO:0071459	BP	GO:0071459	protein localization to chromosome, centromeric region	22	-0.845821	-2.21201	2.50616e-08	6.80276e-07	4.66139e-07	553	tags=64%, list=6%, signal=60%	105837/67177/83815/68014/14841/70385/208628/22137/12615/12236/12534/20877/67052/76464
GO:2000300	BP	GO:2000300	regulation of synaptic vesicle exocytosis	40	0.661109	2.41588	3.04386e-08	8.22406e-07	5.6353e-07	1691	tags=62%, list=19%, signal=51%	19339/327814/207227/20977/20979/116837/20964/18751/12361/12290/12298/242662/72194/18645/22249/64176/12048/192167/59033/14299/26431/18750/67808/213760/67474
GO:0001649	BP	GO:0001649	osteoblast differentiation	107	-0.61184	-2.04131	3.17838e-08	8.54031e-07	5.852e-07	1052	tags=34%, list=12%, signal=30%	16002/17260/15213/16973/12571/22339/72007/68259/68010/20377/19206/12400/100201/12705/20682/14362/18214/18760/64075/16449/60530/20674/19712/12608/20681/14633/17127/18128/14632/20319/67141/14634/16007/22417/14560/14609
GO:0000723	BP	GO:0000723	telomere maintenance	119	-0.602157	-2.02663	3.19018e-08	8.54031e-07	5.852e-07	1571	tags=42%, list=18%, signal=35%	11991/56207/56351/11545/20174/71890/52530/56505/226026/108689/269400/12387/55947/67241/216853/14375/21749/22594/30877/28113/15574/17535/68147/19360/234344/22427/114714/27354/11920/245474/51869/68275/12144/18854/17869/70891/74335/18538/12190/59125/79456/327762/19891/12447/19361/12448/18005/208084/20877/18761
GO:0090231	BP	GO:0090231	regulation of spindle checkpoint	21	-0.849291	-2.20603	4.11954e-08	1.0928e-06	7.48809e-07	565	tags=57%, list=6%, signal=54%	74335/67177/56150/327799/16319/20878/209334/52276/11799/268697/20877/67052
GO:0000079	BP	GO:0000079	regulation of cyclin-dependent protein serine/threonine kinase activity	51	-0.716873	-2.1744	4.35236e-08	1.14934e-06	7.87551e-07	669	tags=41%, list=8%, signal=38%	12580/214444/83383/12144/12445/70891/12575/18712/12427/12447/12578/56742/12449/12448/20460/12443/18817/12442/23834/12428/268697
GO:0061138	BP	GO:0061138	morphogenesis of a branching epithelium	91	-0.636157	-2.05963	4.44179e-08	1.16767e-06	8.00112e-07	1324	tags=43%, list=15%, signal=37%	237500/20349/17387/12387/18186/20733/17242/15376/16973/229700/29876/22339/67784/20377/19206/18854/17869/20682/58198/11600/21853/21380/104156/20674/20681/14633/20181/12505/16776/18590/18128/20319/14634/12767/12826/22417/18654/15245/14734
GO:0003006	BP	GO:0003006	developmental process involved in reproduction	372	-0.47503	-1.6948	4.90294e-08	1.28312e-06	8.7922e-07	1376	tags=26%, list=16%, signal=23%	11517/17685/14453/14782/20535/14160/17886/12018/15512/28036/12593/236266/14088/83964/12387/69260/22059/20733/74360/103468/11546/17242/56449/54352/17350/72787/12416/53885/53975/78925/22339/114714/53381/20377/56693/11920/54004/68328/65971/26934/54725/12577/26920/381678/20682/70891/15361/67374/58186/70235/14595/11600/12190/74041/12427/214901/11504/12531/16848/69716/17864/56312/26564/17311/13875/1041…
GO:1905820	BP	GO:1905820	positive regulation of chromosome separation	24	-0.83775	-2.21918	5.01648e-08	1.30697e-06	8.95564e-07	933	tags=62%, list=11%, signal=56%	52683/78658/22038/68298/70099/67177/215387/16319/76044/14211/52276/11799/229841/20877/54392
GO:0044818	BP	GO:0044818	mitotic G2/M transition checkpoint	43	-0.743036	-2.2096	5.05961e-08	1.31235e-06	8.9925e-07	1012	tags=53%, list=12%, signal=47%	70681/15574/17535/225182/19360/17193/60364/27354/11920/54601/12144/235559/12575/76843/12021/12649/18392/12189/77011/18817/23834/12534/269582
GO:0008306	BP	GO:0008306	associative learning	55	0.591177	2.28403	5.13361e-08	1.32565e-06	9.08364e-07	1297	tags=45%, list=15%, signal=39%	14812/18574/11419/234593/232975/353342/18013/22142/11444/243961/58234/27403/17754/12288/12290/101489/14810/381979/15357/19699/108012/20238/195018/20614/11820
GO:0007507	BP	GO:0007507	heart development	309	-0.487867	-1.72809	5.18596e-08	1.33327e-06	9.13585e-07	1214	tags=24%, list=14%, signal=21%	12387/232334/22059/216527/20672/67694/228790/14707/18186/67603/11546/108154/17260/15213/14615/106628/229700/18541/216274/70300/14082/22340/21677/22339/67784/19206/11920/14815/66993/26920/108156/20682/58198/20602/14362/18213/12575/14268/54409/18712/11600/11504/21380/18129/23828/15117/16449/116701/54132/13388/19712/12369/14633/20181/17127/54598/18128/14632/13717/53318/20460/19662/20319/14634/12767/…
GO:1902750	BP	GO:1902750	negative regulation of cell cycle G2/M phase transition	51	-0.71338	-2.1638	5.49603e-08	1.40679e-06	9.63962e-07	1128	tags=51%, list=13%, signal=45%	28010/107503/70681/15574/17535/225182/19360/17193/19357/60364/27354/11920/54601/12144/235559/12575/76843/12021/12649/18392/12189/77011/18817/23834/12534/269582
GO:0007143	BP	GO:0007143	female meiotic nuclear division	27	-0.820755	-2.23299	5.75216e-08	1.46592e-06	1.00448e-06	976	tags=63%, list=11%, signal=56%	17350/52683/114714/11920/12531/69716/67121/215387/20878/67141/68549/22137/18817/12442/229841/67052/21973
GO:0007131	BP	GO:0007131	reciprocal meiotic recombination	27	-0.820244	-2.2316	6.10505e-08	1.54238e-06	1.05687e-06	976	tags=63%, list=11%, signal=56%	17350/76915/114714/235559/69928/19183/214901/69716/268465/19361/623474/19362/19366/211651/237911/234396/21973
GO:0140527	BP	GO:0140527	reciprocal homologous recombination	27	-0.820244	-2.2316	6.10505e-08	1.54238e-06	1.05687e-06	976	tags=63%, list=11%, signal=56%	17350/76915/114714/235559/69928/19183/214901/69716/268465/19361/623474/19362/19366/211651/237911/234396/21973
GO:1904029	BP	GO:1904029	regulation of cyclin-dependent protein kinase activity	54	-0.709056	-2.15924	6.41786e-08	1.61442e-06	1.10624e-06	669	tags=41%, list=8%, signal=38%	12580/214444/83383/12577/12144/12445/70891/12575/18712/12427/12447/12578/56742/12449/12448/20460/12443/18817/12442/23834/12428/268697
GO:0060562	BP	GO:0060562	epithelial tube morphogenesis	193	-0.53943	-1.88295	6.76371e-08	1.68688e-06	1.15588e-06	1324	tags=30%, list=15%, signal=26%	237500/14160/20349/17387/12387/216527/18186/20733/18208/17242/17260/15213/15376/16973/229700/70300/29876/21677/22339/67784/20377/19206/14815/21815/18854/17869/108156/20682/58198/14362/11600/21853/21380/18129/104156/13388/20674/244058/20681/14633/12505/16776/17127/240641/15208/18128/20460/20319/14634/12767/12826/22417/18654/15245/14734/15205/14609
GO:0006268	BP	GO:0006268	DNA unwinding involved in DNA replication	20	-0.85319	-2.18854	8.0248e-08	1.98444e-06	1.35978e-06	795	tags=70%, list=9%, signal=64%	22427/69270/17220/12144/272551/78833/79456/17217/17216/17218/19361/12544/17219/17215
GO:0019226	BP	GO:0019226	transmission of nerve impulse	34	0.682293	2.39002	9.01662e-08	2.2203e-06	1.52139e-06	694	tags=56%, list=8%, signal=52%	20269/108015/269116/71960/14226/16485/18212/18479/11444/11735/110876/13483/14806/319504/12290/58802/12298/81905/16536
GO:0051988	BP	GO:0051988	regulation of attachment of spindle microtubules to kinetochore	18	-0.857453	-2.1525	9.08563e-08	2.22789e-06	1.52659e-06	231	tags=61%, list=3%, signal=60%	26934/16319/51944/54141/18005/13605/52276/11799/268697/229841/20877
GO:0009792	BP	GO:0009792	embryo development ending in birth or egg hatching	453	-0.455074	-1.63556	1.17095e-07	2.83556e-06	1.94298e-06	1243	tags=21%, list=14%, signal=19%	243931/17387/70769/12387/67153/22059/216527/20672/71458/217558/244879/20733/16002/11486/17260/15213/234740/56449/54352/15376/20937/15574/57295/18541/225182/70300/242585/109065/21453/21872/21677/22051/100678/22339/27354/20377/19206/11920/69270/50927/12705/12577/21815/68275/57434/108156/58198/20602/66910/14362/233826/11600/12190/71876/16848/68119/21380/11695/72507/18129/26564/19363/13875/13388/2067…
GO:0002009	BP	GO:0002009	morphogenesis of an epithelium	275	-0.489322	-1.72863	1.31596e-07	3.17354e-06	2.17458e-06	1324	tags=26%, list=15%, signal=23%	237500/18053/14160/20349/236266/17387/12387/216527/226519/18186/20733/18208/17242/17260/15213/15376/16973/229700/53885/70300/14107/29876/21677/22339/67784/20377/19206/14815/12705/21815/208177/18854/17869/108156/20682/58198/14362/17698/11600/21853/21380/18129/16449/26564/104156/13388/20674/72080/244058/20681/14633/20181/12505/16776/18590/17127/240641/15208/18128/20460/20319/14634/12767/16007/12826…
GO:0003002	BP	GO:0003002	regionalization	176	-0.542832	-1.87632	1.37933e-07	3.31266e-06	2.2699e-06	1027	tags=25%, list=12%, signal=23%	17260/15213/15376/16973/216274/70300/109065/20377/19206/11920/66993/21815/57434/20664/269941/13654/66910/233826/55927/68151/16848/21380/11695/72507/18129/26564/13388/17427/14633/16776/17127/20878/15208/18128/14632/20460/14186/20319/14634/14451/15245/14734/15205/14609
GO:0048608	BP	GO:0048608	reproductive structure development	128	-0.578941	-1.95765	1.72253e-07	4.11995e-06	2.82307e-06	792	tags=25%, list=9%, signal=23%	22339/53381/20377/11920/68328/12577/20682/11600/12190/11504/16848/56312/26564/17311/20674/12608/21416/14087/20681/228421/14633/20181/12505/97165/18128/19662/20319/12443/22417/237911/12316/14609
GO:0032411	BP	GO:0032411	positive regulation of transporter activity	69	0.537153	2.18817	1.77095e-07	4.21846e-06	2.89058e-06	1773	tags=48%, list=20%, signal=38%	241528/68312/14419/16485/20974/18795/432442/58234/16502/109676/11735/279561/57440/238276/12298/81905/12293/12297/20191/13844/19699/15980/83814/75607/12313/237611/54377/19055/11933/77574/68943/16150/100986
GO:0051315	BP	GO:0051315	attachment of mitotic spindle microtubules to kinetochore	17	-0.861465	-2.14525	1.9028e-07	4.51412e-06	3.09317e-06	301	tags=53%, list=3%, signal=51%	67177/16319/52276/66977/11799/229841/73804/20877/67052
GO:0010972	BP	GO:0010972	negative regulation of G2/M transition of mitotic cell cycle	50	-0.711543	-2.15741	1.92153e-07	4.5218e-06	3.09843e-06	1012	tags=50%, list=12%, signal=44%	28010/70681/15574/17535/225182/19360/17193/19357/60364/27354/11920/54601/12144/235559/12575/76843/12021/12649/18392/12189/77011/18817/23834/12534/269582
GO:0000910	BP	GO:0000910	cytokinesis	115	-0.59178	-1.98907	1.91488e-07	4.5218e-06	3.09843e-06	438	tags=22%, list=5%, signal=21%	26934/11853/12190/12531/16319/52679/12704/240641/20878/80986/13605/52276/71819/18817/12615/233406/23834/68743/11799/108907/74107/381293/20877/19348/108961
GO:0030534	BP	GO:0030534	adult behavior	96	0.481391	2.17819	2.05334e-07	4.81257e-06	3.29767e-06	1962	tags=49%, list=23%, signal=38%	233878/108015/110834/21367/17762/232975/22142/57754/18189/20315/99512/18190/22223/18191/11444/243961/58234/268860/216856/12288/14406/217843/12298/545156/14810/18145/22771/20238/20617/13643/15902/11820/102774/11496/70430/76965/20743/239102/67269/12286/20273/11352/64930/19211/320790/15211/56747
GO:0000212	BP	GO:0000212	meiotic spindle organization	15	-0.883299	-2.11696	2.1258e-07	4.96247e-06	3.40039e-06	178	tags=47%, list=2%, signal=46%	20878/67141/105988/12442/229841/12316/67052
GO:0000082	BP	GO:0000082	G1/S transition of mitotic cell cycle	164	-0.549435	-1.89361	2.20975e-07	5.13788e-06	3.52058e-06	1106	tags=32%, list=13%, signal=28%	12530/194655/28036/72776/22059/14056/244879/50496/13559/319651/12580/72057/225182/56190/57913/12571/219103/69274/100088/50927/66993/18854/17869/12445/70891/105837/227292/12575/18214/67628/20133/27401/11504/27214/269424/19891/12447/18973/19650/12578/12566/14841/52679/106795/17863/12448/13685/20460/12443/20135/381293/404710
GO:0032467	BP	GO:0032467	positive regulation of cytokinesis	23	-0.824986	-2.16719	2.22766e-07	5.15899e-06	3.53504e-06	984	tags=61%, list=11%, signal=54%	227937/18226/26934/12531/16319/12704/240641/13605/52276/71819/23834/11799/381293/20877
GO:0000281	BP	GO:0000281	mitotic cytokinesis	61	-0.673106	-2.06926	2.40725e-07	5.53099e-06	3.78995e-06	231	tags=33%, list=3%, signal=32%	66616/18226/13852/26934/11853/16319/12704/240641/80986/13605/52276/71819/18817/12615/68743/11799/108907/74107/20877/19348
GO:0051053	BP	GO:0051053	negative regulation of DNA metabolic process	100	-0.613033	-2.0259	2.46814e-07	5.64865e-06	3.87057e-06	1363	tags=38%, list=16%, signal=32%	17685/71890/108689/269400/22059/18294/21749/17350/22594/28113/19360/60364/16332/27354/17688/11920/237211/51869/117599/12144/18854/226409/58186/12575/66131/21853/77782/67177/12649/214763/75317/57441/67141/223970/208084/69885/234396/14609
GO:0048754	BP	GO:0048754	branching morphogenesis of an epithelial tube	78	-0.641662	-2.03896	2.54233e-07	5.79254e-06	3.96917e-06	1324	tags=45%, list=15%, signal=38%	237500/20349/17387/12387/18186/17242/15376/16973/229700/29876/22339/67784/19206/18854/17869/20682/58198/11600/21853/21380/104156/20674/20681/14633/12505/16776/18128/20319/14634/12767/12826/22417/18654/15245/14734
GO:0010212	BP	GO:0010212	response to ionizing radiation	99	-0.60682	-2.00097	2.57071e-07	5.79254e-06	3.96917e-06	1374	tags=42%, list=16%, signal=36%	19355/17685/12018/13653/19367/22059/18950/68539/14375/70681/70238/66656/15574/55982/98415/22427/20377/11920/12955/224008/12144/57434/18854/17869/235559/12575/12190/56349/74041/60530/11810/19361/12021/623474/19362/19366/50883/12189/20319/13605/77011/211651
GO:0072001	BP	GO:0072001	renal system development	156	-0.548357	-1.88502	2.55585e-07	5.79254e-06	3.96917e-06	1243	tags=33%, list=14%, signal=29%	243931/12387/13653/228790/59015/18186/445007/103468/18263/108154/17260/15213/18541/216274/94192/22339/67784/20377/19206/11746/11677/19126/12705/12577/26920/17869/20682/58198/11600/21853/11504/18129/16449/13388/15201/20681/14633/12505/16776/18590/17127/15208/18128/19662/14634/12767/12826/22417/108000/18654/14734/15205
GO:0048514	BP	GO:0048514	blood vessel morphogenesis	268	-0.494928	-1.74733	2.56934e-07	5.79254e-06	3.96917e-06	1320	tags=29%, list=15%, signal=25%	18053/17886/12018/20349/20683/83964/12387/269831/216527/70726/20672/18186/17975/22379/16002/17242/15213/15289/14615/16973/229700/55982/69675/29876/22340/94192/21872/242687/21677/22339/67784/69219/18024/54601/320910/15277/12705/18081/18854/80837/15368/57875/14268/54409/14595/18760/11600/107831/353156/242705/11504/21380/18129/15117/16449/13388/70097/12827/20181/18590/52679/14235/12189/54598/18128/2…
GO:0051984	BP	GO:0051984	positive regulation of chromosome segregation	27	-0.806625	-2.19455	2.83684e-07	6.36761e-06	4.36322e-06	933	tags=67%, list=11%, signal=60%	67241/52683/78658/68298/58186/70099/67177/215387/16319/76044/14211/52276/23834/11799/268697/229841/20877/54392
GO:0016050	BP	GO:0016050	vesicle organization	229	0.350211	1.8256	2.87027e-07	6.41797e-06	4.39772e-06	2702	tags=52%, list=31%, signal=36%	19339/12721/20616/19275/20979/116837/103967/29813/56216/53331/20981/27062/74772/22318/20910/11975/229521/12889/12287/330401/11973/108012/20980/18412/69470/104015/52898/54411/232946/20617/22249/14339/16553/13385/11972/53378/108664/20614/64933/68767/353047/231717/66251/11966/60409/102058/218035/116733/77963/382018/13429/76252/53612/71982/72961/233405/214459/20661/105513/234852/111173/11777/209018/2…
GO:0034765	BP	GO:0034765	regulation of monoatomic ion transmembrane transport	203	0.371153	1.85183	2.89862e-07	6.45661e-06	4.4242e-06	1920	tags=41%, list=22%, signal=33%	241528/68312/20269/12295/60613/14226/12721/14419/108058/98741/100503659/16485/18795/238871/100102/14166/16519/16522/211468/432442/22318/58234/16502/109676/11735/279561/110876/12724/57440/12288/13483/19165/69106/19122/12290/238276/16504/12298/81905/16536/14697/14168/12293/15275/12287/12297/14810/20191/13844/19699/15980/72828/30948/83814/66109/75607/14360/20617/12313/18693/11820/237611/225055/21267…
GO:0051298	BP	GO:0051298	centrosome duplication	60	-0.686305	-2.11091	3.11577e-07	6.91392e-06	4.73756e-06	1603	tags=58%, list=18%, signal=48%	103573/319675/26425/17245/246102/212514/101565/382406/216846/236266/72776/75786/214444/18226/18148/219103/225659/74470/99100/70799/74335/70235/381644/234094/12190/233064/67203/20873/12566/100502766/12449/12189/209334/20460/67052
GO:0090266	BP	GO:0090266	regulation of mitotic cell cycle spindle assembly checkpoint	19	-0.845239	-2.15433	3.27326e-07	7.20858e-06	4.93947e-06	565	tags=63%, list=6%, signal=59%	214444/74335/67177/56150/327799/16319/209334/52276/11799/268697/20877/67052
GO:1903504	BP	GO:1903504	regulation of mitotic spindle checkpoint	19	-0.845239	-2.15433	3.27326e-07	7.20858e-06	4.93947e-06	565	tags=63%, list=6%, signal=59%	214444/74335/67177/56150/327799/16319/209334/52276/11799/268697/20877/67052
GO:0030855	BP	GO:0030855	epithelial cell differentiation	269	-0.493595	-1.74407	3.38633e-07	7.42956e-06	5.09089e-06	1164	tags=27%, list=13%, signal=24%	216527/226519/20672/67694/228790/14056/56338/20733/58208/17260/15213/234740/15376/286940/22350/14107/19207/29876/94192/21872/12571/13852/22339/72007/19206/14314/68328/74551/11677/19126/12705/12577/76123/99100/20682/58198/20602/14362/18213/17698/14595/270893/73750/21380/18129/622434/16449/21873/22117/13388/20674/11921/20873/19712/12608/20681/14633/20181/52679/17127/15208/18128/14632/12443/12767/12…
GO:0036465	BP	GO:0036465	synaptic vesicle recycling	66	0.544886	2.21207	3.45324e-07	7.54798e-06	5.17203e-06	1702	tags=55%, list=20%, signal=44%	19339/20616/16443/72685/100503185/20977/20979/103967/56216/23969/26875/22318/216856/20404/229521/17957/94190/108012/20980/30948/104015/20617/12048/192167/18717/64933/11465/218038/13429/26431/72961/104069/11777/56807/71770/12484
GO:0061326	BP	GO:0061326	renal tubule development	46	-0.71182	-2.12063	3.47624e-07	7.56989e-06	5.18705e-06	792	tags=50%, list=9%, signal=46%	17260/15213/22339/19206/19126/17869/20682/58198/21853/18129/16449/13388/20681/12505/16776/15208/18128/14634/12826/22417/18654/14734/15205
GO:0098815	BP	GO:0098815	modulation of excitatory postsynaptic potential	36	0.651671	2.30895	3.50672e-07	7.58576e-06	5.19792e-06	1297	tags=58%, list=15%, signal=50%	14812/18762/108013/18189/116837/56216/56320/26875/243961/58234/216856/14806/110891/12297/14810/81907/19699/56637/192167/13385/11820
GO:2001252	BP	GO:2001252	positive regulation of chromosome organization	91	-0.615385	-1.99238	3.50952e-07	7.58576e-06	5.19792e-06	1910	tags=44%, list=22%, signal=35%	245000/223828/22596/68501/21849/56456/20466/17120/11991/56207/20174/56505/226026/269400/12387/21749/30877/28113/17535/19360/234344/19357/27354/11920/245474/68298/13433/18854/14156/59125/70099/67177/215387/14211/12566/18005/68549/20877/18761/54392
GO:0048144	BP	GO:0048144	fibroblast proliferation	80	-0.636738	-2.03091	4.09813e-07	8.76069e-06	6.00301e-06	925	tags=31%, list=11%, signal=28%	57295/12571/66262/72007/27354/20377/18477/21815/18854/17869/12575/18214/14268/54124/56312/14456/14114/66197/18590/17863/23834/12428/268697/12534/108961
GO:0051231	BP	GO:0051231	spindle elongation	11	-0.915875	-2.0783	4.15541e-07	8.85072e-06	6.06469e-06	231	tags=82%, list=3%, signal=80%	26934/16319/52276/71819/233406/11799/16571/20877/16551
GO:0000018	BP	GO:0000018	regulation of DNA recombination	85	-0.620676	-1.98614	4.3774e-07	9.28965e-06	6.36546e-06	1484	tags=42%, list=17%, signal=35%	74355/11545/66362/20174/17685/71890/56505/269400/216853/21681/17350/55982/225182/19360/17688/237211/51869/117599/381678/224008/12144/226409/58186/635253/237877/21853/77782/60530/19891/19361/12649/19362/214763/75317/223970/234396
GO:0061458	BP	GO:0061458	reproductive system development	130	-0.576753	-1.9513	4.45768e-07	9.42573e-06	6.45871e-06	792	tags=25%, list=9%, signal=23%	22339/53381/20377/11920/68328/12577/20682/11600/12190/11504/16848/56312/26564/17311/20674/12608/21416/14087/20681/228421/14633/20181/12505/97165/18128/19662/20319/12443/22417/237911/12316/14609
GO:0051382	BP	GO:0051382	kinetochore assembly	16	-0.862711	-2.10997	4.52109e-07	9.49103e-06	6.50345e-06	431	tags=62%, list=5%, signal=60%	67139/69928/66311/60411/26886/72155/208628/12615/229841/218977
GO:0048568	BP	GO:0048568	embryonic organ development	219	-0.512133	-1.79162	4.52038e-07	9.49103e-06	6.50345e-06	1274	tags=27%, list=15%, signal=24%	20683/100900/17387/12387/22059/20672/106522/20733/18208/16002/11486/17260/15213/54352/18541/70300/21677/22339/19206/14051/12705/12577/68816/17869/20682/58198/233826/73750/21380/11695/18129/320398/26564/17311/13875/13388/20674/11921/20873/19712/12608/21416/14633/18590/52679/17127/17863/18128/14632/20460/19662/14634/16007/14451/12822/15205/108961/12192/14609
GO:0034762	BP	GO:0034762	regulation of transmembrane transport	280	0.321366	1.68436	5.03313e-07	1.05281e-05	7.21406e-06	1547	tags=34%, list=18%, signal=29%	241528/11847/68312/20269/12794/12295/24014/60613/14226/12721/13869/14419/108058/98741/100503659/16485/98496/18795/238871/18189/100102/260297/14166/16519/16522/211468/432442/243961/22318/58234/16502/109676/18751/11735/216856/279561/110876/12724/57440/12288/13483/19165/20411/69106/19122/12290/60597/18611/215113/238276/76686/16504/12298/81905/16536/14697/14168/12293/15275/12287/12297/14810/20191/138…
GO:0099565	BP	GO:0099565	chemical synaptic transmission, postsynaptic	63	0.545653	2.19265	5.12137e-07	1.06744e-05	7.31432e-06	1511	tags=52%, list=17%, signal=44%	14812/108015/110834/18762/108013/14802/18189/116837/56216/56320/26875/243961/58234/268860/216856/77531/14806/110891/60597/54393/12297/14810/81907/19699/56637/20238/20617/22249/192167/13385/11820/19055/72961
GO:0032414	BP	GO:0032414	positive regulation of ion transmembrane transporter activity	66	0.538074	2.18442	6.18093e-07	1.2837e-05	8.79615e-06	1870	tags=50%, list=22%, signal=40%	241528/68312/14419/16485/18795/432442/58234/16502/109676/11735/279561/57440/238276/12298/81905/12293/12297/20191/13844/19699/15980/83814/75607/12313/237611/54377/19055/11933/77574/68943/16150/100986/12315
GO:0006887	BP	GO:0006887	exocytosis	193	0.374258	1.79957	6.29344e-07	1.29783e-05	8.89298e-06	1726	tags=42%, list=20%, signal=34%	19339/12721/64051/69938/56013/100503659/327814/20974/16443/207227/11981/18479/20977/20979/116837/56216/20981/27062/26875/20964/74772/22318/75770/18751/14681/20910/12361/12288/67295/58994/107767/12290/12298/108030/76787/19340/242662/229521/72194/12889/17957/12287/76338/75914/76499/18645/12652/20980/104015/20617/22249/110279/64176/12048/320405/192167/18717/73205/59033/53378/20614/68767/14299/102058…
GO:0051650	BP	GO:0051650	establishment of vesicle localization	139	0.403838	1.93901	6.63556e-07	1.36356e-05	9.34339e-06	2866	tags=64%, list=33%, signal=44%	12794/19339/16572/20616/18762/327814/17756/11981/103967/16574/26875/74772/360213/58994/108030/229521/16886/16561/75914/76499/108012/17912/67774/16560/12934/104015/13191/228355/232946/20617/16553/75665/192167/53378/64933/69654/66251/60409/102058/116733/13429/214459/11777/13424/67581/27096/70612/76707/66994/11776/21754/76510/68953/53413/17281/78232/17920/26419/20615/19349/76205/73689/211556/59045/6…
GO:0001503	BP	GO:0001503	ossification	175	-0.532848	-1.84219	6.72385e-07	1.37686e-05	9.4345e-06	1090	tags=27%, list=13%, signal=24%	106522/16002/17242/17260/15213/20937/16973/57295/12571/22339/72007/16332/68259/68010/20377/19206/12400/100201/12705/20682/269941/13654/14362/18214/18760/64075/110789/16449/60530/20674/19712/12608/21416/20681/14633/20181/17127/18128/14632/20319/67141/14634/16007/22417/14560/14734/14609
GO:0051347	BP	GO:0051347	positive regulation of transferase activity	280	-0.47728	-1.68769	6.94419e-07	1.417e-05	9.7096e-06	1067	tags=23%, list=12%, signal=21%	216853/14375/16002/17260/77891/17535/19718/66616/64297/19360/18148/69263/234344/22359/22339/27354/71943/245474/69270/16367/218442/19076/17869/12445/70891/106344/72151/272551/78833/18213/12575/18214/21987/18538/18712/11600/13842/59125/214901/12531/67121/26564/77744/17311/14456/70097/18590/56742/72107/20460/14186/107995/18005/13605/12443/18817/23834/16007/268697/229841/269582/72119/381293/20877/187…
GO:0051046	BP	GO:0051046	regulation of secretion	333	0.30896	1.62439	7.11101e-07	1.44599e-05	9.90821e-06	1691	tags=39%, list=19%, signal=32%	14427/14812/110834/18799/14226/19339/17470/64051/17932/11419/14419/56013/75605/100503659/11785/19275/327814/16443/18795/18212/207227/11981/20977/20979/116837/20315/56216/224129/109689/16522/20981/109305/27062/26875/11444/20964/74772/18642/22318/75770/268860/18751/93691/14681/20910/12361/68267/216856/279561/12288/20394/67295/68039/58994/19276/12290/14761/16504/18575/12298/54393/19340/242662/20666/…
GO:1902969	BP	GO:1902969	mitotic DNA replication	13	-0.893581	-2.09188	7.22166e-07	1.46339e-05	1.00275e-05	705	tags=85%, list=8%, signal=78%	69270/78833/12190/18968/16881/17217/17216/19361/12544/17219/17215
GO:0006814	BP	GO:0006814	sodium ion transport	83	0.485819	2.1448	7.40288e-07	1.48465e-05	1.01731e-05	1785	tags=43%, list=21%, signal=35%	20269/11419/232975/108058/18795/94249/100102/14166/80884/21366/11735/279561/110876/69106/110891/140919/269513/14168/67149/12805/16525/83814/75607/58237/236794/59033/18693/235281/11933/72961/72055/20541/76501/75785/16150/20273
GO:0032412	BP	GO:0032412	regulation of monoatomic ion transmembrane transporter activity	140	0.402932	1.93468	7.52956e-07	1.50488e-05	1.03118e-05	1543	tags=39%, list=18%, signal=33%	241528/68312/12794/12295/14226/14419/108058/100503659/16485/18795/238871/18189/100102/260297/14166/432442/243961/22318/58234/16502/109676/11735/216856/279561/57440/69106/19122/60597/238276/12298/81905/14697/14168/12293/15275/12297/20191/13844/19699/15980/83814/75607/192167/13385/12313/18693/11820/237611/54377/235281/19055/11933/77574/12289/18750
GO:0003007	BP	GO:0003007	heart morphogenesis	120	-0.567999	-1.914	7.76052e-07	1.54049e-05	1.05558e-05	1250	tags=30%, list=14%, signal=26%	399558/12387/22059/228790/14707/18186/17260/15213/229700/21677/22339/67784/19206/66993/20682/20602/14362/18712/11600/11504/21380/18129/15117/16449/116701/13388/20181/17127/18128/13717/20460/19662/20319/16007/15205/14609
GO:0034501	BP	GO:0034501	protein localization to kinetochore	16	-0.856792	-2.0955	7.83349e-07	1.5434e-05	1.05757e-05	553	tags=88%, list=6%, signal=82%	12237/26951/67139/105837/67177/83815/68014/70385/208628/22137/12534/20877/67052/76464
GO:1903083	BP	GO:1903083	protein localization to condensed chromosome	16	-0.856792	-2.0955	7.83349e-07	1.5434e-05	1.05757e-05	553	tags=88%, list=6%, signal=82%	12237/26951/67139/105837/67177/83815/68014/70385/208628/22137/12534/20877/67052/76464
GO:0042254	BP	GO:0042254	ribosome biogenesis	262	-0.488762	-1.72373	7.85451e-07	1.5434e-05	1.05757e-05	3327	tags=76%, list=38%, signal=49%	227656/78581/216156/59050/19942/67949/75422/229317/66711/67390/53414/107071/20227/118451/66229/72198/21771/72344/100038991/67671/110954/27993/213773/68731/72284/216987/229937/66161/227522/56321/70285/67205/27966/433864/19090/67674/236732/103136/67994/225215/52513/68533/105372/224092/19989/18572/100609/66164/215194/14645/68845/67755/27176/214627/75273/66489/30946/102462/68979/50912/76846/20044/670…
GO:0051648	BP	GO:0051648	vesicle localization	155	0.393498	1.89401	8.85831e-07	1.73238e-05	1.18706e-05	2772	tags=62%, list=32%, signal=43%	12794/19339/16572/20616/18762/327814/27204/17756/11981/18189/103967/16574/26875/20964/74772/216856/360213/58994/108030/229521/16886/16561/75914/76499/12217/108012/17912/67774/16560/12934/104015/13191/228355/232946/20617/16553/12048/75665/192167/53378/64933/69654/66251/60409/102058/116733/13429/233405/214459/11777/13424/67581/27096/70612/76707/19211/66994/11776/21754/76510/68953/53413/17281/78232/…
GO:0043066	BP	GO:0043066	negative regulation of apoptotic process	493	-0.438729	-1.57937	9.51661e-07	1.84515e-05	1.26433e-05	1398	tags=25%, list=16%, signal=22%	20416/18996/14297/17319/17685/69660/110829/14629/15510/18053/78514/12018/66073/20349/236266/12387/11692/11669/69260/22059/18294/18186/13631/17975/217558/18950/59009/107503/51800/18813/15191/58208/17242/11486/17260/56449/54208/106628/18541/17535/14082/18226/170755/22340/18148/21872/57913/27053/22339/67784/20377/14314/170799/18024/14815/14051/13433/11677/75736/12705/12955/18008/12144/14678/57434/17…
GO:0097479	BP	GO:0097479	synaptic vesicle localization	51	0.575759	2.19154	1.06077e-06	2.03891e-05	1.39711e-05	1255	tags=49%, list=14%, signal=42%	12794/19339/16572/20616/27204/17756/18189/103967/16574/26875/20964/216856/360213/108030/12217/108012/67774/12934/104015/228355/232946/20617/12048/192167/64933
GO:0051445	BP	GO:0051445	regulation of meiotic cell cycle	29	-0.769075	-2.1124	1.08986e-06	2.06507e-05	1.41503e-05	392	tags=38%, list=5%, signal=36%	12531/16848/69716/19362/12532/107995/67141/22137/22417/12316/14609
GO:0051338	BP	GO:0051338	regulation of transferase activity	467	-0.438779	-1.57942	1.08775e-06	2.06507e-05	1.41503e-05	1067	tags=21%, list=12%, signal=19%	216853/14375/16002/17260/21749/108900/15376/22594/77891/244329/28113/12580/17535/19718/66616/64297/214444/18226/19360/18148/230899/69263/234344/22359/22339/16332/27354/20377/71943/245474/69270/16367/83383/218442/12577/19076/12144/18854/17869/12445/70891/106344/72151/272551/226849/78833/18213/12575/18214/21987/23882/18538/18712/11600/13842/59125/12427/214901/12531/67121/26564/77744/12447/17311/196…
GO:0030261	BP	GO:0030261	chromosome condensation	25	-0.802881	-2.13764	1.11344e-06	2.10293e-05	1.44097e-05	957	tags=56%, list=11%, signal=50%	244329/52683/78658/68298/70099/215387/76044/14211/67849/268697/12534/108907/54392/21973
GO:0034767	BP	GO:0034767	positive regulation of monoatomic ion transmembrane transport	88	0.470602	2.10968	1.13668e-06	2.1399e-05	1.4663e-05	1900	tags=45%, list=22%, signal=36%	241528/68312/14419/16485/18795/432442/58234/16502/109676/11735/279561/57440/12288/13483/238276/12298/81905/12293/12297/14810/20191/13844/19699/15980/83814/75607/20617/12313/237611/54377/19055/11933/77574/12289/76055/68943/16150/100986/12315/14062
GO:1901970	BP	GO:1901970	positive regulation of mitotic sister chromatid separation	14	-0.873513	-2.06985	1.17043e-06	2.19634e-05	1.50498e-05	301	tags=43%, list=3%, signal=41%	67177/16319/52276/11799/229841/20877
GO:2001020	BP	GO:2001020	regulation of response to DNA damage stimulus	232	-0.494949	-1.73282	1.18107e-06	2.2092e-05	1.51379e-05	2254	tags=44%, list=26%, signal=33%	70088/53817/67956/71777/101185/217127/12055/101943/225895/12611/75565/12581/109115/234736/20588/66125/14265/75698/245000/12952/23955/12054/21849/191578/14359/78656/67711/26992/223527/56456/114715/11350/22385/56207/65964/74355/68145/11545/226182/20174/73419/17319/71890/56505/269400/19367/67153/22059/18294/18950/216853/67872/15289/70681/22594/20937/70238/72057/55982/225182/18148/22038/11920/237211/…
GO:0007062	BP	GO:0007062	sister chromatid cohesion	40	-0.731507	-2.14084	1.2644e-06	2.35001e-05	1.61028e-05	1286	tags=52%, list=15%, signal=45%	226026/20843/12387/72117/17535/19357/114714/30939/14156/320209/79456/110033/14841/72107/72415/67849/107995/68549/12236/12235/71988
GO:0001763	BP	GO:0001763	morphogenesis of a branching structure	100	-0.593991	-1.96298	1.2629e-06	2.35001e-05	1.61028e-05	1324	tags=39%, list=15%, signal=33%	237500/20349/17387/12387/18186/20733/17242/15376/16973/229700/29876/22339/67784/20377/19206/18854/17869/20682/58198/11600/21853/21380/104156/20674/20681/14633/20181/12505/16776/18590/18128/20319/14634/12767/12826/22417/18654/15245/14734
GO:0031644	BP	GO:0031644	regulation of nervous system process	81	0.483493	2.11987	1.31863e-06	2.44303e-05	1.67401e-05	2141	tags=60%, list=25%, signal=46%	14812/12794/108015/18762/108013/18189/14816/116837/56216/228836/18190/56320/26875/11444/243961/58234/268860/216856/14806/110891/94185/103199/12297/14810/81907/19699/68585/20779/56637/224997/22249/192167/13385/11820/54377/239102/17967/14245/16592/100986/22041/231637/19211/14062/235086/224617/228880/78830/12404
GO:0061640	BP	GO:0061640	cytoskeleton-dependent cytokinesis	71	-0.630385	-1.97098	1.35289e-06	2.49153e-05	1.70725e-05	231	tags=28%, list=3%, signal=28%	66616/18226/13852/26934/11853/16319/12704/240641/80986/13605/52276/71819/18817/12615/68743/11799/108907/74107/20877/19348
GO:0008088	BP	GO:0008088	axo-dendritic transport	71	0.500075	2.10572	1.36491e-06	2.50491e-05	1.71642e-05	1617	tags=45%, list=19%, signal=37%	12794/18039/16572/17760/17762/16594/17756/22223/16574/18040/16593/17754/11735/360213/68724/16561/81907/12217/30957/67774/16560/228355/232946/64933/11820/16569/29819/68196/11777/13424/67269/23859
GO:0010639	BP	GO:0010639	negative regulation of organelle organization	264	-0.48692	-1.71957	1.38537e-06	2.52657e-05	1.73126e-05	891	tags=21%, list=10%, signal=20%	214444/19360/18148/17318/21872/242687/19357/27354/71943/11920/12257/268970/208177/18854/225115/70799/109242/74335/105837/70420/79456/69716/56312/17216/67177/56150/327799/16319/107351/12649/68014/14841/100502766/80986/12449/209334/70385/107995/67141/208628/52276/22137/18817/67629/66442/66977/12236/11799/268697/229841/72119/208084/12235/20877/67052/21973
GO:0001822	BP	GO:0001822	kidney development	148	-0.546018	-1.86882	1.4592e-06	2.65293e-05	1.81784e-05	1243	tags=34%, list=14%, signal=29%	243931/12387/13653/228790/59015/18186/445007/103468/18263/108154/17260/15213/18541/216274/94192/22339/67784/20377/19206/11746/11677/19126/12705/12577/26920/17869/20682/58198/11600/21853/11504/18129/16449/13388/15201/20681/14633/12505/16776/18590/17127/15208/18128/14634/12767/22417/108000/18654/14734/15205
GO:0006271	BP	GO:0006271	DNA strand elongation involved in DNA replication	13	-0.885708	-2.07345	1.47762e-06	2.67807e-05	1.83507e-05	733	tags=85%, list=8%, signal=78%	18972/69270/67967/17220/18538/18968/16881/17217/327762/18973/17215
GO:0007613	BP	GO:0007613	memory	79	0.48821	2.10934	1.63696e-06	2.95767e-05	2.02666e-05	1895	tags=53%, list=22%, signal=42%	14812/53901/11419/17762/18762/232975/18795/18212/22142/238871/208922/11444/243961/98388/58234/56710/27403/17754/110876/19165/110891/229521/545156/14168/14810/19699/12326/20238/12801/20614/11820/208117/382056/23821/18032/72961/67979/19242/224938/432530/19211/19141
GO:0072080	BP	GO:0072080	nephron tubule development	41	-0.718059	-2.1182	1.65384e-06	2.97895e-05	2.04124e-05	1027	tags=54%, list=12%, signal=48%	17260/15213/22339/19206/19126/17869/20682/58198/21853/18129/16449/13388/20681/12505/16776/15208/18128/14634/22417/18654/14734/15205
GO:0030174	BP	GO:0030174	regulation of DNA-templated DNA replication initiation	10	-0.912839	-2.01451	1.74546e-06	3.13431e-05	2.14769e-05	641	tags=90%, list=7%, signal=83%	17220/17217/17216/67177/17218/12566/77011/17219/17215
GO:0007095	BP	GO:0007095	mitotic G2 DNA damage checkpoint signaling	31	-0.753764	-2.11497	2.03331e-06	3.6178e-05	2.47899e-05	1012	tags=55%, list=12%, signal=49%	70681/17535/17193/60364/27354/11920/54601/12144/235559/12575/76843/12649/12189/77011/18817/12534/269582
GO:0022613	BP	GO:0022613	ribonucleoprotein complex biogenesis	356	-0.449375	-1.59913	2.13016e-06	3.7786e-05	2.58918e-05	3240	tags=71%, list=37%, signal=46%	75422/12729/229317/320632/66711/67390/53414/107071/20227/118451/66229/192159/20815/72198/21771/72344/192196/55944/100038991/67465/67671/110954/27993/213773/68731/72284/216987/229937/66161/227522/56321/70285/67205/217869/27966/433702/433864/19090/67674/236732/103136/67994/225215/52513/68533/105372/224092/19989/214572/18572/100609/66164/215194/14645/68845/67755/27176/214627/13211/75273/66489/30946/…
GO:0019228	BP	GO:0019228	neuronal action potential	15	0.792475	2.26393	2.15562e-06	3.80066e-05	2.60429e-05	941	tags=73%, list=11%, signal=66%	20269/108015/71960/16485/11444/11735/110876/13483/14806/58802/230103
GO:0015844	BP	GO:0015844	monoamine transport	37	0.6233	2.23624	2.58325e-06	4.4603e-05	3.05629e-05	1913	tags=76%, list=22%, signal=59%	18799/19339/20979/20315/20981/27062/11444/268860/18751/58994/54393/229521/76306/12652/20980/68585/18546/20617/12801/22433/18693/243328/269642/14758/68943/60510/11461/17069
GO:0099175	BP	GO:0099175	regulation of postsynapse organization	98	0.442566	2.00359	2.58029e-06	4.4603e-05	3.05629e-05	1502	tags=37%, list=17%, signal=31%	14812/13004/107065/56013/211134/327814/16443/18187/18189/241514/103967/12569/56320/58234/12361/19165/19122/319504/545156/19280/216831/14810/13844/19699/272381/16560/80749/14360/241638/192167/22084/11820/382253/170731/11487/29819
GO:0045667	BP	GO:0045667	regulation of osteoblast differentiation	79	-0.617631	-1.9707	2.80281e-06	4.82513e-05	3.30628e-05	1027	tags=35%, list=12%, signal=32%	17260/15213/16973/12571/22339/72007/68010/20377/19206/100201/12705/20682/18214/18760/64075/16449/20674/19712/12608/17127/18128/14632/20319/67141/14634/16007/22417/14560
GO:0140238	BP	GO:0140238	presynaptic endocytosis	61	0.523085	2.08528	2.81513e-06	4.83209e-05	3.31105e-05	2288	tags=64%, list=26%, signal=47%	20616/16443/72685/100503185/20977/20979/103967/23969/22318/216856/20404/229521/17957/94190/20980/30948/104015/20617/12048/192167/18717/64933/11465/66251/218038/13429/67602/72961/104069/11777/56807/71770/12484/11461/11776/224617/269774/13430/11773
GO:2000278	BP	GO:2000278	regulation of DNA biosynthetic process	92	-0.59508	-1.93232	2.96394e-06	5.07259e-05	3.47584e-05	1281	tags=39%, list=15%, signal=34%	108689/12387/11692/22059/216853/21749/28113/21781/19718/18148/69263/234344/66262/22339/11920/245474/69270/18854/17869/106344/72151/272551/78833/12575/18538/59125/214901/269424/12649/72107/14186/18005/208084/20877/18761/14609
GO:0035249	BP	GO:0035249	synaptic transmission, glutamatergic	69	0.504275	2.05424	3.41498e-06	5.77676e-05	3.95835e-05	1802	tags=55%, list=21%, signal=44%	14812/12794/353342/18212/18479/14802/20979/18189/14816/232370/58234/20910/216856/14806/60597/140919/12298/81905/17957/14810/94190/19699/22249/12801/192167/195018/14800/208117/54377/382018/72961/67808/67979/13649/229791/74018/12286/14809
GO:0022612	BP	GO:0022612	gland morphogenesis	60	-0.656769	-2.02006	3.43465e-06	5.79324e-05	3.96964e-05	1130	tags=42%, list=13%, signal=37%	18186/18208/17242/16973/67784/20377/19206/14815/18854/20682/17698/18129/104156/12608/12578/14633/20181/12505/16776/18590/18128/14632/14634/17345/22417
GO:0007548	BP	GO:0007548	sex differentiation	119	-0.558569	-1.87993	3.66619e-06	6.16596e-05	4.22504e-05	1363	tags=33%, list=16%, signal=28%	17685/14453/17886/12018/12387/69260/103468/56449/54352/12416/78925/22339/53381/20377/11920/68328/20682/11600/12190/11504/16848/56312/26564/17311/20674/56296/12608/21416/14087/20681/228421/97165/19662/20319/12443/22417/237911/12316/14609
GO:0048598	BP	GO:0048598	embryonic morphogenesis	306	-0.457862	-1.62072	3.80554e-06	6.38194e-05	4.37304e-05	1080	tags=20%, list=12%, signal=18%	20733/18208/16002/17260/234740/228839/54352/15376/16973/70300/21677/102693/20377/19206/14051/12577/21815/208177/17869/108156/20682/58198/66910/14362/14268/67916/73750/68151/21380/11695/18129/320398/26564/13875/13388/20674/11921/19712/21416/244058/20681/14633/16776/17127/240641/15208/18128/14632/20460/19662/20319/12832/14634/16007/14451/22417/14734/15205/12192/14609
GO:0035418	BP	GO:0035418	protein localization to synapse	65	0.513742	2.07161	3.85166e-06	6.44077e-05	4.41335e-05	1502	tags=55%, list=17%, signal=46%	665113/16572/13869/17762/18762/26414/18189/56216/232370/18190/16574/26875/18191/243961/18196/22318/16593/17754/216856/26422/12889/545156/216831/14810/12217/19699/65945/30957/56637/224997/192167/13385/20614/11496/11487/29819
GO:0001701	BP	GO:0001701	in utero embryonic development	295	-0.468789	-1.6586	4.08897e-06	6.81806e-05	4.67188e-05	1214	tags=22%, list=14%, signal=20%	12387/67153/22059/216527/20672/71458/217558/244879/20733/16002/11486/15213/234740/56449/15376/20937/57295/18541/225182/109065/21872/100678/22339/27354/19206/69270/50927/12705/12577/68275/57434/20602/233826/11600/12190/68119/18129/19363/13875/13388/20674/20873/12608/21416/20681/76044/14633/20181/12649/52679/17127/17863/18128/20460/18005/66929/14634/20135/12442/16007/268697/15205/108961/12192/14609
GO:0030097	BP	GO:0030097	hemopoiesis	461	-0.427929	-1.53996	4.18229e-06	6.9538e-05	4.76489e-05	1419	tags=24%, list=16%, signal=21%	20085/19766/15526/18996/17685/21847/14357/20535/17886/12018/20683/100900/74206/17387/230721/83964/12387/13653/226747/22059/228790/18950/14056/59009/14375/58208/17242/59014/11486/17260/15289/67017/109711/52683/229700/72057/12398/16852/14082/17089/242687/12571/66262/22339/98386/20377/12400/22038/100201/210293/170799/11920/18024/14815/320910/16498/26934/66993/69656/18081/103743/12577/68275/12144/188…
GO:0070050	BP	GO:0070050	neuron cellular homeostasis	42	0.596982	2.19758	4.42455e-06	7.3357e-05	5.02658e-05	2552	tags=71%, list=29%, signal=51%	17754/19165/11975/110891/14810/11973/13191/54411/64176/12801/11972/108664/14299/11820/11966/54003/17357/76252/72961/111173/66144/12286/11941/73834/20615/70495/11964/66335/12568/50932
GO:1902806	BP	GO:1902806	regulation of cell cycle G1/S phase transition	125	-0.552019	-1.86127	4.65039e-06	7.66658e-05	5.2533e-05	937	tags=26%, list=11%, signal=23%	12580/72057/56190/57913/219103/69274/66993/18854/12445/105837/227292/12575/18214/67628/20133/17349/11504/27214/269424/19891/19650/20674/12578/14841/52679/14632/20460/12443/20135/14451/71878/381293
GO:0060078	BP	GO:0060078	regulation of postsynaptic membrane potential	68	0.498586	2.02523	5.01512e-06	8.24457e-05	5.64935e-05	1297	tags=49%, list=15%, signal=42%	14812/108015/110834/14395/18762/108013/14802/18189/116837/56216/56320/26875/243961/58234/268860/216856/14406/14806/110891/60597/52882/54393/12297/14810/81907/19699/56637/20238/20617/22249/192167/13385/11820
GO:0072009	BP	GO:0072009	nephron epithelium development	48	-0.675223	-2.03429	5.33275e-06	8.73128e-05	5.98285e-05	792	tags=52%, list=9%, signal=48%	12387/228790/17260/15213/22339/19206/19126/12705/17869/20682/58198/21853/18129/16449/13388/20681/12505/16776/15208/18128/14634/22417/18654/14734/15205
GO:0001889	BP	GO:0001889	liver development	72	-0.616414	-1.92962	5.37657e-06	8.76472e-05	6.00577e-05	1405	tags=36%, list=16%, signal=31%	16438/110829/20683/11692/15288/14056/17242/11486/57295/74551/54725/20682/15368/18129/12608/12578/52679/17127/20878/14235/18128/14632/12443/17345/15205/108961
GO:0034660	BP	GO:0034660	ncRNA metabolic process	430	-0.428517	-1.53487	5.64524e-06	9.15157e-05	6.27084e-05	3332	tags=64%, list=38%, signal=41%	227644/227656/93697/209584/78581/216156/59050/52686/104458/19942/67949/70044/75422/107328/66711/272396/67390/67010/53414/107071/20227/66229/76563/80913/16476/72198/21771/72344/105083/76781/100038991/77065/27993/71984/213773/68731/72085/216987/229937/66161/227522/70285/67205/68730/74753/27966/212679/433702/66926/19090/67674/101861/103136/18130/212528/67994/52513/68533/105372/19989/53379/18572/2087…
GO:0008584	BP	GO:0008584	male gonad development	56	-0.65233	-1.99112	5.78729e-06	9.33001e-05	6.39311e-05	780	tags=29%, list=9%, signal=26%	53381/20377/68328/20682/56312/14087/20681/228421/97165/19662/20319/12443/22417/237911/12316/14609
GO:0046546	BP	GO:0046546	development of primary male sexual characteristics	56	-0.65233	-1.99112	5.78729e-06	9.33001e-05	6.39311e-05	780	tags=29%, list=9%, signal=26%	53381/20377/68328/20682/56312/14087/20681/228421/97165/19662/20319/12443/22417/237911/12316/14609
GO:0050803	BP	GO:0050803	regulation of synapse structure or activity	194	0.350999	1.70391	6.29646e-06	0.000100951	6.91737e-05	1648	tags=36%, list=19%, signal=30%	14812/13004/107065/270190/18039/19277/20450/20616/56013/211134/18013/234267/327814/16443/18212/22142/18187/18189/241514/103967/12569/232370/56320/11444/12386/58234/12361/216856/170571/19165/19122/319504/140919/242662/545156/19280/319387/216831/14810/13844/19699/65945/272381/18708/15569/16560/80749/14360/16981/13191/56637/241638/20617/192167/13643/18693/22084/11820/105689/72289/382253/170731/76965…
GO:0045665	BP	GO:0045665	negative regulation of neuron differentiation	54	-0.65992	-2.00961	6.66005e-06	0.000105908	7.257e-05	1025	tags=44%, list=12%, signal=39%	19716/15213/15376/69064/212547/214444/19205/27354/242748/20682/50913/227292/12010/16449/13388/20674/19712/20681/12704/15208/18128/14634/12316/15205
GO:0048791	BP	GO:0048791	calcium ion-regulated exocytosis of neurotransmitter	17	0.755892	2.18829	6.74094e-06	0.000106902	7.32518e-05	1722	tags=76%, list=20%, signal=61%	19339/20979/116837/56216/27062/20910/242662/229521/20980/22249/20614/382018/12286
GO:0008344	BP	GO:0008344	adult locomotory behavior	62	0.50517	2.01192	6.77837e-06	0.000107205	7.3459e-05	1962	tags=50%, list=23%, signal=39%	233878/21367/17762/232975/22142/57754/20315/99512/22223/216856/12288/12298/545156/14810/18145/22771/20238/20617/13643/15902/11820/11496/70430/67269/12286/20273/11352/64930/320790/15211/56747
GO:0007389	BP	GO:0007389	pattern specification process	195	-0.502892	-1.75652	7.01951e-06	0.000110718	7.58666e-05	1027	tags=24%, list=12%, signal=21%	17260/15213/15376/16973/216274/70300/109065/20377/19206/11920/12705/66993/21815/57434/20664/269941/13654/66910/233826/55927/68151/16848/21380/11695/72507/18129/26564/27412/13388/17427/14633/16776/17127/20878/15208/18128/14632/20460/14186/20319/14634/14451/15245/14734/15205/14609
GO:0072089	BP	GO:0072089	stem cell proliferation	58	-0.643947	-1.97285	7.26864e-06	0.000114032	7.81369e-05	1214	tags=34%, list=14%, signal=30%	12387/22059/20672/12580/19206/18008/20682/18712/12190/12447/17311/14114/14633/97165/14235/18128/20319/14634/17345/12192
GO:0045137	BP	GO:0045137	development of primary sexual characteristics	98	-0.57628	-1.89623	7.37539e-06	0.000115396	7.90719e-05	1073	tags=29%, list=12%, signal=25%	103468/56449/54352/12416/22339/53381/20377/11920/68328/20682/11600/12190/11504/16848/56312/17311/12608/14087/20681/228421/97165/19662/20319/12443/22417/237911/12316/14609
GO:2000241	BP	GO:2000241	regulation of reproductive process	77	-0.608782	-1.93235	7.68413e-06	0.000119267	8.17245e-05	792	tags=30%, list=9%, signal=27%	22339/53381/20377/20682/14595/12531/16848/69716/56312/16449/14087/20181/19362/20878/12532/18128/107995/67141/68549/22137/22417/12316/14609
GO:0048146	BP	GO:0048146	positive regulation of fibroblast proliferation	42	-0.696814	-2.06447	7.91703e-06	0.000122232	8.3756e-05	925	tags=50%, list=11%, signal=45%	11350/14284/17319/18053/67153/57295/12571/72007/21815/18854/17869/12575/18214/14268/14456/14114/18590/17863/23834/12428/268697
GO:1901978	BP	GO:1901978	positive regulation of cell cycle checkpoint	15	-0.848803	-2.03428	7.91578e-06	0.000122232	8.3756e-05	565	tags=53%, list=6%, signal=50%	74335/56150/16319/209334/52276/11799/20877/67052
GO:0106027	BP	GO:0106027	neuron projection organization	82	0.464611	2.0412	8.04188e-06	0.000123832	8.48524e-05	1895	tags=46%, list=22%, signal=37%	14812/270190/56013/232975/327814/241514/103967/12569/56320/243961/58234/12361/17754/19122/545156/216831/14810/13844/19699/18163/16560/14360/13191/56637/241638/192167/13385/18693/11820/170731/11487/29819/12323/64451/11352/66713/19211/19141
GO:0098534	BP	GO:0098534	centriole assembly	34	-0.713115	-2.04355	8.13294e-06	0.000124577	8.53628e-05	1547	tags=68%, list=18%, signal=56%	319675/17245/246102/232933/212514/101565/382406/216846/236266/72776/214444/18226/18148/219103/225659/74470/99100/70799/381644/233064/20873/12566/20460
GO:0016072	BP	GO:0016072	rRNA metabolic process	203	-0.49544	-1.732	8.2359e-06	0.000125824	8.62171e-05	3327	tags=77%, list=38%, signal=49%	227656/78581/216156/59050/19942/67949/75422/66711/67390/53414/107071/20227/66229/72198/21771/72344/105083/100038991/27993/213773/68731/216987/229937/66161/227522/70285/67205/27966/19090/67674/103136/67994/52513/68533/105372/19989/18572/100609/215194/68845/67755/214627/75273/66489/30946/102462/68979/50912/20044/67025/19941/67222/110816/78394/213550/20017/64934/66181/98956/20115/104662/67493/69663/…
GO:0001525	BP	GO:0001525	angiogenesis	217	-0.481729	-1.6855	8.35332e-06	0.000127285	8.7218e-05	1320	tags=29%, list=15%, signal=26%	18053/17886/20349/20683/83964/12387/269831/216527/70726/20672/18186/17975/22379/16002/17242/15289/229700/69675/29876/22340/94192/21872/242687/22339/67784/69219/18024/54601/320910/15277/18081/18854/80837/15368/57875/14268/54409/14595/18760/11600/107831/353156/242705/11504/21380/18129/13388/70097/12827/20181/18590/52679/12189/54598/18128/23871/20319/12767/16007/12826/12822/18654/15245/108961
GO:0006644	BP	GO:0006644	phospholipid metabolic process	197	0.345975	1.72215	8.67973e-06	0.000131914	9.039e-05	2359	tags=46%, list=27%, signal=34%	269615/18799/192156/232086/216152/272031/230779/13869/208715/18795/13139/100102/236899/15926/18710/193742/668212/235044/20597/27410/240752/56077/58994/18709/14137/103199/75769/11305/16329/68671/68603/170749/19062/14077/74182/66082/18708/68262/56442/14705/66569/104015/76500/20617/110196/67216/18717/219135/216739/71795/50767/17855/320951/319554/70310/210376/26457/24057/19012/27399/229791/67630/1424…
GO:0090232	BP	GO:0090232	positive regulation of spindle checkpoint	12	-0.878758	-2.02459	9.11047e-06	0.000137033	9.38977e-05	565	tags=67%, list=6%, signal=62%	74335/56150/16319/209334/52276/11799/20877/67052
GO:0090267	BP	GO:0090267	positive regulation of mitotic cell cycle spindle assembly checkpoint	12	-0.878758	-2.02459	9.11047e-06	0.000137033	9.38977e-05	565	tags=67%, list=6%, signal=62%	74335/56150/16319/209334/52276/11799/20877/67052
GO:0006284	BP	GO:0006284	base-excision repair	35	-0.71983	-2.07526	9.42153e-06	0.000140265	9.61127e-05	1171	tags=51%, list=13%, signal=45%	68240/18294/11546/15289/18207/22594/22427/68275/15361/18971/18538/16881/77782/327762/19891/18973/22256/234258
GO:0061008	BP	GO:0061008	hepaticobiliary system development	73	-0.611885	-1.92797	9.37522e-06	0.000140265	9.61127e-05	1405	tags=36%, list=16%, signal=30%	16438/110829/20683/11692/15288/14056/17242/11486/57295/74551/54725/20682/15368/18129/12608/12578/52679/17127/20878/14235/18128/14632/12443/17345/15205/108961
GO:0048167	BP	GO:0048167	regulation of synaptic plasticity	129	0.402189	1.90991	9.36219e-06	0.000140265	9.61127e-05	1895	tags=49%, list=22%, signal=39%	14812/21367/319984/19339/107065/268755/17762/211134/18762/18013/18212/208922/18479/20977/116837/260297/56320/20964/18196/22318/58234/20910/17754/19165/14806/19122/110891/238276/76787/242662/14810/22628/381979/70441/13844/19699/18163/66082/18412/56637/20617/22249/12048/192167/13385/195018/18693/20614/11820/382056/23821/382018/29819/111173/19242/12323/26562/432530/240057/231637/240028/19211/19141
GO:0048232	BP	GO:0048232	male gamete generation	217	-0.479597	-1.67804	9.78121e-06	0.00014525	9.95281e-05	1469	tags=26%, list=17%, signal=22%	12041/67042/54650/11517/14782/20535/15512/28036/12593/236266/83964/69260/22059/74360/56449/64707/17350/72787/53885/114714/53381/56693/11920/65971/26934/54725/381678/20682/70891/15361/67374/66634/58186/70235/12190/74041/12427/214901/69716/17864/60530/104156/14087/20681/17427/19361/228421/224171/12704/97165/18128/14632/19662/68549/237911/12316/14609
GO:0008406	BP	GO:0008406	gonad development	96	-0.580089	-1.90256	9.92305e-06	0.000146656	0.000100492	792	tags=25%, list=9%, signal=23%	22339/53381/20377/11920/68328/20682/11600/12190/11504/16848/56312/17311/12608/14087/20681/228421/97165/19662/20319/12443/22417/237911/12316/14609
GO:0048488	BP	GO:0048488	synaptic vesicle endocytosis	58	0.52253	2.05812	1.0288e-05	0.000151618	0.000103892	2022	tags=59%, list=23%, signal=45%	20616/16443/72685/100503185/20977/20979/103967/23969/22318/216856/20404/229521/17957/94190/20980/30948/104015/20617/12048/192167/18717/64933/11465/218038/13429/72961/104069/11777/56807/71770/12484/11461/11776/224617
GO:0050807	BP	GO:0050807	regulation of synapse organization	190	0.34483	1.69017	1.03222e-05	0.000151738	0.000103974	1648	tags=35%, list=19%, signal=29%	14812/13004/107065/270190/18039/19277/20450/20616/56013/211134/18013/234267/327814/16443/18212/22142/18187/18189/241514/103967/12569/232370/56320/11444/12386/58234/12361/216856/170571/19165/19122/319504/242662/545156/19280/319387/216831/14810/13844/19699/65945/272381/18708/15569/16560/80749/14360/16981/13191/56637/241638/20617/192167/13643/22084/11820/105689/72289/382253/170731/76965/11487/29819/…
GO:0007600	BP	GO:0007600	sensory perception	163	0.359309	1.75006	1.03872e-05	0.000152311	0.000104367	1722	tags=42%, list=20%, signal=34%	18155/224224/20269/14812/50769/60613/71960/19339/17391/270190/231503/268755/11419/16485/22141/208922/109205/14816/20315/225362/78286/99512/109689/22223/11444/243961/17754/216856/68955/68039/14806/12290/18575/12298/235380/215210/18082/12287/12297/14810/22248/70441/17984/21683/230103/66540/68585/14360/225998/12801/12492/102774/225055/22772/17196/23821/269473/19156/12289/239102/23859/13198/17967/165…
GO:0022616	BP	GO:0022616	DNA strand elongation	33	-0.727121	-2.07257	1.06216e-05	0.000155357	0.000106454	1699	tags=64%, list=20%, signal=51%	140917/56456/56207/59001/20174/56505/17535/98415/19360/27354/18972/69270/67967/17220/18538/18968/16881/17217/327762/18973/17215
GO:0032409	BP	GO:0032409	regulation of transporter activity	153	0.366543	1.76749	1.11395e-05	0.00016212	0.000111088	1543	tags=39%, list=18%, signal=32%	241528/68312/12794/12295/14226/14419/108058/100503659/16485/20974/18795/238871/18189/100102/260297/14166/432442/243961/22318/58234/16502/109676/11735/216856/279561/57440/69106/19122/60597/238276/12298/81905/14697/14168/12293/15275/12297/65113/20191/13844/19699/15980/83814/75607/20617/192167/13385/12313/18693/80281/11820/237611/54377/235281/19055/11933/77574/12289/18750
GO:0016236	BP	GO:0016236	macroautophagy	178	0.347365	1.69161	1.11213e-05	0.00016212	0.000111088	3324	tags=63%, list=38%, signal=40%	211134/68728/12176/66597/227738/60599/74772/240752/11975/70381/29869/245860/170625/57436/75788/18145/21767/18412/66734/67443/209478/12313/73205/217695/56486/22084/353047/170731/67588/218035/116733/53612/74374/105513/71648/234852/66795/64143/100502841/68943/269338/67474/66270/20773/108083/320528/51897/54609/64930/66530/67526/217893/268749/69150/100504663/75747/68953/93739/94178/17281/55978/12421/6…
GO:0071478	BP	GO:0071478	cellular response to radiation	111	-0.54614	-1.82523	1.12456e-05	0.000163257	0.000111867	1658	tags=41%, list=19%, signal=34%	76293/268564/57741/72440/65964/11545/80905/20174/19355/12530/12018/13653/19367/22059/68539/14375/70238/66656/15574/98415/18148/22427/20377/11920/27015/67967/12955/224008/12144/18971/12575/18538/12190/56349/74041/60530/19361/12021/12649/19362/50883/12189/20319/13605/52033/20877
GO:0001501	BP	GO:0001501	skeletal system development	225	-0.476335	-1.66821	1.13286e-05	0.000164054	0.000112413	1274	tags=24%, list=15%, signal=21%	20683/12406/17387/12387/22059/228790/106522/17242/17260/54352/83925/244329/16973/70300/242585/102866/242687/22339/16332/68259/20377/320910/11749/54725/18081/12577/17869/20682/269941/66910/70235/18214/230484/79456/21380/11695/18129/15117/26564/116701/21873/14633/59056/18590/17127/15208/19662/20319/12832/14634/16007/14451/12822/15245/14609
GO:0045597	BP	GO:0045597	positive regulation of cell differentiation	466	-0.4195	-1.51057	1.1474e-05	0.000165748	0.000113574	1130	tags=22%, list=13%, signal=21%	18186/13631/18950/14056/106522/18813/18208/11546/14375/53605/17242/11486/17260/19716/15213/15114/15289/228839/15376/67017/106628/16973/72057/64297/19207/14082/20361/14580/12561/22339/70083/72007/67784/98733/68010/20377/19206/12400/100201/12257/320563/18080/14815/19126/66993/18081/21815/57434/17869/20682/58198/50913/13654/14733/107869/18213/18214/14268/54409/11923/18760/18712/74490/117606/68151/21…
GO:0048588	BP	GO:0048588	developmental cell growth	181	0.338781	1.67349	1.16479e-05	0.000167845	0.000115011	1107	tags=29%, list=13%, signal=26%	16728/71751/12904/76884/20450/26456/17762/18762/13193/108058/20358/68404/17756/17755/18479/20979/18187/116837/20315/15468/56320/20359/20981/234214/18846/20355/14567/17131/360213/20404/52822/20360/14168/19280/16885/214968/81907/76499/16971/29869/17984/13508/230103/75788/20980/83814/12934/319740/68585/71653/56637/236794
GO:0072088	BP	GO:0072088	nephron epithelium morphogenesis	33	-0.724114	-2.064	1.20741e-05	0.000173557	0.000118925	792	tags=48%, list=9%, signal=44%	22339/19206/12705/17869/20682/58198/21853/20681/12505/16776/15208/14634/22417/18654/14734/15205
GO:0051987	BP	GO:0051987	positive regulation of attachment of spindle microtubules to kinetochore	11	-0.88355	-2.00495	1.21265e-05	0.000173883	0.000119148	231	tags=55%, list=3%, signal=53%	16319/52276/11799/268697/229841/20877
GO:0010569	BP	GO:0010569	regulation of double-strand break repair via homologous recombination	55	-0.645425	-1.96938	1.22864e-05	0.000175744	0.000120423	1484	tags=44%, list=17%, signal=36%	74355/11545/20174/71890/56505/269400/216853/225182/237211/51869/117599/224008/12144/635253/21853/77782/60530/19891/19361/12649/19362/214763/75317/223970
GO:0061333	BP	GO:0061333	renal tubule morphogenesis	38	-0.690092	-2.01041	1.24722e-05	0.000177966	0.000121946	1027	tags=47%, list=12%, signal=42%	17260/15213/22339/19206/17869/20682/58198/21853/20681/12505/16776/15208/14634/12826/22417/18654/14734/15205
GO:0014013	BP	GO:0014013	regulation of gliogenesis	66	-0.622639	-1.94201	1.30079e-05	0.000185157	0.000126873	1214	tags=36%, list=14%, signal=32%	12387/22059/14056/107503/18208/17242/14580/269951/12257/103743/17869/50913/13654/18213/20539/104156/11921/20681/17863/15208/18128/12767/18742/15205
GO:0007129	BP	GO:0007129	homologous chromosome pairing at meiosis	18	-0.802807	-2.01532	1.32314e-05	0.000187879	0.000128739	976	tags=67%, list=11%, signal=59%	17350/72787/17535/76915/381678/19183/71846/69716/12447/12448/211651/237911
GO:2000463	BP	GO:2000463	positive regulation of excitatory postsynaptic potential	26	0.66642	2.23759	1.34552e-05	0.000190593	0.000130599	1297	tags=62%, list=15%, signal=53%	14812/18762/18189/116837/56216/56320/243961/58234/216856/12297/14810/19699/56637/192167/13385/11820
GO:0030198	BP	GO:0030198	extracellular matrix organization	109	-0.555007	-1.85123	1.35257e-05	0.000190667	0.000130649	828	tags=29%, list=10%, signal=27%	14580/102693/224697/53381/56693/208177/20682/18214/14268/54409/14595/64075/11504/12830/15117/240322/223838/12827/14114/17127/14115/18128/23871/13717/14186/20319/237360/12832/16949/16007/12826/12822
GO:0045229	BP	GO:0045229	external encapsulating structure organization	109	-0.555007	-1.85123	1.35257e-05	0.000190667	0.000130649	828	tags=29%, list=10%, signal=27%	14580/102693/224697/53381/56693/208177/20682/18214/14268/54409/14595/64075/11504/12830/15117/240322/223838/12827/14114/17127/14115/18128/23871/13717/14186/20319/237360/12832/16949/16007/12826/12822
GO:0046661	BP	GO:0046661	male sex differentiation	63	-0.625405	-1.93625	1.38746e-05	0.000194645	0.000133375	780	tags=27%, list=9%, signal=25%	53381/20377/68328/20682/56312/20674/14087/20681/228421/97165/19662/20319/12443/22417/237911/12316/14609
GO:0060291	BP	GO:0060291	long-term synaptic potentiation	57	0.511865	2.00957	1.42778e-05	0.000199821	0.000136922	1895	tags=56%, list=22%, signal=44%	14812/19339/107065/268755/18762/18212/208922/18479/116837/260297/18196/22318/58234/19122/110891/238276/70441/13844/19699/18412/56637/20617/192167/20614/11820/382056/382018/19242/12323/432530/19211/19141
GO:0051093	BP	GO:0051093	negative regulation of developmental process	477	-0.421022	-1.5156	1.46902e-05	0.0002051	0.000140539	1340	tags=25%, list=15%, signal=22%	227721/14357/20535/18053/71890/20349/29806/67071/236266/20660/13196/74762/12387/69260/232334/60406/22059/228790/18186/14056/107503/18208/52615/211652/16002/17242/19716/15213/15289/56449/15376/69064/212547/229700/242443/65079/214444/70300/245688/20361/12571/22339/72007/269951/68010/19205/27354/20377/19206/12400/100201/12257/18024/54601/242748/13433/12705/103743/18854/17869/20682/58198/50913/20602/…
GO:0050770	BP	GO:0050770	regulation of axonogenesis	129	0.396361	1.88224	1.62215e-05	0.000225939	0.000154818	1418	tags=37%, list=16%, signal=32%	16728/71751/12904/19713/21367/18039/26456/20616/17760/17762/13193/20358/17756/17755/18212/18479/20315/56320/20359/18040/75770/18846/20355/14567/360213/52822/20360/14168/19280/16885/214968/14810/16971/381979/29869/13844/13508/75788/319740/68585/71653/56637/13643/22084/330938/382253/17196/76965
GO:2000177	BP	GO:2000177	regulation of neural precursor cell proliferation	67	-0.620417	-1.9449	1.65492e-05	0.000229954	0.00015757	1339	tags=40%, list=15%, signal=34%	110829/18053/12387/22059/14707/20733/53605/17242/19716/22339/242748/66993/18008/14678/58198/56458/233064/20674/12677/14633/224171/18128/14632/20419/14634/18742/12316
GO:0009952	BP	GO:0009952	anterior/posterior pattern specification	91	-0.573586	-1.85705	1.7391e-05	0.000241078	0.000165192	1023	tags=26%, list=12%, signal=24%	15213/15376/16973/70300/20377/11920/57434/233826/55927/68151/16848/21380/11695/26564/13388/14633/17127/20878/15208/18128/20319/14634/14734/15205
GO:0042327	BP	GO:0042327	positive regulation of phosphorylation	385	-0.433855	-1.54928	1.75939e-05	0.000243313	0.000166723	934	tags=17%, list=11%, signal=16%	14176/17535/66616/64297/19360/22340/18148/20361/22359/22339/27354/71943/16367/17869/12445/20682/70891/14362/18213/12575/18214/21987/18760/18712/11600/67916/13842/12531/21380/26564/77744/109270/17311/14456/70097/14783/244058/16319/12505/18590/56742/50883/15208/20460/14186/20319/13605/52276/12443/18817/12767/23834/16007/11799/268697/229841/269582/72119/18654/14560/381293/20877/404710/15205
GO:0007099	BP	GO:0007099	centriole replication	32	-0.723905	-2.04534	1.80016e-05	0.000247776	0.000169781	1547	tags=69%, list=18%, signal=57%	319675/17245/246102/212514/101565/382406/216846/236266/72776/214444/18226/18148/219103/225659/74470/99100/70799/381644/233064/20873/12566/20460
GO:0072028	BP	GO:0072028	nephron morphogenesis	34	-0.702072	-2.0119	1.79718e-05	0.000247776	0.000169781	792	tags=47%, list=9%, signal=43%	22339/19206/12705/17869/20682/58198/21853/20681/12505/16776/15208/14634/22417/18654/14734/15205
GO:0072006	BP	GO:0072006	nephron development	63	-0.621413	-1.92389	1.85353e-05	0.000254522	0.000174404	1214	tags=48%, list=14%, signal=41%	12387/13653/228790/59015/445007/103468/17260/15213/22339/19206/19126/12705/17869/20682/58198/11600/21853/18129/16449/13388/20681/12505/16776/15208/18128/14634/22417/18654/14734/15205
GO:0016082	BP	GO:0016082	synaptic vesicle priming	21	0.700743	2.14829	1.88836e-05	0.000258696	0.000177264	2179	tags=86%, list=25%, signal=64%	19339/64051/116837/56216/27062/20910/17957/104015/20617/22249/320405/20614/382018/111173/67474/67826/78808/108124
GO:0006364	BP	GO:0006364	rRNA processing	187	-0.499565	-1.73807	1.96137e-05	0.000268069	0.000183686	3327	tags=79%, list=38%, signal=50%	227656/78581/216156/59050/19942/67949/75422/66711/67390/53414/107071/20227/66229/72198/21771/72344/100038991/27993/213773/68731/216987/229937/66161/227522/70285/67205/27966/19090/67674/103136/67994/52513/68533/105372/19989/18572/100609/215194/68845/67755/214627/75273/66489/30946/102462/68979/50912/20044/67025/19941/67222/110816/78394/64934/66181/98956/20115/104662/67493/69663/66481/67045/57294/66…
GO:0061351	BP	GO:0061351	neural precursor cell proliferation	132	-0.531981	-1.8055	1.97754e-05	0.000269647	0.000184768	1339	tags=33%, list=15%, signal=28%	110829/18992/18053/12387/22059/14707/107503/20733/53605/17242/19716/18541/22339/218820/27354/242748/26934/66993/18008/14678/58198/20602/140486/56458/11923/233064/100182/67203/20674/12677/21335/14633/224171/18128/14632/20419/14634/12767/17279/18742/15245/381293/12316
GO:0060079	BP	GO:0060079	excitatory postsynaptic potential	53	0.522795	2.02099	2.02955e-05	0.000276095	0.000189186	1511	tags=51%, list=17%, signal=42%	14812/110834/18762/108013/18189/116837/56216/56320/26875/243961/58234/216856/14806/110891/60597/12297/14810/81907/19699/56637/20238/20617/192167/13385/11820/19055/72961
GO:0010638	BP	GO:0010638	positive regulation of organelle organization	346	-0.436727	-1.55111	2.04089e-05	0.000276991	0.0001898	1303	tags=23%, list=15%, signal=20%	101565/12018/56505/226026/269400/12387/72776/27041/74682/22059/18186/51800/16002/15114/21749/75786/109168/30877/28113/56430/17535/66616/214444/70300/18226/19360/242687/219103/234344/19357/19205/27354/11920/245474/52639/68298/13433/76123/18008/13446/30954/230872/18854/11853/18213/381644/20969/17698/234094/14156/234686/59125/76561/70099/67177/20873/215387/67749/17427/14211/12566/56742/19362/17127/2…
GO:0010562	BP	GO:0010562	positive regulation of phosphorus metabolic process	427	-0.422379	-1.51201	2.06073e-05	0.00027839	0.000190758	934	tags=16%, list=11%, signal=15%	14176/17535/66616/64297/19360/22340/18148/20361/22359/22339/19205/27354/71943/56876/16367/17869/12445/20682/70891/14362/226849/18213/12575/18214/21987/18760/18712/11600/67916/13842/12531/21380/26564/77744/109270/17311/14456/70097/14783/244058/16319/12505/18590/56742/17127/50883/15208/20460/14186/20319/13605/52276/12443/18817/12767/23834/16007/11799/268697/229841/269582/72119/18654/14560/381293/20…
GO:0045937	BP	GO:0045937	positive regulation of phosphate metabolic process	427	-0.422379	-1.51201	2.06073e-05	0.00027839	0.000190758	934	tags=16%, list=11%, signal=15%	14176/17535/66616/64297/19360/22340/18148/20361/22359/22339/19205/27354/71943/56876/16367/17869/12445/20682/70891/14362/226849/18213/12575/18214/21987/18760/18712/11600/67916/13842/12531/21380/26564/77744/109270/17311/14456/70097/14783/244058/16319/12505/18590/56742/17127/50883/15208/20460/14186/20319/13605/52276/12443/18817/12767/23834/16007/11799/268697/229841/269582/72119/18654/14560/381293/20…
GO:0045740	BP	GO:0045740	positive regulation of DNA replication	35	-0.709314	-2.04494	2.14608e-05	0.000289251	0.0001982	1281	tags=46%, list=15%, signal=39%	108689/11908/12545/217578/18148/18538/237877/27214/327762/67177/12566/14633/52679/14632/12534/108961
GO:0031214	BP	GO:0031214	biomineral tissue development	63	-0.619342	-1.91747	2.18749e-05	0.000293476	0.000201096	1090	tags=37%, list=13%, signal=32%	106522/17260/15213/20937/57295/68259/58235/20682/18214/68151/21380/110789/14456/12608/21416/20181/17127/18128/67141/16007/22417/14734/14609
GO:0048729	BP	GO:0048729	tissue morphogenesis	313	-0.446992	-1.58311	2.18604e-05	0.000293476	0.000201096	1324	tags=23%, list=15%, signal=20%	237500/18053/14160/20349/236266/17387/12387/216527/226519/18186/20733/18208/17242/17260/15213/15376/16973/229700/53885/70300/14107/29876/21677/22339/67784/20377/19206/14815/12705/21815/208177/18854/17869/108156/20682/58198/14362/17698/11600/21853/68151/21380/18129/16449/26564/104156/13388/20674/72080/244058/20681/14633/20181/12505/16776/18590/17127/240641/15208/18128/20460/20319/14634/12767/16007…
GO:1990138	BP	GO:1990138	neuron projection extension	138	0.37741	1.8196	2.27038e-05	0.000303897	0.000208236	1107	tags=33%, list=13%, signal=29%	16728/71751/76884/20450/26456/17762/18762/13193/20358/68404/17756/17755/18479/20979/18187/116837/20315/56320/20359/20981/18846/20355/14567/360213/20404/52822/20360/19280/16885/214968/81907/76499/16971/29869/17984/13508/75788/20980/83814/12934/319740/68585/71653/56637/236794
GO:0007041	BP	GO:0007041	lysosomal transport	91	0.430508	1.93154	2.36356e-05	0.000315646	0.000216287	2812	tags=58%, list=32%, signal=40%	100102/53331/74772/57440/81905/16971/30948/68299/17237/14339/16553/73205/12492/353047/54377/218035/116733/77963/19156/74374/20661/105513/234852/52120/100502841/68943/269338/74018/74718/213326/66530/11776/100504663/68953/218699/67064/20615/19349/320191/68505/70827/67095/11852/228545/65114/55943/70297/76959/77573/224705/22088/15239/20955
GO:0015837	BP	GO:0015837	amine transport	44	0.544092	2.02181	2.39266e-05	0.000318076	0.000217952	1722	tags=64%, list=20%, signal=51%	11847/14812/110834/18799/19339/64051/20979/20315/20981/11444/268860/18751/20910/215113/54393/229521/12652/20980/12934/68585/18546/20617/12801/269642/65106/68943/60510/12286
GO:0051952	BP	GO:0051952	regulation of amine transport	44	0.544092	2.02181	2.39266e-05	0.000318076	0.000217952	1722	tags=64%, list=20%, signal=51%	11847/14812/110834/18799/19339/64051/20979/20315/20981/11444/268860/18751/20910/215113/54393/229521/12652/20980/12934/68585/18546/20617/12801/269642/65106/68943/60510/12286
GO:0035725	BP	GO:0035725	sodium ion transmembrane transport	60	0.50304	2.00612	2.49532e-05	0.00033097	0.000226787	1659	tags=42%, list=19%, signal=34%	20269/11419/232975/108058/18795/94249/100102/14166/21366/11735/279561/110876/69106/110891/14168/16525/83814/75607/236794/59033/18693/235281/11933/20541/75785
GO:0045669	BP	GO:0045669	positive regulation of osteoblast differentiation	38	-0.681658	-1.98584	2.50676e-05	0.000331734	0.000227311	1027	tags=37%, list=12%, signal=33%	17260/15213/16973/22339/18214/18760/16449/12608/20319/67141/14634/16007/22417/14560
GO:0030705	BP	GO:0030705	cytoskeleton-dependent intracellular transport	151	0.355959	1.6962	2.53715e-05	0.000334995	0.000229546	1651	tags=33%, list=19%, signal=27%	12794/18039/16572/17760/17762/16594/69697/18762/327814/22141/17756/17755/22142/22223/16574/18040/16593/17754/11735/360213/68724/76686/16561/81907/208158/72368/12217/17912/30957/67774/16560/228355/232946/16553/75665/71923/64933/72421/11820/16569/77963/29819/214459/13427/68196/11777/13424/67269/23859/12121
GO:0045879	BP	GO:0045879	negative regulation of smoothened signaling pathway	23	-0.768524	-2.01887	2.64679e-05	0.000347116	0.000237851	876	tags=39%, list=10%, signal=35%	19207/19206/58198/14633/14632/14634/14451/15245/14734
GO:0043062	BP	GO:0043062	extracellular structure organization	110	-0.546	-1.82683	2.64255e-05	0.000347116	0.000237851	828	tags=29%, list=10%, signal=27%	14580/102693/224697/53381/56693/208177/20682/18214/14268/54409/14595/64075/11504/12830/15117/240322/223838/12827/14114/17127/14115/18128/23871/13717/14186/20319/237360/12832/16949/16007/12826/12822
GO:0055123	BP	GO:0055123	digestive system development	55	-0.634111	-1.93485	2.67099e-05	0.000347945	0.000238419	1090	tags=36%, list=13%, signal=32%	106522/16002/11486/94192/13852/20377/12577/20682/58198/68151/11695/21416/14633/18590/17127/17863/18128/20319/14634/15205
GO:0048145	BP	GO:0048145	regulation of fibroblast proliferation	67	-0.613139	-1.92208	2.67078e-05	0.000347945	0.000238419	925	tags=36%, list=11%, signal=32%	17319/18053/67153/22059/57295/12571/66262/72007/27354/20377/21815/18854/17869/12575/18214/14268/56312/14456/14114/18590/17863/23834/12428/268697
GO:0046649	BP	GO:0046649	lymphocyte activation	320	-0.4424	-1.56648	2.69376e-05	0.000350128	0.000239915	1364	tags=26%, list=16%, signal=23%	17319/17685/14357/20535/15510/71890/17886/12018/17387/12387/13653/15452/22059/18950/14056/59009/14375/16002/51797/58208/17242/11486/17260/15289/17350/70238/52683/72057/11534/55982/16852/14082/12571/23918/27354/20377/12400/210293/17688/11920/51869/18477/66993/103743/12144/17869/12445/11987/102545/12575/17698/23882/12193/237877/16848/12010/18129/16431/17311/13388/14456/12608/225471/12578/15201/1408…
GO:0048562	BP	GO:0048562	embryonic organ morphogenesis	127	-0.527909	-1.78216	2.71141e-05	0.00035164	0.000240951	680	tags=23%, list=8%, signal=21%	18208/17260/54352/70300/21677/14051/17869/20682/73750/21380/11695/18129/320398/26564/13388/20674/11921/19712/21416/14633/17127/18128/14632/20460/19662/14634/14451/15205/14609
GO:1990778	BP	GO:1990778	protein localization to cell periphery	238	0.31516	1.6455	2.80866e-05	0.000363444	0.000249039	1493	tags=33%, list=17%, signal=28%	269116/19339/232086/665113/16480/13869/241525/18762/241263/108058/98741/22141/26414/98496/18189/56216/23969/53331/18191/668212/18196/22318/109676/20910/12361/11735/279561/57440/13483/67295/20411/19122/14251/18709/238276/76686/108030/11305/19340/26422/12889/545156/52588/16561/14168/12297/216831/14810/76499/16971/13844/65945/19062/18708/319740/18412/56637/54411/108797/16553/12048/54189/233651/13385…
GO:0072078	BP	GO:0072078	nephron tubule morphogenesis	32	-0.718944	-2.03132	2.92019e-05	0.000376209	0.000257786	792	tags=47%, list=9%, signal=43%	22339/19206/17869/20682/58198/21853/20681/12505/16776/15208/14634/22417/18654/14734/15205
GO:0051937	BP	GO:0051937	catecholamine transport	33	0.606835	2.11022	2.97607e-05	0.000382563	0.00026214	1913	tags=73%, list=22%, signal=57%	18799/19339/20979/20315/20981/27062/11444/268860/18751/58994/54393/229521/12652/20980/68585/18546/20617/12801/243328/269642/68943/60510/11461/17069
GO:0000076	BP	GO:0000076	DNA replication checkpoint signaling	13	-0.850967	-1.99212	3.05137e-05	0.00039138	0.000268182	536	tags=85%, list=6%, signal=80%	19367/15574/235559/66131/21853/327762/67177/18392/77011/23834/269582
GO:1900262	BP	GO:1900262	regulation of DNA-directed DNA polymerase activity	13	-0.850029	-1.98993	3.1794e-05	0.000404247	0.000276999	915	tags=85%, list=11%, signal=76%	19718/18148/69263/69270/106344/72151/272551/78833/18538/214901/72107
GO:1900264	BP	GO:1900264	positive regulation of DNA-directed DNA polymerase activity	13	-0.850029	-1.98993	3.1794e-05	0.000404247	0.000276999	915	tags=85%, list=11%, signal=76%	19718/18148/69263/69270/106344/72151/272551/78833/18538/214901/72107
GO:2001257	BP	GO:2001257	regulation of cation channel activity	71	0.454595	1.91421	3.17877e-05	0.000404247	0.000276999	1300	tags=38%, list=15%, signal=33%	241528/68312/12295/14226/14419/100503659/16485/238871/14166/432442/22318/16502/109676/11735/57440/69106/238276/12298/14697/14168/12293/12297/83814/12313/18693/11820/237611
GO:0035315	BP	GO:0035315	hair cell differentiation	26	-0.746116	-2.00147	3.26501e-05	0.00041423	0.000283839	433	tags=42%, list=5%, signal=40%	226519/15213/270893/73750/16449/13388/11921/19712/15208/18128/15205
GO:0072659	BP	GO:0072659	protein localization to plasma membrane	184	0.343235	1.67358	3.36329e-05	0.000425773	0.000291749	1648	tags=33%, list=19%, signal=27%	269116/19339/232086/665113/16480/241525/18762/241263/108058/98741/98496/18189/23969/53331/668212/18196/22318/109676/20910/12361/11735/279561/57440/13483/67295/20411/19122/14251/18709/238276/76686/19340/52588/14168/12297/216831/76499/16971/13844/19062/18708/319740/18412/54411/16553/12048/233651/20742/68767/237611/56224/18483/235281/116733/65106/11933/53612/71648/213760/13649/12323
GO:0140029	BP	GO:0140029	exocytic process	64	0.483538	1.94514	3.37284e-05	0.000426058	0.000291944	2194	tags=61%, list=25%, signal=46%	19339/64051/20979/116837/56216/27062/26875/22318/14681/20910/67295/76787/19340/12889/17957/12287/75914/20980/104015/20617/22249/320405/192167/20614/102058/382018/67808/111173/64143/17967/60510/67474/14809/69150/53413/67826/78808/108124/20615
GO:0071479	BP	GO:0071479	cellular response to ionizing radiation	56	-0.628546	-1.91853	3.41423e-05	0.000430356	0.000294889	1213	tags=46%, list=14%, signal=40%	13653/19367/22059/68539/14375/66656/15574/98415/22427/20377/11920/12955/224008/12144/12575/12190/56349/74041/60530/19361/12021/19362/50883/12189/20319/13605
GO:1905456	BP	GO:1905456	regulation of lymphoid progenitor cell differentiation	11	-0.869444	-1.97294	3.42943e-05	0.000431339	0.000295562	144	tags=55%, list=2%, signal=54%	268564/68219/15208/18128/15205/234396
GO:0071214	BP	GO:0071214	cellular response to abiotic stimulus	157	-0.504557	-1.73351	3.45239e-05	0.000432364	0.000296265	1584	tags=36%, list=18%, signal=30%	57741/72440/18810/65964/11545/80905/20174/19355/12530/12018/12387/13653/19367/22059/98363/68539/14375/100604/56449/70238/66656/15574/98415/18148/22427/20377/56876/11920/27015/67967/11677/12955/224008/12144/20682/18971/20528/12575/18538/12190/56349/74041/60530/19712/19361/12021/12649/19362/50883/12189/20319/13605/52033/20877/12192/14609
GO:0104004	BP	GO:0104004	cellular response to environmental stimulus	157	-0.504557	-1.73351	3.45239e-05	0.000432364	0.000296265	1584	tags=36%, list=18%, signal=30%	57741/72440/18810/65964/11545/80905/20174/19355/12530/12018/12387/13653/19367/22059/98363/68539/14375/100604/56449/70238/66656/15574/98415/18148/22427/20377/56876/11920/27015/67967/11677/12955/224008/12144/20682/18971/20528/12575/18538/12190/56349/74041/60530/19712/19361/12021/12649/19362/50883/12189/20319/13605/52033/20877/12192/14609
GO:0071805	BP	GO:0071805	potassium ion transmembrane transport	82	0.438289	1.92556	3.51271e-05	0.000438976	0.000300795	1107	tags=35%, list=13%, signal=31%	241528/60613/14419/232975/98741/16485/16526/72258/223604/94249/16519/16522/211468/432442/22318/16502/109676/11735/279561/13483/19122/16504/83704/16536/16525/30948/83814/75607/236794
GO:0071774	BP	GO:0071774	response to fibroblast growth factor	43	-0.666496	-1.98199	3.54653e-05	0.000441313	0.000302397	1389	tags=47%, list=16%, signal=39%	29875/18053/399558/12387/74360/219134/14176/70300/20377/14733/12193/21380/116701/21416/12505/14186/20419/22417/15245/12192
GO:0002244	BP	GO:0002244	hematopoietic progenitor cell differentiation	93	-0.560009	-1.82309	3.54333e-05	0.000441313	0.000302397	1688	tags=33%, list=19%, signal=27%	19261/268564/20466/78697/68219/12043/15526/20683/74206/83964/22059/59014/15289/12571/22339/20377/18024/16498/17349/23828/17311/330662/19712/17863/15208/18128/68743/15205/234396/71988/21973
GO:0097150	BP	GO:0097150	neuronal stem cell population maintenance	23	-0.763875	-2.00666	3.59885e-05	0.00044687	0.000306205	533	tags=48%, list=6%, signal=45%	140486/56458/233064/13388/20674/171167/19712/15208/211651/12316/15205
GO:2000779	BP	GO:2000779	regulation of double-strand break repair	101	-0.550488	-1.81606	3.66e-05	0.000453498	0.000310746	1484	tags=32%, list=17%, signal=27%	74355/11545/20174/71890/56505/269400/18294/216853/72057/225182/237211/51869/117599/66993/381678/224008/12144/18854/635253/110052/21853/77782/60530/19891/19361/12649/19362/14235/214763/75317/223970/69885
GO:0031346	BP	GO:0031346	positive regulation of cell projection organization	304	0.28434	1.50116	3.91278e-05	0.000482769	0.000330804	1418	tags=28%, list=16%, signal=24%	104252/22240/16728/71751/12904/19713/50769/20257/14226/18039/665113/234593/20713/20616/17760/17762/73710/13193/15572/234267/11785/77480/17755/18212/18479/18189/71951/241514/103967/16570/20315/13803/23969/56320/269397/234695/67287/18846/225849/11789/14567/12361/18010/330863/52822/238276/103199/75769/68732/545156/16885/14810/16971/13844/19699/12805/13508/103742/75788/18708/13544/66573/319740/14360/…
GO:0080135	BP	GO:0080135	regulation of cellular response to stress	466	-0.41023	-1.47719	3.90467e-05	0.000482769	0.000330804	1711	tags=28%, list=20%, signal=23%	22031/26992/19261/223527/64209/30940/56456/76893/13806/63953/99470/114715/11350/22385/215653/56207/17873/70686/65964/18007/74355/68145/11545/19766/226182/20174/73419/17319/71890/22166/12018/66073/56505/20747/269400/12387/19367/11692/67153/209027/22059/18294/98363/76892/18950/59009/51800/216853/67872/15289/70681/56449/22594/20937/70238/72057/55982/225182/15939/65079/22350/18148/230899/17318/16906/…
GO:0042491	BP	GO:0042491	inner ear auditory receptor cell differentiation	23	-0.760794	-1.99856	4.09506e-05	0.000502074	0.000344032	410	tags=39%, list=5%, signal=37%	15213/73750/16449/13388/11921/19712/15208/18128/15205
GO:0019233	BP	GO:0019233	sensory perception of pain	46	0.545235	2.06979	4.14497e-05	0.000507129	0.000347495	1722	tags=61%, list=20%, signal=49%	20269/14812/17391/270190/16485/14816/20315/22223/11444/216856/12290/215210/18082/12287/12297/14810/17984/68585/14360/12801/23821/239102/23859/17967/16592/66270/17035/12286
GO:0043269	BP	GO:0043269	regulation of monoatomic ion transport	251	0.304684	1.585	4.20091e-05	0.000511828	0.000350715	1547	tags=35%, list=18%, signal=29%	241528/68312/20269/12295/60613/319984/14226/12721/14419/108058/98741/100503659/16485/18795/238871/100102/20315/14166/16519/16522/211468/109305/432442/22318/58234/16502/109676/14681/12361/11735/279561/110876/12724/57440/12288/13483/19165/69106/19122/12290/238276/16504/12298/269513/81905/16536/14697/14168/12293/15275/12287/12297/14810/67149/20191/13844/19699/15980/12805/72828/16170/19062/12913/3094…
GO:0022898	BP	GO:0022898	regulation of transmembrane transporter activity	147	0.358505	1.7219	4.33229e-05	0.000526734	0.000360929	1543	tags=38%, list=18%, signal=32%	241528/68312/12794/12295/14226/14419/108058/100503659/16485/18795/238871/18189/100102/260297/14166/432442/243961/22318/58234/16502/109676/11735/216856/279561/57440/69106/19122/60597/238276/12298/81905/14697/14168/12293/15275/12297/20191/13844/19699/15980/83814/75607/20617/192167/13385/12313/18693/11820/237611/54377/235281/19055/11933/77574/12289/18750
GO:0002181	BP	GO:0002181	cytoplasmic translation	124	-0.523959	-1.76756	4.3751e-05	0.000529993	0.000363162	2729	tags=75%, list=31%, signal=52%	27050/27176/76808/13211/76846/20044/67025/19941/66632/19981/20115/54709/68193/14109/19944/54217/66481/20088/100503670/234734/19988/18746/56403/22186/19921/54127/268449/319195/20005/66480/68052/19933/100042823/27207/19946/114641/20090/20103/26451/67248/57808/65019/20054/14265/13669/22608/20116/267019/19943/67097/270106/66475/20104/67186/20068/20102/26961/75617/11837/51810/19951/67891/67204/20091/1…
GO:0009913	BP	GO:0009913	epidermal cell differentiation	69	-0.590549	-1.85237	4.56153e-05	0.000551161	0.000377667	2056	tags=51%, list=24%, signal=39%	26395/216560/18109/67996/223828/19878/72333/433759/14182/12633/18810/14284/16918/226519/67694/14056/56338/58208/15213/286940/19207/29876/19206/270893/73750/16449/13388/11921/19712/14633/15208/18128/14632/15205/12192
GO:0001934	BP	GO:0001934	positive regulation of protein phosphorylation	353	-0.43169	-1.53453	4.71953e-05	0.000569073	0.000389941	934	tags=17%, list=11%, signal=16%	14176/17535/66616/64297/19360/22340/18148/20361/22359/22339/27354/71943/12445/20682/70891/14362/18213/12575/18214/21987/18760/18712/11600/67916/12531/21380/26564/77744/109270/17311/14456/70097/244058/16319/12505/18590/56742/50883/15208/20460/20319/13605/52276/12443/18817/12767/23834/16007/11799/268697/229841/269582/72119/18654/14560/381293/20877/404710/15205
GO:0006298	BP	GO:0006298	mismatch repair	21	-0.769388	-1.99849	4.81674e-05	0.000577217	0.000395521	1590	tags=71%, list=18%, signal=59%	17686/17685/68209/67153/68240/227099/15289/17350/71567/69724/17688/68275/18538/19891/26909
GO:0048489	BP	GO:0048489	synaptic vesicle transport	39	0.556358	2.01534	4.87396e-05	0.000581685	0.000398583	1580	tags=51%, list=18%, signal=42%	12794/19339/16572/20616/17756/103967/16574/360213/108030/108012/67774/12934/104015/228355/232946/20617/192167/64933/13429/11777
GO:0048675	BP	GO:0048675	axon extension	99	0.401867	1.81526	4.87071e-05	0.000581685	0.000398583	1107	tags=34%, list=13%, signal=30%	16728/71751/26456/17762/13193/20358/17756/17755/18479/18187/20315/56320/20359/18846/20355/14567/360213/52822/20360/19280/16885/214968/76499/16971/29869/17984/13508/75788/12934/319740/68585/71653/56637/236794
GO:1904064	BP	GO:1904064	positive regulation of cation transmembrane transport	74	0.450736	1.91505	4.96713e-05	0.000591595	0.000405373	1900	tags=43%, list=22%, signal=34%	241528/68312/14419/16485/18795/432442/16502/109676/11735/279561/57440/12288/13483/238276/12298/12293/12297/14810/20191/83814/75607/20617/12313/237611/19055/11933/12289/76055/16150/100986/12315/14062
GO:0044344	BP	GO:0044344	cellular response to fibroblast growth factor stimulus	40	-0.688403	-2.0147	5.01241e-05	0.000595773	0.000408236	1389	tags=50%, list=16%, signal=42%	29875/18053/399558/12387/74360/219134/14176/70300/20377/14733/12193/21380/116701/21416/12505/14186/20419/22417/15245/12192
GO:2000179	BP	GO:2000179	positive regulation of neural precursor cell proliferation	40	-0.687635	-2.01245	5.22877e-05	0.000618968	0.00042413	1320	tags=50%, list=15%, signal=43%	18053/12387/14707/53605/17242/19716/22339/242748/66993/18008/14678/233064/20674/14633/224171/18128/14632/14634/18742/12316
GO:0009314	BP	GO:0009314	response to radiation	251	-0.451565	-1.59046	5.24023e-05	0.000619068	0.000424198	1213	tags=27%, list=14%, signal=24%	20174/19355/17685/12530/22166/12018/13653/19367/22059/18294/18950/68539/18628/14375/70681/75786/70238/66656/15574/55982/98415/18148/17193/22427/20377/17688/11920/27015/67967/12955/72565/224008/12144/57434/18854/17869/18971/226409/235559/58186/12575/230484/66131/18538/12190/56349/74041/60530/12369/76843/11810/19361/12021/12649/623474/19362/19366/50883/12189/19662/20319/13605/77011/12443/211651/680…
GO:0000731	BP	GO:0000731	DNA synthesis involved in DNA repair	23	-0.757155	-1.989	5.31971e-05	0.000627189	0.000429763	795	tags=52%, list=9%, signal=48%	22427/18972/27015/67967/18971/18538/20133/18968/18973/18974/76843/68026
GO:0007281	BP	GO:0007281	germ cell development	128	-0.518673	-1.75386	5.42634e-05	0.00063847	0.000437493	1363	tags=27%, list=16%, signal=23%	17685/14160/15512/12593/236266/14088/83964/12387/69260/74360/17242/17350/53975/11920/54004/26920/70891/67374/12190/74041/214901/12531/69716/17311/104156/56296/17427/20878/97165/67141/12767/268697/22417/237911/12316
GO:0009124	BP	GO:0009124	nucleoside monophosphate biosynthetic process	33	-0.698016	-1.98961	5.68423e-05	0.000666128	0.000456445	1736	tags=67%, list=20%, signal=54%	18103/56749/80914/13178/11564/14450/15452/18950/11486/19139/11534/237823/23918/67054/69719/22247/231327/110074/110639/22171/20425/21877
GO:0045596	BP	GO:0045596	negative regulation of cell differentiation	349	-0.436737	-1.55151	5.85639e-05	0.000684927	0.000469326	1138	tags=23%, list=13%, signal=21%	228790/18186/14056/107503/18208/52615/16002/17242/19716/15213/15289/15376/69064/212547/229700/65079/214444/70300/20361/12571/22339/72007/269951/68010/19205/27354/20377/19206/12400/100201/12257/18024/54601/242748/13433/12705/103743/17869/20682/58198/50913/20602/227292/18213/70433/56458/239114/67628/12193/81703/12010/21380/110789/16449/21873/171170/13388/20674/11921/19712/21416/12578/244058/12677/2…
GO:0044057	BP	GO:0044057	regulation of system process	264	0.294073	1.49607	5.90529e-05	0.000689265	0.000472299	1213	tags=28%, list=14%, signal=25%	11847/14427/14812/12794/108015/110834/12295/668940/14226/16480/18012/19277/14419/18762/75605/108058/21833/16485/108013/238871/18479/18189/14816/116837/56216/228836/18190/56320/26875/11444/243961/58234/268860/109676/14681/216856/279561/57440/12288/17131/14806/110891/94185/12290/67731/18585/103199/13052/240672/14168/12293/12287/12297/14810/81907/30937/20191/15357/19699/20536/12652/19062/18708/30948…
GO:0097061	BP	GO:0097061	dendritic spine organization	77	0.440967	1.89455	5.92556e-05	0.00069025	0.000472974	2060	tags=47%, list=24%, signal=36%	14812/270190/56013/327814/241514/103967/12569/56320/243961/58234/12361/19122/545156/216831/14810/13844/19699/18163/16560/14360/241638/192167/13385/18693/11820/170731/11487/29819/12323/64451/11352/66713/19211/19141/228880/13043
GO:0006813	BP	GO:0006813	potassium ion transport	96	0.407225	1.8426	6.27101e-05	0.000729036	0.000499551	1107	tags=33%, list=13%, signal=29%	241528/60613/14419/232975/98741/16485/16526/72258/223604/94249/16519/16522/211468/432442/22318/16502/109676/11735/279561/13483/19122/58802/238276/16504/83704/16536/16525/30948/83814/75607/14682/236794
GO:0072073	BP	GO:0072073	kidney epithelium development	62	-0.607301	-1.87523	6.32802e-05	0.000734201	0.00050309	792	tags=45%, list=9%, signal=41%	243931/12387/228790/17260/15213/22339/20377/19206/19126/12705/17869/20682/58198/21853/18129/16449/13388/20681/12505/16776/17127/15208/18128/14634/22417/18654/14734/15205
GO:0140236	BP	GO:0140236	translation at presynapse	47	-0.640213	-1.92355	6.42379e-05	0.000739432	0.000506674	2780	tags=98%, list=32%, signal=67%	67671/110954/68436/19989/27176/66489/20044/19941/67281/19981/68193/19944/54217/57294/20088/100503670/19988/22186/54127/268449/319195/20005/66480/27207/20103/26451/57808/65019/267019/19943/67097/270106/67186/26961/19951/67891/19896/22121/78294/27370/19934/20055/19982/20042/269261/67115
GO:0140241	BP	GO:0140241	translation at synapse	47	-0.640213	-1.92355	6.42379e-05	0.000739432	0.000506674	2780	tags=98%, list=32%, signal=67%	67671/110954/68436/19989/27176/66489/20044/19941/67281/19981/68193/19944/54217/57294/20088/100503670/19988/22186/54127/268449/319195/20005/66480/27207/20103/26451/57808/65019/267019/19943/67097/270106/67186/26961/19951/67891/19896/22121/78294/27370/19934/20055/19982/20042/269261/67115
GO:0140242	BP	GO:0140242	translation at postsynapse	47	-0.640213	-1.92355	6.42379e-05	0.000739432	0.000506674	2780	tags=98%, list=32%, signal=67%	67671/110954/68436/19989/27176/66489/20044/19941/67281/19981/68193/19944/54217/57294/20088/100503670/19988/22186/54127/268449/319195/20005/66480/27207/20103/26451/57808/65019/267019/19943/67097/270106/67186/26961/19951/67891/19896/22121/78294/27370/19934/20055/19982/20042/269261/67115
GO:0051966	BP	GO:0051966	regulation of synaptic transmission, glutamatergic	44	0.525819	1.95391	6.53875e-05	0.000751184	0.000514727	1664	tags=52%, list=19%, signal=42%	14812/18212/14802/20979/18189/14816/58234/20910/216856/14806/60597/81905/14810/94190/19699/12801/192167/14800/54377/67808/67979/13649/229791
GO:0008333	BP	GO:0008333	endosome to lysosome transport	52	0.509894	1.96468	6.56543e-05	0.000751291	0.0005148	2812	tags=71%, list=32%, signal=48%	53331/81905/30948/17237/14339/16553/54377/218035/116733/77963/74374/20661/105513/234852/100502841/269338/74718/213326/66530/11776/100504663/68953/218699/67064/20615/19349/320191/70827/67095/11852/228545/55943/76959/77573/22088/15239/20955
GO:0007423	BP	GO:0007423	sensory organ development	284	-0.443352	-1.56759	6.56511e-05	0.000751291	0.0005148	1293	tags=26%, list=15%, signal=23%	14160/12018/20683/74206/236266/12387/269831/216527/18186/18208/58208/15213/15289/234740/228839/54352/16973/18541/69675/216274/53885/70300/14107/260305/29876/22339/14051/19126/66993/18081/12577/21815/12955/58235/17869/80837/20682/20664/15444/18213/11923/67628/270893/73750/64075/21380/18129/320398/110789/16449/26564/195727/17216/13388/20674/11921/19712/12677/20681/14633/20181/17127/270120/15208/181…
GO:0098930	BP	GO:0098930	axonal transport	55	0.491093	1.89735	6.99482e-05	0.000795746	0.000545262	2779	tags=71%, list=32%, signal=49%	12794/18039/16572/17760/17756/22223/16574/17754/11735/360213/68724/16561/81907/12217/30957/67774/16560/228355/232946/64933/68196/11777/13424/67269/23859/11776/20615/16568/73689/70827/67095/11775/18472/56444/71703/216344/17828/18457/13518
GO:2000573	BP	GO:2000573	positive regulation of DNA biosynthetic process	56	-0.618748	-1.88862	7.13395e-05	0.000806855	0.000552874	1214	tags=43%, list=14%, signal=37%	12387/11692/216853/19718/18148/69263/234344/22339/11920/245474/69270/17869/106344/72151/272551/78833/18538/59125/214901/72107/14186/18005/20877/18761
GO:0090224	BP	GO:0090224	regulation of spindle organization	34	-0.677625	-1.94184	7.40581e-05	0.000832762	0.000570625	887	tags=35%, list=10%, signal=32%	73420/18226/219103/76123/77744/21335/56742/20460/54141/18817/209737/72119
GO:0048565	BP	GO:0048565	digestive tract development	48	-0.637575	-1.92086	7.44911e-05	0.000836019	0.000572858	1090	tags=38%, list=13%, signal=33%	12387/106522/11486/94192/13852/20377/20682/58198/11695/21416/14633/18590/17127/17863/18128/20319/14634/15205
GO:0043270	BP	GO:0043270	positive regulation of monoatomic ion transport	115	0.387075	1.81633	7.46826e-05	0.00083656	0.000573228	1773	tags=38%, list=20%, signal=31%	241528/68312/14419/16485/18795/20315/109305/432442/58234/16502/109676/12361/11735/279561/57440/12288/13483/238276/12298/81905/12293/12297/14810/20191/13844/19699/15980/12805/12913/83814/75607/20617/12313/237611/54377/235281/19055/11933/77574/12289/76055/68943/16150/100986
GO:0006301	BP	GO:0006301	postreplication repair	22	-0.751659	-1.96576	7.57036e-05	0.000846372	0.000579951	1734	tags=68%, list=20%, signal=55%	67711/268564/80905/17685/71890/18972/27015/67967/18971/58186/18538/18974/76843/12189/68026
GO:0000727	BP	GO:0000727	double-strand break repair via break-induced replication	11	-0.856846	-1.94435	7.67302e-05	0.000856209	0.000586692	641	tags=82%, list=7%, signal=76%	12545/17220/272551/17217/17216/17218/12544/17219/17215
GO:0051446	BP	GO:0051446	positive regulation of meiotic cell cycle	16	-0.792508	-1.93828	7.72504e-05	0.00085815	0.000588022	392	tags=44%, list=5%, signal=42%	12531/16848/19362/12532/67141/22417/14609
GO:0007224	BP	GO:0007224	smoothened signaling pathway	102	-0.540984	-1.78797	7.71618e-05	0.00085815	0.000588022	1014	tags=25%, list=12%, signal=22%	234740/15376/70300/19207/219103/68259/20377/19206/58198/269941/104732/117606/72507/26564/67009/14633/59056/15208/14632/20460/14634/14451/15245/14734/15205
GO:0016188	BP	GO:0016188	synaptic vesicle maturation	22	0.67307	2.10002	7.99396e-05	0.000885251	0.000606592	2326	tags=86%, list=27%, signal=63%	19339/20910/11975/11973/54411/22249/13385/11972/108664/11966/382018/76252/72961/66144/73834/20615/70495/11964/66335
GO:0021983	BP	GO:0021983	pituitary gland development	12	-0.850391	-1.95923	8.08098e-05	0.000891505	0.000610878	287	tags=50%, list=3%, signal=48%	20674/21416/14633/14632/22417/15205
GO:1902414	BP	GO:1902414	protein localization to cell junction	89	0.409875	1.83084	8.06656e-05	0.000891505	0.000610878	1502	tags=44%, list=17%, signal=37%	665113/16572/13869/17762/18762/26414/18189/56216/232370/18190/16574/26875/18191/243961/18196/22318/16593/17754/216856/26422/12889/545156/216831/14810/12217/19699/65945/26420/30957/56637/224997/192167/13385/20614/16451/11465/11496/11487/29819
GO:2001259	BP	GO:2001259	positive regulation of cation channel activity	36	0.571609	2.02528	8.11739e-05	0.000893832	0.000612472	1414	tags=47%, list=16%, signal=40%	241528/68312/14419/16485/432442/16502/109676/11735/57440/238276/12298/12293/12297/83814/12313/237611/19055
GO:0030856	BP	GO:0030856	regulation of epithelial cell differentiation	64	-0.597229	-1.8544	8.23792e-05	0.000905395	0.000620395	1106	tags=33%, list=13%, signal=29%	12387/14056/15213/19207/22339/19206/19126/12705/12577/20682/58198/16449/13388/20674/11921/12608/15208/18128/12443/15205/12192
GO:0002028	BP	GO:0002028	regulation of sodium ion transport	49	0.509324	1.94796	8.44576e-05	0.000926494	0.000634853	1747	tags=41%, list=20%, signal=33%	108058/18795/100102/14166/11735/279561/69106/269513/14168/67149/12805/83814/75607/58237/18693/235281/11933/20541/75785/16150
GO:0060675	BP	GO:0060675	ureteric bud morphogenesis	30	-0.708573	-1.96791	8.79602e-05	0.000961303	0.000658705	792	tags=47%, list=9%, signal=43%	22339/19206/17869/20682/58198/21853/20681/12505/16776/14634/22417/18654/14734/15205
GO:0072171	BP	GO:0072171	mesonephric tubule morphogenesis	30	-0.708573	-1.96791	8.79602e-05	0.000961303	0.000658705	792	tags=47%, list=9%, signal=43%	22339/19206/17869/20682/58198/21853/20681/12505/16776/14634/22417/18654/14734/15205
GO:0009411	BP	GO:0009411	response to UV	105	-0.538666	-1.78955	8.92126e-05	0.000971352	0.00066559	1706	tags=37%, list=20%, signal=30%	15312/76293/268564/57741/72440/65964/12043/11545/80905/20174/17685/12530/12018/22059/70238/15574/18148/22427/17688/27015/67967/72565/18854/18971/226409/58186/12575/230484/66131/18538/12190/74041/12369/76843/12649/12443/68026/52033/20877
GO:0010390	BP	GO:0010390	histone monoubiquitination	18	-0.773317	-1.94129	8.96575e-05	0.000974379	0.000667664	438	tags=39%, list=5%, signal=37%	70238/12190/76073/19361/12021/12189/18140
GO:1902751	BP	GO:1902751	positive regulation of cell cycle G2/M phase transition	28	-0.720897	-1.96983	9.14113e-05	0.000989752	0.000678198	997	tags=54%, list=11%, signal=48%	12545/18148/16906/114714/66993/20133/237877/12531/19363/76843/12532/67141/12443/268697/12534
GO:0090150	BP	GO:0090150	establishment of protein localization to membrane	172	0.323782	1.56962	9.20018e-05	0.000994301	0.000681315	2812	tags=44%, list=32%, signal=30%	12295/192950/27008/26414/18479/170770/56216/12569/225362/18196/229801/22318/14567/11735/85308/19122/238276/194309/208884/12889/12297/216831/65945/19062/218544/18145/52250/14360/68818/18633/54411/16553/75219/20614/20742/68767/22084/56428/77574/71648/76055/213760/67979/12484/12122/19298/11652/67826/108155/19349/69773/56715/12328/53869/19325/68032/17356/19326/106572/12988/19305/20813/74117/12568/664…
GO:0042490	BP	GO:0042490	mechanoreceptor differentiation	38	-0.658184	-1.91745	9.25213e-05	0.000998067	0.000683896	518	tags=29%, list=6%, signal=27%	18213/270893/73750/110789/16449/13388/11921/19712/15208/18128/15205
GO:0060993	BP	GO:0060993	kidney morphogenesis	39	-0.663524	-1.93541	9.50673e-05	0.00102364	0.000701419	1243	tags=51%, list=14%, signal=44%	243931/12387/228790/15213/22339/19206/12705/17869/20682/58198/21853/20681/12505/16776/15208/14634/22417/18654/14734/15205
GO:0007416	BP	GO:0007416	synapse assembly	128	0.364458	1.72915	9.52795e-05	0.00102404	0.00070169	1584	tags=41%, list=18%, signal=34%	14432/107065/270190/20450/14395/13869/17762/56013/211134/234267/18212/18189/103967/232370/18190/26875/18191/11444/58234/216856/14406/238276/93887/14168/19280/319387/11519/14810/13642/13844/12217/19699/65945/272381/14270/18708/15569/80749/16981/56637/241638/20617/192167/13643/53378/11820/105689/76965/29819/18750/20743/320840
GO:0010824	BP	GO:0010824	regulation of centrosome duplication	38	-0.656735	-1.91323	9.68923e-05	0.00103945	0.000712256	1603	tags=53%, list=18%, signal=43%	103573/319675/26425/17245/212514/236266/72776/214444/18226/18148/219103/225659/70799/74335/70235/20873/100502766/12449/209334/20460
GO:0070167	BP	GO:0070167	regulation of biomineral tissue development	36	-0.679631	-1.97032	9.7143e-05	0.00104023	0.000712788	1090	tags=44%, list=13%, signal=39%	106522/17260/15213/20937/20682/18214/110789/14456/12608/20181/17127/18128/67141/16007/22417/14609
GO:0002320	BP	GO:0002320	lymphoid progenitor cell differentiation	16	-0.787081	-1.925	9.88048e-05	0.00105416	0.000722332	144	tags=44%, list=2%, signal=43%	268564/68219/12043/15208/18128/15205/234396
GO:0021915	BP	GO:0021915	neural tube development	126	-0.518646	-1.75112	0.000102159	0.00108598	0.000744133	883	tags=18%, list=10%, signal=17%	70300/21677/20377/19206/21815/108156/58198/66910/14362/72507/21416/244058/236539/14633/240641/15208/18128/20460/20319/14634/14451/15205/12192
GO:0060627	BP	GO:0060627	regulation of vesicle-mediated transport	326	0.269956	1.43707	0.000102065	0.00108598	0.000744133	1903	tags=38%, list=22%, signal=31%	23892/19339/12721/107065/69938/234593/20616/19152/13193/100503659/327814/22141/16443/72685/207227/11981/20977/20979/18189/100102/116837/56216/12569/23969/109689/20981/227738/27062/26875/20964/74772/22318/18751/20597/20910/27403/12361/11735/67295/20404/14251/58994/12290/238276/76686/12298/11305/19340/242662/229521/72194/12889/17957/12287/216831/76338/22248/94190/76499/13642/16971/16423/12217/18645…
GO:0006897	BP	GO:0006897	endocytosis	318	0.273183	1.46635	0.000106672	0.00112779	0.000772783	1651	tags=35%, list=19%, signal=29%	23892/140580/21367/11803/107065/20616/13193/497097/170758/22141/27008/73094/16443/72685/100503185/11981/20977/20979/100102/219149/103967/23969/109689/227738/22318/109676/20597/27403/11735/216856/57440/20404/14251/107767/74270/238276/76686/11305/81905/229521/214897/68732/17957/81907/22248/94190/13642/16971/58194/29809/16423/170625/12476/66914/20980/18145/30948/83814/12934/104015/52898/20779/19341/…
GO:0061053	BP	GO:0061053	somite development	45	-0.642927	-1.91231	0.000111517	0.00117687	0.000806417	755	tags=44%, list=9%, signal=41%	12166/217011/226352/234865/22059/15376/20377/19206/11920/57434/108156/233826/16848/26564/19363/13388/17127/18128/20319/22417
GO:0097120	BP	GO:0097120	receptor localization to synapse	57	0.479375	1.88201	0.000120856	0.00126855	0.000869239	1488	tags=53%, list=17%, signal=44%	12794/665113/16572/13869/18762/26414/18189/56216/56320/53331/16574/18191/18196/22318/77531/81905/26422/12889/545156/216831/19699/65945/56637/192167/13385/20614/16569/11496/54377/11487
GO:0007140	BP	GO:0007140	male meiotic nuclear division	26	-0.72027	-1.93213	0.000125723	0.00131727	0.00090262	1282	tags=62%, list=15%, signal=53%	15512/69260/64707/17350/114714/11920/70891/12190/214901/69716/17864/60530/14087/19361/228421/68549
GO:0072091	BP	GO:0072091	regulation of stem cell proliferation	40	-0.671907	-1.96642	0.000126835	0.00132654	0.00090897	1214	tags=40%, list=14%, signal=35%	12387/22059/20672/12580/19206/20682/18712/12447/17311/14114/14633/97165/14235/18128/14634/12192
GO:1902808	BP	GO:1902808	positive regulation of cell cycle G1/S phase transition	37	-0.671194	-1.95614	0.000127325	0.00132928	0.000910852	1280	tags=43%, list=15%, signal=37%	28036/72776/14056/219103/12445/105837/18214/67628/20133/11504/27214/14632/20460/12443/20135/71878
GO:0051932	BP	GO:0051932	synaptic transmission, GABAergic	34	0.570279	1.99765	0.000129559	0.00134539	0.000921886	684	tags=38%, list=8%, signal=35%	242425/227120/14395/13869/170758/18479/18189/232370/20910/216856/170571/14406/54393
GO:0000729	BP	GO:0000729	DNA double-strand break processing	14	-0.810876	-1.92142	0.000129369	0.00134539	0.000921886	921	tags=57%, list=11%, signal=51%	17535/225182/19360/27354/117599/12144/327762/237911
GO:0045910	BP	GO:0045910	negative regulation of DNA recombination	30	-0.701275	-1.94765	0.000131564	0.00136136	0.000932829	1590	tags=60%, list=18%, signal=49%	17686/74355/17685/71890/269400/17350/17688/237211/51869/117599/12144/226409/58186/77782/214763/75317/223970/234396
GO:0006282	BP	GO:0006282	regulation of DNA repair	165	-0.48447	-1.66951	0.000134979	0.00139422	0.000955349	1484	tags=27%, list=17%, signal=23%	74355/11545/226182/20174/71890/56505/269400/18294/18950/216853/15289/70681/22594/20937/70238/72057/225182/237211/51869/14051/117599/66993/381678/224008/12144/18854/230484/635253/18538/110052/21853/77782/60530/19891/19361/12021/12649/19362/14235/214763/75317/12189/223970/69885
GO:0030857	BP	GO:0030857	negative regulation of epithelial cell differentiation	26	-0.719215	-1.9293	0.000139606	0.00143947	0.000986357	1214	tags=46%, list=14%, signal=40%	12387/14056/22339/12705/20682/58198/16449/13388/15208/18128/12443/15205
GO:0045165	BP	GO:0045165	cell fate commitment	113	-0.518847	-1.73935	0.000149899	0.00154016	0.00105535	1214	tags=31%, list=14%, signal=27%	12387/22059/20672/13592/58208/17260/15376/19207/245688/20377/19206/18854/20682/20664/50913/18213/11923/21380/18129/26564/13388/20674/11921/21416/12677/20681/14633/15208/18128/20319/14634/14451/17927/22417/15205
GO:1901532	BP	GO:1901532	regulation of hematopoietic progenitor cell differentiation	29	-0.698992	-1.9199	0.000152036	0.00155937	0.00106851	1643	tags=48%, list=19%, signal=39%	268564/78697/68219/15526/15289/12571/22339/18024/17311/17863/15208/18128/15205/234396
GO:0048813	BP	GO:0048813	dendrite morphogenesis	148	0.341076	1.63388	0.000154939	0.00158636	0.001087	1884	tags=37%, list=22%, signal=30%	110834/270190/665113/17760/56013/211134/13193/15572/77480/327814/65254/103967/12569/56320/11444/269397/243961/12386/67287/58234/93691/12361/60597/238276/93686/545156/216831/14810/13844/237868/19699/13508/18163/83814/16560/14360/56637/241638/192167/13385/382253/170731/19055/11487/29819/19242/12323/18223/12286/228662/64451/11352/213084/66713/19211
GO:1903532	BP	GO:1903532	positive regulation of secretion by cell	172	0.316963	1.53657	0.00015648	0.00159933	0.0010959	1673	tags=40%, list=19%, signal=33%	14427/14812/18799/19339/14419/11785/16443/18795/20979/20315/56216/109689/109305/27062/11444/74772/18642/268860/18751/20910/12361/216856/12288/68039/58994/14761/54393/19340/20666/18111/56513/12287/76338/276952/76499/16971/26420/225372/12934/68585/14682/18546/20617/22249/12048/320405/192167/59033/53378/20614/14299/18508/20677/54003/170731/209630/116733/71764/78894/382018/12289/18750/76055/54126/568…
GO:0045055	BP	GO:0045055	regulated exocytosis	123	0.363282	1.73222	0.000157178	0.00160365	0.00109886	1726	tags=46%, list=20%, signal=38%	19339/12721/64051/100503659/327814/20974/207227/20977/20979/116837/56216/20981/27062/26875/20964/22318/18751/20910/12361/12288/12290/12298/76787/19340/242662/229521/72194/12889/17957/12287/18645/12652/20980/104015/20617/22249/110279/64176/12048/320405/192167/59033/20614/14299/218035/382018/26431/18750/20743/67808/111173/213760/56807/60510/67474/12286/74998
GO:0034470	BP	GO:0034470	ncRNA processing	316	-0.428446	-1.51764	0.000165869	0.00168643	0.00115557	3327	tags=68%, list=38%, signal=43%	227656/209584/78581/216156/59050/52686/19942/67949/70044/75422/107328/66711/67390/53414/107071/20227/66229/80913/72198/21771/72344/100038991/77065/27993/213773/68731/72085/216987/229937/66161/227522/70285/67205/68730/74753/27966/433702/66926/19090/67674/101861/103136/18130/212528/67994/52513/68533/105372/19989/53379/18572/100609/78890/215194/68845/67755/214627/104721/75273/66489/30946/72167/10246…
GO:0014015	BP	GO:0014015	positive regulation of gliogenesis	41	-0.649628	-1.91634	0.000169781	0.00171426	0.00117464	1072	tags=34%, list=12%, signal=30%	18208/17242/14580/12257/17869/50913/13654/20539/104156/20681/17863/18128/12767/15205
GO:0099173	BP	GO:0099173	postsynapse organization	169	0.331954	1.61449	0.000169503	0.00171426	0.00117464	1895	tags=40%, list=22%, signal=32%	14812/14432/13004/107065/270190/56013/211134/170758/327814/16443/18187/18189/241514/103967/12569/18190/56320/234214/18191/243961/58234/12361/216856/19165/20411/20404/19122/319504/545156/19280/319387/216831/14810/81907/94190/13844/19699/272381/18163/16560/80749/14360/241638/192167/13385/18693/22084/11820/382253/170731/70729/11487/29819/245684/20743/54126/19242/12323/18223/64451/11352/236915/240057…
GO:0006312	BP	GO:0006312	mitotic recombination	20	-0.750564	-1.92529	0.000170373	0.00171726	0.0011767	1363	tags=70%, list=16%, signal=59%	17686/17685/226026/67241/17350/22594/19360/114714/12144/74335/12190/19361/209334/234396
GO:0010970	BP	GO:0010970	transport along microtubule	133	0.353137	1.67073	0.000171605	0.0017267	0.00118317	1651	tags=34%, list=19%, signal=28%	12794/18039/16572/17760/17762/16594/69697/18762/22141/17756/17755/22142/22223/16574/18040/16593/17754/11735/360213/68724/76686/16561/81907/72368/12217/30957/67774/16560/228355/232946/16553/75665/71923/64933/72421/11820/16569/29819/13427/68196/11777/13424/67269/23859/12121
GO:0051145	BP	GO:0051145	smooth muscle cell differentiation	34	-0.660658	-1.89322	0.000172427	0.00172921	0.00118489	1243	tags=41%, list=14%, signal=35%	243931/12387/17260/15213/22339/54601/13433/66993/20682/107869/54409/18128/22417/15205
GO:0008544	BP	GO:0008544	epidermis development	134	-0.503345	-1.71081	0.000172446	0.00172921	0.00118489	1323	tags=29%, list=15%, signal=25%	18992/18053/14160/12387/13167/226519/20672/67694/14056/56338/58208/15213/83925/286940/21781/18822/70300/19207/29876/19206/20682/20602/270893/73750/11695/16449/494504/13388/11921/19712/12578/14633/16776/18590/15208/18128/14632/15205/12192
GO:0050432	BP	GO:0050432	catecholamine secretion	28	0.609618	2.07552	0.000173597	0.00173181	0.00118667	1195	tags=61%, list=14%, signal=53%	18799/19339/20979/20315/20981/27062/11444/268860/18751/54393/229521/12652/20980/68585/18546/20617/12801
GO:0009123	BP	GO:0009123	nucleoside monophosphate metabolic process	42	-0.652227	-1.93237	0.000173587	0.00173181	0.00118667	1736	tags=57%, list=20%, signal=46%	18103/56749/80914/13178/11564/14450/15452/11637/18950/11486/19139/11534/237823/23918/67054/69719/22247/231327/110074/110639/381101/22171/20425/21877
GO:0032535	BP	GO:0032535	regulation of cellular component size	237	0.301523	1.55124	0.000173049	0.00173181	0.00118667	1316	tags=29%, list=15%, signal=25%	104252/16728/71751/12904/19713/21367/12721/18039/76884/26456/17762/13193/20358/17756/17755/18479/20315/56320/20359/26875/18040/74772/234695/58234/100034363/18846/20355/14567/19241/279561/360213/666244/52822/18709/83704/68732/20360/14168/19280/16885/11519/214968/19240/76499/72368/16971/29869/18645/13508/75788/30948/67774/12934/319740/68585/230101/71653/56637/20740/50876/71923/20742/14784/14026/687…
GO:2000001	BP	GO:2000001	regulation of DNA damage checkpoint	19	-0.759996	-1.93706	0.000181501	0.00180602	0.00123752	438	tags=53%, list=5%, signal=50%	65964/68145/67153/12190/241627/19891/19361/12021/50883/12189
GO:0042733	BP	GO:0042733	embryonic digit morphogenesis	42	-0.650685	-1.9278	0.000185064	0.00183679	0.00125861	1014	tags=55%, list=12%, signal=49%	106633/380718/216560/18109/277939/433759/81896/12166/65964/12387/234740/16973/70300/58198/66910/11695/26564/14633/18128/20319/14634/14451/14609
GO:0090659	BP	GO:0090659	walking behavior	27	0.608769	2.04274	0.000189775	0.00188036	0.00128846	1914	tags=59%, list=22%, signal=46%	21367/17762/57754/22223/12288/12298/18145/22771/13643/19156/67269/12286/20273/11352/320790/15211
GO:0001658	BP	GO:0001658	branching involved in ureteric bud morphogenesis	26	-0.713921	-1.9151	0.000190679	0.00188611	0.0012924	792	tags=50%, list=9%, signal=46%	22339/19206/17869/20682/58198/21853/20681/12505/16776/14634/22417/18654/14734
GO:0061387	BP	GO:0061387	regulation of extent of cell growth	90	0.401101	1.79566	0.00020445	0.0020189	0.00138339	1106	tags=37%, list=13%, signal=32%	16728/71751/12904/26456/17762/13193/20358/17756/17755/18479/20315/56320/20359/18846/20355/14567/360213/52822/20360/14168/19280/16885/214968/76499/16971/29869/13508/75788/12934/319740/68585/71653/56637
GO:0051785	BP	GO:0051785	positive regulation of nuclear division	28	-0.704876	-1.92606	0.00020534	0.00202426	0.00138706	301	tags=32%, list=3%, signal=31%	16002/18226/67177/19362/67141/229841/108907/22417/14609
GO:2001021	BP	GO:2001021	negative regulation of response to DNA damage stimulus	54	-0.609311	-1.8555	0.000207446	0.00203814	0.00139657	1364	tags=35%, list=16%, signal=30%	17319/71890/269400/18294/22594/237211/51869/117599/75736/237877/74041/77782/12505/50883/214763/75317/67141/223970/69885
GO:0030513	BP	GO:0030513	positive regulation of BMP signaling pathway	20	-0.746363	-1.91452	0.000207885	0.00203902	0.00139718	377	tags=30%, list=4%, signal=29%	18129/15208/18128/16007/14734/15205
GO:0048168	BP	GO:0048168	regulation of neuronal synaptic plasticity	40	0.531124	1.94088	0.000210368	0.00205991	0.0014115	1883	tags=55%, list=22%, signal=43%	14812/21367/19339/20977/116837/20964/58234/14806/110891/76787/14810/13844/56637/20617/22249/13385/11820/382018/12323/26562/240057/240028
GO:0006513	BP	GO:0006513	protein monoubiquitination	59	-0.595164	-1.82602	0.000210898	0.00206165	0.00141268	722	tags=22%, list=8%, signal=20%	70238/237211/58186/12190/76073/67196/67030/76843/14087/19361/12021/12189/18140
GO:0055074	BP	GO:0055074	calcium ion homeostasis	138	0.347001	1.67299	0.000213032	0.00207903	0.00142459	2019	tags=40%, list=23%, signal=31%	68312/14812/269615/18799/668940/14226/12721/64051/278279/66168/108058/18795/56506/12176/238871/94249/170770/74772/109676/18751/78506/12288/19165/14806/110891/12298/14810/20191/72828/65945/12652/80795/20617/64176/12801/12313/14299/11820/170731/17357/14385/71982/18750/20541/111173/13198/12286/12315/14062/320790/217893/53322/11941/94178/21808
GO:0098703	BP	GO:0098703	calcium ion import across plasma membrane	14	0.724114	2.01954	0.000215634	0.0020974	0.00143718	1722	tags=79%, list=20%, signal=63%	12288/19122/110891/12290/238276/12287/14360/19055/12289/20541/12286
GO:0043583	BP	GO:0043583	ear development	104	-0.527566	-1.75054	0.000217162	0.00210875	0.00144496	680	tags=21%, list=8%, signal=20%	14051/17869/20682/15444/67628/73750/21380/320398/110789/16449/26564/17216/13388/20674/11921/19712/14633/15208/18128/14634/14451/15205
GO:0001832	BP	GO:0001832	blastocyst growth	19	-0.755936	-1.92671	0.000219378	0.00212321	0.00145486	756	tags=37%, list=9%, signal=34%	27354/69270/233826/12190/19363/76044/12649
GO:0046605	BP	GO:0046605	regulation of centrosome cycle	46	-0.631909	-1.88256	0.000220137	0.00212702	0.00145747	1603	tags=50%, list=18%, signal=41%	103573/319675/26425/17245/212514/236266/72776/107503/244329/214444/18226/18148/219103/225659/70799/74335/70235/233064/20873/100502766/12449/209334/20460
GO:1905475	BP	GO:1905475	regulation of protein localization to membrane	127	0.351573	1.66076	0.00022079	0.0021298	0.00145939	1726	tags=39%, list=20%, signal=31%	665113/18762/108058/98496/18479/18189/71951/170770/12569/56320/53331/234214/58234/14567/11735/216856/279561/13483/20411/19122/18709/238276/76686/26422/12889/545156/12297/216831/76499/16971/13844/19062/18708/18412/14360/56637/12048/13385/20742/237611/116733/11487/77574/53612/13649/19242/12323/71770/74998
GO:2000027	BP	GO:2000027	regulation of animal organ morphogenesis	55	-0.598745	-1.82694	0.0002305	0.00221614	0.00151854	792	tags=29%, list=9%, signal=27%	22339/20377/20682/58198/14362/21380/26564/494504/104156/72080/20681/18590/14186/20319/22417/14734
GO:0098900	BP	GO:0098900	regulation of action potential	29	0.590389	2.03267	0.000233998	0.00224607	0.00153905	1213	tags=52%, list=14%, signal=45%	16480/108058/11444/109676/11735/12288/110891/13052/14168/12293/12297/20191/30948/12801/12313
GO:0051047	BP	GO:0051047	positive regulation of secretion	181	0.308837	1.52558	0.000236434	0.00226572	0.00155252	1673	tags=40%, list=19%, signal=33%	14427/14812/18799/19339/14419/11785/16443/18795/20979/20315/56216/109689/109305/27062/11444/74772/18642/268860/18751/20910/12361/216856/12288/68039/58994/14761/54393/19340/20666/18111/56513/12287/76338/276952/76499/16971/26420/225372/12934/68585/14682/67443/18546/20617/22249/12048/320405/22433/192167/59033/53378/20614/14299/18508/20677/54003/170731/209630/19055/116733/71764/78894/382018/12289/187…
GO:0060113	BP	GO:0060113	inner ear receptor cell differentiation	35	-0.667143	-1.92336	0.000241596	0.0023114	0.00158382	410	tags=54%, list=5%, signal=52%	330409/380718/216560/18109/57265/14182/16918/67042/236266/15213/73750/110789/16449/13388/11921/19712/15208/18128/15205
GO:0009798	BP	GO:0009798	axis specification	47	-0.61894	-1.85963	0.000242663	0.00231781	0.00158821	1023	tags=30%, list=12%, signal=26%	15213/15376/20377/19206/12705/68151/18129/27412/13388/17427/20878/18128/20460/14734
GO:0048880	BP	GO:0048880	sensory system development	205	-0.456861	-1.5969	0.00025133	0.00239276	0.00163957	1293	tags=27%, list=15%, signal=23%	12018/20683/74206/236266/12387/269831/18186/58208/15289/234740/228839/54352/16973/18541/69675/216274/53885/14107/260305/29876/22339/19126/66993/18081/12577/21815/12955/58235/80837/20682/20664/18213/11923/270893/64075/18129/16449/195727/13388/20674/12677/20681/20181/17127/270120/15208/18128/19662/12832/14634/14451/12826/18742/15205/14609
GO:0051590	BP	GO:0051590	positive regulation of neurotransmitter transport	14	0.716824	1.9992	0.000265014	0.00251484	0.00172322	1467	tags=71%, list=17%, signal=59%	20979/56216/20910/12287/20617/12048/192167/59033/269642/382018
GO:0007076	BP	GO:0007076	mitotic chromosome condensation	15	-0.794996	-1.90533	0.000266499	0.00252311	0.00172889	933	tags=60%, list=11%, signal=54%	52683/78658/68298/70099/215387/14211/67849/108907/54392
GO:0010469	BP	GO:0010469	regulation of signaling receptor activity	64	0.452453	1.82009	0.000270311	0.00255264	0.00174912	1672	tags=47%, list=19%, signal=38%	23892/12794/238871/18189/100102/260297/12569/228836/18190/243961/58234/225849/216856/19165/60597/81905/380686/13844/19699/15980/20779/224997/192167/13385/18693/11820/54377/12121/75785/68943
GO:1901342	BP	GO:1901342	regulation of vasculature development	116	-0.506676	-1.70291	0.00027488	0.0025916	0.00177582	1320	tags=39%, list=15%, signal=33%	226841/239528/27279/114715/11350/106014/20416/18053/20349/20683/12387/269831/216527/18186/16002/17242/15289/22340/21872/22339/67784/69219/18024/54601/320910/15277/18081/18854/80837/15368/54409/18760/107831/242705/11504/13388/70097/12827/12189/23871/20319/12767/22417/18654/15245
GO:0070588	BP	GO:0070588	calcium ion transmembrane transport	135	0.342975	1.63308	0.000286187	0.00268951	0.00184291	1414	tags=33%, list=16%, signal=28%	68312/14812/269615/12295/18799/14226/12721/11419/108058/100503659/18795/238871/94249/170770/109305/109676/78506/57440/12288/19165/19122/110891/12290/238276/12298/81905/14697/12293/12287/12297/14810/20191/72828/30948/66109/14360/20617/12313/55991/237611/225055/212670/54377/19055
GO:0008589	BP	GO:0008589	regulation of smoothened signaling pathway	56	-0.596995	-1.82222	0.000288183	0.00270392	0.00185278	988	tags=29%, list=11%, signal=25%	15376/70300/19207/20377/19206/58198/269941/104732/67009/14633/59056/14632/14634/14451/15245/14734
GO:2000649	BP	GO:2000649	regulation of sodium ion transmembrane transporter activity	29	0.582778	2.00646	0.000302693	0.00283095	0.00193983	1659	tags=45%, list=19%, signal=36%	108058/18795/100102/14166/11735/279561/69106/14168/83814/75607/18693/235281/75785
GO:0090235	BP	GO:0090235	regulation of metaphase plate congression	12	-0.827047	-1.90545	0.000305713	0.00285463	0.00195605	231	tags=42%, list=3%, signal=41%	16319/54141/52276/11799/20877
GO:0099111	BP	GO:0099111	microtubule-based transport	141	0.345777	1.66475	0.000310327	0.00289308	0.0019824	1651	tags=33%, list=19%, signal=27%	12794/18039/16572/269209/17760/17762/16594/69697/18762/22141/17756/17755/22142/319953/22223/16574/18040/16593/17754/11735/360213/68724/76686/16561/81907/72368/12217/30957/67774/16560/228355/232946/16553/75665/71923/64933/72421/11820/16569/29819/13427/68196/11777/13424/67269/23859/12121
GO:0017157	BP	GO:0017157	regulation of exocytosis	113	0.361004	1.68654	0.000313659	0.00291483	0.0019973	1722	tags=45%, list=20%, signal=37%	19339/100503659/327814/207227/11981/20977/20979/116837/56216/20981/27062/26875/20964/74772/22318/18751/20910/12361/67295/58994/12290/12298/19340/242662/229521/72194/12889/76338/76499/18645/20980/20617/22249/110279/64176/12048/320405/192167/73205/59033/53378/14299/116733/26431/18750/67808/213760/56807/60510/67474/12286
GO:0007405	BP	GO:0007405	neuroblast proliferation	50	-0.612356	-1.85668	0.000315068	0.00292327	0.00200309	792	tags=38%, list=9%, signal=35%	12387/22059/19716/22339/27354/26934/66993/58198/11923/233064/100182/67203/20674/12677/224171/18128/14634/15245/12316
GO:0051294	BP	GO:0051294	establishment of spindle orientation	33	-0.669699	-1.9089	0.000318592	0.00295128	0.00202227	1092	tags=39%, list=13%, signal=35%	26951/244329/214444/102124/76123/67203/56150/72080/70385/54141/18817/12615/67052
GO:0048645	BP	GO:0048645	animal organ formation	27	-0.705846	-1.92036	0.000323622	0.00299181	0.00205005	1214	tags=41%, list=14%, signal=35%	12387/14707/17260/66993/18712/21380/14633/18128/14186/14634/15205
GO:0061371	BP	GO:0061371	determination of heart left/right asymmetry	29	-0.684209	-1.8793	0.00032406	0.00299181	0.00205005	377	tags=24%, list=4%, signal=23%	17260/18129/13388/17127/18128/20460/14609
GO:0097485	BP	GO:0097485	neuron projection guidance	137	0.330374	1.58977	0.000328237	0.00302143	0.00207035	1446	tags=42%, list=17%, signal=35%	16728/14432/22152/21367/13638/269116/19649/210801/270190/76884/16572/19277/26456/73710/22253/11785/170758/65254/20358/18187/20315/12569/20359/16574/93691/18846/20355/11735/114873/384569/52666/14251/319504/545156/20360/214968/13642/16971/13844/19699/12805/13508/30957/12934/13176/14365/23964/13639/223435/13643/14026/18508/11820/105689/22772/170822/225743
GO:0007033	BP	GO:0007033	vacuole organization	132	0.351333	1.65657	0.000335888	0.00308214	0.00211195	3656	tags=69%, list=42%, signal=41%	14421/12721/68728/74438/227738/60599/74772/240752/103199/29869/245860/170625/230103/57436/75788/66734/67443/11984/209478/14339/73205/56486/11432/170731/116733/77963/105513/234852/64143/68943/108083/51897/54609/67526/217893/15211/69150/100504663/68953/93739/68365/55978/12421/192236/67064/20615/19349/74302/22241/73658/320191/70495/11909/66241/228361/228545/65114/100226/54197/76959/77573/209131/9873…
GO:1990806	BP	GO:1990806	ligand-gated ion channel signaling pathway	18	0.66055	1.9368	0.000337267	0.00308944	0.00211695	1338	tags=61%, list=15%, signal=52%	14812/232975/18795/12569/109305/67579/545156/14810/14682/11820/14800
GO:0007631	BP	GO:0007631	feeding behavior	34	0.546563	1.91457	0.000338272	0.00308944	0.00211695	1715	tags=41%, list=20%, signal=33%	14812/50769/21367/14419/73094/18212/22223/11444/14810/20848/12801/11820/320840/13134
GO:0001947	BP	GO:0001947	heart looping	28	-0.696747	-1.90384	0.000338235	0.00308944	0.00211695	377	tags=25%, list=4%, signal=24%	17260/18129/13388/17127/18128/20460/14609
GO:0009112	BP	GO:0009112	nucleobase metabolic process	21	-0.730185	-1.89666	0.000341019	0.00310967	0.00213081	1627	tags=67%, list=19%, signal=54%	56749/14450/108037/15452/18950/51797/11486/19139/11534/67054/69719/22247/231327/20425
GO:0050433	BP	GO:0050433	regulation of catecholamine secretion	24	0.625836	2.02991	0.000343392	0.00312642	0.00214229	1195	tags=67%, list=14%, signal=58%	18799/19339/20979/20315/20981/11444/268860/18751/54393/229521/12652/20980/68585/18546/20617/12801
GO:0003143	BP	GO:0003143	embryonic heart tube morphogenesis	33	-0.668643	-1.90589	0.000348366	0.00316677	0.00216994	377	tags=27%, list=4%, signal=26%	17260/21677/18129/13388/17127/18128/20460/15205/14609
GO:2000045	BP	GO:2000045	regulation of G1/S transition of mitotic cell cycle	115	-0.509914	-1.7139	0.000349549	0.00317258	0.00217392	937	tags=23%, list=11%, signal=21%	12580/72057/56190/57913/219103/69274/66993/18854/12445/105837/227292/12575/18214/67628/20133/11504/27214/269424/19891/19650/12578/14841/52679/20460/12443/20135/381293
GO:0034764	BP	GO:0034764	positive regulation of transmembrane transport	122	0.357298	1.68187	0.000352365	0.00319318	0.00218803	1773	tags=38%, list=20%, signal=30%	241528/68312/24014/13869/14419/16485/18795/432442/58234/16502/109676/11735/279561/57440/12288/13483/20411/238276/76686/12298/81905/12293/12297/14810/20191/13844/19699/15980/83814/75607/20617/12313/237611/216739/170731/54377/19055/237542/11933/77574/12289/76055/23830/68943/16150/100986
GO:0098659	BP	GO:0098659	inorganic cation import across plasma membrane	39	0.514655	1.86427	0.000355394	0.00321065	0.0022	1722	tags=51%, list=20%, signal=41%	232975/223604/16519/16522/279561/12288/19122/110891/12290/238276/83704/12287/75607/14360/236794/19055/11933/12289/20541/12286
GO:0099587	BP	GO:0099587	inorganic ion import across plasma membrane	39	0.514655	1.86427	0.000355394	0.00321065	0.0022	1722	tags=51%, list=20%, signal=41%	232975/223604/16519/16522/279561/12288/19122/110891/12290/238276/83704/12287/75607/14360/236794/19055/11933/12289/20541/12286
GO:0048284	BP	GO:0048284	organelle fusion	114	0.353886	1.66272	0.000358406	0.00323286	0.00221522	3018	tags=54%, list=35%, signal=35%	19339/12721/12176/20979/116837/56216/53331/20981/74772/22318/20910/26949/229521/12889/12287/20980/14545/20617/20614/353047/170731/56428/218035/116733/53612/105513/234852/111173/209018/60510/269338/67474/108083/14809/68953/215708/11652/56041/67064/67826/20615/19349/100756/56389/100317/228545/66437/55943/56398/56494/100226/76959/75734/18457/20955/12028/67414/245886/67166/74006/108958
GO:0007632	BP	GO:0007632	visual behavior	38	0.50546	1.81936	0.000370594	0.00332226	0.00227648	1839	tags=47%, list=21%, signal=38%	18574/234593/232975/22142/11444/27403/12288/12290/101489/14810/15357/108012/20238/195018/11820/11352/67068/240057
GO:0001709	BP	GO:0001709	cell fate determination	16	-0.765388	-1.87195	0.000379008	0.00338728	0.00232103	1214	tags=56%, list=14%, signal=48%	12387/13592/17260/19207/19206/18129/11921/17927/15205
GO:0007215	BP	GO:0007215	glutamate receptor signaling pathway	26	0.59512	1.99819	0.00038267	0.00341477	0.00233987	1467	tags=58%, list=17%, signal=48%	14812/232975/18795/14816/12569/58234/67579/19122/545156/14810/14360/14682/11820/14800/382018
GO:1902692	BP	GO:1902692	regulation of neuroblast proliferation	26	-0.698963	-1.87498	0.000389473	0.00347017	0.00237783	1214	tags=50%, list=14%, signal=43%	12387/22059/19716/22339/66993/58198/233064/20674/12677/224171/18128/14634/12316
GO:0016126	BP	GO:0016126	sterol biosynthetic process	36	0.539558	1.91172	0.000392012	0.00348747	0.00238969	1705	tags=58%, list=20%, signal=47%	73166/192156/208715/18194/66234/16987/14137/20775/13121/68603/15357/74754/13360/235293/110196/17855/20788/72999/231070/15490/18984
GO:0032271	BP	GO:0032271	regulation of protein polymerization	125	0.347116	1.65098	0.000394059	0.00350035	0.00239851	1316	tags=32%, list=15%, signal=28%	104252/20257/12721/76884/22153/17762/100732/69697/72205/17756/17755/18479/56320/260315/234695/100034363/11789/19241/106763/666244/18709/76686/68732/11519/19240/76499/18645/30948/230101/13191/20740/50876/105439/20617/20742/14784/14026/68767/102774/67771
GO:0015850	BP	GO:0015850	organic hydroxy compound transport	105	0.376503	1.74436	0.000396751	0.00351368	0.00240765	1445	tags=39%, list=17%, signal=33%	14427/69863/18799/19339/14419/75605/20979/100102/20315/20981/27062/11444/268860/18751/27403/27410/58994/54393/11305/229521/235283/16971/76306/12652/20980/18145/68585/68299/18546/52857/20617/12801/22433/243328/217265/68767/170731/227446/269642/20788/116733
GO:0001654	BP	GO:0001654	eye development	202	-0.455331	-1.59248	0.000397366	0.00351368	0.00240765	1293	tags=27%, list=15%, signal=23%	12018/20683/74206/236266/12387/269831/18186/58208/15289/234740/228839/54352/16973/18541/69675/216274/53885/14107/260305/29876/22339/19126/66993/18081/12577/21815/12955/58235/80837/20682/20664/18213/11923/64075/18129/16449/195727/13388/20674/12677/20681/20181/17127/270120/15208/18128/19662/12832/14634/14451/12826/18742/15205/14609
GO:0150063	BP	GO:0150063	visual system development	202	-0.455331	-1.59248	0.000397366	0.00351368	0.00240765	1293	tags=27%, list=15%, signal=23%	12018/20683/74206/236266/12387/269831/18186/58208/15289/234740/228839/54352/16973/18541/69675/216274/53885/14107/260305/29876/22339/19126/66993/18081/12577/21815/12955/58235/80837/20682/20664/18213/11923/64075/18129/16449/195727/13388/20674/12677/20681/20181/17127/270120/15208/18128/19662/12832/14634/14451/12826/18742/15205/14609
GO:0016233	BP	GO:0016233	telomere capping	34	-0.64691	-1.85383	0.000399872	0.00353049	0.00241916	1281	tags=44%, list=15%, signal=38%	108689/269400/55947/21749/22594/28113/17535/19360/27354/11920/70891/59125/18005/20877/18761
GO:0030879	BP	GO:0030879	mammary gland development	61	-0.575931	-1.77053	0.000400561	0.00353123	0.00241967	931	tags=28%, list=11%, signal=25%	16973/22339/19206/14815/16367/18854/20682/12190/104156/12608/12578/14633/12443/14634/22417/404710/14609
GO:0071363	BP	GO:0071363	cellular response to growth factor stimulus	313	-0.417941	-1.48022	0.000402755	0.00354521	0.00242925	1250	tags=22%, list=14%, signal=19%	399558/20660/329506/12387/13653/69260/60406/22059/18186/17975/74360/17260/19716/15114/219134/14176/70300/21915/70568/245688/22340/170676/22339/68010/20377/65112/14314/14815/320910/13433/12705/12577/18854/20682/14733/14362/18213/54409/12193/18760/11600/21380/18129/15117/26564/116701/13388/14456/14783/12827/21416/244058/12505/17127/15208/18128/51944/14186/20319/20419/16007/22417/18654/14560/15245/1…
GO:0010971	BP	GO:0010971	positive regulation of G2/M transition of mitotic cell cycle	25	-0.71486	-1.90329	0.000421206	0.00369688	0.00253318	997	tags=64%, list=11%, signal=57%	108911/12530/15512/12545/16906/114714/66993/20133/12531/19363/76843/12532/67141/12443/268697/12534
GO:0045765	BP	GO:0045765	regulation of angiogenesis	114	-0.497518	-1.66735	0.000421252	0.00369688	0.00253318	1662	tags=39%, list=19%, signal=32%	226841/239528/27279/114715/11350/106014/20416/18053/20349/20683/12387/269831/216527/18186/16002/17242/15289/22340/21872/22339/67784/69219/18024/54601/320910/15277/18081/18854/80837/15368/54409/18760/107831/242705/11504/13388/70097/12827/12189/23871/20319/12767/18654/15245
GO:0010833	BP	GO:0010833	telomere maintenance via telomere lengthening	63	-0.568753	-1.76085	0.00042236	0.00370104	0.00253603	1514	tags=35%, list=17%, signal=29%	56351/11545/52530/108689/269400/12387/216853/21749/28113/68147/19360/234344/11920/245474/68275/18854/59125/19361/18005/208084/20877/18761
GO:0001956	BP	GO:0001956	positive regulation of neurotransmitter secretion	12	0.7422	1.9841	0.000424306	0.00371225	0.00254371	1467	tags=75%, list=17%, signal=62%	20979/56216/20910/12287/20617/12048/192167/59033/382018
GO:0051656	BP	GO:0051656	establishment of organelle localization	303	-0.419595	-1.4856	0.000424911	0.00371225	0.00254371	1031	tags=18%, list=12%, signal=17%	59014/15114/21749/17350/244329/67139/22350/214444/18226/18148/230899/16906/16907/11920/19384/52639/102124/76123/230872/70891/15368/20528/20969/72823/234686/12190/67203/16580/67177/83815/56150/110033/72080/67749/16319/228421/21335/56742/100502766/70385/54141/67849/52276/18817/12615/66977/11799/268697/229841/108907/108000/71878/381293/73804/20877/67052
GO:0035282	BP	GO:0035282	segmentation	52	-0.593727	-1.80104	0.000429545	0.00374712	0.0025676	1166	tags=31%, list=13%, signal=27%	22059/18186/15376/20377/11920/57434/13654/233826/16848/26564/13388/16776/17127/15208/18128/20319
GO:0046599	BP	GO:0046599	regulation of centriole replication	17	-0.753531	-1.87647	0.000431138	0.0037554	0.00257328	1547	tags=76%, list=18%, signal=63%	319675/17245/212514/236266/72776/214444/18226/18148/219103/225659/70799/20873/20460
GO:0051653	BP	GO:0051653	spindle localization	46	-0.619962	-1.84697	0.000442447	0.00384817	0.00263685	957	tags=33%, list=11%, signal=29%	26951/244329/214444/102124/76123/67203/56150/72080/70385/54141/18817/12615/108907/12316/67052
GO:0006906	BP	GO:0006906	vesicle fusion	85	0.383865	1.71297	0.000447498	0.00388631	0.00266298	2681	tags=51%, list=31%, signal=35%	19339/12721/20979/116837/56216/53331/20981/74772/22318/20910/229521/12889/12287/20980/20617/20614/353047/218035/116733/53612/105513/234852/111173/209018/60510/269338/67474/108083/14809/68953/11652/56041/67064/67826/20615/19349/56389/100317/55943/56398/56494/100226/76959
GO:0007186	BP	GO:0007186	G protein-coupled receptor signaling pathway	199	0.300688	1.51235	0.000449874	0.00390113	0.00267314	1542	tags=33%, list=18%, signal=28%	18155/14427/30052/21367/14704/242425/18799/11803/383348/83397/14419/14788/241263/16526/22141/18795/238871/20977/13139/13349/14816/22354/12569/224129/109689/109305/56533/18751/70461/14681/20394/68039/56077/74270/14761/238276/52882/54393/14697/14702/319387/101489/16971/12652/19062/66082/93690/14682/20779/14365/50876/20617/14687/17237/12801/18693/20606/11820/70771/18483/170822/19156/13429/26431/2066…
GO:0043010	BP	GO:0043010	camera-type eye development	176	-0.462952	-1.60021	0.000450899	0.00390423	0.00267526	1042	tags=28%, list=12%, signal=25%	12018/20683/236266/12387/269831/18186/58208/234740/228839/54352/16973/18541/216274/53885/14107/260305/29876/22339/19126/66993/18081/12577/21815/12955/58235/80837/20682/20664/18213/11923/18129/16449/195727/13388/20674/12677/20681/20181/17127/270120/15208/18128/19662/14634/14451/12826/18742/15205/14609
GO:0051953	BP	GO:0051953	negative regulation of amine transport	10	0.785478	1.99535	0.000452063	0.00390509	0.00267585	1458	tags=80%, list=17%, signal=67%	268860/215113/54393/229521/12652/20617/12801/65106
GO:0060623	BP	GO:0060623	regulation of chromosome condensation	11	-0.829437	-1.88216	0.000454039	0.00390821	0.00267799	957	tags=64%, list=11%, signal=57%	244329/68298/70099/215387/14211/268697/54392
GO:0015872	BP	GO:0015872	dopamine transport	24	0.617131	2.00168	0.000461532	0.00396687	0.00271818	1673	tags=79%, list=19%, signal=64%	19339/20979/20315/20981/11444/268860/18751/58994/54393/229521/20980/68585/18546/20617/12801/243328/269642/68943/60510
GO:0007411	BP	GO:0007411	axon guidance	136	0.331555	1.59368	0.000475073	0.00406529	0.00278562	1446	tags=42%, list=17%, signal=35%	16728/14432/22152/21367/13638/269116/19649/210801/270190/76884/16572/19277/26456/73710/22253/11785/170758/65254/20358/18187/20315/12569/20359/16574/93691/18846/20355/11735/114873/384569/52666/14251/319504/545156/20360/214968/13642/16971/13844/19699/12805/13508/30957/12934/13176/14365/23964/13639/223435/13643/14026/18508/11820/105689/22772/170822/225743
GO:0006936	BP	GO:0006936	muscle contraction	107	0.364583	1.68385	0.000483791	0.00413383	0.00283258	1567	tags=37%, list=18%, signal=31%	11847/50769/108015/110834/12295/668940/71960/14226/16480/232975/108058/11785/16485/238871/56320/11444/268860/109676/11674/57440/12288/19165/17131/58994/14168/12293/20191/12652/30948/83814/50876/12313/17904/20606/237611/235281/12289/18750/20541/68196
GO:0070848	BP	GO:0070848	response to growth factor	326	-0.41191	-1.45987	0.000486187	0.00414823	0.00284245	1250	tags=21%, list=14%, signal=19%	399558/20660/329506/12387/13653/69260/60406/22059/18186/17975/74360/17260/19716/15114/219134/14176/70300/21915/70568/245688/22340/170676/22339/68010/20377/65112/14314/14815/320910/13433/12705/12577/18854/20682/14733/14362/18213/54409/12193/18760/11600/21380/18129/15117/26564/116701/13388/20674/14456/14783/12827/21416/244058/12505/17127/15208/18128/51944/14186/20319/20419/16007/22417/18654/14560/1…
GO:0007628	BP	GO:0007628	adult walking behavior	25	0.606059	1.99211	0.000489921	0.00417399	0.0028601	1914	tags=60%, list=22%, signal=47%	21367/17762/57754/22223/12288/12298/18145/22771/13643/67269/12286/20273/11352/320790/15211
GO:0010332	BP	GO:0010332	response to gamma radiation	40	-0.644361	-1.8858	0.000500651	0.00425918	0.00291848	1523	tags=50%, list=18%, signal=41%	65964/12043/12018/13653/22059/18950/68539/14375/22427/11920/12955/57434/18854/17869/12575/12190/74041/11810/50883/211651
GO:0040001	BP	GO:0040001	establishment of mitotic spindle localization	33	-0.659167	-1.87888	0.000515102	0.00436304	0.00298965	1092	tags=39%, list=13%, signal=35%	26951/244329/214444/102124/76123/67203/56150/72080/70385/18817/12615/108907/67052
GO:0048172	BP	GO:0048172	regulation of short-term neuronal synaptic plasticity	14	0.701253	1.95578	0.000519413	0.00439318	0.0030103	1467	tags=57%, list=17%, signal=48%	19339/20977/20964/14806/110891/76787/22249/382018
GO:0006606	BP	GO:0006606	protein import into nucleus	118	-0.49106	-1.65525	0.00052969	0.00447362	0.00306542	1451	tags=28%, list=17%, signal=24%	18141/234865/237082/13557/218210/29867/70769/76582/110750/22059/56338/445007/103468/170762/227699/18226/70572/56488/19384/72565/18969/18854/12575/18760/11600/16647/12189/16543/18128/13605/14634/12534/18761
GO:0050679	BP	GO:0050679	positive regulation of epithelial cell proliferation	96	-0.519535	-1.70396	0.000530514	0.00447411	0.00306575	1052	tags=25%, list=12%, signal=22%	16002/17242/15289/22340/22339/20377/17869/20682/15368/14595/18760/353156/21380/18129/15117/21416/14633/97165/18128/12443/14451/12822/18654/404710
GO:0051129	BP	GO:0051129	negative regulation of cellular component organization	479	-0.3873	-1.39385	0.000536869	0.00451465	0.00309353	919	tags=16%, list=11%, signal=15%	244418/65079/214444/16852/19360/18148/17318/21872/242687/20361/14580/19357/22339/16332/27354/65112/71943/11920/12257/268970/12955/208177/18854/225115/70799/20682/109242/74335/105837/70433/70420/79456/12010/69716/56312/17216/67177/56150/327799/244058/67749/16319/11810/107351/80708/12649/68014/14841/12704/100502766/80986/270120/12449/209334/18128/70385/13685/107995/67141/208628/52276/22137/18817/67…
GO:0030330	BP	GO:0030330	DNA damage response, signal transduction by p53 class mediator	47	-0.604487	-1.81621	0.000561022	0.00469745	0.00321879	1364	tags=38%, list=16%, signal=32%	17319/230784/67071/22059/55982/56190/18148/57913/11920/83383/18854/12575/12190/12578/12505/52679/14235/50883
GO:1904062	BP	GO:1904062	regulation of monoatomic cation transmembrane transport	159	0.328195	1.59451	0.000561912	0.00469817	0.00321928	1910	tags=37%, list=22%, signal=29%	241528/68312/12295/14226/12721/14419/108058/100503659/16485/18795/238871/100102/14166/432442/22318/16502/109676/11735/279561/57440/12288/13483/19165/69106/19122/238276/12298/14697/14168/12293/12297/14810/20191/72828/30948/83814/66109/75607/14360/20617/12313/18693/11820/237611/225055/235281/19055/11933/12289/20541/76055/75785/12286/16150/100986/12315/19211/14062/320790
GO:0090305	BP	GO:0090305	nucleic acid phosphodiester bond hydrolysis	58	-0.578469	-1.77225	0.000566816	0.00472563	0.0032381	2781	tags=66%, list=32%, signal=45%	219094/215194/104721/30946/50912/69920/68276/213550/104662/66481/244871/108062/74035/213895/54188/67724/67842/19819/59028/68219/66362/54364/52530/83703/212442/67276/66446/59014/69639/17535/71151/19360/18148/208366/227715/237877/14156/327762
GO:1901533	BP	GO:1901533	negative regulation of hematopoietic progenitor cell differentiation	10	-0.835025	-1.84279	0.000572888	0.00476264	0.00326346	713	tags=50%, list=8%, signal=46%	18024/17863/15208/18128/15205
GO:0002064	BP	GO:0002064	epithelial cell development	103	-0.518874	-1.7205	0.000572372	0.00476264	0.00326346	1164	tags=28%, list=13%, signal=25%	216527/20672/67694/228790/20733/58208/286940/22350/14107/29876/94192/21872/12571/22339/68328/11677/20682/17698/14595/18129/622434/16449/21873/13388/20681/18128/12767/12822/14609
GO:0006913	BP	GO:0006913	nucleocytoplasmic transport	251	-0.42708	-1.50422	0.000584102	0.00484207	0.00331789	2448	tags=41%, list=28%, signal=30%	192176/353258/20383/22196/227720/66441/72124/226432/20823/67045/68968/73666/74504/17999/53817/13726/97112/72170/230500/57258/56291/231452/71805/230908/192170/107939/20054/28114/16211/319757/17149/56274/75547/21849/24015/69482/216190/223527/67842/103573/66011/70686/233726/18141/234865/15526/237082/13557/218210/29867/22166/329506/69912/70769/76582/110750/226747/22059/59015/56338/445007/103468/17076…
GO:0051169	BP	GO:0051169	nuclear transport	251	-0.42708	-1.50422	0.000584102	0.00484207	0.00331789	2448	tags=41%, list=28%, signal=30%	192176/353258/20383/22196/227720/66441/72124/226432/20823/67045/68968/73666/74504/17999/53817/13726/97112/72170/230500/57258/56291/231452/71805/230908/192170/107939/20054/28114/16211/319757/17149/56274/75547/21849/24015/69482/216190/223527/67842/103573/66011/70686/233726/18141/234865/15526/237082/13557/218210/29867/22166/329506/69912/70769/76582/110750/226747/22059/59015/56338/445007/103468/17076…
GO:0045995	BP	GO:0045995	regulation of embryonic development	59	-0.577254	-1.77107	0.000588122	0.00486848	0.00333598	1681	tags=36%, list=19%, signal=29%	140858/56456/56207/20174/56505/67071/12387/228839/15376/102693/18024/26934/21815/208177/16449/13388/16776/18128/20319/22417/15205
GO:1902904	BP	GO:1902904	negative regulation of supramolecular fiber organization	107	0.361555	1.66986	0.000596154	0.00492798	0.00337676	1301	tags=36%, list=15%, signal=31%	23805/20257/12721/67254/22153/69697/72205/17756/17755/99512/56320/260315/243961/12386/234695/58234/100034363/11789/19241/17754/666244/76686/68732/14168/11519/19240/208158/76499/18645/19062/18708/20740/50876/20617/18693/20742/14026/102774
GO:0007064	BP	GO:0007064	mitotic sister chromatid cohesion	21	-0.719775	-1.86962	0.00059756	0.00493262	0.00337993	479	tags=67%, list=6%, signal=63%	68501/71521/56292/100710/24061/226026/72117/30939/14841/72107/72415/67849/107995/71988
GO:0008156	BP	GO:0008156	negative regulation of DNA replication	20	-0.720882	-1.84915	0.000600029	0.004946	0.0033891	1166	tags=50%, list=13%, signal=43%	22059/21749/60364/16332/226409/66131/21853/67177/57441/67141
GO:0060008	BP	GO:0060008	Sertoli cell differentiation	11	-0.82367	-1.86907	0.000601862	0.00495412	0.00339466	692	tags=45%, list=8%, signal=42%	68328/20682/20681/22417/14609
GO:0030516	BP	GO:0030516	regulation of axon extension	79	0.403674	1.7441	0.000610263	0.00501619	0.00343719	1106	tags=37%, list=13%, signal=32%	16728/71751/26456/17762/20358/17756/17755/18479/20315/56320/20359/18846/20355/14567/360213/52822/20360/19280/16885/214968/76499/16971/13508/75788/12934/319740/68585/71653/56637
GO:2000780	BP	GO:2000780	negative regulation of double-strand break repair	26	-0.690785	-1.85304	0.0006325	0.0051771	0.00354745	722	tags=42%, list=8%, signal=39%	74355/71890/18294/237211/51869/117599/77782/214763/75317/223970/69885
GO:0030510	BP	GO:0030510	regulation of BMP signaling pathway	42	-0.62485	-1.85126	0.000631683	0.0051771	0.00354745	759	tags=31%, list=9%, signal=28%	68010/20377/14314/14362/18129/21416/244058/15208/18128/20319/16007/14734/15205
GO:0000132	BP	GO:0000132	establishment of mitotic spindle orientation	29	-0.67261	-1.84744	0.000638914	0.00522227	0.00357841	1092	tags=41%, list=13%, signal=36%	26951/244329/214444/102124/76123/67203/56150/72080/70385/18817/12615/67052
GO:2000105	BP	GO:2000105	positive regulation of DNA-templated DNA replication	10	-0.832438	-1.83708	0.000652155	0.00532304	0.00364746	366	tags=60%, list=4%, signal=58%	12545/27214/67177/12566/52679/108961
GO:1902305	BP	GO:1902305	regulation of sodium ion transmembrane transport	35	0.538778	1.87797	0.000664866	0.00540412	0.00370302	1659	tags=40%, list=19%, signal=32%	108058/18795/100102/14166/11735/279561/69106/14168/83814/75607/18693/235281/11933/75785
GO:0002052	BP	GO:0002052	positive regulation of neuroblast proliferation	17	-0.745099	-1.85547	0.000668095	0.00542281	0.00371582	1214	tags=59%, list=14%, signal=51%	12387/19716/22339/66993/233064/20674/224171/18128/14634/12316
GO:0090174	BP	GO:0090174	organelle membrane fusion	87	0.379017	1.69455	0.000671292	0.00544119	0.00372842	2200	tags=41%, list=25%, signal=31%	19339/12721/20979/116837/56216/53331/20981/74772/22318/20910/229521/12889/12287/20980/20617/20614/353047/218035/116733/53612/105513/234852/111173/209018/60510/269338/67474/108083/14809/68953/11652/56041/67064/67826/20615/19349
GO:0006412	BP	GO:0006412	translation	479	-0.386173	-1.38979	0.000674525	0.00545982	0.00374118	3304	tags=62%, list=38%, signal=41%	56412/56334/70207/104458/209354/104625/19942/26417/75422/229317/272396/217331/18120/101122/98221/118451/76563/80913/14151/105083/210529/72201/74203/55944/100038991/232791/68036/67671/66077/208643/110954/59054/71984/108853/69577/140570/69956/67840/72284/67228/66223/217980/217869/68436/13664/216877/212679/433702/100037258/28028/19090/66845/19045/231464/64659/66483/75452/67994/225215/13627/225929/19…
GO:0006650	BP	GO:0006650	glycerophospholipid metabolic process	149	0.323125	1.54128	0.00068723	0.00555495	0.00380637	2547	tags=47%, list=29%, signal=34%	269615/18799/232086/230779/18795/13139/236899/18710/193742/668212/27410/240752/56077/18709/103199/16329/68671/170749/19062/14077/74182/66082/18708/56442/14705/66569/104015/76500/67216/18717/219135/71795/50767/320951/70310/210376/26457/24057/27399/14245/16592/52858/108083/19211/64436/100504663/380921/13481/233011/12651/110911/101490/76192/16835/74302/55979/224020/216233/56468/53332/55980/14792/219…
GO:0019985	BP	GO:0019985	translesion synthesis	15	-0.779269	-1.86763	0.000694589	0.00559892	0.0038365	733	tags=73%, list=8%, signal=67%	268564/80905/71890/18972/27015/67967/18971/18538/18974/76843/68026
GO:0008542	BP	GO:0008542	visual learning	36	0.52924	1.87516	0.000698701	0.00562431	0.00385389	1297	tags=42%, list=15%, signal=36%	18574/234593/232975/22142/11444/27403/12288/12290/101489/14810/15357/108012/20238/195018/11820
GO:0060236	BP	GO:0060236	regulation of mitotic spindle organization	31	-0.668307	-1.87519	0.000711316	0.00571797	0.00391807	887	tags=35%, list=10%, signal=32%	73420/18226/219103/76123/77744/21335/56742/20460/18817/209737/72119
GO:0002312	BP	GO:0002312	B cell activation involved in immune response	43	-0.60614	-1.80251	0.000727715	0.00581773	0.00398643	1407	tags=47%, list=16%, signal=39%	66362/17685/15510/71890/11486/17350/70238/55982/16852/27354/210293/17688/51869/237877/16848/18129/16431/13388/22256/26909
GO:0070169	BP	GO:0070169	positive regulation of biomineral tissue development	24	-0.707745	-1.8748	0.000730698	0.00583139	0.00399579	351	tags=42%, list=4%, signal=40%	20535/106522/17260/110789/12608/20181/17127/67141/16007/22417
GO:0050910	BP	GO:0050910	detection of mechanical stimulus involved in sensory perception of sound	10	-0.830728	-1.8333	0.000731422	0.00583139	0.00399579	596	tags=50%, list=7%, signal=47%	17869/73750/110789/20674/19712
GO:0045604	BP	GO:0045604	regulation of epidermal cell differentiation	21	-0.715538	-1.85861	0.00073571	0.00585758	0.00401373	1106	tags=48%, list=13%, signal=42%	14056/15213/19207/19206/13388/11921/15208/18128/15205/12192
GO:0006278	BP	GO:0006278	RNA-templated DNA biosynthetic process	51	-0.586978	-1.78041	0.000741698	0.00588918	0.00403539	1299	tags=33%, list=15%, signal=29%	52530/108689/12387/216853/21749/28113/68147/19360/11920/245474/68275/18854/59125/18005/208084/20877/18761
GO:0007004	BP	GO:0007004	telomere maintenance via telomerase	51	-0.586978	-1.78041	0.000741698	0.00588918	0.00403539	1299	tags=33%, list=15%, signal=29%	52530/108689/12387/216853/21749/28113/68147/19360/11920/245474/68275/18854/59125/18005/208084/20877/18761
GO:0035270	BP	GO:0035270	endocrine system development	57	-0.559739	-1.71319	0.000754821	0.00597712	0.00409565	1034	tags=26%, list=12%, signal=23%	17242/15376/12571/14815/12577/20682/21380/13388/20674/21416/14633/17127/14632/22417/15205
GO:1901861	BP	GO:1901861	regulation of muscle tissue development	23	-0.710442	-1.86629	0.000768169	0.00607094	0.00415993	1214	tags=48%, list=14%, signal=41%	12387/16002/17260/56449/117606/13388/21416/17127/17927/108000/14609
GO:0033077	BP	GO:0033077	T cell differentiation in thymus	45	-0.607659	-1.80741	0.00076875	0.00607094	0.00415993	1214	tags=33%, list=14%, signal=29%	12387/22059/58208/11486/52683/14082/12571/12144/12193/12010/12578/15064/14634/22417/12192
GO:0006695	BP	GO:0006695	cholesterol biosynthetic process	33	0.539724	1.87684	0.000774143	0.00609703	0.00417781	1705	tags=61%, list=20%, signal=49%	73166/192156/208715/18194/66234/16987/14137/13121/68603/15357/74754/13360/235293/110196/17855/20788/72999/231070/15490/18984
GO:1902653	BP	GO:1902653	secondary alcohol biosynthetic process	33	0.539724	1.87684	0.000774143	0.00609703	0.00417781	1705	tags=61%, list=20%, signal=49%	73166/192156/208715/18194/66234/16987/14137/13121/68603/15357/74754/13360/235293/110196/17855/20788/72999/231070/15490/18984
GO:0048839	BP	GO:0048839	inner ear development	90	-0.532533	-1.72499	0.000775277	0.00609773	0.00417829	582	tags=21%, list=7%, signal=20%	20682/15444/67628/73750/21380/320398/110789/16449/26564/17216/13388/20674/11921/19712/14633/15208/18128/14634/15205
GO:0034504	BP	GO:0034504	protein localization to nucleus	217	-0.432916	-1.51471	0.000776552	0.00609954	0.00417953	1522	tags=26%, list=18%, signal=22%	231803/233726/11545/18141/234865/30934/237082/13557/230784/18053/218210/29867/22166/28036/70769/76582/110750/22059/56338/445007/103468/216853/170762/15191/59014/19387/227699/20019/18226/18148/70572/16906/56488/22427/16907/19384/16367/103743/72565/18969/18854/20682/12575/18760/11600/16647/21416/12578/12021/12189/16543/18128/13605/18817/14634/12534/18761
GO:0072665	BP	GO:0072665	protein localization to vacuole	57	0.443321	1.74046	0.000780992	0.00612617	0.00419778	3337	tags=70%, list=38%, signal=44%	74772/194309/81905/66914/75788/68585/68299/72825/12492/98402/54377/218035/116733/68421/20661/66096/209018/74718/320528/56700/11776/100504663/218699/19349/270096/70394/70297/230895/107305/15239/52348/104831/20955/230676/225326/81904/68576/27681/66868/260302
GO:0045321	BP	GO:0045321	leukocyte activation	372	-0.402684	-1.43668	0.000787014	0.00616512	0.00422446	1364	tags=24%, list=16%, signal=21%	17319/17685/14357/20535/15510/71890/17886/12018/20909/17387/15979/12387/13653/15452/22059/18950/14056/59009/14375/16002/51797/58208/17242/11486/17260/15289/17350/70238/52683/72057/11534/55982/16852/14082/230899/12571/23918/27354/20377/12400/22038/210293/17688/11920/320910/51869/18477/66993/103743/12144/17869/12445/11987/102545/15368/12575/14268/17698/23882/12193/237877/16848/12010/18129/16431/173…
GO:0090596	BP	GO:0090596	sensory organ morphogenesis	133	-0.479008	-1.62664	0.000794887	0.00620182	0.00424962	883	tags=27%, list=10%, signal=25%	12018/20683/236266/12387/269831/18208/54352/70300/14107/22339/14051/19126/58235/17869/20682/20664/73750/21380/18129/320398/16449/26564/13388/20674/11921/19712/12677/20681/14633/270120/18128/19662/12832/14634/14451/18742
GO:0001657	BP	GO:0001657	ureteric bud development	42	-0.617209	-1.82862	0.000828717	0.00643137	0.00440691	792	tags=38%, list=9%, signal=35%	22339/20377/19206/17869/20682/58198/21853/20681/12505/16776/17127/14634/22417/18654/14734/15205
GO:0001823	BP	GO:0001823	mesonephros development	42	-0.617209	-1.82862	0.000828717	0.00643137	0.00440691	792	tags=38%, list=9%, signal=35%	22339/20377/19206/17869/20682/58198/21853/20681/12505/16776/17127/14634/22417/18654/14734/15205
GO:0072163	BP	GO:0072163	mesonephric epithelium development	42	-0.617209	-1.82862	0.000828717	0.00643137	0.00440691	792	tags=38%, list=9%, signal=35%	22339/20377/19206/17869/20682/58198/21853/20681/12505/16776/17127/14634/22417/18654/14734/15205
GO:0072164	BP	GO:0072164	mesonephric tubule development	42	-0.617209	-1.82862	0.000828717	0.00643137	0.00440691	792	tags=38%, list=9%, signal=35%	22339/20377/19206/17869/20682/58198/21853/20681/12505/16776/17127/14634/22417/18654/14734/15205
GO:0060560	BP	GO:0060560	developmental growth involved in morphogenesis	176	0.298395	1.47138	0.000836628	0.00648414	0.00444307	1107	tags=28%, list=13%, signal=25%	16728/71751/12904/76884/20450/26456/17762/18762/13193/75605/20358/68404/17756/17755/18479/20979/18187/116837/20315/56320/20359/20981/18846/20355/14567/360213/20404/52822/20360/14168/19280/16885/214968/81907/76499/16971/29869/17984/13508/230103/75788/20980/83814/12934/319740/68585/235542/71653/56637/236794
GO:0030509	BP	GO:0030509	BMP signaling pathway	65	-0.561501	-1.74978	0.000839861	0.00650057	0.00445432	759	tags=23%, list=9%, signal=21%	68010/20377/14314/14362/18129/26564/21416/244058/15208/18128/20319/16007/14560/14734/15205
GO:0035050	BP	GO:0035050	embryonic heart tube development	43	-0.60404	-1.79626	0.000842313	0.00651092	0.00446141	1214	tags=28%, list=14%, signal=24%	12387/20672/17260/18541/21677/18129/13388/17127/18128/20460/15205/14609
GO:0042110	BP	GO:0042110	T cell activation	211	-0.436884	-1.52792	0.000845044	0.00652338	0.00446995	1338	tags=24%, list=15%, signal=21%	14357/20535/15510/17886/12387/13653/22059/18950/59009/16002/51797/58208/17242/11486/15289/52683/72057/11534/16852/14082/12571/12400/66993/103743/12144/17869/12445/11987/17698/23882/12193/16848/12010/17311/12608/12578/14087/12505/17127/214763/109594/17863/15064/14634/12767/211651/22417/18761/15205/12192/14609
GO:0042306	BP	GO:0042306	regulation of protein import into nucleus	47	-0.597441	-1.79504	0.00086694	0.00667475	0.00457368	869	tags=26%, list=10%, signal=23%	18226/70572/19384/72565/18760/11600/12189/16543/13605/14634/12534/18761
GO:0006325	BP	GO:0006325	chromatin organization	415	-0.389561	-1.3965	0.000875545	0.00672326	0.00460692	2139	tags=33%, list=25%, signal=26%	12611/66310/15353/75565/71735/19646/93696/268936/330409/20588/12648/78783/53890/27374/12417/67382/13018/223828/78878/12054/230936/214669/65961/13435/56086/19720/21849/72290/433759/75425/51810/78656/116870/15312/26992/223527/66403/140858/242466/68114/56456/73139/268564/20466/57741/22385/56207/321006/23825/71952/74355/56200/109113/59001/54650/101612/13626/20174/232187/53893/56505/12593/331623/94353…
GO:0016197	BP	GO:0016197	endosomal transport	171	0.301668	1.47324	0.000890548	0.00682949	0.0046797	3094	tags=55%, list=36%, signal=36%	234593/27008/16443/270192/100503185/11981/18196/57440/238276/216831/330401/77975/99696/268451/170625/66914/108012/18197/19346/13191/68299/54411/71817/12048/20614/68767/231717/69596/116733/71517/53612/68192/74374/20661/105513/234852/111173/72477/69091/329260/213760/28006/100502841/228359/269338/217342/74018/230514/67581/54399/66530/11776/69150/56433/68953/94178/68365/67064/101490/19349/73689/68505…
GO:0045598	BP	GO:0045598	regulation of fat cell differentiation	67	-0.555706	-1.74204	0.000897456	0.00687343	0.00470981	792	tags=25%, list=9%, signal=23%	22339/72007/20377/100201/20602/56458/12193/18712/81703/16449/12608/21416/17127/16956/20319/15205/12192
GO:0071772	BP	GO:0071772	response to BMP	66	-0.555904	-1.73386	0.000900623	0.00687963	0.00471406	759	tags=23%, list=9%, signal=21%	68010/20377/14314/14362/18129/26564/21416/244058/15208/18128/20319/16007/14560/14734/15205
GO:0071773	BP	GO:0071773	cellular response to BMP stimulus	66	-0.555904	-1.73386	0.000900623	0.00687963	0.00471406	759	tags=23%, list=9%, signal=21%	68010/20377/14314/14362/18129/26564/21416/244058/15208/18128/20319/16007/14560/14734/15205
GO:0009611	BP	GO:0009611	response to wounding	203	-0.442052	-1.54536	0.000911136	0.00695083	0.00476285	1034	tags=23%, list=12%, signal=20%	17242/19716/15289/15376/75957/65079/20443/22340/14580/22339/18024/54357/11749/208177/433855/15368/18213/12575/18214/14268/20969/14595/12193/72735/67916/18129/19296/13361/14456/19128/12369/244058/14114/69563/107351/12505/18590/17127/20878/14632/12767/16007/22417/18761/12192/14609
GO:0095500	BP	GO:0095500	acetylcholine receptor signaling pathway	16	0.667719	1.90346	0.000913717	0.00696143	0.00477011	577	tags=56%, list=7%, signal=53%	110834/18795/12569/23934/109305/234214/11444/18751/20411
GO:0030111	BP	GO:0030111	regulation of Wnt signaling pathway	183	-0.452982	-1.57449	0.0009235	0.00702679	0.0048149	1385	tags=28%, list=16%, signal=24%	93960/11350/20439/217011/407821/20042/20174/381259/207181/14160/71890/56505/29806/12387/13653/232334/27041/17242/219134/64297/70300/260305/230899/68259/68010/20377/328949/100201/20682/58198/14362/70433/56458/67916/68151/269424/26564/27412/494504/20674/14783/21416/107351/17127/16543/18128/14632/20319/14634/14734/12316/218581
GO:0051299	BP	GO:0051299	centrosome separation	13	-0.794158	-1.85913	0.000930802	0.00707313	0.00484665	1257	tags=69%, list=14%, signal=59%	216846/70012/18226/19385/67203/12649/20878/18005/16551
GO:0060039	BP	GO:0060039	pericardium development	11	-0.810312	-1.83876	0.000940857	0.00714024	0.00489264	211	tags=36%, list=2%, signal=36%	216527/20181/17127/18128
GO:0045682	BP	GO:0045682	regulation of epidermis development	22	-0.706569	-1.84784	0.000959445	0.00727185	0.00498282	1106	tags=45%, list=13%, signal=40%	14056/15213/19207/19206/13388/11921/15208/18128/15205/12192
GO:0033522	BP	GO:0033522	histone H2A ubiquitination	19	-0.731166	-1.86358	0.000962707	0.00728711	0.00499328	438	tags=32%, list=5%, signal=30%	70238/12190/76073/19361/12021/12189
GO:0051293	BP	GO:0051293	establishment of spindle localization	42	-0.612634	-1.81507	0.000990981	0.00747204	0.00512	1092	tags=33%, list=13%, signal=29%	26951/244329/214444/102124/76123/67203/56150/72080/70385/54141/18817/12615/108907/67052
GO:0040020	BP	GO:0040020	regulation of meiotic nuclear division	17	-0.736516	-1.8341	0.000998826	0.00752148	0.00515388	384	tags=35%, list=4%, signal=34%	69716/19362/107995/67141/22417/14609
GO:0003205	BP	GO:0003205	cardiac chamber development	88	-0.523293	-1.68381	0.00100292	0.00754254	0.0051683	1214	tags=28%, list=14%, signal=25%	12387/22059/18186/108154/17260/15213/229700/70300/67784/66993/26920/58198/14362/11504/21380/18129/16449/116701/20181/18128/19662/20319/12767/16007/15205
GO:0090398	BP	GO:0090398	cellular senescence	57	-0.554329	-1.69664	0.00100826	0.00757299	0.00518917	2112	tags=58%, list=24%, signal=44%	66409/71701/59027/26395/22608/26406/23955/68501/12166/56371/11350/228913/17319/226026/69260/22059/67241/20937/57295/18226/18148/12571/22427/75736/18854/15361/12575/12190/12010/19650/12578/214763/67141
GO:0097553	BP	GO:0097553	calcium ion transmembrane import into cytosol	74	0.396516	1.68468	0.0010267	0.00770156	0.00527726	2019	tags=49%, list=23%, signal=38%	68312/14812/269615/18799/14226/12721/108058/18795/238871/170770/109676/12288/19122/110891/12290/238276/12293/12287/12297/14810/20191/72828/14360/20617/12313/19055/12289/20541/76055/13198/12286/12315/14062/320790/94178/21808
GO:0045738	BP	GO:0045738	negative regulation of DNA repair	27	-0.683001	-1.85821	0.00108406	0.00809022	0.00554358	722	tags=41%, list=8%, signal=37%	74355/71890/18294/237211/51869/117599/77782/214763/75317/223970/69885
GO:0032206	BP	GO:0032206	positive regulation of telomere maintenance	59	-0.564008	-1.73043	0.00108279	0.00809022	0.00554358	1653	tags=36%, list=19%, signal=29%	56456/11991/56207/20174/56505/269400/12387/21749/30877/28113/17535/19360/234344/27354/11920/245474/18854/59125/18005/20877/18761
GO:0008543	BP	GO:0008543	fibroblast growth factor receptor signaling pathway	33	-0.641755	-1.82925	0.00109513	0.00816246	0.00559309	1389	tags=45%, list=16%, signal=38%	29875/18053/399558/12387/74360/219134/14176/70300/14733/116701/21416/14186/20419/22417/15245
GO:1903421	BP	GO:1903421	regulation of synaptic vesicle recycling	29	0.553659	1.90621	0.00110135	0.00819833	0.00561766	1629	tags=52%, list=19%, signal=42%	20616/103967/56216/26875/22318/229521/94190/104015/12048/192167/18717/11465/13429/72961/56807
GO:0042274	BP	GO:0042274	ribosomal small subunit biogenesis	68	-0.533498	-1.67267	0.00110992	0.00824284	0.00564817	3207	tags=79%, list=37%, signal=51%	53414/21771/67671/213773/216987/433864/19090/67994/215194/30946/102462/68979/76846/20044/67222/110816/78394/98956/20115/353258/104662/14109/66481/67045/57294/20088/54127/68966/20103/75416/57315/217431/20054/20116/20826/22596/20104/20068/69499/213895/75617/65961/67842/67941/59028/217995/20055/20085/16785/72515/78651/59014/18148/208366
GO:0007283	BP	GO:0007283	spermatogenesis	204	-0.440949	-1.54127	0.00111016	0.00824284	0.00564817	1469	tags=24%, list=17%, signal=20%	12041/67042/54650/11517/14782/20535/15512/28036/12593/236266/83964/69260/22059/74360/56449/17350/72787/53885/114714/53381/56693/65971/26934/54725/381678/20682/70891/15361/67374/58186/70235/12190/74041/12427/69716/17864/104156/20681/17427/224171/12704/97165/18128/14632/19662/237911/12316/14609
GO:0050680	BP	GO:0050680	negative regulation of epithelial cell proliferation	81	-0.529176	-1.69282	0.00111196	0.00824574	0.00565015	1149	tags=28%, list=13%, signal=25%	67694/52615/17260/28113/18148/12571/68259/20377/19206/328949/12577/20682/14595/12190/12010/56312/20674/12578/18128/20319/14451/14734/14609
GO:0035518	BP	GO:0035518	histone H2A monoubiquitination	13	-0.790516	-1.85061	0.00112676	0.00833429	0.00571083	952	tags=46%, list=11%, signal=41%	70238/12190/76073/19361/12021/12189
GO:0001569	BP	GO:0001569	branching involved in blood vessel morphogenesis	21	-0.706674	-1.83559	0.00112557	0.00833429	0.00571083	1589	tags=67%, list=18%, signal=55%	11350/18021/20349/12387/18186/17242/229700/22339/67784/11600/21380/20319/12767/12826
GO:0046112	BP	GO:0046112	nucleobase biosynthetic process	15	-0.771155	-1.84819	0.00113211	0.0083633	0.0057307	1627	tags=80%, list=19%, signal=65%	56749/14450/108037/15452/51797/11486/19139/67054/69719/22247/231327/20425
GO:0098840	BP	GO:0098840	protein transport along microtubule	11	0.748639	1.94259	0.00114037	0.00838187	0.00574343	1015	tags=64%, list=12%, signal=56%	16572/69697/16574/17754/76686/30957/16560
GO:0099118	BP	GO:0099118	microtubule-based protein transport	11	0.748639	1.94259	0.00114037	0.00838187	0.00574343	1015	tags=64%, list=12%, signal=56%	16572/69697/16574/17754/76686/30957/16560
GO:0097401	BP	GO:0097401	synaptic vesicle lumen acidification	15	0.668997	1.91118	0.00114037	0.00838187	0.00574343	2326	tags=87%, list=27%, signal=64%	11975/11973/54411/11972/108664/11966/76252/72961/66144/73834/70495/11964/66335
GO:0006874	BP	GO:0006874	intracellular calcium ion homeostasis	130	0.339206	1.60091	0.00113788	0.00838187	0.00574343	2019	tags=40%, list=23%, signal=31%	68312/14812/269615/18799/668940/14226/12721/64051/66168/108058/18795/12176/238871/94249/170770/74772/109676/18751/78506/12288/19165/14806/110891/12298/14810/20191/72828/65945/12652/80795/20617/64176/12801/12313/14299/11820/170731/17357/14385/18750/20541/111173/13198/12286/12315/14062/320790/217893/53322/11941/94178/21808
GO:0030098	BP	GO:0030098	lymphocyte differentiation	181	-0.445735	-1.5463	0.00114565	0.00841009	0.00576277	1653	tags=30%, list=19%, signal=25%	56456/268564/63953/11350/18021/19934/321006/12043/17685/14357/20535/12018/17387/12387/13653/22059/18950/14056/59009/14375/58208/17242/11486/15289/52683/72057/16852/14082/12571/20377/12400/210293/11920/66993/103743/12144/102545/23882/12193/16848/12010/18129/16431/13388/14456/12578/15201/14087/12505/17863/15064/14634/211651/22417/12192
GO:0016125	BP	GO:0016125	sterol metabolic process	72	0.400727	1.70007	0.00114904	0.00842438	0.00577256	1705	tags=47%, list=20%, signal=38%	69863/73166/192156/208715/100102/18194/20597/66234/67800/16987/14137/11305/20775/13121/68603/16971/68177/15357/11370/74754/18145/230101/16890/13360/235293/110196/217265/11820/17855/20788/72999/231070/15490/18984
GO:0002440	BP	GO:0002440	production of molecular mediator of immune response	86	-0.515976	-1.65608	0.00115167	0.00843306	0.00577851	1474	tags=36%, list=17%, signal=30%	56200/66362/56722/17319/17685/15510/71890/20909/14056/17350/70238/55982/64297/20361/27354/17688/11920/51869/15368/237877/11600/12010/16431/77782/14456/225471/22256/214763/15064/19662/26909
GO:0051170	BP	GO:0051170	import into nucleus	121	-0.483181	-1.63119	0.0011591	0.00847682	0.00580849	1451	tags=27%, list=17%, signal=23%	18141/234865/237082/13557/218210/29867/70769/76582/110750/22059/56338/445007/103468/170762/227699/18226/70572/56488/19384/72565/18969/18854/12575/18760/11600/16647/12189/16543/18128/13605/14634/12534/18761
GO:0006937	BP	GO:0006937	regulation of muscle contraction	63	0.417519	1.67776	0.00116228	0.00848942	0.00581713	997	tags=32%, list=11%, signal=28%	11847/108015/110834/12295/668940/14226/16480/16485/238871/56320/268860/109676/57440/12288/17131/14168/12293/20191/12652/30948
GO:0007100	BP	GO:0007100	mitotic centrosome separation	12	-0.800389	-1.84403	0.0011931	0.00869279	0.00595648	869	tags=67%, list=10%, signal=60%	70012/18226/19385/67203/12649/20878/18005/16551
GO:0006403	BP	GO:0006403	RNA localization	137	-0.463903	-1.57685	0.00121073	0.00881023	0.00603695	2431	tags=50%, list=28%, signal=36%	20383/227720/66441/72124/20823/73666/15384/53817/21454/320267/70640/71701/110809/71805/192170/107939/28114/14265/22608/448850/208691/16211/17149/245000/229279/51810/69482/223527/103573/67681/66011/140488/16549/234865/237082/14113/225027/218210/69912/226747/59015/445007/103468/216853/170762/73192/21681/21749/75786/227699/72787/76438/223921/18226/18148/55989/74013/56488/170676/11920/19384/245474/54…
GO:0043043	BP	GO:0043043	peptide biosynthetic process	489	-0.380043	-1.36831	0.0012266	0.00891461	0.00610847	3310	tags=62%, list=38%, signal=40%	20510/56412/56334/70207/104458/209354/104625/19942/26417/75422/229317/272396/217331/18120/101122/98221/118451/76563/80913/14151/105083/210529/72201/74203/55944/100038991/232791/68036/67671/66077/208643/110954/59054/71984/108853/69577/140570/69956/67840/72284/67228/66223/217980/217869/68436/13664/216877/212679/433702/100037258/28028/19090/66845/19045/231464/64659/66483/75452/67994/225215/13627/225…
GO:0042886	BP	GO:0042886	amide transport	193	0.296911	1.42766	0.00123777	0.00898458	0.00615642	1679	tags=36%, list=19%, signal=30%	14812/14226/19339/18012/17932/319924/19275/16443/18795/18212/207227/18479/14816/224129/109689/16522/109305/26875/18642/75770/268860/18751/93691/14681/20910/12361/68267/216856/12288/58994/19276/12290/14761/18575/140919/54393/11305/18111/12889/545156/276952/16971/12876/15357/12652/12934/14682/228355/20617/14687/27416/12801/18693/20614/18508/20677/19055/71764/65106/78894/19156/26457/72961/12289/7605…
GO:0071384	BP	GO:0071384	cellular response to corticosteroid stimulus	24	-0.690322	-1.82865	0.0012428	0.00900993	0.00617379	704	tags=38%, list=8%, signal=35%	14815/74551/83383/12193/19712/110784/13685/17927/12192
GO:0031128	BP	GO:0031128	developmental induction	13	-0.788258	-1.84532	0.00125273	0.00903699	0.00619233	582	tags=54%, list=7%, signal=50%	12387/20682/58198/20674/20681/14186/22417
GO:0070252	BP	GO:0070252	actin-mediated cell contraction	39	0.482217	1.74677	0.00125238	0.00903699	0.00619233	1542	tags=41%, list=18%, signal=34%	668940/16480/108058/238871/56320/109676/12288/14168/12293/20191/30948/83814/71653/17904/235281/12289
GO:1904666	BP	GO:1904666	regulation of ubiquitin protein ligase activity	20	-0.702145	-1.80109	0.0012565	0.00904766	0.00619964	371	tags=50%, list=4%, signal=48%	71890/213539/77891/67121/56150/327799/12578/107995/67141/18817
GO:0030178	BP	GO:0030178	negative regulation of Wnt signaling pathway	94	-0.505058	-1.64662	0.00126683	0.00907147	0.00621596	1385	tags=34%, list=16%, signal=29%	20174/207181/71890/29806/12387/13653/232334/27041/17242/219134/70300/260305/230899/68259/20377/328949/100201/20682/14362/70433/56458/269424/26564/494504/20674/14783/21416/18128/14632/20319/14634/14734
GO:0031111	BP	GO:0031111	negative regulation of microtubule polymerization or depolymerization	38	0.474862	1.70922	0.00127602	0.00912602	0.00625333	833	tags=42%, list=10%, signal=38%	23805/20257/67254/22153/69697/72205/17756/17755/99512/260315/11789/17754/76686/14168/208158/76499
GO:0071900	BP	GO:0071900	regulation of protein serine/threonine kinase activity	182	-0.441649	-1.53278	0.00130241	0.00930336	0.00637486	937	tags=18%, list=11%, signal=17%	12580/214444/18226/230899/22339/16332/20377/83383/12144/12445/70891/18213/12575/21987/18712/12427/26564/12447/17311/70097/12578/18590/56742/12449/12448/20460/20319/12443/18817/12442/23834/12428/268697
GO:0002053	BP	GO:0002053	positive regulation of mesenchymal cell proliferation	18	-0.716767	-1.79933	0.00130503	0.00931071	0.00637989	2000	tags=72%, list=23%, signal=56%	18109/319757/14182/12166/114142/12387/15289/16367/17869/20682/21380/18590/14451
GO:1903115	BP	GO:1903115	regulation of actin filament-based movement	17	0.654353	1.89434	0.00132121	0.00941342	0.00645027	997	tags=53%, list=11%, signal=47%	668940/16480/238871/56320/109676/12288/14168/20191/30948
GO:0030278	BP	GO:0030278	regulation of ossification	49	-0.57675	-1.74316	0.00132265	0.00941342	0.00645027	1090	tags=33%, list=13%, signal=29%	106522/17242/17260/20937/20377/20682/269941/13654/18214/110789/20181/17127/18128/16007/22417/14609
GO:0006688	BP	GO:0006688	glycosphingolipid biosynthetic process	14	0.678446	1.89217	0.00133653	0.00950057	0.00650998	1592	tags=57%, list=18%, signal=47%	14421/20450/26878/20448/26877/20451/20447/14348
GO:0045737	BP	GO:0045737	positive regulation of cyclin-dependent protein serine/threonine kinase activity	19	-0.725955	-1.8503	0.00134549	0.00955263	0.00654566	595	tags=37%, list=7%, signal=34%	12445/70891/18712/56742/20460/12443/23834
GO:0048477	BP	GO:0048477	oogenesis	51	-0.574741	-1.74329	0.00137864	0.0097406	0.00667446	1034	tags=33%, list=12%, signal=30%	14160/12387/17242/17350/53975/11920/54004/26920/70891/12190/12531/69716/20878/67141/268697/22417/12316
GO:0032272	BP	GO:0032272	negative regulation of protein polymerization	49	0.452562	1.73087	0.00137821	0.0097406	0.00667446	1611	tags=43%, list=19%, signal=35%	20257/22153/72205/17756/234695/100034363/19241/666244/76686/68732/11519/19240/18645/20740/50876/20617/20742/14026/102774/11518/54126
GO:0001756	BP	GO:0001756	somitogenesis	37	-0.625767	-1.82374	0.00138913	0.00980283	0.0067171	1624	tags=41%, list=19%, signal=33%	12166/217011/226352/22059/15376/20377/11920/57434/233826/16848/26564/13388/17127/18128/20319
GO:0045766	BP	GO:0045766	positive regulation of angiogenesis	59	-0.558851	-1.71461	0.00140299	0.00987678	0.00676777	1130	tags=37%, list=13%, signal=33%	18186/16002/17242/15289/22340/21872/22339/69219/18024/320910/15277/18081/15368/54409/18760/13388/70097/12189/23871/20319/12767/18654
GO:1904018	BP	GO:1904018	positive regulation of vasculature development	59	-0.558851	-1.71461	0.00140299	0.00987678	0.00676777	1130	tags=37%, list=13%, signal=33%	18186/16002/17242/15289/22340/21872/22339/69219/18024/320910/15277/18081/15368/54409/18760/13388/70097/12189/23871/20319/12767/18654
GO:0002520	BP	GO:0002520	immune system development	104	-0.497729	-1.65154	0.00141665	0.00996092	0.00682543	1643	tags=38%, list=19%, signal=32%	268564/17120/17686/11350/18021/321006/16911/12043/216892/66362/17685/15510/71890/12387/22059/228790/14056/14375/58208/11486/15289/17350/70238/16973/229700/55982/14082/27354/17688/11920/51869/237877/21380/77782/22256/17127/17863/26909/12442/15205
GO:0016574	BP	GO:0016574	histone ubiquitination	30	-0.652215	-1.81139	0.00143537	0.0100804	0.0069073	1066	tags=27%, list=12%, signal=23%	52615/70238/12190/76073/19361/12021/12189/18140
GO:0036297	BP	GO:0036297	interstrand cross-link repair	26	-0.674825	-1.81023	0.00144745	0.0101445	0.00695121	1762	tags=62%, list=20%, signal=49%	60534/140917/76251/104806/14088/55947/98415/71567/237211/74335/66634/67030/14087/19361/19362/211651
GO:0007063	BP	GO:0007063	regulation of sister chromatid cohesion	17	-0.72342	-1.80149	0.00144914	0.0101445	0.00695121	1286	tags=47%, list=15%, signal=40%	226026/12387/19357/14156/79456/67849/68549/12235
GO:0035176	BP	GO:0035176	social behavior	31	0.526295	1.81467	0.00146225	0.0101835	0.00697793	1468	tags=55%, list=17%, signal=46%	353342/18189/18190/18191/11444/243961/58234/56710/216856/60597/545156/14810/20238/13385/22084/102774/18032
GO:0051703	BP	GO:0051703	biological process involved in intraspecies interaction between organisms	31	0.526295	1.81467	0.00146225	0.0101835	0.00697793	1468	tags=55%, list=17%, signal=46%	353342/18189/18190/18191/11444/243961/58234/56710/216856/60597/545156/14810/20238/13385/22084/102774/18032
GO:0060972	BP	GO:0060972	left/right pattern formation	60	-0.553952	-1.70382	0.00146401	0.0101835	0.00697793	2062	tags=40%, list=24%, signal=31%	106633/380718/319757/110350/13543/277939/81896/244631/226352/246102/67694/17260/216274/109065/21815/66910/21380/18129/13388/17427/17127/18128/20460/14609
GO:0003206	BP	GO:0003206	cardiac chamber morphogenesis	61	-0.551036	-1.694	0.00146401	0.0101835	0.00697793	1214	tags=31%, list=14%, signal=27%	12387/22059/18186/17260/15213/229700/66993/14362/11504/21380/18129/16449/116701/20181/18128/19662/20319/16007/15205
GO:0060997	BP	GO:0060997	dendritic spine morphogenesis	58	0.432488	1.70346	0.00147102	0.010208	0.0069947	3098	tags=69%, list=36%, signal=45%	270190/56013/327814/103967/12569/56320/243961/58234/12361/545156/216831/13844/19699/18163/16560/241638/192167/13385/170731/11487/29819/12323/64451/66713/19211/12631/17356/18472/74117/12568/13169/22215/329165/67414/12540/74006/108100/15185/17118/13542
GO:0030335	BP	GO:0030335	positive regulation of cell migration	250	-0.418762	-1.47463	0.00149329	0.010341	0.00708587	872	tags=20%, list=10%, signal=18%	14082/70568/22340/21872/20361/22051/22339/56876/11920/18024/54601/54357/16367/232227/14678/17869/80837/20682/11853/67374/15368/18213/18214/14268/18760/11600/67916/11504/233064/15117/26564/109270/17311/330662/14456/70097/14114/18590/230098/17127/240641/18128/23871/14632/67141/12767/16007/12822/18654
GO:0090066	BP	GO:0090066	regulation of anatomical structure size	278	0.262315	1.3647	0.00149374	0.010341	0.00708587	1316	tags=27%, list=15%, signal=23%	104252/16728/71751/12904/19713/21367/12721/18039/76884/26456/17762/13193/20358/17756/17755/18479/20315/56320/20359/26875/18040/74772/234695/58234/100034363/18846/20355/14567/19241/279561/12288/360213/666244/58994/52822/18709/83704/240672/68732/20360/14168/19280/16885/11519/214968/19240/76499/72368/16971/29869/15357/18645/13508/12652/75788/30948/67774/12934/319740/68585/230101/71653/56637/20740/50…
GO:0050905	BP	GO:0050905	neuromuscular process	87	0.363252	1.62407	0.00151005	0.0104415	0.00715473	1469	tags=38%, list=17%, signal=32%	14812/50769/319984/71960/18039/231503/170758/16485/22142/18189/224129/56320/22223/243961/12386/58234/110532/17754/216856/93686/268859/14810/230103/108012/13191/110279/13385/11820/237611/105689/208117/23821/19156
GO:0051642	BP	GO:0051642	centrosome localization	28	-0.664219	-1.81496	0.00151675	0.0104755	0.00717801	897	tags=36%, list=10%, signal=32%	22350/18080/76123/72823/234686/67203/56150/20878/12316/218977
GO:0033674	BP	GO:0033674	positive regulation of kinase activity	212	-0.431175	-1.50905	0.00152607	0.0105274	0.00721357	921	tags=18%, list=11%, signal=16%	17535/66616/64297/19360/18148/22359/22339/27354/71943/16367/12445/70891/18213/12575/18214/21987/18712/11600/13842/12531/26564/77744/17311/14456/70097/18590/56742/20460/14186/13605/12443/23834/16007/268697/229841/269582/72119/381293
GO:0060914	BP	GO:0060914	heart formation	17	-0.721486	-1.79667	0.00152891	0.0105345	0.00721846	1214	tags=47%, list=14%, signal=41%	12387/14707/17260/66993/18712/21380/18128/15205
GO:0006144	BP	GO:0006144	purine nucleobase metabolic process	13	-0.783939	-1.83521	0.00153322	0.0105517	0.00723025	1349	tags=77%, list=16%, signal=65%	14450/108037/15452/18950/11486/19139/11534/67054/231327/20425
GO:1900087	BP	GO:1900087	positive regulation of G1/S transition of mitotic cell cycle	31	-0.64622	-1.81321	0.00155185	0.0106674	0.00730949	823	tags=42%, list=9%, signal=38%	28036/72776/219103/12445/105837/18214/67628/20133/11504/27214/20460/12443/20135
GO:1904353	BP	GO:1904353	regulation of telomere capping	21	-0.698476	-1.81429	0.00155451	0.0106731	0.00731344	1247	tags=43%, list=14%, signal=37%	269400/22594/19360/27354/11920/59125/18005/20877/18761
GO:0022403	BP	GO:0022403	cell cycle phase	13	-0.782798	-1.83254	0.00156135	0.0107074	0.00733696	1016	tags=62%, list=12%, signal=54%	21749/17350/12571/110052/14841/50883/107995/22137
GO:1903131	BP	GO:1903131	mononuclear cell differentiation	200	-0.434323	-1.51817	0.00156399	0.0107129	0.00734072	1363	tags=26%, list=16%, signal=23%	17685/14357/20535/12018/17387/12387/13653/22059/18950/14056/59009/14375/58208/17242/11486/17260/15289/52683/72057/16852/14082/12571/22339/20377/12400/210293/11920/320910/66993/69656/103743/12144/17869/102545/23882/12193/16848/12010/18129/16431/13388/14456/12608/12578/15201/14087/12505/17863/15064/14634/211651/22417/12192
GO:0033002	BP	GO:0033002	muscle cell proliferation	122	-0.479891	-1.6205	0.00159328	0.0109008	0.00746944	666	tags=19%, list=8%, signal=18%	13433/11677/14678/17869/15368/12575/18214/27401/18712/11600/11504/21416/20181/18392/17863/54598/15208/18128/14632/19662/268697/12534/14609
GO:0046822	BP	GO:0046822	regulation of nucleocytoplasmic transport	90	-0.516327	-1.6725	0.00160004	0.0109214	0.0074836	1312	tags=27%, list=15%, signal=23%	218210/29867/22166/329506/70769/19387/18226/70572/215280/19384/72565/67628/18760/11600/27412/14456/12578/12021/12189/16543/13605/14634/12534/18761
GO:0032253	BP	GO:0032253	dense core granule localization	11	0.736205	1.91033	0.00161866	0.0110099	0.00754419	1015	tags=55%, list=12%, signal=48%	16572/327814/17756/360213/16561/16560
GO:1901950	BP	GO:1901950	dense core granule transport	11	0.736205	1.91033	0.00161866	0.0110099	0.00754419	1015	tags=55%, list=12%, signal=48%	16572/327814/17756/360213/16561/16560
GO:0097091	BP	GO:0097091	synaptic vesicle clustering	17	0.647739	1.87519	0.00161703	0.0110099	0.00754419	1206	tags=59%, list=14%, signal=51%	19339/20616/27204/18189/26875/20964/216856/12217/12048/192167
GO:0009156	BP	GO:0009156	ribonucleoside monophosphate biosynthetic process	24	-0.678994	-1.79864	0.00164434	0.0111716	0.00765498	1627	tags=67%, list=19%, signal=54%	56749/80914/11564/14450/15452/18950/11486/19139/11534/237823/23918/67054/69719/22247/231327/110639
GO:0009394	BP	GO:0009394	2'-deoxyribonucleotide metabolic process	29	-0.65619	-1.80234	0.00168308	0.0114082	0.00781715	1165	tags=41%, list=13%, signal=36%	11637/18950/11486/11534/21915/66422/110074/20133/381101/22171/20425/20135
GO:0019692	BP	GO:0019692	deoxyribose phosphate metabolic process	29	-0.65619	-1.80234	0.00168308	0.0114082	0.00781715	1165	tags=41%, list=13%, signal=36%	11637/18950/11486/11534/21915/66422/110074/20133/381101/22171/20425/20135
GO:0007218	BP	GO:0007218	neuropeptide signaling pathway	16	0.650961	1.85569	0.0016941	0.0114575	0.00785088	571	tags=38%, list=7%, signal=35%	18155/14427/30052/14419/20394/68039
GO:0007368	BP	GO:0007368	determination of left/right symmetry	57	-0.544494	-1.66653	0.00169427	0.0114575	0.00785088	1149	tags=23%, list=13%, signal=20%	67694/17260/216274/109065/21815/66910/21380/18129/13388/17127/18128/20460/14609
GO:0042060	BP	GO:0042060	wound healing	126	-0.475181	-1.60436	0.00172626	0.0116602	0.00798984	874	tags=24%, list=10%, signal=22%	15289/15376/20443/22340/22339/18024/54357/11749/208177/15368/12575/18214/14268/20969/14595/67916/18129/14456/19128/12369/14114/107351/12505/18590/17127/12767/16007/22417/18761/14609
GO:1905145	BP	GO:1905145	cellular response to acetylcholine	17	0.644781	1.86663	0.0017357	0.0117105	0.00802427	577	tags=53%, list=7%, signal=50%	110834/18795/12569/23934/109305/234214/11444/18751/20411
GO:0098901	BP	GO:0098901	regulation of cardiac muscle cell action potential	15	0.658439	1.88101	0.00175587	0.0118329	0.00810812	1870	tags=73%, list=22%, signal=58%	16480/108058/109676/12288/13052/14168/20191/30948/12313/100986/12315
GO:0002347	BP	GO:0002347	response to tumor cell	14	-0.760476	-1.802	0.00177556	0.0119517	0.00818958	1335	tags=57%, list=15%, signal=48%	207181/15510/56338/15289/18129/18128/15064/77777
GO:0045747	BP	GO:0045747	positive regulation of Notch signaling pathway	24	-0.676724	-1.79263	0.00179496	0.0120684	0.00826955	391	tags=33%, list=4%, signal=32%	212547/16848/16449/13388/20674/15208/18128/15205
GO:0045859	BP	GO:0045859	regulation of protein kinase activity	317	-0.402128	-1.42454	0.00181108	0.0121628	0.00833418	937	tags=16%, list=11%, signal=15%	12580/66616/64297/214444/18226/18148/230899/22359/22339/16332/20377/71943/83383/12577/12144/12445/70891/18213/12575/18214/21987/23882/18712/11600/12427/12531/26564/77744/12447/17311/14456/70097/12578/18590/56742/12449/12448/20460/20319/13605/12443/18817/12442/23834/16007/12428/268697/229841/269582/72119/381293
GO:0071887	BP	GO:0071887	leukocyte apoptotic process	59	-0.553526	-1.69827	0.00182277	0.0122273	0.00837837	1489	tags=39%, list=17%, signal=33%	12043/19766/17319/12018/102595/22059/18950/58208/11486/17260/14082/12144/30954/17869/17311/14456/12369/12578/12505/50883/14634/20877/18761
GO:0046488	BP	GO:0046488	phosphatidylinositol metabolic process	89	0.35485	1.58505	0.00184286	0.0123336	0.00845126	2359	tags=45%, list=27%, signal=33%	269615/18799/232086/18795/18710/668212/240752/56077/18709/103199/16329/170749/19062/18708/104015/76500/18717/219135/71795/210376/26457/24057/27399/52858/108083/19211/64436/100504663/13481/233011/101490/74302/224020/216233/56468/53332/55980/219024/226856/67292
GO:0002328	BP	GO:0002328	pro-B cell differentiation	10	-0.81229	-1.79261	0.00184849	0.0123343	0.00845173	144	tags=40%, list=2%, signal=39%	68219/15208/18128/15205
GO:0002377	BP	GO:0002377	immunoglobulin production	55	-0.552617	-1.68619	0.0018493	0.0123343	0.00845173	1407	tags=38%, list=16%, signal=32%	66362/17685/15510/71890/20909/14056/17350/70238/55982/27354/17688/11920/51869/237877/12010/16431/77782/22256/214763/19662/26909
GO:0030323	BP	GO:0030323	respiratory tube development	112	-0.475701	-1.5914	0.00184872	0.0123343	0.00845173	1324	tags=25%, list=15%, signal=21%	237500/20683/243931/17387/12387/228790/106522/11486/15289/15376/22339/72007/76123/20682/20602/21853/20674/14633/16776/18590/18128/14632/14186/19662/14634/15245/14734/15205
GO:0043281	BP	GO:0043281	regulation of cysteine-type endopeptidase activity involved in apoptotic process	109	-0.475991	-1.58767	0.00185278	0.0123434	0.00845796	1712	tags=32%, list=20%, signal=26%	13205/64209/67941/12633/223870/20439/217011/15510/18053/12018/74682/59009/26885/51800/15289/54208/57913/22339/83383/75736/12955/72565/18854/171580/17869/67628/20674/14456/19712/12578/12505/17127/20319/16007/11799
GO:2000042	BP	GO:2000042	negative regulation of double-strand break repair via homologous recombination	16	-0.730757	-1.78725	0.00185621	0.0123522	0.00846397	722	tags=56%, list=8%, signal=52%	74355/71890/237211/51869/117599/77782/214763/75317/223970
GO:0001833	BP	GO:0001833	inner cell mass cell proliferation	12	-0.788677	-1.81705	0.0018651	0.0123972	0.00849481	705	tags=50%, list=8%, signal=46%	109145/69270/233826/12190/76044/12649
GO:0050772	BP	GO:0050772	positive regulation of axonogenesis	77	0.377907	1.62362	0.00187922	0.0124768	0.00854935	1106	tags=30%, list=13%, signal=26%	16728/71751/12904/18039/20616/17760/17762/13193/17755/18212/18479/20315/56320/18846/14567/52822/16885/16971/13508/75788/319740/71653/56637
GO:0060541	BP	GO:0060541	respiratory system development	120	-0.468687	-1.57935	0.00189627	0.0125757	0.00861713	1324	tags=25%, list=15%, signal=21%	237500/20683/243931/17387/12387/228790/106522/11486/15289/15376/70300/22339/72007/76123/20682/20602/21853/116701/20674/14633/16776/18590/18128/14632/14186/19662/14634/15245/14734/15205
GO:0008038	BP	GO:0008038	neuron recognition	31	0.520124	1.79339	0.00190386	0.0126117	0.00864182	1297	tags=48%, list=15%, signal=41%	16728/14432/21367/19649/12569/114873/319504/94185/13844/17984/13508/68585/12801/13643/11820
GO:0071168	BP	GO:0071168	protein localization to chromatin	27	-0.670801	-1.82502	0.00192981	0.0127692	0.00874969	1385	tags=41%, list=16%, signal=34%	20174/17685/14056/71567/19357/22367/66634/67849/18817/12615/71988
GO:0060251	BP	GO:0060251	regulation of glial cell proliferation	31	-0.640485	-1.79712	0.00199173	0.013149	0.00901	1166	tags=35%, list=13%, signal=31%	22059/18208/14580/269951/12257/17869/20539/104156/17863/18128/15205
GO:1905477	BP	GO:1905477	positive regulation of protein localization to membrane	67	0.40504	1.64493	0.00200522	0.0132232	0.00906078	1726	tags=39%, list=20%, signal=31%	18479/18189/170770/12569/11735/216856/279561/13483/20411/19122/238276/76686/12297/76499/16971/13844/18412/14360/13385/20742/237611/77574/13649/19242/71770/74998
GO:0032506	BP	GO:0032506	cytokinetic process	28	-0.658212	-1.79855	0.00204322	0.013398	0.0091806	913	tags=43%, list=11%, signal=38%	17886/216846/66616/18226/13852/26934/240641/13605/68743/74107/20877/19348
GO:0048261	BP	GO:0048261	negative regulation of receptor-mediated endocytosis	18	0.607033	1.77988	0.00204239	0.013398	0.0091806	2212	tags=72%, list=25%, signal=54%	107065/100102/11305/229521/22248/13385/53378/16976/68420/268445/54609/75659/56715
GO:0006904	BP	GO:0006904	vesicle docking involved in exocytosis	33	0.510276	1.77444	0.00203951	0.013398	0.0091806	1657	tags=48%, list=19%, signal=39%	19339/116837/56216/22318/14681/20910/67295/76787/19340/75914/22249/102058/382018/67808/64143/17967
GO:0008285	BP	GO:0008285	negative regulation of cell population proliferation	321	-0.404181	-1.43157	0.00203676	0.013398	0.0091806	1214	tags=23%, list=14%, signal=20%	12387/69260/232334/22059/67694/107503/20733/52615/58208/17260/269033/28113/12580/21781/12398/56190/70300/18226/18148/12571/53975/66262/218820/53381/16332/269951/12228/68259/20377/19206/328949/11920/69219/12257/54601/83383/12577/21815/18854/17869/20682/15361/105837/107869/15368/12575/30939/14595/12190/12010/56312/116701/13388/20674/19712/12608/12578/14114/12677/20181/12505/52679/17127/18128/19662/…
GO:1904031	BP	GO:1904031	positive regulation of cyclin-dependent protein kinase activity	21	-0.692203	-1.798	0.00206004	0.0134931	0.00924577	595	tags=33%, list=7%, signal=31%	12445/70891/18712/56742/20460/12443/23834
GO:0006221	BP	GO:0006221	pyrimidine nucleotide biosynthetic process	18	-0.706769	-1.77423	0.00206937	0.0135239	0.00926685	1736	tags=61%, list=20%, signal=49%	18103/56749/80914/56520/51797/21915/69719/22247/110074/22171/20425
GO:0072528	BP	GO:0072528	pyrimidine-containing compound biosynthetic process	18	-0.706769	-1.77423	0.00206937	0.0135239	0.00926685	1736	tags=61%, list=20%, signal=49%	18103/56749/80914/56520/51797/21915/69719/22247/110074/22171/20425
GO:0099601	BP	GO:0099601	regulation of neurotransmitter receptor activity	38	0.456096	1.64167	0.00207999	0.0135629	0.0092936	1773	tags=61%, list=20%, signal=48%	12794/18189/260297/228836/18190/243961/58234/216856/60597/81905/13844/19699/15980/20779/224997/192167/13385/18693/11820/54377/75785/68943/100986
GO:0008203	BP	GO:0008203	cholesterol metabolic process	68	0.399769	1.62384	0.00209457	0.0136427	0.00934828	1705	tags=49%, list=20%, signal=39%	69863/73166/192156/208715/100102/18194/20597/66234/67800/16987/14137/11305/20775/13121/68603/16971/15357/11370/74754/18145/230101/16890/13360/235293/110196/217265/11820/17855/20788/72999/231070/15490/18984
GO:0055082	BP	GO:0055082	intracellular chemical homeostasis	329	0.245739	1.29179	0.00210812	0.0137157	0.0093983	1547	tags=26%, list=18%, signal=22%	68312/14812/269615/18799/668940/14226/12721/64051/18012/17932/66168/232975/108058/19275/18795/12176/238871/94249/170770/224129/109689/74772/75770/109676/18751/93691/78506/12288/67800/19165/11975/14806/19122/110891/19276/12290/12709/14761/18709/18575/12298/11305/235380/15275/14810/65113/16971/20191/15357/72828/65945/20536/12652/18708/68585/52898/100126824/80795/236794/54411/11984/20617/22249/64176…
GO:0010634	BP	GO:0010634	positive regulation of epithelial cell migration	70	-0.524509	-1.64216	0.00211115	0.0137201	0.00940132	1130	tags=27%, list=13%, signal=24%	18186/16002/15289/22339/18024/54357/16367/232227/80837/20682/15368/18760/11600/67916/15117/330662/70097/23871/12822
GO:0035904	BP	GO:0035904	aorta development	34	-0.609421	-1.74639	0.00211786	0.0137484	0.0094207	1044	tags=32%, list=12%, signal=29%	108154/15213/70300/67784/26920/13654/21380/16449/18128/12767/15205
GO:0043536	BP	GO:0043536	positive regulation of blood vessel endothelial cell migration	29	-0.649748	-1.78464	0.0021319	0.0138088	0.0094621	1274	tags=48%, list=15%, signal=41%	14182/11350/20683/18186/16002/15289/22339/18024/80837/15368/18760/11600/23871/12822
GO:0061842	BP	GO:0061842	microtubule organizing center localization	29	-0.649727	-1.78459	0.0021319	0.0138088	0.0094621	897	tags=34%, list=10%, signal=31%	22350/18080/76123/72823/234686/67203/56150/20878/12316/218977
GO:0042113	BP	GO:0042113	B cell activation	118	-0.466187	-1.57141	0.00213974	0.0138443	0.00948637	1407	tags=34%, list=16%, signal=29%	268564/11350/321006/12043/66362/17319/17685/15510/71890/12018/17387/22059/18950/14056/51797/11486/17260/17350/70238/55982/16852/27354/20377/210293/17688/11920/51869/102545/12575/12193/237877/16848/18129/16431/13388/12578/22256/17863/26909/12192
GO:0045664	BP	GO:0045664	regulation of neuron differentiation	131	-0.465778	-1.57816	0.00215414	0.013922	0.00953965	1042	tags=28%, list=12%, signal=25%	58208/17260/19716/15213/228839/15376/69064/212547/64297/214444/19205/27354/20377/242748/21815/20682/58198/50913/227292/12010/233064/16449/104156/13388/20674/11921/19712/20681/14633/12704/15208/18128/20319/13605/14634/12316/15205
GO:0009263	BP	GO:0009263	deoxyribonucleotide biosynthetic process	14	-0.754866	-1.7887	0.00216701	0.0139588	0.00956487	920	tags=50%, list=11%, signal=45%	11534/21915/110074/20133/22171/20425/20135
GO:0009265	BP	GO:0009265	2'-deoxyribonucleotide biosynthetic process	14	-0.754866	-1.7887	0.00216701	0.0139588	0.00956487	920	tags=50%, list=11%, signal=45%	11534/21915/110074/20133/22171/20425/20135
GO:0046385	BP	GO:0046385	deoxyribose phosphate biosynthetic process	14	-0.754866	-1.7887	0.00216701	0.0139588	0.00956487	920	tags=50%, list=11%, signal=45%	11534/21915/110074/20133/22171/20425/20135
GO:0043549	BP	GO:0043549	regulation of kinase activity	370	-0.389963	-1.38951	0.00218184	0.0140389	0.00961971	1027	tags=17%, list=12%, signal=16%	17260/108900/15376/244329/12580/17535/66616/64297/214444/18226/19360/18148/230899/22359/22339/16332/27354/20377/71943/16367/83383/12577/12144/12445/70891/226849/18213/12575/18214/21987/23882/18712/11600/13842/12427/12531/26564/77744/12447/17311/19650/14456/70097/12578/18590/56742/12449/12448/20460/14186/20319/13605/12443/18817/12442/23834/16007/12428/268697/229841/269582/72119/381293
GO:0030324	BP	GO:0030324	lung development	110	-0.478342	-1.60046	0.00220594	0.0141782	0.00971523	1324	tags=25%, list=15%, signal=22%	237500/20683/243931/17387/12387/228790/106522/11486/15289/15376/22339/72007/76123/20682/20602/21853/20674/14633/16776/18590/18128/14632/14186/19662/14634/15245/14734/15205
GO:1902807	BP	GO:1902807	negative regulation of cell cycle G1/S phase transition	50	-0.567531	-1.72077	0.00221885	0.0142455	0.00976133	1166	tags=32%, list=13%, signal=28%	22059/14056/56190/57913/69274/18854/227292/12575/269424/19891/19650/20674/14841/52679/12443/14451
GO:0009070	BP	GO:0009070	serine family amino acid biosynthetic process	11	-0.788169	-1.78851	0.00223224	0.0143157	0.00980944	1313	tags=82%, list=15%, signal=70%	109079/108037/107272/100678/108156/107869/13361/236539/20425
GO:0001890	BP	GO:0001890	placenta development	81	-0.515013	-1.64752	0.0022349	0.0143171	0.00981037	1080	tags=25%, list=12%, signal=22%	20733/11546/16002/11486/15213/229700/170676/12705/12577/18129/13875/20873/12608/20181/52679/12449/16007/15205/108961/12192
GO:0015695	BP	GO:0015695	organic cation transport	19	0.611072	1.80994	0.00225152	0.0144077	0.00987247	2116	tags=53%, list=24%, signal=40%	110834/18799/18987/214663/76306/20617/243328/12286/11461/100434
GO:0032204	BP	GO:0032204	regulation of telomere maintenance	81	-0.513702	-1.64332	0.00227747	0.0145578	0.00997533	1653	tags=32%, list=19%, signal=26%	56456/11991/56207/11545/20174/56505/108689/269400/12387/21749/22594/30877/28113/17535/19360/234344/27354/11920/245474/18854/17869/59125/18005/208084/20877/18761
GO:0002088	BP	GO:0002088	lens development in camera-type eye	43	-0.582953	-1.73355	0.0022918	0.0146334	0.0100271	1704	tags=40%, list=20%, signal=32%	71521/17132/56371/114715/100710/12387/14107/12577/12955/58235/20664/18213/195727/20674/17127/18742/14609
GO:2000147	BP	GO:2000147	positive regulation of cell motility	257	-0.411312	-1.44895	0.00236195	0.0150156	0.010289	872	tags=24%, list=10%, signal=22%	20349/20683/20909/17387/83964/13653/22059/18186/18208/16002/17242/15289/14082/70568/22340/21872/20361/22051/22339/56876/11920/18024/54601/54357/16367/232227/14678/17869/80837/20682/11853/67374/15368/18213/18214/14268/18760/11600/67916/11504/233064/15117/26564/109270/17311/330662/14456/70097/14114/18590/230098/17127/240641/18128/23871/14632/67141/12767/16007/12822/18654
GO:0043065	BP	GO:0043065	positive regulation of apoptotic process	318	-0.38843	-1.37571	0.0023731	0.0150701	0.0103263	1417	tags=23%, list=16%, signal=20%	19766/16438/18996/13557/15510/18053/194655/12018/20747/16828/12387/13653/19367/18432/74682/22059/56338/72462/67603/51800/17260/15289/108900/83925/16852/14082/57913/20438/53975/66262/20377/22038/11920/12257/14815/83383/72565/18854/17869/11910/15368/18213/56458/21987/23882/20598/14595/56349/15958/18129/98267/56312/19712/21416/12369/12578/106869/20181/12505/12021/50883/17863/18128/20319/17865/13605/…
GO:0051051	BP	GO:0051051	negative regulation of transport	248	0.266119	1.38021	0.00239443	0.0151725	0.0103965	1712	tags=34%, list=20%, signal=28%	68312/12794/14226/12721/107065/17470/11419/17762/19152/56013/108058/100503659/98496/17755/207227/11981/100102/56216/23969/16522/227738/268860/18751/93691/14681/27403/14567/11735/279561/68039/69106/18611/215113/238276/18575/54393/11305/229521/14697/18767/545156/13121/12297/22248/65113/15357/13844/16423/12652/19062/216440/30948/83814/75607/14682/228355/18247/20617/14687/110279/12801/13385/12313/732…
GO:0098657	BP	GO:0098657	import into cell	95	0.346766	1.56524	0.00239975	0.0151897	0.0104083	1722	tags=44%, list=20%, signal=36%	11847/232975/20974/223604/14816/16519/16522/227738/21366/279561/12288/19122/14251/110891/58994/12290/215113/238276/140919/83704/12287/26569/76306/14077/66914/75607/14360/236794/20617/243328/216739/19055/269642/65106/26457/11933/241296/12289/20541/14758/229791/12286
GO:0007413	BP	GO:0007413	axonal fasciculation	18	0.601939	1.76495	0.00240547	0.015193	0.0104106	2364	tags=67%, list=27%, signal=49%	16728/21367/12569/94185/13844/17984/68585/12801/17967/269878/107934/12367
GO:0106030	BP	GO:0106030	neuron projection fasciculation	18	0.601939	1.76495	0.00240547	0.015193	0.0104106	2364	tags=67%, list=27%, signal=49%	16728/21367/12569/94185/13844/17984/68585/12801/17967/269878/107934/12367
GO:0045836	BP	GO:0045836	positive regulation of meiotic nuclear division	10	-0.804479	-1.77538	0.00245979	0.0155025	0.0106226	188	tags=40%, list=2%, signal=39%	19362/67141/22417/14609
GO:1900271	BP	GO:1900271	regulation of long-term synaptic potentiation	28	0.546522	1.8607	0.00248945	0.0156388	0.010716	1895	tags=57%, list=22%, signal=45%	19339/208922/18479/18196/58234/19122/238276/13844/19699/18412/56637/11820/382056/19242/432530/19141
GO:0061180	BP	GO:0061180	mammary gland epithelium development	39	-0.595914	-1.7382	0.00249918	0.015683	0.0107463	1072	tags=33%, list=12%, signal=29%	18208/16973/19206/14815/18854/12190/104156/12608/12578/14633/12443/22417/404710
GO:0048713	BP	GO:0048713	regulation of oligodendrocyte differentiation	25	-0.675418	-1.79828	0.00250813	0.0157054	0.0107617	638	tags=40%, list=7%, signal=37%	12387/17242/103743/20664/50913/21416/15208/18128/12767/15205
GO:0016055	BP	GO:0016055	Wnt signaling pathway	247	-0.414985	-1.46168	0.00250799	0.0157054	0.0107617	1385	tags=22%, list=16%, signal=19%	20174/381259/207181/14160/71890/56505/29806/12387/13653/232334/27041/17242/219134/16973/64297/70300/260305/230899/20438/68259/68010/20377/328949/100201/17869/20682/58198/14362/70433/20969/56458/67916/68151/269424/26564/27412/12447/494504/20674/14783/21416/107351/12505/17127/16543/18128/14632/20319/12443/14634/22417/14734/12316/218581
GO:0051236	BP	GO:0051236	establishment of RNA localization	116	-0.466884	-1.56917	0.00251326	0.0157206	0.0107721	2431	tags=49%, list=28%, signal=36%	20383/227720/66441/72124/20823/73666/53817/71701/110809/71805/192170/107939/28114/14265/22608/208691/16211/17149/245000/229279/69482/223527/103573/67681/66011/140488/16549/234865/237082/225027/218210/69912/226747/59015/445007/103468/170762/73192/21681/21749/227699/72787/76438/223921/18226/18148/74013/56488/170676/11920/19384/54563/20492/69736/140486/22117/12192
GO:0033598	BP	GO:0033598	mammary gland epithelial cell proliferation	20	-0.685553	-1.75853	0.0025254	0.015749	0.0107915	438	tags=25%, list=5%, signal=24%	12190/12608/12578/12443/404710
GO:0042475	BP	GO:0042475	odontogenesis of dentin-containing tooth	34	-0.605343	-1.73471	0.00252515	0.015749	0.0107915	1624	tags=44%, list=19%, signal=36%	12166/94220/20535/18053/18029/12387/58208/58235/21380/494504/13388/21416/14633/16776/14634
GO:1904888	BP	GO:1904888	cranial skeletal system development	35	-0.6135	-1.76871	0.00255664	0.0159068	0.0108997	1233	tags=31%, list=14%, signal=27%	17387/12387/17260/54352/70300/66910/21380/17127/14634/14451/74107
GO:0086001	BP	GO:0086001	cardiac muscle cell action potential	29	0.530758	1.82736	0.00256217	0.0159242	0.0109116	1870	tags=55%, list=22%, signal=43%	16480/108058/109676/11735/12288/13052/14168/12293/20191/30948/83814/12313/235281/12289/100986/12315
GO:1905314	BP	GO:1905314	semi-lunar valve development	12	-0.781511	-1.80054	0.00256626	0.0159326	0.0109174	1023	tags=50%, list=12%, signal=44%	15213/20682/18129/16449/18128/13717
GO:0031338	BP	GO:0031338	regulation of vesicle fusion	22	0.596184	1.86012	0.00262185	0.0162432	0.0111302	1802	tags=59%, list=21%, signal=47%	19339/12721/20979/116837/20981/20910/12889/12287/20980/20617/111173/60510/14809
GO:0008089	BP	GO:0008089	anterograde axonal transport	42	0.46482	1.71107	0.00262876	0.0162688	0.0111477	1617	tags=45%, list=19%, signal=37%	12794/18039/16572/17756/16574/17754/11735/360213/68724/16561/30957/67774/16560/228355/232946/64933/11777/67269/23859
GO:0010165	BP	GO:0010165	response to X-ray	15	-0.748859	-1.79475	0.00263835	0.0163108	0.0111765	1870	tags=80%, list=22%, signal=63%	22596/85305/17685/22059/14375/98415/20377/11920/12144/57434/12190/20319
GO:0042551	BP	GO:0042551	neuron maturation	31	0.51023	1.75927	0.00264321	0.0163235	0.0111852	1617	tags=55%, list=19%, signal=45%	71751/19713/21367/269116/83766/170758/18189/11735/68955/319504/238276/224650/14682/56637/11820/57764/23859
GO:0030100	BP	GO:0030100	regulation of endocytosis	147	0.304238	1.46125	0.00270454	0.0166494	0.0114085	1923	tags=43%, list=22%, signal=34%	23892/107065/20616/13193/16443/72685/100102/23969/109689/227738/20597/27403/11735/20404/14251/238276/76686/11305/229521/17957/22248/94190/13642/16971/12476/66914/30948/83814/104015/20779/19341/20617/12048/192167/18717/13385/18693/53378/16976/19342/22084/11820/11465/68420/218038/19055/13429/72961/11518/19246/18750/268445/56807/67979/12121/71770/22041/54609/213326/56044/11461/71435/75659
GO:0043068	BP	GO:0043068	positive regulation of programmed cell death	322	-0.389051	-1.37761	0.00270944	0.0166621	0.0114172	1417	tags=23%, list=16%, signal=20%	19766/16438/18996/13557/15510/18053/194655/12018/20747/16828/12387/13653/19367/18432/74682/22059/56338/72462/67603/51800/17260/15289/108900/83925/16852/14082/57913/20438/53975/66262/20377/22038/11920/12257/14815/83383/72565/18854/17869/11910/15368/18213/12575/56458/21987/23882/20598/14595/56349/15958/18129/98267/56312/19712/21416/12369/12578/106869/20181/12505/12021/50883/17863/18128/20319/17865/…
GO:0043113	BP	GO:0043113	receptor clustering	42	0.46293	1.70411	0.00271566	0.0166827	0.0114313	1864	tags=50%, list=21%, signal=39%	14812/18479/18189/18190/234214/58234/216856/20411/14806/238276/19699/192167/13385/18693/23859/19242/12286/14809/236915/240057/231637
GO:0006900	BP	GO:0006900	vesicle budding from membrane	55	0.413584	1.59789	0.00272347	0.0167131	0.0114522	3086	tags=60%, list=35%, signal=39%	20616/103967/108012/64933/66251/60409/116733/13429/214459/105513/11777/231070/20334/27096/11776/76510/78232/56491/11773/66397/59005/11775/360013/67231/77371/66226/67511/76959/227648/233489/19324/67898/218811
GO:0051444	BP	GO:0051444	negative regulation of ubiquitin-protein transferase activity	20	-0.683119	-1.75229	0.0027292	0.0167267	0.0114615	278	tags=45%, list=3%, signal=44%	71890/12237/213539/56150/327799/12578/107995/67141/12236
GO:0045921	BP	GO:0045921	positive regulation of exocytosis	47	0.439592	1.66749	0.00273142	0.0167267	0.0114615	2200	tags=55%, list=25%, signal=42%	19339/20979/27062/74772/20910/58994/19340/76338/76499/20617/22249/12048/320405/192167/59033/53378/14299/116733/18750/56807/60510/76707/69150/68953/78808/19349
GO:0046824	BP	GO:0046824	positive regulation of nucleocytoplasmic transport	49	-0.562329	-1.69957	0.00274925	0.0168007	0.0115122	839	tags=24%, list=10%, signal=22%	70572/215280/19384/72565/67628/18760/14456/12189/13605/14634/12534/18761
GO:1901018	BP	GO:1901018	positive regulation of potassium ion transmembrane transporter activity	14	0.654934	1.82659	0.0027667	0.0168453	0.0115427	489	tags=43%, list=6%, signal=41%	241528/14419/16485/432442/16502/109676
GO:0048546	BP	GO:0048546	digestive tract morphogenesis	22	-0.67358	-1.76156	0.00276119	0.0168453	0.0115427	820	tags=50%, list=9%, signal=45%	12043/226352/12387/13852/20377/21416/14633/17127/18128/20319/14634
GO:0090287	BP	GO:0090287	regulation of cellular response to growth factor stimulus	148	-0.448271	-1.53427	0.00276295	0.0168453	0.0115427	1236	tags=24%, list=14%, signal=21%	20660/329506/12387/69260/60406/22059/18186/219134/70300/245688/22340/170676/22339/68010/20377/65112/14314/12577/14733/14362/11600/18129/116701/13388/14783/21416/244058/17127/15208/18128/20319/16007/22417/15245/14734/15205
GO:0006954	BP	GO:0006954	inflammatory response	214	-0.424773	-1.48483	0.0027681	0.0168453	0.0115427	1034	tags=24%, list=12%, signal=22%	20085/19766/353187/17319/208449/15510/15979/83964/11669/14056/17242/11486/15289/244329/64297/16852/66190/230899/20361/22038/11920/18024/14815/18081/72565/269378/209012/15368/14268/20969/239114/14595/18760/18129/56312/100182/12608/12369/225471/14087/12505/17127/97165/54598/18128/23871/16956/211651/52033/18761/14609
GO:0031113	BP	GO:0031113	regulation of microtubule polymerization	41	0.475939	1.74512	0.00277125	0.0168469	0.0115438	1155	tags=41%, list=13%, signal=36%	20257/22153/17762/100732/69697/72205/17756/17755/18479/260315/11789/76686/76499/230101/13191/105439/20617
GO:0006941	BP	GO:0006941	striated muscle contraction	66	0.394254	1.60055	0.0027759	0.0168576	0.0115512	998	tags=32%, list=11%, signal=28%	11847/50769/668940/71960/14226/16480/232975/108058/238871/109676/11674/57440/12288/19165/17131/14168/12293/20191/12652/30948/83814
GO:0042307	BP	GO:0042307	positive regulation of protein import into nucleus	31	-0.632387	-1.7744	0.00282432	0.017116	0.0117282	839	tags=29%, list=10%, signal=26%	70572/19384/72565/18760/12189/13605/14634/12534/18761
GO:0014014	BP	GO:0014014	negative regulation of gliogenesis	31	-0.632376	-1.77437	0.00282432	0.017116	0.0117282	1214	tags=39%, list=14%, signal=33%	12387/22059/107503/269951/12257/103743/18213/11921/15208/18128/18742/15205
GO:0046033	BP	GO:0046033	AMP metabolic process	16	-0.717288	-1.75431	0.00285936	0.0173036	0.0118568	1424	tags=69%, list=16%, signal=58%	11564/14450/15452/11637/18950/11486/11534/237823/67054/231327/110639
GO:0010595	BP	GO:0010595	positive regulation of endothelial cell migration	47	-0.569807	-1.71201	0.0028612	0.0173036	0.0118568	1906	tags=40%, list=22%, signal=32%	26406/19878/14824/14182/11350/20683/18186/16002/15289/22339/18024/80837/15368/18760/11600/67916/70097/23871/12822
GO:0097421	BP	GO:0097421	liver regeneration	10	-0.800598	-1.76681	0.00286732	0.0173048	0.0118576	1405	tags=80%, list=16%, signal=67%	16438/11692/14056/15368/12608/20878/14632/12443
GO:0042471	BP	GO:0042471	ear morphogenesis	53	-0.551006	-1.67153	0.00290252	0.0174991	0.0119907	680	tags=25%, list=8%, signal=23%	14051/17869/20682/73750/21380/320398/26564/13388/20674/11921/19712/14633/14451
GO:0048701	BP	GO:0048701	embryonic cranial skeleton morphogenesis	22	-0.673308	-1.76085	0.00291318	0.0175452	0.0120224	1233	tags=36%, list=14%, signal=31%	17387/17260/54352/70300/21380/17127/14634/14451
GO:0008630	BP	GO:0008630	intrinsic apoptotic signaling pathway in response to DNA damage	72	-0.514527	-1.61067	0.00292153	0.0175592	0.012032	1364	tags=36%, list=16%, signal=31%	17319/17685/12018/19367/22059/18950/68539/51800/17350/17193/22038/17688/11920/75736/72565/18854/17869/15368/12575/237877/12190/74041/56312/12505/50883/12189
GO:0040017	BP	GO:0040017	positive regulation of locomotion	266	-0.407832	-1.44051	0.00291987	0.0175592	0.012032	872	tags=19%, list=10%, signal=17%	14082/70568/22340/21872/20361/22051/22339/56876/11920/18024/54601/54357/16367/232227/14678/17869/80837/20682/11853/67374/15368/18213/18214/14268/18760/11600/67916/11504/233064/23828/15117/26564/109270/17311/330662/14456/70097/14114/18590/230098/17127/240641/18128/23871/14632/67141/12767/16007/12822/18654
GO:0086004	BP	GO:0086004	regulation of cardiac muscle cell contraction	16	0.6325	1.80306	0.00294714	0.017695	0.0121249	997	tags=50%, list=11%, signal=44%	668940/16480/238871/109676/12288/14168/20191/30948
GO:0060840	BP	GO:0060840	artery development	51	-0.557064	-1.68967	0.00295111	0.0177006	0.0121288	1320	tags=33%, list=15%, signal=28%	18053/12387/18186/108154/17242/15213/70300/22339/67784/26920/13654/21380/16449/18128/14634/12767/15205
GO:0061001	BP	GO:0061001	regulation of dendritic spine morphogenesis	46	0.455632	1.72964	0.00295817	0.0177247	0.0121453	3084	tags=70%, list=35%, signal=45%	56013/327814/103967/12569/56320/58234/12361/545156/216831/13844/19699/16560/241638/192167/170731/11487/29819/12323/66713/19211/12631/17356/18472/74117/12568/13169/22215/329165/67414/74006/108100/17118
GO:0046651	BP	GO:0046651	lymphocyte proliferation	105	-0.486164	-1.61513	0.00296691	0.0177589	0.0121687	1364	tags=33%, list=16%, signal=28%	17319/20535/15510/12387/15452/22059/18950/59009/16002/51797/11486/17260/15289/11534/14082/23918/11920/12144/17869/12445/11987/12575/17698/237877/17311/12608/12578/15201/12505/109594/12767/22417/18761/15205/14609
GO:0001656	BP	GO:0001656	metanephros development	31	-0.631567	-1.7721	0.00297167	0.0177691	0.0121758	754	tags=52%, list=9%, signal=47%	243931/12387/13653/19206/11677/12705/17869/20682/58198/20681/18590/15208/14634/22417/14734/15205
GO:0060284	BP	GO:0060284	regulation of cell development	463	-0.376437	-1.35541	0.00297835	0.0177909	0.0121907	1130	tags=20%, list=13%, signal=18%	18186/13631/18950/14056/59009/107503/18208/14375/53605/17242/11486/17260/19716/15213/15114/15289/67017/229700/72057/65079/14082/20361/14580/12571/12561/66262/22339/70083/269951/67784/98733/20377/12400/100201/12257/320563/18080/66993/18081/103743/57434/17869/50913/13654/227292/18213/70433/14268/239114/12193/55927/68151/12010/18129/233064/16449/26564/20539/17311/21873/104156/13388/20674/11921/14456…
GO:0008361	BP	GO:0008361	regulation of cell size	133	0.312636	1.47911	0.00298334	0.0178024	0.0121986	1106	tags=28%, list=13%, signal=25%	16728/71751/12904/19713/26456/17762/13193/20358/17756/17755/18479/20315/56320/20359/58234/18846/20355/14567/279561/360213/52822/83704/20360/14168/19280/16885/214968/76499/16971/29869/13508/75788/12934/319740/68585/71653/56637
GO:0031573	BP	GO:0031573	mitotic intra-S DNA damage checkpoint signaling	12	-0.776623	-1.78928	0.00301583	0.0179779	0.0123188	1363	tags=67%, list=16%, signal=56%	17685/19367/15574/17535/66131/268465/50883/211651
GO:0009262	BP	GO:0009262	deoxyribonucleotide metabolic process	31	-0.629643	-1.7667	0.00302079	0.0179891	0.0123265	1165	tags=39%, list=13%, signal=34%	11637/18950/11486/11534/21915/66422/110074/20133/381101/22171/20425/20135
GO:0001556	BP	GO:0001556	oocyte maturation	20	-0.677861	-1.7388	0.00303527	0.0180569	0.012373	438	tags=30%, list=5%, signal=29%	12190/12531/69716/20878/67141/268697
GO:0002460	BP	GO:0002460	adaptive immune response based on somatic recombination of immune receptors built from immunoglobulin superfamily domains	81	-0.507404	-1.62318	0.0030437	0.0180886	0.0123947	1407	tags=36%, list=16%, signal=30%	66362/17685/15510/71890/15452/18950/11486/17260/15289/17350/70238/76438/55982/14082/22339/27354/17688/51869/103743/23882/237877/12010/16449/22256/18128/15064/26909/77777/18761
GO:1904355	BP	GO:1904355	positive regulation of telomere capping	15	-0.745557	-1.78684	0.00305823	0.018138	0.0124286	427	tags=40%, list=5%, signal=38%	11991/269400/59125/18005/20877/18761
GO:0045662	BP	GO:0045662	negative regulation of myoblast differentiation	10	-0.798562	-1.76232	0.00307166	0.0181808	0.0124578	582	tags=60%, list=7%, signal=56%	11906/20682/171170/13388/20681/18128
GO:0001964	BP	GO:0001964	startle response	18	0.592588	1.73753	0.00307113	0.0181808	0.0124578	1413	tags=56%, list=16%, signal=47%	14812/16485/22142/18189/56320/12386/14810/230103/208117/23821
GO:0006167	BP	GO:0006167	AMP biosynthetic process	13	-0.766506	-1.7944	0.00308158	0.018221	0.0124854	1424	tags=77%, list=16%, signal=64%	11564/14450/15452/18950/11486/11534/237823/67054/231327/110639
GO:0014046	BP	GO:0014046	dopamine secretion	20	0.601024	1.80971	0.00313905	0.0185232	0.0126925	1673	tags=80%, list=19%, signal=65%	19339/20979/20315/20981/11444/268860/18751/54393/229521/20980/68585/18546/20617/12801/68943/60510
GO:0014059	BP	GO:0014059	regulation of dopamine secretion	20	0.601024	1.80971	0.00313905	0.0185232	0.0126925	1673	tags=80%, list=19%, signal=65%	19339/20979/20315/20981/11444/268860/18751/54393/229521/20980/68585/18546/20617/12801/68943/60510
GO:0051972	BP	GO:0051972	regulation of telomerase activity	34	-0.600156	-1.71984	0.00315041	0.0185715	0.0127256	1214	tags=38%, list=14%, signal=33%	12387/22059/216853/21749/234344/245474/18854/17869/59125/18005/208084/20877/18761
GO:0001570	BP	GO:0001570	vasculogenesis	40	-0.605116	-1.77095	0.00316155	0.0186184	0.0127577	1214	tags=42%, list=14%, signal=37%	12387/216527/20672/18186/15213/14615/55982/21677/320910/12705/54409/11600/353156/15117/14235/18128/12192
GO:0090090	BP	GO:0090090	negative regulation of canonical Wnt signaling pathway	79	-0.50407	-1.60836	0.00318606	0.0187438	0.0128436	1385	tags=38%, list=16%, signal=32%	93960/20439/407821/20174/207181/71890/29806/12387/13653/27041/17242/70300/260305/230899/20377/328949/100201/20682/14362/70433/56458/269424/26564/20674/21416/18128/14632/20319/14634/14734
GO:0010880	BP	GO:0010880	regulation of release of sequestered calcium ion into cytosol by sarcoplasmic reticulum	16	0.628894	1.79278	0.00323326	0.0189451	0.0129816	1910	tags=62%, list=22%, signal=49%	68312/14226/108058/238871/109676/20191/12313/20541/12315/320790
GO:0014808	BP	GO:0014808	release of sequestered calcium ion into cytosol by sarcoplasmic reticulum	16	0.628894	1.79278	0.00323326	0.0189451	0.0129816	1910	tags=62%, list=22%, signal=49%	68312/14226/108058/238871/109676/20191/12313/20541/12315/320790
GO:1903514	BP	GO:1903514	release of sequestered calcium ion into cytosol by endoplasmic reticulum	16	0.628894	1.79278	0.00323326	0.0189451	0.0129816	1910	tags=62%, list=22%, signal=49%	68312/14226/108058/238871/109676/20191/12313/20541/12315/320790
GO:0021954	BP	GO:0021954	central nervous system neuron development	59	0.408385	1.61188	0.00324703	0.0190067	0.0130238	1082	tags=34%, list=12%, signal=30%	21367/270190/13193/170758/17756/77630/18212/59058/18187/99512/18072/11444/18846/110532/384569/13844/235402/230101/14682/13176
GO:0001963	BP	GO:0001963	synaptic transmission, dopaminergic	11	0.715508	1.85662	0.0032533	0.0190068	0.0130239	1672	tags=73%, list=19%, signal=59%	60613/11444/170571/14251/20617/208117/269642/68943
GO:1905144	BP	GO:1905144	response to acetylcholine	18	0.59006	1.73011	0.00325357	0.0190068	0.0130239	577	tags=50%, list=7%, signal=47%	110834/18795/12569/23934/109305/234214/11444/18751/20411
GO:0016482	BP	GO:0016482	cytosolic transport	123	0.317439	1.51362	0.00328055	0.0191071	0.0130926	3200	tags=55%, list=37%, signal=35%	12721/16572/70028/327814/17756/270192/11981/57440/360213/16561/320615/19346/16560/20779/13191/68299/14339/68767/231717/77963/53612/20661/111173/72477/69091/213760/28006/217342/74718/67581/54399/66713/100504663/56433/68365/218699/26419/19349/320191/68505/211556/18016/56389/73288/320473/65114/56418/70834/67300/55943/70297/224705/216344/104831/233204/100855/16783/245886/271457/67166/231876/380752/10…
GO:1903706	BP	GO:1903706	regulation of hemopoiesis	173	-0.440423	-1.52312	0.00330188	0.019199	0.0131555	1417	tags=32%, list=16%, signal=28%	18103/50794/26992/56456/268564/223870/63953/11350/215653/19766/15526/18996/21847/14357/20535/17387/12387/18950/59009/14375/17242/11486/17260/15289/67017/229700/72057/14082/12571/66262/20377/12400/100201/66993/18081/17869/239114/12193/12010/18129/16449/26564/17311/21873/13388/14456/12608/12578/14087/12505/97165/17863/23871/14634/211651/12192
GO:0050801	BP	GO:0050801	monoatomic ion homeostasis	262	0.255878	1.31201	0.00330291	0.019199	0.0131555	1547	tags=26%, list=18%, signal=22%	68312/14812/269615/18799/668940/14226/12721/64051/278279/66168/232975/108058/16485/18795/56506/12176/238871/94249/170770/211401/74772/109676/18751/11735/78506/279561/12288/19165/11975/14806/19122/110891/12709/12298/83704/235380/14810/65113/20191/72828/65945/20536/12652/75607/52898/59049/100126824/80795/236794/54411/11984/20617/64176/12801/12313/11972/59033/72825/14299/11820/11966/170731/17357/119…
GO:0032210	BP	GO:0032210	regulation of telomere maintenance via telomerase	43	-0.571764	-1.70028	0.00331002	0.0192212	0.0131708	1281	tags=28%, list=15%, signal=24%	108689/12387/21749/28113/11920/245474/18854/59125/18005/208084/20877/18761
GO:0048663	BP	GO:0048663	neuron fate commitment	37	-0.605947	-1.76598	0.00331695	0.0192422	0.0131852	1515	tags=46%, list=17%, signal=38%	16911/18996/18992/12387/58208/15376/20682/20664/50913/18213/21380/13388/20674/11921/14633/18128/14634
GO:0017145	BP	GO:0017145	stem cell division	27	-0.655078	-1.78224	0.00332817	0.0192882	0.0132167	635	tags=44%, list=7%, signal=41%	232187/69260/30877/26920/209012/12193/104156/171167/12578/17863/18128/20319
GO:0046620	BP	GO:0046620	regulation of organ growth	62	-0.528017	-1.63041	0.00342101	0.0198066	0.0135719	1188	tags=29%, list=14%, signal=25%	232334/67603/11546/211652/16002/17260/56449/106628/14815/18712/52357/21416/18128/14632/19662/268697/12534/14609
GO:0048169	BP	GO:0048169	regulation of long-term neuronal synaptic plasticity	22	0.587601	1.83335	0.00343377	0.0198608	0.013609	1883	tags=59%, list=22%, signal=46%	14812/20977/116837/58234/14806/14810/13844/20617/13385/11820/12323/240057/240028
GO:0042476	BP	GO:0042476	odontogenesis	42	-0.582216	-1.72495	0.00344133	0.0198662	0.0136127	1774	tags=45%, list=20%, signal=36%	433759/14182/12166/94220/20535/18053/18029/12387/58208/58235/68151/21380/494504/13388/21416/14633/16776/14634/14451
GO:0042273	BP	GO:0042273	ribosomal large subunit biogenesis	59	-0.542505	-1.66446	0.00344152	0.0198662	0.0136127	3471	tags=86%, list=40%, signal=52%	67459/234549/68077/59050/67949/107071/66229/100038991/67671/110954/72284/229937/70285/225215/19989/66164/66489/67025/19941/100019/64934/68193/100503670/66282/19988/66942/268449/57815/69237/57750/74035/231452/69072/57808/448850/66596/110109/11837/67832/69902/28126/67223/57741/67920/217011/67236/56095/67115/235036/59014/18148
GO:0035265	BP	GO:0035265	organ growth	103	-0.488627	-1.62021	0.00345798	0.0199415	0.0136643	1214	tags=26%, list=14%, signal=23%	12387/232334/67603/11546/211652/16002/17260/56449/106628/68259/14815/11749/20682/70235/18214/18712/52357/13388/21416/20181/59056/18128/14632/19662/268697/12534/14609
GO:0030326	BP	GO:0030326	embryonic limb morphogenesis	65	-0.532385	-1.65904	0.00348026	0.0199909	0.0136982	1014	tags=25%, list=12%, signal=22%	234740/16973/70300/19206/58198/66910/11695/18129/26564/14633/18128/20319/14634/14451/14734/14609
GO:0035113	BP	GO:0035113	embryonic appendage morphogenesis	65	-0.532385	-1.65904	0.00348026	0.0199909	0.0136982	1014	tags=25%, list=12%, signal=22%	234740/16973/70300/19206/58198/66910/11695/18129/26564/14633/18128/20319/14634/14451/14734/14609
GO:0030199	BP	GO:0030199	collagen fibril organization	24	-0.653608	-1.73139	0.00350674	0.0201233	0.0137889	914	tags=33%, list=11%, signal=30%	69675/56693/18214/20319/237360/12832/16949/12822
GO:0010976	BP	GO:0010976	positive regulation of neuron projection development	157	0.294744	1.43051	0.00351778	0.020147	0.0138051	1863	tags=34%, list=21%, signal=27%	22240/19713/50769/20257/14226/234593/20713/17762/73710/15572/11785/77480/18212/18189/71951/241514/16570/13803/23969/56320/225849/12361/18010/330863/103199/75769/545156/16971/13844/19699/12805/14360/13176/18546/12801/192167/12492/22084/216739/382056/12305/170731/29819/320840/14348/19242/12323/12484/16150/100310872/11352/69601/66713
GO:0048490	BP	GO:0048490	anterograde synaptic vesicle transport	17	0.622706	1.80272	0.00354818	0.0202614	0.0138836	2772	tags=82%, list=32%, signal=56%	12794/17756/360213/67774/228355/232946/64933/11777/11776/20615/73689/11775/17828/18457
GO:0099514	BP	GO:0099514	synaptic vesicle cytoskeletal transport	17	0.622706	1.80272	0.00354818	0.0202614	0.0138836	2772	tags=82%, list=32%, signal=56%	12794/17756/360213/67774/228355/232946/64933/11777/11776/20615/73689/11775/17828/18457
GO:0099517	BP	GO:0099517	synaptic vesicle transport along microtubule	17	0.622706	1.80272	0.00354818	0.0202614	0.0138836	2772	tags=82%, list=32%, signal=56%	12794/17756/360213/67774/228355/232946/64933/11777/11776/20615/73689/11775/17828/18457
GO:0010807	BP	GO:0010807	regulation of synaptic vesicle priming	10	0.726345	1.84513	0.00357047	0.020329	0.0139299	2179	tags=90%, list=25%, signal=68%	19339/116837/56216/20910/17957/22249/382018/78808/108124
GO:0061323	BP	GO:0061323	cell proliferation involved in heart morphogenesis	13	-0.763217	-1.7867	0.00359045	0.020403	0.0139805	1214	tags=54%, list=14%, signal=46%	12387/14707/20682/18712/21380/18128/15205
GO:2000136	BP	GO:2000136	regulation of cell proliferation involved in heart morphogenesis	13	-0.763217	-1.7867	0.00359045	0.020403	0.0139805	1214	tags=54%, list=14%, signal=46%	12387/14707/20682/18712/21380/18128/15205
GO:0090169	BP	GO:0090169	regulation of spindle assembly	22	-0.664909	-1.73889	0.00367313	0.0208322	0.0142747	887	tags=36%, list=10%, signal=33%	72776/73420/219103/76123/20460/54141/18817/209737
GO:1904356	BP	GO:1904356	regulation of telomere maintenance via telomere lengthening	51	-0.551756	-1.67357	0.00367198	0.0208322	0.0142747	1281	tags=27%, list=15%, signal=24%	108689/269400/12387/21749/28113/234344/11920/245474/18854/59125/18005/208084/20877/18761
GO:0021532	BP	GO:0021532	neural tube patterning	31	-0.622724	-1.74729	0.00370843	0.0210121	0.0143979	988	tags=26%, list=11%, signal=23%	15376/19206/66910/72507/14633/14634/14451/15205
GO:0030010	BP	GO:0030010	establishment of cell polarity	107	-0.471268	-1.57232	0.0037157	0.0210328	0.0144121	1115	tags=24%, list=13%, signal=21%	232288/26951/15213/244329/214444/14107/338362/102124/76123/208177/17698/72823/67203/56150/72080/107351/22390/240641/15208/70385/54141/18817/12615/67052/15205/14609
GO:0010718	BP	GO:0010718	positive regulation of epithelial to mesenchymal transition	21	-0.677797	-1.76058	0.003734	0.0211159	0.0144691	1308	tags=43%, list=15%, signal=36%	71890/12387/14056/17242/68010/16449/21416/17127/18128
GO:1901381	BP	GO:1901381	positive regulation of potassium ion transmembrane transport	22	0.584869	1.82482	0.00377374	0.02132	0.0146089	553	tags=36%, list=6%, signal=34%	241528/14419/16485/432442/16502/109676/279561/13483
GO:0090100	BP	GO:0090100	positive regulation of transmembrane receptor protein serine/threonine kinase signaling pathway	53	-0.545545	-1.65496	0.00380252	0.0214204	0.0146777	637	tags=15%, list=7%, signal=14%	12577/18129/15208/18128/16007/14560/14734/15205
GO:0090501	BP	GO:0090501	RNA phosphodiester bond hydrolysis	49	-0.555434	-1.67873	0.00383984	0.0215889	0.0147932	2781	tags=65%, list=32%, signal=45%	219094/215194/30946/50912/69920/68276/213550/104662/66481/244871/108062/74035/213895/54188/67724/67842/19819/59028/68219/66362/54364/52530/83703/212442/67276/66446/59014/69639/71151/18148/208366/227715
GO:0198738	BP	GO:0198738	cell-cell signaling by wnt	248	-0.414037	-1.45821	0.00390774	0.0219496	0.0150403	1385	tags=22%, list=16%, signal=19%	20174/381259/207181/14160/71890/56505/29806/12387/13653/232334/27041/17242/219134/16973/64297/70300/260305/230899/20438/68259/68010/20377/328949/100201/17869/20682/58198/14362/70433/20969/56458/67916/68151/269424/26564/27412/12447/494504/20674/14783/21416/107351/12505/17127/16543/18128/14632/20319/12443/14634/22417/14734/12316/218581
GO:0060252	BP	GO:0060252	positive regulation of glial cell proliferation	17	-0.692253	-1.72387	0.00392798	0.0220208	0.0150891	1072	tags=41%, list=12%, signal=36%	18208/14580/12257/17869/20539/104156/17863
GO:0061025	BP	GO:0061025	membrane fusion	98	0.335286	1.51791	0.0039375	0.022053	0.0151112	2200	tags=39%, list=25%, signal=29%	19339/12721/20979/116837/56216/53331/20981/74772/22318/20910/229521/12889/12287/20980/20617/20614/353047/218035/116733/53612/233405/75202/105513/234852/111173/209018/60510/269338/67474/108083/14809/68953/11652/56041/67064/67826/20615/19349
GO:0009162	BP	GO:0009162	deoxyribonucleoside monophosphate metabolic process	18	-0.687039	-1.7247	0.00400023	0.0223829	0.0153372	1107	tags=44%, list=13%, signal=39%	18950/11486/11534/110074/381101/22171/20425/21877
GO:0031960	BP	GO:0031960	response to corticosteroid	35	-0.601707	-1.73471	0.00403803	0.0225727	0.0154673	704	tags=29%, list=8%, signal=26%	14815/74551/83383/12193/19712/20181/110784/13685/17927/12192
GO:0030252	BP	GO:0030252	growth hormone secretion	15	0.633612	1.81009	0.00406786	0.022696	0.0155518	1910	tags=53%, list=22%, signal=42%	16443/12288/54393/545156/228355/76055/54126/320790
GO:0060561	BP	GO:0060561	apoptotic process involved in morphogenesis	10	-0.792323	-1.74855	0.00406627	0.022696	0.0155518	1293	tags=70%, list=15%, signal=60%	12018/16973/12955/18854/12578/18128/16007
GO:1903053	BP	GO:1903053	regulation of extracellular matrix organization	24	-0.648801	-1.71866	0.00411222	0.0229216	0.0157063	806	tags=54%, list=9%, signal=49%	12633/11350/71890/226519/102693/208177/20682/18214/15117/17127/18128/23871/14186
GO:0060485	BP	GO:0060485	mesenchyme development	151	-0.452552	-1.55387	0.00411795	0.0229316	0.0157132	1308	tags=27%, list=15%, signal=23%	71890/20349/70769/12387/18186/14056/17242/17260/15213/15376/106628/70300/21453/20361/21677/102693/22339/68010/20377/11749/208177/17869/20682/14268/21380/15117/16449/100182/17311/21416/20681/20181/16776/17127/18128/20319/22417/71878/15205/12192/14609
GO:0032212	BP	GO:0032212	positive regulation of telomere maintenance via telomerase	26	-0.645218	-1.73081	0.00412345	0.0229404	0.0157192	724	tags=23%, list=8%, signal=21%	11920/245474/59125/18005/20877/18761
GO:0003179	BP	GO:0003179	heart valve morphogenesis	20	-0.670584	-1.72013	0.00420854	0.0233381	0.0159918	1027	tags=45%, list=12%, signal=40%	17260/15213/20682/18129/16449/116701/18128/13717/16007
GO:0032943	BP	GO:0032943	mononuclear cell proliferation	108	-0.475953	-1.5875	0.0042034	0.0233381	0.0159918	1364	tags=32%, list=16%, signal=28%	17319/20535/15510/12387/15452/22059/18950/59009/16002/51797/11486/17260/15289/11534/14082/23918/11920/12144/17869/12445/11987/12575/17698/237877/17311/12608/12578/15201/12505/109594/12767/22417/18761/15205/14609
GO:0006873	BP	GO:0006873	intracellular monoatomic ion homeostasis	223	0.266873	1.38969	0.00421094	0.0233381	0.0159918	2338	tags=39%, list=27%, signal=30%	68312/14812/269615/18799/668940/14226/12721/64051/66168/232975/108058/18795/12176/238871/94249/170770/74772/109676/18751/78506/12288/19165/11975/14806/19122/110891/12709/12298/235380/14810/65113/20191/72828/65945/20536/12652/52898/100126824/80795/236794/54411/11984/20617/64176/12801/12313/11972/59033/72825/14299/11820/11966/170731/17357/11933/14385/18750/20541/111173/13198/12286/11927/107771/2204…
GO:0001775	BP	GO:0001775	cell activation	413	-0.374834	-1.3427	0.00420988	0.0233381	0.0159918	1364	tags=23%, list=16%, signal=20%	17319/17685/14357/20535/14629/15510/71890/17886/12018/20909/17387/15979/12387/13653/15452/22059/18950/14056/59009/14375/16002/51797/58208/17242/11486/17260/15289/17350/70238/52683/72057/11534/55982/16852/14082/230899/12571/23918/27354/20377/12400/22038/210293/17688/11920/320910/51869/18477/66993/103743/12144/17869/12445/11987/102545/15368/12575/18214/14268/17698/23882/12193/237877/16848/12010/181…
GO:0007274	BP	GO:0007274	neuromuscular synaptic transmission	15	0.631229	1.80328	0.0042295	0.0234187	0.016047	1722	tags=87%, list=20%, signal=70%	108015/110834/19339/18189/11444/20910/110532/16561/192167/237611/111173/12484/12286
GO:0030217	BP	GO:0030217	T cell differentiation	127	-0.452034	-1.52602	0.00426834	0.0236114	0.016179	1653	tags=31%, list=19%, signal=26%	26992/56456/268564/63953/11350/18021/19934/12043/14357/20535/12387/13653/22059/18950/59009/58208/17242/11486/15289/52683/72057/14082/12571/12400/66993/103743/12144/23882/12193/16848/12010/12578/14087/12505/17863/15064/14634/211651/22417/12192
GO:0048705	BP	GO:0048705	skeletal system morphogenesis	97	-0.473487	-1.55539	0.00437618	0.0241622	0.0165564	1259	tags=27%, list=14%, signal=23%	12406/17387/12387/17260/54352/16973/70300/22339/16332/68259/20377/11749/17869/20682/269941/66910/70235/79456/21380/11695/15117/26564/17127/14634/14451/15245
GO:0042098	BP	GO:0042098	T cell proliferation	81	-0.498771	-1.59556	0.00440632	0.0243055	0.0166547	1214	tags=30%, list=14%, signal=26%	12387/22059/18950/59009/16002/51797/15289/11534/14082/12144/17869/12445/11987/17698/17311/12608/12578/12505/109594/12767/22417/18761/15205/14609
GO:0031670	BP	GO:0031670	cellular response to nutrient	14	-0.735449	-1.74269	0.00441163	0.0243119	0.016659	988	tags=43%, list=11%, signal=38%	15376/69305/18712/14456/20181/16956
GO:0006942	BP	GO:0006942	regulation of striated muscle contraction	37	0.484112	1.73687	0.00444362	0.0244519	0.016755	1213	tags=38%, list=14%, signal=33%	11847/668940/14226/16480/238871/109676/57440/12288/17131/14168/20191/12652/30948/12313
GO:0051249	BP	GO:0051249	regulation of lymphocyte activation	184	-0.434725	-1.51255	0.0044538	0.0244519	0.016755	1364	tags=26%, list=16%, signal=22%	17319/17685/14357/20535/15510/71890/17387/12387/18950/59009/14375/16002/17242/11486/17260/15289/17350/72057/11534/55982/16852/14082/20377/12400/11920/51869/66993/12144/11987/12575/12193/237877/12010/17311/14456/12608/225471/12578/14087/12505/214763/109594/14634/211651/77777/18761/15205/12192
GO:0045860	BP	GO:0045860	positive regulation of protein kinase activity	185	-0.434236	-1.51174	0.00444917	0.0244519	0.016755	913	tags=17%, list=11%, signal=16%	66616/64297/18148/22359/22339/71943/12445/70891/18213/12575/18214/21987/18712/11600/12531/26564/77744/17311/14456/70097/18590/56742/20460/13605/12443/23834/16007/268697/229841/269582/72119/381293
GO:2000273	BP	GO:2000273	positive regulation of signaling receptor activity	20	0.589043	1.77363	0.00450652	0.0246537	0.0168932	882	tags=35%, list=10%, signal=32%	23892/12569/58234/81905/13844/19699/15980
GO:0060038	BP	GO:0060038	cardiac muscle cell proliferation	35	-0.598682	-1.72599	0.00451589	0.0246537	0.0168932	457	tags=23%, list=5%, signal=22%	18712/20181/18128/14632/19662/268697/12534/14609
GO:0030501	BP	GO:0030501	positive regulation of bone mineralization	20	-0.66823	-1.71409	0.00451461	0.0246537	0.0168932	351	tags=35%, list=4%, signal=34%	106522/17260/110789/20181/17127/16007/22417
GO:0070227	BP	GO:0070227	lymphocyte apoptotic process	44	-0.570905	-1.69996	0.00450802	0.0246537	0.0168932	1584	tags=43%, list=18%, signal=35%	57741/12043/19766/17319/12018/22059/18950/58208/11486/14082/12144/30954/17869/12369/12505/50883/14634/20877/18761
GO:0048103	BP	GO:0048103	somatic stem cell division	11	-0.767037	-1.74056	0.00460082	0.0250938	0.0171948	539	tags=45%, list=6%, signal=43%	209012/12193/171167/12578/18128
GO:0030282	BP	GO:0030282	bone mineralization	46	-0.568134	-1.69256	0.00461201	0.0251139	0.0172086	1090	tags=33%, list=13%, signal=29%	106522/17260/20937/57295/68259/20682/18214/110789/21416/20181/17127/16007/22417/14734/14609
GO:0048709	BP	GO:0048709	oligodendrocyte differentiation	56	-0.53895	-1.64505	0.00461311	0.0251139	0.0172086	638	tags=29%, list=7%, signal=27%	52615/17242/75786/103743/20682/20664/50913/209012/11923/21416/20681/15208/18128/14634/12767/15205
GO:0035235	BP	GO:0035235	ionotropic glutamate receptor signaling pathway	11	0.704439	1.8279	0.0046587	0.0252913	0.0173301	1338	tags=73%, list=15%, signal=62%	14812/232975/12569/67579/545156/14810/11820/14800
GO:0060443	BP	GO:0060443	mammary gland morphogenesis	23	-0.666546	-1.75098	0.00466723	0.0252913	0.0173301	1072	tags=43%, list=12%, signal=38%	18208/16973/19206/14815/18854/104156/12578/14633/14634/22417
GO:0003231	BP	GO:0003231	cardiac ventricle development	63	-0.521229	-1.61372	0.00466897	0.0252913	0.0173301	1027	tags=24%, list=12%, signal=21%	17260/15213/229700/66993/26920/58198/14362/16449/116701/20181/18128/20319/12767/16007/15205
GO:0048736	BP	GO:0048736	appendage development	99	-0.466444	-1.53808	0.00467816	0.0252913	0.0173301	1090	tags=21%, list=13%, signal=19%	106522/234740/16973/18541/70300/68259/19206/20682/58198/66910/64075/11695/18129/26564/14633/18128/20319/14634/14451/14734/14609
GO:0060173	BP	GO:0060173	limb development	99	-0.466444	-1.53808	0.00467816	0.0252913	0.0173301	1090	tags=21%, list=13%, signal=19%	106522/234740/16973/18541/70300/68259/19206/20682/58198/66910/64075/11695/18129/26564/14633/18128/20319/14634/14451/14734/14609
GO:0061061	BP	GO:0061061	muscle structure development	350	-0.392238	-1.39409	0.00468036	0.0252913	0.0173301	1243	tags=20%, list=14%, signal=18%	243931/17387/12387/13653/60406/226519/14056/11546/16002/17260/15213/56449/286940/109711/106628/72057/53599/16852/56190/22339/22634/19205/54601/14815/13433/66993/18081/12955/225115/17869/20682/11910/13654/14733/107869/14362/20969/19221/54409/13008/11600/74490/107831/117606/21380/11695/23828/56312/116701/54132/171170/13388/330662/19712/21416/20681/20181/16776/68794/17127/18128/13717/53318/30794/179…
GO:0030048	BP	GO:0030048	actin filament-based movement	52	0.419267	1.61548	0.00468644	0.0253007	0.0173366	1542	tags=38%, list=18%, signal=32%	668940/71960/16480/108058/238871/56320/109676/12288/14168/12293/20191/17912/30948/83814/71653/17904/14026/235281/214459/12289
GO:2000243	BP	GO:2000243	positive regulation of reproductive process	37	-0.595632	-1.73592	0.00470098	0.0253323	0.0173582	792	tags=30%, list=9%, signal=27%	22339/20682/12531/16848/19362/20878/12532/67141/68549/22417/14609
GO:0072666	BP	GO:0072666	establishment of protein localization to vacuole	43	0.443419	1.63205	0.00469791	0.0253323	0.0173582	2812	tags=60%, list=32%, signal=41%	194309/81905/66914/75788/68299/72825/12492/54377/218035/116733/20661/209018/74718/320528/11776/100504663/218699/19349/270096/70297/230895/107305/15239/52348/104831/20955
GO:1904358	BP	GO:1904358	positive regulation of telomere maintenance via telomere lengthening	30	-0.623528	-1.73172	0.00485747	0.0261515	0.0179195	1247	tags=30%, list=14%, signal=26%	269400/12387/234344/11920/245474/59125/18005/20877/18761
GO:0086003	BP	GO:0086003	cardiac muscle cell contraction	29	0.510904	1.75901	0.0048694	0.0261915	0.017947	998	tags=38%, list=11%, signal=34%	668940/16480/108058/238871/109676/12288/14168/12293/20191/30948/83814
GO:0042063	BP	GO:0042063	gliogenesis	184	-0.431021	-1.49966	0.00499599	0.026823	0.0183797	1224	tags=25%, list=14%, signal=22%	15979/12387/13167/22059/14056/107503/18208/52615/17242/75786/14176/14580/12571/70083/269951/12257/14815/103743/17869/20682/20664/50913/13654/14733/209012/18213/14268/11923/234094/67916/26564/20539/494504/104156/13388/11921/21416/20681/236539/17863/15208/18128/14634/12767/18742/15205
GO:0071385	BP	GO:0071385	cellular response to glucocorticoid stimulus	23	-0.664247	-1.74494	0.00502043	0.0269294	0.0184526	704	tags=35%, list=8%, signal=32%	14815/74551/83383/12193/19712/13685/17927/12192
GO:2000737	BP	GO:2000737	negative regulation of stem cell differentiation	19	-0.692949	-1.76617	0.00512516	0.0274408	0.018803	713	tags=42%, list=8%, signal=39%	14056/18024/12193/16449/19712/15208/18128/15205
GO:0007163	BP	GO:0007163	establishment or maintenance of cell polarity	152	-0.442428	-1.51741	0.00514845	0.0275402	0.0188711	1115	tags=24%, list=13%, signal=21%	232288/26951/20733/15213/75786/244329/216274/207792/22350/214444/14107/104215/338362/102124/76123/208177/80837/17698/72823/67203/170736/54132/56150/72080/107351/22390/240641/15208/70385/54141/18817/12615/73804/67052/15205/14609
GO:0085029	BP	GO:0085029	extracellular matrix assembly	21	-0.667608	-1.73411	0.00515646	0.0275578	0.0188832	914	tags=43%, list=11%, signal=38%	69675/102693/208177/20682/54409/15117/17127/18128/13717
GO:0040029	BP	GO:0040029	epigenetic regulation of gene expression	141	-0.44433	-1.51694	0.00517029	0.0276064	0.0189165	1949	tags=33%, list=22%, signal=26%	12417/13018/223828/78878/13435/19720/21849/433759/51810/116870/26992/140858/73139/20466/57741/74355/109113/59001/13626/232187/12593/331623/17692/22059/666704/14056/52615/15289/20937/229700/217578/16906/16907/14815/51869/13433/12577/107435/218973/76073/15201/11810/12566/12649/12189/18140
GO:0009126	BP	GO:0009126	purine nucleoside monophosphate metabolic process	24	-0.640144	-1.69573	0.00522275	0.0278149	0.0190593	1506	tags=58%, list=17%, signal=48%	13178/11564/14450/15452/11637/18950/11486/11534/237823/23918/67054/231327/110639/381101
GO:0035999	BP	GO:0035999	tetrahydrofolate interconversion	11	-0.763849	-1.73332	0.0052295	0.0278207	0.0190633	590	tags=55%, list=7%, signal=51%	108037/108156/17768/13361/22171/20425
GO:1902774	BP	GO:1902774	late endosome to lysosome transport	15	0.62202	1.77697	0.00525319	0.0279213	0.0191323	3012	tags=87%, list=35%, signal=57%	73205/353047/218035/116733/105513/234852/269338/68953/67064/20615/65114/76959/67166
GO:0007517	BP	GO:0007517	muscle organ development	163	-0.43224	-1.49027	0.00526672	0.0279678	0.0191641	1052	tags=21%, list=12%, signal=19%	16002/17260/15213/56449/286940/53599/22634/54601/12955/225115/17869/11910/13654/14733/14362/11600/107831/117606/21380/11695/23828/56312/116701/13388/21416/20681/20181/16776/17127/18128/13717/17927/108000/14609
GO:0001910	BP	GO:0001910	regulation of leukocyte mediated cytotoxicity	17	-0.683698	-1.70257	0.00531745	0.0281625	0.0192975	1209	tags=47%, list=14%, signal=41%	11692/18950/16002/14082/54725/12010/15064/77777
GO:0050657	BP	GO:0050657	nucleic acid transport	113	-0.455668	-1.52755	0.00532269	0.0281625	0.0192975	2431	tags=48%, list=28%, signal=35%	20383/227720/66441/72124/20823/73666/53817/71701/110809/71805/192170/107939/28114/14265/22608/208691/16211/17149/229279/69482/223527/103573/67681/66011/140488/16549/234865/237082/225027/218210/69912/226747/59015/445007/103468/170762/73192/21681/227699/72787/76438/223921/18226/18148/74013/56488/170676/19384/54563/20492/69736/140486/22117/12192
GO:0050658	BP	GO:0050658	RNA transport	113	-0.455668	-1.52755	0.00532269	0.0281625	0.0192975	2431	tags=48%, list=28%, signal=35%	20383/227720/66441/72124/20823/73666/53817/71701/110809/71805/192170/107939/28114/14265/22608/208691/16211/17149/229279/69482/223527/103573/67681/66011/140488/16549/234865/237082/225027/218210/69912/226747/59015/445007/103468/170762/73192/21681/227699/72787/76438/223921/18226/18148/74013/56488/170676/19384/54563/20492/69736/140486/22117/12192
GO:0016358	BP	GO:0016358	dendrite development	233	0.265572	1.37966	0.00531075	0.0281625	0.0192975	2103	tags=37%, list=24%, signal=29%	110834/83766/270190/665113/17760/56013/211134/13193/15572/77480/327814/65254/17756/16443/17755/18212/208922/18479/103967/12569/23969/56320/11444/269397/243961/12386/67287/58234/93691/12361/17754/216856/60597/238276/93686/545156/19280/216831/14810/13844/237868/19699/13508/18163/14270/83814/16560/14360/56637/236794/241638/192167/13385/22084/11820/102774/382253/382056/170731/18483/19055/60409/11487/…
GO:0051963	BP	GO:0051963	regulation of synapse assembly	80	0.351387	1.53461	0.00534801	0.0282708	0.0193718	1584	tags=39%, list=18%, signal=32%	107065/270190/20450/56013/211134/18212/18189/232370/11444/216856/19280/319387/14810/13844/65945/272381/18708/15569/80749/16981/56637/241638/20617/192167/13643/11820/105689/76965/29819/18750/320840
GO:2001022	BP	GO:2001022	positive regulation of response to DNA damage stimulus	128	-0.448942	-1.51807	0.00536228	0.028295	0.0193883	1984	tags=37%, list=23%, signal=29%	14265/75698/245000/12054/21849/191578/14359/78656/67711/26992/56456/114715/56207/65964/74355/11545/20174/71890/56505/19367/18950/216853/67872/15289/70681/22594/70238/72057/55982/225182/22038/11920/237211/51869/14051/66993/381678/224008/12144/17869/18538/21853/12578/19362/14235/12189/234396
GO:0006611	BP	GO:0006611	protein export from nucleus	52	-0.545074	-1.65345	0.0053815	0.0283708	0.0194402	1603	tags=37%, list=18%, signal=30%	103573/66011/70686/15526/22166/329506/110750/19387/56488/215280/19384/13654/67628/27412/14456/240084/12578/12021/234396
GO:0035019	BP	GO:0035019	somatic stem cell population maintenance	44	-0.565941	-1.68518	0.00543638	0.0286342	0.0196207	931	tags=27%, list=11%, signal=24%	16973/20377/51869/17869/20682/58198/12193/20674/19712/21416/12578/15205
GO:0000466	BP	GO:0000466	maturation of 5.8S rRNA from tricistronic rRNA transcript (SSU-rRNA, 5.8S rRNA, LSU-rRNA)	21	-0.667238	-1.73315	0.00546278	0.0287473	0.0196983	2722	tags=90%, list=31%, signal=62%	215194/30946/50912/64934/66481/57750/74035/67842/59028/66362/56095/67276/66446/59014/69639/71151/18148/208366/227715
GO:0072331	BP	GO:0072331	signal transduction by p53 class mediator	105	-0.472835	-1.57084	0.00546963	0.0287575	0.0197052	1390	tags=30%, list=16%, signal=25%	18996/17319/17685/230784/67071/18432/22059/68539/51800/59014/55982/56190/18148/57913/11920/83383/75736/18854/17869/12575/245527/237877/17349/12190/242705/56312/12578/12505/52679/14235/50883
GO:0031100	BP	GO:0031100	animal organ regeneration	14	-0.731449	-1.73321	0.0054794	0.0287829	0.0197226	530	tags=64%, list=6%, signal=60%	16438/11692/14056/15368/12608/20878/14632/12443/12534
GO:0001578	BP	GO:0001578	microtubule bundle formation	44	-0.563963	-1.67929	0.00552931	0.0289928	0.0198665	938	tags=30%, list=11%, signal=26%	56430/223921/214444/109065/433956/26920/627872/209012/17427/56742/18817/233406/19348
GO:0019827	BP	GO:0019827	stem cell population maintenance	137	-0.433011	-1.47184	0.00552705	0.0289928	0.0198665	1378	tags=23%, list=16%, signal=20%	69790/21847/226026/72515/20843/14088/69260/60406/30877/244329/16973/72057/245688/20377/51869/17869/20682/58198/140486/56458/12193/233064/13388/20674/171167/19712/21416/12578/15208/211651/12316/15205
GO:1904035	BP	GO:1904035	regulation of epithelial cell apoptotic process	51	-0.541894	-1.64366	0.00556915	0.0291756	0.0199917	1645	tags=37%, list=19%, signal=30%	12633/11350/12043/110829/20747/236266/51800/17242/18024/15368/57875/54409/11600/56312/11921/14456/21416/12822/12192
GO:0042446	BP	GO:0042446	hormone biosynthetic process	18	-0.6785	-1.70326	0.00559075	0.0292362	0.0200332	1213	tags=44%, list=14%, signal=38%	13653/16002/78925/14815/20778/19712/20856/22417
GO:0008654	BP	GO:0008654	phospholipid biosynthetic process	131	0.307003	1.45017	0.00564923	0.0294892	0.0202066	2359	tags=41%, list=27%, signal=30%	192156/232086/13869/208715/13139/236899/15926/18710/668212/240752/56077/18709/11305/16329/68671/68603/14077/18708/68262/56442/14705/76500/110196/67216/18717/216739/17855/320951/319554/70310/26457/24057/27399/67630/14245/16592/52858/20773/108083/100504663/66612/380921/13481/233011/12651/110911/55979/224020/216233/56468/55980/14792/226856/67292
GO:0070986	BP	GO:0070986	left/right axis specification	10	-0.783962	-1.7301	0.00570446	0.0297243	0.0203677	377	tags=50%, list=4%, signal=48%	226352/18129/13388/17427/18128
GO:1903305	BP	GO:1903305	regulation of regulated secretory pathway	77	0.355622	1.52788	0.00571387	0.0297468	0.0203831	1722	tags=48%, list=20%, signal=39%	19339/100503659/327814/207227/20977/20979/116837/20981/27062/20964/22318/18751/20910/12361/12290/12298/19340/242662/229521/72194/18645/20980/22249/110279/64176/12048/192167/59033/14299/26431/18750/67808/213760/56807/60510/67474/12286
GO:0048762	BP	GO:0048762	mesenchymal cell differentiation	131	-0.445086	-1.50805	0.00575947	0.0299575	0.0205275	1308	tags=28%, list=15%, signal=24%	71890/20349/70769/12387/18186/14056/17242/17260/15213/15376/106628/70300/21453/20361/102693/22339/68010/20377/11749/208177/20682/14268/21380/15117/16449/100182/17311/21416/20681/16776/17127/18128/20319/22417/71878/15205/14609
GO:0009069	BP	GO:0009069	serine family amino acid metabolic process	21	-0.666143	-1.73031	0.00576909	0.0299617	0.0205304	1349	tags=57%, list=16%, signal=48%	14450/14629/109079/108037/107272/100678/108156/107869/13361/22117/236539/20425
GO:0032103	BP	GO:0032103	positive regulation of response to external stimulus	178	-0.419511	-1.45357	0.00577055	0.0299617	0.0205304	1713	tags=28%, list=20%, signal=23%	85305/13205/22031/14182/216190/12261/20466/242864/67917/19376/67070/20085/19766/17319/15510/20909/73945/18186/14375/17242/15289/76438/64297/16852/14082/22340/230899/22339/22038/54725/18081/67486/18213/14268/78781/18760/56312/20787/14456/70097/12608/225471/17127/97165/214763/23871/16956/12767/18654/77777
GO:0006612	BP	GO:0006612	protein targeting to membrane	77	0.355371	1.5268	0.00577843	0.0299759	0.0205401	1189	tags=23%, list=14%, signal=20%	12295/192950/27008/18479/12569/229801/14567/11735/19122/194309/208884/12297/19062/218544/14360/68818/18633/75219
GO:0048265	BP	GO:0048265	response to pain	13	0.660497	1.79512	0.00581681	0.0300681	0.0206033	880	tags=54%, list=10%, signal=48%	20269/14812/19713/73242/12290/12287/19699
GO:0090148	BP	GO:0090148	membrane fission	25	0.538501	1.77005	0.00581355	0.0300681	0.0206033	3325	tags=76%, list=38%, signal=47%	20404/330401/75914/102058/116733/105513/237781/234852/68953/53413/67064/13854/105504/211446/76959/67453/74006/69940/50850
GO:0019722	BP	GO:0019722	calcium-mediated signaling	71	0.354828	1.49411	0.00581595	0.0300681	0.0206033	1702	tags=34%, list=20%, signal=27%	16728/53901/668940/14226/17762/18013/18212/14816/109676/19122/110891/53902/238276/30937/20191/80795/56637/23964/11820/19055/12289/20541/17967/12484
GO:0002313	BP	GO:0002313	mature B cell differentiation involved in immune response	12	-0.758318	-1.7471	0.00583485	0.0301347	0.0206489	1029	tags=58%, list=12%, signal=52%	11486/16852/210293/16848/18129/16431/13388
GO:0035137	BP	GO:0035137	hindlimb morphogenesis	16	-0.697243	-1.70528	0.00585642	0.0302193	0.0207069	754	tags=44%, list=9%, signal=40%	12166/12387/19206/58198/11695/18128/14734
GO:0002200	BP	GO:0002200	somatic diversification of immune receptors	48	-0.55162	-1.6619	0.00592003	0.0304937	0.0208949	1590	tags=44%, list=18%, signal=36%	17686/321006/66362/17685/15510/71890/14056/14375/58208/15289/17350/70238/55982/27354/17688/11920/51869/237877/77782/22256/26909
GO:0007141	BP	GO:0007141	male meiosis I	13	-0.749621	-1.75487	0.00596631	0.0306779	0.0210211	1282	tags=54%, list=15%, signal=46%	15512/69260/114714/12190/69716/17864/19361
GO:0045444	BP	GO:0045444	fat cell differentiation	125	-0.457301	-1.54191	0.0059629	0.0306779	0.0210211	1138	tags=22%, list=13%, signal=20%	228790/13592/107503/100604/11861/22339/72007/20377/100201/20602/13654/20528/56458/12193/18712/81703/16449/20787/12608/21416/20681/17127/16956/20319/12443/14560/15205/12192
GO:0006220	BP	GO:0006220	pyrimidine nucleotide metabolic process	28	-0.633966	-1.7323	0.00602581	0.0309566	0.0212121	1736	tags=50%, list=20%, signal=40%	18103/56749/80914/13178/56520/51797/21915/69719/66422/22247/110074/22171/320685/20425
GO:0030003	BP	GO:0030003	intracellular monoatomic cation homeostasis	219	0.263445	1.36656	0.00603989	0.0310016	0.0212429	2338	tags=39%, list=27%, signal=29%	68312/14812/269615/18799/668940/14226/12721/64051/66168/232975/108058/18795/12176/238871/94249/170770/74772/109676/18751/78506/12288/19165/11975/14806/19122/110891/12298/235380/14810/65113/20191/72828/65945/20536/12652/52898/100126824/80795/236794/54411/11984/20617/64176/12801/12313/11972/59033/72825/14299/11820/11966/170731/17357/11933/14385/18750/20541/111173/13198/12286/11927/107771/22041/1231…
GO:0033273	BP	GO:0033273	response to vitamin	12	-0.756511	-1.74294	0.00606144	0.0310576	0.0212813	1029	tags=42%, list=12%, signal=37%	11486/69305/18712/14456/20181
GO:0045814	BP	GO:0045814	negative regulation of gene expression, epigenetic	87	-0.478875	-1.53945	0.00608251	0.0311226	0.0213258	1949	tags=37%, list=22%, signal=29%	12417/13018/223828/13435/19720/21849/433759/73139/20466/74355/109113/59001/13626/232187/331623/666704/14056/52615/15289/20937/217578/16906/16907/51869/13433/12577/107435/218973/15201/11810/12566/18140
GO:1901607	BP	GO:1901607	alpha-amino acid biosynthetic process	37	-0.592983	-1.7282	0.00609112	0.0311277	0.0213293	1595	tags=43%, list=18%, signal=35%	210009/26432/69051/109079/108037/209027/107272/27053/100678/69719/108156/107869/66902/13361/236539/20425
GO:0006687	BP	GO:0006687	glycosphingolipid metabolic process	26	0.520005	1.74599	0.00610807	0.031131	0.0213316	1592	tags=46%, list=18%, signal=38%	14421/20450/26878/20448/26877/18010/11305/230101/20451/19156/20447/14348
GO:0003151	BP	GO:0003151	outflow tract morphogenesis	38	-0.567601	-1.65356	0.00609898	0.031131	0.0213316	1214	tags=34%, list=14%, signal=30%	12387/18186/17260/15213/22339/67784/14362/21380/16449/18128/13717/20319/15205
GO:1903039	BP	GO:1903039	positive regulation of leukocyte cell-cell adhesion	86	-0.475569	-1.52639	0.00610343	0.031131	0.0213316	1107	tags=26%, list=13%, signal=23%	18950/16002/17242/11486/15289/72057/11534/16852/20443/14082/12400/66993/12144/11987/12010/15117/17311/12505/23871/14634/18761/15205
GO:0010959	BP	GO:0010959	regulation of metal ion transport	195	0.27772	1.35999	0.0061131	0.031131	0.0213316	1068	tags=27%, list=12%, signal=24%	241528/68312/12295/319984/14226/12721/14419/108058/100503659/16485/18795/238871/100102/20315/14166/109305/432442/22318/16502/109676/14681/12361/11735/279561/57440/12288/13483/19165/69106/19122/238276/12298/269513/14697/14168/12293/12287/12297/14810/67149/20191/12805/72828/16170/19062/12913/30948/83814/66109/75607/58237/14360/14682
GO:0031115	BP	GO:0031115	negative regulation of microtubule polymerization	11	0.695668	1.80514	0.00612026	0.0311402	0.0213379	1611	tags=64%, list=19%, signal=52%	20257/22153/72205/17756/76686/20617/54126
GO:0046427	BP	GO:0046427	positive regulation of receptor signaling pathway via JAK-STAT	12	-0.755833	-1.74138	0.00617473	0.0312931	0.0214427	823	tags=42%, list=9%, signal=38%	219103/11677/15208/18128/15205
GO:0009168	BP	GO:0009168	purine ribonucleoside monophosphate biosynthetic process	17	-0.679821	-1.69291	0.0061762	0.0312931	0.0214427	1424	tags=65%, list=16%, signal=54%	11564/14450/15452/18950/11486/11534/237823/23918/67054/231327/110639
GO:0060070	BP	GO:0060070	canonical Wnt signaling pathway	172	-0.421698	-1.45791	0.00617711	0.0312931	0.0214427	1335	tags=23%, list=15%, signal=20%	207181/14160/71890/56505/29806/12387/13653/27041/17242/16973/64297/70300/260305/230899/20438/68010/20377/328949/100201/20682/14362/70433/20969/56458/67916/68151/269424/26564/27412/20674/21416/107351/17127/18128/14632/20319/14634/22417/14734/12316
GO:0014855	BP	GO:0014855	striated muscle cell proliferation	45	-0.559418	-1.66392	0.00624156	0.0315921	0.0216476	457	tags=20%, list=5%, signal=19%	18712/11600/20181/18128/14632/19662/268697/12534/14609
GO:0003170	BP	GO:0003170	heart valve development	23	-0.653645	-1.71709	0.00633825	0.0319155	0.0218691	1027	tags=39%, list=12%, signal=35%	17260/15213/20682/18129/16449/116701/18128/13717/16007
GO:0072527	BP	GO:0072527	pyrimidine-containing compound metabolic process	37	-0.590342	-1.7205	0.00637889	0.0320648	0.0219714	1736	tags=41%, list=20%, signal=33%	18103/56749/80914/13178/56520/51797/21915/69719/66422/22247/110074/22171/320685/20425/21877
GO:0060563	BP	GO:0060563	neuroepithelial cell differentiation	23	-0.651918	-1.71255	0.00654107	0.0327953	0.022472	342	tags=30%, list=4%, signal=29%	234740/16449/13388/12608/18128/22417/15205
GO:0003279	BP	GO:0003279	cardiac septum development	64	-0.511679	-1.58877	0.00657829	0.0329536	0.0225805	1166	tags=28%, list=13%, signal=25%	22059/18186/108154/15213/229700/70300/67784/26920/58198/14362/21380/18129/16449/116701/18128/12767/16007/15205
GO:0086005	BP	GO:0086005	ventricular cardiac muscle cell action potential	12	0.669116	1.78872	0.00660195	0.0330437	0.0226423	1406	tags=58%, list=16%, signal=49%	16480/109676/12288/20191/30948/83814/235281
GO:0002521	BP	GO:0002521	leukocyte differentiation	266	-0.397314	-1.40337	0.00662579	0.0331346	0.0227045	1417	tags=24%, list=16%, signal=21%	19766/18996/17685/21847/14357/20535/12018/17387/12387/13653/22059/18950/14056/59009/14375/58208/17242/11486/17260/15289/52683/72057/12398/16852/14082/12571/22339/98386/20377/12400/100201/210293/11920/14815/320910/66993/69656/18081/103743/12144/17869/102545/23882/12193/16848/12010/18129/16431/26564/17311/21873/13388/14456/12608/12578/15201/14087/12505/17863/15064/14634/211651/22417/14734/12192
GO:0046128	BP	GO:0046128	purine ribonucleoside metabolic process	13	-0.747178	-1.74915	0.00664815	0.0331896	0.0227422	1173	tags=54%, list=13%, signal=47%	15452/18950/11486/57295/11534/269378/66902
GO:0060123	BP	GO:0060123	regulation of growth hormone secretion	12	0.668656	1.7875	0.0067093	0.0334344	0.0229099	1910	tags=58%, list=22%, signal=46%	16443/54393/545156/228355/76055/54126/320790
GO:0045446	BP	GO:0045446	endothelial cell differentiation	60	-0.519472	-1.59777	0.00671438	0.0334344	0.0229099	1214	tags=30%, list=14%, signal=26%	12387/216527/20672/15213/22350/29876/21872/22339/14314/14362/17698/622434/16449/21873/13388/18128/12767/12822
GO:0040036	BP	GO:0040036	regulation of fibroblast growth factor receptor signaling pathway	16	-0.690954	-1.6899	0.00673212	0.0334942	0.0229509	1320	tags=56%, list=15%, signal=48%	18053/12387/219134/70300/14733/116701/21416/22417/15245
GO:0000712	BP	GO:0000712	resolution of meiotic recombination intermediates	11	-0.754142	-1.7113	0.00683484	0.0339473	0.0232614	431	tags=55%, list=5%, signal=52%	104806/17350/69928/268465/234396/21973
GO:0002065	BP	GO:0002065	columnar/cuboidal epithelial cell differentiation	60	-0.518279	-1.5941	0.00689224	0.0342033	0.0234368	851	tags=22%, list=10%, signal=20%	234740/94192/12571/20682/21380/16449/13388/12608/20181/18128/22417/15205/14609
GO:0033555	BP	GO:0033555	multicellular organismal response to stress	45	0.421346	1.58358	0.00696844	0.0344935	0.0236356	880	tags=33%, list=10%, signal=30%	20269/14812/19713/11419/18013/73242/58234/56710/14806/12290/60597/72194/12287/13844/19699
GO:0071867	BP	GO:0071867	response to monoamine	30	0.490645	1.69326	0.00708432	0.0348895	0.023907	1404	tags=40%, list=16%, signal=34%	11803/238871/224129/18196/14681/14697/20191/18197/14682/14687/11820/18483
GO:0071868	BP	GO:0071868	cellular response to monoamine stimulus	30	0.490645	1.69326	0.00708432	0.0348895	0.023907	1404	tags=40%, list=16%, signal=34%	11803/238871/224129/18196/14681/14697/20191/18197/14682/14687/11820/18483
GO:0071869	BP	GO:0071869	response to catecholamine	30	0.490645	1.69326	0.00708432	0.0348895	0.023907	1404	tags=40%, list=16%, signal=34%	11803/238871/224129/18196/14681/14697/20191/18197/14682/14687/11820/18483
GO:0071870	BP	GO:0071870	cellular response to catecholamine stimulus	30	0.490645	1.69326	0.00708432	0.0348895	0.023907	1404	tags=40%, list=16%, signal=34%	11803/238871/224129/18196/14681/14697/20191/18197/14682/14687/11820/18483
GO:0021536	BP	GO:0021536	diencephalon development	35	-0.586935	-1.69213	0.00705944	0.0348895	0.023907	1390	tags=40%, list=16%, signal=34%	18996/18992/20349/12387/18186/15114/230025/50913/20674/21416/14633/14632/22417/15205
GO:0051894	BP	GO:0051894	positive regulation of focal adhesion assembly	16	-0.688879	-1.68483	0.00706051	0.0348895	0.023907	1589	tags=56%, list=18%, signal=46%	11350/226352/29875/110829/17886/18186/22339/17127/22417
GO:0055080	BP	GO:0055080	monoatomic cation homeostasis	257	0.248231	1.30363	0.00716969	0.0352208	0.024134	2031	tags=32%, list=23%, signal=26%	68312/14812/269615/18799/668940/14226/12721/64051/278279/66168/232975/108058/16485/18795/56506/12176/238871/94249/170770/211401/74772/109676/18751/11735/78506/12288/19165/11975/14806/19122/110891/12298/83704/235380/14810/65113/20191/72828/65945/20536/12652/52898/59049/100126824/80795/236794/54411/11984/20617/64176/12801/12313/11972/59033/72825/14299/11820/11966/170731/17357/11933/14385/71982/1875…
GO:0010884	BP	GO:0010884	positive regulation of lipid storage	12	-0.749773	-1.72742	0.00719439	0.0353124	0.0241968	283	tags=25%, list=3%, signal=24%	68680/20778/16956
GO:0046339	BP	GO:0046339	diacylglycerol metabolic process	13	0.65213	1.77238	0.00720427	0.0353312	0.0242097	2525	tags=77%, list=29%, signal=55%	13139/67800/56077/16890/19012/231871/380921/13350/227333/104418
GO:0010631	BP	GO:0010631	epithelial cell migration	147	-0.432454	-1.47869	0.00723025	0.0353694	0.0242359	1052	tags=21%, list=12%, signal=19%	16002/17260/15289/55982/22339/67784/328949/14314/18024/54357/16367/68328/232227/80837/20682/15368/18760/11600/67916/107831/15117/17311/330662/70097/20778/107351/18128/23871/12767/68743/12822
GO:0090130	BP	GO:0090130	tissue migration	147	-0.432454	-1.47869	0.00723025	0.0353694	0.0242359	1052	tags=21%, list=12%, signal=19%	16002/17260/15289/55982/22339/67784/328949/14314/18024/54357/16367/68328/232227/80837/20682/15368/18760/11600/67916/107831/15117/17311/330662/70097/20778/107351/18128/23871/12767/68743/12822
GO:0090132	BP	GO:0090132	epithelium migration	147	-0.432454	-1.47869	0.00723025	0.0353694	0.0242359	1052	tags=21%, list=12%, signal=19%	16002/17260/15289/55982/22339/67784/328949/14314/18024/54357/16367/68328/232227/80837/20682/15368/18760/11600/67916/107831/15117/17311/330662/70097/20778/107351/18128/23871/12767/68743/12822
GO:0030500	BP	GO:0030500	regulation of bone mineralization	28	-0.629823	-1.72097	0.00724108	0.0353927	0.0242518	1090	tags=39%, list=13%, signal=34%	106522/17260/20937/20682/18214/110789/20181/17127/16007/22417/14609
GO:0048599	BP	GO:0048599	oocyte development	32	-0.596839	-1.68632	0.00728712	0.0355633	0.0243687	724	tags=25%, list=8%, signal=23%	11920/12190/12531/69716/20878/67141/268697/22417
GO:0038179	BP	GO:0038179	neurotrophin signaling pathway	33	0.468354	1.62866	0.00730036	0.0355633	0.0243687	1533	tags=36%, list=18%, signal=30%	12721/76884/77480/225849/81907/74747/17984/319740/20779/236794/320150/20661
GO:0072384	BP	GO:0072384	organelle transport along microtubule	69	0.36437	1.48432	0.0073833	0.0359374	0.0246251	2510	tags=55%, list=29%, signal=39%	12794/18039/16572/17760/17762/18762/17756/17755/22142/22223/360213/16561/72368/67774/16560/228355/232946/16553/75665/71923/64933/68196/11777/13424/67269/12121/54161/71435/11776/17281/83767/20615/73689/70827/67095/11775/18472/56444
GO:0031347	BP	GO:0031347	regulation of defense response	240	-0.398173	-1.40132	0.00745116	0.0362073	0.02481	1713	tags=27%, list=20%, signal=22%	85305/13205/22031/14182/216190/12261/19261/20466/63953/242864/503610/23825/67917/19376/67070/11545/20085/19766/353187/15510/11692/11669/73945/14375/16002/17242/11486/17260/15289/244329/76438/64297/16852/14082/17089/230899/20361/22038/11920/18024/54725/18081/213211/67486/72565/18854/78781/56312/100182/20787/12608/225471/14087/12505/17127/97165/214763/54598/23871/16956/211651/52033/77777/14609
GO:0060976	BP	GO:0060976	coronary vasculature development	35	-0.585162	-1.68701	0.00763571	0.0370556	0.0253912	1214	tags=37%, list=14%, signal=32%	12387/18186/108154/70300/22340/22339/67784/26920/11600/21380/20181/18128/14734
GO:0030858	BP	GO:0030858	positive regulation of epithelial cell differentiation	20	-0.654028	-1.67766	0.00763843	0.0370556	0.0253912	1214	tags=40%, list=14%, signal=34%	12387/19207/19206/19126/20682/20674/11921/18128
GO:0008277	BP	GO:0008277	regulation of G protein-coupled receptor signaling pathway	60	0.388321	1.54862	0.00764985	0.0370802	0.0254081	1651	tags=38%, list=19%, signal=31%	21367/11803/383348/22141/18795/238871/20977/109689/70461/74270/14761/101489/12652/66082/50876/20617/17237/11820/170822/13429/26431/12323/12121
GO:0048665	BP	GO:0048665	neuron fate specification	23	-0.64742	-1.70073	0.00765658	0.037082	0.0254094	1515	tags=52%, list=17%, signal=43%	16911/18996/18992/15376/20682/20664/18213/21380/13388/11921/14633/14634
GO:0048592	BP	GO:0048592	eye morphogenesis	84	-0.490166	-1.56592	0.00767514	0.0371411	0.0254498	1293	tags=30%, list=15%, signal=26%	12018/20683/236266/12387/269831/54352/14107/22339/19126/58235/20682/20664/18129/16449/13388/20674/12677/20681/270120/18128/19662/12832/14634/14451/18742
GO:0043268	BP	GO:0043268	positive regulation of potassium ion transport	28	0.51467	1.75226	0.00769838	0.0371611	0.0254635	553	tags=29%, list=6%, signal=27%	241528/14419/16485/432442/16502/109676/279561/13483
GO:0045600	BP	GO:0045600	positive regulation of fat cell differentiation	27	-0.630823	-1.71625	0.00769509	0.0371611	0.0254635	782	tags=30%, list=9%, signal=27%	72007/20377/100201/18712/12608/16956/20319/12192
GO:0045445	BP	GO:0045445	myoblast differentiation	63	-0.509843	-1.57847	0.00769262	0.0371611	0.0254635	1027	tags=24%, list=12%, signal=21%	17260/72057/16852/66993/20682/20969/117606/171170/13388/19712/21416/20681/18128/17927/12192
GO:2000134	BP	GO:2000134	negative regulation of G1/S transition of mitotic cell cycle	45	-0.554385	-1.64895	0.00772101	0.0371781	0.0254752	1166	tags=40%, list=13%, signal=35%	26992/67941/52468/12043/22059/14056/56190/57913/69274/18854/227292/12575/269424/19891/19650/14841/52679/12443
GO:0032147	BP	GO:0032147	activation of protein kinase activity	45	-0.553558	-1.64649	0.00772101	0.0371781	0.0254752	792	tags=22%, list=9%, signal=20%	22339/71943/18213/11600/77744/14456/13605/269582/72119/381293
GO:0030183	BP	GO:0030183	B cell differentiation	65	-0.50965	-1.58819	0.00778675	0.0374328	0.0256498	1643	tags=35%, list=19%, signal=29%	268564/11350/321006/12043/17685/12018/17387/22059/18950/14056/11486/16852/20377/210293/11920/102545/12193/16848/18129/16431/13388/17863/12192
GO:0032410	BP	GO:0032410	negative regulation of transporter activity	47	0.404795	1.5355	0.00778118	0.0374328	0.0256498	1543	tags=36%, list=18%, signal=30%	68312/14226/108058/100503659/100102/11735/69106/14697/12297/65113/13844/83814/20617/12313/80281/19055/18750
GO:0009130	BP	GO:0009130	pyrimidine nucleoside monophosphate biosynthetic process	10	-0.773124	-1.70618	0.00781993	0.0375614	0.0257379	1736	tags=80%, list=20%, signal=64%	18103/56749/80914/69719/22247/110074/22171/20425
GO:0046622	BP	GO:0046622	positive regulation of organ growth	30	-0.607824	-1.68811	0.00787972	0.0378175	0.0259133	1069	tags=37%, list=12%, signal=32%	11546/16002/17260/56449/106628/14815/18712/18128/14632/268697/12534
GO:0030850	BP	GO:0030850	prostate gland development	17	-0.674571	-1.67984	0.00789475	0.0378585	0.0259414	755	tags=41%, list=9%, signal=38%	12387/20377/20682/14633/20181/12505/18128
GO:0031571	BP	GO:0031571	mitotic G1 DNA damage checkpoint signaling	18	-0.666879	-1.67409	0.00793347	0.0380129	0.0260472	1166	tags=39%, list=13%, signal=34%	22059/56190/57913/18854/12575/19891/12443
GO:0046717	BP	GO:0046717	acid secretion	12	0.66088	1.76671	0.00799746	0.0382881	0.0262358	684	tags=58%, list=8%, signal=54%	64051/56018/319924/18479/268860/12298/54393
GO:0002821	BP	GO:0002821	positive regulation of adaptive immune response	43	-0.552597	-1.64328	0.00823449	0.0393583	0.0269691	1407	tags=40%, list=16%, signal=33%	66362/17319/17685/15510/71890/18950/11486/17350/55982/14082/51869/237877/12010/12505/15064/77777/18761
GO:0032965	BP	GO:0032965	regulation of collagen biosynthetic process	18	-0.665236	-1.66997	0.00825294	0.0394142	0.0270074	513	tags=28%, list=6%, signal=26%	18214/14268/17863/18128/22417
GO:0008299	BP	GO:0008299	isoprenoid biosynthetic process	17	0.594666	1.72155	0.00832994	0.0397169	0.0272149	1750	tags=59%, list=20%, signal=47%	192156/208715/16987/14137/68603/15357/110196/17855/319554/71365
GO:0051438	BP	GO:0051438	regulation of ubiquitin-protein transferase activity	41	-0.571071	-1.6846	0.00832884	0.0397169	0.0272149	371	tags=37%, list=4%, signal=35%	56371/11350/16898/71890/12237/213539/77891/67121/56150/327799/12578/107995/67141/18817/12236
GO:0051494	BP	GO:0051494	negative regulation of cytoskeleton organization	110	0.31314	1.44327	0.00848306	0.040414	0.0276925	1301	tags=35%, list=15%, signal=30%	23805/20257/12721/67254/22153/69697/72205/17756/17755/99512/56320/260315/243961/12386/234695/58234/100034363/11789/19241/17754/666244/76686/68732/14168/11519/19240/208158/76499/18645/19062/18708/20740/50876/20617/18693/20742/14026/102774
GO:0002091	BP	GO:0002091	negative regulation of receptor internalization	11	0.683169	1.77271	0.00852646	0.0405215	0.0277662	1923	tags=82%, list=22%, signal=64%	107065/100102/13385/53378/16976/68420/268445/54609/75659
GO:0042755	BP	GO:0042755	eating behavior	11	0.682037	1.76977	0.00852646	0.0405215	0.0277662	402	tags=36%, list=5%, signal=35%	50769/21367/73094/22223
GO:1901387	BP	GO:1901387	positive regulation of voltage-gated calcium channel activity	11	0.681278	1.7678	0.00852646	0.0405215	0.0277662	1414	tags=64%, list=16%, signal=53%	57440/238276/12298/12293/12297/237611/19055
GO:0046879	BP	GO:0046879	hormone secretion	177	0.273081	1.34704	0.00857757	0.0407313	0.0279099	1679	tags=37%, list=19%, signal=30%	14427/14226/19339/18012/17932/14419/75605/19275/16443/18795/207227/224129/109689/16522/109305/26875/18642/22318/75770/268860/18751/93691/14681/12361/68267/216856/12288/20394/68039/58994/19276/12290/14761/18575/54393/20666/18111/12889/545156/276952/16971/12876/15357/12652/14682/228355/14687/12801/18693/20614/18508/20677/54003/170731/19055/71764/78894/12953/12289/76055/54126/23830/13649/60510/277978
GO:0048278	BP	GO:0048278	vesicle docking	47	0.401082	1.52141	0.00864044	0.0409964	0.0280916	1657	tags=40%, list=19%, signal=33%	19339/234593/20979/116837/56216/53331/22318/14681/20910/67295/76787/19340/75914/22249/102058/382018/67808/64143/17967
GO:0048566	BP	GO:0048566	embryonic digestive tract development	12	-0.745006	-1.71643	0.00866723	0.0410901	0.0281558	1090	tags=58%, list=13%, signal=51%	106522/11486/58198/21416/14633/17863/14634
GO:0006401	BP	GO:0006401	RNA catabolic process	180	-0.414277	-1.43693	0.00881426	0.0416749	0.0285565	2962	tags=54%, list=34%, signal=37%	268420/217980/233908/433702/338359/231464/74133/236732/75553/225929/19826/214627/66094/11792/234594/228994/13211/15381/50912/213550/68134/60365/70439/22030/74326/19877/66441/67493/53422/14852/76014/20823/22352/15384/56403/70640/73158/71701/13555/110809/230908/192170/28114/14265/22608/21379/17149/19878/72662/50783/67724/14359/51810/15473/210106/69902/19819/78893/239528/66583/230753/11991/52830/140…
GO:0032101	BP	GO:0032101	regulation of response to external stimulus	360	-0.368896	-1.31231	0.00881378	0.0416749	0.0285565	1064	tags=26%, list=12%, signal=24%	85305/13205/22031/14182/216190/12261/19261/76893/20466/63953/242864/503610/23825/67917/18007/106014/19376/12043/67070/11545/20085/19766/353187/17319/15510/20349/20909/83964/11692/11669/73945/18186/14375/16002/17242/11486/15289/15376/244329/76438/14804/242443/65079/64297/16852/20443/14082/17089/22340/230899/20361/22339/22038/11920/18024/54725/18081/213211/67486/72565/208177/18854/18213/14268/78781…
GO:1904667	BP	GO:1904667	negative regulation of ubiquitin protein ligase activity	10	-0.770826	-1.70111	0.00887825	0.0419203	0.0287246	278	tags=60%, list=3%, signal=58%	71890/213539/56150/327799/12578/67141
GO:0099637	BP	GO:0099637	neurotransmitter receptor transport	23	0.54236	1.71257	0.00891335	0.0420199	0.0287929	1403	tags=48%, list=16%, signal=40%	26414/56216/18196/22318/238276/81905/12889/216831/65945/20614/54377
GO:0035020	BP	GO:0035020	regulation of Rac protein signal transduction	16	0.597576	1.7035	0.00891375	0.0420199	0.0287929	2214	tags=69%, list=25%, signal=51%	108058/20262/216831/68585/56486/260299/100310872/319974/211255/108155/13430
GO:0072577	BP	GO:0072577	endothelial cell apoptotic process	20	-0.646283	-1.6578	0.00897129	0.0421645	0.028892	713	tags=30%, list=8%, signal=28%	18024/57875/54409/11600/14456/12822
GO:0098727	BP	GO:0098727	maintenance of cell number	140	-0.431113	-1.47116	0.00897333	0.0421645	0.028892	1378	tags=24%, list=16%, signal=20%	69790/21847/226026/72515/20843/14088/69260/60406/14056/30877/244329/16973/72057/245688/20377/51869/17869/20682/58198/140486/56458/12193/233064/13388/20674/171167/19712/21416/12578/15208/211651/12316/15205
GO:0045661	BP	GO:0045661	regulation of myoblast differentiation	42	-0.559092	-1.65644	0.0089869	0.0421943	0.0289124	1027	tags=26%, list=12%, signal=23%	17260/72057/66993/20682/117606/171170/13388/20681/18128/17927/12192
GO:0098876	BP	GO:0098876	vesicle-mediated transport to the plasma membrane	113	0.297641	1.39052	0.00900811	0.0422599	0.0289574	2953	tags=53%, list=34%, signal=36%	234593/27008/26414/11981/56216/18196/22318/11735/57440/238276/12889/216831/99696/75914/65945/268451/68299/54411/16553/54189/20614/20742/68767/102058/71517/71648/329260/213760/100502841/228359/269338/69150/56433/68365/67826/101490/19349/13430/68505/53869/19325/19326/106572/12988/13185/73288/65114/105504/100226/224705/209131/15239/54645/74105/104831/20955/227648/56350/77407/245886
GO:0045639	BP	GO:0045639	positive regulation of myeloid cell differentiation	42	-0.55896	-1.65605	0.009081	0.0425677	0.0291682	1417	tags=36%, list=16%, signal=30%	19766/18996/21847/15289/67017/14082/100201/18081/18129/16449/26564/17311/97165/23871/12192
GO:0002694	BP	GO:0002694	regulation of leukocyte activation	217	-0.394622	-1.38072	0.00913931	0.0427929	0.0293226	1364	tags=24%, list=16%, signal=21%	17319/17685/14357/20535/15510/71890/20909/17387/12387/18950/59009/14375/16002/17242/11486/17260/15289/17350/72057/11534/55982/16852/14082/230899/20377/12400/22038/11920/51869/66993/12144/11987/15368/12575/14268/12193/237877/12010/17311/14456/12608/225471/12578/14087/12505/214763/109594/14634/211651/77777/18761/15205/12192
GO:0002562	BP	GO:0002562	somatic diversification of immune receptors via germline recombination within a single locus	43	-0.549445	-1.63391	0.00916493	0.0428235	0.0293435	1590	tags=47%, list=18%, signal=38%	17686/321006/66362/17685/15510/71890/14056/14375/58208/15289/17350/70238/55982/27354/17688/11920/51869/237877/22256/26909
GO:0016444	BP	GO:0016444	somatic cell DNA recombination	43	-0.549445	-1.63391	0.00916493	0.0428235	0.0293435	1590	tags=47%, list=18%, signal=38%	17686/321006/66362/17685/15510/71890/14056/14375/58208/15289/17350/70238/55982/27354/17688/11920/51869/237877/22256/26909
GO:0001892	BP	GO:0001892	embryonic placenta development	51	-0.530042	-1.60771	0.0091913	0.0429123	0.0294044	1080	tags=25%, list=12%, signal=22%	20733/16002/15213/12705/12577/13875/20873/12608/52679/16007/15205/108961/12192
GO:0035107	BP	GO:0035107	appendage morphogenesis	84	-0.486285	-1.55352	0.00922127	0.0429835	0.0294532	1090	tags=23%, list=13%, signal=20%	106522/234740/16973/18541/70300/19206/20682/58198/66910/11695/18129/26564/14633/18128/20319/14634/14451/14734/14609
GO:0035108	BP	GO:0035108	limb morphogenesis	84	-0.486285	-1.55352	0.00922127	0.0429835	0.0294532	1090	tags=23%, list=13%, signal=20%	106522/234740/16973/18541/70300/19206/20682/58198/66910/11695/18129/26564/14633/18128/20319/14634/14451/14734/14609
GO:0001938	BP	GO:0001938	positive regulation of endothelial cell proliferation	39	-0.566981	-1.65381	0.00923274	0.0430026	0.0294663	1052	tags=31%, list=12%, signal=27%	20683/16002/17242/15289/22340/22339/15368/18760/353156/97165/12822/18654
GO:0045668	BP	GO:0045668	negative regulation of osteoblast differentiation	30	-0.602709	-1.6739	0.00926733	0.0430949	0.0295295	827	tags=40%, list=10%, signal=36%	12571/72007/68010/20377/19206/100201/12705/20682/20674/17127/18128/14560
GO:0002252	BP	GO:0002252	immune effector process	181	-0.417801	-1.44939	0.00930166	0.0432201	0.0296153	1419	tags=28%, list=16%, signal=24%	20085/66362/56722/17319/17685/15510/71890/20909/11692/15452/22059/18950/16002/17242/11486/15289/17350/70238/76438/55982/64297/16852/14082/230899/20361/27354/210293/17688/51869/18477/54725/103743/15368/23882/237877/11600/16848/12010/18129/16431/16449/13388/12608/225471/22256/214763/17863/15064/19662/26909/77777
GO:0055117	BP	GO:0055117	regulation of cardiac muscle contraction	34	0.457284	1.60183	0.00933867	0.0433092	0.0296764	1213	tags=38%, list=14%, signal=33%	668940/14226/16480/238871/109676/57440/12288/17131/14168/20191/12652/30948/12313
GO:0006623	BP	GO:0006623	protein targeting to vacuole	34	0.457145	1.60135	0.00933867	0.0433092	0.0296764	2812	tags=65%, list=32%, signal=44%	194309/75788/68299/72825/12492/218035/116733/20661/209018/74718/320528/11776/100504663/218699/19349/270096/70297/230895/107305/15239/52348/20955
GO:0006399	BP	GO:0006399	tRNA metabolic process	137	-0.420759	-1.4302	0.00935052	0.0433092	0.0296764	3029	tags=53%, list=35%, signal=35%	71984/72085/66161/227522/68730/74753/212679/66926/67674/212528/71807/78890/104721/72167/14911/50912/67106/240174/74467/69961/98956/71916/66078/15547/20823/234734/107271/381314/98985/66246/68916/107508/67417/52575/353172/328162/56361/28114/107045/72133/70120/69684/70223/67724/66757/66192/211064/85305/110960/66628/78697/381802/68736/69185/105148/66362/54364/106248/226539/226414/27267/108943/78651/6…
GO:0015849	BP	GO:0015849	organic acid transport	118	0.301413	1.40164	0.00934898	0.0433092	0.0296764	1573	tags=34%, list=18%, signal=28%	11847/14812/12904/64051/56018/319924/18212/18479/14816/18037/21366/268860/20910/68267/68039/215113/140919/12298/54393/94280/214663/26569/14077/26420/13358/12934/229517/20617/27416/243328/216739/65106/19156/26457/268706/208638/72961/241296/72055/12903
GO:0044848	BP	GO:0044848	biological phase	22	-0.637036	-1.66599	0.00941906	0.0435921	0.0298702	1214	tags=45%, list=14%, signal=39%	12387/21749/17350/12571/110052/14841/50883/18128/107995/22137
GO:0009161	BP	GO:0009161	ribonucleoside monophosphate metabolic process	30	-0.601276	-1.66992	0.00966379	0.0445861	0.0305513	1627	tags=57%, list=19%, signal=46%	56749/80914/11564/14450/15452/11637/18950/11486/19139/11534/237823/23918/67054/69719/22247/231327/110639
GO:0060669	BP	GO:0060669	embryonic placenta morphogenesis	14	-0.710474	-1.68351	0.00977044	0.0450042	0.0308378	1080	tags=43%, list=12%, signal=38%	20733/16002/12577/13875/16007/12192
GO:0035886	BP	GO:0035886	vascular associated smooth muscle cell differentiation	19	-0.673979	-1.71782	0.00978331	0.0450279	0.0308541	792	tags=37%, list=9%, signal=34%	12387/22339/13433/107869/54409/18128/15205
GO:0032633	BP	GO:0032633	interleukin-4 production	11	-0.742555	-1.685	0.00982143	0.0451322	0.0309255	377	tags=45%, list=4%, signal=44%	18129/20539/12608/18128/18761
GO:0045880	BP	GO:0045880	positive regulation of smoothened signaling pathway	25	-0.63562	-1.69232	0.00992819	0.0455583	0.0312175	988	tags=48%, list=11%, signal=43%	56207/56427/19376/15376/20377/269941/104732/67009/59056/14632/14451/14734
GO:0061614	BP	GO:0061614	miRNA transcription	42	-0.556398	-1.64845	0.00992978	0.0455583	0.0312175	1320	tags=36%, list=15%, signal=30%	12166/18021/18053/13653/22059/30877/14815/17869/20682/20602/20787/19712/17127/17863/23871
GO:0045687	BP	GO:0045687	positive regulation of glial cell differentiation	21	-0.645037	-1.67548	0.00995543	0.0456401	0.0312736	560	tags=29%, list=6%, signal=27%	17242/50913/13654/18128/12767/15205
GO:0000722	BP	GO:0000722	telomere maintenance via recombination	12	-0.737861	-1.69997	0.0100268	0.0458951	0.0314483	1286	tags=67%, list=15%, signal=57%	226026/67241/22594/19360/114714/74335/12190/19361
GO:0006903	BP	GO:0006903	vesicle targeting	45	0.412052	1.54865	0.0100579	0.0460013	0.031521	3676	tags=78%, list=42%, signal=45%	26875/75914/76499/192167/66251/60409/102058/67581/27096/76707/66994/76510/53413/78232/76205/211556/59045/66397/59005/56418/26412/56398/105504/211446/66226/67511/227648/67898/69940/18570/19164/245828/216131/75964/240756
GO:0008652	BP	GO:0008652	amino acid biosynthetic process	39	-0.561955	-1.63915	0.0100957	0.0461382	0.0316149	1595	tags=41%, list=18%, signal=34%	210009/26432/69051/109079/108037/209027/107272/27053/100678/69719/108156/107869/66902/13361/236539/20425
GO:0097190	BP	GO:0097190	apoptotic signaling pathway	355	-0.375644	-1.33629	0.0101595	0.0463934	0.0317897	1417	tags=23%, list=16%, signal=20%	19766/16438/18996/14297/17319/17685/69660/14629/18053/12018/66073/20747/20909/12387/19367/11669/69260/18432/74682/22059/18186/217558/18950/59009/26885/68539/51800/11546/56449/83925/17350/14082/170755/57913/20438/17193/66262/22339/27354/20377/22038/170799/17688/11920/18024/14051/11749/75736/72565/14678/30954/18854/17869/11910/107869/15368/12575/245527/21987/237877/12190/74041/242705/69065/56312/60…
GO:0045778	BP	GO:0045778	positive regulation of ossification	23	-0.63554	-1.66953	0.0101918	0.0464684	0.0318411	351	tags=30%, list=4%, signal=29%	106522/17260/110789/20181/17127/16007/22417
GO:0007167	BP	GO:0007167	enzyme-linked receptor protein signaling pathway	454	-0.356589	-1.28228	0.0102379	0.046642	0.03196	1250	tags=20%, list=14%, signal=18%	399558/20660/329506/12387/13653/69260/60406/13644/22059/58184/18186/17975/56338/74360/16002/19716/15114/108900/219134/228839/83925/217692/14176/98415/70300/18226/70568/245688/22340/230899/104215/170676/22339/69178/16332/68010/20377/65112/71943/14314/54601/320910/16367/54725/12705/12577/21815/14678/18854/12445/20682/14733/14362/20528/18213/18214/56458/18760/11600/13842/12830/18129/26564/116701/207…
GO:0048846	BP	GO:0048846	axon extension involved in axon guidance	20	0.557223	1.67782	0.0102652	0.0466934	0.0319953	905	tags=50%, list=10%, signal=45%	26456/20358/18187/20315/20359/18846/20355/20360/214968/13508
GO:1902284	BP	GO:1902284	neuron projection extension involved in neuron projection guidance	20	0.557223	1.67782	0.0102652	0.0466934	0.0319953	905	tags=50%, list=10%, signal=45%	26456/20358/18187/20315/20359/18846/20355/20360/214968/13508
GO:0006338	BP	GO:0006338	chromatin remodeling	255	-0.390997	-1.37703	0.0102941	0.0467521	0.0320355	2139	tags=34%, list=25%, signal=27%	12611/66310/15353/19646/93696/330409/20588/12648/53890/12417/67382/13018/223828/12054/13435/56086/21849/433759/75425/116870/26992/66403/140858/56456/73139/268564/20466/57741/22385/56207/71952/74355/56200/59001/101612/13626/20174/53893/56505/331623/18432/22059/114741/666704/14056/20833/52615/53605/15289/64707/20937/18150/72057/217578/245688/18148/16906/231506/16907/67733/14815/51869/13433/66578/50…
GO:0048841	BP	GO:0048841	regulation of axon extension involved in axon guidance	18	0.549761	1.61195	0.0103283	0.0468344	0.0320919	905	tags=50%, list=10%, signal=45%	26456/20358/20315/20359/18846/20355/20360/214968/13508
GO:0060828	BP	GO:0060828	regulation of canonical Wnt signaling pathway	150	-0.428556	-1.46847	0.0103477	0.0468862	0.0321274	1602	tags=27%, list=18%, signal=23%	93960/20439/217011/407821/20042/20174/207181/14160/71890/56505/29806/12387/13653/27041/17242/64297/70300/260305/230899/68010/20377/328949/100201/20682/14362/70433/56458/68151/269424/26564/27412/20674/21416/107351/17127/18128/14632/20319/14634/14734/12316
GO:0010765	BP	GO:0010765	positive regulation of sodium ion transport	27	0.505192	1.69518	0.0103897	0.0468941	0.0321328	2703	tags=56%, list=31%, signal=38%	18795/11735/279561/12805/83814/75607/235281/11933/16150/11652/13430/246198/14683/56398/93692
GO:0048661	BP	GO:0048661	positive regulation of smooth muscle cell proliferation	49	-0.529293	-1.59972	0.0103716	0.0468941	0.0321328	792	tags=27%, list=9%, signal=24%	22339/13433/11677/14678/17869/15368/18214/27401/11504/18392/17863/54598/15208
GO:0070661	BP	GO:0070661	leukocyte proliferation	121	-0.43655	-1.47376	0.010376	0.0468941	0.0321328	1364	tags=29%, list=16%, signal=25%	17319/20535/15510/12387/15452/22059/18950/59009/16002/51797/11486/17260/15289/11534/14082/23918/11920/12144/17869/12445/11987/12575/17698/237877/17311/12608/12578/15201/12505/109594/12767/22417/18761/15205/14609
GO:0060996	BP	GO:0060996	dendritic spine development	101	0.311816	1.4277	0.010365	0.0468941	0.0321328	1502	tags=31%, list=17%, signal=26%	270190/56013/327814/16443/208922/18479/103967/12569/56320/243961/58234/12361/216856/545156/19280/216831/13844/19699/18163/14270/16560/236794/241638/192167/13385/22084/382253/170731/18483/11487/29819
GO:0000460	BP	GO:0000460	maturation of 5.8S rRNA	29	-0.60415	-1.6594	0.0104261	0.0469857	0.0321956	2965	tags=83%, list=34%, signal=55%	70285/19090/68533/215194/30946/50912/64934/66481/57750/74035/67842/67223/59028/67920/66362/56095/67276/66446/59014/69639/71151/18148/208366/227715
GO:1901361	BP	GO:1901361	organic cyclic compound catabolic process	259	-0.393354	-1.3852	0.010468	0.0471381	0.0323	2550	tags=42%, list=29%, signal=30%	11783/11816/213550/68134/60365/70439/22030/14874/74326/19877/66441/67493/53422/14852/74167/76014/20823/22352/110446/15384/56403/26926/71207/70640/109778/73158/71701/13555/110809/230908/192170/28114/14265/232449/22608/21379/17149/242202/19878/72662/15254/50783/67724/14359/51810/15473/210106/69902/19819/78893/239528/66583/230753/11991/52830/17766/140488/225363/16549/66362/53893/27998/230721/68209/6…
GO:0001936	BP	GO:0001936	regulation of endothelial cell proliferation	56	-0.514647	-1.57087	0.010532	0.0473899	0.0324725	1320	tags=27%, list=15%, signal=23%	18053/20683/16002/17242/17260/15289/22340/22339/15368/18760/353156/97165/12822/18654/14609
GO:1903423	BP	GO:1903423	positive regulation of synaptic vesicle recycling	13	0.639658	1.73848	0.0106196	0.047564	0.0325918	3017	tags=92%, list=35%, signal=60%	20616/103967/26875/104015/12048/192167/13429/11773/75734/233489/19057/74006
GO:0003416	BP	GO:0003416	endochondral bone growth	12	-0.735061	-1.69352	0.0105933	0.047564	0.0325918	761	tags=50%, list=9%, signal=46%	68259/11749/20682/70235/18214/59056
GO:0001824	BP	GO:0001824	blastocyst development	84	-0.483941	-1.54603	0.0106001	0.047564	0.0325918	1911	tags=37%, list=22%, signal=29%	270106/110109/14390/14791/14824/67168/14570/56456/109145/217011/67534/20683/71458/217558/11486/20937/225182/21872/27354/69270/50927/233826/12190/68119/19363/20674/76044/12649/18005/66929/20135
GO:0022406	BP	GO:0022406	membrane docking	64	0.373004	1.50049	0.010604	0.047564	0.0325918	2661	tags=58%, list=31%, signal=40%	19339/234593/20979/116837/56216/53331/22318/14681/20910/67295/19165/76787/19340/75914/18633/22249/12313/102058/382018/67808/64143/17967/67474/217893/100504663/53413/56041/19349/56491/56389/228545/56418/55943/56398/105504/211446/100226
GO:0051168	BP	GO:0051168	nuclear export	128	-0.434655	-1.46976	0.0106178	0.047564	0.0325918	2441	tags=44%, list=28%, signal=32%	353258/20383/22196/227720/66441/20823/67045/73666/53817/13726/97112/72170/57258/56291/231452/71805/192170/107939/20054/28114/17149/75547/24015/223527/67842/103573/66011/70686/234865/15526/218210/22166/329506/110750/59015/445007/103468/170762/73192/59014/21681/19387/227699/18226/18148/56488/215280/19384/13654/67628/27412/14456/240084/12578/12021/234396
GO:0009994	BP	GO:0009994	oocyte differentiation	33	-0.582953	-1.66164	0.0106445	0.0476389	0.0326432	724	tags=24%, list=8%, signal=22%	11920/12190/12531/69716/20878/67141/268697/22417
GO:1902105	BP	GO:1902105	regulation of leukocyte differentiation	125	-0.439913	-1.48328	0.0106978	0.0478407	0.0327815	1736	tags=34%, list=20%, signal=27%	18103/26992/56456/268564/63953/11350/215653/19766/18996/21847/14357/20535/17387/12387/18950/59009/14375/17242/11486/15289/72057/14082/12571/20377/12400/100201/66993/18081/17869/12193/18129/26564/17311/21873/14456/12608/12578/14087/12505/14634/211651/12192
GO:0051384	BP	GO:0051384	response to glucocorticoid	33	-0.581585	-1.65774	0.0108398	0.0484387	0.0331912	704	tags=27%, list=8%, signal=25%	14815/74551/83383/12193/19712/20181/13685/17927/12192
GO:0045685	BP	GO:0045685	regulation of glial cell differentiation	40	-0.572276	-1.67484	0.011043	0.0491994	0.0337125	638	tags=32%, list=7%, signal=30%	12387/107503/17242/103743/20664/50913/13654/18213/21416/15208/18128/12767/15205
GO:0098739	BP	GO:0098739	import across plasma membrane	70	0.336556	1.3915	0.0110437	0.0491994	0.0337125	1547	tags=39%, list=18%, signal=32%	11847/232975/223604/14816/16519/16522/21366/279561/12288/19122/110891/12290/215113/238276/83704/12287/75607/14360/236794/216739/19055/65106/26457/11933/241296/12289/20541
GO:0043266	BP	GO:0043266	regulation of potassium ion transport	53	0.394243	1.52405	0.0110693	0.0492755	0.0337646	1884	tags=42%, list=22%, signal=33%	241528/14419/16485/432442/22318/16502/109676/11735/279561/13483/19122/238276/30948/83814/75607/14682/18693/11933/12289/75785/100986/19211
GO:0001837	BP	GO:0001837	epithelial to mesenchymal transition	85	-0.466717	-1.49348	0.01113	0.0495082	0.033924	1225	tags=29%, list=14%, signal=26%	71890/70769/12387/14056/17242/15213/15376/106628/70300/21453/102693/22339/68010/20377/208177/20682/15117/16449/100182/21416/17127/18128/20319/71878/14609
GO:1902652	BP	GO:1902652	secondary alcohol metabolic process	76	0.34645	1.48614	0.0111967	0.0497669	0.0341013	1705	tags=45%, list=20%, signal=36%	69863/73166/192156/208715/100102/15926/18194/20597/66234/67800/16987/14137/11305/20775/13121/68603/16971/15357/11370/74754/18145/230101/16890/13360/235293/110196/217265/11820/17855/20788/72999/231070/15490/18984
GO:0051493	BP	GO:0051493	regulation of cytoskeleton organization	326	-0.372831	-1.32137	0.0112583	0.0499268	0.0342109	938	tags=17%, list=11%, signal=15%	56430/66616/214444/73420/18226/18148/17318/21872/242687/219103/102693/544963/268970/66140/26920/12695/11867/76123/18008/208177/225115/11853/17475/18213/234094/73910/234686/70420/18129/77744/20873/107351/228421/21335/56742/12704/17127/100502766/80986/12449/219114/13717/20460/54141/13605/18817/66468/30794/209737/22417/72119/404710/18761/14609
GO:0006289	BP	GO:0006289	nucleotide-excision repair	64	-0.497427	-1.54452	0.0112694	0.0499299	0.034213	1706	tags=36%, list=20%, signal=29%	15312/26992/140917/56456/108689/14088/55947/68240/22059/18294/15289/18207/15574/72057/27015/67967/66993/68275/18971/12190/19891/18973/237911
GO:0042982	BP	GO:0042982	amyloid precursor protein metabolic process	52	0.392513	1.5124	0.0112762	0.0499299	0.034213	1488	tags=37%, list=17%, signal=30%	56846/13638/104001/18212/16432/18196/27403/19165/19122/11305/74754/30948/68585/64294/11820/208117/23821/382018/11487
GO:0001655	BP	GO:0001655	urogenital system development	23	-0.630075	-1.65517	0.0113124	0.0500523	0.0342968	755	tags=30%, list=9%, signal=28%	20377/20682/15201/14633/20181/12505/18128
GO:0009157	BP	GO:0009157	deoxyribonucleoside monophosphate biosynthetic process	10	-0.762696	-1.68317	0.0113477	0.0501543	0.0343667	920	tags=70%, list=11%, signal=63%	18103/13178/11534/110074/22171/20425/21877
GO:0003158	BP	GO:0003158	endothelium development	66	-0.501818	-1.56517	0.0113526	0.0501543	0.0343667	1214	tags=27%, list=14%, signal=24%	12387/216527/20672/15213/22350/29876/21872/22339/14314/14362/17698/622434/16449/21873/13388/18128/12767/12822
GO:0050727	BP	GO:0050727	regulation of inflammatory response	107	-0.444171	-1.48191	0.011401	0.0502533	0.0344346	1034	tags=29%, list=12%, signal=26%	85305/14182/19261/63953/242864/20085/19766/353187/15510/11669/17242/11486/244329/64297/16852/230899/20361/11920/18081/72565/56312/100182/12608/14087/12505/17127/54598/23871/16956/211651/52033
GO:0090092	BP	GO:0090092	regulation of transmembrane receptor protein serine/threonine kinase signaling pathway	118	-0.434722	-1.46535	0.0113902	0.0502533	0.0344346	857	tags=20%, list=10%, signal=19%	20660/329506/69260/60406/22059/245688/170676/68010/20377/65112/14314/12577/14362/18129/21416/244058/17127/15208/18128/20319/16007/14560/14734/15205
GO:0050671	BP	GO:0050671	positive regulation of lymphocyte proliferation	39	-0.558042	-1.62773	0.0114418	0.0503575	0.034506	1107	tags=36%, list=13%, signal=31%	18950/16002/11486/17260/15289/11534/14082/12144/11987/12575/237877/17311/18761/15205
GO:0072710	BP	GO:0072710	response to hydroxyurea	10	-0.762516	-1.68277	0.0114653	0.050385	0.0345248	618	tags=40%, list=7%, signal=37%	224008/12144/21853/19361
GO:0021535	BP	GO:0021535	cell migration in hindbrain	21	0.537988	1.64933	0.0114633	0.050385	0.0345248	865	tags=29%, list=10%, signal=26%	270190/57754/18072/12386/93686/13844
GO:0035116	BP	GO:0035116	embryonic hindlimb morphogenesis	12	-0.732284	-1.68712	0.0114996	0.0504979	0.0346022	381	tags=33%, list=4%, signal=32%	12387/11695/18128/14734
GO:0032816	BP	GO:0032816	positive regulation of natural killer cell activation	11	-0.736653	-1.67161	0.0115445	0.0506568	0.0347111	276	tags=36%, list=3%, signal=35%	268564/14456/225471/77777
GO:0045806	BP	GO:0045806	negative regulation of endocytosis	29	0.483757	1.66554	0.0116175	0.0509389	0.0349044	1923	tags=62%, list=22%, signal=49%	107065/100102/23969/227738/27403/11735/11305/229521/22248/13385/53378/16976/22084/68420/268445/56807/54609/75659
GO:0001935	BP	GO:0001935	endothelial cell proliferation	62	-0.500803	-1.54638	0.0116798	0.0511351	0.0350388	1052	tags=26%, list=12%, signal=23%	18053/20683/16002/17242/17260/15289/22340/22339/15368/18760/353156/20778/97165/12822/18654/14609
GO:0050867	BP	GO:0050867	positive regulation of cell activation	140	-0.426392	-1.45505	0.0116732	0.0511351	0.0350388	1713	tags=34%, list=20%, signal=27%	85305/14182/26992/19261/56456/268564/63953/11350/12043/66362/17319/17685/15510/71890/20909/17387/18950/14375/16002/17242/11486/17260/15289/17350/72057/11534/55982/16852/14082/230899/12400/51869/66993/12144/11987/12575/18214/237877/12010/17311/14456/225471/17863/14634/77777/18761/15205
GO:2000310	BP	GO:2000310	regulation of NMDA receptor activity	13	0.63447	1.72438	0.0116911	0.0511462	0.0350464	1211	tags=62%, list=14%, signal=53%	12794/18189/60597/13844/19699/15980/192167/13385
GO:0031440	BP	GO:0031440	regulation of mRNA 3'-end processing	17	-0.665403	-1.65701	0.0117658	0.0514344	0.0352439	55	tags=18%, list=1%, signal=18%	68219/268697/12192
GO:0035567	BP	GO:0035567	non-canonical Wnt signaling pathway	31	-0.587118	-1.64738	0.011806	0.0515715	0.0353379	761	tags=23%, list=9%, signal=21%	68259/20377/14362/26564/20319/22417/14734
GO:0097352	BP	GO:0097352	autophagosome maturation	33	0.45523	1.58302	0.0118481	0.051717	0.0354376	3224	tags=70%, list=37%, signal=44%	70381/66734/12313/116733/74374/105513/234852/100502841/67474/67526/100504663/68953/94178/17281/67064/20615/76959/77573/100502698/72175/75909/225326/78610
GO:0060043	BP	GO:0060043	regulation of cardiac muscle cell proliferation	28	-0.612013	-1.67231	0.0119076	0.0518216	0.0355092	457	tags=25%, list=5%, signal=24%	18712/18128/14632/19662/268697/12534/14609
GO:2000369	BP	GO:2000369	regulation of clathrin-dependent endocytosis	16	0.584132	1.66518	0.0119053	0.0518216	0.0355092	2866	tags=81%, list=33%, signal=55%	20616/72685/20404/229521/22248/54609/213326/269774/13430/227333/20408/29816/233489
GO:0034644	BP	GO:0034644	cellular response to UV	60	-0.507093	-1.55969	0.0118864	0.0518216	0.0355092	1910	tags=42%, list=22%, signal=33%	245000/13665/76867/76293/268564/57741/72440/65964/11545/80905/20174/12530/12018/22059/70238/18148/27015/67967/18971/12575/18538/74041/12649/52033/20877
GO:0002437	BP	GO:0002437	inflammatory response to antigenic stimulus	19	-0.666276	-1.69819	0.0119645	0.051953	0.0355993	567	tags=21%, list=7%, signal=20%	269378/18129/97165/18128
GO:0019439	BP	GO:0019439	aromatic compound catabolic process	254	-0.385628	-1.35852	0.0119595	0.051953	0.0355993	2713	tags=44%, list=31%, signal=32%	214627/66094/11792/234594/228994/13211/15381/50912/17161/11783/213550/68134/60365/70439/22030/14874/74326/19877/66441/67493/53422/14852/74167/76014/20823/22352/110446/15384/56403/26926/71207/70640/109778/73158/71701/13555/110809/230908/192170/28114/14265/232449/22608/21379/17149/242202/19878/72662/15254/50783/67724/14359/51810/15473/210106/69902/19819/78893/239528/66583/230753/11991/52830/17766/1…
GO:0001776	BP	GO:0001776	leukocyte homeostasis	49	-0.526608	-1.59161	0.0120237	0.0520608	0.0356731	1589	tags=37%, list=18%, signal=30%	11350/12043/216892/17319/12018/83964/11486/17260/15289/18578/14082/210293/30954/108156/17311/12505/109594/12442
GO:1901605	BP	GO:1901605	alpha-amino acid metabolic process	100	-0.445344	-1.47174	0.012025	0.0520608	0.0356731	1595	tags=35%, list=18%, signal=29%	210009/26432/12041/18242/14287/214579/69051/14450/14629/109079/108037/209027/108682/52633/107272/18263/51797/66514/57295/20751/237823/27053/100678/69719/69219/231327/108156/269378/107869/66902/13361/22117/236539/20425/71562
GO:0046942	BP	GO:0046942	carboxylic acid transport	117	0.297099	1.39207	0.0120124	0.0520608	0.0356731	1573	tags=33%, list=18%, signal=28%	11847/14812/12904/64051/56018/319924/18212/18479/14816/18037/21366/268860/20910/68267/68039/215113/140919/12298/54393/94280/214663/26569/14077/26420/13358/12934/229517/20617/27416/216739/65106/19156/26457/268706/208638/72961/241296/72055/12903
GO:0098609	BP	GO:0098609	cell-cell adhesion	335	-0.365974	-1.29877	0.0120018	0.0520608	0.0356731	1398	tags=25%, list=16%, signal=22%	20416/20912/16785/219228/140579/110829/14357/20535/15510/71890/17886/12564/74762/83964/12387/192216/18950/20733/18208/16002/17242/11486/15289/227937/14804/16973/72057/11534/53599/16852/14107/20443/14082/21872/70546/12561/22339/20868/12400/11658/54725/66993/18081/12144/58235/12552/80883/20682/11987/67374/17698/13602/23836/67916/56741/117606/12010/23828/15117/110789/16449/100182/116701/68810/17311/…
GO:1901880	BP	GO:1901880	negative regulation of protein depolymerization	54	0.387458	1.49653	0.0120996	0.0523063	0.0358413	1275	tags=37%, list=15%, signal=32%	23805/20257/67254/69697/17756/17755/99512/260315/234695/11789/17754/68732/14168/11519/208158/76499/20740/50876/20742/14026
GO:0060122	BP	GO:0060122	inner ear receptor cell stereocilium organization	19	-0.666115	-1.69778	0.0121726	0.0525827	0.0360307	410	tags=42%, list=5%, signal=40%	67042/236266/15213/73750/110789/19712/15208/15205
GO:0042311	BP	GO:0042311	vasodilation	21	-0.635886	-1.65172	0.0122108	0.0527088	0.0361172	846	tags=19%, list=10%, signal=17%	230899/22339/233765/14609
GO:0031641	BP	GO:0031641	regulation of myelination	30	-0.595408	-1.65362	0.0122515	0.0528455	0.0362108	638	tags=30%, list=7%, signal=28%	18053/12387/103743/67374/13654/21416/20181/15208/381293
GO:0060420	BP	GO:0060420	regulation of heart growth	47	-0.527741	-1.58562	0.0122978	0.0529736	0.0362986	1188	tags=28%, list=14%, signal=24%	232334/67603/11546/17260/106628/14815/18712/18128/14632/19662/268697/12534/14609
GO:0015931	BP	GO:0015931	nucleobase-containing compound transport	140	-0.424279	-1.44784	0.0123085	0.0529736	0.0362986	2104	tags=38%, list=24%, signal=29%	71701/110809/71805/192170/107939/28114/14265/22608/208691/16211/67843/17149/229279/63959/69482/223527/103573/67681/66011/140488/16549/234865/19766/237082/225027/218210/69912/226747/59015/445007/103468/170762/73192/100604/21681/227699/72787/76438/223921/18226/242585/18148/74013/56488/170676/19384/54563/20492/69736/140486/22117/12192/14609
GO:0031668	BP	GO:0031668	cellular response to extracellular stimulus	138	-0.423865	-1.44296	0.0123478	0.0531037	0.0363878	1543	tags=25%, list=18%, signal=21%	18810/17766/12043/20525/21847/52187/230784/16828/235036/18432/22059/27368/15376/20937/69305/27053/22427/18024/52639/66422/11910/12575/57875/56458/18760/18712/109270/20787/14456/21416/20181/16956/20319/17927/22417
GO:0003209	BP	GO:0003209	cardiac atrium morphogenesis	14	-0.704346	-1.66899	0.0123728	0.053172	0.0364346	377	tags=21%, list=4%, signal=21%	18129/18128/16007
GO:0016331	BP	GO:0016331	morphogenesis of embryonic epithelium	101	-0.451073	-1.48809	0.0125784	0.053976	0.0369854	883	tags=18%, list=10%, signal=16%	70300/21677/20377/19206/21815/108156/20682/58198/14362/244058/20681/14633/16776/240641/15208/20460/20319/22417
GO:0071396	BP	GO:0071396	cellular response to lipid	214	-0.398964	-1.39462	0.0125701	0.053976	0.0369854	1027	tags=17%, list=12%, signal=16%	17260/15289/67017/18578/21677/19385/20377/19206/22038/11920/14815/16367/74551/83383/20682/20602/210044/17698/12193/27401/18712/12010/21380/56615/70097/19712/12608/225471/67749/20181/110784/12189/235527/13685/16956/17927/12192
GO:0042102	BP	GO:0042102	positive regulation of T cell proliferation	26	-0.610666	-1.63812	0.0127739	0.054721	0.0374959	1107	tags=38%, list=13%, signal=34%	18950/16002/15289/11534/14082/12144/11987/17311/18761/15205
GO:0060441	BP	GO:0060441	epithelial tube branching involved in lung morphogenesis	14	-0.701479	-1.6622	0.0128268	0.0548807	0.0376054	1324	tags=43%, list=15%, signal=36%	237500/12387/15376/20682/20674/15245
GO:0006760	BP	GO:0006760	folic acid-containing compound metabolic process	17	-0.662927	-1.65085	0.0128451	0.0549189	0.0376316	1696	tags=71%, list=20%, signal=57%	108147/238505/216188/210009/14287/14450/108037/108156/17768/13361/22171/20425
GO:0060713	BP	GO:0060713	labyrinthine layer morphogenesis	10	-0.759465	-1.67604	0.012881	0.0549276	0.0376376	293	tags=40%, list=3%, signal=39%	20733/13875/16007/12192
GO:0016446	BP	GO:0016446	somatic hypermutation of immunoglobulin genes	10	-0.759263	-1.67559	0.012881	0.0549276	0.0376376	1363	tags=60%, list=16%, signal=51%	17685/17350/17688/77782/22256/26909
GO:1901021	BP	GO:1901021	positive regulation of calcium ion transmembrane transporter activity	29	0.477407	1.64368	0.0128848	0.0549276	0.0376376	1414	tags=38%, list=16%, signal=32%	68312/109676/57440/238276/12298/12293/12297/20191/12313/237611/19055
GO:1900180	BP	GO:1900180	regulation of protein localization to nucleus	102	-0.443368	-1.46535	0.0128829	0.0549276	0.0376376	882	tags=22%, list=10%, signal=20%	230784/18053/29867/28036/70769/20019/18226/18148/70572/19384/103743/72565/18760/11600/21416/12578/12189/16543/13605/14634/12534/18761
GO:0032814	BP	GO:0032814	regulation of natural killer cell activation	13	-0.723074	-1.69273	0.0129052	0.0549741	0.0376694	276	tags=31%, list=3%, signal=30%	268564/14456/225471/77777
GO:0009127	BP	GO:0009127	purine nucleoside monophosphate biosynthetic process	19	-0.664014	-1.69242	0.0130049	0.0553584	0.0379327	1506	tags=63%, list=17%, signal=52%	13178/11564/14450/15452/18950/11486/11534/237823/23918/67054/231327/110639
GO:0002566	BP	GO:0002566	somatic diversification of immune receptors via somatic mutation	11	-0.733261	-1.66391	0.0130446	0.0554465	0.0379931	1363	tags=55%, list=16%, signal=46%	17685/17350/17688/77782/22256/26909
GO:0046854	BP	GO:0046854	phosphatidylinositol phosphate biosynthetic process	32	0.476438	1.6434	0.013139	0.0557668	0.0382126	3323	tags=72%, list=38%, signal=45%	232086/18710/668212/240752/18709/16329/18708/76500/27399/108083/100504663/233011/224020/216233/56468/55980/18706/117150/107650/225326/18718/78610/23827
GO:0030177	BP	GO:0030177	positive regulation of Wnt signaling pathway	81	-0.473297	-1.51407	0.0131551	0.0557946	0.0382316	899	tags=16%, list=10%, signal=15%	64297/68010/20377/58198/68151/26564/27412/107351/17127/20319/14734/12316/218581
GO:1902117	BP	GO:1902117	positive regulation of organelle assembly	65	-0.489014	-1.52389	0.0131747	0.0558368	0.0382606	1303	tags=28%, list=15%, signal=24%	101565/72776/27041/15114/70300/18226/219103/52639/76123/230872/381644/20969/17698/76561/20873/17427/20460/54141
GO:0072574	BP	GO:0072574	hepatocyte proliferation	14	-0.700423	-1.6597	0.0132809	0.0560514	0.0384075	377	tags=64%, list=4%, signal=62%	12633/16438/110829/17242/18129/12608/12578/14632/17345
GO:0072575	BP	GO:0072575	epithelial cell proliferation involved in liver morphogenesis	14	-0.700423	-1.6597	0.0132809	0.0560514	0.0384075	377	tags=64%, list=4%, signal=62%	12633/16438/110829/17242/18129/12608/12578/14632/17345
GO:0051251	BP	GO:0051251	positive regulation of lymphocyte activation	122	-0.433541	-1.46398	0.0132574	0.0560514	0.0384075	1702	tags=34%, list=20%, signal=27%	26992/19261/56456/268564/63953/11350/12043/66362/17319/17685/15510/71890/17387/18950/14375/16002/17242/11486/17260/15289/17350/72057/11534/55982/16852/14082/12400/51869/66993/12144/11987/12575/237877/12010/17311/14456/225471/14634/77777/18761/15205
GO:0097435	BP	GO:0097435	supramolecular fiber organization	410	-0.356736	-1.27774	0.0132535	0.0560514	0.0384075	939	tags=16%, list=11%, signal=15%	109711/56430/69675/66616/22350/214444/73420/14107/102866/17318/21872/242687/22004/14580/219103/16332/544963/215280/56693/18080/54004/268970/12955/11867/208177/171580/225115/70799/109242/11853/17997/18214/13008/234094/73910/234686/70420/12010/67203/54132/12578/107351/228421/21335/68794/56742/12704/17127/80986/13717/53318/20319/237360/67141/12832/237436/16949/56419/30794/12822/22417/72119/73804/187…
GO:0016071	BP	GO:0016071	mRNA metabolic process	498	-0.350847	-1.26248	0.0132535	0.0560514	0.0384075	3254	tags=57%, list=37%, signal=38%	51786/70044/63856/19134/12729/320632/72502/320720/53607/67010/101122/20227/18789/192159/80913/20815/72935/72198/192196/105083/77134/210529/76781/24128/319322/74203/269966/232791/67465/66354/66464/76479/50926/73473/69577/66899/233871/21374/101214/225432/66231/71702/268420/217980/74351/233908/66185/433702/24018/56031/53610/66926/338359/231464/23983/69192/74133/236732/20220/11911/75553/212880/225929…
GO:0031396	BP	GO:0031396	regulation of protein ubiquitination	138	-0.422217	-1.43735	0.0133037	0.0560987	0.03844	553	tags=19%, list=6%, signal=18%	16898/104806/14629/71890/12237/213539/77891/55982/18148/12257/105837/27401/11600/107831/67121/56150/70097/327799/12578/12189/208836/107995/67141/18817/12236/11799
GO:0098926	BP	GO:0098926	postsynaptic signal transduction	31	0.46154	1.59139	0.0133655	0.0562778	0.0385627	1372	tags=45%, list=16%, signal=38%	110834/18795/12569/23934/109305/234214/11444/18751/77531/20411/12326/14682/20848/382056
GO:0048259	BP	GO:0048259	regulation of receptor-mediated endocytosis	77	0.335819	1.44279	0.0134319	0.0565166	0.0387264	2355	tags=52%, list=27%, signal=38%	23892/107065/20616/72685/100102/23969/109689/20404/14251/238276/11305/229521/17957/22248/94190/13642/104015/18717/13385/18693/53378/16976/11820/68420/18750/268445/67979/12121/22041/54609/213326/56044/75659/269774/16568/56715/13430/11773/69727/64383
GO:0031349	BP	GO:0031349	positive regulation of defense response	133	-0.430305	-1.46125	0.0134487	0.0565467	0.038747	1713	tags=29%, list=20%, signal=24%	85305/13205/22031/14182/216190/12261/20466/242864/67917/19376/67070/20085/19766/15510/73945/14375/17242/17260/15289/76438/64297/16852/14082/230899/22038/54725/18081/67486/78781/56312/20787/12608/225471/97165/214763/23871/16956/77777/14609
GO:0061462	BP	GO:0061462	protein localization to lysosome	39	0.406498	1.47249	0.0134749	0.0566157	0.0387943	3337	tags=67%, list=38%, signal=41%	74772/81905/68585/68299/12492/98402/54377/116733/68421/20661/66096/74718/56700/11776/100504663/218699/19349/70394/70297/15239/230676/225326/81904/68576/66868/260302
GO:0010766	BP	GO:0010766	negative regulation of sodium ion transport	12	0.643894	1.7213	0.0134849	0.056617	0.0387952	1051	tags=50%, list=12%, signal=44%	108058/100102/279561/69106/83814/75607
GO:0003338	BP	GO:0003338	metanephros morphogenesis	11	-0.731122	-1.65906	0.0135063	0.0566256	0.038801	647	tags=64%, list=7%, signal=59%	12705/20682/58198/20681/15208/22417/15205
GO:0072273	BP	GO:0072273	metanephric nephron morphogenesis	11	-0.731122	-1.65906	0.0135063	0.0566256	0.038801	647	tags=64%, list=7%, signal=59%	12705/20682/58198/20681/15208/22417/15205
GO:0010464	BP	GO:0010464	regulation of mesenchymal cell proliferation	24	-0.613784	-1.6259	0.0135544	0.0567864	0.0389112	2074	tags=58%, list=24%, signal=45%	21417/18109/319757/14182/12166/114142/12387/15289/16367/17869/20682/21380/18590/14451
GO:0048706	BP	GO:0048706	embryonic skeletal system development	46	-0.538158	-1.60326	0.0135752	0.0568024	0.0389222	1274	tags=28%, list=15%, signal=24%	20683/17387/12387/17260/54352/70300/242585/21380/11695/17127/19662/14634/14451
GO:0045637	BP	GO:0045637	regulation of myeloid cell differentiation	95	-0.450478	-1.47517	0.0135777	0.0568024	0.0389222	1027	tags=28%, list=12%, signal=25%	19766/15526/18996/21847/12387/17260/15289/67017/229700/14082/12571/20377/100201/18081/17869/12010/18129/16449/26564/17311/21873/13388/12608/97165/17863/23871/12192
GO:0110110	BP	GO:0110110	positive regulation of animal organ morphogenesis	10	-0.757832	-1.67243	0.01359	0.0568133	0.0389296	1320	tags=70%, list=15%, signal=59%	14182/18053/12387/20682/20681/14186/22417
GO:0009167	BP	GO:0009167	purine ribonucleoside monophosphate metabolic process	21	-0.629014	-1.63386	0.0136474	0.0570121	0.0390659	1424	tags=57%, list=16%, signal=48%	11564/14450/15452/11637/18950/11486/11534/237823/23918/67054/231327/110639
GO:0055023	BP	GO:0055023	positive regulation of cardiac muscle tissue growth	24	-0.613375	-1.62482	0.0137582	0.0574341	0.0393551	1069	tags=38%, list=12%, signal=33%	11546/17260/106628/14815/18712/18128/14632/268697/12534
GO:0030155	BP	GO:0030155	regulation of cell adhesion	319	-0.367771	-1.30274	0.0138134	0.0576232	0.0394846	1339	tags=22%, list=15%, signal=20%	110829/14357/20535/15510/71890/17886/20349/20909/17387/74762/83964/226519/67694/18186/18950/20733/16002/17242/11486/15289/72057/11534/16852/20443/14082/21872/70546/12571/22339/67784/12400/11920/54357/66993/18081/12144/208177/18854/20682/11987/67374/14268/11600/67916/13842/64075/12010/15117/16449/100182/17311/13388/20674/330662/12608/12578/14114/107351/12505/16776/17127/14115/18128/23871/14634/127…
GO:0044331	BP	GO:0044331	cell-cell adhesion mediated by cadherin	21	-0.628277	-1.63195	0.0138526	0.0577455	0.0395684	1308	tags=48%, list=15%, signal=41%	71890/12564/21872/12561/22339/12552/23836/233765/18128/12555
GO:0045581	BP	GO:0045581	negative regulation of T cell differentiation	16	-0.665541	-1.62775	0.0139707	0.0581965	0.0398774	1338	tags=50%, list=15%, signal=42%	14357/20535/17242/15289/12400/12578/12505/14634
GO:1900182	BP	GO:1900182	positive regulation of protein localization to nucleus	62	-0.497412	-1.53591	0.0139978	0.0582677	0.0399263	855	tags=19%, list=10%, signal=18%	18148/70572/19384/72565/18760/21416/12578/12189/13605/14634/12534/18761
GO:0002763	BP	GO:0002763	positive regulation of myeloid leukocyte differentiation	21	-0.627175	-1.62909	0.0140578	0.0584756	0.0400687	1417	tags=48%, list=16%, signal=40%	19766/18996/21847/14082/100201/18081/18129/26564/17311/12192
GO:0042987	BP	GO:0042987	amyloid precursor protein catabolic process	42	0.417157	1.53562	0.0141295	0.0587322	0.0402445	1488	tags=36%, list=17%, signal=30%	13638/104001/18212/27403/19165/19122/11305/74754/30948/68585/11820/208117/23821/382018/11487
GO:0009617	BP	GO:0009617	response to bacterium	160	-0.409054	-1.40741	0.0142221	0.0590749	0.0404794	1127	tags=18%, list=13%, signal=16%	14229/17975/17260/15289/17350/66373/18578/22038/17750/12705/70799/18760/107831/12010/18129/56615/68810/70097/20778/12608/12369/225471/106869/97165/235527/15064/16956/237436/14734
GO:0035459	BP	GO:0035459	vesicle cargo loading	18	0.5399	1.58304	0.0143714	0.0596102	0.0408461	3086	tags=67%, list=35%, signal=43%	16553/64933/11777/231070/20334/11776/11775/67231/77371/233489/19324/218811
GO:0010712	BP	GO:0010712	regulation of collagen metabolic process	21	-0.62648	-1.62728	0.0144682	0.0599692	0.0410921	513	tags=24%, list=6%, signal=22%	18214/14268/17863/18128/22417
GO:0014706	BP	GO:0014706	striated muscle tissue development	126	-0.435062	-1.46891	0.0144962	0.0600425	0.0411423	1069	tags=18%, list=12%, signal=16%	11546/17260/15213/14615/106628/14082/22339/14815/18712/11600/117606/23828/13388/20181/17127/18128/14632/19662/268697/12534/17927/108000/14609
GO:0032228	BP	GO:0032228	regulation of synaptic transmission, GABAergic	21	0.529362	1.62288	0.0145874	0.0603717	0.0413679	1206	tags=38%, list=14%, signal=33%	227120/13869/18189/20910/216856/170571/12801/192167
GO:0033238	BP	GO:0033238	regulation of amine metabolic process	18	0.539445	1.58171	0.0146171	0.0603717	0.0413679	512	tags=28%, list=6%, signal=26%	16467/18574/11444/268860/11789
GO:0045324	BP	GO:0045324	late endosome to vacuole transport	18	0.538187	1.57802	0.0146171	0.0603717	0.0413679	3588	tags=89%, list=41%, signal=52%	77975/66914/71817/116733/68192/105513/234852/230514/68953/67064/76959/104831/27681/20844/66700/66201
GO:0007200	BP	GO:0007200	phospholipase C-activating G protein-coupled receptor signaling pathway	18	0.537735	1.57669	0.0146171	0.0603717	0.0413679	1068	tags=44%, list=12%, signal=39%	18799/18795/14816/109305/18751/14761/12652/14682
GO:0072697	BP	GO:0072697	protein localization to cell cortex	11	-0.725896	-1.6472	0.0146607	0.0605089	0.041462	897	tags=55%, list=10%, signal=49%	26425/22350/13822/76123/72080/18817
GO:0014009	BP	GO:0014009	glial cell proliferation	40	-0.566392	-1.65762	0.0146919	0.0605949	0.0415209	1214	tags=32%, list=14%, signal=28%	12387/13167/22059/18208/14580/269951/12257/17869/20539/104156/17863/18128/15205
GO:0031110	BP	GO:0031110	regulation of microtubule polymerization or depolymerization	68	0.347756	1.41257	0.0147386	0.0607446	0.0416234	1155	tags=38%, list=13%, signal=33%	23805/56471/20257/67254/22153/17762/100732/69697/72205/17756/17755/18479/99512/260315/11789/17754/76686/212307/20262/14168/208158/76499/230101/13191/105439/20617
GO:0030258	BP	GO:0030258	lipid modification	99	0.298263	1.34727	0.0147592	0.0607865	0.0416522	2525	tags=47%, list=29%, signal=34%	14421/216152/272031/53627/114886/13139/235044/26877/67800/56077/103199/75769/11430/170749/19062/113868/14077/11370/230101/104015/16922/67216/12801/219135/210376/19012/66887/80911/229791/18984/110460/19211/53322/64436/380921/11652/101490/74302/13350/270076/53332/14792/219024/19305/227333/75387/104418
GO:0042772	BP	GO:0042772	DNA damage response, signal transduction resulting in transcription	17	-0.65741	-1.63711	0.0147881	0.0608626	0.0417043	1308	tags=53%, list=15%, signal=45%	71890/67071/22059/56190/83383/12575/12190/14235/50883
GO:1902950	BP	GO:1902950	regulation of dendritic spine maintenance	11	0.654663	1.69874	0.0150344	0.0617318	0.0422999	2586	tags=82%, list=30%, signal=58%	14812/241514/19122/14810/14360/11820/228880/12631/65114
GO:0000469	BP	GO:0000469	cleavage involved in rRNA processing	25	-0.622689	-1.65789	0.0150426	0.0617318	0.0422999	2722	tags=76%, list=31%, signal=52%	215194/30946/50912/104662/66481/74035/213895/67842/59028/66362/52530/67276/66446/59014/69639/71151/18148/208366/227715
GO:1902893	BP	GO:1902893	regulation of miRNA transcription	40	-0.563982	-1.65056	0.015076	0.0617318	0.0422999	1320	tags=38%, list=15%, signal=32%	12166/18021/18053/13653/22059/30877/14815/17869/20682/20602/20787/19712/17127/17863/23871
GO:0032964	BP	GO:0032964	collagen biosynthetic process	21	-0.625011	-1.62347	0.0150839	0.0617318	0.0422999	513	tags=24%, list=6%, signal=22%	18214/14268/17863/18128/22417
GO:0061041	BP	GO:0061041	regulation of wound healing	43	-0.534198	-1.58857	0.0150542	0.0617318	0.0422999	1017	tags=33%, list=12%, signal=29%	15289/15376/20443/22340/18024/208177/18214/19128/107351/18590/17127/12767/22417/14609
GO:0007040	BP	GO:0007040	lysosome organization	47	0.384912	1.46007	0.0150635	0.0617318	0.0422999	3656	tags=70%, list=42%, signal=41%	12721/74438/11984/14339/11432/77963/105513/234852/15211/68953/68365/192236/67064/20615/19349/73658/320191/70495/66241/228545/65114/76959/77573/72175/67166/107650/211286/18711/72392/66700/12752/195040/223593
GO:0080171	BP	GO:0080171	lytic vacuole organization	47	0.384912	1.46007	0.0150635	0.0617318	0.0422999	3656	tags=70%, list=42%, signal=41%	12721/74438/11984/14339/11432/77963/105513/234852/15211/68953/68365/192236/67064/20615/19349/73658/320191/70495/66241/228545/65114/76959/77573/72175/67166/107650/211286/18711/72392/66700/12752/195040/223593
GO:1904036	BP	GO:1904036	negative regulation of epithelial cell apoptotic process	31	-0.575666	-1.61525	0.015179	0.0620341	0.0425071	1645	tags=48%, list=19%, signal=39%	12633/11350/12043/110829/236266/17242/18024/15368/57875/54409/11600/56312/11921/14456/21416
GO:1902742	BP	GO:1902742	apoptotic process involved in development	16	-0.662156	-1.61947	0.0152908	0.0624472	0.0427901	931	tags=50%, list=11%, signal=45%	12018/16973/12955/18854/12578/12649/18128/16007
GO:0031032	BP	GO:0031032	actomyosin structure organization	104	-0.44626	-1.48076	0.0153083	0.0624748	0.042809	842	tags=19%, list=10%, signal=18%	21872/242687/13822/54357/268970/26934/208177/11853/13008/234094/234686/54132/68794/17127/13717/13605/30794/68743/22417/18761
GO:1901655	BP	GO:1901655	cellular response to ketone	48	-0.525004	-1.58171	0.0154035	0.0628195	0.0430452	955	tags=25%, list=11%, signal=22%	69305/237211/14815/74551/83383/11677/12144/210044/17698/14456/110784/13685
GO:0060603	BP	GO:0060603	mammary gland duct morphogenesis	17	-0.656329	-1.63442	0.0154357	0.062907	0.0431052	1072	tags=47%, list=12%, signal=41%	18208/16973/19206/14815/18854/104156/14633/22417
GO:0045785	BP	GO:0045785	positive regulation of cell adhesion	184	-0.408412	-1.421	0.01549	0.0630842	0.0432266	1162	tags=23%, list=13%, signal=20%	226519/67694/18186/18950/16002/17242/11486/15289/72057/11534/16852/20443/14082/21872/12571/22339/12400/11920/54357/66993/18081/12144/11987/14268/11600/67916/64075/12010/15117/17311/20674/330662/14114/12505/17127/14115/23871/14634/16007/22417/18761/15205
GO:0043242	BP	GO:0043242	negative regulation of protein-containing complex disassembly	60	0.370147	1.47614	0.0155997	0.0634144	0.0434528	1838	tags=43%, list=21%, signal=34%	23805/20257/67254/69697/17756/17755/99512/260315/234695/11789/17754/68732/14168/11519/208158/76499/20740/50876/20742/14026/11518/74374/227634/140810/67886/76707
GO:0009165	BP	GO:0009165	nucleotide biosynthetic process	156	-0.416049	-1.4302	0.0156037	0.0634144	0.0434528	1736	tags=27%, list=20%, signal=22%	18103/85305/74450/13806/56749/80914/67942/13178/11545/11564/14450/56520/15452/11637/18950/51797/11486/54195/19139/70025/11534/21915/230899/237823/269951/23918/67054/69719/22247/231327/17869/108156/210044/15444/110074/20133/110639/22171/320685/20425/20135/21877
GO:1901293	BP	GO:1901293	nucleoside phosphate biosynthetic process	156	-0.416049	-1.4302	0.0156037	0.0634144	0.0434528	1736	tags=27%, list=20%, signal=22%	18103/85305/74450/13806/56749/80914/67942/13178/11545/11564/14450/56520/15452/11637/18950/51797/11486/54195/19139/70025/11534/21915/230899/237823/269951/23918/67054/69719/22247/231327/17869/108156/210044/15444/110074/20133/110639/22171/320685/20425/20135/21877
GO:0032873	BP	GO:0032873	negative regulation of stress-activated MAPK cascade	30	-0.588629	-1.6348	0.0156381	0.0634657	0.043488	897	tags=27%, list=10%, signal=24%	22350/230899/20377/56458/244923/14235/20319/52033
GO:0070303	BP	GO:0070303	negative regulation of stress-activated protein kinase signaling cascade	30	-0.588629	-1.6348	0.0156381	0.0634657	0.043488	897	tags=27%, list=10%, signal=24%	22350/230899/20377/56458/244923/14235/20319/52033
GO:0034446	BP	GO:0034446	substrate adhesion-dependent cell spreading	55	-0.505687	-1.543	0.0157339	0.0637219	0.0436636	1695	tags=38%, list=19%, signal=31%	12261/22319/57373/60595/11350/108911/110829/226519/18186/17242/72007/20377/14268/23828/15117/170736/330662/14114/107351/16776/381293
GO:1904427	BP	GO:1904427	positive regulation of calcium ion transmembrane transport	44	0.38316	1.42379	0.0157538	0.0637579	0.0436882	1900	tags=41%, list=22%, signal=32%	68312/109676/57440/12288/238276/12298/12293/12297/14810/20191/20617/12313/237611/19055/12289/76055/12315/14062
GO:2000628	BP	GO:2000628	regulation of miRNA metabolic process	48	-0.524259	-1.57947	0.0157724	0.0637892	0.0437097	1624	tags=33%, list=19%, signal=27%	12166/18021/16549/18053/13653/22059/30877/14815/17869/20682/20602/20787/19712/17127/17863/23871
GO:0062197	BP	GO:0062197	cellular response to chemical stress	184	-0.408174	-1.42017	0.0158014	0.063862	0.0437596	1712	tags=28%, list=20%, signal=23%	13205/19261/76251/20466/11350/18810/12043/11545/19766/69051/14297/14782/230784/18053/22166/20909/14088/12387/11692/11669/209027/22059/98363/14056/14375/100604/56449/13852/11920/18024/18477/11677/72565/18854/14362/15368/20528/18214/56458/18760/56349/74041/69922/56615/13361/104156/19712/12578/13605/211651/17279/12192
GO:0043542	BP	GO:0043542	endothelial cell migration	97	-0.440869	-1.44824	0.0158319	0.0639411	0.0438138	1130	tags=25%, list=13%, signal=22%	17886/20683/18186/16002/17260/15289/55982/22339/67784/14314/18024/68328/80837/15368/18760/11600/67916/107831/70097/20778/18128/23871/12767/12822
GO:0031114	BP	GO:0031114	regulation of microtubule depolymerization	30	0.460313	1.58859	0.015866	0.0640346	0.0438778	833	tags=43%, list=10%, signal=39%	23805/20257/67254/69697/17756/17755/99512/260315/11789/17754/14168/208158/76499
GO:0051965	BP	GO:0051965	positive regulation of synapse assembly	42	0.41185	1.51608	0.0158847	0.0640659	0.0438993	1543	tags=43%, list=18%, signal=35%	107065/270190/20450/18212/18189/232370/216856/319387/13844/65945/272381/18708/16981/56637/192167/76965/29819/18750
GO:2000351	BP	GO:2000351	regulation of endothelial cell apoptotic process	19	-0.6573	-1.67531	0.0159179	0.064111	0.0439302	713	tags=32%, list=8%, signal=29%	18024/57875/54409/11600/14456/12822
GO:0034728	BP	GO:0034728	nucleosome organization	57	-0.485109	-1.48477	0.0159138	0.064111	0.0439302	1154	tags=46%, list=13%, signal=40%	12611/19646/93696/20588/12648/53890/56086/66403/59001/101612/114741/20833/53605/217578/18148/231506/50927/66993/20682/108671/107435/67628/27221/17216/110749/66929
GO:2001258	BP	GO:2001258	negative regulation of cation channel activity	24	0.50701	1.6445	0.0159705	0.0642344	0.0440147	1414	tags=38%, list=16%, signal=31%	68312/14226/100503659/11735/69106/14697/12297/12313/19055
GO:0043330	BP	GO:0043330	response to exogenous dsRNA	20	-0.623514	-1.59939	0.0159705	0.0642344	0.0440147	1527	tags=40%, list=18%, signal=33%	67917/56200/76438/17254/74013/78781/225471/214763
GO:0000387	BP	GO:0000387	spliceosomal snRNP assembly	32	-0.571972	-1.61606	0.0160223	0.0643983	0.0441271	2768	tags=75%, list=32%, signal=51%	214572/20630/68988/20595/28000/107686/20643/70465/53890/27374/67332/50783/216766/70767/20638/56844/68011/20641/69878/237221/27756/53975/66603/67242
GO:0044270	BP	GO:0044270	cellular nitrogen compound catabolic process	250	-0.386974	-1.36269	0.0160922	0.0646348	0.0442891	2550	tags=41%, list=29%, signal=30%	11783/213550/68134/60365/70439/22030/74326/19877/66441/67493/53422/14852/74167/76014/20823/22352/110446/15384/56403/26926/71207/70640/109778/73158/71701/13555/110809/230908/192170/28114/14265/232449/22608/21379/17149/242202/19878/72662/15254/50783/67724/14359/51810/15473/210106/69902/19819/78893/239528/66583/230753/11991/52830/17766/140488/225363/16549/11363/66362/53893/27998/230721/68209/67153/1…
GO:0002824	BP	GO:0002824	positive regulation of adaptive immune response based on somatic recombination of immune receptors built from immunoglobulin superfamily domains	38	-0.536703	-1.56355	0.016119	0.0646977	0.0443322	1407	tags=39%, list=16%, signal=33%	66362/17685/15510/71890/18950/11486/17350/55982/14082/51869/237877/12010/15064/77777/18761
GO:0051028	BP	GO:0051028	mRNA transport	90	-0.460161	-1.49056	0.0162173	0.0650477	0.044572	2779	tags=54%, list=32%, signal=37%	53379/15382/19386/13211/13680/108989/60365/20383/227720/66441/72124/73666/53817/110809/71805/192170/107939/28114/14265/208691/17149/229279/69482/223527/103573/66011/140488/16549/234865/237082/225027/69912/226747/59015/445007/103468/170762/21681/227699/72787/223921/18226/56488/170676/54563/20492/69736/140486/12192
GO:1901659	BP	GO:1901659	glycosyl compound biosynthetic process	12	-0.722693	-1.66503	0.0162815	0.0651707	0.0446563	1486	tags=58%, list=17%, signal=48%	68736/15452/18950/11486/11534/21915/66902
GO:0030490	BP	GO:0030490	maturation of SSU-rRNA	45	-0.532239	-1.58308	0.0162617	0.0651707	0.0446563	3407	tags=84%, list=39%, signal=52%	67619/269470/78581/53414/21771/213773/216987/67994/215194/30946/68979/20044/67222/110816/78394/98956/104662/66481/67045/54127/68966/75416/57315/217431/20116/20826/69499/213895/65961/67842/59028/217995/20055/20085/72515/78651/59014/208366
GO:1901879	BP	GO:1901879	regulation of protein depolymerization	61	0.354239	1.41218	0.0162731	0.0651707	0.0446563	1838	tags=43%, list=21%, signal=34%	23805/20257/67254/69697/17756/17755/99512/260315/234695/11789/17754/68732/14168/11519/208158/76499/20740/50876/20742/14026/11518/227634/57028/140810/67886/76707
GO:1904030	BP	GO:1904030	negative regulation of cyclin-dependent protein kinase activity	17	-0.655026	-1.63117	0.0162992	0.0651969	0.0446743	937	tags=41%, list=11%, signal=37%	12580/214444/83383/12577/12575/12578/18817
GO:2001237	BP	GO:2001237	negative regulation of extrinsic apoptotic signaling pathway	48	-0.522132	-1.57306	0.0163258	0.0652586	0.0447165	1712	tags=38%, list=20%, signal=30%	13205/12633/20439/12043/19766/69660/14629/18186/59009/170755/22339/14051/15368/21416/97165/12189/20319/14451
GO:0098771	BP	GO:0098771	inorganic ion homeostasis	231	0.253069	1.30731	0.0163619	0.0653578	0.0447845	2031	tags=34%, list=23%, signal=27%	68312/14812/269615/18799/668940/14226/12721/64051/278279/66168/232975/108058/16485/18795/56506/12176/238871/94249/170770/211401/74772/109676/18751/11735/78506/12288/19165/14806/19122/110891/12709/140919/12298/83704/14810/65113/20191/72828/65945/12652/59049/100126824/80795/54411/20617/64176/12801/12313/11972/19775/72825/14299/11820/170731/17357/11933/14385/71982/72961/18750/20541/111173/13198/1364…
GO:0060348	BP	GO:0060348	bone development	103	-0.448332	-1.4866	0.0166138	0.0662736	0.045412	1259	tags=25%, list=14%, signal=22%	12406/17387/22059/228790/17260/244329/16973/102866/242687/16332/68259/11749/54725/18081/20682/269941/66910/70235/18214/18129/15117/21873/59056/18590/14634/14609
GO:0001708	BP	GO:0001708	cell fate specification	54	-0.510176	-1.55361	0.0167538	0.0667409	0.0457322	1774	tags=46%, list=20%, signal=37%	433759/116870/14182/12166/16911/18996/18992/12387/20672/15376/19207/245688/19206/20682/20664/50913/18213/21380/13388/20674/11921/14633/18128/20319/14634
GO:0006978	BP	GO:0006978	DNA damage response, signal transduction by p53 class mediator resulting in transcription of p21 class mediator	16	-0.657446	-1.60795	0.0168308	0.0669106	0.0458485	1240	tags=50%, list=14%, signal=43%	67071/22059/56190/83383/12575/12190/14235/50883
GO:0046037	BP	GO:0046037	GMP metabolic process	16	-0.656685	-1.60609	0.0168308	0.0669106	0.0458485	1424	tags=62%, list=16%, signal=52%	11564/14450/15452/18950/11486/11534/237823/23918/67054/231327
GO:0099171	BP	GO:0099171	presynaptic modulation of chemical synaptic transmission	28	0.486926	1.6578	0.0168667	0.0670075	0.0459149	1578	tags=61%, list=18%, signal=50%	110834/19339/319924/68404/18191/11444/18751/19157/14806/72194/18645/56637/22249/23821/26431/18750/67808
GO:0060048	BP	GO:0060048	cardiac muscle contraction	57	0.362439	1.42292	0.0168837	0.0670294	0.0459299	998	tags=30%, list=11%, signal=27%	668940/14226/16480/232975/108058/238871/109676/57440/12288/19165/17131/14168/12293/20191/12652/30948/83814
GO:0002686	BP	GO:0002686	negative regulation of leukocyte migration	16	0.570449	1.62617	0.0169909	0.0674091	0.0461901	352	tags=25%, list=4%, signal=24%	23892/17470/18795/20315
GO:0006084	BP	GO:0006084	acetyl-CoA metabolic process	22	0.538665	1.68066	0.0171671	0.0678774	0.046511	1976	tags=45%, list=23%, signal=35%	192156/208715/60525/68603/17855/14104/64451/70456/106564/55951
GO:0002903	BP	GO:0002903	negative regulation of B cell apoptotic process	10	-0.746181	-1.64672	0.0171352	0.0678774	0.046511	1584	tags=60%, list=18%, signal=49%	57741/12043/17319/11486/12505/20877
GO:0045686	BP	GO:0045686	negative regulation of glial cell differentiation	17	-0.653807	-1.62813	0.0171628	0.0678774	0.046511	1214	tags=41%, list=14%, signal=35%	12387/107503/103743/18213/15208/18128/15205
GO:0071425	BP	GO:0071425	hematopoietic stem cell proliferation	17	-0.653253	-1.62676	0.0171628	0.0678774	0.046511	457	tags=47%, list=5%, signal=45%	217127/53890/22596/14011/18712/12190/17311/20319
GO:0010463	BP	GO:0010463	mesenchymal cell proliferation	27	-0.604313	-1.64413	0.0172857	0.0681939	0.0467279	2074	tags=56%, list=24%, signal=42%	21417/18109/319757/14182/12166/114142/12387/15289/16367/17869/20682/21380/18590/14451/14734
GO:0061005	BP	GO:0061005	cell differentiation involved in kidney development	27	-0.603708	-1.64248	0.0172857	0.0681939	0.0467279	1243	tags=52%, list=14%, signal=45%	243931/12387/228790/17260/19206/19126/12705/58198/18129/16449/18128/14634/22417/15205
GO:0030901	BP	GO:0030901	midbrain development	22	-0.616761	-1.61297	0.0172939	0.0681939	0.0467279	755	tags=36%, list=9%, signal=33%	14182/56207/12387/20377/68151/20319/18742/15205
GO:0033599	BP	GO:0033599	regulation of mammary gland epithelial cell proliferation	15	-0.699003	-1.67526	0.0173409	0.0683331	0.0468232	438	tags=27%, list=5%, signal=25%	12190/12578/12443/404710
GO:0097191	BP	GO:0097191	extrinsic apoptotic signaling pathway	118	-0.425772	-1.43518	0.0173728	0.0683664	0.0468461	1712	tags=31%, list=20%, signal=25%	13205/14182/12633/27279/20439/12043/19766/69660/14629/12018/20909/18186/59009/26885/51800/11546/83925/14082/170755/57913/22339/20377/14051/75736/30954/18854/11910/15368/17311/21416/12369/17127/97165/12189/20319/14451
GO:1903169	BP	GO:1903169	regulation of calcium ion transmembrane transport	88	0.307682	1.37932	0.0173693	0.0683664	0.0468461	1595	tags=35%, list=18%, signal=29%	68312/12295/14226/12721/108058/100503659/238871/109676/57440/12288/19165/19122/238276/12298/14697/12293/12297/14810/20191/72828/30948/66109/14360/20617/12313/237611/225055/19055/12289/20541/76055
GO:0140056	BP	GO:0140056	organelle localization by membrane tethering	60	0.366346	1.46099	0.0173953	0.0684091	0.0468753	2661	tags=57%, list=31%, signal=40%	19339/234593/20979/116837/56216/53331/22318/14681/20910/67295/19165/76787/19340/75914/22249/12313/102058/382018/67808/64143/17967/67474/217893/100504663/53413/56041/56491/56389/228545/56418/55943/105504/211446/100226
GO:0031099	BP	GO:0031099	regeneration	77	-0.469318	-1.48967	0.0174832	0.0687082	0.0470803	1106	tags=34%, list=13%, signal=30%	12633/76893/63953/18007/12043/16438/11692/14056/17242/19716/65079/14580/18081/15368/18213/12575/19221/13361/12608/244058/20878/14632/12443/12534/17927/14609
GO:0050865	BP	GO:0050865	regulation of cell activation	238	-0.386417	-1.3572	0.0176428	0.0692889	0.0474781	1364	tags=24%, list=16%, signal=21%	17319/17685/14357/20535/14629/15510/71890/20909/17387/12387/18950/59009/14375/16002/17242/11486/17260/15289/17350/72057/11534/55982/16852/14082/230899/20377/12400/22038/11920/51869/66993/12144/11987/15368/12575/18214/14268/12193/237877/12010/17311/14456/12608/225471/12578/14087/12505/18590/214763/109594/17863/14634/211651/77777/18761/15205/12192
GO:0048002	BP	GO:0048002	antigen processing and presentation of peptide antigen	11	-0.72243	-1.63934	0.017662	0.0693177	0.0474979	389	tags=27%, list=4%, signal=26%	12010/15064/77777
GO:0051968	BP	GO:0051968	positive regulation of synaptic transmission, glutamatergic	22	0.536555	1.67408	0.0177164	0.0694845	0.0476122	1646	tags=59%, list=19%, signal=48%	14812/18212/14802/18189/58234/20910/216856/81905/14810/19699/192167/54377/13649
GO:1903320	BP	GO:1903320	regulation of protein modification by small protein conjugation or removal	162	-0.40444	-1.39422	0.0178084	0.0697985	0.0478274	1372	tags=19%, list=16%, signal=16%	16898/104806/14629/71890/12387/13653/73945/12237/213539/56459/30877/77891/55982/18148/12257/105837/27401/11600/107831/67121/56150/70097/327799/12578/12189/208836/107995/67141/18817/12236/11799
GO:0045840	BP	GO:0045840	positive regulation of mitotic nuclear division	18	-0.637479	-1.60029	0.0178716	0.069952	0.0479325	1052	tags=28%, list=12%, signal=24%	16002/18226/67177/229841/108907
GO:0051496	BP	GO:0051496	positive regulation of stress fiber assembly	31	-0.571577	-1.60377	0.0179568	0.0701916	0.0480967	564	tags=23%, list=6%, signal=21%	11853/234094/234686/17127/30794/22417/18761
GO:0016081	BP	GO:0016081	synaptic vesicle docking	10	0.664018	1.68681	0.0180543	0.0705252	0.0483254	1578	tags=70%, list=18%, signal=57%	116837/56216/22318/76787/22249/382018/67808
GO:0048593	BP	GO:0048593	camera-type eye morphogenesis	75	-0.477402	-1.51044	0.0183351	0.0714309	0.0489459	1293	tags=31%, list=15%, signal=26%	12018/20683/236266/12387/269831/54352/14107/22339/19126/58235/20682/20664/18129/16449/13388/20674/12677/20681/270120/18128/19662/14634/18742
GO:0060537	BP	GO:0060537	muscle tissue development	220	-0.390063	-1.36411	0.0184067	0.071662	0.0491043	1243	tags=20%, list=14%, signal=18%	243931/12387/13653/232334/60406/11546/16002/17260/15213/56449/14615/286940/106628/14082/22339/22634/14815/225115/17869/20682/11910/13654/14733/13008/18712/11600/117606/21380/23828/56312/13388/21416/20681/20181/17127/18128/14632/13717/19662/268697/12534/17927/108000/14609
GO:0072583	BP	GO:0072583	clathrin-dependent endocytosis	39	0.39809	1.44203	0.018443	0.0717556	0.0491684	2965	tags=69%, list=34%, signal=46%	20616/73094/16443/72685/100503185/20404/229521/22248/68421/214459/71770/74015/54609/213326/269774/101490/13430/11773/11772/277463/227333/67300/20408/12757/29816/233489/50791
GO:0042558	BP	GO:0042558	pteridine-containing compound metabolic process	22	-0.61472	-1.60763	0.0185218	0.0718228	0.0492145	1696	tags=55%, list=20%, signal=44%	216188/210009/14287/14450/108037/72562/20751/108156/17768/13361/22171/20425
GO:0099072	BP	GO:0099072	regulation of postsynaptic membrane neurotransmitter receptor levels	90	0.319426	1.43002	0.0185177	0.0718228	0.0492145	1693	tags=39%, list=19%, signal=32%	665113/53627/13869/18762/26414/103967/56216/23969/18191/18196/22318/238276/81905/26422/12889/545156/216831/94190/13642/65945/18163/104015/56637/236794/18717/13385/18693/20614/53310/11496/54377/11487/23859/67979/71770
GO:0031623	BP	GO:0031623	receptor internalization	88	0.306518	1.3741	0.0185177	0.0718228	0.0492145	1923	tags=42%, list=22%, signal=33%	23892/21367/107065/100102/103967/23969/109689/20404/14251/238276/81905/17957/94190/13642/16971/104015/20617/18717/13385/18693/53378/20614/16976/14784/11820/14800/68420/54377/13429/268445/64143/67979/71770/54609/213326/56044/75659
GO:0051865	BP	GO:0051865	protein autoubiquitination	48	-0.516635	-1.5565	0.0185395	0.0718435	0.0492287	532	tags=21%, list=6%, signal=20%	76892/59009/58186/12190/67196/70097/19361/12021/12189/18140
GO:0060831	BP	GO:0060831	smoothened signaling pathway involved in dorsal/ventral neural tube patterning	11	-0.719612	-1.63294	0.0185855	0.0719741	0.0493181	212	tags=36%, list=2%, signal=36%	380718/81896/14633/14634
GO:0002062	BP	GO:0002062	chondrocyte differentiation	49	-0.51209	-1.54773	0.018632	0.0721065	0.0494089	1259	tags=33%, list=14%, signal=28%	12406/12387/106522/17242/17260/83925/68259/11749/20682/269941/70235/26564/14633/17127/20319/14634
GO:0045619	BP	GO:0045619	regulation of lymphocyte differentiation	78	-0.465814	-1.48018	0.0187278	0.0723985	0.0496089	1702	tags=33%, list=20%, signal=27%	26992/56456/268564/63953/11350/14357/20535/17387/18950/59009/14375/17242/11486/15289/72057/20377/12400/66993/12193/14456/12578/14087/12505/14634/211651/12192
GO:0061448	BP	GO:0061448	connective tissue development	117	-0.422831	-1.42278	0.0187323	0.0723985	0.0496089	1259	tags=23%, list=14%, signal=20%	12406/20660/12387/13653/13592/106522/17242/17260/15376/83925/16973/55982/68259/320910/11749/20682/269941/70235/26564/20681/14633/17127/15208/18128/20319/14634/16007
GO:0010955	BP	GO:0010955	negative regulation of protein processing	12	-0.71928	-1.65716	0.0187863	0.0725112	0.0496862	653	tags=33%, list=8%, signal=31%	75736/103743/69065/14451
GO:1903318	BP	GO:1903318	negative regulation of protein maturation	12	-0.71928	-1.65716	0.0187863	0.0725112	0.0496862	653	tags=33%, list=8%, signal=31%	75736/103743/69065/14451
GO:0021846	BP	GO:0021846	cell proliferation in forebrain	24	-0.602706	-1.59655	0.0188538	0.0727234	0.0498316	558	tags=25%, list=6%, signal=23%	20602/140486/100182/21335/14634/381293
GO:0006188	BP	GO:0006188	IMP biosynthetic process	11	-0.718892	-1.63131	0.0190472	0.0734212	0.0503097	1424	tags=73%, list=16%, signal=61%	11564/14450/15452/18950/11486/237823/67054/231327
GO:0043244	BP	GO:0043244	regulation of protein-containing complex disassembly	82	0.323713	1.42219	0.0190831	0.0735107	0.0503711	1893	tags=38%, list=22%, signal=30%	23805/20257/67254/69697/17756/17755/12176/99512/260315/234695/11789/17754/68732/14168/70381/11519/208158/76499/20740/50876/20742/14026/11518/74374/227634/76055/57028/140810/67886/76707/67526
GO:0061013	BP	GO:0061013	regulation of mRNA catabolic process	113	-0.42764	-1.43359	0.0192037	0.0739267	0.0506561	2962	tags=56%, list=34%, signal=37%	268420/217980/233908/231464/236732/75553/225929/214627/11792/234594/228994/13211/15381/60365/70439/22030/74326/19877/67493/53422/22352/15384/56403/70640/73158/71701/13555/110809/230908/192170/14265/22608/21379/17149/19878/14359/51810/15473/210106/239528/230753/11991/140488/16549/66362/27998/230721/18458/66446/69639/17350/69305/56190/18148/227715/22339/19205/140486/78781/12193/74480/11810/12192
GO:0031507	BP	GO:0031507	heterochromatin formation	79	-0.461403	-1.47222	0.0192708	0.0740386	0.0507328	1949	tags=35%, list=22%, signal=28%	12417/13018/223828/13435/21849/433759/73139/20466/74355/59001/13626/331623/666704/14056/52615/15289/20937/217578/16906/16907/51869/13433/12577/107435/218973/15201/11810/12566
GO:0002790	BP	GO:0002790	peptide secretion	152	0.274768	1.32196	0.0192643	0.0740386	0.0507328	1679	tags=36%, list=19%, signal=30%	14226/19339/18012/17932/19275/16443/18795/207227/224129/109689/16522/109305/26875/18642/75770/268860/18751/93691/14681/12361/68267/216856/12288/58994/19276/12290/14761/18575/54393/18111/12889/545156/276952/16971/12876/15357/12652/14682/228355/14687/12801/18693/20614/18508/20677/19055/71764/78894/12289/76055/54126/23830/13649/60510/277978
GO:0030072	BP	GO:0030072	peptide hormone secretion	152	0.274768	1.32196	0.0192643	0.0740386	0.0507328	1679	tags=36%, list=19%, signal=30%	14226/19339/18012/17932/19275/16443/18795/207227/224129/109689/16522/109305/26875/18642/75770/268860/18751/93691/14681/12361/68267/216856/12288/58994/19276/12290/14761/18575/54393/18111/12889/545156/276952/16971/12876/15357/12652/14682/228355/14687/12801/18693/20614/18508/20677/19055/71764/78894/12289/76055/54126/23830/13649/60510/277978
GO:1903313	BP	GO:1903313	positive regulation of mRNA metabolic process	94	-0.438726	-1.43036	0.0193059	0.0741247	0.0507918	2183	tags=39%, list=25%, signal=30%	70465/70640/71701/230908/192170/22608/27374/20462/19878/51810/15473/210106/239528/19656/68219/230753/11991/11758/16549/66362/19652/27998/652988/17975/18458/66446/69639/17350/69305/227715/140486/78781/12193/74480/11810/268697/12192
GO:0042771	BP	GO:0042771	intrinsic apoptotic signaling pathway in response to DNA damage by p53 class mediator	29	-0.582868	-1.60095	0.0193335	0.0741818	0.0508309	1364	tags=41%, list=16%, signal=35%	17319/17685/22059/68539/75736/18854/12575/237877/12190/56312/12505/50883
GO:0019432	BP	GO:0019432	triglyceride biosynthetic process	22	-0.613292	-1.6039	0.0195451	0.0748271	0.0512731	762	tags=27%, list=9%, signal=25%	64898/74551/20787/20778/21416/16956
[truncated: 1,587 more rows]
