# Supplementary material for: PTEN restrains SHH medulloblastoma growth through cell autonomous and nonautonomous mechanisms
Source: eLife. 2026 Apr 17;14:RP108190. doi: 10.7554/eLife.108190 (PMC13090030; doi:10.7554/eLife.108190)
Supplement: Figure 9—figure supplement 1—source data 4. — Related to Figure 9—figure supplement 1D. [file elife-108190-fig9-figsupp1-data4.xlsx]

## Sheet: Figure 9-Supp 1-source data 4
Figure 9-Supplemental 1-source data 4. scRNA-seq differential gene expression analysis of macrophages in SmoM2; Ptenfl/fl compared with SmoM2 tumors. Related to Figure 9-Supplemental 1D.
gene	p_val	avg_log2FC	pct.1	pct.2	p_val_adj
Rps2	1.09833e-11	1.51438	0.949	0.805	2.34669e-07
Angptl4	2.8422e-11	5.08346	0.205	0.004	6.07264e-07
Gpnmb	3.12161e-11	5.14201	0.205	0.004	6.66962e-07
Malat1	8.571e-11	-1.525	1	0.992	1.83128e-06
Rbm3	9.18542e-11	1.62841	0.923	0.593	1.96256e-06
AY036118	1.05234e-10	-1.3765	0.949	0.951	2.24843e-06
Myof	1.07022e-10	3.16548	0.308	0.028	2.28664e-06
Smim8	2.1444e-10	1.73874	0.436	0.069	4.58173e-06
Gm42418	3.84521e-10	-1.07703	1	0.992	8.21567e-06
mt-Co2	4.1653e-10	1.02452	1	0.967	8.89958e-06
Cela1	4.67905e-10	3.29196	0.231	0.012	9.99727e-06
Nme2	1.0256e-09	1.24697	0.949	0.675	2.1913e-05
Lgals1	1.3945e-09	1.95186	0.692	0.256	2.97949e-05
mt-Co3	1.76838e-09	1.04416	1	0.955	3.77832e-05
Cfl1	3.57465e-09	0.956281	1	0.85	7.63761e-05
Prdx1	5.55701e-09	1.5861	0.923	0.569	0.000118731
Spp1	6.22413e-09	3.22257	0.538	0.142	0.000132985
Hbb-bs	7.20568e-09	-7.04954	0	0.528	0.000153957
Fen1	7.82606e-09	2.31629	0.359	0.057	0.000167212
Hnrnpab	8.02264e-09	1.30591	0.923	0.484	0.000171412
AA467197	1.59516e-08	6.18042	0.128	0	0.000340822
Tonsl	1.59516e-08	4.93004	0.128	0	0.000340822
Tmsb4x	1.77302e-08	1.01899	1	1	0.000378823
Phlda3	1.8709e-08	6.86873	0.154	0.004	0.000399737
Ptrhd1	2.18837e-08	2.4554	0.41	0.081	0.000467568
Rapsn	2.34325e-08	4.55992	0.154	0.004	0.00050066
Zmynd15	2.34325e-08	4.81068	0.154	0.004	0.00050066
Ftl1-ps1	2.86809e-08	2.08199	0.41	0.081	0.000612796
Bst2	2.88034e-08	2.24161	0.692	0.293	0.000615413
mt-Atp6	3.08373e-08	0.979843	1	0.984	0.00065887
Taf10	3.38893e-08	1.57643	0.769	0.39	0.000724079
Eef1g	4.08604e-08	1.40438	0.872	0.533	0.000873023
Lgals3	4.31313e-08	1.79956	0.564	0.163	0.000921543
Mrpl12	4.85902e-08	1.26505	0.641	0.207	0.00103818
Gm43305	7.12113e-08	3.10829	0.205	0.016	0.0015215
Gabarap	7.71369e-08	1.16376	0.949	0.65	0.00164811
Syce2	9.3179e-08	3.38456	0.256	0.033	0.00199086
Cmc2	1.34252e-07	2.21203	0.385	0.081	0.00286843
Ndufb5	1.44837e-07	1.07868	0.897	0.533	0.00309458
Grwd1	1.56024e-07	2.65881	0.256	0.033	0.0033336
Plin2	1.87334e-07	2.73591	0.641	0.285	0.00400257
Cdc34	1.87362e-07	1.40231	0.436	0.102	0.00400318
Rcc1l	1.88246e-07	2.24624	0.256	0.033	0.00402207
Pfn1	2.39442e-07	0.778058	0.949	0.805	0.00511593
Itgal	2.46959e-07	1.81265	0.436	0.106	0.00527652
Ftl1	2.83619e-07	1.44846	1	0.915	0.00605981
Tyms	3.02733e-07	1.9342	0.385	0.085	0.00646819
Clspn	3.25867e-07	1.71623	0.205	0.02	0.00696247
Mxd3	3.56958e-07	2.46515	0.154	0.008	0.00762677
Cenpl	4.16337e-07	2.76203	0.231	0.028	0.00889546
Nr1h3	4.54764e-07	5.52913	0.103	0	0.00971649
BC030867	4.54764e-07	5.34635	0.103	0	0.00971649
Ropn1l	4.54764e-07	4.47043	0.103	0	0.00971649
Dach2	4.54764e-07	5.47183	0.103	0	0.00971649
Rpl15	5.68012e-07	0.944975	0.949	0.89	0.0121361
Gpx3	5.82119e-07	2.08368	0.308	0.057	0.0124376
Fabp5	6.1772e-07	1.94427	0.667	0.289	0.0131982
Vps29	7.09392e-07	1.46344	0.718	0.337	0.0151569
Mrpl34	7.60511e-07	1.5329	0.667	0.268	0.0162491
Msrb1	7.62213e-07	0.48103	0.513	0.167	0.0162855
Rpl21	7.78799e-07	0.842771	0.974	0.894	0.0166398
Mrpl28	8.12311e-07	1.40082	0.59	0.215	0.0173558
Nhp2	8.5611e-07	1.28632	0.615	0.232	0.0182916
Dcaf1	9.12485e-07	1.65049	0.333	0.069	0.0194962
Cdca7l	9.72809e-07	3.32563	0.179	0.016	0.020785
Tex30	9.73918e-07	1.05762	0.359	0.077	0.0208087
Mrpl55	9.73918e-07	1.62162	0.359	0.077	0.0208087
Spdl1	1.0043e-06	2.51128	0.179	0.016	0.0214579
Svbp	1.09705e-06	1.54444	0.615	0.228	0.0234395
Palld	1.13536e-06	3.38635	0.205	0.024	0.0242582
Ccne1	1.30707e-06	3.10326	0.205	0.024	0.0279268
Mmp14	1.34903e-06	2.23309	0.231	0.033	0.0288234
Eif5a	1.3536e-06	1.1302	0.872	0.618	0.0289211
Rpl32	1.40288e-06	0.863537	1	0.911	0.0299739
Cd36	1.49668e-06	2.50307	0.308	0.061	0.031978
Gm1673	1.67546e-06	1.37874	0.564	0.199	0.0357978
Tmem126a	1.68672e-06	1.37103	0.564	0.195	0.0360384
Pmf1	1.78225e-06	1.62101	0.333	0.073	0.0380796
Hspa14	1.91762e-06	1.34008	0.436	0.118	0.0409718
Mtap	1.95356e-06	1.77924	0.308	0.061	0.0417398
Mrpl54	1.9922e-06	1.39291	0.59	0.224	0.0425654
Cyp4f18	2.02539e-06	2.15415	0.231	0.033	0.0432745
Mrpl15	2.06766e-06	0.960397	0.641	0.224	0.0441777
Kif16b	2.07705e-06	1.78246	0.231	0.033	0.0443782
Slc39a11	2.33911e-06	4.67217	0.154	0.012	0.0499775
Slc25a5	2.34521e-06	0.77988	0.949	0.679	0.0501077
Grin2b	2.67833e-06	3.75893	0.154	0.012	0.0572252
Ipo5	2.9332e-06	1.01823	0.513	0.154	0.0626707
Hint1	2.94562e-06	0.851206	0.923	0.703	0.062936
Rpl18	3.22498e-06	0.700293	0.974	0.923	0.068905
Brix1	3.29025e-06	1.34055	0.41	0.106	0.0702995
Rab32	3.63059e-06	2.05918	0.333	0.081	0.0775711
Galk2	3.93826e-06	1.86316	0.333	0.077	0.0841448
Prkag1	4.15231e-06	2.27077	0.385	0.106	0.0887182
Mdfic	4.38144e-06	2.09425	0.282	0.057	0.0936138
Commd9	4.38722e-06	1.67165	0.41	0.122	0.0937372
Anxa5	4.52624e-06	1.50322	0.615	0.26	0.0967076
Apoc1	4.56353e-06	2.00106	0.308	0.069	0.0975044
Hells	4.58417e-06	3.38477	0.205	0.028	0.0979454
Timeless	4.70418e-06	2.91721	0.205	0.028	0.100509
Rps12	4.86459e-06	0.830835	0.974	0.874	0.103937
Nudcd2	4.87719e-06	1.63287	0.513	0.179	0.104206
Mcm3	4.95293e-06	2.07798	0.41	0.118	0.105824
Mrpl11	5.34062e-06	1.40924	0.538	0.187	0.114108
Txnl4a	5.40688e-06	1.94183	0.513	0.187	0.115523
Lxn	5.51815e-06	1.12774	0.282	0.053	0.117901
Gng12	5.93007e-06	1.23657	0.462	0.138	0.126702
Uhrf1	5.9365e-06	2.45562	0.179	0.02	0.126839
Odc1	5.96972e-06	0.950699	0.564	0.199	0.127549
Itgam	6.1027e-06	-3.26036	0.231	0.553	0.13039
Tmem106a	6.31085e-06	1.81906	0.282	0.057	0.134838
Tmem205	6.31925e-06	1.30595	0.333	0.077	0.135017
Atp5g2	6.34723e-06	0.808108	0.897	0.699	0.135615
Wwc1	6.4193e-06	4.42749	0.128	0.008	0.137155
Aprt	6.46947e-06	1.15758	0.769	0.362	0.138227
Mest	6.90854e-06	4.29726	0.128	0.008	0.147608
Ms4a7	7.23654e-06	2.4388	0.359	0.098	0.154616
Ero1l	7.43201e-06	1.36798	0.333	0.081	0.158792
Pi4kb	7.45462e-06	1.38232	0.308	0.069	0.159275
Lap3	7.78053e-06	1.54675	0.615	0.272	0.166239
St3gal6	7.92001e-06	-4.98243	0.026	0.394	0.169219
Tlcd2	7.99609e-06	2.75931	0.128	0.008	0.170844
Prr11	7.99609e-06	2.85564	0.128	0.008	0.170844
Spats2l	8.29253e-06	2.90537	0.128	0.008	0.177178
Zranb3	8.29253e-06	1.82783	0.128	0.008	0.177178
Chek1	8.29253e-06	1.9908	0.128	0.008	0.177178
Hs3st5	8.29253e-06	2.99356	0.128	0.008	0.177178
Cebpzos	8.45352e-06	1.57601	0.538	0.211	0.180618
Ube2j2	8.62903e-06	1.47776	0.513	0.171	0.184368
mt-Co1	9.22753e-06	0.700884	1	0.98	0.197155
Dctn3	9.30963e-06	0.916712	0.692	0.305	0.19891
Snapc5	9.32942e-06	1.41348	0.41	0.122	0.199332
Tomm20	9.39867e-06	0.940904	0.846	0.602	0.200812
Rpl19	1.01404e-05	0.786659	1	0.927	0.216661
Ssh2	1.04448e-05	-1.97222	0.359	0.65	0.223163
Psmb3	1.09217e-05	0.973007	0.769	0.419	0.233352
Zfand2a	1.10954e-05	1.46432	0.256	0.049	0.237064
Psmb4	1.1122e-05	0.947587	0.821	0.443	0.237632
Dera	1.1209e-05	1.60632	0.436	0.138	0.239492
Ruvbl2	1.13241e-05	0.90818	0.436	0.126	0.24195
Selplg	1.18182e-05	-2.38254	0.462	0.683	0.252509
Psmb6	1.24321e-05	0.856063	0.846	0.516	0.265623
Rplp0	1.29093e-05	0.799026	0.974	0.943	0.275821
Kyat3	1.30374e-05	4.49573	0.077	0	0.278556
Gm13012	1.30374e-05	4.56204	0.077	0	0.278556
Klhl40	1.30374e-05	4.7663	0.077	0	0.278556
Arg1	1.30374e-05	5.17812	0.077	0	0.278556
Armc2	1.30374e-05	4.67078	0.077	0	0.278556
Pgf	1.30374e-05	4.85759	0.077	0	0.278556
Cfb	1.30374e-05	4.71303	0.077	0	0.278556
Frmpd3	1.30374e-05	4.39934	0.077	0	0.278556
Serpinf2	1.30374e-05	5.09072	0.077	0	0.278556
Fpr1	1.30374e-05	6.96971	0.077	0	0.278556
Asf1b	1.33897e-05	2.73635	0.205	0.033	0.286085
Mri1	1.34728e-05	2.53578	0.256	0.053	0.287859
Rpl10a	1.35245e-05	0.864314	0.949	0.858	0.288964
Kntc1	1.42122e-05	4.23642	0.103	0.004	0.303657
Lig4	1.42122e-05	4.70947	0.103	0.004	0.303657
Sparc	1.43717e-05	-1.76426	0.231	0.606	0.307066
Vcam1	1.45371e-05	2.38312	0.179	0.024	0.3106
Ptrh1	1.4819e-05	3.79157	0.103	0.004	0.316623
Rps6ka2	1.4819e-05	3.95418	0.103	0.004	0.316623
Bach2os	1.54505e-05	2.39137	0.103	0.004	0.330116
Cdkn2a	1.54505e-05	2.56653	0.103	0.004	0.330116
Adat2	1.54505e-05	3.38718	0.103	0.004	0.330116
A630089N07Rik	1.54505e-05	3.60842	0.103	0.004	0.330116
Ints9	1.55054e-05	2.10916	0.231	0.041	0.331288
Lsm2	1.64089e-05	1.36269	0.538	0.211	0.350593
Mcm2	1.6589e-05	2.06143	0.205	0.033	0.354441
Pf4	1.68712e-05	-1.04344	0.359	0.085	0.360469
Cenpq	1.72466e-05	1.39264	0.282	0.061	0.368491
Cenpw	1.72968e-05	1.74081	0.231	0.041	0.369564
Rpl8	1.79152e-05	0.615577	1	0.902	0.382777
Rad51ap1	1.79228e-05	2.50958	0.179	0.024	0.382939
Chmp2a	1.80156e-05	1.14482	0.744	0.358	0.384921
Gbp3	1.83954e-05	2.66318	0.179	0.024	0.393037
Ctxn1	1.83954e-05	2.53102	0.179	0.024	0.393037
Trim37	1.84765e-05	1.88881	0.333	0.089	0.394769
Slc39a6	1.85997e-05	2.09637	0.359	0.102	0.397402
Psat1	1.88985e-05	1.34084	0.308	0.073	0.403785
Mcm5	1.93219e-05	1.8691	0.256	0.053	0.412831
Creld2	1.94872e-05	1.32484	0.359	0.098	0.416364
Elof1	2.04662e-05	0.999799	0.513	0.187	0.437281
Scd2	2.07905e-05	1.03819	0.538	0.199	0.444209
Arl11	2.10682e-05	1.54848	0.385	0.114	0.450144
Gins2	2.176e-05	1.33867	0.256	0.053	0.464925
Gga2	2.21352e-05	1.40409	0.308	0.073	0.472941
Myd88	2.22961e-05	1.23961	0.333	0.085	0.476379
Dpy30	2.28462e-05	1.43079	0.487	0.183	0.488132
Rpl3	2.28689e-05	0.789113	0.974	0.911	0.488618
Ap2s1	2.55892e-05	1.13109	0.667	0.321	0.546739
Vsir	2.58798e-05	-2.36712	0.359	0.622	0.552948
Ifi207	2.6904e-05	1.70455	0.308	0.077	0.574831
Akr1b3	2.71491e-05	1.41741	0.564	0.244	0.580067
Tars	2.78275e-05	1.17444	0.41	0.122	0.594563
Rnaseh2b	2.81306e-05	1.75929	0.282	0.065	0.601038
Hscb	2.82317e-05	2.13787	0.359	0.11	0.603199
Gtpbp4	2.91378e-05	1.3403	0.564	0.248	0.622558
Psmd10	3.01287e-05	1.54305	0.385	0.118	0.643729
Ran	3.12272e-05	1.23773	0.821	0.557	0.667201
Tpt1	3.17595e-05	0.637204	0.974	0.915	0.678573
Selenoh	3.17895e-05	0.983937	0.615	0.272	0.679214
Rpl11	3.24063e-05	0.673136	1	0.894	0.692394
Mki67	3.28199e-05	2.01259	0.308	0.081	0.70123
Pcna	3.38733e-05	1.2994	0.641	0.301	0.723738
Serf1	3.40634e-05	0.57896	0.385	0.106	0.727798
Dtd2	3.41021e-05	1.27493	0.256	0.053	0.728625
Rpl12	3.47774e-05	0.976338	0.872	0.728	0.743054
Pclaf	3.65159e-05	1.54409	0.333	0.089	0.780198
Ndufb6	3.76915e-05	1.28315	0.59	0.232	0.805317
Iqgap1	4.06259e-05	1.10688	0.641	0.301	0.868013
Gm8797	4.06539e-05	0.736589	0.897	0.5	0.868611
Pus10	4.10852e-05	1.96563	0.205	0.037	0.877826
Gipc1	4.27105e-05	1.57847	0.436	0.159	0.912553
Dnajc9	4.35229e-05	1.10554	0.436	0.142	0.92991
Rps11	4.53693e-05	0.609964	1	0.898	0.96936
Serpinb6a	4.55275e-05	1.92858	0.385	0.122	0.97274
Eif3l	4.56743e-05	1.19405	0.564	0.256	0.975877
Coq8b	4.73353e-05	1.08761	0.231	0.045	1
Snhg16	4.73353e-05	0.934098	0.231	0.045	1
Slc27a1	4.77405e-05	1.75343	0.256	0.057	1
Sytl2	4.90635e-05	3.79211	0.128	0.012	1
Ulbp1	4.90635e-05	3.14498	0.128	0.012	1
Kifc1	4.90635e-05	2.6206	0.128	0.012	1
Rps14	4.91242e-05	0.63199	0.949	0.866	1
Ftsj3	4.95573e-05	1.38775	0.385	0.122	1
Cotl1	5.0586e-05	1.15564	0.744	0.537	1
Chchd5	5.09e-05	0.845153	0.333	0.089	1
Cstb	5.23896e-05	1.79456	0.641	0.346	1
Sh3bgrl3	5.27425e-05	1.10989	0.795	0.598	1
Hadha	5.30507e-05	1.5284	0.564	0.24	1
Gsn	5.33138e-05	1.86648	0.333	0.102	1
Trnau1ap	5.38507e-05	0.79461	0.436	0.142	1
Eepd1	5.40877e-05	1.74243	0.333	0.098	1
Ppp1r14c	5.45913e-05	1.45533	0.282	0.069	1
Afmid	5.55853e-05	0.916753	0.128	0.012	1
Ccna2	5.57854e-05	1.91606	0.205	0.037	1
Ncaph2	5.63832e-05	1.60458	0.333	0.093	1
Mrpl39	5.72582e-05	1.44687	0.333	0.093	1
Parpbp	5.73396e-05	2.3141	0.128	0.012	1
Zwilch	5.74808e-05	2.97934	0.154	0.02	1
Krt10	5.84328e-05	2.86626	0.231	0.049	1
Prelid3b	5.84828e-05	1.41333	0.282	0.069	1
Vamp8	5.86352e-05	0.976868	0.795	0.496	1
Rangap1	5.88352e-05	0.729902	0.462	0.159	1
Cybb	5.88815e-05	1.56	0.487	0.203	1
Morrbid	5.90301e-05	3.25984	0.154	0.02	1
Nectin3	5.95884e-05	2.60241	0.231	0.049	1
Sdr39u1	6.10068e-05	1.42792	0.128	0.012	1
Snx3	6.13908e-05	1.02944	0.795	0.459	1
Dcaf13	6.20947e-05	1.06455	0.359	0.106	1
Psmb5	6.29566e-05	0.848736	0.744	0.407	1
Racgap1	6.56982e-05	1.65254	0.231	0.049	1
Lpl	6.63793e-05	1.39411	0.308	0.081	1
Chaf1b	6.73882e-05	2.70536	0.154	0.02	1
Gapdh	6.7595e-05	0.734475	0.923	0.789	1
Blvra	6.77606e-05	1.73638	0.41	0.142	1
Sf3a1	6.79794e-05	1.40051	0.462	0.171	1
Arpc3	6.89142e-05	0.814096	0.923	0.687	1
Sec61b	6.89685e-05	0.964198	0.821	0.545	1
Tbca	6.93301e-05	0.832567	0.846	0.488	1
Atp6v1g1	6.96656e-05	1.03822	0.897	0.634	1
Pdk3	7.00704e-05	2.51622	0.282	0.073	1
Wdhd1	7.29281e-05	1.32343	0.154	0.02	1
Dcp1a	7.43362e-05	1.78942	0.179	0.028	1
Tuba1c	7.53092e-05	1.00306	0.385	0.122	1
Rps7	7.54103e-05	0.8023	0.974	0.89	1
Bloc1s2	7.55257e-05	0.812129	0.487	0.179	1
Plk4	7.60946e-05	1.11948	0.179	0.028	1
Fuca2	7.67088e-05	1.07531	0.538	0.211	1
Mrps7	7.81258e-05	1.64853	0.436	0.163	1
Psmg3	7.89038e-05	1.76008	0.333	0.098	1
Lrrc59	7.9583e-05	1.2811	0.487	0.187	1
Miat	8.0655e-05	1.82523	0.256	0.061	1
Rps5	8.21216e-05	0.76089	0.974	0.902	1
Axin1	8.22095e-05	1.39488	0.282	0.069	1
Atp6v0c	8.30837e-05	1.02146	0.974	0.76	1
C2cd3	8.37954e-05	1.72153	0.308	0.085	1
Mef2a	8.45158e-05	-1.80988	0.41	0.65	1
0610009B22Rik	8.68913e-05	1.03901	0.41	0.142	1
Clptm1l	8.72871e-05	0.959578	0.564	0.228	1
Axl	8.81531e-05	1.97432	0.308	0.089	1
Diablo	9.21031e-05	1.29682	0.41	0.138	1
Ccng1	9.23209e-05	2.07819	0.308	0.089	1
Polr2j	9.40921e-05	0.584016	0.744	0.341	1
Thop1	9.4582e-05	1.62945	0.256	0.061	1
Tubg1	9.60686e-05	1.52036	0.282	0.073	1
Dnajc19	9.65427e-05	0.878412	0.667	0.305	1
Rpl17	9.74344e-05	0.750444	0.897	0.829	1
Sh3pxd2b	9.76627e-05	1.66805	0.282	0.073	1
Elovl6	9.77305e-05	2.07065	0.205	0.041	1
Phc1	9.77305e-05	2.00787	0.205	0.041	1
Mbnl1	0.000103309	-1.51453	0.641	0.74	1
Mis18a	0.000108231	1.6548	0.205	0.041	1
Med30	0.000110085	0.634462	0.538	0.211	1
Rpl4	0.000110206	0.760343	0.897	0.72	1
Ncaph	0.000110759	1.64167	0.256	0.061	1
Sptssa	0.000112108	1.10409	0.667	0.358	1
Sdhd	0.000112835	1.17364	0.59	0.256	1
Psma6	0.000113395	0.818057	0.667	0.305	1
Rpl23	0.000115426	0.68845	0.974	0.935	1
Srgap2	0.000115844	-2.3916	0.487	0.634	1
Tbcb	0.000117671	0.990257	0.641	0.333	1
Wdr36	0.000118659	0.915356	0.359	0.106	1
Psmd14	0.00011879	1.15758	0.538	0.244	1
Ccr6	0.00012031	-5.67387	0	0.293	1
Rps10	0.000121775	0.556164	0.974	0.915	1
Uqcrq	0.000122881	0.906165	0.846	0.593	1
Rbm39	0.000124252	-0.855444	0.795	0.894	1
Qrsl1	0.000125843	2.80816	0.179	0.033	1
Npm1	0.000127094	0.946114	0.923	0.797	1
Mrps18c	0.000127383	0.714146	0.487	0.179	1
Wdr74	0.000130917	2.14636	0.256	0.065	1
Aif1	0.00013327	1.16651	0.692	0.435	1
Iqgap3	0.000136851	3.44177	0.103	0.008	1
Adh5	0.000138775	1.09053	0.615	0.293	1
Tmem126b	0.000138787	0.945345	0.256	0.061	1
Pole3	0.000139173	1.2291	0.308	0.089	1
Prelid1	0.000139848	0.976298	0.641	0.329	1
Ap3s1	0.000140141	1.0614	0.538	0.236	1
Rab11a	0.000141288	1.28478	0.692	0.35	1
Rad18	0.000141585	3.14859	0.103	0.008	1
Scn3b	0.000141585	3.7585	0.103	0.008	1
Tenm2	0.000141585	4.25824	0.103	0.008	1
2310009B15Rik	0.000143799	0.781079	0.308	0.085	1
Btf3	0.000144097	0.66646	0.923	0.772	1
Abcg1	0.000144112	1.45771	0.538	0.248	1
Ddias	0.000146474	2.87793	0.103	0.008	1
Sgo2a	0.000146484	1.32394	0.205	0.041	1
Gm16286	0.000147835	0.936464	0.718	0.398	1
Tfdp1	0.000148421	1.31675	0.359	0.114	1
Slc25a10	0.000151188	1.7243	0.231	0.053	1
Fancd2	0.000151521	2.57001	0.103	0.008	1
Gm49774	0.000151521	3.00159	0.103	0.008	1
Nabp2	0.0001547	0.851174	0.462	0.167	1
Fam20c	0.000159653	1.61091	0.231	0.053	1
Rnf26	0.000160004	2.0738	0.179	0.033	1
Bax	0.000160357	0.971076	0.795	0.5	1
Lrr1	0.000162111	1.21061	0.103	0.008	1
Ndufaf8	0.000162213	0.761022	0.462	0.167	1
mt-Nd1	0.000163051	0.693327	0.974	0.833	1
Pimreg	0.000163509	1.7801	0.179	0.033	1
Siglech	0.000164538	-2.58554	0.154	0.459	1
Crmp1	0.000165809	0.921878	0.385	0.126	1
Sumo2	0.000166771	0.677151	0.846	0.667	1
Parl	0.000167408	0.820079	0.436	0.159	1
March9	0.000170362	3.1874	0.154	0.024	1
Rrm2	0.000170735	2.0068	0.179	0.033	1
C1d	0.000170982	0.981221	0.487	0.203	1
Ptcd2	0.000172384	1.25205	0.359	0.114	1
Ssr2	0.000172788	0.786023	0.641	0.317	1
Bola3	0.000173329	1.19008	0.385	0.134	1
Vps33a	0.000176698	0.969407	0.308	0.089	1
Chchd2	0.000178743	0.624516	0.974	0.87	1
Psma5	0.000180294	0.852378	0.641	0.366	1
Ints11	0.000181398	0.938097	0.333	0.098	1
Dtymk	0.000181411	1.02704	0.462	0.175	1
Fam92a	0.000188619	0.394113	0.308	0.085	1
Nudt19	0.000189502	1.17517	0.256	0.065	1
Micos13	0.000191088	0.720733	0.795	0.427	1
Cd81	0.000191963	-1.69823	0.59	0.72	1
Prdm8	0.00019202	3.04419	0.154	0.024	1
Aimp2	0.000194662	1.07473	0.231	0.053	1
Arl6ip4	0.000195288	1.26542	0.487	0.203	1
Nme1	0.000195647	1.00774	0.692	0.423	1
Cpsf1	0.000195903	1.34657	0.256	0.065	1
Dsn1	0.000195946	3.44548	0.128	0.016	1
Ccdc124	0.0001965	1.26551	0.462	0.183	1
Kif22	0.000198179	0.721884	0.231	0.053	1
Glo1	0.000200166	1.02834	0.462	0.179	1
Jund	0.000200656	-0.884752	0.872	0.927	1
Akr1a1	0.000202073	0.957176	0.795	0.524	1
Serhl	0.000202757	1.44643	0.179	0.033	1
Tmpo	0.000203821	1.0465	0.564	0.264	1
Inf2	0.000206948	3.37673	0.128	0.016	1
Tarbp2	0.000208296	2.10395	0.282	0.081	1
Trappc6a	0.000211028	1.96121	0.385	0.142	1
Cdca3	0.000212852	0.977654	0.231	0.053	1
Mrpl57	0.000215223	1.00043	0.59	0.268	1
Igf1	0.000216457	2.07874	0.333	0.114	1
Ifngr1	0.000216869	-1.59346	0.513	0.691	1
Aldh16a1	0.000218631	0.96865	0.282	0.077	1
Mrc1	0.000218716	-1.39391	0.41	0.134	1
Sap30	0.00021984	1.36947	0.41	0.159	1
Gtf3a	0.00022115	1.27882	0.359	0.122	1
Timmdc1	0.000222402	1.9838	0.256	0.069	1
Ccdc22	0.000223597	0.8425	0.359	0.118	1
Cenpn	0.000224544	1.45635	0.128	0.016	1
Ybx1	0.000225061	0.758887	0.872	0.764	1
0610010K14Rik	0.000226864	0.978698	0.615	0.289	1
Srm	0.000229934	0.705206	0.41	0.134	1
Cxcl16	0.000231276	1.62163	0.41	0.167	1
Snx11	0.000231858	1.52189	0.231	0.057	1
Kctd12	0.000236162	-1.8774	0.462	0.63	1
Dusp4	0.000237045	2.7199	0.128	0.016	1
Ttll12	0.000237045	2.5611	0.128	0.016	1
Pmpca	0.000238784	1.043	0.256	0.065	1
Actg1	0.00023994	0.593055	0.974	0.894	1
Ube2a	0.000240203	1.21158	0.487	0.199	1
Arpc2	0.000240494	0.578154	0.923	0.736	1
Mrpl13	0.000240969	0.962176	0.436	0.163	1
Rps19	0.000242218	0.582008	0.949	0.907	1
C1galt1c1	0.00024251	2.13001	0.282	0.081	1
Csf1r	0.000245106	-1.97042	0.615	0.659	1
Blm	0.000249105	1.64369	0.154	0.024	1
Cuedc2	0.000249184	0.703799	0.667	0.321	1
Parp1	0.000249953	1.111	0.538	0.248	1
Ppic	0.000250197	1.55045	0.128	0.016	1
Ppia	0.000255352	0.467587	1	0.939	1
Ska3	0.000257026	0.673079	0.128	0.016	1
Thyn1	0.000258556	1.28518	0.359	0.122	1
Cyba	0.000265912	0.750688	0.897	0.772	1
Nfyc	0.000266263	1.93916	0.231	0.057	1
Mef2c	0.000267809	-2.35013	0.462	0.614	1
Tmem14c	0.000269766	1.10919	0.615	0.321	1
Cep55	0.000271213	1.68997	0.128	0.016	1
Tomm6	0.000273478	0.840888	0.821	0.524	1
Ppp2cb	0.000273981	0.614103	0.333	0.106	1
Sin3b	0.000274887	0.955273	0.667	0.337	1
Ola1	0.000275248	0.94439	0.564	0.252	1
Pcp4	0.000277412	-3.2238	0.077	0.366	1
Etv1	0.000277953	-2.46204	0.051	0.35	1
Carhsp1	0.000279455	1.061	0.282	0.077	1
Txn1	0.000279729	0.66888	0.744	0.435	1
Nt5c	0.000283685	0.9951	0.564	0.252	1
Flna	0.000285776	1.14657	0.538	0.244	1
Tmed3	0.000286595	0.875499	0.641	0.293	1
Abracl	0.000289431	0.944694	0.718	0.423	1
Prdx2	0.000290449	0.701157	0.795	0.504	1
Cct6a	0.000291866	0.822696	0.667	0.354	1
Cox5a	0.000294647	0.951428	0.795	0.585	1
Zmiz2	0.000303482	0.798919	0.513	0.215	1
Mcm6	0.000306338	2.20667	0.256	0.073	1
Arl3	0.0003182	0.650243	0.462	0.179	1
Stmn1	0.000319112	0.388265	0.897	0.541	1
Uqcrfs1	0.000320223	0.920179	0.667	0.333	1
Serinc3	0.000321023	-1.43774	0.615	0.732	1
Tnfaip2	0.000321433	-0.153411	0.231	0.057	1
Hsh2d	0.000321497	5.11116	0.077	0.004	1
Epcam	0.000321497	5.73936	0.077	0.004	1
Epb41l4a	0.000321497	5.32119	0.077	0.004	1
Hspe1-rs1	0.000321497	4.2714	0.077	0.004	1
Nudt10	0.000321497	4.15621	0.077	0.004	1
Cenpi	0.000321497	3.97208	0.077	0.004	1
H2afz	0.000322652	0.649992	0.949	0.797	1
Vim	0.00032307	1.32463	0.59	0.293	1
Rps16	0.000327653	0.672326	0.923	0.898	1
Prdx4	0.000328824	1.01052	0.513	0.228	1
Cmtm3	0.000329272	1.10124	0.41	0.146	1
Kynu	0.000334415	3.63611	0.077	0.004	1
Pole	0.000334415	3.82917	0.077	0.004	1
Prr36	0.000334415	4.65283	0.077	0.004	1
Eme1	0.000334415	3.70348	0.077	0.004	1
Recql4	0.000334415	4.47618	0.077	0.004	1
Cript	0.000335249	0.995702	0.564	0.244	1
Mphosph9	0.00033696	1.11675	0.256	0.069	1
Rps18	0.000340314	0.760242	0.949	0.866	1
Cand1	0.000344595	1.14154	0.385	0.142	1
Rpl28	0.000345136	0.71619	0.974	0.87	1
LTO1	0.000346508	2.1581	0.179	0.037	1
Ndufa9	0.000346887	0.871035	0.538	0.24	1
Nos1	0.000347818	3.59544	0.077	0.004	1
Gtse1	0.000347818	4.09777	0.077	0.004	1
Rnf115	0.000353213	1.53124	0.487	0.22	1
Magoh	0.000357907	1.01855	0.538	0.232	1
Ttc30b	0.000361722	2.73988	0.077	0.004	1
Maneal	0.000361722	2.02858	0.077	0.004	1
D130017N08Rik	0.000361722	1.71314	0.077	0.004	1
Cpa2	0.000361722	2.61044	0.077	0.004	1
Lins1	0.000361722	2.99164	0.077	0.004	1
Tube1	0.000361722	2.87942	0.077	0.004	1
Tnfrsf10b	0.000361722	2.48275	0.077	0.004	1
Camk2a	0.000361722	3.06785	0.077	0.004	1
Tfec	0.000361722	3.17574	0.077	0.004	1
Uso1	0.000363699	1.42848	0.359	0.126	1
Nav3	0.000365243	-2.74764	0.103	0.394	1
Nol12	0.000365686	1.50137	0.359	0.13	1
Cetn2	0.000368721	0.460914	0.41	0.142	1
Serp1	0.000369222	1.20097	0.692	0.366	1
Bola1	0.000373715	0.802434	0.385	0.138	1
Rps13	0.000379263	0.654701	0.974	0.907	1
Zfyve16	0.000379472	1.19972	0.282	0.081	1
Abcc3	0.000380781	1.07387	0.359	0.118	1
Pkn3	0.000384018	3.70714	0.051	0	1
Tox2	0.000384018	4.85674	0.051	0	1
Rad54b	0.000384018	3.6078	0.051	0	1
Car9	0.000384018	3.96352	0.051	0	1
Ptch2	0.000384018	4.34886	0.051	0	1
Atg9b	0.000384018	5.54524	0.051	0	1
Ppm1n	0.000384018	4.41819	0.051	0	1
Bcam	0.000384018	4.42564	0.051	0	1
B230322F03Rik	0.000384018	5.40622	0.051	0	1
Myod1	0.000384018	4.41644	0.051	0	1
Tph1	0.000384018	7.32124	0.051	0	1
Fanci	0.000384018	3.71939	0.051	0	1
Gm45767	0.000384018	3.77127	0.051	0	1
Ldhd	0.000384018	5.0521	0.051	0	1
Olfr920	0.000384018	4.6785	0.051	0	1
Tecta	0.000384018	3.92653	0.051	0	1
Tmem202	0.000384018	4.206	0.051	0	1
Gm28229	0.000384018	5.55893	0.051	0	1
Ptges3l	0.000384018	3.83439	0.051	0	1
Sh3yl1	0.000384018	6.21839	0.051	0	1
D430019H16Rik	0.000384018	5.26037	0.051	0	1
Gm36445	0.000384018	4.27364	0.051	0	1
Pcsk1	0.000384018	5.56885	0.051	0	1
Il17rb	0.000384018	4.85674	0.051	0	1
Gm10366	0.000384018	5.67898	0.051	0	1
Ebf2	0.000384018	4.49679	0.051	0	1
Spag1	0.000384018	4.16968	0.051	0	1
Cldn1	0.000384018	5.79564	0.051	0	1
Mapk13	0.000384018	4.38336	0.051	0	1
B230217O12Rik	0.000384018	3.71983	0.051	0	1
Jade3	0.000384018	3.82267	0.051	0	1
Fgd1	0.000384018	4.22893	0.051	0	1
Vdr	0.000384018	4.59649	0.051	0	1
Cacna1f	0.000384018	4.58969	0.051	0	1
Rpl13a	0.000384498	0.620124	0.974	0.785	1
Tagln2	0.000386045	1.30567	0.564	0.301	1
Immp1l	0.000386238	0.818434	0.487	0.195	1
Cntrob	0.00038679	2.04502	0.205	0.049	1
Myo1e	0.000389516	0.778488	0.308	0.093	1
Hmgb3	0.000396334	1.42278	0.282	0.085	1
Gdf15	0.000398466	4.0618	0.179	0.037	1
Impa2	0.000398466	1.65237	0.179	0.037	1
Acadvl	0.000399297	1.1138	0.359	0.122	1
Psma2	0.000399721	0.864792	0.795	0.488	1
Cnpy2	0.000401543	0.869985	0.615	0.305	1
Mocs2	0.000414086	1.11406	0.487	0.207	1
Ldha	0.00041654	0.979609	0.769	0.476	1
Lsm4	0.000417102	1.15153	0.538	0.264	1
Fscn1	0.000419493	-3.15428	0.103	0.37	1
Commd3	0.000428546	0.831279	0.564	0.264	1
Clec4n	0.000438421	1.23618	0.282	0.085	1
Rgs12	0.000439942	2.01804	0.179	0.037	1
Slc26a11	0.000439942	1.56714	0.179	0.037	1
Rps27a	0.000444021	0.618292	0.974	0.951	1
Atg10	0.000444764	1.31619	0.282	0.085	1
Rpl10	0.000445997	0.595444	1	0.805	1
Cenpk	0.000448706	1.80774	0.179	0.037	1
Hat1	0.000469565	0.908543	0.385	0.138	1
Ttr	0.000469736	-3.3063	0.051	0.325	1
Psmb2	0.000472331	0.879853	0.692	0.415	1
Rpl14	0.000474506	0.727434	0.949	0.756	1
Ilk	0.000483695	1.27651	0.513	0.215	1
Brinp2	0.000486397	3.20535	0.154	0.028	1
Socs2	0.000487477	1.24257	0.205	0.049	1
Prmt1	0.000488085	0.625245	0.615	0.301	1
E2f2	0.000497027	2.29832	0.154	0.028	1
Mrpl40	0.000498007	0.934655	0.333	0.11	1
Nadk	0.00050238	0.803979	0.41	0.159	1
Ift27	0.000505825	0.875318	0.282	0.085	1
Rpl9	0.000506765	0.514435	0.949	0.935	1
Ostf1	0.000508938	0.679702	0.821	0.52	1
Bag1	0.000510908	0.957804	0.692	0.407	1
Noc2l	0.000513806	0.780228	0.538	0.22	1
Rhob	0.000514051	-1.78834	0.487	0.671	1
Erap1	0.000517679	1.02146	0.333	0.11	1
Atp5o	0.000544847	0.821432	0.718	0.431	1
Ndufa10	0.000551356	0.641983	0.667	0.333	1
Pag1	0.000552271	-2.58608	0.179	0.455	1
Lmnb1	0.00055773	0.99155	0.385	0.15	1
Cct2	0.000559723	0.735635	0.718	0.439	1
Srbd1	0.000561074	1.33499	0.205	0.049	1
Psmd8	0.000561438	0.765413	0.692	0.398	1
Slc38a7	0.000570969	1.45953	0.205	0.049	1
Arpc1b	0.000572638	0.62635	0.897	0.715	1
Pdzd11	0.000575551	0.98436	0.359	0.13	1
Pdlim7	0.000577727	2.14854	0.154	0.028	1
Nus1	0.000585726	1.4649	0.41	0.163	1
Coa7	0.000591248	0.737381	0.205	0.049	1
Cfh	0.000595653	-2.20419	0.333	0.537	1
Mrpl51	0.000604008	0.335455	0.615	0.272	1
Rrbp1	0.000604203	-1.5458	0.615	0.695	1
Mrps18a	0.000605696	0.894047	0.487	0.199	1
Eif2b1	0.000607763	0.892301	0.231	0.061	1
Psma1	0.000610914	0.630581	0.692	0.39	1
Cwc15	0.000623663	0.818317	0.692	0.354	1
Dtl	0.000629159	0.544255	0.154	0.028	1
Hnrnpll	0.000644811	0.790578	0.385	0.142	1
Mpv17l2	0.000646872	0.697701	0.333	0.114	1
Nup88	0.00064903	0.378361	0.359	0.126	1
Tbc1d12	0.000652069	0.92684	0.282	0.085	1
Bak1	0.000653898	1.51048	0.282	0.089	1
Aacs	0.000656443	0.938151	0.154	0.028	1
Tsr2	0.000656443	1.22716	0.154	0.028	1
Rrp12	0.000669982	2.68855	0.128	0.02	1
Tyw3	0.000672285	3.09157	0.103	0.012	1
Lyar	0.000676451	0.971671	0.41	0.163	1
Plxnd1	0.000681485	1.40725	0.282	0.089	1
Mlh3	0.000684621	2.12203	0.179	0.041	1
Lyz2	0.000686123	0.873335	0.692	0.447	1
Cdc45	0.000686244	2.95618	0.128	0.02	1
Spint2	0.000686875	2.29054	0.231	0.065	1
Apoc4	0.000702873	2.86248	0.128	0.02	1
Rmi2	0.000702873	2.72923	0.128	0.02	1
Arpc5l	0.000705355	0.542776	0.769	0.39	1
Zfp655	0.000707427	1.45245	0.333	0.118	1
Nfu1	0.000711654	0.900551	0.436	0.167	1
Vma21	0.000712509	0.676892	0.462	0.199	1
2310039H08Rik	0.000714058	2.07697	0.256	0.077	1
Nlrc4	0.000719874	3.03279	0.128	0.02	1
Map2k3	0.00072075	0.779788	0.385	0.146	1
Upf3a	0.000722587	1.20463	0.41	0.163	1
Dner	0.000725902	2.23613	0.205	0.053	1
Gng5	0.000734269	0.63566	0.949	0.74	1
Borcs8	0.000742285	1.10899	0.462	0.199	1
Dtnbp1	0.000747642	1.35585	0.462	0.22	1
Dmap1	0.000750671	2.42933	0.205	0.053	1
Nphp3	0.00075321	3.24894	0.103	0.012	1
Rps20	0.000763114	0.643218	0.974	0.907	1
H2afj	0.000767409	0.765235	0.795	0.504	1
Atad2	0.000771165	0.977053	0.333	0.118	1
Sh3bgrl2	0.000774808	2.46119	0.103	0.012	1
Gpr183	0.000781358	-1.67599	0.231	0.492	1
Capzb	0.000788494	0.868102	0.821	0.512	1
Brca1	0.000791775	1.12553	0.128	0.02	1
Mrps15	0.000794917	0.883183	0.538	0.244	1
Wdr62	0.000796981	2.0592	0.103	0.012	1
Mrpl18	0.000801719	0.85338	0.615	0.325	1
Ndufa12	0.000805283	0.755718	0.615	0.297	1
Rad51	0.000810764	1.19731	0.128	0.02	1
Brk1	0.000813178	0.758678	0.872	0.557	1
Htatip2	0.000813997	1.13402	0.282	0.089	1
Ctdnep1	0.000814846	1.10178	0.41	0.163	1
Mrpl30	0.000820246	0.652443	0.641	0.301	1
Dgcr6	0.000820525	0.348983	0.385	0.142	1
Mapre1	0.000823693	0.82607	0.718	0.394	1
Ada	0.000830174	2.08673	0.128	0.02	1
Neil3	0.000830174	1.89048	0.128	0.02	1
Rpl7	0.000831456	0.635664	0.974	0.874	1
Polr1d	0.000833365	0.921991	0.795	0.516	1
Ubb	0.000835305	-0.593057	1	0.967	1
Noa1	0.000836946	1.60455	0.256	0.077	1
Ung	0.000843103	1.09999	0.103	0.012	1
Mfsd3	0.000843103	1.58572	0.103	0.012	1
Grpel2	0.000843679	1.76622	0.205	0.053	1
Ak2	0.00084743	0.509005	0.538	0.228	1
Msh2	0.00085443	0.880981	0.256	0.073	1
Katnb1	0.000854443	0.903679	0.179	0.041	1
Dap	0.000865236	0.861319	0.436	0.179	1
Tpcn2	0.000870294	0.870014	0.128	0.02	1
Bag6	0.000880449	0.666785	0.564	0.28	1
Rbm17	0.000882176	0.739787	0.462	0.199	1
1810058I24Rik	0.000882584	1.26319	0.59	0.317	1
Mrps10	0.000885507	0.432592	0.359	0.126	1
Csf3r	0.000888969	-3.28351	0.077	0.329	1
Tmem216	0.000912206	1.28529	0.128	0.02	1
Jmjd1c	0.000912485	-1.66876	0.513	0.638	1
Riox2	0.000919226	1.75041	0.179	0.041	1
Numb	0.000924433	-2.27406	0.179	0.447	1
Dleu2	0.000930302	-2.18214	0.359	0.537	1
Rps27l	0.0009313	0.802536	0.667	0.451	1
Atp6v1f	0.000945979	0.986062	0.769	0.573	1
Cbr4	0.000947281	1.66126	0.205	0.053	1
Nt5c3	0.000949857	0.149138	0.308	0.102	1
Dkc1	0.000950841	0.318797	0.41	0.154	1
Dlgap5	0.000953297	1.04453	0.179	0.041	1
Tubb5	0.000954862	0.748145	0.795	0.602	1
Polr2h	0.000975555	0.978972	0.359	0.134	1
Abca9	0.000988878	-2.95383	0.154	0.39	1
Gas2l3	0.0010066	1.30399	0.179	0.041	1
Mif	0.00101273	0.445878	0.821	0.496	1
Nudt2	0.0010139	1.05931	0.308	0.106	1
Timm23	0.00101543	0.756113	0.615	0.362	1
Rpp14	0.00102343	0.770697	0.282	0.089	1
Plrg1	0.00102837	1.01131	0.205	0.053	1
P4hb	0.00103697	0.945397	0.641	0.358	1
Emd	0.00103916	0.590201	0.513	0.215	1
Inpp5d	0.00103973	-1.85903	0.385	0.577	1
Odf2l	0.00104366	1.42493	0.179	0.041	1
Alyref	0.00104467	1.28543	0.564	0.297	1
Aph1a	0.00104569	0.598684	0.59	0.28	1
Msr1	0.00105198	1.72114	0.231	0.069	1
Fxn	0.00105503	1.27104	0.231	0.065	1
Glipr1	0.00106108	1.85611	0.282	0.098	1
Eci2	0.00107657	0.864412	0.436	0.183	1
Tsc22d3	0.0010847	-1.81909	0.205	0.447	1
Atp6v1a	0.00109107	1.18524	0.615	0.333	1
Grpel1	0.00109659	1.51065	0.538	0.272	1
Hist1h1c	0.00111156	1.43267	0.462	0.215	1
Cmc1	0.00112055	1.08025	0.462	0.203	1
H3f3a	0.00113115	0.41342	0.974	0.919	1
Nampt	0.00113172	0.451237	0.436	0.175	1
0610012G03Rik	0.00113623	0.72732	0.667	0.378	1
Rnaseh2a	0.00113746	1.03456	0.231	0.065	1
Cdk1	0.00113978	0.422091	0.333	0.114	1
Rps3a1	0.00114468	0.513682	0.974	0.931	1
Rpl27	0.00114929	0.526364	0.949	0.846	1
Tmem184c	0.00116655	1.92925	0.231	0.069	1
Esd	0.00117103	0.896838	0.615	0.341	1
Tank	0.00118807	0.875079	0.359	0.138	1
Snapc2	0.00118858	2.38747	0.154	0.033	1
Cks1b	0.00119006	1.11686	0.282	0.093	1
Dcxr	0.00119006	1.61379	0.282	0.093	1
Ttc1	0.00119053	0.650953	0.462	0.195	1
Mark4	0.00119267	1.36791	0.256	0.077	1
Ptdss2	0.00120752	1.65114	0.256	0.081	1
Gmnn	0.00120765	0.788139	0.231	0.065	1
Sox11	0.00120968	0.510035	0.41	0.159	1
Actr3	0.00122326	0.781324	0.769	0.569	1
Gltp	0.00123594	1.03289	0.564	0.309	1
Bbip1	0.00124036	0.70129	0.564	0.264	1
1110004F10Rik	0.0012577	0.7309	0.615	0.329	1
Rpsa	0.00126046	0.76115	0.949	0.862	1
Naca	0.00126898	0.589373	0.949	0.846	1
Mrpl21	0.00127704	0.756555	0.487	0.22	1
Chmp1a	0.00127704	0.733761	0.41	0.163	1
Coa6	0.00127999	1.2031	0.308	0.11	1
Elob	0.00128436	0.532214	0.872	0.642	1
Nle1	0.00128518	1.38198	0.154	0.033	1
Irgq	0.00129083	0.562088	0.205	0.053	1
Acadl	0.00130221	1.01856	0.385	0.154	1
Bub1b	0.00131043	1.70123	0.154	0.033	1
Med28	0.00131179	1.11637	0.538	0.272	1
Cdkn2c	0.0013203	1.70258	0.256	0.085	1
Farsa	0.00132997	0.774382	0.385	0.146	1
Gm11361	0.00133318	0.813746	0.256	0.077	1
C1qbp	0.00134449	0.876649	0.641	0.35	1
Ciao2a	0.0013507	0.925673	0.538	0.28	1
Fus	0.00135104	-0.997126	0.667	0.748	1
Rab20	0.00135155	1.34538	0.308	0.114	1
Fundc2	0.001354	0.684334	0.462	0.211	1
Vta1	0.00135898	1.25536	0.462	0.207	1
Cnbp	0.00135915	0.576279	0.846	0.569	1
Gpatch11	0.00137214	1.54771	0.282	0.098	1
Serf2	0.00137215	0.593897	0.923	0.813	1
Cnih4	0.00138393	0.592946	0.667	0.346	1
Psmd1	0.00138514	0.794057	0.487	0.236	1
Mrpl45	0.00139013	1.63333	0.231	0.069	1
Macf1	0.00140239	-1.07161	0.641	0.76	1
Sgk1	0.00141509	-2.24655	0.333	0.524	1
Chchd3	0.00142402	0.351872	0.513	0.215	1
Rpa3	0.00142506	1.026	0.385	0.163	1
Pts	0.00143055	0.911779	0.462	0.203	1
Ndc80	0.00144372	0.815924	0.154	0.033	1
Alg13	0.00144372	0.537014	0.154	0.033	1
Xrcc5	0.00147184	1.55288	0.154	0.033	1
Msh6	0.00147755	1.81887	0.205	0.057	1
Mrpl41	0.00148046	1.11759	0.487	0.252	1
Cdr1os	0.0014881	-5.09852	0.026	0.248	1
Tubb3	0.00149387	0.730106	0.41	0.163	1
AA465934	0.00149445	1.54759	0.231	0.069	1
Uap1l1	0.00149826	0.975816	0.385	0.15	1
Csmd3	0.00150304	-4.72143	0.026	0.248	1
Bop1	0.00150943	0.593259	0.256	0.077	1
Atp6v0e	0.00151452	0.716737	0.744	0.541	1
Nsmce4a	0.00152812	0.713598	0.487	0.22	1
Dhfr	0.00154008	1.26449	0.179	0.045	1
Taf12	0.0015489	0.25228	0.359	0.13	1
F11r	0.00155019	-2.70026	0.231	0.435	1
Spidr	0.00156655	1.69231	0.179	0.045	1
Pbdc1	0.0015727	1.32429	0.359	0.15	1
Slc25a33	0.00158075	0.279501	0.333	0.118	1
Pla2g7	0.00158441	0.56268	0.359	0.142	1
Nup160	0.00158941	0.976104	0.154	0.033	1
Wsb2	0.00159432	0.73495	0.385	0.154	1
Rab7	0.00159826	1.06292	0.718	0.431	1
Rps6	0.00162366	0.67747	0.923	0.768	1
Aldh2	0.00164044	0.907119	0.487	0.24	1
Ube2r2	0.00164046	0.511122	0.59	0.285	1
Nat9	0.00165594	0.78803	0.333	0.118	1
Pdcd6	0.00166423	0.460211	0.564	0.252	1
Tceal8	0.00166987	1.22019	0.308	0.11	1
Rfc5	0.00167647	1.10885	0.231	0.069	1
Mtrf1	0.0016832	1.11973	0.154	0.033	1
Ciapin1	0.00169336	0.502048	0.436	0.183	1
Sec24c	0.00169925	0.453145	0.333	0.122	1
Dnph1	0.00171558	0.708246	0.154	0.033	1
Mpg	0.00172723	0.954353	0.282	0.093	1
Pfdn6	0.00172951	1.17369	0.41	0.191	1
Cks2	0.00173649	0.137202	0.513	0.228	1
Cacna2d3	0.00174816	3.35723	0.128	0.024	1
Atp5mpl	0.00175384	0.418339	0.821	0.48	1
Pias4	0.00177252	0.914897	0.308	0.11	1
Rpl7a	0.00177824	0.545373	0.923	0.813	1
Tmeff1	0.00178205	0.466931	0.154	0.033	1
Slc25a39	0.00179535	0.446616	0.487	0.215	1
Lpin1	0.00180037	1.05404	0.231	0.069	1
Asna1	0.00181645	0.803372	0.436	0.191	1
Hnrnpf	0.00183901	0.614252	0.846	0.728	1
Mrpl27	0.00184427	0.861494	0.359	0.142	1
Tsc22d4	0.00184521	-1.55277	0.487	0.585	1
Chaf1a	0.00185534	0.793212	0.179	0.045	1
Haus1	0.00185534	0.898475	0.179	0.045	1
Med8	0.00186036	0.85199	0.487	0.228	1
Cox10	0.00186283	0.942392	0.205	0.057	1
Acbd6	0.00186731	0.141059	0.487	0.211	1
Gpx4	0.00187252	0.560272	0.821	0.61	1
Pdcl3	0.00188541	0.893902	0.538	0.252	1
Ube2i	0.00188895	0.618766	0.744	0.451	1
Fam114a2	0.00189524	1.00161	0.462	0.199	1
Gars	0.00189697	1.0435	0.41	0.179	1
Zfp36l2	0.00190011	-1.60988	0.59	0.663	1
Aspm	0.00190332	3.15683	0.128	0.024	1
Pus7l	0.00190332	2.5357	0.128	0.024	1
Nipsnap3b	0.00190454	0.922036	0.333	0.122	1
Zfhx3	0.00190803	-2.03805	0.385	0.541	1
Pycrl	0.00193263	0.877727	0.231	0.069	1
Etfb	0.00193772	0.902875	0.538	0.276	1
Ncapd2	0.00195106	1.24933	0.179	0.045	1
Rpl27a	0.00195898	0.537638	1	0.935	1
Ap5s1	0.00198555	1.95662	0.128	0.024	1
Atp5a1	0.00198825	0.550917	0.872	0.63	1
H2-M3	0.00200992	1.53998	0.333	0.138	1
Pxdc1	0.00201951	1.41852	0.308	0.118	1
Idh3a	0.00202137	1.21225	0.359	0.146	1
Med19	0.00202367	1.52029	0.282	0.098	1
Shcbp1	0.00202787	1.45723	0.128	0.024	1
Stx12	0.0020387	0.705467	0.359	0.138	1
Plk1	0.00205131	1.01184	0.179	0.045	1
Mrpl17	0.00206055	0.854326	0.513	0.252	1
Atp5g1	0.00206657	0.650379	0.821	0.642	1
Stk35	0.00207103	2.16618	0.128	0.024	1
Pkmyt1	0.00207103	1.15507	0.128	0.024	1
Ppil3	0.00209927	1.41484	0.333	0.13	1
Mgst1	0.00210411	2.4571	0.154	0.037	1
Banf1	0.00210475	0.8228	0.538	0.301	1
Il7r	0.00210888	-5.88891	0	0.203	1
Eif4b	0.00211259	0.62048	0.564	0.285	1
Bub1	0.00211502	1.81758	0.128	0.024	1
Rwdd1	0.00213266	0.674869	0.59	0.317	1
Bri3	0.00213277	0.94665	0.821	0.577	1
Icmt	0.00213282	0.3847	0.231	0.069	1
Tiprl	0.00213507	0.866131	0.513	0.244	1
Pard6g	0.00214965	1.29805	0.179	0.049	1
Noct	0.00215286	1.81581	0.205	0.061	1
Gpr68	0.00215987	1.2701	0.128	0.024	1
Aimp1	0.00216787	0.9241	0.59	0.317	1
Spcs2	0.00216819	0.578851	0.769	0.581	1
Id2	0.0021765	0.691272	0.718	0.423	1
Dus1l	0.00217869	0.529237	0.282	0.098	1
Prc1	0.00218146	0.753138	0.256	0.081	1
Anln	0.00219231	0.436252	0.179	0.045	1
Uhmk1	0.00220022	2.03577	0.256	0.089	1
Smarca5	0.00220088	0.639211	0.692	0.407	1
Ube2v1	0.00220192	0.651661	0.487	0.224	1
Rfc4	0.0022112	1.12418	0.231	0.073	1
Cct7	0.00221582	0.636488	0.692	0.402	1
Ssr4	0.0022213	0.663422	0.795	0.642	1
Rps15a	0.00223063	0.395638	1	0.89	1
Tpd52	0.00224435	0.784128	0.641	0.354	1
Cdkn3	0.0022522	1.63637	0.128	0.024	1
Rack1	0.00226482	0.577773	0.949	0.797	1
Thoc6	0.00226651	1.25521	0.256	0.085	1
Wdr1	0.00226866	0.710793	0.59	0.293	1
Paics	0.00226885	0.69027	0.538	0.248	1
Psmc5	0.00227842	0.733412	0.667	0.378	1
Use1	0.00228056	0.847108	0.513	0.248	1
Rps3	0.00229896	0.544326	0.949	0.923	1
Usp4	0.00234971	0.921148	0.308	0.114	1
Snrnp200	0.00236696	0.904737	0.385	0.154	1
E2f7	0.00237121	4.65026	0.077	0.008	1
A830005F24Rik	0.00237121	3.45905	0.077	0.008	1
Gstp3	0.00237121	3.67989	0.077	0.008	1
Psmb9	0.00237815	0.727687	0.487	0.22	1
Phf5a	0.00238159	0.724255	0.538	0.256	1
Ezh2	0.00238377	0.716394	0.385	0.163	1
Mdh2	0.00238705	0.74391	0.692	0.386	1
Snx6	0.00238911	0.878139	0.692	0.443	1
Dnajc2	0.00240325	0.792908	0.513	0.248	1
Pin1	0.00240672	0.814949	0.462	0.215	1
Txndc17	0.00241519	0.945903	0.59	0.37	1
Srp72	0.00242441	0.485785	0.59	0.297	1
Kcnk2	0.00244462	2.89702	0.077	0.008	1
Wars2	0.00244462	2.9239	0.077	0.008	1
Mfap4	0.00244462	2.0497	0.077	0.008	1
Cacng4	0.00244462	3.32856	0.077	0.008	1
Ccdc14	0.00244462	2.40007	0.077	0.008	1
4732491K20Rik	0.00244462	3.21743	0.077	0.008	1
Brip1	0.00244957	2.05452	0.103	0.016	1
Eef1b2	0.00245013	0.645138	0.872	0.785	1
Pgap2	0.00245287	0.887066	0.308	0.118	1
Sri	0.00245682	0.632851	0.718	0.455	1
Lrrc58	0.00245802	0.654037	0.538	0.26	1
Ezr	0.0024667	0.317813	0.462	0.199	1
Eif3h	0.00249175	0.812774	0.718	0.52	1
Cacna1b	0.00250951	2.63359	0.103	0.016	1
Lrrc40	0.00250951	2.40269	0.103	0.016	1
Kyat1	0.0025201	1.43735	0.077	0.008	1
Trp53rkb	0.0025201	3.24023	0.077	0.008	1
Mir9-3hg	0.0025201	2.90175	0.077	0.008	1
Il18bp	0.0025201	1.20664	0.077	0.008	1
Nmnat3	0.0025201	2.85979	0.077	0.008	1
Ankrd9	0.0025201	3.71439	0.077	0.008	1
Efna5	0.0025201	3.10522	0.077	0.008	1
Map2k4	0.00254606	0.864856	0.308	0.114	1
Rsrp1	0.00256338	-0.830999	0.667	0.789	1
Tdp1	0.00256403	1.33764	0.154	0.037	1
Dock4	0.0025662	-1.65207	0.333	0.512	1
Atf5	0.00257077	2.20191	0.103	0.016	1
Glce	0.00257077	2.45357	0.103	0.016	1
Ube2ql1	0.00257077	1.25159	0.103	0.016	1
Robo1	0.00257077	2.74923	0.103	0.016	1
Lamtor2	0.00257909	0.650483	0.718	0.435	1
Gpr155	0.00258344	-3.97847	0.026	0.232	1
Fdx2	0.0025877	0.655406	0.282	0.102	1
Mnd1	0.00259771	2.34823	0.077	0.008	1
E430018J23Rik	0.00259771	1.83443	0.077	0.008	1
Fam149a	0.00259771	2.52222	0.077	0.008	1
2610318N02Rik	0.00259771	2.47715	0.077	0.008	1
Ecsit	0.00260474	1.0926	0.231	0.073	1
Sema6a	0.0026101	1.99089	0.154	0.037	1
Echs1	0.00262121	0.750619	0.513	0.248	1
Mxra8	0.00263341	2.45148	0.103	0.016	1
E2f8	0.00263341	2.55032	0.103	0.016	1
Cdc6	0.00263341	2.55559	0.103	0.016	1
Pofut2	0.00264167	1.02825	0.333	0.13	1
Polr2b	0.00264586	1.14246	0.41	0.179	1
Ppp1r14b	0.00265273	0.719544	0.795	0.557	1
Nova2	0.00265693	1.33605	0.154	0.037	1
Csrnp3	0.0026775	1.60697	0.077	0.008	1
Melk	0.0026775	1.9818	0.077	0.008	1
Ccdc171	0.0026775	1.23334	0.077	0.008	1
Ttk	0.0026775	0.7056	0.077	0.008	1
Grip1	0.0026775	0.884418	0.077	0.008	1
Park7	0.00268711	0.464816	0.821	0.557	1
Psmc2	0.00269224	0.864983	0.564	0.309	1
Wfs1	0.00269743	2.56697	0.103	0.016	1
Zfp423	0.00269743	0.825525	0.103	0.016	1
Fastk	0.00270236	0.529334	0.359	0.142	1
Tmem219	0.00271662	0.736	0.385	0.171	1
Gnai3	0.00272172	0.700632	0.487	0.22	1
Nin	0.00272416	0.47131	0.333	0.122	1
Nagk	0.00273747	0.518834	0.385	0.159	1
Ly6e	0.00275177	-1.14888	0.59	0.659	1
Tmco4	0.00276288	2.02993	0.103	0.016	1
Nek6	0.00276469	1.05882	0.41	0.195	1
Dnmt1	0.00277047	1.34023	0.385	0.171	1
Rbl1	0.00280205	1.56754	0.154	0.037	1
Cox6b1	0.00280609	0.497118	0.846	0.683	1
Ncapg2	0.00282174	0.867593	0.179	0.049	1
Cdk4	0.00282305	0.526288	0.59	0.321	1
Kif14	0.00282977	1.33946	0.103	0.016	1
Slc25a3	0.00283008	0.493446	0.897	0.736	1
Ifi27	0.00284809	0.556479	0.513	0.244	1
Tpst1	0.00285201	1.80278	0.154	0.037	1
Alg8	0.00285201	1.50031	0.154	0.037	1
Vdac3	0.00286017	0.528957	0.744	0.423	1
Ivns1abp	0.0028622	-1.86124	0.487	0.581	1
Armc10	0.00288492	1.09307	0.205	0.061	1
Lyplal1	0.00290278	1.82379	0.154	0.037	1
Mms22l	0.00290278	1.7541	0.154	0.037	1
Inpp5e	0.00291231	1.59457	0.179	0.049	1
Tmem251	0.0029287	0.377455	0.333	0.126	1
Snrpd1	0.00293259	0.735405	0.641	0.37	1
Gla	0.002938	2.15857	0.231	0.077	1
Ppil1	0.00293913	0.98144	0.256	0.089	1
Psmb1	0.00295243	0.743958	0.795	0.61	1
Spats2	0.00296942	1.11495	0.205	0.061	1
Dynll2	0.00298226	0.799938	0.564	0.305	1
Rps24	0.00299046	0.404502	1	0.943	1
Rbbp8	0.00301598	1.55127	0.308	0.122	1
Mink1	0.00303495	-4.20183	0	0.191	1
Nprl3	0.00306009	1.45858	0.154	0.037	1
Snapc3	0.00308869	0.856458	0.256	0.089	1
Rrn3	0.00309687	1.22601	0.231	0.077	1
Pdcd5	0.00310196	0.62468	0.667	0.402	1
Cenps	0.00311423	1.12695	0.154	0.037	1
Smdt1	0.0031397	0.678056	0.769	0.533	1
Rpl24	0.00316894	0.559046	0.923	0.862	1
Dmac1	0.00317179	0.329991	0.462	0.203	1
Tanc2	0.0031724	-2.1669	0.128	0.354	1
Fam234a	0.00319063	1.30927	0.205	0.061	1
Gga1	0.00319481	1.05337	0.359	0.154	1
Gnpnat1	0.00320016	1.29985	0.179	0.049	1
Urod	0.00320177	0.912958	0.282	0.102	1
Tmem179b	0.00321092	0.896067	0.436	0.195	1
Ern1	0.00325059	1.03135	0.179	0.049	1
Klf2	0.00327552	-1.72645	0.385	0.581	1
Psmd11	0.00327905	0.438953	0.59	0.289	1
Utp20	0.00328325	1.32182	0.205	0.061	1
Prr13	0.00328774	0.660765	0.487	0.224	1
Hba-a1	0.00330638	-4.40105	0.026	0.224	1
Runx3	0.00331601	1.13072	0.333	0.134	1
Rplp1	0.0033197	0.585742	0.897	0.862	1
Rmdn3	0.00333047	0.816931	0.205	0.061	1
Mis18bp1	0.00333963	0.383908	0.154	0.037	1
Ugp2	0.00335901	1.29612	0.359	0.154	1
Med14	0.00336033	0.412481	0.231	0.073	1
Col27a1	0.00337512	-3.12768	0.077	0.289	1
Pomp	0.00339206	0.629227	0.821	0.61	1
Gyg	0.00339262	0.967714	0.308	0.118	1
Coa5	0.00339275	1.02531	0.359	0.154	1
Rgs19	0.00340411	1.20143	0.385	0.167	1
mt-Nd4	0.00344127	0.556159	0.974	0.915	1
Olfml3	0.00345477	-2.65162	0.282	0.439	1
Thg1l	0.00345781	0.573904	0.154	0.037	1
Snx16	0.00347587	1.0467	0.205	0.061	1
Rps25	0.00349348	0.596154	0.923	0.846	1
Rnf138	0.00350447	0.80445	0.385	0.167	1
Dbn1	0.00351373	0.814112	0.179	0.049	1
Crlf2	0.00352548	0.914278	0.462	0.228	1
Rpl13	0.00352947	0.5213	0.974	0.955	1
Pros1	0.0035873	-2.93366	0.077	0.289	1
Itpa	0.00359311	0.886653	0.308	0.122	1
Rab7b	0.00359801	1.82113	0.205	0.065	1
Fam50a	0.00360453	1.50796	0.41	0.22	1
Atrn	0.00363965	0.91351	0.282	0.102	1
Emilin1	0.00364223	0.355593	0.154	0.037	1
Hpf1	0.00365361	0.942752	0.513	0.289	1
Tmem173	0.00367312	-2.72255	0.128	0.333	1
Vars	0.00367404	1.18512	0.359	0.154	1
Alg2	0.00368077	0.609727	0.179	0.049	1
Eid1	0.00371831	0.405772	0.641	0.333	1
Sept11	0.00375462	0.64395	0.41	0.183	1
Mtfr1l	0.00375649	0.45742	0.359	0.142	1
Sephs2	0.00375985	0.726333	0.333	0.134	1
Npm3	0.00377557	1.29648	0.333	0.146	1
Supt3	0.00378413	0.875447	0.205	0.061	1
Lag3	0.00380444	-3.11652	0.077	0.285	1
Itsn1	0.00380998	1.02596	0.359	0.159	1
Ccdc28a	0.00382173	2.37904	0.179	0.053	1
Nubp1	0.00382502	0.737398	0.41	0.183	1
Mak16	0.00382822	0.78439	0.385	0.163	1
Slc11a2	0.00383365	0.287668	0.231	0.073	1
Gde1	0.0038435	0.640321	0.513	0.248	1
Syngr1	0.00388326	0.623958	0.641	0.366	1
Hspa9	0.00388942	0.46321	0.538	0.268	1
Cmtr1	0.0039119	0.317263	0.308	0.118	1
Spc24	0.00391473	0.318338	0.179	0.049	1
Trappc1	0.00393738	0.474078	0.359	0.154	1
Pop7	0.00396025	1.00383	0.308	0.122	1
Rbm42	0.00398092	1.08759	0.513	0.26	1
Ms4a6c	0.0039865	0.735255	0.538	0.321	1
Triap1	0.00399582	0.898953	0.436	0.195	1
C130071C03Rik	0.00402708	1.47831	0.282	0.11	1
As3mt	0.00403233	1.26293	0.256	0.093	1
Psmd3	0.00403434	0.382639	0.462	0.199	1
Cox19	0.0040379	0.666819	0.333	0.138	1
Rap2b	0.00407197	1.27427	0.41	0.195	1
Stam2	0.00410577	0.867769	0.282	0.106	1
Atp5j2	0.00411465	0.495897	0.897	0.646	1
Dnttip1	0.00413014	0.853486	0.308	0.118	1
Dhx29	0.00414594	0.607783	0.231	0.073	1
Trip12	0.00415072	0.839058	0.538	0.268	1
Lsm12	0.00416918	0.693019	0.59	0.305	1
Galk1	0.00419137	0.76293	0.256	0.089	1
Rps23	0.00420648	0.466458	1	0.927	1
Idh2	0.00422262	0.396598	0.59	0.309	1
Gins4	0.00422695	0.21454	0.282	0.102	1
Pacsin1	0.00426126	-3.92518	0.026	0.215	1
F2r	0.00426562	1.79723	0.128	0.028	1
Hmgn5	0.00428037	0.40212	0.231	0.077	1
Sae1	0.00428336	0.949848	0.359	0.159	1
Topbp1	0.00429561	0.963879	0.282	0.106	1
Nsg2	0.00431263	0.75921	0.308	0.118	1
Rrp8	0.00432457	0.176686	0.282	0.102	1
Slbp	0.00433776	0.720182	0.436	0.191	1
Thrsp	0.00434365	-4.4844	0	0.179	1
Sulf2	0.00434463	1.53429	0.231	0.081	1
Zfp593	0.0043453	0.775437	0.256	0.089	1
Spag5	0.00434711	1.80484	0.128	0.028	1
Kxd1	0.00435351	1.19019	0.462	0.24	1
Lima1	0.00435576	1.16689	0.308	0.126	1
Unc119	0.00439774	0.698607	0.256	0.089	1
Tcp1	0.00442354	0.83955	0.538	0.305	1
Nolc1	0.00442637	0.754621	0.333	0.138	1
Depdc1a	0.00443	1.34279	0.128	0.028	1
Ube2c	0.00443875	0.174246	0.333	0.13	1
Nup50	0.00444317	0.890539	0.282	0.106	1
Nelfe	0.00445075	0.722449	0.256	0.089	1
S100a13	0.00447109	0.778948	0.538	0.272	1
Dab2	0.00449802	0.433278	0.385	0.175	1
Ndufa1	0.00450472	0.728011	0.718	0.427	1
Calb2	0.00451032	-2.73105	0.051	0.256	1
Cib1	0.00453562	0.603743	0.41	0.175	1
Uba3	0.00454408	1.03763	0.282	0.106	1
Lig1	0.0045455	0.909633	0.205	0.065	1
Mrps28	0.00456026	0.928916	0.359	0.154	1
Irf2	0.00456071	-0.956887	0.256	0.488	1
Trmt6	0.00458713	0.5238	0.359	0.146	1
Prxl2b	0.00459006	0.937464	0.436	0.211	1
Mettl8	0.0046001	1.50442	0.128	0.028	1
Pik3r3	0.0046001	1.75427	0.128	0.028	1
Zfp580	0.00463851	1.09226	0.179	0.053	1
Snap25	0.00464107	-2.63718	0.231	0.431	1
Usp39	0.00467069	1.11247	0.205	0.065	1
Cox4i1	0.00468142	0.287317	0.923	0.805	1
Btg1	0.0046818	-0.497374	0.795	0.809	1
Ccdc66	0.00471665	1.50653	0.205	0.069	1
Ywhaq	0.00472359	0.775942	0.692	0.435	1
Tipin	0.00472535	1.17715	0.256	0.098	1
Dna2	0.00473445	1.03279	0.205	0.065	1
Sord	0.00473823	0.891594	0.308	0.126	1
Ccl6	0.00475027	-3.40156	0.077	0.28	1
Mien1	0.00476068	0.587142	0.59	0.313	1
Hirip3	0.00478965	0.157978	0.282	0.102	1
Rrm1	0.00481141	0.862298	0.282	0.11	1
Mrpl42	0.00481205	0.674557	0.41	0.183	1
Pheta1	0.00483726	2.20809	0.154	0.041	1
Arhgap5	0.00485982	-2.05768	0.462	0.549	1
Plxnc1	0.00486079	0.977278	0.231	0.081	1
Stub1	0.00486623	1.14059	0.564	0.346	1
Setdb2	0.00486636	0.821134	0.128	0.028	1
Wdfy4	0.00487168	1.26216	0.256	0.093	1
Smg1	0.0048966	-2.25856	0.231	0.411	1
Wdr46	0.00490835	2.18691	0.205	0.069	1
Armc1	0.00491493	0.726198	0.487	0.236	1
Aarsd1	0.00492464	0.423976	0.41	0.187	1
Apool	0.00492904	0.482555	0.256	0.093	1
Eef2	0.00493397	0.615016	0.897	0.715	1
Trp53	0.00494378	0.601543	0.436	0.207	1
Smc2	0.00496098	0.776119	0.41	0.195	1
Dclre1b	0.00499755	0.980002	0.154	0.041	1
Acot1	0.00499755	1.5067	0.154	0.041	1
Trim28	0.00500458	0.687903	0.538	0.28	1
Ndufb9	0.00500803	0.401924	0.872	0.581	1
Apex1	0.00500804	0.608147	0.385	0.171	1
Maco1	0.00502752	0.529791	0.385	0.175	1
Coro1c	0.00503896	0.676541	0.487	0.236	1
Acp1	0.00504407	0.375996	0.513	0.244	1
Ntmt1	0.0050448	1.20363	0.231	0.081	1
Cenph	0.00505154	1.13542	0.128	0.028	1
Plaat3	0.00505826	0.618756	0.308	0.122	1
Kptn	0.00506632	0.66707	0.179	0.053	1
Nit2	0.00506632	1.03191	0.179	0.053	1
Usp5	0.00509756	1.31463	0.308	0.126	1
Fth1	0.00512325	0.441382	1	0.967	1
Dynll1	0.00513378	0.443804	0.846	0.65	1
Ctss	0.00514432	-1.35213	0.821	0.74	1
Fktn	0.00514649	0.66671	0.128	0.028	1
Blvrb	0.00515977	0.890814	0.513	0.293	1
Nudt21	0.00516581	0.577729	0.487	0.236	1
Dcaf7	0.00517088	0.605384	0.359	0.154	1
Mrps33	0.00520149	0.76515	0.641	0.374	1
Slc38a6	0.00522515	0.13599	0.256	0.093	1
Txnrd1	0.00523216	0.946581	0.41	0.195	1
Usp14	0.0052875	0.390347	0.462	0.224	1
Lcp1	0.00528883	0.813137	0.744	0.537	1
Cyp20a1	0.0053185	0.463083	0.256	0.089	1
Nsmce2	0.00538358	1.07687	0.385	0.183	1
Ccpg1	0.00538617	-2.06211	0.103	0.313	1
Cdkn1a	0.0054005	2.46326	0.436	0.232	1
Naa20	0.00540944	0.38756	0.513	0.264	1
1110012L19Rik	0.00541674	1.81859	0.205	0.065	1
Pbk	0.00544111	0.687029	0.128	0.028	1
Apip	0.00545464	1.03377	0.282	0.118	1
Dynlt3	0.00548176	1.11399	0.385	0.183	1
Fam136a	0.00548818	0.985151	0.256	0.098	1
Cbln3	0.0055004	-5.15793	0	0.171	1
Stambpl1	0.0055004	-3.94222	0	0.171	1
Tmem9b	0.00551057	0.941762	0.359	0.163	1
Nans	0.00552942	0.960744	0.359	0.154	1
Rcc2	0.0055401	0.846331	0.513	0.264	1
Kif15	0.0055971	0.606264	0.154	0.041	1
Lrpap1	0.00561016	0.555896	0.615	0.321	1
Thbs1	0.00561029	0.282872	0.179	0.053	1
Ufc1	0.00563114	0.619596	0.59	0.325	1
1110038B12Rik	0.00563902	0.595501	0.513	0.26	1
Snhg3	0.00566672	0.694566	0.256	0.093	1
Nacc2	0.00573433	0.533045	0.308	0.122	1
Uqcc2	0.00575497	0.504845	0.615	0.341	1
Srp9	0.00577486	0.54813	0.718	0.451	1
Hey1	0.00577993	0.440646	0.154	0.041	1
E130114P18Rik	0.00577993	1.26055	0.154	0.041	1
Noc4l	0.00579014	1.07448	0.205	0.065	1
Nucb2	0.00580783	1.70219	0.256	0.102	1
Fxyd5	0.00581313	0.388687	0.615	0.325	1
Cct3	0.00581778	0.91686	0.667	0.415	1
Pnkp	0.00581819	1.45892	0.308	0.134	1
Sdf2l1	0.00583122	1.04432	0.59	0.321	1
Cyc1	0.00584935	0.895491	0.641	0.37	1
Ube2n	0.0058679	0.663859	0.615	0.366	1
Mrps34	0.00590422	0.381619	0.487	0.232	1
Il6st	0.0059153	-2.6807	0.154	0.346	1
Trappc2l	0.00591958	0.87653	0.564	0.297	1
Tuba1a	0.00593884	0.581949	0.821	0.549	1
Skiv2l	0.00595486	1.45942	0.231	0.085	1
Hras	0.0059738	0.36732	0.487	0.24	1
Osbpl8	0.00597561	0.490916	0.436	0.207	1
Rab9	0.00599272	0.317639	0.41	0.187	1
Atf7ip	0.00600726	-2.56958	0.154	0.346	1
Tmem208	0.00603722	0.590469	0.615	0.346	1
Gtf2h1	0.00603736	0.77741	0.333	0.138	1
Sars	0.00606772	0.858835	0.487	0.268	1
Nav1	0.00607762	1.19203	0.462	0.256	1
Casp4	0.00607963	1.13665	0.256	0.098	1
Rpl23a	0.00612918	0.539638	0.846	0.63	1
Dctd	0.00613451	2.5721	0.103	0.02	1
Hccs	0.00616049	0.964806	0.282	0.114	1
Pwp2	0.00616183	0.762093	0.154	0.041	1
Cd34	0.00618446	-4.21877	0	0.167	1
Cacnb4	0.00618447	-4.77256	0	0.167	1
Ccl5	0.00618447	-7.80818	0	0.167	1
Rpl22l1	0.00619248	0.508928	0.923	0.667	1
Atad5	0.00620641	0.224729	0.179	0.053	1
Birc5	0.0062116	1.14255	0.231	0.081	1
Cdc42ep3	0.0062116	0.786842	0.231	0.081	1
Arhgdib	0.00627025	0.697303	0.795	0.569	1
Rmi1	0.0062838	0.40639	0.256	0.093	1
Wfdc17	0.00629373	-0.126017	0.308	0.122	1
Tubb6	0.00631813	2.68162	0.154	0.045	1
Adgre1	0.00632105	0.675397	0.59	0.337	1
Erp44	0.00632409	0.901945	0.385	0.179	1
Ddost	0.00632858	0.47396	0.641	0.37	1
Twf1	0.00633941	1.08085	0.359	0.163	1
Pus1	0.00635597	0.496481	0.256	0.093	1
Kars	0.00635597	0.794221	0.256	0.093	1
Pno1	0.00636046	0.883397	0.256	0.098	1
Fbxo28	0.00637687	1.54568	0.205	0.069	1
Rpn2	0.00637855	0.273353	0.718	0.382	1
Cdkn2aipnl	0.00638427	0.943621	0.282	0.11	1
1810037I17Rik	0.00638655	0.636996	0.641	0.411	1
Ccdc90b	0.00639247	1.09006	0.282	0.118	1
Col9a3	0.00639716	2.67558	0.103	0.02	1
Psrc1	0.00639716	2.7121	0.103	0.02	1
Zfp709	0.00639716	3.06074	0.103	0.02	1
Hist1h3a	0.00639716	2.37849	0.103	0.02	1
Cip2a	0.00639716	1.73353	0.103	0.02	1
Hspa1b	0.0064036	-3.35406	0.154	0.35	1
Btbd10	0.00643603	0.500146	0.205	0.065	1
Smox	0.0064455	0.68641	0.41	0.191	1
Mpi	0.00646301	0.605057	0.154	0.041	1
Arhgap45	0.00648272	-1.34801	0.41	0.589	1
Tacc3	0.00649491	1.74705	0.179	0.057	1
Farsb	0.00649643	1.19539	0.282	0.114	1
Capg	0.00650458	1.11856	0.359	0.175	1
Fbxo33	0.00652413	0.681319	0.308	0.126	1
Gm2000	0.00655098	1.39816	0.231	0.085	1
Lamtor5	0.00656204	0.866325	0.538	0.317	1
Apmap	0.00656526	2.357	0.179	0.061	1
Pde12	0.00656631	0.744415	0.154	0.041	1
Slc35b2	0.00658152	0.437364	0.41	0.183	1
Ralgds	0.00659828	0.930195	0.231	0.081	1
Ubl4a	0.00661537	0.750453	0.333	0.142	1
Tubb2b	0.00667283	0.331209	0.487	0.232	1
Psmb8	0.00668441	0.53532	0.744	0.451	1
Mpp1	0.00674409	1.28573	0.359	0.175	1
Washc1	0.00674776	0.882523	0.308	0.13	1
Dnm1	0.0067549	-3.74967	0.026	0.203	1
Cactin	0.00678269	0.535124	0.205	0.065	1
Rmc1	0.00680098	1.77273	0.205	0.069	1
Mycn	0.00681014	1.90959	0.103	0.02	1
Samm50	0.00686799	0.313072	0.513	0.26	1
Hbb-bt	0.00694985	-4.12542	0	0.163	1
Exo1	0.00695303	1.42009	0.103	0.02	1
Dpf1	0.00695303	1.79036	0.103	0.02	1
Osgin1	0.00695303	1.01865	0.103	0.02	1
Rbm24	0.00695303	1.63837	0.103	0.02	1
Lonp1	0.00695739	0.624937	0.256	0.098	1
Timm13	0.00696096	0.731669	0.692	0.459	1
Lrrn1	0.00696455	3.4383	0.128	0.033	1
Smarce1	0.00697535	0.492907	0.462	0.228	1
1600002K03Rik	0.0069776	1.42137	0.205	0.069	1
Mydgf	0.00698275	0.861147	0.564	0.317	1
Gpr89	0.00706745	0.843775	0.205	0.069	1
Snx8	0.00706832	1.66507	0.282	0.114	1
Mthfs	0.00706832	1.00548	0.282	0.114	1
Asns	0.00715868	1.06077	0.179	0.057	1
Timp2	0.00716507	0.965165	0.641	0.484	1
Nedd8	0.00720864	0.437399	0.744	0.533	1
Cdc37	0.00720931	0.808701	0.641	0.386	1
Pmvk	0.00721817	0.19645	0.282	0.114	1
Ndufa2	0.00723022	0.338006	0.821	0.549	1
Prom1	0.00724246	4.73119	0.051	0.004	1
Grm5	0.00724246	4.82672	0.051	0.004	1
Dkk3	0.00724246	4.36732	0.051	0.004	1
Dpep2	0.00724246	3.41981	0.051	0.004	1
Hic1	0.00724246	3.58517	0.051	0.004	1
Arhgap27os2	0.00724246	3.44566	0.051	0.004	1
Hist1h2bl	0.00724246	3.52163	0.051	0.004	1
Usp54	0.00724246	4.64532	0.051	0.004	1
Gm16835	0.00724246	3.92314	0.051	0.004	1
Ptprf	0.00724692	1.45059	0.103	0.02	1
Map6	0.00724692	0.740215	0.103	0.02	1
Ccdc58	0.00725832	1.18203	0.179	0.057	1
Cxxc1	0.00727594	0.876207	0.359	0.159	1
Npl	0.00728783	1.01358	0.513	0.329	1
Pfdn1	0.00729569	0.44167	0.564	0.289	1
Tpm4	0.00731013	0.811958	0.538	0.313	1
Asph	0.0073569	-1.8165	0.359	0.488	1
Tspan3	0.00736424	0.493739	0.564	0.297	1
Rex1bd	0.00736427	0.572638	0.564	0.309	1
Ltv1	0.00737088	0.955164	0.282	0.114	1
Cdk16	0.00738915	0.931999	0.308	0.134	1
Cercam	0.007398	1.38083	0.103	0.02	1
Lsm3	0.00740329	0.335207	0.41	0.191	1
Sec61g	0.00742024	0.554744	0.821	0.561	1
Nap1l1	0.00742557	0.698879	0.667	0.459	1
Cald1	0.00743732	0.881612	0.205	0.069	1
Rpusd4	0.00746133	0.939552	0.179	0.057	1
Mybl1	0.00750296	3.27313	0.051	0.004	1
A430018G15Rik	0.00750296	3.00251	0.051	0.004	1
Fabp4	0.00750296	3.75841	0.051	0.004	1
Orc1	0.00750296	3.2348	0.051	0.004	1
Pafah2	0.00750296	3.3534	0.051	0.004	1
Vgf	0.00750296	3.3696	0.051	0.004	1
Foxp2	0.00750296	3.47613	0.051	0.004	1
Klhl35	0.00750296	2.99367	0.051	0.004	1
Zbtb39	0.00750296	2.97405	0.051	0.004	1
Ace	0.00750296	3.1944	0.051	0.004	1
Pcdhb17	0.00750296	4.58037	0.051	0.004	1
Onecut2	0.00750296	3.61001	0.051	0.004	1
Zbtb3	0.00750296	3.15046	0.051	0.004	1
Fads3	0.00750296	3.71489	0.051	0.004	1
Manf	0.00750942	0.598755	0.692	0.443	1
Prkrip1	0.00752613	0.568942	0.231	0.081	1
Ltbr	0.00752613	0.849213	0.231	0.081	1
Acd	0.00752613	0.146469	0.231	0.081	1
Txnip	0.00752754	-1.30582	0.462	0.626	1
Dynlrb1	0.00755067	0.492312	0.59	0.309	1
Foxm1	0.0075519	1.19197	0.103	0.02	1
Hist1h3c	0.0075519	1.04159	0.103	0.02	1
Tmem38b	0.0075928	1.78861	0.154	0.045	1
Zkscan6	0.0075928	1.59617	0.154	0.045	1
Polh	0.0075939	2.14057	0.128	0.033	1
Zxdb	0.0075939	2.26697	0.128	0.033	1
Smim15	0.00764583	1.01058	0.436	0.224	1
Kif20b	0.00766943	1.44333	0.179	0.057	1
Cmtm6	0.0076996	-1.57551	0.333	0.48	1
Rrp15	0.00770244	0.336872	0.256	0.093	1
B3gnt8	0.00770867	0.871543	0.103	0.02	1
Cenpu	0.00770867	0.71014	0.103	0.02	1
Enkd1	0.00770867	0.887198	0.103	0.02	1
Malsu1	0.00772334	0.362483	0.436	0.199	1
Limk1	0.00772602	1.39053	0.205	0.069	1
Cmss1	0.00772602	0.582567	0.205	0.069	1
Angptl2	0.00777184	1.96762	0.051	0.004	1
Cbln4	0.00777184	3.05797	0.051	0.004	1
Rab25	0.00777184	1.54366	0.051	0.004	1
4930570G19Rik	0.00777184	1.68528	0.051	0.004	1
1700123M08Rik	0.00777184	1.31767	0.051	0.004	1
Foxo6	0.00777184	1.85388	0.051	0.004	1
Aunip	0.00777184	2.68659	0.051	0.004	1
Pdpn	0.00777184	1.88507	0.051	0.004	1
Fam222a	0.00777184	1.01212	0.051	0.004	1
Eln	0.00777184	2.46349	0.051	0.004	1
Pparg	0.00777184	2.90397	0.051	0.004	1
Zfp383	0.00777184	3.08693	0.051	0.004	1
Igdcc4	0.00777184	2.81745	0.051	0.004	1
Cdhr4	0.00777184	2.25806	0.051	0.004	1
Aldh1l2	0.00777184	1.40048	0.051	0.004	1
Gm15892	0.00777184	2.91447	0.051	0.004	1
Adarb2	0.00777184	2.58114	0.051	0.004	1
Hist1h2an	0.00777184	2.34076	0.051	0.004	1
Gm20667	0.00777184	2.86108	0.051	0.004	1
Matn2	0.00777184	2.71496	0.051	0.004	1
Gm49463	0.00777184	2.92754	0.051	0.004	1
Map3k13	0.00777184	2.50111	0.051	0.004	1
1700007L15Rik	0.00777184	2.68166	0.051	0.004	1
Eva1c	0.00777184	2.13717	0.051	0.004	1
4833427F10Rik	0.00777184	2.45813	0.051	0.004	1
Gm10053	0.00777184	2.47084	0.051	0.004	1
Prrg1	0.00777184	2.00562	0.051	0.004	1
Ildr1	0.00777184	2.65108	0.051	0.004	1
Washc5	0.00777407	0.790347	0.256	0.098	1
Adrb1	0.00780586	-4.45013	0	0.159	1
Scrib	0.0078151	1.16797	0.231	0.085	1
Pqlc2	0.00782636	1.93932	0.154	0.045	1
Gngt2	0.00784486	0.815186	0.513	0.268	1
Polr3k	0.00786373	0.547527	0.333	0.142	1
Actn1	0.00786796	0.779995	0.282	0.118	1
Tmem121	0.00786835	0.587187	0.103	0.02	1
Sec61a1	0.00787636	0.208245	0.462	0.228	1
Tmem97	0.00788271	1.3578	0.179	0.057	1
Cops5	0.00789214	0.773277	0.385	0.179	1
Pabpc1	0.00790559	0.509114	0.872	0.707	1
Hax1	0.00791369	0.909727	0.256	0.102	1
Slc30a7	0.00792402	0.583013	0.205	0.069	1
Hcfc1	0.00796313	0.617016	0.385	0.175	1
Eif2b5	0.00801357	0.317647	0.282	0.106	1
Tmem183a	0.00801471	0.785814	0.333	0.142	1
Slc7a1	0.00802472	0.594856	0.205	0.069	1
Rpl10-ps3	0.00802472	0.922917	0.205	0.069	1
Srd5a3	0.00803112	1.16149	0.282	0.118	1
Gtf2e2	0.00804321	0.360858	0.41	0.183	1
Pole4	0.00806692	0.841197	0.41	0.195	1
Rala	0.00807187	0.531213	0.487	0.26	1
Cst3	0.00810681	-1.4002	0.872	0.85	1
Gtpbp1	0.00812656	0.730825	0.205	0.069	1
Guk1	0.00813149	0.700628	0.41	0.199	1
Selenow	0.00813247	0.563863	0.769	0.504	1
Hs2st1	0.00816139	-0.119725	0.308	0.118	1
2010001A14Rik	0.00817281	4.31345	0.077	0.012	1
Anxa2	0.00824557	0.820103	0.333	0.146	1
Slc25a37	0.00826777	0.127677	0.359	0.154	1
Ilkap	0.00829081	0.695646	0.436	0.207	1
Tmem119	0.00830649	-1.94495	0.282	0.447	1
Zfp704	0.00831319	1.12443	0.333	0.15	1
Pkm	0.00831587	0.515318	0.769	0.528	1
Eif2s1	0.00832924	0.195792	0.615	0.321	1
Crcp	0.00833371	0.674852	0.205	0.069	1
Nudt9	0.00833908	0.856338	0.41	0.199	1
Agfg1	0.00834406	0.687648	0.41	0.191	1
Mt2	0.00839218	0.190326	0.308	0.13	1
Kmt5a	0.00839834	0.450536	0.462	0.228	1
Lage3	0.00840932	0.652667	0.41	0.199	1
Hebp1	0.00841028	0.753131	0.641	0.398	1
Kctd10	0.00843935	0.859907	0.179	0.057	1
Heatr5a	0.00845119	-2.41373	0.051	0.236	1
Slc1a3	0.00846949	-1.80917	0.051	0.24	1
Scand1	0.00847519	0.544143	0.769	0.561	1
Acyp1	0.00848336	0.643129	0.333	0.142	1
Sf3b5	0.0085154	0.580232	0.564	0.313	1
Dynlt1a	0.0085548	1.1684	0.179	0.057	1
Yipf1	0.00855486	0.838528	0.359	0.167	1
Hnrnpa1	0.00855955	0.515876	0.744	0.606	1
Nup43	0.00856064	1.21642	0.128	0.033	1
Rpl31	0.0085641	0.512767	0.769	0.667	1
Mmp2	0.0085661	1.71513	0.154	0.045	1
Fanca	0.00858818	3.49904	0.077	0.012	1
Rhoc	0.00860599	1.12368	0.333	0.154	1
Selenof	0.00863055	0.401219	0.846	0.675	1
Cd44	0.00863509	1.07784	0.308	0.126	1
Pafah1b3	0.00865486	0.422396	0.359	0.159	1
Nrcam	0.00867167	0.857073	0.179	0.057	1
Galc	0.00870061	0.852149	0.282	0.114	1
Mcm4	0.00871004	1.73122	0.179	0.061	1
Bccip	0.00872209	0.585082	0.333	0.146	1
Emc6	0.00876756	0.239382	0.615	0.337	1
Cryzl2	0.00878996	1.08938	0.179	0.057	1
Ifi204	0.00878996	0.939081	0.179	0.057	1
Rfng	0.00878996	1.05887	0.179	0.057	1
B9d1	0.00880286	2.74776	0.077	0.012	1
Car5b	0.00880286	1.10119	0.077	0.012	1
Rnf181	0.00881753	1.01272	0.256	0.102	1
Acot9	0.00882134	1.62815	0.205	0.073	1
1700003F12Rik	0.00882623	1.33206	0.154	0.045	1
Rps15	0.00888551	0.540476	0.846	0.732	1
Psmd4	0.00895458	0.164215	0.692	0.382	1
Sdhaf4	0.00896946	0.860232	0.333	0.146	1
Tcp11l1	0.00900761	1.45011	0.128	0.033	1
Dcc	0.00900761	1.5946	0.128	0.033	1
Mcm10	0.00902232	1.57839	0.077	0.012	1
Gnasas1	0.00902232	3.2422	0.077	0.012	1
Gnaz	0.00902232	1.33859	0.077	0.012	1
Rab1a	0.00905185	0.472399	0.667	0.374	1
Lair1	0.00905636	-2.19974	0.333	0.459	1
Lmna	0.00907528	0.87238	0.282	0.118	1
Sdccag8	0.00908296	0.834336	0.231	0.085	1
Mphosph6	0.00915153	1.33618	0.205	0.073	1
Zfp598	0.00915153	1.31248	0.205	0.073	1
Ranbp3	0.00916002	0.133017	0.308	0.126	1
Ccnf	0.00916117	1.40135	0.128	0.033	1
Dcps	0.00916235	0.699103	0.308	0.13	1
Sall1	0.00916655	-2.50773	0.103	0.285	1
Atp6v1h	0.00922458	0.606391	0.436	0.207	1
Atp6v0d1	0.00922927	0.802186	0.59	0.35	1
Plppr1	0.00924666	1.08464	0.077	0.012	1
Aplf	0.00924666	2.62166	0.077	0.012	1
Smim18	0.00924666	1.54794	0.077	0.012	1
2410002F23Rik	0.00926037	0.557112	0.256	0.098	1
Uchl1	0.00926402	1.25987	0.205	0.073	1
Chek2	0.00926402	0.73126	0.205	0.073	1
Polr1e	0.00927767	0.954546	0.179	0.057	1
Prps2	0.00934697	0.54452	0.282	0.114	1
Snrpd3	0.00934941	0.385026	0.59	0.317	1
Cep57l1	0.00936775	1.09727	0.154	0.045	1
Gm17066	0.00936775	1.33724	0.154	0.045	1
Tmem256	0.0093963	0.515034	0.641	0.374	1
N6amt1	0.00940331	0.834129	0.179	0.057	1
Mgmt	0.00947531	1.47405	0.128	0.033	1
Mdm1	0.00947531	1.28654	0.128	0.033	1
Slc43a3	0.00947595	1.48729	0.077	0.012	1
Celf6	0.00947595	1.45546	0.077	0.012	1
Aars2	0.00947595	2.25259	0.077	0.012	1
Mphosph10	0.00948515	0.915743	0.359	0.171	1
Nedd9	0.00950844	0.933604	0.231	0.085	1
Mcrs1	0.00950915	0.883379	0.385	0.195	1
Rbm7	0.00951915	0.522994	0.436	0.22	1
Pdap1	0.00957985	0.418978	0.641	0.354	1
Prrc2b	0.00967266	0.446396	0.436	0.22	1
Mybl2	0.00971031	1.72769	0.077	0.012	1
Neurod6	0.00971031	1.09909	0.077	0.012	1
Gen1	0.00971031	1.26928	0.077	0.012	1
Zfp41	0.00971031	2.19315	0.077	0.012	1
Tnfsf13	0.00972643	1.71219	0.205	0.073	1
Incenp	0.00972777	0.742389	0.231	0.085	1
Qars	0.00981365	0.999805	0.308	0.142	1
Smarcad1	0.00981572	0.24245	0.359	0.159	1
Gabra6	0.00983224	-4.80022	0	0.15	1
Gng13	0.00983224	-4.31518	0	0.15	1
Rtn1	0.0098474	0.70665	0.59	0.362	1
Arl5a	0.00988507	0.6886	0.359	0.163	1
Hspa4l	0.00989927	0.285886	0.308	0.13	1
Stradb	0.00992118	0.57943	0.179	0.057	1
Ninj1	0.0099227	0.558206	0.462	0.24	1
AC149090.1	0.00992292	-1.36729	0.41	0.537	1
Prpf38a	0.00993094	0.543137	0.333	0.146	1
Pdgfra	0.00994982	1.9058	0.077	0.012	1
Galm	0.00994982	1.3209	0.077	0.012	1
Aldoc	0.00995256	-4.13827	0.026	0.187	1
Tyw5	0.00996454	0.617108	0.128	0.033	1
Ncapg	0.00996454	0.756707	0.128	0.033	1
Mrps24	0.00998363	0.514537	0.615	0.358	1
Sart1	0.00999602	1.04143	0.359	0.171	1
S100a11	0.0100056	0.697264	0.41	0.211	1
Akap8l	0.0100074	-1.69004	0.256	0.423	1
Bloc1s4	0.0100231	0.842459	0.256	0.102	1
Gpr34	0.0100591	-2.39083	0.487	0.533	1
Cct5	0.0101595	0.724193	0.641	0.415	1
Esco2	0.0101895	0.490263	0.179	0.057	1
1700001O22Rik	0.0101946	1.05641	0.077	0.012	1
Ncln	0.0102078	0.3556	0.41	0.191	1
Id1	0.0103031	0.186703	0.128	0.033	1
Tox3	0.0103031	0.489953	0.128	0.033	1
mt-Cytb	0.0103191	0.64052	1	0.972	1
Tusc1	0.0103333	1.0475	0.205	0.073	1
Isca2	0.0103463	0.456093	0.41	0.199	1
Gdi2	0.0103536	0.602082	0.795	0.667	1
Sec61a2	0.0103647	1.45864	0.231	0.089	1
Rexo2	0.01037	0.766915	0.538	0.317	1
Tasor	0.0104325	-3.1629	0.103	0.272	1
Nup214	0.0104494	0.722474	0.282	0.114	1
Rab3d	0.0104762	1.10712	0.128	0.033	1
Erh	0.0105081	0.342882	0.564	0.321	1
Kif5b	0.0105156	0.66009	0.718	0.492	1
Cfap36	0.0105251	1.17691	0.308	0.138	1
Oaz1	0.0105426	0.326108	0.923	0.858	1
Ell	0.0105853	1.19451	0.205	0.073	1
Hacd1	0.0106051	1.278	0.179	0.061	1
Ccr5	0.010623	-2.28977	0.308	0.447	1
Nme6	0.0106518	0.755912	0.128	0.033	1
Golga7	0.0108086	0.48276	0.462	0.236	1
Ppp1r35	0.0108411	0.938184	0.333	0.159	1
Kti12	0.0108428	1.10379	0.205	0.073	1
Trak1	0.010866	0.67115	0.308	0.134	1
Plec	0.0108692	0.785162	0.282	0.118	1
Rest	0.0108732	0.600877	0.385	0.187	1
Lifr	0.010878	-2.53271	0.051	0.228	1
Dad1	0.0109461	0.445879	0.769	0.541	1
Cep250	0.0109776	0.881194	0.282	0.118	1
Snf8	0.0110061	0.229294	0.615	0.317	1
Crtap	0.011011	1.11174	0.128	0.033	1
Gm2629	0.0110269	-4.67142	0	0.146	1
Pih1d1	0.0110836	0.790915	0.333	0.146	1
Maff	0.0110976	1.60788	0.205	0.077	1
Nup155	0.0111058	0.250387	0.205	0.073	1
Mrpl36	0.011151	0.3876	0.462	0.232	1
Rps4x	0.0111718	0.514447	0.974	0.915	1
Hmmr	0.0111744	0.194263	0.154	0.045	1
Trerf1	0.0111803	0.698326	0.179	0.057	1
Znrd2	0.0111805	0.360002	0.359	0.163	1
Swi5	0.0112254	0.560888	0.641	0.386	1
Fgd2	0.0112338	-2.07704	0.231	0.394	1
Uggt1	0.0112375	0.707127	0.359	0.167	1
Tubb2a	0.0112422	0.348685	0.538	0.297	1
Zcrb1	0.0112896	0.78612	0.538	0.354	1
Lancl1	0.0113372	1.86831	0.154	0.049	1
Mertk	0.011351	-1.89382	0.333	0.459	1
Pgd	0.0114322	0.592559	0.487	0.256	1
Traf2	0.0114606	1.43476	0.179	0.061	1
Rpl29	0.0114813	0.638092	0.821	0.732	1
Osbpl3	0.0115039	0.349584	0.154	0.045	1
Sh2b1	0.0115333	0.924658	0.308	0.13	1
Lsm8	0.0115749	0.514757	0.436	0.224	1
Isy1	0.0116056	0.683339	0.308	0.134	1
Spn	0.0116089	1.33293	0.179	0.061	1
Gm6377	0.0116118	0.904814	0.256	0.106	1
Copg2	0.0116134	0.801605	0.256	0.102	1
Commd10	0.0116134	0.422927	0.256	0.102	1
S100a4	0.0116135	1.21116	0.282	0.122	1
Csnk2b	0.011636	0.848748	0.564	0.325	1
Mrpl32	0.011643	0.370821	0.436	0.211	1
Alkbh8	0.011651	0.562965	0.231	0.085	1
Alkbh2	0.011662	2.12732	0.154	0.049	1
Anxa4	0.0116762	0.98652	0.282	0.126	1
Vps72	0.0117033	0.495512	0.333	0.146	1
Uck2	0.011759	1.20077	0.179	0.061	1
Timm17b	0.0117625	0.768376	0.333	0.15	1
Zc2hc1a	0.0117884	0.295171	0.205	0.073	1
Crybg3	0.0117884	0.70455	0.205	0.073	1
Klc4	0.0117884	1.0142	0.205	0.073	1
Sap18	0.011817	0.694836	0.538	0.309	1
Hsbp1	0.0118708	0.45518	0.718	0.447	1
Pde3b	0.011922	-1.61022	0.359	0.5	1
Topors	0.0119539	0.23958	0.333	0.142	1
Nt5dc2	0.0119575	0.579275	0.282	0.122	1
Smim12	0.0119669	0.805044	0.231	0.089	1
Taf13	0.0119757	1.2426	0.256	0.106	1
Cdk6	0.0119774	0.565128	0.41	0.199	1
Arpc1a	0.0120192	0.659591	0.538	0.35	1
Cib2	0.0120643	1.21086	0.179	0.061	1
Wdr75	0.0120717	0.39977	0.205	0.073	1
Cyb5r3	0.0121451	1.11611	0.308	0.142	1
Rps17	0.012169	0.516601	0.846	0.687	1
Dhcr7	0.0122196	1.35077	0.179	0.061	1
Mrps14	0.0122563	0.874892	0.564	0.329	1
Rps9	0.0123012	0.418377	0.974	0.947	1
Csrp1	0.0123177	-0.531316	0.231	0.085	1
Dr1	0.0123292	0.740254	0.308	0.138	1
Ptpn12	0.0123498	1.03636	0.256	0.106	1
Abcb1b	0.012361	-3.52822	0	0.142	1
Maml2	0.012361	-3.92979	0	0.142	1
Atp8a2	0.012361	-4.35924	0	0.142	1
Gm45716	0.0123766	1.26958	0.179	0.061	1
Mrpl14	0.0124159	0.461264	0.385	0.187	1
Esyt1	0.012465	0.978421	0.333	0.146	1
Pigk	0.0124714	0.368676	0.385	0.183	1
Hspa1a	0.0124881	-2.08217	0.282	0.459	1
Ndufb10	0.0124914	0.385765	0.744	0.443	1
Xxylt1	0.0125079	0.561766	0.205	0.073	1
Dut	0.0126109	0.801862	0.359	0.171	1
Dgkz	0.0126812	0.533106	0.564	0.321	1
Cd38	0.0126961	0.684785	0.179	0.061	1
Trps1	0.0127396	0.503855	0.308	0.134	1
Eif2b2	0.0127778	1.03652	0.231	0.089	1
Cdk2ap1	0.0127857	0.378135	0.359	0.167	1
Slf1	0.0128586	0.783626	0.179	0.061	1
Ddx5	0.0129684	-0.41459	0.923	0.947	1
Nubp2	0.0129963	0.609807	0.256	0.106	1
Mrpl48	0.0129972	0.241006	0.385	0.183	1
1110065P20Rik	0.0130892	0.302131	0.333	0.15	1
Erlin1	0.0131112	0.398647	0.205	0.073	1
Adrb2	0.0131265	-1.80129	0.231	0.398	1
Clic1	0.0131516	0.640648	0.846	0.707	1
Kif4	0.0132656	1.69813	0.103	0.024	1
Tfg	0.0132683	0.393847	0.359	0.171	1
Siva1	0.0133272	0.540085	0.41	0.211	1
Haus4	0.0134131	1.96943	0.154	0.049	1
Vbp1	0.0135063	0.256524	0.462	0.228	1
Uba2	0.0135063	0.561434	0.436	0.232	1
Rab5c	0.0135266	0.480672	0.564	0.333	1
Tnfaip3	0.0135355	0.694725	0.513	0.289	1
Chic2	0.0135554	0.494451	0.641	0.382	1
Ap5m1	0.0135805	-0.21572	0.205	0.073	1
Rtraf	0.0136022	0.450181	0.692	0.492	1
Snrpa1	0.0136057	0.613295	0.436	0.244	1
Eif3d	0.0136063	0.709445	0.487	0.268	1
Trmt112	0.0136074	0.480145	0.692	0.439	1
Tk1	0.0136858	1.9777	0.128	0.037	1
Plin3	0.0136867	0.887178	0.308	0.146	1
Plagl2	0.0137018	0.154311	0.256	0.102	1
Ctbp1	0.0137142	0.538567	0.513	0.276	1
Ss18l2	0.0137508	0.50905	0.333	0.146	1
Fkbp5	0.0137563	-2.06663	0.205	0.37	1
Ppp1r9a	0.0137563	-2.00311	0.205	0.37	1
Ppp1ca	0.0137739	0.493484	0.795	0.569	1
Gse1	0.0138027	0.219764	0.359	0.167	1
Psmb7	0.0138085	0.441278	0.615	0.366	1
Stard7	0.0138115	0.808645	0.256	0.106	1
Pcp2	0.0138503	-4.42708	0	0.138	1
Abhd14a	0.0138725	0.732278	0.179	0.061	1
Nol4	0.0138725	0.518825	0.179	0.061	1
Maml3	0.0139224	-2.42537	0.103	0.272	1
Sp3os	0.0139516	0.577246	0.256	0.106	1
Ift20	0.0139545	0.642959	0.487	0.252	1
Elp6	0.0139818	1.19693	0.154	0.049	1
Gcsh	0.013999	1.13213	0.205	0.077	1
Eif3f	0.0140884	0.543571	0.744	0.52	1
Srgn	0.0140942	0.136598	0.667	0.48	1
Nat10	0.0141183	2.0141	0.128	0.037	1
Mageh1	0.0141183	2.39193	0.128	0.037	1
Smarcc2	0.0141493	0.37069	0.385	0.187	1
Eny2	0.0141597	0.449215	0.487	0.248	1
Ikzf5	0.0142116	0.150261	0.231	0.085	1
Tesk1	0.0142176	0.919301	0.282	0.122	1
Lockd	0.0142258	0.243777	0.179	0.061	1
Igsf9	0.0142731	2.02606	0.103	0.024	1
Srxn1	0.0142731	2.00985	0.103	0.024	1
Rpl36a-ps1	0.0142731	1.82465	0.103	0.024	1
Slfn2	0.0142996	0.564834	0.513	0.272	1
Rbm19	0.0143391	1.39423	0.128	0.037	1
Itprip	0.0143391	2.45181	0.128	0.037	1
Bpgm	0.0143728	0.71479	0.154	0.049	1
Ska2	0.0143728	1.18617	0.154	0.049	1
Srp14	0.0143739	0.530544	0.769	0.52	1
Psenen	0.0143771	0.417328	0.744	0.492	1
Shmt2	0.0143797	1.29207	0.256	0.106	1
Triobp	0.0143797	0.582791	0.256	0.106	1
Sh3glb1	0.0144503	0.482529	0.897	0.675	1
Hpgd	0.0144537	0.499705	0.359	0.175	1
9430060I03Rik	0.0145353	2.0217	0.103	0.024	1
Fsd1l	0.0145353	0.952367	0.103	0.024	1
Diaph3	0.0145353	1.63557	0.103	0.024	1
Bod1	0.0145467	0.190177	0.231	0.089	1
Gclc	0.0145789	0.38286	0.333	0.154	1
Sar1b	0.0145869	0.482406	0.59	0.346	1
Pwp1	0.0146918	1.34271	0.231	0.093	1
Rnpep	0.0147133	0.427544	0.41	0.207	1
Emc1	0.0147505	1.31696	0.256	0.11	1
Cenpx	0.014765	0.65587	0.513	0.305	1
Cd99l2	0.0147706	0.599243	0.179	0.061	1
Dcun1d3	0.0147898	2.02443	0.128	0.037	1
Carnmt1	0.0147976	0.124622	0.359	0.171	1
Arhgap33	0.0148017	1.35144	0.103	0.024	1
Akip1	0.0148216	0.898335	0.205	0.077	1
Smim27	0.0148477	1.02458	0.231	0.093	1
Zc3h18	0.0148525	0.558842	0.385	0.187	1
Grk3	0.0149089	0.973669	0.282	0.122	1
Bet1	0.014975	0.149475	0.308	0.13	1
Btbd19	0.0149772	1.27808	0.154	0.049	1
Mlxipl	0.0150159	-2.35026	0.051	0.215	1
Rbx1	0.0150379	0.635736	0.769	0.602	1
Stx11	0.0150724	1.03546	0.103	0.024	1
Piga	0.0150724	1.13469	0.103	0.024	1
Fam133b	0.015093	0.501208	0.487	0.26	1
Tmem167	0.0151301	0.687167	0.564	0.341	1
Ndufs1	0.0151422	-0.125476	0.359	0.167	1
Bora	0.015144	0.176069	0.179	0.061	1
Krcc1	0.0151735	0.578882	0.462	0.256	1
Mplkip	0.0152232	0.360656	0.333	0.154	1
Selenot	0.0152311	0.470194	0.487	0.244	1
Gan	0.0152529	2.04306	0.128	0.037	1
Ripk3	0.0152529	1.59612	0.128	0.037	1
Commd7	0.0152898	0.780345	0.538	0.329	1
Haus6	0.0153353	0.928038	0.205	0.077	1
Tor1a	0.0153382	0.545924	0.385	0.187	1
Dbf4	0.0153453	0.488248	0.231	0.089	1
Strap	0.0153771	0.727653	0.462	0.24	1
Naf1	0.0153926	1.3891	0.154	0.049	1
Gfpt1	0.0154258	0.274077	0.385	0.183	1
Baz1b	0.0154721	0.488341	0.513	0.28	1
Gadd45gip1	0.0154831	0.20812	0.282	0.122	1
Ptbp2	0.0154871	0.125187	0.359	0.163	1
Aip	0.0154878	0.780262	0.333	0.154	1
Nup37	0.01551	0.570326	0.205	0.077	1
Cd3e	0.0155124	-4.9629	0	0.134	1
Atf7	0.0155342	-3.11163	0.026	0.175	1
Exosc5	0.0155543	0.651887	0.359	0.171	1
Rsl1d1	0.0155679	0.578392	0.513	0.309	1
Ywhag	0.0155771	0.747742	0.564	0.333	1
Epop	0.0156269	0.490769	0.103	0.024	1
Sept9	0.0156334	0.671898	0.333	0.159	1
Mtor	0.0156865	0.533332	0.205	0.077	1
Pitrm1	0.0156865	0.744485	0.205	0.077	1
Polr2e	0.0156866	0.373325	0.641	0.358	1
Commd2	0.0157116	0.304995	0.385	0.187	1
Gtpbp10	0.0157287	1.10277	0.128	0.037	1
Cdt1	0.0157287	1.43074	0.128	0.037	1
Crip2	0.0157287	1.9496	0.128	0.037	1
Aaas	0.0157287	0.908604	0.128	0.037	1
Lin54	0.015755	1.70275	0.231	0.098	1
Atg3	0.0157758	0.265528	0.487	0.256	1
Rpl41	0.015838	0.30504	0.923	0.89	1
Nup205	0.0158647	0.705066	0.205	0.077	1
Acot13	0.0158756	0.774178	0.385	0.195	1
Htra2	0.0158798	0.714628	0.385	0.199	1
Anxa6	0.0158987	1.02386	0.333	0.163	1
Samd1	0.0159019	0.476507	0.308	0.138	1
Ift52	0.0159185	1.20133	0.231	0.098	1
Cnr1	0.0159802	0.403132	0.231	0.093	1
Ift57	0.0160102	-0.155429	0.231	0.085	1
Gusb	0.0160134	0.632154	0.615	0.435	1
Lsm6	0.0160336	0.249463	0.564	0.317	1
Homer3	0.0160345	0.842681	0.154	0.049	1
Mcph1	0.0160447	0.649071	0.205	0.077	1
Lrch4	0.0161446	0.12952	0.487	0.244	1
Nbas	0.0161481	0.91799	0.231	0.093	1
Ubap1	0.0161768	0.161547	0.282	0.118	1
Zfp507	0.0161993	0.852261	0.103	0.024	1
Cdca2	0.0161993	0.447664	0.103	0.024	1
Eif1ax	0.0162098	0.213504	0.513	0.264	1
Vsnl1	0.016268	-4.11086	0.026	0.171	1
Hexb	0.0163843	-1.5309	0.692	0.72	1
Dnajb11	0.0163899	0.485858	0.564	0.329	1
BC024978	0.016467	1.179	0.128	0.037	1
Acad8	0.0164755	0.262706	0.154	0.049	1
Heatr1	0.0165955	0.538781	0.205	0.077	1
Grb2	0.0166682	0.384558	0.718	0.463	1
Hdac4	0.0167071	1.58415	0.179	0.065	1
Gbp9	0.0167198	1.64604	0.128	0.037	1
Bud13	0.0167198	1.43442	0.128	0.037	1
Vrk1	0.0168003	0.461741	0.462	0.248	1
Ptpn18	0.01681	0.630107	0.795	0.537	1
Mapkapk2	0.0168767	0.506637	0.513	0.297	1
Nrxn3	0.0168802	-3.34067	0.077	0.236	1
Jun	0.0169132	-0.872212	0.795	0.817	1
Med10	0.0169569	0.623852	0.436	0.215	1
Sgcb	0.0169718	0.687803	0.205	0.077	1
Chtop	0.0170162	0.507565	0.513	0.293	1
Dap3	0.0170311	0.967696	0.359	0.179	1
Por	0.0170433	0.75847	0.308	0.15	1
Orc6	0.0170823	0.606347	0.308	0.142	1
Slc15a2	0.0170925	0.945014	0.103	0.024	1
Polr3e	0.0171569	0.450437	0.154	0.049	1
Dennd4b	0.0171679	0.966743	0.282	0.134	1
Cul4b	0.0172394	0.455566	0.231	0.089	1
5031439G07Rik	0.0172929	0.872889	0.333	0.163	1
Aurkaip1	0.0173315	0.639923	0.487	0.268	1
Cenpm	0.0174986	0.887106	0.128	0.037	1
Taldo1	0.0175434	0.361226	0.744	0.512	1
Iscu	0.0175492	0.120232	0.564	0.293	1
Cp	0.0175637	-0.495053	0.179	0.061	1
Msantd4	0.0175637	0.175998	0.179	0.061	1
Etf1	0.0176685	0.87556	0.513	0.301	1
Hsph1	0.0176757	0.447368	0.385	0.183	1
Lcorl	0.0177181	0.229617	0.333	0.146	1
Sfpq	0.0177185	0.285495	0.769	0.557	1
Stt3b	0.0177348	0.478624	0.41	0.215	1
Fh1	0.0178412	0.213129	0.385	0.187	1
Pitpnc1	0.0178585	-2.17858	0.128	0.293	1
Asrgl1	0.0179457	0.383624	0.205	0.077	1
Fabp7	0.0179559	0.648492	0.179	0.065	1
Nt5c3b	0.0179559	1.36496	0.179	0.065	1
Mtus1	0.0179771	-2.84213	0.154	0.301	1
Fam98b	0.0179823	0.273444	0.385	0.187	1
Tomm70a	0.0179823	0.355486	0.385	0.187	1
Lamtor1	0.0180031	0.578082	0.615	0.39	1
Ints6l	0.0180116	-2.03154	0.154	0.321	1
Tpgs1	0.0180321	0.555079	0.359	0.175	1
Tmem165	0.0180383	0.31031	0.41	0.199	1
Mrpl3	0.0180508	0.889323	0.333	0.159	1
Rrp1b	0.0181038	0.502817	0.154	0.049	1
Snrpb	0.0181751	0.327178	0.846	0.606	1
Btbd1	0.0181958	1.10262	0.359	0.191	1
Gtf2f2	0.0182418	0.196749	0.256	0.106	1
Fam129a	0.0182987	0.983015	0.308	0.146	1
Pja2	0.0183262	-1.33739	0.205	0.366	1
Nsun2	0.0183556	0.862578	0.333	0.159	1
Cops2	0.0184217	0.330947	0.385	0.191	1
Atp5f1	0.0184502	0.38325	0.821	0.724	1
Arglu1	0.0184675	-1.031	0.513	0.614	1
Coq10a	0.0185416	1.28813	0.205	0.081	1
Ppm1g	0.0185444	0.493617	0.487	0.26	1
4933434E20Rik	0.0185659	0.500762	0.436	0.228	1
Son	0.0185812	-0.590332	0.872	0.858	1
Capns1	0.0186033	0.506953	0.615	0.362	1
Nsmce1	0.0186826	0.213577	0.385	0.183	1
Emc8	0.0187804	0.487288	0.41	0.203	1
Tsen54	0.0188674	0.772321	0.128	0.037	1
Snrnp40	0.0188869	0.103015	0.41	0.199	1
Phb2	0.0189086	0.466372	0.59	0.358	1
4933421O10Rik	0.018914	-3.12345	0.051	0.199	1
Cep295	0.0189386	-0.320008	0.231	0.089	1
Anapc7	0.018967	0.18029	0.256	0.106	1
Decr1	0.0189681	-0.31087	0.205	0.077	1
Snx29	0.0190061	-3.17315	0.026	0.167	1
Ccdc127	0.0190093	0.797149	0.256	0.11	1
Micos10	0.0190723	0.30154	0.744	0.451	1
Cdca7	0.0191264	-0.703449	0.179	0.061	1
Eif4ebp1	0.0191376	1.30276	0.333	0.159	1
Gtf3c6	0.0191501	0.667819	0.308	0.138	1
Snx18	0.0191515	-1.89862	0.282	0.407	1
Borcs5	0.0191522	0.615472	0.128	0.037	1
Slc6a6	0.0192041	0.637246	0.564	0.354	1
Rnps1	0.0193033	0.508123	0.538	0.301	1
Tomm22	0.0193094	0.235506	0.641	0.39	1
Il6ra	0.0193132	-1.52635	0.359	0.48	1
Uap1	0.0193217	1.17164	0.231	0.098	1
Dpp3	0.0193547	0.55893	0.282	0.126	1
Gfer	0.0195311	1.22732	0.282	0.126	1
Ptpn23	0.0195761	1.1797	0.205	0.081	1
Pop5	0.0197047	0.638425	0.538	0.305	1
Taf6	0.0197478	0.543176	0.179	0.065	1
Tmem161a	0.0197478	0.609185	0.179	0.065	1
Psmc3ip	0.0197478	0.85307	0.179	0.065	1
Dnajc30	0.0198461	0.285367	0.231	0.093	1
Insm1	0.0198881	0.462429	0.282	0.126	1
Rnf19b	0.019974	0.196231	0.487	0.264	1
Ddx51	0.020029	0.268856	0.128	0.037	1
Zpr1	0.0200688	0.52572	0.282	0.126	1
Bcl2a1b	0.020084	0.742782	0.59	0.427	1
Cox18	0.0201344	0.944272	0.256	0.114	1
Ggct	0.0202195	1.05374	0.179	0.065	1
Drg1	0.0202248	0.935733	0.308	0.15	1
Pnp	0.0202341	-1.62273	0.41	0.5	1
Espl1	0.0202596	1.18129	0.154	0.053	1
Akr1c13	0.0202755	1.8946	0.128	0.041	1
Eef1e1	0.0202774	0.93772	0.333	0.171	1
Nupr1	0.0204343	0.562448	0.282	0.126	1
Cant1	0.0206192	0.962189	0.282	0.126	1
Golim4	0.0207272	0.604724	0.231	0.098	1
Tecr	0.0207357	0.356386	0.744	0.492	1
Pdlim4	0.0207481	0.983705	0.436	0.248	1
Tor1aip1	0.0208314	-0.808227	0.308	0.472	1
Sf3b3	0.0208439	0.153529	0.513	0.293	1
Zfpl1	0.0208788	0.558948	0.231	0.093	1
Slc35a3	0.0208837	0.960831	0.205	0.081	1
Mcm7	0.0209062	0.780747	0.256	0.114	1
Ppp6r1	0.0209125	0.655867	0.538	0.305	1
B3glct	0.0209454	0.807115	0.179	0.065	1
Impdh2	0.0210176	0.604178	0.333	0.175	1
Ybx3	0.0210537	0.579818	0.436	0.244	1
P2ry12	0.0211036	-1.6333	0.462	0.537	1
Tcof1	0.0211244	0.774461	0.385	0.199	1
Coprs	0.0211447	0.854779	0.231	0.098	1
Cd47	0.0211463	0.69147	0.795	0.549	1
Tsfm	0.0211677	0.504745	0.308	0.146	1
Sfxn1	0.0211677	0.682675	0.308	0.146	1
Zfp524	0.0211923	1.21041	0.179	0.065	1
Chmp7	0.0211923	1.43739	0.179	0.065	1
Srsf1	0.0212466	0.210457	0.462	0.248	1
Ighm	0.0212768	-1.47901	0.333	0.484	1
Ide	0.0213137	0.194844	0.256	0.11	1
Ctnnb1	0.0213328	0.866629	0.59	0.402	1
Smarcc1	0.0213614	0.186874	0.41	0.215	1
Ly86	0.0214452	-1.419	0.59	0.626	1
Ppp1cb	0.02155	0.139396	0.538	0.289	1
Fam102b	0.0215504	-1.77055	0.231	0.39	1
Prcc	0.0215657	1.24787	0.205	0.081	1
Rrp7a	0.0215696	0.926126	0.231	0.098	1
Pgap1	0.0216004	1.55478	0.154	0.053	1
Ppp6c	0.021628	0.688515	0.359	0.179	1
Nck1	0.0216799	-1.99632	0.154	0.313	1
Calr	0.0216884	0.52028	0.769	0.61	1
Adss	0.0217127	0.457844	0.308	0.146	1
Stxbp2	0.021722	1.26798	0.308	0.154	1
Phactr3	0.0217432	-3.77781	0	0.122	1
Gabrd	0.0217432	-3.92812	0	0.122	1
Bzw2	0.021808	0.144997	0.385	0.195	1
Snrpe	0.0219296	0.43523	0.692	0.52	1
Gtpbp8	0.0219485	0.346425	0.179	0.065	1
Rspry1	0.0219552	0.90455	0.282	0.126	1
Senp3	0.0219552	0.89153	0.282	0.126	1
Rps8	0.0219553	0.339571	1	0.939	1
Dnajc13	0.0219956	0.488342	0.41	0.203	1
Nckap1l	0.021998	-1.68832	0.333	0.467	1
Prpf8	0.0220071	0.314388	0.487	0.252	1
Lekr1	0.0220682	3.19638	0.077	0.016	1
Nutf2-ps1	0.0220682	3.32867	0.077	0.016	1
Ngdn	0.0221121	0.995846	0.256	0.114	1
Pycard	0.0221502	0.435135	0.744	0.508	1
Cndp2	0.0221697	0.602354	0.513	0.301	1
Rnf40	0.0222057	0.843447	0.179	0.065	1
Knstrn	0.0222669	0.506722	0.205	0.081	1
Umps	0.0222669	0.728678	0.205	0.081	1
Kcnk12	0.0222947	-1.83502	0.026	0.171	1
Mfsd1	0.0223003	1.29452	0.385	0.224	1
Hspbp1	0.0224032	0.305732	0.231	0.093	1
Snx2	0.0224794	0.434352	0.564	0.341	1
Rtf2	0.0225108	0.625211	0.487	0.276	1
Suv39h2	0.0225253	1.44143	0.077	0.016	1
Chic1	0.0225253	2.7134	0.077	0.016	1
Zbtb4	0.0225603	-3.21242	0.051	0.191	1
Xpo1	0.0226016	0.568523	0.436	0.24	1
Haus8	0.0226078	0.869079	0.205	0.085	1
Naa15	0.0226677	0.271979	0.487	0.26	1
Itgb3bp	0.0227281	0.291216	0.179	0.065	1
Cdc20	0.0227281	0.278807	0.179	0.065	1
Zbed4	0.0227281	2.1098	0.128	0.041	1
Fxr1	0.0228158	0.738082	0.487	0.276	1
Rnh1	0.0229098	0.508259	0.59	0.337	1
Chp1	0.0229115	0.327617	0.308	0.142	1
Clpp	0.0229555	0.574373	0.359	0.183	1
Smarca4	0.0229696	0.358603	0.487	0.276	1
Cuta	0.0229835	0.57611	0.615	0.37	1
Tmem82	0.0229905	2.19456	0.077	0.016	1
Ctdspl	0.0229905	2.54144	0.077	0.016	1
Phb	0.0229981	0.699497	0.385	0.207	1
Tjp1	0.0230444	-2.38938	0.077	0.228	1
Nasp	0.0230956	0.811878	0.436	0.26	1
Pold3	0.0231158	0.43437	0.231	0.098	1
Cd24a	0.0231629	0.241904	0.256	0.114	1
Strn	0.0231982	0.10338	0.256	0.11	1
Atox1	0.0232117	0.445724	0.769	0.541	1
Psme2	0.0232125	0.43239	0.564	0.346	1
Cab39l	0.0232326	1.45359	0.205	0.081	1
Bzw1	0.0233508	0.451535	0.667	0.467	1
Gtf2h5	0.0233545	0.715046	0.538	0.333	1
Dlst	0.0234539	0.295376	0.487	0.26	1
Nectin1	0.0234641	2.40555	0.077	0.016	1
Kctd9	0.0234641	2.01795	0.077	0.016	1
Dpysl3	0.0234641	2.27472	0.077	0.016	1
Med15	0.0234998	0.649038	0.333	0.159	1
Zbtb43	0.0235316	0.280207	0.179	0.065	1
BC029722	0.0235316	0.143302	0.179	0.065	1
Rpp30	0.0235708	1.16078	0.205	0.085	1
Adamts1	0.0235773	-2.98105	0.128	0.28	1
Bmpr1a	0.0236069	0.681866	0.154	0.053	1
Rpp21	0.0236908	0.697002	0.41	0.207	1
Tnrc6a	0.0237744	-0.831353	0.256	0.435	1
Mtpn	0.0237763	0.485745	0.564	0.366	1
Slc25a11	0.0238134	0.639878	0.487	0.301	1
Hmgn1	0.0238417	0.608677	0.692	0.5	1
Zwint	0.023858	0.288561	0.359	0.183	1
Timm50	0.023934	0.378038	0.359	0.179	1
Zfp626	0.0239461	1.71717	0.077	0.016	1
Smim24	0.0239461	1.70761	0.077	0.016	1
Hus1	0.0239461	1.58438	0.077	0.016	1
Vdac2	0.0240471	0.373986	0.846	0.695	1
Pi4k2b	0.0240483	1.87652	0.128	0.041	1
Dbnl	0.0240883	0.625873	0.615	0.354	1
Slco2b1	0.0240924	-1.61982	0.333	0.443	1
Tm2d1	0.0241213	0.364455	0.385	0.187	1
Mpnd	0.0241281	0.50388	0.282	0.13	1
St8sia4	0.024135	-1.871	0.077	0.232	1
Zfas1	0.0241482	0.411522	0.41	0.22	1
Tex2	0.0242092	0.844865	0.154	0.053	1
Fis1	0.0242239	0.422594	0.718	0.533	1
Tysnd1	0.0242345	0.573328	0.205	0.081	1
Nudt14	0.0242345	0.49685	0.205	0.081	1
Ehmt1	0.0242426	0.190306	0.436	0.228	1
Mycbp2	0.0242782	-1.04992	0.564	0.614	1
Whrn	0.0243162	-3.80062	0	0.118	1
Mxd1	0.0243162	-4.44303	0	0.118	1
5430427O19Rik	0.0243162	-3.46023	0	0.118	1
Mdc1	0.02436	1.86113	0.179	0.069	1
C130013H08Rik	0.0244367	2.21794	0.077	0.016	1
Nkain1	0.0244367	1.58481	0.077	0.016	1
Hgf	0.0244367	3.35623	0.077	0.016	1
Slc25a13	0.0244367	1.74645	0.077	0.016	1
Eif3k	0.0244738	0.470179	0.718	0.467	1
AU041133	0.0244758	2.51397	0.103	0.028	1
Ttll1	0.0244758	2.22401	0.103	0.028	1
Kpnb1	0.0244761	0.101126	0.513	0.272	1
Ccl24	0.0244908	0.117805	0.205	0.081	1
Rara	0.0244908	0.331721	0.205	0.081	1
Slc35a4	0.0245335	0.213405	0.256	0.11	1
Chpt1	0.0246369	0.311771	0.282	0.126	1
Smim7	0.0246667	0.618827	0.462	0.26	1
Pld4	0.0248186	-1.19057	0.513	0.573	1
Ctsz	0.0248394	0.684791	0.846	0.703	1
Sorbs2	0.0248768	2.61896	0.103	0.028	1
Ccne2	0.0249359	1.35678	0.077	0.016	1
Epha2	0.0249359	1.91016	0.077	0.016	1
Ccpg1os	0.0249359	1.06131	0.077	0.016	1
[truncated: 7,871 more rows]
