# Supplementary material for: PTEN restrains SHH medulloblastoma growth through cell autonomous and nonautonomous mechanisms
Source: eLife. 2026 Apr 17;14:RP108190. doi: 10.7554/eLife.108190 (PMC13090030; doi:10.7554/eLife.108190)
Supplement: Figure 9—figure supplement 1—source data 5. — Related to Figure 9—figure supplement 1D. [file elife-108190-fig9-figsupp1-data5.xlsx]

## Sheet: Figure 9-Supp 1-source data 5
Figure 9-Supplemental 1-source data 5. GSEA analysis of Gene Ontology terms of DEG gene list of macrophages in SmoM2; Ptenfl/fl compared with SmoM2 tumors. Related to Figure 9-Supplemental 1D.
GO terms	ID	Description	setSize	enrichmentScore	NES	pvalue	p.adjust	qvalue	rank	leading_edge	core_enrichment
GO:0000076	GO:0000076	DNA replication checkpoint signaling	12	0.789472	2.14024	7.08442e-05	0.0072637	0.00653501	1480	tags=75%, list=15%, signal=64%	18392/21853/23834/269582/15574/67177/66131/327762/235559
GO:0060445	GO:0060445	branching involved in salivary gland morphogenesis	13	0.761035	2.11497	6.99188e-05	0.0072637	0.00653501	1231	tags=62%, list=13%, signal=54%	15234/21926/12550/67784/18844/21817/57764/18590
GO:0010885	GO:0010885	regulation of cholesterol storage	10	0.759575	1.9283	0.00108516	0.0395062	0.035543	832	tags=50%, list=9%, signal=46%	22259/19016/12491/20288/16956
GO:1902969	GO:1902969	mitotic DNA replication	12	0.746539	2.02385	0.000525176	0.0269233	0.0242224	1069	tags=67%, list=11%, signal=59%	12544/17219/17215/17216/17217/18968/12190/19361
GO:0000727	GO:0000727	double-strand break repair via break-induced replication	11	0.733699	1.94569	0.00206749	0.0590261	0.0531047	881	tags=64%, list=9%, signal=58%	12544/17219/17215/17216/17218/17217/272551
GO:0000012	GO:0000012	single strand break repair	10	0.731586	1.85725	0.00275177	0.070177	0.063137	1972	tags=70%, list=21%, signal=56%	319583/72103/104884/11545/70099/93759/14211
GO:1900262	GO:1900262	regulation of DNA-directed DNA polymerase activity	10	0.722455	1.83407	0.00377092	0.0830926	0.0747569	2072	tags=80%, list=22%, signal=63%	214901/69263/272551/18538/106344/72151/18148/69270
GO:1900264	GO:1900264	positive regulation of DNA-directed DNA polymerase activity	10	0.722455	1.83407	0.00377092	0.0830926	0.0747569	2072	tags=80%, list=22%, signal=63%	214901/69263/272551/18538/106344/72151/18148/69270
GO:0006268	GO:0006268	DNA unwinding involved in DNA replication	17	0.716688	2.14242	0.000191676	0.0143728	0.012931	1069	tags=59%, list=11%, signal=52%	79456/12544/17219/17215/17216/17218/17217/12144/272551/19361
GO:0030174	GO:0030174	regulation of DNA-templated DNA replication initiation	11	0.70775	1.87687	0.00447814	0.0911218	0.0819806	795	tags=55%, list=8%, signal=50%	17219/17215/17216/17218/17217/67177
GO:0006271	GO:0006271	DNA strand elongation involved in DNA replication	13	0.698423	1.94097	0.00112077	0.0405089	0.0364451	2072	tags=77%, list=22%, signal=60%	18973/17215/17217/18538/18968/59001/327762/16881/17220/69270
GO:0007435	GO:0007435	salivary gland morphogenesis	18	0.689411	2.10386	0.000213804	0.015345	0.0138056	1231	tags=50%, list=13%, signal=44%	15234/21926/12550/67784/18844/13649/21817/57764/18590
GO:0010878	GO:0010878	cholesterol storage	12	0.679793	1.84291	0.00434517	0.089836	0.0808238	832	tags=42%, list=9%, signal=38%	22259/19016/12491/20288/16956
GO:0051782	GO:0051782	negative regulation of cell division	10	0.675198	1.7141	0.0119394	0.151474	0.136278	613	tags=40%, list=6%, signal=37%	52679/12316/108961/12144
GO:0051383	GO:0051383	kinetochore organization	20	0.673998	2.1272	0.000330345	0.0199958	0.0179899	2089	tags=80%, list=22%, signal=63%	208628/320394/60411/66311/72155/67177/66977/26886/69928/218977/70099/217449/67052/229841/14211/12615
GO:0006270	GO:0006270	DNA replication initiation	27	0.671026	2.29115	1.78186e-05	0.0029381	0.00264335	928	tags=52%, list=10%, signal=47%	18392/12447/12544/23834/17219/17215/17216/17218/19075/17217/70024/67177/12448/18968
GO:0010743	GO:0010743	regulation of macrophage derived foam cell differentiation	12	0.663889	1.79979	0.00718774	0.108845	0.097926	1778	tags=67%, list=18%, signal=54%	19016/12491/20288/16173/11307/16956/26420/16410
GO:2000104	GO:2000104	negative regulation of DNA-templated DNA replication	10	0.655714	1.66463	0.0155624	0.172516	0.15521	1100	tags=40%, list=11%, signal=35%	21853/226409/67177/66131
GO:0051382	GO:0051382	kinetochore assembly	15	0.654247	1.89284	0.00368111	0.0823069	0.07405	2608	tags=87%, list=27%, signal=63%	208628/320394/60411/66311/72155/26886/69928/218977/217449/229841/12615/20892/19822
GO:0006266	GO:0006266	DNA ligation	11	0.649139	1.72144	0.0206974	0.198064	0.178195	1933	tags=55%, list=20%, signal=44%	319583/72103/59047/19361/21973/75570
GO:0035584	GO:0035584	calcium-mediated signaling using intracellular calcium source	13	0.647387	1.79913	0.00615894	0.101119	0.0909752	587	tags=31%, list=6%, signal=29%	108071/23964/22329/26557
GO:0042953	GO:0042953	lipoprotein transport	11	0.647346	1.71669	0.0220012	0.205272	0.184679	1638	tags=55%, list=17%, signal=45%	19016/12491/20288/54135/11813/11810
GO:0044872	GO:0044872	lipoprotein localization	11	0.647346	1.71669	0.0220012	0.205272	0.184679	1638	tags=55%, list=17%, signal=45%	19016/12491/20288/54135/11813/11810
GO:0023019	GO:0023019	signal transduction involved in regulation of gene expression	10	0.646182	1.64044	0.019363	0.192407	0.173105	1219	tags=40%, list=13%, signal=35%	17075/18595/22030/11545
GO:0009130	GO:0009130	pyrimidine nucleoside monophosphate biosynthetic process	10	0.643449	1.6335	0.020356	0.196292	0.176601	2106	tags=70%, list=22%, signal=55%	22171/22245/18103/80914/18102/110074/22247
GO:0007431	GO:0007431	salivary gland development	19	0.641515	1.98262	0.00129639	0.0447071	0.0402222	1231	tags=47%, list=13%, signal=41%	15234/21926/12550/67784/18844/13649/21817/57764/18590
GO:0010226	GO:0010226	response to lithium ion	11	0.637682	1.69106	0.0275421	0.23533	0.211722	602	tags=36%, list=6%, signal=34%	11770/19016/12550/114663
GO:0060623	GO:0060623	regulation of chromosome condensation	11	0.637431	1.69039	0.0275421	0.23533	0.211722	3267	tags=91%, list=34%, signal=60%	215387/68298/70099/14211/54392/244329/93762/22385/268697/15078
GO:0009065	GO:0009065	glutamine family amino acid catabolic process	10	0.633785	1.60896	0.0236658	0.214229	0.192738	95	tags=20%, list=1%, signal=20%	11846/18125
GO:0070202	GO:0070202	regulation of establishment of protein localization to chromosome	11	0.630062	1.67085	0.0308015	0.2541	0.228609	2419	tags=73%, list=25%, signal=54%	224008/12462/21454/12466/216853/12461/12465/12468
GO:0034501	GO:0034501	protein localization to kinetochore	16	0.629771	1.84265	0.00314236	0.0769128	0.069197	2168	tags=62%, list=23%, signal=48%	208628/68014/70385/76464/67177/83815/217449/108911/67052/22137
GO:1903083	GO:1903083	protein localization to condensed chromosome	16	0.629771	1.84265	0.00314236	0.0769128	0.069197	2168	tags=62%, list=23%, signal=48%	208628/68014/70385/76464/67177/83815/217449/108911/67052/22137
GO:0010165	GO:0010165	response to X-ray	19	0.628875	1.94356	0.00206384	0.0590261	0.0531047	1918	tags=53%, list=20%, signal=42%	319583/14462/12144/22596/12190/16952/12444/17685/13870/85305
GO:0009129	GO:0009129	pyrimidine nucleoside monophosphate metabolic process	13	0.627075	1.74269	0.0104113	0.138743	0.124825	2106	tags=62%, list=22%, signal=48%	22171/22245/18103/80914/18102/50773/110074/22247
GO:0045005	GO:0045005	DNA-templated DNA replication maintenance of fidelity	43	0.626304	2.39432	8.49062e-07	0.00038779	0.000348887	1351	tags=49%, list=14%, signal=42%	72749/18973/268465/21853/226409/212377/12144/225182/18971/27354/18538/21681/71567/209334/12190/19361/66131/69928/12189/11545/327762
GO:0006525	GO:0006525	arginine metabolic process	10	0.626132	1.58954	0.0279686	0.236633	0.212894	95	tags=20%, list=1%, signal=20%	11846/18125
GO:0010954	GO:0010954	positive regulation of protein processing	16	0.625769	1.83094	0.00344163	0.0800497	0.0720192	2021	tags=50%, list=21%, signal=40%	268973/17387/227753/233744/20194/433182/21367/53600
GO:0007063	GO:0007063	regulation of sister chromatid cohesion	17	0.614802	1.83785	0.00808272	0.117994	0.106157	1948	tags=53%, list=20%, signal=42%	79456/14156/12235/12006/68549/68501/12387/67849/105377
GO:0071285	GO:0071285	cellular response to lithium ion	10	0.612714	1.55547	0.0369216	0.286256	0.257539	471	tags=30%, list=5%, signal=29%	11770/19016/12550
GO:1903319	GO:1903319	positive regulation of protein maturation	17	0.60314	1.80298	0.00988477	0.13314	0.119783	2021	tags=47%, list=21%, signal=37%	268973/17387/227753/233744/20194/433182/21367/53600
GO:0010742	GO:0010742	macrophage derived foam cell differentiation	15	0.599048	1.73314	0.0196404	0.193098	0.173727	1778	tags=53%, list=18%, signal=44%	19016/12491/20288/16173/11307/16956/26420/16410
GO:0090329	GO:0090329	regulation of DNA-templated DNA replication	43	0.598836	2.28931	5.63309e-06	0.00129086	0.00116137	1224	tags=44%, list=13%, signal=39%	52679/21853/108961/17219/17215/17216/17218/226409/214901/13804/17217/12144/69263/67177/272551/18538/66131/106344/72151
GO:0070203	GO:0070203	regulation of establishment of protein localization to telomere	10	0.598805	1.52016	0.0553097	0.360878	0.324675	2419	tags=70%, list=25%, signal=52%	12462/21454/12466/216853/12461/12465/12468
GO:0040036	GO:0040036	regulation of fibroblast growth factor receptor signaling pathway	17	0.597241	1.78535	0.0114319	0.148026	0.133176	840	tags=41%, list=9%, signal=38%	26427/101540/14462/12393/80752/72043/116701
GO:0001709	GO:0001709	cell fate determination	13	0.596413	1.65747	0.0212549	0.200346	0.180248	445	tags=31%, list=5%, signal=29%	13592/17927/19207/14462
GO:0033260	GO:0033260	nuclear DNA replication	24	0.59584	1.95385	0.000637574	0.029659	0.0266837	2210	tags=62%, list=23%, signal=48%	12544/17219/17215/17216/17217/67177/18538/18968/12190/19361/327762/16881/12545/69270/67444
GO:0044786	GO:0044786	cell cycle DNA replication	29	0.594597	2.07525	0.000312774	0.0191631	0.0172407	2210	tags=59%, list=23%, signal=45%	52679/12544/108961/17219/17215/17216/17217/67177/18538/18968/12190/19361/327762/16881/12545/69270/67444
GO:0006958	GO:0006958	complement activation, classical pathway	10	0.592293	1.50363	0.0597345	0.368978	0.331962	879	tags=40%, list=9%, signal=36%	13136/96935/232371/12266
GO:0034508	GO:0034508	centromere complex assembly	28	0.591329	2.02166	0.00073047	0.0308393	0.0277456	2089	tags=57%, list=22%, signal=45%	208628/102920/15201/320394/60411/66311/66578/72155/26886/69928/218977/66336/217449/50927/229841/12615
GO:0032508	GO:0032508	DNA duplex unwinding	34	0.591004	2.13	8.86053e-05	0.00839911	0.00755653	2072	tags=59%, list=22%, signal=46%	79456/12544/17219/17215/17216/17218/17217/12144/27354/272551/320209/71567/19361/16952/226153/21973/19360/117599/17220/69270
GO:0071459	GO:0071459	protein localization to chromosome, centromeric region	21	0.590218	1.87361	0.00337891	0.0791369	0.071198	2168	tags=57%, list=23%, signal=44%	208628/68014/70385/12236/76464/67177/83815/217449/108911/67052/12615/22137
GO:0030104	GO:0030104	water homeostasis	10	0.589042	1.49538	0.0597345	0.368978	0.331962	809	tags=40%, list=8%, signal=37%	22393/16000/11512/11677
GO:0051290	GO:0051290	protein heterotetramerization	12	0.588594	1.59567	0.0431917	0.318175	0.286256	1979	tags=58%, list=21%, signal=46%	14812/16661/20135/234309/23874/20133/66590
GO:2000105	GO:2000105	positive regulation of DNA-templated DNA replication	12	0.588503	1.59542	0.0431917	0.318175	0.286256	795	tags=33%, list=8%, signal=31%	52679/108961/13804/67177
GO:0051231	GO:0051231	spindle elongation	12	0.588461	1.59531	0.0431917	0.318175	0.286256	2407	tags=58%, list=25%, signal=44%	74393/16571/26934/11799/233406/16319/71819
GO:0032392	GO:0032392	DNA geometric change	39	0.587272	2.19602	3.20075e-05	0.00423172	0.0038072	2072	tags=59%, list=22%, signal=46%	79456/12544/17219/17215/17216/17218/226409/17217/12144/27354/272551/320209/71567/19361/16952/107885/545725/226153/21973/19360/117599/17220/69270
GO:0000212	GO:0000212	meiotic spindle organization	14	0.583078	1.65455	0.0233348	0.212227	0.190937	1928	tags=50%, list=20%, signal=40%	12316/103733/105988/68767/67052/229841/223593
GO:0016446	GO:0016446	somatic hypermutation of immunoglobulin genes	11	0.578739	1.53475	0.0691261	0.396793	0.356987	1680	tags=45%, list=17%, signal=38%	77782/17688/26909/22256/17685
GO:0090077	GO:0090077	foam cell differentiation	16	0.577567	1.6899	0.0125212	0.154942	0.139398	1778	tags=50%, list=18%, signal=41%	19016/12491/20288/16173/11307/16956/26420/16410
GO:0031297	GO:0031297	replication fork processing	36	0.574917	2.10604	0.00013513	0.0115797	0.010418	1351	tags=44%, list=14%, signal=38%	72749/268465/226409/212377/12144/225182/27354/18538/21681/209334/12190/19361/69928/12189/11545/327762
GO:0090201	GO:0090201	negative regulation of release of cytochrome c from mitochondria	15	0.571507	1.65346	0.0319367	0.260004	0.23392	1851	tags=60%, list=19%, signal=49%	15234/16000/53380/12018/14297/66494/69076/16905/381038
GO:0003180	GO:0003180	aortic valve morphogenesis	14	0.568401	1.6129	0.0292926	0.245686	0.221039	1058	tags=36%, list=11%, signal=32%	19876/13717/14462/12006/268902
GO:1901836	GO:1901836	regulation of transcription of nucleolar large rRNA by RNA polymerase I	11	0.564733	1.49761	0.0588235	0.367337	0.330486	4190	tags=100%, list=44%, signal=56%	103136/75678/68845/21945/56717/20586/20587/17975/209011/68979/68077
GO:0035825	GO:0035825	homologous recombination	30	0.564225	1.9908	0.000498254	0.0258065	0.0232176	1769	tags=57%, list=18%, signal=46%	268465/623474/211651/19362/76915/237911/214901/225182/27354/19361/28135/69928/12189/235559/21973/19360/19183
GO:0140241	GO:0140241	translation at synapse	42	0.562914	2.14271	1.92988e-05	0.0029381	0.00264335	3419	tags=81%, list=36%, signal=52%	269261/66480/19896/19951/20042/20103/67891/319195/67115/19943/65019/20055/19944/19989/20044/22121/78294/26961/13629/27207/110954/68193/67097/27176/268449/26451/19942/270106/20005/27370/20088/267019/19988/19934
GO:0140242	GO:0140242	translation at postsynapse	42	0.562914	2.14271	1.92988e-05	0.0029381	0.00264335	3419	tags=81%, list=36%, signal=52%	269261/66480/19896/19951/20042/20103/67891/319195/67115/19943/65019/20055/19944/19989/20044/22121/78294/26961/13629/27207/110954/68193/67097/27176/268449/26451/19942/270106/20005/27370/20088/267019/19988/19934
GO:0072710	GO:0072710	response to hydroxyurea	10	0.562656	1.42839	0.0840708	0.425778	0.383065	1069	tags=40%, list=11%, signal=36%	21853/224008/12144/19361
GO:0033599	GO:0033599	regulation of mammary gland epithelial cell proliferation	15	0.562637	1.62779	0.0367287	0.285642	0.256987	1464	tags=40%, list=15%, signal=34%	404710/19876/12578/14462/12190/12028
GO:0140236	GO:0140236	translation at presynapse	41	0.5606	2.11691	7.6671e-05	0.00755285	0.00679516	3419	tags=80%, list=36%, signal=52%	269261/66480/19896/19951/20042/20103/67891/319195/67115/19943/65019/20055/19944/19989/20044/22121/78294/26961/27207/110954/68193/67097/27176/268449/26451/19942/270106/20005/27370/20088/267019/19988/19934
GO:0006261	GO:0006261	DNA-templated DNA replication	117	0.558961	2.58768	1e-10	2.512e-07	2.26e-07	1862	tags=49%, list=19%, signal=40%	72749/52679/79456/18973/268465/18392/12447/12544/21853/23834/108961/17219/17215/17216/77782/17218/226409/214901/19075/13804/212377/17217/12144/69263/70024/225182/18971/27354/67177/12448/272551/218973/18538/18968/21681/71567/209334/59001/12190/19361/66131/69928/12189/106344/11545/72151/327762/235559/18148/226153/16881/20133/19360/66979/12566/12545/117599
GO:0055090	GO:0055090	acylglycerol homeostasis	18	0.558876	1.70551	0.0146003	0.167088	0.150326	832	tags=28%, list=9%, signal=25%	22259/57875/11425/16173/16956
GO:0070328	GO:0070328	triglyceride homeostasis	18	0.558876	1.70551	0.0146003	0.167088	0.150326	832	tags=28%, list=9%, signal=25%	22259/57875/11425/16173/16956
GO:0030858	GO:0030858	positive regulation of epithelial cell differentiation	20	0.558052	1.76126	0.0141429	0.165241	0.148664	54	tags=15%, list=1%, signal=15%	19126/22337/19207
GO:1902001	GO:1902001	fatty acid transmembrane transport	12	0.556132	1.50766	0.0669303	0.390369	0.351208	2279	tags=67%, list=24%, signal=51%	12491/26457/14081/384783/19300/11652/433256/11666
GO:0033273	GO:0033273	response to vitamin	20	0.556075	1.75503	0.0148045	0.168657	0.151738	1286	tags=35%, list=13%, signal=30%	22337/70789/20750/11486/12393/20181/78797
GO:0051450	GO:0051450	myoblast proliferation	10	0.555008	1.40898	0.0929204	0.438576	0.394579	365	tags=30%, list=4%, signal=29%	17927/15234/16000
GO:2000671	GO:2000671	regulation of motor neuron apoptotic process	12	0.554596	1.5035	0.0695809	0.396793	0.356987	1998	tags=50%, list=21%, signal=40%	19400/26404/12028/12017/26398/26400
GO:0007131	GO:0007131	reciprocal meiotic recombination	25	0.554191	1.8558	0.00476406	0.0926885	0.0833901	1769	tags=52%, list=18%, signal=43%	268465/623474/211651/19362/76915/237911/214901/19361/28135/69928/235559/21973/19183
GO:0140527	GO:0140527	reciprocal homologous recombination	25	0.554191	1.8558	0.00476406	0.0926885	0.0833901	1769	tags=52%, list=18%, signal=43%	268465/623474/211651/19362/76915/237911/214901/19361/28135/69928/235559/21973/19183
GO:0007220	GO:0007220	Notch receptor processing	10	0.553942	1.40627	0.0929204	0.438576	0.394579	306	tags=20%, list=3%, signal=19%	208117/227325
GO:1902254	GO:1902254	negative regulation of intrinsic apoptotic signaling pathway by p53 class mediator	14	0.553561	1.57079	0.038252	0.293653	0.264195	1945	tags=50%, list=20%, signal=40%	106298/75736/28135/67211/12505/69076/93759
GO:1901386	GO:1901386	negative regulation of voltage-gated calcium channel activity	12	0.552539	1.49792	0.0735568	0.404391	0.363823	208	tags=17%, list=2%, signal=16%	54652/12297
GO:0009226	GO:0009226	nucleotide-sugar biosynthetic process	14	0.550503	1.56212	0.040913	0.306786	0.27601	1457	tags=36%, list=15%, signal=30%	29858/234730/54342/107652/227620
GO:0035272	GO:0035272	exocrine system development	26	0.548317	1.86422	0.0048687	0.0926885	0.0833901	1231	tags=42%, list=13%, signal=37%	15234/109901/16000/21926/12550/67784/18844/13649/21817/57764/18590
GO:0000491	GO:0000491	small nucleolar ribonucleoprotein complex assembly	10	0.54475	1.38294	0.115044	0.483598	0.435085	1924	tags=50%, list=20%, signal=40%	72614/72171/234344/20174/68845
GO:0019363	GO:0019363	pyridine nucleotide biosynthetic process	10	0.5445	1.3823	0.117257	0.485653	0.436933	986	tags=30%, list=10%, signal=27%	70789/74080/225994
GO:0036151	GO:0036151	phosphatidylcholine acyl-chain remodeling	10	0.543843	1.38063	0.117257	0.485653	0.436933	436	tags=20%, list=5%, signal=19%	22259/67216
GO:0060688	GO:0060688	regulation of morphogenesis of a branching structure	32	0.540709	1.91484	0.00139329	0.0469603	0.0422494	1727	tags=41%, list=18%, signal=33%	18654/15234/71751/21926/18595/12550/11835/66725/57764/20181/18590/17242/12387
GO:0006805	GO:0006805	xenobiotic metabolic process	23	0.539632	1.7444	0.0110058	0.144747	0.130226	2252	tags=52%, list=23%, signal=40%	225884/18125/27384/14862/57344/11622/14081/235674/67768/11632/14923/14873
GO:0071103	GO:0071103	DNA conformation change	46	0.537178	2.0727	0.000104601	0.00973181	0.00875553	2072	tags=52%, list=22%, signal=41%	79456/12544/17219/17215/17216/17218/226409/17217/12144/27354/272551/320209/71567/19361/16952/72960/107885/545725/226153/21973/19360/117599/17220/69270
GO:0051984	GO:0051984	positive regulation of chromosome segregation	27	0.53475	1.82585	0.0063405	0.101448	0.0912708	2059	tags=56%, list=21%, signal=44%	58186/23834/215387/52683/17120/67177/68298/11799/70099/76044/108911/229841/14211/54392/16319
GO:0031954	GO:0031954	positive regulation of protein autophosphorylation	18	0.533169	1.62706	0.0259523	0.22728	0.20448	1747	tags=50%, list=18%, signal=41%	93695/11421/54635/27354/74012/29875/18590/71943/19360
GO:0030194	GO:0030194	positive regulation of blood coagulation	11	0.53255	1.41226	0.104575	0.463712	0.417193	681	tags=36%, list=7%, signal=34%	18816/12491/14062/20443
GO:1900048	GO:1900048	positive regulation of hemostasis	11	0.53255	1.41226	0.104575	0.463712	0.417193	681	tags=36%, list=7%, signal=34%	18816/12491/14062/20443
GO:0030730	GO:0030730	sequestering of triglyceride	13	0.532052	1.47861	0.0704846	0.399227	0.359177	832	tags=38%, list=9%, signal=35%	19016/11425/11520/21926/16956
GO:0010875	GO:0010875	positive regulation of cholesterol efflux	15	0.530698	1.53539	0.0593607	0.368978	0.331962	767	tags=27%, list=8%, signal=25%	22259/19016/67484/11307
GO:0001522	GO:0001522	pseudouridine synthesis	13	0.530573	1.4745	0.0726872	0.403069	0.362634	1537	tags=46%, list=16%, signal=39%	78895/74467/78697/234344/52530/71989
GO:0009219	GO:0009219	pyrimidine deoxyribonucleotide metabolic process	11	0.527393	1.39859	0.117647	0.486468	0.437666	1903	tags=55%, list=20%, signal=44%	22171/18103/21915/18102/50773/110074
GO:2000042	GO:2000042	negative regulation of double-strand break repair via homologous recombination	12	0.525476	1.42456	0.0899123	0.433512	0.390023	1862	tags=50%, list=19%, signal=40%	223970/75317/77782/94232/27223/117599
GO:0000729	GO:0000729	DNA double-strand break processing	14	0.523259	1.48481	0.0663717	0.388185	0.349243	2336	tags=64%, list=24%, signal=49%	237911/12144/225182/27354/327762/19360/117599/56515/93765
GO:1901741	GO:1901741	positive regulation of myoblast fusion	11	0.522709	1.38616	0.122004	0.49225	0.442868	67	tags=18%, list=1%, signal=18%	17927/23886
GO:0002328	GO:0002328	pro-B cell differentiation	11	0.5223	1.38508	0.124183	0.495942	0.44619	31	tags=9%, list=0%, signal=9%	319583
GO:0010224	GO:0010224	response to UV-B	13	0.521744	1.44996	0.0859031	0.428886	0.38586	859	tags=31%, list=9%, signal=28%	12575/76293/65964/15587
GO:0070192	GO:0070192	chromosome organization involved in meiotic cell cycle	36	0.520627	1.90716	0.00127093	0.0447071	0.0402222	1769	tags=53%, list=18%, signal=43%	71846/12447/211651/76915/217716/237911/12235/12236/215387/52683/12448/68549/68298/19361/28135/77053/70099/19360/19183
GO:0016486	GO:0016486	peptide hormone processing	12	0.520546	1.41119	0.0942982	0.441857	0.397531	131	tags=17%, list=1%, signal=16%	18548/11421
GO:0060512	GO:0060512	prostate gland morphogenesis	13	0.519714	1.44432	0.0881057	0.431778	0.388462	1271	tags=38%, list=13%, signal=33%	16000/11835/17390/20181/12505
GO:0060740	GO:0060740	prostate gland epithelium morphogenesis	13	0.519714	1.44432	0.0881057	0.431778	0.388462	1271	tags=38%, list=13%, signal=33%	16000/11835/17390/20181/12505
GO:0033194	GO:0033194	response to hydroperoxide	14	0.517879	1.46954	0.0818584	0.420768	0.378557	253	tags=21%, list=3%, signal=21%	74041/12491/56615
GO:0032373	GO:0032373	positive regulation of sterol transport	20	0.517369	1.63287	0.0397584	0.30037	0.270238	2339	tags=50%, list=24%, signal=38%	22259/19016/67484/11307/68767/11303/12306/93759/27403/11816
GO:0032376	GO:0032376	positive regulation of cholesterol transport	20	0.517369	1.63287	0.0397584	0.30037	0.270238	2339	tags=50%, list=24%, signal=38%	22259/19016/67484/11307/68767/11303/12306/93759/27403/11816
GO:0007140	GO:0007140	male meiotic nuclear division	21	0.51602	1.63807	0.025389	0.225361	0.202753	1486	tags=48%, list=15%, signal=40%	14087/17864/217716/214901/64707/68549/12190/19361/228421/15512
GO:0021854	GO:0021854	hypothalamus development	12	0.515819	1.39838	0.0964912	0.445972	0.401233	1727	tags=50%, list=18%, signal=41%	20349/18844/18187/12028/22272/12387
GO:0051784	GO:0051784	negative regulation of nuclear division	45	0.515168	1.97484	0.000268283	0.0176342	0.0158652	2168	tags=44%, list=23%, signal=35%	208628/20112/68014/70385/12649/12235/12236/17120/67177/209334/66977/11799/18817/71943/67052/229841/54369/16319/18413/22137
GO:0032511	GO:0032511	late endosome to vacuole transport via multivesicular body sorting pathway	15	0.514619	1.48887	0.0707763	0.400428	0.360258	1095	tags=33%, list=11%, signal=30%	28084/20844/105513/66201/104831
GO:0070200	GO:0070200	establishment of protein localization to telomere	16	0.513153	1.50143	0.0649652	0.384435	0.345869	2736	tags=62%, list=28%, signal=45%	12190/12462/69917/21454/12466/216853/12461/12465/12468/622675
GO:0002903	GO:0002903	negative regulation of B cell apoptotic process	12	0.512201	1.38857	0.107456	0.469277	0.4222	1960	tags=42%, list=20%, signal=33%	209488/11486/12505/384783/57741
GO:0002455	GO:0002455	humoral immune response mediated by circulating immunoglobulin	17	0.51068	1.52659	0.077464	0.410889	0.369669	879	tags=35%, list=9%, signal=32%	13136/96935/21926/232371/26909/12266
GO:0071174	GO:0071174	mitotic spindle checkpoint signaling	37	0.508895	1.88071	0.00285635	0.0724762	0.0652055	2168	tags=43%, list=23%, signal=34%	208628/68014/70385/20460/12235/12236/17120/67177/209334/66977/11799/18817/67052/229841/16319/22137
GO:0060603	GO:0060603	mammary gland duct morphogenesis	20	0.508831	1.60592	0.045104	0.324665	0.292095	519	tags=20%, list=5%, signal=19%	22337/19876/13836/11835
GO:0009220	GO:0009220	pyrimidine ribonucleotide biosynthetic process	12	0.508782	1.3793	0.114035	0.480829	0.432593	2106	tags=58%, list=22%, signal=46%	22245/18103/80914/18102/51797/54369/22247
GO:0007129	GO:0007129	homologous chromosome pairing at meiosis	19	0.508755	1.57232	0.0425189	0.315532	0.283878	379	tags=32%, list=4%, signal=30%	71846/12447/211651/76915/217716/237911
GO:1905709	GO:1905709	negative regulation of membrane permeability	13	0.508726	1.41378	0.0991189	0.450766	0.405546	1963	tags=54%, list=20%, signal=43%	12018/75712/77446/100310872/74919/52538/11740
GO:0033598	GO:0033598	mammary gland epithelial cell proliferation	21	0.508186	1.6132	0.0332271	0.267521	0.240683	448	tags=24%, list=5%, signal=23%	404710/19876/12578/14462/13836
GO:0006298	GO:0006298	mismatch repair	18	0.507802	1.54965	0.0446608	0.324202	0.291679	1680	tags=56%, list=17%, signal=46%	217716/17688/67153/12006/26909/18538/71567/69724/68240/17685
GO:0046112	GO:0046112	nucleobase biosynthetic process	13	0.506943	1.40883	0.0991189	0.450766	0.405546	2987	tags=62%, list=31%, signal=42%	11486/108037/11821/51797/22247/67054/56717/66588
GO:0060444	GO:0060444	branching involved in mammary gland duct morphogenesis	16	0.506631	1.48235	0.0672854	0.391252	0.352002	519	tags=19%, list=5%, signal=18%	22337/13836/11835
GO:0023035	GO:0023035	CD40 signaling pathway	13	0.505538	1.40493	0.101322	0.454094	0.40854	2215	tags=38%, list=23%, signal=30%	14087/211651/21939/18673/21929
GO:1901739	GO:1901739	regulation of myoblast fusion	13	0.502251	1.39579	0.101322	0.454094	0.40854	67	tags=15%, list=1%, signal=15%	17927/23886
GO:0002089	GO:0002089	lens morphogenesis in camera-type eye	16	0.498722	1.45921	0.0719258	0.402423	0.362052	448	tags=19%, list=5%, signal=18%	58998/58235/13836
GO:0006312	GO:0006312	mitotic recombination	19	0.498514	1.54067	0.0534035	0.355835	0.320138	1818	tags=47%, list=19%, signal=38%	12144/209334/12190/19361/68501/13871/17685/19360/13870
GO:0010883	GO:0010883	regulation of lipid storage	33	0.498378	1.7838	0.00397309	0.0856688	0.0770746	879	tags=30%, list=9%, signal=28%	22259/17294/19016/11425/11520/12491/20288/11307/16956/12266
GO:0045682	GO:0045682	regulation of epidermis development	24	0.49759	1.63167	0.0134493	0.161064	0.144906	638	tags=21%, list=7%, signal=19%	22337/19207/16661/18109/17133
GO:0032371	GO:0032371	regulation of sterol transport	30	0.494529	1.74489	0.00753474	0.112662	0.10136	2339	tags=47%, list=24%, signal=35%	22259/19016/11812/99031/67484/52014/11307/11813/68767/11303/12306/93759/27403/11816
GO:0032374	GO:0032374	regulation of cholesterol transport	30	0.494529	1.74489	0.00753474	0.112662	0.10136	2339	tags=47%, list=24%, signal=35%	22259/19016/11812/99031/67484/52014/11307/11813/68767/11303/12306/93759/27403/11816
GO:0040020	GO:0040020	regulation of meiotic nuclear division	14	0.494109	1.40209	0.110619	0.472981	0.425532	237	tags=14%, list=2%, signal=14%	20112/19362
GO:0036297	GO:0036297	interstrand cross-link repair	22	0.492883	1.57876	0.0380925	0.293073	0.263672	1818	tags=36%, list=19%, signal=30%	14087/211651/19362/71567/73172/19361/140917/13870
GO:0010884	GO:0010884	positive regulation of lipid storage	16	0.492622	1.44136	0.0742459	0.406774	0.365967	879	tags=38%, list=9%, signal=34%	11425/11520/12491/20288/16956/12266
GO:0006956	GO:0006956	complement activation	16	0.492408	1.44074	0.0742459	0.406774	0.365967	879	tags=31%, list=9%, signal=28%	14962/13136/96935/232371/12266
GO:0003176	GO:0003176	aortic valve development	18	0.491082	1.49862	0.0612245	0.374846	0.337242	1058	tags=28%, list=11%, signal=25%	19876/13717/14462/12006/268902
GO:1905330	GO:1905330	regulation of morphogenesis of an epithelium	28	0.491042	1.6788	0.019132	0.192238	0.172953	1727	tags=39%, list=18%, signal=32%	15234/21926/14462/18595/12550/11835/57764/20181/18590/17242/12387
GO:2000114	GO:2000114	regulation of establishment of cell polarity	17	0.490815	1.46721	0.0715935	0.401884	0.361567	1803	tags=41%, list=19%, signal=34%	14462/227753/263406/240641/71653/12631/11352
GO:0002719	GO:0002719	negative regulation of cytokine production involved in immune response	16	0.490359	1.43474	0.0742459	0.406774	0.365967	425	tags=25%, list=4%, signal=24%	11846/69550/26362/21926
GO:0045604	GO:0045604	regulation of epidermal cell differentiation	20	0.490241	1.54725	0.0658181	0.388024	0.349098	638	tags=20%, list=7%, signal=19%	22337/19207/18109/17133
GO:0007094	GO:0007094	mitotic spindle assembly checkpoint signaling	36	0.490203	1.79571	0.00443198	0.0908827	0.0817655	2168	tags=42%, list=23%, signal=32%	208628/68014/70385/12235/12236/17120/67177/209334/66977/11799/18817/67052/229841/16319/22137
GO:0071173	GO:0071173	spindle assembly checkpoint signaling	36	0.490203	1.79571	0.00443198	0.0908827	0.0817655	2168	tags=42%, list=23%, signal=32%	208628/68014/70385/12235/12236/17120/67177/209334/66977/11799/18817/67052/229841/16319/22137
GO:0042790	GO:0042790	nucleolar large rRNA transcription by RNA polymerase I	19	0.489646	1.51327	0.0663291	0.388185	0.349243	3773	tags=68%, list=39%, signal=42%	103136/13871/64424/75678/68845/21453/66467/21945/56717/20586/20587/17975/209011
GO:0045839	GO:0045839	negative regulation of mitotic nuclear division	42	0.488624	1.85993	0.000894511	0.0340456	0.0306302	2168	tags=43%, list=23%, signal=33%	208628/68014/70385/12649/12235/12236/17120/67177/209334/66977/11799/18817/71943/67052/229841/54369/16319/22137
GO:0007099	GO:0007099	centriole replication	30	0.487877	1.72142	0.00949709	0.131241	0.118075	1543	tags=43%, list=16%, signal=36%	20460/233064/216846/68729/277939/17245/381644/14534/28135/68953/20873/18148/69871
GO:0033574	GO:0033574	response to testosterone	13	0.487648	1.35521	0.11674	0.485653	0.436933	519	tags=23%, list=5%, signal=22%	20750/12287/11835
GO:0015909	GO:0015909	long-chain fatty acid transport	31	0.486941	1.72335	0.0112341	0.146217	0.131549	2339	tags=48%, list=24%, signal=37%	11770/11421/19016/11520/12491/68039/26457/16952/14081/384783/19300/11652/433256/11666/11816
GO:0060706	GO:0060706	cell differentiation involved in embryonic placenta development	13	0.486786	1.35281	0.118943	0.487503	0.438598	1778	tags=46%, list=18%, signal=38%	52679/108961/20733/20873/14367/16410
GO:0051298	GO:0051298	centrosome duplication	52	0.486078	1.93632	0.000400045	0.021846	0.0196544	2087	tags=48%, list=22%, signal=38%	100502766/20460/233064/216846/98956/68729/277939/12449/17245/209334/381644/14534/12190/28135/68953/12189/20873/18148/69871/12566/67052/93759/219103/26425/234852
GO:0045662	GO:0045662	negative regulation of myoblast differentiation	15	0.485605	1.40493	0.105023	0.464876	0.418241	683	tags=27%, list=7%, signal=25%	57266/21926/171170/16173
GO:1905820	GO:1905820	positive regulation of chromosome separation	25	0.483853	1.62026	0.0316284	0.258687	0.232736	2059	tags=52%, list=21%, signal=41%	215387/52683/17120/67177/68298/11799/68501/70099/76044/229841/14211/54392/16319
GO:0098534	GO:0098534	centriole assembly	31	0.483611	1.71157	0.0120916	0.152858	0.137524	1543	tags=42%, list=16%, signal=35%	20460/233064/216846/68729/277939/17245/381644/14534/28135/68953/20873/18148/69871
GO:0016540	GO:0016540	protein autoprocessing	15	0.483392	1.39853	0.109589	0.471787	0.424458	1219	tags=27%, list=13%, signal=23%	18548/14297/12363/11545
GO:0000028	GO:0000028	ribosomal small subunit assembly	18	0.483217	1.47462	0.0702948	0.399052	0.35902	2757	tags=67%, list=29%, signal=48%	50529/22596/74778/67941/110816/16785/20103/20104/20044/75617/20085/20054
GO:0050820	GO:0050820	positive regulation of coagulation	14	0.483124	1.37092	0.112832	0.478889	0.430847	681	tags=29%, list=7%, signal=27%	18816/12491/14062/20443
GO:0006284	GO:0006284	base-excision repair	29	0.483096	1.68609	0.0189141	0.191968	0.17271	1814	tags=41%, list=19%, signal=34%	18973/77782/234258/18971/18538/11545/22256/327762/68240/268395/16881/18207
GO:0035082	GO:0035082	axoneme assembly	18	0.481283	1.46872	0.0725624	0.402844	0.362431	311	tags=17%, list=3%, signal=16%	213402/26942/319953
GO:0010824	GO:0010824	regulation of centrosome duplication	33	0.480631	1.72028	0.00703582	0.108153	0.0973031	2087	tags=48%, list=22%, signal=38%	100502766/20460/98956/68729/12449/17245/209334/14534/68953/20873/18148/69871/93759/219103/26425/234852
GO:0031577	GO:0031577	spindle checkpoint signaling	39	0.480553	1.79696	0.00506208	0.0935591	0.0841734	2168	tags=41%, list=23%, signal=32%	208628/68014/70385/20460/12235/12236/17120/67177/209334/66977/11799/18817/67052/229841/16319/22137
GO:0051131	GO:0051131	chaperone-mediated protein complex assembly	15	0.47861	1.38469	0.116438	0.485653	0.436933	1160	tags=33%, list=12%, signal=29%	73635/66506/67564/14976/56424
GO:0048146	GO:0048146	positive regulation of fibroblast proliferation	46	0.478281	1.84545	0.0013634	0.0462819	0.041639	522	tags=20%, list=5%, signal=19%	319583/23834/12575/110606/54635/16000/12428/18595/67153
GO:0000079	GO:0000079	regulation of cyclin-dependent protein serine/threonine kinase activity	53	0.477563	1.91692	0.00078271	0.0310042	0.0278939	1391	tags=34%, list=14%, signal=29%	12447/56742/12578/23834/12575/20460/12450/12428/12580/12144/53380/12449/12448/69237/13649/380694/12444/18817
GO:1901031	GO:1901031	regulation of response to reactive oxygen species	25	0.47605	1.59413	0.0400253	0.301932	0.271643	981	tags=32%, list=10%, signal=29%	15234/12491/13857/13804/66725/14528/75747/13361
GO:0045132	GO:0045132	meiotic chromosome segregation	62	0.475558	1.94298	0.000269574	0.0176342	0.0158652	1972	tags=48%, list=21%, signal=39%	268465/71846/12316/12447/211651/76915/217716/237911/12235/12236/215387/52683/12448/68549/12190/105988/28135/66977/69928/18817/77053/70099/21973/68767/19183/67052/229841/223593/74117/14211
GO:0033046	GO:0033046	negative regulation of sister chromatid segregation	38	0.473564	1.74413	0.00488902	0.0926885	0.0833901	2168	tags=39%, list=23%, signal=31%	208628/68014/70385/12235/12236/17120/67177/209334/66977/11799/18817/67052/229841/16319/22137
GO:0033048	GO:0033048	negative regulation of mitotic sister chromatid segregation	38	0.473564	1.74413	0.00488902	0.0926885	0.0833901	2168	tags=39%, list=23%, signal=31%	208628/68014/70385/12235/12236/17120/67177/209334/66977/11799/18817/67052/229841/16319/22137
GO:0045841	GO:0045841	negative regulation of mitotic metaphase/anaphase transition	38	0.473564	1.74413	0.00488902	0.0926885	0.0833901	2168	tags=39%, list=23%, signal=31%	208628/68014/70385/12235/12236/17120/67177/209334/66977/11799/18817/67052/229841/16319/22137
GO:2000816	GO:2000816	negative regulation of mitotic sister chromatid separation	38	0.473564	1.74413	0.00488902	0.0926885	0.0833901	2168	tags=39%, list=23%, signal=31%	208628/68014/70385/12235/12236/17120/67177/209334/66977/11799/18817/67052/229841/16319/22137
GO:0051985	GO:0051985	negative regulation of chromosome segregation	40	0.473402	1.79003	0.00293055	0.0738949	0.0664819	2168	tags=40%, list=23%, signal=31%	208628/68014/70385/12235/214901/12236/17120/67177/209334/66977/11799/18817/67052/229841/16319/22137
GO:0045910	GO:0045910	negative regulation of DNA recombination	28	0.471999	1.61369	0.0291286	0.244719	0.220169	613	tags=25%, list=6%, signal=23%	58186/223970/75317/77782/226409/17688/12144
GO:0009063	GO:0009063	amino acid catabolic process	42	0.471959	1.7965	0.00194505	0.0583598	0.0525052	1898	tags=38%, list=20%, signal=31%	11846/70789/18125/12040/108037/227095/229517/68133/26912/269378/12036/18242/71562/110826/12035/50880
GO:2000780	GO:2000780	negative regulation of double-strand break repair	21	0.470287	1.4929	0.0695221	0.396793	0.356987	1862	tags=38%, list=19%, signal=31%	223970/69885/75317/77782/94232/14897/27223/117599
GO:0051291	GO:0051291	protein heterooligomerization	17	0.470054	1.40515	0.0946882	0.442113	0.397761	1072	tags=35%, list=11%, signal=31%	14812/16661/20135/330189/234309/23874
GO:0032770	GO:0032770	positive regulation of monooxygenase activity	16	0.469631	1.37409	0.113689	0.479978	0.431827	981	tags=31%, list=10%, signal=28%	22337/21926/52014/14528/13361
GO:0006221	GO:0006221	pyrimidine nucleotide biosynthetic process	18	0.468297	1.42909	0.0884354	0.431778	0.388462	2106	tags=56%, list=22%, signal=43%	22171/22245/18103/80914/21915/18102/51797/110074/54369/22247
GO:0061436	GO:0061436	establishment of skin barrier	16	0.468	1.36932	0.12065	0.490408	0.441211	1943	tags=38%, list=20%, signal=30%	12737/12550/16173/54135/99138/18810
GO:0030279	GO:0030279	negative regulation of ossification	24	0.466808	1.53073	0.0232912	0.212227	0.190937	37	tags=8%, list=0%, signal=8%	21990/22337
GO:0060561	GO:0060561	apoptotic process involved in morphogenesis	18	0.46561	1.42089	0.0929705	0.438576	0.394579	1600	tags=39%, list=17%, signal=32%	22337/12578/12018/73699/105782/12028/14367
GO:0072528	GO:0072528	pyrimidine-containing compound biosynthetic process	20	0.464871	1.46718	0.0622222	0.376632	0.338849	2106	tags=55%, list=22%, signal=43%	22171/22245/18103/80914/21915/18102/29807/51797/110074/54369/22247
GO:0008543	GO:0008543	fibroblast growth factor receptor signaling pathway	35	0.46342	1.6726	0.0186567	0.189739	0.170705	840	tags=29%, list=9%, signal=26%	26427/101540/14462/16558/12393/80752/396184/72043/20419/116701
GO:0070199	GO:0070199	establishment of protein localization to chromosome	21	0.461935	1.46638	0.0660592	0.388024	0.349098	2736	tags=62%, list=28%, signal=44%	224008/12190/12462/20174/69917/21454/12466/216853/68845/12461/12465/12468/622675
GO:0007080	GO:0007080	mitotic metaphase plate congression	46	0.461336	1.78006	0.00274027	0.070177	0.063137	2127	tags=43%, list=22%, signal=34%	56742/100502766/70385/17120/105513/67177/381293/53869/225898/66977/68953/11799/228421/13589/67052/229841/67849/16319/234852/110033
GO:1901606	GO:1901606	alpha-amino acid catabolic process	33	0.461279	1.65102	0.0129266	0.158785	0.142856	1593	tags=33%, list=17%, signal=28%	11846/70789/18125/108037/227095/68133/26912/269378/12036/18242/71562
GO:0043094	GO:0043094	cellular metabolic compound salvage	22	0.460831	1.47609	0.0819812	0.420768	0.378557	1349	tags=36%, list=14%, signal=31%	67873/234730/11486/66902/22245/80914/11821/56369
GO:0007127	GO:0007127	meiosis I	63	0.460303	1.88199	0.000388691	0.0216976	0.0195209	1887	tags=43%, list=20%, signal=35%	268465/623474/71846/17864/12447/211651/19362/76915/217716/237911/214901/12448/68549/12190/19361/105988/28135/11799/69928/18817/235559/15512/77053/21973/19183/67052/229841
GO:0045143	GO:0045143	homologous chromosome segregation	28	0.459611	1.57134	0.03776	0.291408	0.262174	1540	tags=43%, list=16%, signal=36%	71846/12447/211651/76915/217716/237911/12448/12190/105988/28135/18817/77053
GO:0051310	GO:0051310	metaphase plate congression	57	0.459264	1.85708	0.000750044	0.0310042	0.0278939	2127	tags=44%, list=22%, signal=34%	56742/100502766/70385/54141/17120/105513/67177/83815/381293/53869/12190/225898/66977/68953/11799/228421/71878/217449/13589/67052/229841/67849/16319/234852/110033
GO:1902100	GO:1902100	negative regulation of metaphase/anaphase transition of cell cycle	39	0.45767	1.71139	0.0112176	0.146217	0.131549	2168	tags=38%, list=23%, signal=30%	208628/68014/70385/12235/12236/17120/67177/209334/66977/11799/18817/67052/229841/16319/22137
GO:1905819	GO:1905819	negative regulation of chromosome separation	39	0.45767	1.71139	0.0112176	0.146217	0.131549	2168	tags=38%, list=23%, signal=30%	208628/68014/70385/12235/12236/17120/67177/209334/66977/11799/18817/67052/229841/16319/22137
GO:0010874	GO:0010874	regulation of cholesterol efflux	20	0.457274	1.4432	0.0777778	0.410889	0.369669	767	tags=20%, list=8%, signal=18%	22259/19016/67484/11307
GO:2000279	GO:2000279	negative regulation of DNA biosynthetic process	31	0.456501	1.61562	0.0212002	0.200346	0.180248	406	tags=16%, list=4%, signal=15%	19016/16526/12575/98956/12649
GO:0046599	GO:0046599	regulation of centriole replication	18	0.456458	1.39296	0.0952381	0.442652	0.398246	2563	tags=56%, list=27%, signal=41%	20460/68729/17245/14534/20873/18148/69871/219103/212514/20620
GO:0061982	GO:0061982	meiosis I cell cycle process	64	0.456408	1.87628	0.000482276	0.0255048	0.0229462	1887	tags=42%, list=20%, signal=34%	268465/623474/71846/17864/12447/211651/19362/76915/217716/237911/214901/12448/68549/12190/19361/105988/28135/11799/69928/18817/235559/15512/77053/21973/19183/67052/229841
GO:1901797	GO:1901797	negative regulation of signal transduction by p53 class mediator	20	0.45531	1.437	0.0777778	0.410889	0.369669	1945	tags=50%, list=20%, signal=40%	226419/53380/106298/75736/28135/67211/12505/80751/69076/93759
GO:0006260	GO:0006260	DNA replication	209	0.455158	2.25597	1e-10	2.512e-07	2.26e-07	1956	tags=40%, list=20%, signal=32%	72749/319583/52679/79456/18973/382207/268465/18392/12447/12544/21853/223970/110749/101612/23834/108961/14156/17219/80905/17215/17216/268936/77782/12428/17218/226409/214901/19075/13804/212377/17217/12144/69263/70024/225182/68026/18971/27354/67177/12448/69237/272551/320209/218973/18538/18968/13649/21681/71567/209334/59001/12190/19361/66131/72960/69928/12189/106344/11545/72151/14245/69724/327762/682…
GO:0033344	GO:0033344	cholesterol efflux	29	0.453948	1.58436	0.0342495	0.273126	0.245726	767	tags=21%, list=8%, signal=19%	22259/19016/11812/244152/67484/11307
GO:0045738	GO:0045738	negative regulation of DNA repair	22	0.452669	1.44995	0.0695067	0.396793	0.356987	1862	tags=36%, list=19%, signal=29%	223970/69885/75317/77782/94232/14897/27223/117599
GO:0060443	GO:0060443	mammary gland morphogenesis	27	0.452038	1.54344	0.0569338	0.36348	0.327016	519	tags=19%, list=5%, signal=18%	22337/19876/12578/13836/11835
GO:1903046	GO:1903046	meiotic cell cycle process	111	0.451857	2.05718	4.23034e-06	0.00110349	0.00099279	1972	tags=42%, list=21%, signal=34%	20112/268465/623474/14087/71846/17864/12316/12447/211651/19362/76915/217716/237911/12235/214901/12236/215387/52683/15574/103733/64707/12448/68549/68298/12190/19361/105988/28135/66977/11799/69928/228421/18817/235559/15512/77053/70099/21973/68767/28114/19360/19183/67052/229841/223593/74117/14211
GO:0046605	GO:0046605	regulation of centrosome cycle	42	0.449939	1.71268	0.00412062	0.0873502	0.0785873	2656	tags=55%, list=28%, signal=40%	100502766/20460/107503/233064/98956/68729/12449/232944/17245/209334/14534/68953/20873/18148/69871/93759/219103/26425/234852/244329/212514/20620/103573
GO:2000001	GO:2000001	regulation of DNA damage checkpoint	20	0.448762	1.41634	0.0866667	0.429402	0.386325	1187	tags=30%, list=12%, signal=26%	67153/65964/241627/12190/19361/12189
GO:0032878	GO:0032878	regulation of establishment or maintenance of cell polarity	20	0.448164	1.41445	0.0866667	0.429402	0.386325	886	tags=30%, list=9%, signal=27%	16000/14462/227753/263406/240641/71653
GO:0051303	GO:0051303	establishment of chromosome localization	64	0.447842	1.84107	0.000803444	0.0313257	0.0281832	2127	tags=42%, list=22%, signal=33%	56742/100502766/70385/54141/17120/105513/67177/83815/381293/53869/12190/225898/28135/66977/68953/11799/228421/71878/77053/217449/13589/67052/229841/67849/16319/234852/110033
GO:0010332	GO:0010332	response to gamma radiation	39	0.447054	1.67169	0.0155655	0.172516	0.15521	725	tags=21%, list=8%, signal=19%	319583/74041/211651/12575/233805/65964/22596/12018
GO:0044818	GO:0044818	mitotic G2/M transition checkpoint	43	0.446348	1.70636	0.00589005	0.0996953	0.0896941	1776	tags=37%, list=18%, signal=30%	18392/23834/12575/12450/12649/269582/12144/15574/225182/27354/79263/12189/18817/235559/19360/69917
GO:0000725	GO:0000725	recombinational repair	119	0.445642	2.06242	1.2074e-06	0.000463044	0.000416592	1956	tags=39%, list=20%, signal=31%	72749/79456/623474/12544/21853/223970/69885/19362/66233/75317/17219/17215/17216/12649/77782/69596/17218/212377/17217/224008/12144/15574/22596/225182/27354/272551/71567/209334/12190/19361/59029/12189/11545/68501/94232/68240/75764/59004/20174/69917/27223/12545/117599/216853/56515/17220
GO:1904029	GO:1904029	regulation of cyclin-dependent protein kinase activity	55	0.445375	1.79292	0.000925897	0.0347142	0.0312318	1391	tags=33%, list=14%, signal=28%	12447/56742/12578/23834/12575/20460/12450/12428/12580/12144/53380/12449/12448/69237/13649/380694/12444/18817
GO:0051220	GO:0051220	cytoplasmic sequestering of protein	20	0.444669	1.40342	0.0866667	0.429402	0.386325	1871	tags=40%, list=19%, signal=32%	24069/21335/53380/17120/192176/54638/18036/56320
GO:0000724	GO:0000724	double-strand break repair via homologous recombination	116	0.443738	2.03941	1.27843e-06	0.000463044	0.000416592	1956	tags=39%, list=20%, signal=31%	72749/79456/623474/12544/21853/223970/69885/19362/66233/75317/17219/17215/17216/12649/77782/69596/17218/212377/17217/224008/12144/15574/225182/27354/272551/71567/209334/12190/19361/59029/12189/11545/68501/94232/68240/75764/59004/20174/69917/27223/12545/117599/216853/56515/17220
GO:0051304	GO:0051304	chromosome separation	62	0.441081	1.80212	0.00142084	0.0470266	0.042309	2168	tags=40%, list=23%, signal=31%	208628/68014/70385/12235/12236/215387/52683/17120/67177/209334/68298/105988/66977/11799/68501/18817/70099/21973/76044/67052/229841/14211/54392/16319/22137
GO:0140013	GO:0140013	meiotic nuclear division	102	0.440996	1.97258	1.24964e-05	0.00224221	0.00201727	1972	tags=41%, list=21%, signal=33%	20112/268465/623474/14087/71846/17864/12316/12447/211651/19362/76915/217716/237911/12235/214901/12236/215387/52683/64707/12448/68549/12190/19361/105988/28135/66977/11799/69928/228421/18817/235559/15512/77053/70099/21973/68767/19183/67052/229841/223593/74117/14211
GO:0051306	GO:0051306	mitotic sister chromatid separation	48	0.440652	1.71478	0.00376617	0.0830926	0.0747569	1391	tags=27%, list=14%, signal=23%	208628/68014/70385/12235/12236/52683/17120/67177/209334/66977/11799/68501/18817
GO:0009303	GO:0009303	rRNA transcription	28	0.44043	1.50576	0.0564664	0.363226	0.326787	2778	tags=46%, list=29%, signal=33%	12578/103136/18150/13871/64424/18148/75678/68845/21453/66467/21945/22059/56717
GO:0033522	GO:0033522	histone H2A ubiquitination	20	0.44034	1.38975	0.0933333	0.439875	0.395747	1811	tags=40%, list=19%, signal=33%	68729/22658/22209/12190/19361/12189/76073/14897
GO:2000278	GO:2000278	regulation of DNA biosynthetic process	92	0.439872	1.91879	4.12709e-05	0.00531653	0.00478319	2120	tags=40%, list=22%, signal=32%	382207/15234/19016/16526/12575/98956/12649/101540/21926/214901/18761/69263/22596/59047/234344/272551/21781/18538/74108/11692/106344/72151/11622/18148/20399/12462/51812/12387/21454/12466/214627/216853/22791/26400/69270/12461/12465
GO:0002902	GO:0002902	regulation of B cell apoptotic process	18	0.439334	1.3407	0.115646	0.484172	0.435601	1960	tags=33%, list=20%, signal=27%	209488/11486/12505/12028/384783/57741
GO:0048741	GO:0048741	skeletal muscle fiber development	25	0.436926	1.46312	0.0899098	0.433512	0.390023	657	tags=16%, list=7%, signal=15%	72330/17927/227325/208727
GO:0051767	GO:0051767	nitric-oxide synthase biosynthetic process	18	0.436864	1.33317	0.120181	0.489296	0.440211	1964	tags=39%, list=20%, signal=31%	225884/110606/66725/26420/26398/16452/26397
GO:0051769	GO:0051769	regulation of nitric-oxide synthase biosynthetic process	18	0.436864	1.33317	0.120181	0.489296	0.440211	1964	tags=39%, list=20%, signal=31%	225884/110606/66725/26420/26398/16452/26397
GO:0014904	GO:0014904	myotube cell development	28	0.436445	1.49214	0.0606234	0.372793	0.335395	657	tags=18%, list=7%, signal=17%	72330/17927/227325/16000/208727
GO:1905818	GO:1905818	regulation of chromosome separation	57	0.436381	1.76455	0.00206126	0.0590261	0.0531047	2168	tags=40%, list=23%, signal=31%	208628/68014/70385/12235/12236/215387/52683/17120/67177/209334/68298/66977/11799/68501/18817/70099/76044/67052/229841/14211/54392/16319/22137
GO:0090303	GO:0090303	positive regulation of wound healing	29	0.435033	1.51834	0.0503438	0.344587	0.310019	1150	tags=24%, list=12%, signal=21%	12737/18816/12491/14062/20443/14083/16952
GO:1904645	GO:1904645	response to amyloid-beta	29	0.434773	1.51744	0.0503438	0.344587	0.310019	561	tags=21%, list=6%, signal=20%	108071/12287/12491/22329/16000/17390
GO:2000573	GO:2000573	positive regulation of DNA biosynthetic process	55	0.4333	1.74431	0.00154553	0.0504204	0.0453623	2120	tags=45%, list=22%, signal=36%	15234/101540/21926/214901/18761/69263/22596/59047/234344/272551/18538/74108/11692/106344/72151/18148/12462/12387/21454/12466/216853/26400/69270/12461/12465
GO:0015908	GO:0015908	fatty acid transport	45	0.430386	1.64983	0.00704807	0.108153	0.0973031	2379	tags=44%, list=25%, signal=34%	11770/11421/19016/11520/12491/68039/16592/26457/16952/14081/384783/26420/19300/11652/16176/433256/11666/11816/20524/12140
GO:0010965	GO:0010965	regulation of mitotic sister chromatid separation	45	0.430384	1.64983	0.00704807	0.108153	0.0973031	2168	tags=36%, list=23%, signal=28%	208628/68014/70385/12235/12236/17120/67177/209334/66977/11799/68501/18817/67052/229841/16319/22137
GO:0061512	GO:0061512	protein localization to cilium	27	0.430288	1.46917	0.0952443	0.442652	0.398246	2538	tags=52%, list=26%, signal=38%	74682/64436/320234/81896/226422/106039/231214/94187/110350/100503572/22141/56350/55978/14569
GO:0051353	GO:0051353	positive regulation of oxidoreductase activity	38	0.427218	1.57344	0.0190506	0.19211	0.172838	2359	tags=45%, list=25%, signal=34%	22337/21926/56532/52014/14528/14297/13361/67905/68002/11352/16176/18984/13057/382051/14679/11816/68165
GO:1901661	GO:1901661	quinone metabolic process	22	0.424449	1.35955	0.0986547	0.450766	0.405546	1712	tags=36%, list=18%, signal=30%	234309/11677/210582/109857/12850/76889/58810/66108
GO:0001783	GO:0001783	B cell apoptotic process	23	0.423824	1.37004	0.0857788	0.428886	0.38586	1563	tags=26%, list=16%, signal=22%	209488/11486/12018/12505/12028/384783
GO:0015986	GO:0015986	proton motive force-driven ATP synthesis	44	0.423493	1.62592	0.00923983	0.129306	0.116334	4371	tags=77%, list=45%, signal=42%	230075/66925/66046/66108/28080/67942/66414/54405/68073/11951/67273/66916/67264/11946/57423/68194/66218/68342/228033/17991/66114/68197/66043/72900/104130/67126/66377/70316/11957/17993/11958/67130/11947/68375
GO:0070613	GO:0070613	regulation of protein processing	43	0.422773	1.61624	0.0142229	0.165791	0.149159	1186	tags=28%, list=12%, signal=25%	18816/20112/268973/17387/227753/12550/13024/66725/245866/233744/75736/20194
GO:1902410	GO:1902410	mitotic cytokinetic process	20	0.422499	1.33345	0.115556	0.484172	0.435601	1318	tags=30%, list=14%, signal=26%	216846/74107/240641/105513/68953/19348
GO:1905314	GO:1905314	semi-lunar valve development	20	0.42176	1.33111	0.115556	0.484172	0.435601	1058	tags=25%, list=11%, signal=22%	19876/13717/14462/12006/268902
GO:0071897	GO:0071897	DNA biosynthetic process	131	0.421361	1.98132	6.3741e-06	0.00133431	0.00120045	2120	tags=37%, list=22%, signal=30%	319583/18973/382207/15234/19016/16526/12575/80905/98956/12649/101540/21877/21926/214901/18761/69263/22596/68026/18971/59047/234344/272551/21781/18538/18968/52530/74108/11692/106344/72151/11622/18148/20399/12462/16881/51812/12387/20133/19360/21454/12466/214627/216853/22791/93759/26400/69270/12461/12465
GO:0046189	GO:0046189	phenol-containing compound biosynthetic process	24	0.419967	1.37714	0.075	0.408677	0.367679	810	tags=21%, list=8%, signal=19%	21990/14462/12705/67903/14528
GO:0009066	GO:0009066	aspartate family amino acid metabolic process	23	0.419522	1.35613	0.0925508	0.438576	0.394579	2303	tags=48%, list=24%, signal=36%	67873/66902/26432/11898/26912/27053/56369/52633/236539/14719/11565
GO:1901889	GO:1901889	negative regulation of cell junction assembly	23	0.41882	1.35387	0.0948081	0.442262	0.397895	425	tags=22%, list=4%, signal=21%	19249/11421/74762/17387/21926
GO:0002701	GO:0002701	negative regulation of production of molecular mediator of immune response	24	0.417306	1.36841	0.0772727	0.410889	0.369669	541	tags=21%, list=6%, signal=20%	11846/69550/26362/21926/12483
GO:0003382	GO:0003382	epithelial cell morphogenesis	23	0.417238	1.34875	0.0993228	0.450766	0.405546	1117	tags=30%, list=12%, signal=27%	72333/20733/12550/11835/53868/77446/105782
GO:0010389	GO:0010389	regulation of G2/M transition of mitotic cell cycle	79	0.416878	1.78327	0.000591912	0.0291546	0.0262298	1835	tags=37%, list=19%, signal=30%	18392/12578/23834/12575/12450/12649/67153/269582/18761/12144/15574/225182/27354/381293/53869/116871/30963/79263/12189/18817/16906/235559/15512/20133/19360/69917/108911/12566/12545
GO:0007093	GO:0007093	mitotic cell cycle checkpoint signaling	110	0.415364	1.88354	4.41906e-05	0.00555034	0.00499354	1187	tags=25%, list=12%, signal=22%	208628/268465/18392/68014/211651/23834/70385/12575/20460/12450/12649/12235/269582/12236/12144/15574/65964/225182/27354/17120/67177/209334/79263/66131/66977/11799/12189
GO:0042771	GO:0042771	intrinsic apoptotic signaling pathway in response to DNA damage by p53 class mediator	35	0.415278	1.49884	0.0560674	0.361496	0.325231	2093	tags=37%, list=22%, signal=29%	27280/12575/12190/75736/12505/235323/15951/69076/68048/17685/67941/93759/50883
GO:1902749	GO:1902749	regulation of cell cycle G2/M phase transition	88	0.415021	1.80158	0.000831866	0.0321484	0.0289233	1835	tags=36%, list=19%, signal=30%	18392/12578/23834/12575/226419/107503/12450/12649/67153/269582/18761/12144/15574/225182/27354/381293/53869/116871/30963/79263/12189/18817/16906/235559/15512/18148/20133/19360/69917/108911/12566/12545
GO:1902750	GO:1902750	negative regulation of cell cycle G2/M phase transition	52	0.414078	1.64951	0.00900445	0.126718	0.114006	1776	tags=33%, list=18%, signal=27%	18392/23834/12575/107503/12450/12649/269582/12144/15574/225182/27354/79263/12189/18817/235559/19360/69917
GO:0051955	GO:0051955	regulation of amino acid transport	25	0.413243	1.38381	0.0715884	0.401884	0.361567	862	tags=16%, list=9%, signal=15%	11846/14812/21926/94245
GO:0050886	GO:0050886	endocrine process	35	0.412179	1.48766	0.05821	0.365556	0.328884	500	tags=23%, list=5%, signal=22%	18816/22337/20112/20750/11421/19016/14462/14062
GO:0042776	GO:0042776	proton motive force-driven mitochondrial ATP synthesis	41	0.410239	1.54913	0.0183579	0.187491	0.168682	4371	tags=76%, list=45%, signal=41%	230075/66925/66046/66108/28080/66414/54405/68073/67273/66916/67264/11946/57423/68194/66218/68342/17991/66114/68197/66043/72900/104130/67126/66377/70316/11957/17993/11958/67130/11947/68375
GO:0032768	GO:0032768	regulation of monooxygenase activity	26	0.409182	1.39117	0.0764045	0.410889	0.369669	981	tags=27%, list=10%, signal=24%	22337/11605/21926/52014/14528/13649/13361
GO:0000027	GO:0000027	ribosomal large subunit assembly	23	0.408446	1.32033	0.115124	0.483598	0.435085	3453	tags=57%, list=36%, signal=36%	217011/67832/68017/11837/67025/110954/12181/68193/268449/110109/66448/19988/69902
GO:2001251	GO:2001251	negative regulation of chromosome organization	80	0.406444	1.73775	0.000776777	0.0310042	0.0278939	1887	tags=29%, list=20%, signal=23%	79456/208628/68014/70385/17216/98956/12235/12236/27354/17120/67177/209334/66977/11799/11545/18817/21973/51812/19360/13870/67052/214627/229841
GO:0000731	GO:0000731	DNA synthesis involved in DNA repair	26	0.406173	1.38094	0.0831461	0.422372	0.38	928	tags=23%, list=10%, signal=21%	18973/80905/68026/18971/18538/18968
GO:0045740	GO:0045740	positive regulation of DNA replication	39	0.405683	1.51699	0.0361818	0.284917	0.256335	1835	tags=33%, list=19%, signal=27%	52679/108961/268936/13804/67177/18538/13649/14245/327762/18148/26398/12566/12545
GO:0045923	GO:0045923	positive regulation of fatty acid metabolic process	27	0.405346	1.38401	0.0884354	0.431778	0.388462	2279	tags=48%, list=24%, signal=37%	22259/19016/53322/16952/12894/384783/11813/26420/11652/16176/56690/433256/11666
GO:0022616	GO:0022616	DNA strand elongation	34	0.405301	1.46072	0.048125	0.338154	0.30423	2072	tags=44%, list=22%, signal=35%	18973/17215/17217/27354/18538/18968/59001/327762/140917/16881/20174/51812/19360/17220/69270
GO:0061180	GO:0061180	mammary gland epithelium development	44	0.405067	1.55518	0.0175296	0.18518	0.166603	519	tags=16%, list=5%, signal=15%	22337/404710/19876/12578/14462/13836/11835
GO:0044344	GO:0044344	cellular response to fibroblast growth factor stimulus	45	0.404958	1.55236	0.0168053	0.181961	0.163707	1271	tags=29%, list=13%, signal=25%	26427/101540/14462/16558/12393/80752/396184/72043/20419/116701/15587/29875/12505
GO:0044774	GO:0044774	mitotic DNA integrity checkpoint signaling	62	0.404399	1.65225	0.00632615	0.101448	0.0912708	1480	tags=27%, list=15%, signal=23%	268465/18392/211651/23834/12575/12450/12649/269582/12144/15574/65964/27354/79263/66131/12189/18817/235559
GO:1902742	GO:1902742	apoptotic process involved in development	24	0.40436	1.32596	0.106818	0.468462	0.421467	1600	tags=33%, list=17%, signal=28%	22337/12578/12649/12018/73699/105782/12028/14367
GO:1903317	GO:1903317	regulation of protein maturation	45	0.403864	1.54817	0.0175092	0.18518	0.166603	1186	tags=27%, list=12%, signal=23%	18816/20112/268973/17387/227753/12550/13024/66725/245866/233744/75736/20194
GO:0007095	GO:0007095	mitotic G2 DNA damage checkpoint signaling	31	0.403526	1.42814	0.0645161	0.382228	0.343883	1480	tags=32%, list=15%, signal=27%	12575/12450/12649/269582/12144/27354/79263/12189/18817/235559
GO:1903350	GO:1903350	response to dopamine	24	0.403343	1.32262	0.111364	0.47495	0.427304	2187	tags=42%, list=23%, signal=32%	11512/66725/18483/94245/14687/21817/192176/118445/18197/14679
GO:1903351	GO:1903351	cellular response to dopamine	24	0.403343	1.32262	0.111364	0.47495	0.427304	2187	tags=42%, list=23%, signal=32%	11512/66725/18483/94245/14687/21817/192176/118445/18197/14679
GO:0071774	GO:0071774	response to fibroblast growth factor	46	0.401413	1.54885	0.0225989	0.208324	0.187425	1271	tags=28%, list=13%, signal=25%	26427/101540/14462/16558/12393/80752/396184/72043/20419/116701/15587/29875/12505
GO:0043039	GO:0043039	tRNA aminoacylation	34	0.39994	1.4414	0.0558529	0.361496	0.325231	1979	tags=38%, list=21%, signal=30%	70560/76563/224805/71807/23874/22321/110960/71984/353172/97541/20226/85305/66590
GO:0098781	GO:0098781	ncRNA transcription	50	0.399931	1.57328	0.0151117	0.170609	0.153494	2238	tags=36%, list=23%, signal=28%	17927/17864/12578/102209/330959/103136/18150/13716/13871/64424/18148/212139/75678/77634/68845/21453/66467/21945
GO:0045454	GO:0045454	cell redox homeostasis	24	0.399918	1.31139	0.118182	0.487451	0.438551	3037	tags=58%, list=32%, signal=40%	18477/53381/50493/21672/22166/11758/56551/216963/11792/14782/14775/69227/54683/13382
GO:0033047	GO:0033047	regulation of mitotic sister chromatid segregation	43	0.399834	1.52854	0.0265322	0.230084	0.207002	1391	tags=26%, list=14%, signal=22%	208628/68014/70385/12235/12236/17120/67177/209334/66977/11799/18817
GO:0050000	GO:0050000	chromosome localization	70	0.399561	1.66645	0.00464049	0.0921494	0.0829051	2127	tags=41%, list=22%, signal=32%	56742/100502766/70385/54141/17120/105513/67177/83815/381293/53869/12190/225898/28135/66977/68953/11799/228421/71878/77053/217449/16905/13589/67052/229841/67849/74117/16319/234852/110033
GO:0043038	GO:0043038	amino acid activation	35	0.397259	1.43381	0.0811075	0.420087	0.377944	1979	tags=37%, list=21%, signal=30%	70560/76563/224805/71807/23874/22321/110960/71984/353172/97541/20226/85305/66590
GO:0030330	GO:0030330	DNA damage response, signal transduction by p53 class mediator	49	0.395544	1.54573	0.0232451	0.212227	0.190937	2093	tags=33%, list=22%, signal=26%	52679/15248/12578/12575/226419/53380/12190/14235/12505/18148/66143/69076/67941/93759/83383/50883
GO:0051053	GO:0051053	negative regulation of DNA metabolic process	103	0.394789	1.7668	0.000238975	0.01691	0.0152136	1932	tags=32%, list=20%, signal=26%	58186/21853/19016/16526/223970/69885/12575/75317/98956/12649/77782/14462/226409/17688/12144/22596/27354/67177/69237/66131/11545/94232/11622/51812/17685/19360/14897/13870/27223/117599/214627/22791/57441
GO:0000075	GO:0000075	cell cycle checkpoint signaling	148	0.394753	1.8716	2.02129e-05	0.00298675	0.00268713	1899	tags=31%, list=20%, signal=25%	208628/268465/18392/68014/21853/211651/23834/70385/12575/20460/12450/12649/12235/67153/269582/12236/12144/15574/65964/241627/225182/27354/17120/67177/80285/209334/79263/12190/19361/66131/66977/11799/12189/235323/327762/18817/235559/17685/226591/28114/19360/69917/27223/67052/229841/67941
GO:0010972	GO:0010972	negative regulation of G2/M transition of mitotic cell cycle	51	0.394564	1.56195	0.0217892	0.204805	0.184259	1776	tags=31%, list=18%, signal=26%	18392/23834/12575/12450/12649/269582/12144/15574/225182/27354/79263/12189/18817/235559/19360/69917
GO:0006310	GO:0006310	DNA recombination	214	0.392548	1.94349	8.77852e-08	0.000110258	9.91973e-05	1956	tags=35%, list=20%, signal=28%	72749/319583/79456/268465/623474/58186/12544/21853/223970/69885/72103/211651/19362/66233/76915/75317/17219/17215/17216/237911/12649/77782/69596/17218/226409/17688/214901/212377/17217/69583/224008/321006/12144/15574/22596/225182/27354/26909/272551/21681/71567/209334/12190/19361/59029/28135/69928/12189/11545/22256/68501/94232/21939/68240/75764/13871/235559/59004/16881/20174/21973/51812/17685/19360/…
GO:0043516	GO:0043516	regulation of DNA damage response, signal transduction by p53 class mediator	26	0.390821	1.32875	0.101124	0.454094	0.40854	1547	tags=27%, list=16%, signal=23%	15248/12578/226419/53380/12505/18148/66143
GO:0042789	GO:0042789	mRNA transcription by RNA polymerase II	40	0.388309	1.46828	0.0333792	0.268315	0.241398	1186	tags=20%, list=12%, signal=18%	22259/22337/19016/24075/99730/192176/20181/20194
GO:0006520	GO:0006520	amino acid metabolic process	140	0.387982	1.82906	5.95898e-05	0.00650824	0.00585535	1751	tags=33%, list=18%, signal=27%	21990/11846/229905/70789/18125/70560/76563/12040/67873/224805/66902/246221/71807/70266/107272/26432/108037/13361/227095/23874/22321/110960/229517/11898/68133/71984/26912/27053/353172/269378/56369/52633/12036/107885/97541/18263/50493/18242/71562/110826/236539/66194/20751/12035/51797/20226
GO:0022612	GO:0022612	gland morphogenesis	79	0.387721	1.65855	0.0020628	0.0590261	0.0531047	1271	tags=28%, list=13%, signal=24%	22337/15234/19876/12578/16000/17345/21926/13836/12550/11835/17390/16173/72043/67784/18844/13649/105782/21817/57764/20181/18590/12505
GO:0031570	GO:0031570	DNA integrity checkpoint signaling	98	0.386518	1.70822	0.00077727	0.0310042	0.0278939	1480	tags=27%, list=15%, signal=23%	268465/18392/21853/211651/23834/12575/12450/12649/67153/269582/12144/15574/65964/241627/27354/67177/80285/79263/12190/19361/66131/12189/235323/327762/18817/235559
GO:1904646	GO:1904646	cellular response to amyloid-beta	26	0.386502	1.31406	0.114607	0.482636	0.434218	365	tags=15%, list=4%, signal=15%	108071/12491/22329/16000
GO:0010948	GO:0010948	negative regulation of cell cycle process	218	0.38622	1.90761	4.52531e-07	0.000324788	0.000292206	1187	tags=23%, list=12%, signal=21%	93695/52679/79456/208628/20112/268465/18392/68014/21853/100502766/211651/23834/108961/69274/70385/12575/20460/107503/12450/233805/12649/68729/12235/214901/67153/269582/12236/12144/15574/65964/241627/19650/225182/27354/72611/17120/67177/80285/12449/17245/227292/209334/79263/14534/12190/19361/66131/66977/68953/11799/12189
GO:0006919	GO:0006919	activation of cysteine-type endopeptidase activity involved in apoptotic process	51	0.384871	1.52357	0.0303675	0.252057	0.226771	1899	tags=31%, list=20%, signal=25%	268973/19016/19876/12578/21926/14062/12018/53313/66593/223870/12028/223453/12122/26885/16452/67941
GO:0010569	GO:0010569	regulation of double-strand break repair via homologous recombination	53	0.384698	1.54416	0.0256713	0.226965	0.204196	1892	tags=34%, list=20%, signal=27%	21853/223970/19362/66233/75317/12649/77782/224008/12144/225182/19361/11545/94232/59004/20174/27223/117599/216853
GO:0002181	GO:0002181	cytoplasmic translation	124	0.382456	1.77514	0.000178076	0.0137639	0.0123831	3419	tags=63%, list=36%, signal=41%	66405/666794/16898/13685/269261/66480/13494/56726/225363/19896/19951/20226/19933/20042/20115/11837/27367/19921/16785/20103/67891/20084/22608/319195/67115/20492/19943/55944/19899/65019/20104/66521/67025/20055/68052/67427/19944/19989/20044/22121/78294/26961/13629/27207/218629/75617/56040/20085/12785/68193/67097/27176/27050/20054/268449/26451/19942/270106/98221/20068/18746/20102/20005/20091/114641/6…
GO:1901605	GO:1901605	alpha-amino acid metabolic process	93	0.381869	1.66851	0.00208877	0.0590261	0.0531047	1721	tags=33%, list=18%, signal=28%	11846/229905/70789/18125/67873/66902/246221/70266/107272/26432/108037/13361/227095/11898/68133/26912/27053/269378/56369/52633/12036/107885/18263/50493/18242/71562/236539/66194/20751/12035/51797
GO:0030071	GO:0030071	regulation of mitotic metaphase/anaphase transition	72	0.381464	1.59802	0.0101907	0.136529	0.122832	1391	tags=24%, list=14%, signal=20%	208628/68014/23834/70385/12235/29861/12236/329152/67045/17120/67177/209334/66977/11799/68501/59126/18817
GO:0071479	GO:0071479	cellular response to ionizing radiation	58	0.381352	1.53721	0.019081	0.19211	0.172838	1249	tags=28%, list=13%, signal=24%	319583/74041/19362/12575/14462/226691/224008/12144/15574/65964/22596/12190/19361/100040462/12189/12444
GO:0007091	GO:0007091	metaphase/anaphase transition of mitotic cell cycle	77	0.379608	1.6064	0.00542528	0.0960348	0.0864007	1391	tags=23%, list=14%, signal=20%	208628/68014/23834/70385/12235/29861/21335/12236/329152/67045/17120/67177/209334/66977/11799/68501/59126/18817
GO:0072088	GO:0072088	nephron epithelium morphogenesis	30	0.379028	1.33736	0.101149	0.454094	0.40854	1727	tags=30%, list=18%, signal=25%	18654/21853/381157/14462/12705/16202/12505/14260/12387
GO:0071868	GO:0071868	cellular response to monoamine stimulus	33	0.378761	1.35567	0.0909091	0.434978	0.391342	1147	tags=24%, list=12%, signal=21%	18125/11512/66725/18483/94245/14687/21817/192176
GO:0071870	GO:0071870	cellular response to catecholamine stimulus	33	0.378761	1.35567	0.0909091	0.434978	0.391342	1147	tags=24%, list=12%, signal=21%	18125/11512/66725/18483/94245/14687/21817/192176
GO:0006418	GO:0006418	tRNA aminoacylation for protein translation	31	0.378422	1.33929	0.108295	0.469277	0.4222	1979	tags=39%, list=21%, signal=31%	70560/224805/71807/23874/22321/110960/71984/353172/97541/20226/85305/66590
GO:0006302	GO:0006302	double-strand break repair	214	0.376556	1.86431	7.24715e-07	0.000364097	0.000327571	1956	tags=32%, list=20%, signal=26%	72749/319583/79456/268465/623474/12544/21853/223970/69885/72103/211651/19362/66233/75317/17219/17215/17216/237911/12649/77782/69596/17218/29861/212377/17217/224008/12144/15574/22596/225182/17314/59047/27354/80285/272551/104884/18968/71567/209334/12190/19361/14235/59029/12189/11545/68501/94232/327762/68240/75764/140917/72612/59004/16881/20174/17685/19360/69917/14897/13870/27223/12545/117599/216853…
GO:0051983	GO:0051983	regulation of chromosome segregation	104	0.375361	1.69024	0.000763967	0.0310042	0.0278939	2059	tags=32%, list=21%, signal=25%	208628/58186/68014/223970/23834/70385/17345/12235/214901/29861/21335/12236/329152/215387/52683/67045/17120/67177/209334/68298/66977/11799/68501/59126/18817/70099/76044/108911/67052/229841/14211/54392/16319
GO:1902099	GO:1902099	regulation of metaphase/anaphase transition of cell cycle	73	0.374351	1.56414	0.00627793	0.101448	0.0912708	1391	tags=23%, list=14%, signal=20%	208628/68014/23834/70385/12235/29861/12236/329152/67045/17120/67177/209334/66977/11799/68501/59126/18817
GO:0031952	GO:0031952	regulation of protein autophosphorylation	32	0.374103	1.32483	0.118329	0.487451	0.438551	1747	tags=38%, list=18%, signal=31%	93695/11421/54635/27354/74012/68473/29875/18590/14586/21754/71943/19360
GO:0042773	GO:0042773	ATP synthesis coupled electron transport	48	0.373096	1.45188	0.0343785	0.273288	0.245872	4070	tags=60%, list=42%, signal=35%	230075/67892/66925/12850/66072/12858/66694/22272/66445/12122/66414/69702/67273/67264/67914/57320/13382/268697/12534/66218/22273/56428/66152/13063/12857/68197/67003/72900/20463
GO:0042775	GO:0042775	mitochondrial ATP synthesis coupled electron transport	48	0.373096	1.45188	0.0343785	0.273288	0.245872	4070	tags=60%, list=42%, signal=35%	230075/67892/66925/12850/66072/12858/66694/22272/66445/12122/66414/69702/67273/67264/67914/57320/13382/268697/12534/66218/22273/56428/66152/13063/12857/68197/67003/72900/20463
GO:0044784	GO:0044784	metaphase/anaphase transition of cell cycle	78	0.372924	1.58513	0.0052081	0.0950867	0.0855477	1391	tags=23%, list=14%, signal=20%	208628/68014/23834/70385/12235/29861/21335/12236/329152/67045/17120/67177/209334/66977/11799/68501/59126/18817
GO:0042632	GO:0042632	cholesterol homeostasis	47	0.372637	1.44399	0.0461804	0.32956	0.296499	1945	tags=34%, list=20%, signal=27%	22259/11770/244152/76501/16173/52014/11307/16956/69071/14385/65970/70310/11303/54638/223593/93759
GO:0000086	GO:0000086	G2/M transition of mitotic cell cycle	100	0.372065	1.65209	0.00204603	0.0590261	0.0531047	1835	tags=33%, list=19%, signal=27%	18392/12578/23834/12575/12450/12649/12428/67153/269582/18761/12144/15574/225182/27354/18008/381293/53869/116871/30963/79263/14235/11799/12189/18817/16906/235559/15512/20133/19360/69917/108911/12566/12545
GO:0072028	GO:0072028	nephron morphogenesis	31	0.371394	1.31442	0.112903	0.478889	0.430847	1727	tags=29%, list=18%, signal=24%	18654/21853/381157/14462/12705/16202/12505/14260/12387
GO:1904407	GO:1904407	positive regulation of nitric oxide metabolic process	32	0.371035	1.31397	0.12065	0.490408	0.441211	2175	tags=38%, list=23%, signal=29%	77777/12491/21926/217203/14991/11629/11898/26420/11652/16452/16176/106759
GO:2000179	GO:2000179	positive regulation of neural precursor cell proliferation	38	0.366763	1.35078	0.0771028	0.410889	0.369669	1837	tags=34%, list=19%, signal=28%	12316/16000/233064/224171/20312/18008/71648/192176/19716/17242/252838/12387/94187
GO:1901976	GO:1901976	regulation of cell cycle checkpoint	38	0.366538	1.34995	0.0794393	0.416166	0.374416	1187	tags=26%, list=12%, signal=23%	67153/65964/241627/17120/67177/209334/12190/19361/11799/12189
GO:0007098	GO:0007098	centrosome cycle	102	0.366157	1.63782	0.00233164	0.0626426	0.0563584	2087	tags=40%, list=22%, signal=32%	100502766/20460/107503/233064/216846/98956/12649/219072/68729/277939/68026/207792/12449/232944/93737/17245/209334/381644/14534/12190/28135/68953/12189/20873/20501/18817/66296/18148/69871/230376/225745/16328/76478/12387/12566/76816/67052/93759/219103/26425/234852
GO:1901607	GO:1901607	alpha-amino acid biosynthetic process	36	0.36604	1.34088	0.0758294	0.410259	0.369103	1713	tags=36%, list=18%, signal=30%	67873/66902/107272/26432/108037/13361/11898/27053/56369/12036/236539/66194/12035
GO:0051865	GO:0051865	protein autoubiquitination	48	0.365887	1.42383	0.0447915	0.324254	0.291726	1454	tags=31%, list=15%, signal=27%	58186/18140/68729/67845/66725/22030/59009/66894/22209/12190/19361/56424/12189/66510/70097
GO:0055092	GO:0055092	sterol homeostasis	48	0.364325	1.41775	0.0468748	0.332626	0.299257	1945	tags=33%, list=20%, signal=27%	22259/11770/244152/76501/16173/52014/11307/16956/69071/14385/65970/70310/11303/54638/223593/93759
GO:0010823	GO:0010823	negative regulation of mitochondrion organization	37	0.364226	1.34606	0.0815851	0.420768	0.378557	1963	tags=43%, list=20%, signal=35%	15234/19016/16000/53380/12018/75712/14297/26949/67414/74919/66494/52538/69076/16905/381038/11740
GO:1901991	GO:1901991	negative regulation of mitotic cell cycle phase transition	132	0.364055	1.71592	0.000719935	0.0308393	0.0277456	1187	tags=22%, list=12%, signal=20%	93695/52679/208628/18392/68014/23834/69274/70385/12575/12450/233805/12649/12235/269582/12236/12144/15574/19650/225182/27354/72611/17120/67177/227292/209334/79263/66977/11799/12189
GO:0032543	GO:0032543	mitochondrial translation	116	0.36345	1.67041	0.000628599	0.029659	0.0266837	2405	tags=44%, list=25%, signal=33%	70560/76563/224805/94254/50529/67036/67212/56412/94065/228019/27393/66419/68611/66047/108037/56282/106338/69577/121022/71984/211253/107733/353172/67840/65111/68537/27395/71989/18100/66230/68565/94062/18120/66407/12261/64659/94064/27397/67681/118451/233870/59054/14548/353242/57312/68735/234384/67270/107734/229487/66077
GO:0051321	GO:0051321	meiotic cell cycle	144	0.362439	1.71668	0.000204372	0.0150995	0.0135848	1972	tags=37%, list=21%, signal=30%	20112/268465/623474/14087/71846/17864/12316/12447/211651/19362/76915/217716/237911/17345/12235/214901/12236/215387/52683/15574/225182/103733/27354/64707/26909/12448/68549/68298/12190/19361/105988/28135/66977/11799/69928/228421/18817/235559/15512/77053/70099/21973/68767/28114/19360/19183/195434/12566/67052/229841/223593/74117/14211
GO:0006275	GO:0006275	regulation of DNA replication	108	0.362353	1.6348	0.00255174	0.0671201	0.0603867	1956	tags=32%, list=20%, signal=26%	52679/382207/21853/108961/17219/17215/17216/268936/12428/17218/226409/214901/13804/17217/12144/69263/67177/69237/272551/18538/13649/59001/66131/106344/72151/14245/327762/18148/20174/51812/26398/12566/12545/57441/17220
GO:0045930	GO:0045930	negative regulation of mitotic cell cycle	171	0.362149	1.75018	5.44391e-05	0.00621595	0.00559238	1187	tags=23%, list=12%, signal=20%	93695/52679/208628/268465/18392/240843/68014/211651/23834/69274/70385/12575/20460/12450/233805/12649/21926/12235/269582/12236/12144/15574/65964/19650/225182/27354/72611/17120/67177/217011/13649/227292/209334/79263/66131/105782/66977/11799/12189
GO:0033045	GO:0033045	regulation of sister chromatid segregation	84	0.361985	1.55122	0.0139911	0.164616	0.148102	1391	tags=23%, list=14%, signal=20%	208628/68014/223970/23834/70385/12235/29861/21335/12236/329152/67045/17120/67177/209334/66977/11799/68501/59126/18817
GO:0019646	GO:0019646	aerobic electron transport chain	38	0.361868	1.33275	0.0911215	0.43558	0.391883	4764	tags=84%, list=50%, signal=43%	230075/66925/66072/12858/66694/22272/66445/69702/67273/67264/67914/57320/13382/66218/22273/66152/13063/12857/68197/67003/72900/20463/66594/12859/68375/66383/67680/225887/12868/107197/227197/12864
GO:0000018	GO:0000018	regulation of DNA recombination	92	0.361481	1.57684	0.00386364	0.0842944	0.0758381	1892	tags=30%, list=20%, signal=25%	58186/21853/223970/72103/19362/66233/75317/12649/77782/226409/17688/69583/224008/12144/225182/21681/19361/11545/94232/21939/13871/59004/20174/17685/19360/27223/117599/216853
GO:1901657	GO:1901657	glycosyl compound metabolic process	39	0.360308	1.34732	0.0771028	0.410889	0.369669	1498	tags=38%, list=16%, signal=33%	209584/11605/11486/21877/66902/234309/232449/11677/11821/17766/66848/269378/21915/329504/58810
GO:0045600	GO:0045600	positive regulation of fat cell differentiation	40	0.359925	1.36095	0.0755149	0.410148	0.369002	832	tags=18%, list=9%, signal=16%	21990/19016/16000/12457/268396/12006/16956
GO:0009299	GO:0009299	mRNA transcription	44	0.358825	1.37765	0.062645	0.377825	0.339923	1186	tags=18%, list=12%, signal=16%	22259/22337/19016/24075/99730/192176/20181/20194
GO:0010212	GO:0010212	response to ionizing radiation	102	0.358554	1.60382	0.00350875	0.0806934	0.0725984	1945	tags=33%, list=20%, signal=27%	319583/623474/74041/211651/19362/12575/233805/14462/226691/224008/12144/15574/65964/22596/12018/12190/19361/100040462/16952/12189/12444/235323/12028/235559/15951/11810/68048/17685/21353/69917/13870/85305/75570/93759
GO:0051926	GO:0051926	negative regulation of calcium ion transport	42	0.358222	1.36356	0.0711009	0.400838	0.360626	208	tags=10%, list=2%, signal=9%	54652/18125/11421/12297
GO:0044773	GO:0044773	mitotic DNA damage checkpoint signaling	59	0.358046	1.44883	0.0370766	0.287015	0.258222	1480	tags=25%, list=15%, signal=22%	268465/211651/12575/12450/12649/269582/12144/15574/65964/27354/79263/66131/12189/18817/235559
GO:1901988	GO:1901988	negative regulation of cell cycle phase transition	193	0.357424	1.74954	5.27049e-05	0.0061579	0.00554014	1187	tags=21%, list=12%, signal=19%	93695/52679/208628/268465/18392/68014/21853/211651/23834/69274/70385/12575/20460/107503/12450/233805/12649/12235/67153/269582/12236/12144/15574/65964/241627/19650/225182/27354/72611/17120/67177/80285/227292/209334/79263/12190/19361/66131/66977/11799/12189
GO:0051276	GO:0051276	chromosome organization	421	0.354792	1.8817	2.24843e-10	3.76536e-07	3.38763e-07	2170	tags=36%, list=23%, signal=29%	319583/79456/208628/102920/66934/15201/71846/12447/68014/12544/223970/56742/100502766/211651/23834/70385/76915/14156/17219/72284/217716/17215/74393/17216/237911/98956/17218/320394/226409/12235/60411/54141/29861/21335/66311/17217/17865/12236/329152/18761/66578/26934/234865/12144/215387/52683/15574/22596/103733/12006/67045/59047/27354/72155/17120/105513/67177/74201/234344/12448/13433/381293/272551/…
GO:0016054	GO:0016054	organic acid catabolic process	130	0.353991	1.65902	0.00129824	0.0447071	0.0402222	1795	tags=32%, list=19%, signal=27%	11846/52815/70789/18125/319446/12040/72054/257633/67880/97212/216188/108037/245847/12896/227095/110959/229517/68133/26912/11370/20501/14245/269378/11363/12036/74091/107885/12894/16828/270076/58810/384783/52538/18242/71562/110826/20322/235674/12035/23986/19300/11652
GO:0046395	GO:0046395	carboxylic acid catabolic process	130	0.353991	1.65902	0.00129824	0.0447071	0.0402222	1795	tags=32%, list=19%, signal=27%	11846/52815/70789/18125/319446/12040/72054/257633/67880/97212/216188/108037/245847/12896/227095/110959/229517/68133/26912/11370/20501/14245/269378/11363/12036/74091/107885/12894/16828/270076/58810/384783/52538/18242/71562/110826/20322/235674/12035/23986/19300/11652
GO:2000134	GO:2000134	negative regulation of G1/S transition of mitotic cell cycle	43	0.353755	1.35239	0.0709382	0.400838	0.360626	967	tags=19%, list=10%, signal=17%	93695/52679/69274/12575/233805/19650/72611/227292
GO:0001657	GO:0001657	ureteric bud development	42	0.353188	1.3444	0.0825688	0.420768	0.378557	445	tags=12%, list=5%, signal=11%	17075/18654/21853/381157/14462
GO:0001823	GO:0001823	mesonephros development	42	0.353188	1.3444	0.0825688	0.420768	0.378557	445	tags=12%, list=5%, signal=11%	17075/18654/21853/381157/14462
GO:0072163	GO:0072163	mesonephric epithelium development	42	0.353188	1.3444	0.0825688	0.420768	0.378557	445	tags=12%, list=5%, signal=11%	17075/18654/21853/381157/14462
GO:0072164	GO:0072164	mesonephric tubule development	42	0.353188	1.3444	0.0825688	0.420768	0.378557	445	tags=12%, list=5%, signal=11%	17075/18654/21853/381157/14462
GO:0007156	GO:0007156	homophilic cell adhesion via plasma membrane adhesion molecules	35	0.353081	1.27436	0.118765	0.487503	0.438598	1153	tags=31%, list=12%, signal=28%	72333/19876/58998/58235/93842/68810/12550/19268/268902/104831/270120
GO:0044839	GO:0044839	cell cycle G2/M phase transition	113	0.351697	1.61327	0.00221412	0.0611194	0.054988	1863	tags=33%, list=19%, signal=27%	18392/12578/23834/12575/226419/107503/12450/12649/12428/67153/269582/18761/12144/15574/225182/27354/18008/381293/53869/116871/30963/79263/14235/11799/12189/18817/16906/235559/15512/18148/20133/19360/69917/108911/12566/12545/67052
GO:0046209	GO:0046209	nitric oxide metabolic process	54	0.349961	1.40889	0.0516921	0.350483	0.315323	2228	tags=39%, list=23%, signal=30%	18125/77777/12491/13857/11605/74682/16000/21926/217203/14991/11629/11898/109754/26420/20751/11652/16452/16176/18984/106759/16423
GO:0043279	GO:0043279	response to alkaloid	41	0.347754	1.31317	0.0963303	0.445972	0.401233	1414	tags=29%, list=15%, signal=25%	18125/54377/11486/52076/224008/26557/12144/11444/19361/21817/11545/26556
GO:0000959	GO:0000959	mitochondrial RNA metabolic process	40	0.347217	1.3129	0.100686	0.454083	0.40853	1595	tags=32%, list=17%, signal=27%	70560/224805/21379/216151/56282/69577/71984/353172/107885/224481/545725/71989/226153
GO:1905954	GO:1905954	positive regulation of lipid localization	62	0.346737	1.41666	0.0411583	0.307707	0.276839	2222	tags=42%, list=23%, signal=32%	22259/20750/19016/11425/11520/12491/67484/20288/53322/11307/16956/12266/66494/14081/69076/66905/68767/26420/11303/12306/93759/16176/69573/56489/27403/433256
GO:0048144	GO:0048144	fibroblast proliferation	94	0.346614	1.51449	0.00812413	0.117994	0.106157	1231	tags=20%, list=13%, signal=18%	319583/19016/23834/108961/12575/110606/54635/16000/12428/18595/67153/18477/27354/13649/78912/106298/14534/54124/18590
GO:0034502	GO:0034502	protein localization to chromosome	79	0.345743	1.47898	0.0124947	0.154942	0.139398	2168	tags=38%, list=23%, signal=30%	208628/68014/70385/12236/224008/76464/105513/67177/83815/71567/12190/18817/217449/12462/20174/17685/69917/108911/21454/12466/67052/216853/67849/68845/105377/12461/12615/12465/14056/22137
GO:0045786	GO:0045786	negative regulation of cell cycle	273	0.345613	1.76249	4.39288e-06	0.00110349	0.00099279	1187	tags=22%, list=12%, signal=20%	93695/52679/79456/208628/20112/268465/18392/240843/68014/21853/100502766/211651/12578/23834/108961/69274/70385/12575/20460/107503/12450/233805/12649/21926/14462/68729/12235/214901/67153/269582/12580/12236/12144/15574/65964/241627/19650/225182/27354/72611/17120/67177/80285/12449/217011/13649/17245/227292/209334/79263/14534/12190/19361/66131/105782/66977/68953/11799/12399/12189
GO:2001057	GO:2001057	reactive nitrogen species metabolic process	55	0.345197	1.38964	0.059633	0.368978	0.331962	2228	tags=38%, list=23%, signal=30%	18125/77777/12491/13857/11605/74682/16000/21926/217203/14991/11629/11898/109754/26420/20751/11652/16452/16176/18984/106759/16423
GO:0010833	GO:0010833	telomere maintenance via telomere lengthening	60	0.344608	1.39508	0.0386998	0.296384	0.266651	2120	tags=35%, list=22%, signal=27%	98956/18761/22596/59047/234344/52530/74108/19361/11545/140917/12462/51812/12387/19360/21454/12466/214627/216853/26400/12461/12465
GO:0030301	GO:0030301	cholesterol transport	59	0.343831	1.39131	0.0588235	0.367337	0.330486	767	tags=17%, list=8%, signal=16%	22259/19016/12491/11812/99031/244152/67484/20288/52014/11307
GO:0042273	GO:0042273	ribosomal large subunit biogenesis	57	0.343813	1.39024	0.0559284	0.361496	0.325231	2943	tags=42%, list=31%, signal=29%	72284/107071/100038991/56095/217011/67832/69237/66596/68017/18148/67236/11837/67920/57741/67115/66282/67025/19989/110954/12181/68193/268449/110109/68083
GO:0032465	GO:0032465	regulation of cytokinesis	65	0.342864	1.41353	0.0435031	0.319438	0.287393	1391	tags=25%, list=14%, signal=21%	52679/23834/108961/74393/66196/67455/26934/67903/225326/240641/381293/53869/12190/11799/19348/18817
GO:2001021	GO:2001021	negative regulation of response to DNA damage stimulus	55	0.341572	1.37505	0.059633	0.368978	0.331962	2093	tags=33%, list=22%, signal=26%	74041/223970/69885/226419/75317/77782/53380/75736/12505/94232/69076/12122/14897/13870/27223/117599/93759/50883
GO:0051783	GO:0051783	regulation of nuclear division	91	0.340794	1.48866	0.0096018	0.1315	0.118308	2170	tags=33%, list=23%, signal=26%	208628/20112/68014/70385/19362/16000/17345/12649/21926/12235/12236/103733/240641/17120/67177/209334/66977/11799/68501/18817/20399/71943/67052/229841/16176/54369/16319/18413/22137/108907
GO:0031016	GO:0031016	pancreas development	40	0.340665	1.28813	0.121281	0.492116	0.442747	607	tags=15%, list=6%, signal=14%	225631/109901/74025/19378/16000/17932
GO:0019362	GO:0019362	pyridine nucleotide metabolic process	49	0.339978	1.32859	0.0771028	0.410889	0.369669	3094	tags=49%, list=32%, signal=33%	70789/74080/12457/67880/216188/225994/67834/16498/16828/50493/192185/17448/22059/14381/110208/15926/19895/107029/110639/56717/246703/54683/59027/66171
GO:0007059	GO:0007059	chromosome segregation	321	0.338938	1.76644	7.04773e-07	0.000364097	0.000327571	2093	tags=33%, list=22%, signal=27%	208628/268465/66934/71846/12316/58186/12447/68014/223970/56742/100502766/211651/23834/70385/76915/20460/217716/74393/237911/17345/219072/320394/12235/60411/214901/54141/29861/21335/66311/17865/12236/329152/16571/66578/26934/215387/67037/52683/76464/103733/67045/72155/17120/105513/67177/74201/83815/12448/381293/68549/53869/209334/68298/19384/69912/66617/12190/66140/105988/225898/28135/66977/192176…
GO:0098742	GO:0098742	cell-cell adhesion via plasma-membrane adhesion molecules	88	0.338854	1.47094	0.0272835	0.234312	0.210806	1153	tags=26%, list=12%, signal=23%	12737/17075/23964/72333/13640/19876/58998/74762/58235/22329/93842/16852/68810/219228/12550/16408/20312/19268/116701/13052/268902/104831/270120
GO:2000059	GO:2000059	negative regulation of ubiquitin-dependent protein catabolic process	42	0.337977	1.2865	0.12156	0.492116	0.442747	2324	tags=33%, list=24%, signal=25%	72330/12578/24069/67903/79263/223870/68833/68135/20115/19164/65019/52033/67025/224727
GO:0015918	GO:0015918	sterol transport	62	0.336869	1.37634	0.0581656	0.365556	0.328884	767	tags=16%, list=8%, signal=15%	22259/19016/12491/11812/99031/244152/67484/20288/52014/11307
GO:0098813	GO:0098813	nuclear chromosome segregation	245	0.336388	1.69587	2.84653e-05	0.00397249	0.00357397	2170	tags=34%, list=23%, signal=27%	208628/268465/66934/71846/12316/12447/68014/223970/56742/100502766/211651/23834/70385/76915/217716/74393/237911/12235/60411/54141/29861/21335/17865/12236/329152/16571/26934/215387/52683/76464/103733/67045/17120/105513/67177/74201/83815/12448/381293/68549/53869/209334/68298/19384/12190/105988/225898/28135/66977/192176/68953/11799/69928/68501/59126/228421/18817/71878/77053/13494/70099/217449/223921…
GO:1902807	GO:1902807	negative regulation of cell cycle G1/S phase transition	48	0.335919	1.30721	0.103926	0.462042	0.415691	967	tags=17%, list=10%, signal=15%	93695/52679/69274/12575/233805/19650/72611/227292
GO:0006809	GO:0006809	nitric oxide biosynthetic process	51	0.334847	1.32555	0.0825688	0.420768	0.378557	1205	tags=24%, list=13%, signal=21%	18125/77777/12491/13857/11605/74682/16000/21926/14991/11629/11898/109754
GO:0080164	GO:0080164	regulation of nitric oxide metabolic process	48	0.334236	1.30066	0.103926	0.462042	0.415691	1143	tags=23%, list=12%, signal=20%	77777/12491/13857/11605/74682/16000/21926/217203/14991/11629/11898
GO:0042255	GO:0042255	ribosome assembly	55	0.334037	1.34472	0.0779817	0.411455	0.370179	2761	tags=45%, list=29%, signal=33%	50529/22596/217011/67832/68017/74778/12261/118451/67941/11837/110816/16785/20103/234384/20104/67025/20044/218629/75617/110954/12181/20085/68193/20054/268449
GO:0007088	GO:0007088	regulation of mitotic nuclear division	79	0.333574	1.42692	0.0211945	0.200346	0.180248	2170	tags=34%, list=23%, signal=27%	208628/68014/70385/16000/17345/12649/21926/12235/12236/103733/240641/17120/67177/209334/66977/11799/68501/18817/20399/71943/67052/229841/16176/54369/16319/22137/108907
GO:0042274	GO:0042274	ribosomal small subunit biogenesis	64	0.329934	1.35635	0.0568182	0.36348	0.327016	2834	tags=42%, list=29%, signal=30%	57315/98956/50529/22596/67045/69499/223499/224823/68966/13871/353258/18148/74778/67941/20115/110816/16785/20103/66467/20104/20055/20044/75617/20085/20054/217995/20068
GO:0006278	GO:0006278	RNA-templated DNA biosynthetic process	49	0.328792	1.28487	0.119159	0.487503	0.438598	2120	tags=33%, list=22%, signal=26%	98956/18761/22596/59047/52530/74108/12462/12387/19360/21454/12466/214627/216853/26400/12461/12465
GO:0007004	GO:0007004	telomere maintenance via telomerase	49	0.328792	1.28487	0.119159	0.487503	0.438598	2120	tags=33%, list=22%, signal=26%	98956/18761/22596/59047/52530/74108/12462/12387/19360/21454/12466/214627/216853/26400/12461/12465
GO:0042770	GO:0042770	signal transduction in response to DNA damage	136	0.32847	1.55024	0.00423626	0.0880849	0.0792484	1945	tags=27%, list=20%, signal=22%	52679/268465/15248/211651/12578/12575/226419/12450/12649/67153/269582/12144/15574/65964/241627/53380/27354/80285/79263/12190/19361/14235/66131/12189/12505/235323/18817/235559/18148/66143/69076/17685/226591/12122/27223/67941/93759
GO:0046496	GO:0046496	nicotinamide nucleotide metabolic process	48	0.328158	1.27701	0.122402	0.492584	0.443169	3094	tags=48%, list=32%, signal=33%	70789/74080/12457/67880/216188/67834/16498/16828/50493/192185/17448/22059/14381/110208/15926/19895/107029/110639/56717/246703/54683/59027/66171
GO:0006281	GO:0006281	DNA repair	419	0.327453	1.73437	1.49106e-07	0.000149821	0.000134791	1972	tags=29%, list=21%, signal=24%	72749/319583/79456/18973/208836/268465/623474/14087/58186/12544/21853/223970/110749/69885/72103/211651/19362/18140/66233/14156/75317/17219/80905/231642/217716/17215/17216/237911/12649/77782/69596/234258/17218/240087/226409/17688/29861/67153/212377/67484/17217/269582/224008/12144/69263/15574/24075/22596/225182/68026/12006/18971/17314/59047/27354/80285/26909/272551/104884/320209/218973/18538/18968/…
GO:0072089	GO:0072089	stem cell proliferation	64	0.325509	1.33816	0.0704545	0.399227	0.359177	1444	tags=23%, list=15%, signal=20%	17075/319583/11421/12447/17345/12393/12580/22596/12006/18008/12190/14235/230126/13871/52335
GO:0002040	GO:0002040	sprouting angiogenesis	67	0.324784	1.34865	0.0640732	0.381403	0.343141	652	tags=16%, list=7%, signal=15%	18654/52679/19876/108961/26427/242705/20358/20349/13836/18710/57342
GO:0019915	GO:0019915	lipid storage	57	0.323637	1.30866	0.0961969	0.445972	0.401233	879	tags=19%, list=9%, signal=18%	22259/17294/19016/11425/11520/12491/21926/20288/11307/16956/12266
GO:0009201	GO:0009201	ribonucleoside triphosphate biosynthetic process	77	0.321902	1.3622	0.03968	0.30037	0.270238	2725	tags=36%, list=28%, signal=26%	52815/50799/22245/230075/18103/80914/66925/11545/66046/66401/68055/18102/66108/51797/28080/67942/433182/54369/66414/54405/68073/11951/67273/23917/23918/66916/67264/11946
GO:0031023	GO:0031023	microtubule organizing center organization	111	0.320903	1.46098	0.0198386	0.193532	0.174117	2087	tags=38%, list=22%, signal=30%	100502766/20460/107503/233064/216846/98956/12649/219072/68729/277939/68026/207792/12449/232944/93737/17245/17475/209334/381644/14534/12190/28135/68953/12189/20873/20501/18817/66296/18148/69871/230376/225745/16328/76478/12387/12566/76816/67052/93759/219103/26425/234852
GO:0008630	GO:0008630	intrinsic apoptotic signaling pathway in response to DNA damage	87	0.320783	1.38653	0.0452852	0.325018	0.292413	2149	tags=32%, list=22%, signal=25%	27280/15248/74041/12575/21926/13836/17688/64113/12018/12190/75736/12189/12505/235323/12028/15951/329679/59004/69076/68048/17685/12122/67941/93759/12045/50883/56489/64704
GO:0000077	GO:0000077	DNA damage checkpoint signaling	92	0.32075	1.39916	0.0335967	0.269202	0.242196	1899	tags=27%, list=20%, signal=22%	268465/211651/12575/12450/12649/67153/269582/12144/15574/65964/241627/27354/80285/79263/12190/19361/66131/12189/235323/18817/235559/17685/226591/27223/67941
GO:0015718	GO:0015718	monocarboxylic acid transport	61	0.320464	1.30597	0.0977273	0.449206	0.404142	2379	tags=41%, list=25%, signal=31%	11770/11421/19016/11520/12491/68039/21926/16592/26457/330064/16952/69309/20501/76408/14081/384783/26420/19300/11652/16176/433256/11666/11816/20524/12140
GO:0001763	GO:0001763	morphogenesis of a branching structure	112	0.319584	1.466	0.0136884	0.162578	0.146268	1271	tags=23%, list=13%, signal=20%	18654/22337/15234/21853/71751/20733/17387/381157/16000/21926/20349/13836/18109/18595/12550/11835/66725/18163/67784/18844/16202/21817/57764/20181/18590/12505
GO:0030879	GO:0030879	mammary gland development	73	0.319465	1.33481	0.0634146	0.380196	0.342055	519	tags=12%, list=5%, signal=12%	21990/22337/404710/19876/12578/16000/14462/13836/11835
GO:0034644	GO:0034644	cellular response to UV	68	0.319313	1.32972	0.0787037	0.414039	0.372503	1960	tags=32%, list=20%, signal=26%	26415/74041/12575/80905/76293/12649/17390/65964/12018/18971/15587/18538/11545/235323/12028/18148/20174/69076/26420/13870/93759/57741
GO:0071466	GO:0071466	cellular response to xenobiotic stimulus	51	0.318123	1.25934	0.119266	0.487545	0.438635	2281	tags=35%, list=24%, signal=27%	225884/18125/27384/14862/12144/18538/57344/22223/11622/14081/235674/67768/17220/11632/16176/14923/14873/110147
GO:0006626	GO:0006626	protein targeting to mitochondrion	54	0.316362	1.27363	0.107865	0.469277	0.4222	2673	tags=39%, list=28%, signal=28%	12578/17714/17713/66725/66865/67952/67713/12122/381038/66541/11632/21855/53600/30055/30059/30058/69934/56330/69923/26926/29810
GO:0090068	GO:0090068	positive regulation of cell cycle process	180	0.315289	1.53156	0.00257059	0.0671839	0.0604441	2170	tags=33%, list=23%, signal=26%	52679/18392/58186/23834/108961/19362/226419/20460/14156/16000/74393/20135/21926/54141/26934/215387/52683/67903/65964/240641/17120/67177/381293/68549/13649/53869/116871/209334/68298/11629/16952/11799/20873/12444/68501/53317/16906/71878/15512/18148/69871/70099/20399/76044/20133/108911/12545/67052/229841/67849/105377/14211/16176/54392/319195/16319/219103/50883/14056/108907
GO:0072073	GO:0072073	kidney epithelium development	58	0.315082	1.27008	0.108352	0.469277	0.4222	543	tags=12%, list=6%, signal=11%	17075/18654/19126/21853/381157/14462/12705
GO:0033044	GO:0033044	regulation of chromosome organization	206	0.314946	1.56077	0.000723949	0.0308393	0.0277456	2120	tags=31%, list=22%, signal=25%	319583/79456/208628/68014/223970/23834/70385/14156/17216/98956/12235/29861/21335/12236/329152/18761/215387/22596/12006/67045/59047/27354/17120/67177/234344/13433/68549/218973/209334/68298/74108/66977/11799/11545/68501/59126/18817/75764/70099/217449/12462/20174/21973/51812/16905/12387/19360/69917/21454/13870/12566/12466/239122/67052/214627/229841/67849/105377/14211/26400/54392/16319/12461/12465
GO:0140053	GO:0140053	mitochondrial gene expression	142	0.314564	1.49028	0.00563582	0.0976357	0.087841	2405	tags=40%, list=25%, signal=31%	70560/76563/224805/94254/21379/50529/67036/67212/56412/94065/216151/228019/27393/66419/68611/66047/108037/56282/106338/69577/121022/71984/211253/107733/353172/107885/67840/65111/224481/68537/27395/545725/71989/18100/66230/226153/68565/94062/18120/66407/12261/64659/94064/27397/67681/118451/233870/59054/14548/353242/57312/68735/234384/67270/107734/229487/66077
GO:0048145	GO:0048145	regulation of fibroblast proliferation	79	0.313259	1.34002	0.036155	0.284917	0.256335	522	tags=13%, list=5%, signal=12%	319583/19016/23834/12575/110606/54635/16000/12428/18595/67153
GO:0061138	GO:0061138	morphogenesis of a branching epithelium	100	0.312178	1.38617	0.0286444	0.241458	0.217236	1271	tags=23%, list=13%, signal=20%	18654/22337/15234/21853/20733/17387/381157/16000/21926/20349/13836/18109/18595/12550/11835/67784/18844/16202/21817/57764/20181/18590/12505
GO:0006304	GO:0006304	DNA modification	59	0.310165	1.25508	0.124434	0.496552	0.446738	1219	tags=22%, list=13%, signal=19%	15201/56802/22715/231642/68190/14462/218214/66578/17314/13433/15384/12189/11545
GO:0070301	GO:0070301	cellular response to hydrogen peroxide	62	0.308184	1.25914	0.11991	0.489296	0.440211	1251	tags=21%, list=13%, signal=18%	26415/15234/12578/13857/26362/13804/56532/22658/66725/11677/14297/16952/68992
GO:0072332	GO:0072332	intrinsic apoptotic signaling pathway by p53 class mediator	69	0.307898	1.2829	0.0988235	0.450766	0.405546	1945	tags=32%, list=20%, signal=26%	27280/12575/242705/245527/226691/106298/12190/75736/28135/100040462/67211/12505/235323/12028/15951/69076/68048/17685/15254/67941/20115/93759
GO:0000280	GO:0000280	nuclear division	287	0.30725	1.57269	0.000210719	0.0153428	0.0138036	2170	tags=32%, list=23%, signal=26%	208628/20112/268465/623474/14087/66934/71846/17864/12316/12447/68014/56742/100502766/211651/70385/19362/76915/217716/16000/74393/237911/17345/12649/21926/12235/60411/214901/54141/17865/12236/26934/215387/52683/103733/240641/64707/17120/105513/67177/74201/12448/381293/68549/53869/209334/68298/19384/12190/19361/105988/225898/28135/66977/192176/68953/11799/69928/68501/228421/18817/235559/15512/77053…
GO:0006364	GO:0006364	rRNA processing	174	0.306304	1.48068	0.00632687	0.101448	0.0912708	2606	tags=36%, list=27%, signal=26%	72614/107094/12578/57315/107071/98956/72171/67045/100038991/234344/56095/103136/67832/69237/68533/70683/18150/52530/106338/67390/69499/68017/54364/72344/223499/52705/20227/224823/74097/68966/13871/57316/17089/224481/18148/71989/67936/74778/67973/225348/195434/214627/20115/68845/67920/110816/69713/67115/66583/66467/217109/20104/67025/20055/27998/117109/19989/20044/75617/12181/20085/71151
GO:0006754	GO:0006754	ATP biosynthetic process	65	0.306186	1.26231	0.111111	0.474679	0.42706	2923	tags=34%, list=30%, signal=24%	52815/50799/230075/66925/11545/66046/66401/68055/66108/28080/67942/433182/66414/54405/68073/11951/67273/66916/67264/11946/18746/57423
GO:0009411	GO:0009411	response to UV	115	0.30577	1.40388	0.0220226	0.205272	0.184679	1696	tags=27%, list=18%, signal=22%	26415/58186/74041/12575/80905/76293/233805/12649/226409/17688/17390/15574/65964/68026/12018/18971/15587/18538/13649/22209/12190/66131/11545/235323/13871/12028/18148/20174/69076/17685/26420
GO:0000070	GO:0000070	mitotic sister chromatid segregation	157	0.304385	1.45887	0.00814966	0.117994	0.106157	2170	tags=33%, list=23%, signal=26%	208628/66934/68014/56742/100502766/70385/74393/12235/60411/54141/17865/12236/26934/215387/52683/103733/17120/105513/67177/74201/381293/53869/209334/68298/19384/105988/225898/66977/192176/68953/11799/68501/228421/18817/13494/70099/223921/76044/13589/67052/229841/67849/105377/14211/54392/233406/16319/234852/50883/110033/22137/108907
GO:0044282	GO:0044282	small molecule catabolic process	189	0.302658	1.47963	0.00363951	0.0819951	0.0737695	2341	tags=38%, list=24%, signal=29%	11846/52815/70789/18125/319446/12040/72054/257633/11486/114663/67880/232449/97212/216188/319625/108037/245847/12896/227095/109857/110959/57357/229517/68133/26912/11370/17766/20501/11532/14245/269378/109801/14430/11363/12036/74091/107885/12894/16828/270076/58810/384783/52538/18242/71562/110826/13885/20322/66194/235674/12035/23986/19300/212111/11652/50880/433182/14635/93747/53893/14433/56690/71891/…
GO:0034614	GO:0034614	cellular response to reactive oxygen species	93	0.302606	1.32218	0.0796385	0.416341	0.374574	1251	tags=23%, list=13%, signal=20%	26415/15234/12578/12491/13857/26362/18595/13804/17390/56532/18477/22658/66725/11677/14528/13649/14297/13361/16952/11545/68992
GO:0000819	GO:0000819	sister chromatid segregation	195	0.301925	1.47624	0.00550388	0.0966836	0.0869845	2170	tags=31%, list=23%, signal=25%	208628/66934/68014/223970/56742/100502766/23834/70385/74393/12235/60411/54141/29861/21335/17865/12236/329152/26934/215387/52683/103733/67045/17120/105513/67177/74201/381293/68549/53869/209334/68298/19384/105988/225898/66977/192176/68953/11799/68501/59126/228421/18817/13494/70099/223921/21973/76044/13589/67052/229841/67849/105377/14211/54392/233406/16319/234852/50883/110033/22137/108907
GO:0071478	GO:0071478	cellular response to radiation	122	0.301433	1.39442	0.0223489	0.20716	0.186378	1818	tags=30%, list=19%, signal=24%	319583/26415/74041/19362/12575/80905/76293/12649/14462/17390/226691/224008/12144/15574/65964/22596/12018/18971/15587/18538/12190/19361/100040462/12189/11545/12444/235323/12028/18148/15951/20174/69076/26420/21353/11652/13870
GO:0048754	GO:0048754	branching morphogenesis of an epithelial tube	80	0.29998	1.28256	0.0724638	0.402844	0.362431	519	tags=15%, list=5%, signal=14%	18654/22337/21853/17387/381157/16000/21926/20349/13836/18109/18595/11835
GO:0009206	GO:0009206	purine ribonucleoside triphosphate biosynthetic process	73	0.299107	1.24975	0.121951	0.49225	0.442868	2923	tags=37%, list=30%, signal=26%	52815/50799/230075/18103/66925/11545/66046/66401/68055/18102/66108/28080/67942/433182/54369/66414/54405/68073/11951/67273/23917/23918/66916/67264/11946/18746/57423
GO:0042254	GO:0042254	ribosome biogenesis	252	0.298762	1.51247	0.000670813	0.0303618	0.027316	2802	tags=38%, list=29%, signal=28%	72614/107094/101612/12578/57315/72284/107071/98956/72171/67014/50529/22596/67045/100038991/234344/56095/217011/103136/67832/69237/68533/70683/18150/52530/66596/106338/67390/19384/69499/106298/68017/54364/72344/207704/100608/223499/52705/20227/224823/74097/68966/13871/57316/17089/224481/353258/18148/71989/67936/74778/67973/225348/12261/67236/195434/118451/214627/67941/20115/11837/68845/67920/57741…
GO:1905952	GO:1905952	regulation of lipid localization	93	0.298274	1.30325	0.0870811	0.43103	0.38779	2222	tags=35%, list=23%, signal=28%	22259/20750/19016/11425/11520/12491/11812/99031/67484/20288/53322/52014/11307/16956/12266/66494/14081/384783/11813/69076/66905/68767/26420/11303/16410/11652/12306/93759/16176/69573/56489/27403/433256
GO:0016072	GO:0016072	rRNA metabolic process	198	0.29794	1.4597	0.0033336	0.0790714	0.0711391	2834	tags=38%, list=29%, signal=27%	72614/107094/12578/57315/107071/98956/72171/67045/100038991/234344/56095/103136/67832/69237/68533/70683/18150/105083/52530/106338/67390/69499/68017/54364/72344/223499/52705/20227/224823/74097/68966/13871/57316/17089/224481/64424/18148/71989/67936/74778/67973/225348/75678/195434/214627/20115/68845/67920/213550/21453/110816/69713/67115/66583/66467/21945/217109/20104/67025/20055/27998/117109/19989/2…
GO:2001252	GO:2001252	positive regulation of chromosome organization	95	0.297494	1.30397	0.0546381	0.360324	0.324177	2120	tags=36%, list=22%, signal=28%	319583/14156/18761/215387/22596/59047/27354/17120/67177/234344/13433/68549/68298/74108/68501/75764/70099/12462/20174/51812/12387/19360/69917/21454/13870/12566/12466/239122/105377/14211/26400/54392/12461/12465
GO:0051052	GO:0051052	regulation of DNA metabolic process	392	0.296562	1.55179	1.85625e-05	0.0029381	0.00264335	1969	tags=28%, list=20%, signal=23%	52679/382207/15234/58186/21853/19016/16526/223970/69885/72103/12578/108961/19362/12575/66233/75317/17219/17215/17216/68190/98956/12649/101540/268936/77782/21926/14462/12428/218214/17218/226409/17688/214901/29861/13804/17217/69583/224008/18761/66578/12144/69263/24075/22596/225182/12006/17314/59047/27354/67177/234344/69237/13433/272551/21781/15384/18538/13649/21681/74108/59001/11692/14534/19361/142…
GO:0051302	GO:0051302	regulation of cell division	109	0.296365	1.34239	0.048771	0.341261	0.307026	1391	tags=21%, list=14%, signal=18%	18654/52679/12316/23834/108961/54635/74393/66196/67455/26934/12144/67903/19650/225326/240641/381293/53869/14534/12190/11799/18590/19348/18817
GO:0065004	GO:0065004	protein-DNA complex assembly	128	0.295327	1.37671	0.0268094	0.23103	0.207853	2788	tags=41%, list=29%, signal=30%	208628/102920/15201/12544/66929/110749/101612/17216/320394/60411/66311/66578/24075/381379/72155/67177/99730/59001/19361/71902/26886/69928/66999/108671/218977/66336/64424/11622/18148/217449/107435/80509/50927/229841/27221/13486/12615/66467/53605/20892/94112/93762/69790/28077/22059/56771/67224/19822/622675/21343/217578/225895/216154
GO:0044772	GO:0044772	mitotic cell cycle phase transition	336	0.294729	1.54612	0.000136128	0.0115797	0.010418	1486	tags=22%, list=15%, signal=19%	93695/52679/208628/18973/404710/18392/12447/12322/68014/12578/23834/69274/70385/69581/12575/20460/12450/106795/233805/20135/12649/12428/14726/12235/29861/67153/21335/269582/12580/12236/329152/18761/12144/15574/24075/19650/225182/67045/27354/72611/17120/105513/67177/12449/18008/12448/381293/13685/13649/53869/116871/30963/227292/209334/79263/14235/11629/66977/380694/16952/68953/11799/12189/54124/12…
GO:0000082	GO:0000082	G1/S transition of mitotic cell cycle	168	0.292071	1.41318	0.0218094	0.204805	0.184259	967	tags=16%, list=10%, signal=15%	93695/52679/18973/404710/12447/12322/12578/69274/69581/12575/20460/106795/233805/20135/14726/29861/12580/24075/19650/225182/72611/12448/381293/13685/13649/30963/227292
GO:1901990	GO:1901990	regulation of mitotic cell cycle phase transition	254	0.291329	1.47941	0.00258091	0.0671839	0.0604441	1486	tags=22%, list=15%, signal=19%	93695/52679/208628/18392/68014/12578/23834/69274/70385/12575/20460/12450/233805/20135/12649/14726/12235/29861/67153/269582/12580/12236/329152/18761/12144/15574/19650/225182/67045/27354/72611/17120/67177/381293/13649/53869/116871/30963/227292/209334/79263/11629/66977/16952/11799/12189/12444/68501/59126/18817/53317/16906/13871/235559/15512
GO:0043280	GO:0043280	positive regulation of cysteine-type endopeptidase activity involved in apoptotic process	79	0.287658	1.23051	0.12381	0.495238	0.445557	2149	tags=29%, list=22%, signal=23%	268973/19016/19876/12578/74682/21926/227753/14062/12018/53313/66593/223870/240354/12028/26420/223453/12122/26885/16452/67941/93759/83383/64704
GO:0001889	GO:0001889	liver development	89	0.286888	1.24604	0.110294	0.472945	0.4255	1150	tags=21%, list=12%, signal=19%	52679/225631/15234/74025/12578/108961/11486/17345/21926/24075/16173/72043/246221/13649/68927/11692/14235/239719/16952
GO:0072331	GO:0072331	signal transduction by p53 class mediator	116	0.286846	1.31834	0.036672	0.285642	0.256987	1945	tags=27%, list=20%, signal=22%	27280/52679/15248/12578/12575/226419/242705/245527/226691/53380/106298/12190/14235/75736/28135/100040462/67211/12505/235323/12028/18148/15951/66143/80751/69076/68048/17685/15254/67941/20115/93759
GO:1901987	GO:1901987	regulation of cell cycle phase transition	321	0.2867	1.49419	0.000694422	0.0308393	0.0277456	1914	tags=26%, list=20%, signal=22%	93695/52679/208628/268465/18392/68014/21853/211651/12578/23834/69274/70385/12575/226419/20460/107503/12450/233805/20135/12649/14726/12235/29861/67153/269582/12580/12236/329152/18761/12144/15574/65964/241627/19650/225182/67045/27354/72611/17120/67177/80285/381293/13649/53869/116871/30963/227292/209334/79263/12190/19361/66131/11629/66977/16952/11799/12189/12444/68501/59126/235323/327762/18817/53317…
GO:0048771	GO:0048771	tissue remodeling	110	0.286348	1.29849	0.0637255	0.380686	0.342496	725	tags=15%, list=8%, signal=14%	21990/93695/22337/109901/20750/19016/12578/13717/17387/16000/26362/13836/14062/17390/16173/12018
GO:0044770	GO:0044770	cell cycle phase transition	404	0.284834	1.49737	0.000127931	0.0112759	0.0101447	1428	tags=21%, list=15%, signal=19%	93695/52679/208628/18973/268465/404710/18392/12447/12322/68014/21853/211651/12578/23834/69274/70385/69581/12575/226419/20460/107503/12450/106795/233805/20135/12649/12428/14726/12235/29861/67153/21335/269582/12580/12236/329152/18761/12144/15574/65964/24075/241627/19650/225182/67045/27354/72611/17120/105513/67177/80285/12449/18008/12448/381293/13685/13649/53869/116871/30963/227292/209334/79263/1219…
GO:0009142	GO:0009142	nucleoside triphosphate biosynthetic process	82	0.284497	1.22081	0.117506	0.486285	0.437502	2987	tags=39%, list=31%, signal=27%	52815/50799/22245/230075/18103/80914/66925/11545/66046/66401/68055/21915/18102/66108/51797/28080/67942/433182/54369/66414/54405/68073/11951/67273/23917/23918/66916/67264/11946/18746/57423/66588
GO:0000723	GO:0000723	telomere maintenance	120	0.283525	1.30757	0.0582824	0.365556	0.328884	1892	tags=28%, list=20%, signal=23%	79456/12447/72284/98956/18761/12144/15574/22596/59047/27354/234344/12448/18538/52530/74108/12190/19361/11545/68501/327762/75764/140917/12462/20174/51812/16905/12387/19360/69917/21454/13870/12466/214627/216853
GO:0061008	GO:0061008	hepaticobiliary system development	91	0.281861	1.23123	0.108108	0.469277	0.4222	1150	tags=21%, list=12%, signal=19%	52679/225631/15234/74025/12578/108961/11486/17345/21926/24075/16173/72043/246221/13649/68927/11692/14235/239719/16952
GO:0048285	GO:0048285	organelle fission	328	0.280724	1.46557	0.00115355	0.0413961	0.0372433	2170	tags=31%, list=23%, signal=25%	208628/20112/268465/623474/14087/66934/71846/70435/17864/12316/12447/68014/19016/56742/100502766/211651/70385/19362/76915/217716/16000/74393/237911/17345/12649/21926/66196/12235/60411/214901/54141/17865/12236/26934/215387/52683/103733/240641/64707/17120/105513/67177/74201/12448/381293/68549/53869/209334/68298/19384/12190/19361/105988/71804/225898/28135/66977/192176/68953/11799/69928/67453/68501/1…
GO:0007346	GO:0007346	regulation of mitotic cell cycle	360	0.280117	1.4672	0.000381636	0.0216976	0.0195209	1486	tags=22%, list=15%, signal=19%	93695/52679/208628/268465/18392/240843/68014/211651/12578/223723/23834/69274/70385/12575/20460/16000/12450/233805/17345/20135/12649/21926/14726/12235/29861/67153/269582/12580/12236/329152/18761/12144/15574/65964/19650/225182/103733/67045/27354/72611/240641/17120/67177/217011/381293/13685/13649/53869/116871/30963/227292/209334/79263/12190/66131/105782/11629/66977/16952/11799/12189/54124/67117/2987…
GO:0045787	GO:0045787	positive regulation of cell cycle	238	0.279539	1.40099	0.0071928	0.108845	0.097926	2093	tags=30%, list=22%, signal=24%	52679/18392/58186/56742/23834/108961/19362/226419/20460/14156/110606/16000/74393/20135/12649/21926/54141/26934/215387/52683/67903/65964/53380/240641/17120/67177/232944/381293/68549/13685/13649/53869/116871/209334/68298/12190/11629/16952/11799/12189/20873/67117/12444/68501/27053/230126/53317/16906/71878/15512/18148/69871/70099/20399/76044/20133/108911/12545/67052/229841/67849/105377/14211/16176/23…
GO:0032200	GO:0032200	telomere organization	125	0.279088	1.2963	0.0691358	0.396793	0.356987	2140	tags=31%, list=22%, signal=25%	79456/12447/72284/98956/18761/12144/15574/22596/59047/27354/234344/12448/18538/52530/74108/12190/19361/11545/68501/327762/75764/140917/12462/107435/20174/51812/16905/12387/19360/69917/21454/13870/12466/214627/216853/26400/12461/12465/14056
GO:0051301	GO:0051301	cell division	452	0.279027	1.49753	4.61493e-05	0.00565498	0.00508768	2095	tags=28%, list=22%, signal=23%	18654/319583/52679/208628/66934/15201/71846/12316/12447/68014/21853/56742/12578/23834/108961/70385/226419/54635/12450/74393/237911/216846/219072/12428/320394/66196/12235/54141/109212/21335/66311/12236/67455/74107/66578/26934/12144/215387/67037/67903/19650/225182/225326/76464/240641/17120/105513/67177/12449/232944/12448/381293/68549/93737/105083/53869/234388/68298/19384/69912/14534/12190/232539/66…
GO:0034341	GO:0034341	response to type II interferon	97	0.277511	1.22659	0.105392	0.465959	0.419215	1488	tags=25%, list=15%, signal=21%	11846/70789/19016/55932/69550/21926/227753/226421/16558/12705/20312/236573/66102/80285/14528/19332/22352/20911/12332/17472/21939/74732/22320/229898
GO:0046394	GO:0046394	carboxylic acid biosynthetic process	150	0.276655	1.31061	0.0375032	0.289871	0.260791	1713	tags=27%, list=18%, signal=22%	22259/60527/225884/70789/19378/67873/19082/257633/170439/11812/16592/14862/66902/17117/234309/26922/11677/16956/107272/26432/108037/30963/13361/11898/16952/12189/11370/27053/20250/56369/11363/12036/16828/58810/66469/11813/236539/66194/26420/12035
GO:2000779	GO:2000779	regulation of double-strand break repair	99	0.276181	1.22272	0.110294	0.472945	0.4255	1948	tags=25%, list=20%, signal=20%	21853/223970/69885/19362/66233/75317/12649/77782/29861/224008/12144/225182/17314/59047/19361/14235/11545/94232/59004/20174/14897/27223/117599/216853/105377
GO:0001822	GO:0001822	kidney development	149	0.27345	1.29657	0.0748663	0.408677	0.367679	1539	tags=23%, list=16%, signal=19%	17075/18654/19126/15201/74025/20750/11421/21853/19876/22393/381157/14462/18595/12705/234865/445007/72043/246221/66725/11677/67784/217011/16202/68927/268902/18590/12505/11746/59015/12028/11622/18263/18993/14260
GO:0044843	GO:0044843	cell cycle G1/S phase transition	183	0.273439	1.32527	0.01265	0.156152	0.140487	976	tags=16%, list=10%, signal=15%	93695/52679/18973/404710/12447/12322/12578/69274/69581/12575/20460/106795/233805/20135/12428/14726/29861/12580/24075/19650/225182/72611/12448/381293/13685/13649/30963/227292/79263
GO:0016053	GO:0016053	organic acid biosynthetic process	151	0.271835	1.29055	0.0697051	0.39705	0.357219	1713	tags=26%, list=18%, signal=22%	22259/60527/225884/70789/19378/67873/19082/257633/170439/11812/16592/14862/66902/17117/234309/26922/11677/16956/107272/26432/108037/30963/13361/11898/16952/12189/11370/27053/20250/56369/11363/12036/16828/58810/66469/11813/236539/66194/26420/12035
GO:0030198	GO:0030198	extracellular matrix organization	113	0.271108	1.2436	0.092233	0.438272	0.394305	743	tags=20%, list=8%, signal=19%	18816/74025/12818/17181/12841/13717/17388/26427/20733/17387/76293/56401/21926/18595/14726/16854/52076/12587/17390/268396/72043/320078/12006
GO:0045229	GO:0045229	external encapsulating structure organization	113	0.271108	1.2436	0.092233	0.438272	0.394305	743	tags=20%, list=8%, signal=19%	18816/74025/12818/17181/12841/13717/17388/26427/20733/17387/76293/56401/21926/18595/14726/16854/52076/12587/17390/268396/72043/320078/12006
GO:0043062	GO:0043062	extracellular structure organization	114	0.269456	1.24126	0.0992736	0.450766	0.405546	743	tags=20%, list=8%, signal=19%	18816/74025/12818/17181/12841/13717/17388/26427/20733/17387/76293/56401/21926/18595/14726/16854/52076/12587/17390/268396/72043/320078/12006
GO:0009165	GO:0009165	nucleotide biosynthetic process	169	0.266185	1.28881	0.0561239	0.361496	0.325231	2408	tags=33%, list=25%, signal=25%	52815/70789/18125/74080/320685/236900/234730/11486/20135/21877/22171/50799/104111/11512/246730/22245/230075/225994/18103/80914/66925/11821/11545/66046/66401/328099/68055/353172/106564/21915/18102/270076/14081/66108/51797/20133/28080/67942/192185/110074/85305/433182/54369/66414/22247/54405/56690/14923/433256/67054/11565/68073/11951/67273/23917
GO:1901293	GO:1901293	nucleoside phosphate biosynthetic process	169	0.266185	1.28881	0.0561239	0.361496	0.325231	2408	tags=33%, list=25%, signal=25%	52815/70789/18125/74080/320685/236900/234730/11486/20135/21877/22171/50799/104111/11512/246730/22245/230075/225994/18103/80914/66925/11821/11545/66046/66401/328099/68055/353172/106564/21915/18102/270076/14081/66108/51797/20133/28080/67942/192185/110074/85305/433182/54369/66414/22247/54405/56690/14923/433256/67054/11565/68073/11951/67273/23917
GO:0072001	GO:0072001	renal system development	155	0.26415	1.26097	0.0752688	0.409254	0.368198	1539	tags=23%, list=16%, signal=19%	17075/18654/19126/15201/74025/20750/11421/21853/19876/19378/22393/381157/14462/18595/12705/234865/445007/72043/246221/66725/11677/67784/217011/16202/68927/268902/18590/12505/11746/59015/12028/11622/18263/18993/14260
GO:0071824	GO:0071824	protein-DNA complex subunit organization	146	0.264054	1.25144	0.0904393	0.434801	0.391182	1611	tags=22%, list=17%, signal=19%	208628/102920/15201/12544/66929/110749/101612/17216/320394/60411/66311/231506/66578/24075/381379/72155/67177/99730/59001/19361/71902/26886/69928/66999/108671/218977/66336/64424/11622/18148/217449/107435
GO:1902850	GO:1902850	microtubule cytoskeleton organization involved in mitosis	124	0.262195	1.21696	0.110024	0.472851	0.425415	2593	tags=36%, list=27%, signal=27%	56742/100502766/70385/20460/74393/233064/21335/17865/16571/26934/103733/105513/74201/53869/225898/66977/192176/68953/11799/26886/218977/18817/72080/13494/223921/102124/13589/67052/229841/233406/16319/219103/234852/12615/50883/108907/24063/244329/24061/71819/212514/209737/208092/20620/66165
GO:0016485	GO:0016485	protein processing	145	0.258092	1.21874	0.0997375	0.451832	0.406505	2050	tags=27%, list=21%, signal=21%	18548/18816/20112/11421/268973/208117/17387/227753/12550/232371/13024/277939/226691/225326/12018/66725/14297/245866/68876/233744/75736/100040462/12363/20194/11545/66865/16178/18453/15951/76219/17389/381038/66541/433182/110350/21367/19164/53600/69617
GO:0060271	GO:0060271	cilium assembly	169	0.256885	1.24378	0.0735695	0.404391	0.363823	1954	tags=27%, list=20%, signal=22%	213402/26942/225631/74025/27078/72421/20460/319953/74682/216846/227753/277939/106618/57342/320234/67161/81896/74201/52184/213027/83922/232944/68642/381644/245866/104831/226422/192176/20873/269702/73739/69871/21754/218232/78795/102124/54633/16328/67042/231214/76816/13589/94187/110350/19725/74117
GO:0051054	GO:0051054	positive regulation of DNA metabolic process	240	0.255397	1.2841	0.0225239	0.208213	0.187325	1998	tags=28%, list=21%, signal=22%	52679/15234/21853/72103/108961/19362/66233/101540/268936/21926/214901/29861/13804/69583/224008/18761/12144/69263/22596/225182/17314/59047/27354/67177/234344/272551/15384/18538/13649/74108/11692/19361/14235/12189/106344/11545/72151/21939/14245/327762/75764/13871/12028/18148/12462/59004/20174/11810/51812/17685/252838/12387/26398/19360/69917/21454/13870/12566/27223/12545/12466/216853/93759/105377/18…
GO:0019752	GO:0019752	carboxylic acid metabolic process	487	0.253896	1.37748	0.00142278	0.0470266	0.042309	1752	tags=24%, list=18%, signal=20%	21990/22259/11846/52815/229905/11770/60527/225884/70789/18125/319446/70560/19016/76563/12040/19378/67873/236900/19082/224805/72054/257633/16000/170439/11812/16592/14726/227659/14862/66902/26457/17117/98314/53322/234309/56360/67880/208727/246221/97212/71807/26897/26922/70266/11677/216188/16956/107272/12266/26432/14385/108037/30963/245847/13361/57344/12896/67834/227095/23874/22321/110959/110960/229…
GO:0140014	GO:0140014	mitotic nuclear division	210	0.253515	1.25747	0.0488628	0.341304	0.307065	2170	tags=30%, list=23%, signal=24%	208628/66934/68014/56742/100502766/70385/16000/74393/17345/12649/21926/12235/60411/54141/17865/12236/26934/215387/52683/103733/240641/17120/105513/67177/74201/381293/53869/209334/68298/19384/105988/225898/66977/192176/68953/11799/68501/228421/18817/13494/70099/20399/223921/71943/76044/13589/23825/72549/67052/229841/67849/105377/14211/16176/54392/54369/233406/16319/234852/50883/110033/22137/108907
GO:0010639	GO:0010639	negative regulation of organelle organization	262	0.252108	1.2815	0.0337892	0.270313	0.243196	1887	tags=27%, list=20%, signal=22%	79456/208628/20112/15234/68014/19016/100502766/100034363/70385/16000/17216/98956/12649/68729/227753/12235/69697/245886/12236/56226/53380/12018/66725/80880/27354/17120/67177/74201/52184/213027/12449/75712/17245/14297/209334/14534/65970/66977/11799/26949/12332/269702/11545/19230/67414/19241/18817/74919/66494/12631/18148/68732/52538/21754/74187/21973/69076/51812/71943/16905/12345/19360/13870/13589/1…
GO:0043436	GO:0043436	oxoacid metabolic process	491	0.252079	1.36765	0.00178506	0.0571219	0.0513915	1752	tags=23%, list=18%, signal=20%	21990/22259/11846/52815/229905/11770/60527/225884/70789/18125/319446/70560/19016/76563/12040/19378/67873/236900/19082/224805/72054/257633/16000/170439/11812/16592/14726/227659/14862/66902/26457/17117/98314/53322/234309/56360/67880/208727/246221/97212/71807/26897/26922/70266/11677/216188/16956/107272/12266/26432/14385/108037/30963/245847/13361/57344/12896/67834/227095/23874/22321/110959/110960/229…
GO:0006082	GO:0006082	organic acid metabolic process	493	0.251677	1.36439	0.00209679	0.0590261	0.0531047	1752	tags=23%, list=18%, signal=20%	21990/22259/11846/52815/229905/11770/60527/225884/70789/18125/319446/70560/19016/76563/12040/19378/67873/236900/19082/224805/72054/257633/16000/170439/11812/16592/14726/227659/14862/66902/26457/17117/98314/53322/234309/56360/67880/208727/246221/97212/71807/26897/26922/70266/11677/216188/16956/107272/12266/26432/14385/108037/30963/245847/13361/57344/12896/67834/227095/23874/22321/110959/110960/229…
GO:0048732	GO:0048732	gland development	240	0.248179	1.2478	0.0365753	0.28552	0.256877	1154	tags=18%, list=12%, signal=16%	21990/52679/22337/225631/404710/15234/109901/74025/19876/12578/108961/11486/16000/17345/21926/14462/13836/18595/12550/11835/17390/56532/24075/16173/72043/246221/17120/67784/18844/13649/68927/216233/11692/12190/14235/239719/105782/21817/57764/11821/16952/20181
GO:0140694	GO:0140694	non-membrane-bounded organelle assembly	276	0.231157	1.18111	0.0814607	0.420768	0.378557	2620	tags=38%, list=27%, signal=28%	208628/12316/100502766/20460/74393/233064/216846/219072/21926/18595/68729/227753/320394/12457/60411/54141/66311/17865/277939/268396/26934/50529/22596/72155/105513/74201/217011/67832/17245/53869/381644/14534/68017/225898/28135/50783/192176/68953/11799/26886/69928/20873/218977/18817/29806/66296/18148/69871/13494/230376/74778/217449/223921/225745/54633/68767/12261/26420/76478/12566/13589/118451/6705…
GO:0034660	GO:0034660	ncRNA metabolic process	446	0.224516	1.19908	0.0259671	0.22728	0.20448	2003	tags=24%, list=21%, signal=20%	17927/66757/17864/209584/70560/19016/72614/76563/107094/12578/102209/224805/57315/107071/210925/21357/69942/98956/74467/21926/72171/14462/11835/78697/19652/208727/74753/71807/228019/67045/57773/330959/100038991/234344/56095/69372/103136/67832/69237/68533/70683/18150/13649/105083/52530/328092/106338/74108/67390/69499/72341/23874/13716/68017/22321/239719/110960/54364/66637/71984/100087/72344/74195/…
GO:0022613	GO:0022613	ribonucleoprotein complex biogenesis	348	0.218998	1.15092	0.116809	0.485653	0.436933	2802	tags=33%, list=29%, signal=25%	72614/107094/101612/12578/57315/72284/107071/21357/98956/66405/72171/67014/50529/22596/67045/76183/67465/100038991/234344/56095/217011/27756/103136/67832/69237/68533/70683/18150/52530/66596/106338/67390/19384/69499/106298/68017/54364/50783/28035/72344/207704/100608/223499/52705/20227/224823/12729/74097/68966/13871/57316/17089/224481/353258/18148/71989/67936/74778/22258/67973/225348/20174/320632/1…
GO:0001568	GO:0001568	blood vessel development	408	-0.225613	-1.14366	0.121701	0.49225	0.442868	2400	tags=30%, list=25%, signal=23%	13819/51801/93760/13844/67154/18704/16414/22379/16477/20351/228852/15242/12168/242687/11977/18750/12702/16600/16476/19271/15531/18021/71770/20662/11909/16973/78783/58861/432940/218397/17257/226844/192187/12142/76089/14595/15368/15251/18613/13609/20866/11481/20684/21944/66515/24064/19878/19108/22433/56632/239528/93840/20807/16416/17125/14180/72461/22339/12394/13051/17131/59288/16835/11477/68545/20…
GO:0050778	GO:0050778	positive regulation of immune response	408	-0.22729	-1.15216	0.112903	0.478889	0.430847	2105	tags=24%, list=22%, signal=19%	19271/65221/268564/20910/20662/11765/54445/56480/432940/78781/109880/22042/71268/16364/14129/20852/13205/216190/18754/224860/13709/228136/171285/319817/232210/52118/54123/225471/98999/12475/22433/52065/24099/56632/140792/18806/13482/16190/234779/224938/22038/56743/21355/107321/15944/16362/14479/225888/16019/19697/170743/329260/227059/54131/210808/12229/12946/73747/66214/19294/18950/223752/414084/…
GO:0045087	GO:0045087	innate immune response	479	-0.228971	-1.17812	0.0772532	0.410889	0.369669	2093	tags=25%, list=22%, signal=20%	65221/268564/20913/20910/11765/20303/54445/56480/54473/432940/21946/78781/80876/71268/503610/16364/14129/13205/12142/216190/18754/74748/228136/17101/171285/52118/20684/16453/19106/54123/225471/69807/98999/67138/68038/12475/20306/23845/52065/15900/140792/104759/13482/234779/107527/224647/218442/13051/69091/224938/20723/22038/26412/17533/12642/21355/17084/71538/215243/26943/93694/15944/16362/14479/…
GO:0008610	GO:0008610	lipid biosynthetic process	369	-0.232483	-1.17047	0.0986547	0.450766	0.405546	1611	tags=22%, list=17%, signal=19%	56386/66612/320808/108083/192654/320951/75669/192157/56632/99010/64898/18806/74205/13121/227333/320404/57370/55981/234779/98711/218442/18708/228812/13139/241447/16835/67420/18717/67630/22038/319554/66082/12642/68059/22234/57170/54607/18805/70025/14137/67296/19224/30955/15212/170459/27399/66190/81601/233912/66294/16002/20249/230801/20452/53357/108099/208449/16007/66853/244373/23887/110911/16001/20…
GO:0005975	GO:0005975	carbohydrate metabolic process	332	-0.234803	-1.16548	0.102761	0.458092	0.412137	2548	tags=32%, list=27%, signal=24%	23827/15931/11820/11881/59031/20185/18591/54403/56421/83398/11674/19255/78830/228026/14571/18747/19204/15275/18783/53625/16969/192193/59090/77559/12398/15531/56336/11364/230101/77590/17257/26430/210973/110078/109880/17939/13807/12974/16337/270198/56790/244416/17160/14595/328572/18519/18754/12952/70974/15251/108155/16367/12421/72727/110094/56386/54371/68038/67311/74747/22619/17156/57370/14718/6896…
GO:1903829	GO:1903829	positive regulation of protein localization	351	-0.234959	-1.17332	0.0990854	0.450766	0.405546	1879	tags=21%, list=20%, signal=18%	99237/77128/328572/18754/18753/228136/28036/15251/76686/12300/18613/108155/20866/72727/66361/19878/66612/19245/329506/22433/66259/231637/11785/56294/12488/74205/77574/28240/235574/269800/22339/216274/232370/18708/12289/68667/70546/109689/22318/18642/269473/13822/14645/67943/209630/76499/235431/74006/12121/12520/16438/65973/19662/226744/53357/50754/360013/215999/17762/18479/19242/22063/13385/56406…
GO:0007420	GO:0007420	brain development	408	-0.236272	-1.19769	0.0777126	0.410889	0.369669	2252	tags=25%, list=23%, signal=20%	12568/15242/12934/12227/67269/11977/18845/320191/16485/100182/103583/15531/20662/11909/207165/193796/17537/18012/16974/17257/239857/26431/12286/11920/76089/81907/15572/99633/243743/15251/13609/16565/22253/11941/94190/67772/207615/192157/74747/233878/56632/68505/20807/22778/17125/269116/171567/13051/65100/214444/213326/76071/16658/18992/78286/223697/234593/52906/23797/22026/70839/30841/12404/23910…
GO:0070201	GO:0070201	regulation of establishment of protein localization	397	-0.239629	-1.2145	0.0589102	0.367337	0.330486	1879	tags=22%, list=20%, signal=19%	99237/15502/77128/15185/328572/18754/18753/22213/15251/12889/108155/16367/20866/72727/66753/20684/66361/19245/329506/68606/22433/66259/11785/54525/12488/74205/68889/77574/13121/28240/235574/269800/214597/216274/18708/12289/14567/68667/70546/109689/16522/52906/21844/22318/18642/207227/18575/27060/18693/14645/209630/70297/235431/18576/74006/19062/12520/16438/27414/65973/19662/226744/53357/50754/360…
GO:0030036	GO:0030036	actin cytoskeleton organization	440	-0.240379	-1.22866	0.0491329	0.342132	0.30781	1839	tags=24%, list=19%, signal=20%	328572/18754/54126/18753/20401/18613/13609/20430/78885/74569/140580/19878/69807/94190/73178/68606/50918/277360/16419/74734/231637/170731/194401/93840/12488/20807/28240/16416/235574/50884/234854/102866/60595/101497/18708/64652/319277/13631/170826/72114/12335/271981/14457/109689/666244/57778/12632/18693/100169/13822/434204/66214/232227/76499/21916/235431/69288/83767/21812/105855/19062/50876/13821/2…
GO:0051223	GO:0051223	regulation of protein transport	373	-0.240605	-1.21334	0.063893	0.381233	0.342989	1879	tags=22%, list=20%, signal=19%	99237/15502/77128/328572/18754/18753/22213/15251/12889/108155/16367/20866/72727/66753/20684/66361/329506/68606/22433/66259/11785/54525/12488/74205/68889/77574/13121/28240/235574/269800/214597/216274/18708/12289/14567/68667/70546/109689/16522/52906/21844/22318/18642/207227/18575/27060/18693/14645/209630/70297/18576/74006/19062/12520/16438/27414/65973/19662/226744/53357/50754/360013/19335/215999/16…
GO:0002831	GO:0002831	regulation of response to biotic stimulus	284	-0.241846	-1.18268	0.104777	0.464195	0.417628	1151	tags=25%, list=12%, signal=23%	11765/54445/56480/432940/78781/71268/503610/16364/13205/216190/18754/74748/228136/171285/52118/54123/225471/98999/12475/52065/140792/13482/227738/234779/224647/224938/20723/22038/21355/17084/93694/15944/16362/14479/19697/170743/80287/54131/210808/19294/223752/414084/17057/66294/230594/11501/16002/547253/108086/70408/268857/69601/56417/193740/63953/67525/12628/26365/74019/76681/384309/16145/217166…
GO:0001819	GO:0001819	positive regulation of cytokine production	297	-0.243044	-1.19235	0.0902022	0.434493	0.390905	1013	tags=15%, list=11%, signal=14%	215243/16362/19697/170743/17951/329260/54131/16194/210808/12229/66214/17196/19766/15979/18950/12520/17085/75083/230594/11501/74039/67581/12978/70408/16007/83397/193740/218832/12774/18106/384309/69165/225825/16428/11863/21940/18762/15511/236312/54698/67445/12490/12775/12501/20304
GO:0030029	GO:0030029	actin filament-based process	474	-0.243265	-1.24903	0.0279463	0.236633	0.212894	1659	tags=22%, list=17%, signal=19%	78885/74569/78618/140580/19878/69807/94190/73178/68606/50918/277360/16419/74734/231637/20266/170731/194401/93840/12488/20807/28240/16416/235574/50884/234854/102866/60595/101497/18708/12289/68339/68667/64652/319277/13631/170826/72114/12335/271981/14457/223697/109689/666244/57778/12632/16518/18693/100169/13822/434204/66214/232227/76499/21916/235431/69288/83767/21812/105855/19062/50876/13821/20416/1…
GO:1905114	GO:1905114	cell surface receptor signaling pathway involved in cell-cell signaling	300	-0.243273	-1.19664	0.0907692	0.434978	0.391342	2439	tags=30%, list=25%, signal=23%	12995/19055/68259/74996/29811/218952/70122/20405/77938/98170/12568/15242/12054/16600/103583/17342/116838/26554/16973/432940/16974/17257/71268/13205/66743/81907/219158/110891/77531/81004/77116/11426/108013/20729/80707/233328/67772/18230/231637/19277/56274/93840/68889/18099/100201/14180/21887/72961/213326/68339/11798/68667/72114/13542/21888/21844/269424/16646/235086/67943/12404/80288/13543/665113/1…
GO:0045596	GO:0045596	negative regulation of cell differentiation	376	-0.244376	-1.23147	0.0536513	0.357012	0.321197	2539	tags=32%, list=26%, signal=24%	11820/27374/15284/81702/114716/268996/18591/19055/52662/17136/27103/234069/13844/19255/107173/218952/239667/54720/20351/17966/213084/12568/19015/12168/20983/12227/15903/12054/320191/27140/18021/74498/207806/228790/16974/17257/21946/12606/76089/216190/12454/319817/83766/16453/18569/24064/79362/29869/22433/11785/223435/170731/16909/320404/210982/100201/16416/16190/17125/14180/381695/22339/12394/204…
GO:0001817	GO:0001817	regulation of cytokine production	463	-0.244665	-1.25484	0.0322325	0.261609	0.235365	1666	tags=22%, list=17%, signal=19%	16453/19106/18569/19878/54123/225471/16170/69807/68038/12475/22433/23845/15900/56632/12488/104759/16190/234779/107527/224647/12394/74155/13051/57781/18708/22163/17131/68667/232879/109689/215243/319984/16362/19697/170743/17951/329260/54131/16194/210808/12229/66214/17196/19766/15979/18950/81601/105855/12520/17085/193736/16598/75083/230594/11501/74039/67581/241311/108086/16331/17289/12978/70408/1205…
GO:0060322	GO:0060322	head development	446	-0.244728	-1.24878	0.0290641	0.244586	0.22005	2252	tags=26%, list=23%, signal=21%	12568/15242/12934/12227/67269/11977/18845/320191/16485/100182/103583/15531/20662/11909/207165/193796/17537/18012/16974/17257/239857/109880/226844/74392/26431/12286/11920/76089/81907/328572/15572/99633/243743/15251/13609/16565/22253/11941/94190/67772/207615/192157/74747/233878/56632/68505/20807/22778/17125/269116/171567/13051/65100/214444/213326/76071/16658/18992/78286/223697/234593/52906/414758/2…
GO:0001525	GO:0001525	angiogenesis	304	-0.245017	-1.20611	0.0756173	0.410259	0.369103	933	tags=23%, list=10%, signal=21%	15251/18613/13609/20866/20684/21944/24064/19878/19108/22433/239528/93840/20807/16416/17125/14180/72461/22339/12394/13051/11477/68545/20317/30955/23797/229700/14645/66214/19274/18576/21802/21812/15277/216527/16598/20416/11501/20692/13855/11852/16002/11555/14766/236511/50754/18129/69601/16007/239027/16923/14366/60611/12628/26365/13805/19242/21872/20315/54409/74769/72324/11504/353156/18191/12826/127…
GO:0031347	GO:0031347	regulation of defense response	426	-0.24513	-1.24699	0.0422741	0.314644	0.28308	2391	tags=30%, list=25%, signal=24%	11845/27103/13844/12493/19255/16396/229096/14000/106763/83945/19015/18783/71586/18858/17855/18750/12702/17079/100182/17470/65221/11765/54445/56480/432940/21946/78781/231871/12606/71268/503610/16364/14129/13205/11920/216190/14154/21934/18754/74748/228136/171285/52118/23945/18569/54123/225471/16170/98999/12475/66259/52065/140792/13482/227738/234779/107527/224647/13051/57781/11690/16835/224938/20723…
GO:0007409	GO:0007409	axonogenesis	292	-0.247702	-1.21537	0.0772798	0.410889	0.369669	2301	tags=30%, list=24%, signal=23%	239667/20351/213084/12568/12168/12934/18858/53625/18845/18750/56336/20910/78808/233489/20616/68404/109880/226251/12799/12661/12286/15185/328572/243743/20430/23945/105689/381979/22253/16572/11426/56386/19339/29869/13518/19277/11785/223435/20266/93840/20807/269116/22339/20482/14567/18717/13542/18992/53321/110532/171207/21844/54214/17196/16574/76499/19274/382253/22772/170758/18213/22084/12978/18164/…
GO:0034762	GO:0034762	regulation of transmembrane transport	305	-0.248485	-1.22153	0.0669782	0.390369	0.351208	2263	tags=29%, list=24%, signal=23%	19204/15275/12568/11977/104215/432442/18750/16485/14579/12349/20913/109676/14697/12293/69179/24012/218397/20167/109880/16337/110876/12286/16490/216190/18754/18753/20544/252972/76686/12300/16367/20866/56632/20273/20266/170731/77574/16416/234779/12289/16519/13040/12335/83997/16522/52906/22318/15165/30955/27060/16518/18693/80281/435145/19766/74011/15277/22612/11636/19062/57816/16508/11555/17258/6597…
GO:0007169	GO:0007169	transmembrane receptor protein tyrosine kinase signaling pathway	336	-0.248945	-1.23564	0.0542636	0.359183	0.323151	2198	tags=28%, list=23%, signal=22%	16818/104215/74360/18750/12702/246103/74143/19271/15531/20913/57330/20662/233410/109880/18718/16337/20852/76089/81907/19267/18753/15251/18793/108155/20430/19262/16367/215653/77531/24064/70568/19245/108083/22433/192157/74747/170731/227333/16416/14180/22339/74155/18708/56338/234593/225849/52906/414758/16010/21844/269473/67296/19697/76499/21802/83767/22612/19062/20416/13855/20661/16002/71371/18213/5…
GO:0034329	GO:0034329	cell junction assembly	249	-0.248963	-1.19965	0.113208	0.478889	0.430847	1873	tags=24%, list=19%, signal=20%	12286/76089/20401/14406/99633/18613/108155/19262/105689/11426/19878/94190/68606/13518/19277/20807/16416/269116/22339/60595/232370/18708/17131/13631/13542/53321/70546/244895/434204/76499/235431/12404/74318/14758/50791/18213/11877/243725/18164/217692/17762/18222/241638/18190/17260/21872/14270/54409/103967/16456/76965/14086/12217/236915/12695/26875/18191/14394/12741/11815
GO:0006935	GO:0006935	chemotaxis	326	-0.249911	-1.23882	0.0547945	0.360324	0.324177	1823	tags=24%, list=19%, signal=20%	18753/19252/74748/17101/243743/13609/20430/56744/105689/22253/54199/16572/98365/16170/73178/68606/20306/277360/19277/11785/223435/20266/93840/13482/28240/16416/269116/22339/13051/68667/18717/13542/68545/12642/21844/30955/16574/19274/70839/74006/238130/321019/105855/11501/22772/20301/170758/18213/53357/22084/12978/215999/16007/237847/269608/13805/12774/30957/19242/17260/20315/18600/14009/270152/23…
GO:0042330	GO:0042330	taxis	326	-0.249911	-1.23882	0.0547945	0.360324	0.324177	1823	tags=24%, list=19%, signal=20%	18753/19252/74748/17101/243743/13609/20430/56744/105689/22253/54199/16572/98365/16170/73178/68606/20306/277360/19277/11785/223435/20266/93840/13482/28240/16416/269116/22339/13051/68667/18717/13542/68545/12642/21844/30955/16574/19274/70839/74006/238130/321019/105855/11501/22772/20301/170758/18213/53357/22084/12978/215999/16007/237847/269608/13805/12774/30957/19242/17260/20315/18600/14009/270152/23…
GO:1902903	GO:1902903	regulation of supramolecular fiber organization	261	-0.250493	-1.21288	0.0918836	0.437973	0.394036	2174	tags=33%, list=23%, signal=26%	101706/16800/140810/13043/211556/67384/11820/75991/11519/14158/11845/76707/23963/218952/242687/236266/225115/246103/14159/13191/328108/230101/218397/17257/109880/13860/74392/213556/15185/328572/18754/54126/18753/20401/76686/18613/13609/20430/19878/73178/68606/50918/277360/231637/29877/170731/26419/12955/50884/56430/101497/18708/214444/16835/319277/666244/12632/18693/434204/66214/17318/76499/21916…
GO:0043254	GO:0043254	regulation of protein-containing complex assembly	303	-0.250555	-1.23311	0.0570108	0.36348	0.327016	2156	tags=26%, list=22%, signal=21%	225115/14159/13191/215351/20910/328108/78808/228361/230101/20616/68558/218397/17257/22042/13860/13205/11920/15185/328572/18754/54126/18753/108909/76686/18613/20430/19106/50907/19339/50918/277360/231637/26419/22778/12955/50884/22339/234779/56430/245000/101497/214444/381280/327959/225849/666244/15944/171543/12229/76499/21916/70839/100732/105855/50876/75083/13548/237860/17973/243725/268857/11797/696…
GO:0061564	GO:0061564	axon development	327	-0.250715	-1.24353	0.0440061	0.321347	0.28911	2301	tags=30%, list=24%, signal=24%	239667/20351/213084/12568/12168/12934/18858/53625/18845/18750/16600/16476/56336/20910/78808/233489/20616/68404/109880/226251/12799/12661/12286/15185/328572/243743/20430/23945/105689/381979/22253/16572/11426/56386/69807/19339/29869/13518/19277/11785/223435/20266/259277/93840/20807/27528/269116/22339/20482/223255/14567/18717/13542/18992/53321/110532/171207/21844/269473/54214/17196/16574/76499/19274…
GO:0000904	GO:0000904	cell morphogenesis involved in differentiation	447	-0.252426	-1.28803	0.0155705	0.172516	0.15521	2264	tags=30%, list=24%, signal=24%	213084/12568/12168/12934/18858/53625/11977/72162/18845/18750/17344/74143/56336/20910/217331/78808/74498/26554/233489/16974/20616/68404/76454/109880/226251/12799/12661/12286/76089/29859/15185/328572/15572/71900/243743/18613/20430/23945/105689/381979/22253/16572/11426/66515/19878/56386/11941/94190/19339/29869/73178/75695/12323/13518/19277/11785/223435/20266/170731/93840/20807/26419/20469/269116/223…
GO:0033674	GO:0033674	positive regulation of kinase activity	259	-0.252842	-1.22627	0.0824427	0.420768	0.378557	1014	tags=16%, list=11%, signal=15%	21844/13628/15944/30955/16194/66214/21802/100732/12520/66610/11501/13543/11555/18763/18213/17289/50754/108099/18011/12978/243725/69601/16007/26382/14366/320207/72149/16001/26365/18479/30957/17260/13385/53310/16145/16151/100504663/69068/18762/22174/17751/12775
GO:0045088	GO:0045088	regulation of innate immune response	237	-0.253148	-1.21681	0.107981	0.469277	0.4222	2052	tags=27%, list=21%, signal=21%	11765/54445/56480/432940/78781/71268/503610/16364/13205/216190/18754/74748/228136/171285/52118/54123/225471/98999/12475/52065/140792/13482/234779/224938/20723/22038/21355/93694/15944/16362/14479/19697/170743/54131/210808/19294/223752/414084/17057/66294/11501/16002/547253/70408/268857/69601/56417/193740/63953/67525/12628/26365/76681/384309/16145/217166/225825/16768/15511/236312/54698/209387/22174
GO:0006812	GO:0006812	monoatomic cation transport	467	-0.253402	-1.29983	0.0144886	0.167088	0.150326	2204	tags=33%, list=23%, signal=27%	20541/20720/232341/72821/11820/227731/320707/12725/12361/18591/54403/238871/13483/19055/30805/59049/51801/13367/18704/94249/68115/72160/67760/12568/74610/18626/11977/16818/432442/16485/108837/74143/14579/18021/109676/14697/57138/12293/69179/24012/18797/58861/56384/328133/22042/226844/14412/98396/12325/110876/12286/16490/18754/20544/18195/21452/252972/12300/227632/20866/216001/93790/110891/16453/5…
GO:1904951	GO:1904951	positive regulation of establishment of protein localization	242	-0.253686	-1.22755	0.0907692	0.434978	0.391342	1879	tags=22%, list=20%, signal=18%	99237/77128/328572/18754/18753/15251/20866/72727/66361/19245/329506/22433/66259/11785/12488/74205/77574/28240/235574/269800/216274/18708/12289/68667/70546/109689/22318/18642/14645/209630/235431/74006/12520/16438/65973/19662/226744/53357/50754/360013/215999/18479/22063/56406/56513/170770/80885/320051/16409/18762/56508/26950/11554
GO:0043410	GO:0043410	positive regulation of MAPK cascade	297	-0.254264	-1.24739	0.0497667	0.342504	0.308145	1706	tags=24%, list=18%, signal=20%	215653/12421/19106/24064/69109/19878/93834/20306/52065/56274/93840/16416/14180/22339/234779/234854/68235/66129/224938/26412/109689/234593/16010/21844/16019/17951/30955/16194/17318/19766/16706/21802/21812/321019/12520/20416/11501/13543/665113/16002/11555/18213/17948/50754/268934/18129/12978/69601/26382/83397/330938/14366/320207/16001/26365/18479/30957/17260/76681/20315/217378/21940/18762/20305/319…
GO:1903532	GO:1903532	positive regulation of secretion by cell	212	-0.254692	-1.20945	0.108192	0.469277	0.4222	2417	tags=33%, list=25%, signal=25%	68943/11845/76707/16414/18747/19204/98170/12568/19015/18783/12934/20983/20979/50790/18750/20910/11765/78808/27062/21934/328572/18754/54126/15251/56807/16367/20866/19339/66259/56632/11785/54525/170731/18806/12488/28240/16190/269800/12394/12289/68667/109689/18642/320405/14645/209630/66214/76499/74006/16438/19662/53357/360013/215999/22063/11542/56406/20315/60510/56513/20614/56216/80885/320051/18546/…
GO:0006644	GO:0006644	phospholipid metabolic process	229	-0.254792	-1.22138	0.096124	0.445972	0.401233	2481	tags=35%, list=26%, signal=27%	18707/77582/18591/219024/229791/12752/18704/210376/14731/224020/19015/18783/17855/27392/12702/13026/71910/18797/17257/77626/66569/18718/66586/78610/270084/18753/17101/77116/66612/16330/108083/192654/320951/75669/192157/56632/99010/18806/74205/227333/320404/55981/234779/218442/18708/228812/13139/16835/67420/18717/67630/22038/319554/66082/26943/54607/18805/14137/67296/30955/15212/27399/19062/234515…
GO:0051345	GO:0051345	positive regulation of hydrolase activity	351	-0.254889	-1.27284	0.0258982	0.22728	0.20448	1157	tags=25%, list=12%, signal=23%	14697/20662/20303/233489/24012/381085/218397/233046/13205/241308/76089/213990/54126/18753/20401/13196/71900/80748/13609/16403/19878/68606/18786/12323/20306/277360/26419/20469/22339/216991/170826/19765/70719/13040/544817/271981/109689/72238/21844/74206/71310/329260/227059/29809/227800/17196/232227/244668/382253/69993/241694/223752/240168/12371/226089/75083/228850/99326/13543/65973/50791/18213/1706…
GO:0051047	GO:0051047	positive regulation of secretion	221	-0.255358	-1.22057	0.0951638	0.442652	0.398246	2428	tags=33%, list=25%, signal=25%	19055/68943/11845/76707/16414/18747/19204/98170/12568/19015/18783/12934/20983/20979/50790/18750/20910/11765/78808/27062/21934/328572/18754/54126/15251/56807/16367/20866/19339/22433/66259/56632/11785/54525/170731/18806/12488/74205/28240/16190/269800/12394/12289/68667/109689/18642/320405/14645/209630/66214/76499/74006/16438/19662/53357/360013/215999/22063/11542/56406/20315/60510/56513/20614/56216/1…
GO:0031349	GO:0031349	positive regulation of defense response	273	-0.257159	-1.25138	0.0612557	0.374846	0.337242	2052	tags=26%, list=21%, signal=21%	11765/54445/56480/432940/78781/12606/71268/16364/14129/13205/216190/14154/21934/18754/228136/171285/52118/18569/54123/225471/16170/98999/12475/66259/52065/140792/13482/227738/234779/11690/16835/224938/22038/13040/15944/16362/14479/19697/170743/30955/54131/210808/12229/19294/19766/223752/414084/12520/11501/12978/70408/69601/193740/67525/207728/12774/17260/11542/76681/384309/16145/217166/225825/167…
GO:0030001	GO:0030001	metal ion transport	423	-0.259736	-1.31937	0.00942712	0.131196	0.118035	2479	tags=33%, list=26%, signal=26%	12361/18591/54403/238871/13483/19055/30805/59049/51801/13367/18704/94249/68115/72160/67760/12568/74610/18626/11977/16818/432442/16485/108837/74143/14579/18021/109676/14697/57138/12293/69179/24012/18797/58861/56384/328133/22042/226844/14412/98396/12325/110876/12286/16490/18754/20544/18195/21452/252972/12300/227632/20866/216001/93790/110891/16453/53376/16170/11941/12323/20515/68427/56632/20273/6697…
GO:0010817	GO:0010817	regulation of hormone levels	260	-0.259966	-1.25965	0.058104	0.365556	0.328884	1873	tags=24%, list=19%, signal=20%	12286/13350/18754/12952/54126/15251/12889/16367/20866/11481/19339/66259/54525/170731/18549/20887/28240/214597/54381/98711/12394/12289/68667/109689/16522/21844/22318/18642/207227/18575/27060/18693/14645/12229/18576/16438/16002/19662/53357/101476/215999/14366/16001/22063/11542/17423/56406/60510/114679/16531/20614/230857/13618/80885/30953/217166/11863/15483/22139/26875/56508/26950/20304
GO:0030155	GO:0030155	regulation of cell adhesion	483	-0.260081	-1.334	0.00527142	0.0956087	0.0860174	1831	tags=22%, list=19%, signal=19%	18754/18753/19252/171285/243743/18793/13609/319817/19262/83766/16403/16453/77976/11426/54371/68606/50918/22433/277360/24099/74734/18806/20807/13482/320404/16416/16190/22339/107527/60595/12394/18708/234847/17131/67694/94214/233405/70546/244895/107321/54607/16362/19697/83796/16194/66214/17196/76499/235431/18576/18950/70839/81601/269023/105855/12520/57816/67155/14758/11501/16002/11555/14766/50791/18…
GO:0002460	GO:0002460	adaptive immune response based on somatic recombination of immune receptors built from immunoglobulin superfamily domains	198	-0.260352	-1.22334	0.113671	0.479978	0.431827	1946	tags=26%, list=20%, signal=21%	22042/16364/14129/20852/18753/17101/171285/319817/232210/52118/18987/16453/54123/24099/13482/16190/22339/17131/60504/68667/20723/21355/16362/225888/16019/27060/329260/16194/12229/12946/73747/19294/18950/105855/12520/17085/16331/12053/15007/12628/17260/74048/15042/15001/225825/12986/18762/15002/12775/12458/16197
GO:0046486	GO:0046486	glycerolipid metabolic process	225	-0.261125	-1.24839	0.0729814	0.403365	0.3629	2481	tags=36%, list=26%, signal=28%	18707/77582/18591/219024/12752/30805/18704/210376/14731/224020/18783/50790/27392/12702/13026/18797/17257/231871/77626/66569/18718/66586/78610/270084/13350/72108/23945/81004/77116/16330/108083/192654/320951/75669/192157/99010/64898/18806/74205/16890/227333/320404/55981/234779/218442/18708/228812/13139/16835/67420/18717/22038/66082/26943/54607/18805/67296/30955/27399/81601/19062/234515/20249/230801…
GO:0009611	GO:0009611	response to wounding	281	-0.261631	-1.27872	0.0382848	0.293653	0.264195	1848	tags=25%, list=19%, signal=21%	14595/15368/18754/18753/17101/15251/18793/80748/18613/56744/11426/19339/22433/13518/54525/259277/93840/20807/16416/27528/72461/22339/234779/223255/18027/18717/192232/233405/12495/269473/16194/76499/12193/70839/12476/19296/11555/20512/381232/20511/18213/17289/18129/16007/237847/16923/16001/12628/26365/18479/17312/20597/14811/13805/30957/19242/54368/74769/270152/16456/381792/74145/243958/19128/2657…
GO:0045089	GO:0045089	positive regulation of innate immune response	189	-0.261649	-1.21878	0.115625	0.484172	0.435601	2139	tags=27%, list=22%, signal=21%	17079/65221/11765/54445/56480/432940/78781/71268/16364/13205/216190/18754/228136/171285/52118/54123/225471/98999/12475/52065/140792/13482/234779/224938/22038/15944/16362/14479/19697/170743/54131/210808/19294/223752/414084/11501/70408/69601/193740/67525/76681/384309/16145/217166/225825/16768/15511/236312/54698/209387/22174
GO:0002697	GO:0002697	regulation of immune effector process	240	-0.262128	-1.26159	0.0609375	0.374267	0.336721	2362	tags=31%, list=25%, signal=24%	14158/53331/13844/12493/16414/19204/15275/72162/14159/19271/268564/20910/11765/21946/22042/14129/20852/216190/15368/74748/171285/319817/232210/52118/16453/225471/22433/56632/18806/13482/16190/234779/13051/22163/17131/68667/20723/21355/93694/16362/225888/16019/170743/329260/210808/12229/12946/73747/19294/18950/105855/12520/17057/16002/19662/360013/12053/15007/63953/12628/26365/11542/74048/18106/15…
GO:0009914	GO:0009914	hormone transport	199	-0.262372	-1.23438	0.101072	0.454094	0.40854	1856	tags=24%, list=19%, signal=20%	13350/18754/12952/54126/15251/12889/16367/20866/11481/19339/66259/54525/170731/28240/214597/12394/12289/68667/109689/16522/21844/22318/18642/207227/18575/27060/18693/14645/12229/18576/16438/19662/53357/215999/14366/22063/11542/56406/60510/114679/20614/80885/217166/22139/26875/56508/26950/20304
GO:0018212	GO:0018212	peptidyl-tyrosine modification	187	-0.262491	-1.22176	0.113003	0.478889	0.430847	982	tags=33%, list=10%, signal=30%	18591/21937/14158/13844/19255/16414/106522/106763/15275/16818/18750/12702/14159/19271/233410/218397/19258/16337/12747/18754/18753/18613/16453/233328/67742/16416/22339/234779/74155/11477/225849/16362/67296/195018/16019/16194/12229/21802/22612/12520/66610/13543/16002/547253/13548/50754/18011/12978/12519/16923/16001/11302/74019/13385/53310/16195/260299/18762/22370/12501/20304
GO:0032103	GO:0032103	positive regulation of response to external stimulus	349	-0.263296	-1.31476	0.0124294	0.154942	0.139398	2052	tags=27%, list=21%, signal=22%	11765/54445/56480/432940/78781/109880/227541/12606/71268/16364/14129/13205/216190/14154/21934/18754/228136/171285/13609/52118/18569/54123/225471/16170/98999/12475/73178/68606/20306/66259/52065/140792/13482/227738/22339/234779/13051/223255/11690/16835/224938/22038/13040/17084/21844/15944/16362/14479/19697/170743/30955/54131/210808/12229/19294/19766/70839/223752/74006/414084/105855/12520/11501/1821…
GO:0002694	GO:0002694	regulation of leukocyte activation	400	-0.263444	-1.33718	0.00884336	0.125506	0.112915	2394	tags=30%, list=25%, signal=24%	14158/329559/234069/93760/13844/12493/19255/320940/16414/16396/14000/106763/11534/19204/83945/18783/207952/16818/14159/17470/268564/16478/20910/20662/11765/228361/330817/21946/109880/320484/22042/12606/20852/12142/11920/19267/15368/74748/17101/171285/319817/232210/83766/16453/225471/16170/22433/52065/24099/74734/56632/67742/18806/13482/320404/16190/107527/12394/22163/17131/16835/224938/22038/7214…
GO:0051648	GO:0051648	vesicle localization	171	-0.263886	-1.21493	0.11875	0.487503	0.438598	2660	tags=33%, list=28%, signal=25%	116733/211556/107371/75964/17281/20964/16561/77038/12752/76707/20336/12568/66226/12934/20983/67898/64933/13191/103583/26554/233489/20616/17257/27204/102058/108012/16572/50907/20965/108030/227648/19339/73178/20615/26419/60595/210998/14533/233405/26412/52906/75914/30955/27060/16574/76499/67581/50791/77097/103967/13426/16151/76510/12217/18762/26875/13429
GO:0048871	GO:0048871	multicellular organismal-level homeostasis	481	-0.264338	-1.35597	0.00327101	0.0782549	0.0704045	1403	tags=19%, list=15%, signal=17%	16909/20807/320404/28240/100201/22778/16416/16190/72461/17761/22339/216274/13051/67013/21887/20482/227120/22163/67561/11798/17764/170826/16658/13040/66082/11655/14055/19224/232791/27060/23797/320405/12229/17196/27399/224671/321019/105855/19062/67155/16598/11501/105171/67017/11555/14766/14605/19662/20249/16331/208638/170758/17289/231633/12978/12053/56417/193740/16923/16001/12628/11932/26365/319653…
GO:0002252	GO:0002252	immune effector process	377	-0.264364	-1.33352	0.0130046	0.158924	0.142981	2394	tags=31%, list=25%, signal=24%	14158/27103/53331/13844/12493/16414/20351/19204/15275/69188/11977/17305/72162/17079/14159/19271/268564/20910/11765/54445/93685/20619/21946/22042/54519/16364/14129/20852/216190/15368/18754/18753/224860/74748/17101/171285/319817/232210/101142/52118/18987/16453/98365/54123/225471/22433/15900/12890/56632/18806/13482/16190/16431/234779/13051/22163/17131/60504/68667/20723/16848/56743/21355/22318/93694/…
GO:0051046	GO:0051046	regulation of secretion	397	-0.264745	-1.34179	0.00608429	0.100977	0.0908471	2479	tags=33%, list=26%, signal=26%	12361/16181/21937/19055/68943/14158/11845/76707/16414/75597/18747/67760/20394/19204/98170/12568/19015/18783/12934/20983/20979/50790/18750/59090/14159/17470/20913/116838/20910/11765/78808/20619/16973/27062/109880/26431/12286/16490/15368/21934/328572/18754/12952/54126/18195/15251/12889/56807/16367/20866/19339/22433/20615/66259/12890/56632/11785/54525/170731/18806/12488/74205/13121/28240/16190/26980…
GO:0031503	GO:0031503	protein-containing complex localization	164	-0.264957	-1.21264	0.119685	0.48886	0.439818	2090	tags=27%, list=22%, signal=21%	268566/71770/20619/252875/20853/11920/19290/12889/12300/108155/77531/16572/26414/94190/231452/73178/20615/16416/171567/17131/67694/18717/22318/18693/16574/232227/241694/76789/228850/665113/108086/50791/245666/18164/18222/74019/13385/103967/20614/56216/18762/18191/56508/23969
GO:0010720	GO:0010720	positive regulation of cell development	345	-0.265163	-1.32143	0.0138399	0.163577	0.147167	2388	tags=31%, list=25%, signal=24%	17136/329559/234069/93760/13844/320940/213084/12168/207952/16818/72162/18845/18750/17344/14159/16476/74143/12349/268564/228361/233489/20616/17257/76454/109880/328572/243743/15251/20430/19262/83766/11426/66515/69807/22433/12323/74734/170731/20807/26419/13121/320404/100201/22778/16416/16190/22339/13047/107527/12394/13051/20482/56381/75302/17131/14567/13631/170826/72147/20317/21844/16362/19697/83796…
GO:0055082	GO:0055082	intracellular chemical homeostasis	400	-0.265385	-1.34703	0.0078668	0.115497	0.10391	2437	tags=30%, list=25%, signal=23%	12752/238871/19055/240174/13367/94249/68115/75597/18747/15275/12568/19015/64209/11977/16818/236266/18750/108837/107368/12349/20913/109676/57138/22019/16973/18797/18012/56384/328133/22042/225912/98396/99237/12286/15368/72844/18754/74748/20544/71900/15251/108155/20866/216001/110891/66612/11941/22433/20615/17134/66259/68427/66972/170731/28240/100201/16416/235574/214597/234779/18708/12289/68667/10910…
GO:0050801	GO:0050801	monoatomic ion homeostasis	336	-0.265539	-1.318	0.0209914	0.200346	0.180248	2210	tags=34%, list=23%, signal=27%	116873/217893/17869/233571/21391/94229/329178/20541/232341/23959/11820/320707/54403/12752/238871/13819/59049/240174/13367/94249/68115/12568/64209/11977/16818/18750/16485/108837/107368/242960/12349/109676/57138/233489/18797/56384/328133/22042/225912/98396/99237/12286/15368/72844/18754/14151/74748/20544/71900/15251/20866/216001/110891/11941/20615/17134/66259/68427/66972/108943/170731/28240/100201/1…
GO:0009306	GO:0009306	protein secretion	250	-0.266147	-1.28579	0.0451713	0.324665	0.292095	2253	tags=28%, list=23%, signal=22%	98170/19015/20983/50790/59090/17470/20913/116838/11765/78808/16973/18012/13350/328572/67510/18754/17101/15251/12889/16367/20866/11481/50907/19339/66259/11785/54525/12488/13121/28240/269800/214597/12289/68667/109689/16522/52906/21844/18642/207227/18575/27060/18693/14645/209630/18576/74006/12404/16438/27414/19662/53357/360013/215999/16897/76483/22063/56406/60510/56513/72825/20614/13618/80885/320051…
GO:0035592	GO:0035592	establishment of protein localization to extracellular region	250	-0.266147	-1.28579	0.0451713	0.324665	0.292095	2253	tags=28%, list=23%, signal=22%	98170/19015/20983/50790/59090/17470/20913/116838/11765/78808/16973/18012/13350/328572/67510/18754/17101/15251/12889/16367/20866/11481/50907/19339/66259/11785/54525/12488/13121/28240/269800/214597/12289/68667/109689/16522/52906/21844/18642/207227/18575/27060/18693/14645/209630/18576/74006/12404/16438/27414/19662/53357/360013/215999/16897/76483/22063/56406/60510/56513/72825/20614/13618/80885/320051…
GO:0006873	GO:0006873	intracellular monoatomic ion homeostasis	291	-0.266372	-1.30751	0.0164316	0.179072	0.161108	2210	tags=27%, list=23%, signal=22%	64209/11977/16818/18750/108837/107368/12349/109676/57138/18797/56384/328133/22042/225912/98396/99237/12286/15368/72844/18754/74748/20544/71900/15251/20866/216001/110891/11941/20615/17134/68427/66972/170731/28240/100201/16416/235574/234779/109108/94178/64051/68027/12335/27060/227059/210808/15212/21871/74011/76775/57816/234515/16438/20512/65973/16439/11306/215999/11931/11932/20393/12774/22063/12307…
GO:0051222	GO:0051222	positive regulation of protein transport	227	-0.266591	-1.27294	0.0640625	0.381403	0.343141	1879	tags=22%, list=20%, signal=19%	99237/77128/328572/18754/18753/15251/20866/72727/66361/329506/22433/66259/11785/12488/74205/77574/28240/235574/269800/216274/18708/12289/68667/70546/109689/22318/18642/14645/209630/74006/12520/16438/65973/19662/226744/53357/50754/360013/215999/18479/22063/56406/56513/170770/80885/320051/16409/18762/56508/26950/11554
GO:0009100	GO:0009100	glycoprotein metabolic process	218	-0.266592	-1.27309	0.0630769	0.379974	0.341856	2573	tags=31%, list=27%, signal=23%	194388/15931/11881/59031/208211/56321/20446/26433/51801/83398/19015/53625/11977/192193/15531/56336/330217/74498/224143/233824/217119/16337/244745/14595/328572/15251/108155/72727/269181/16453/239528/93840/17156/20454/16431/66789/94214/17308/13010/68059/57170/15212/12229/140481/207958/101351/99011/170789/97884/381510/60322/20452/218271/66967/14537/76483/20441/20444/12499/17423/68304/52463/171212/17…
GO:0071692	GO:0071692	protein localization to extracellular region	252	-0.266649	-1.28825	0.0434109	0.319321	0.287287	2253	tags=29%, list=23%, signal=22%	98170/19015/20983/50790/59090/17470/20913/116838/11765/78808/16973/18012/13350/328572/67510/18754/17101/15251/12889/16367/20866/11481/50907/19339/66259/11785/54525/12488/13121/28240/269800/214597/12289/68667/109689/16522/52906/21844/18642/207227/18575/224109/27060/18693/14645/209630/18576/74006/12404/16438/27414/19662/53357/360013/215999/16897/76483/22063/56406/60510/56513/72825/20614/13618/80885…
GO:0034220	GO:0034220	monoatomic ion transmembrane transport	393	-0.266988	-1.3537	0.0117018	0.150358	0.135275	2461	tags=32%, list=26%, signal=25%	15980/54403/238871/13483/19055/68943/13844/13367/18704/94249/68115/72160/19204/15275/12568/74610/11977/16818/432442/18750/16485/108837/74143/14579/109676/14697/57138/12293/69179/24012/18797/56384/328133/14412/98396/110876/12286/16490/18754/14406/20544/21452/252972/12300/20866/216001/110891/11941/68427/56632/20273/66972/20266/77574/28240/16416/235574/234779/72961/12289/16440/68667/241296/94178/165…
GO:0042060	GO:0042060	wound healing	200	-0.267373	-1.25822	0.0751534	0.409069	0.368032	1848	tags=26%, list=19%, signal=21%	14595/15368/18754/18753/17101/15251/18793/80748/18613/56744/11426/19339/22433/13518/54525/93840/20807/16416/72461/22339/18717/192232/233405/12495/16194/76499/70839/12476/11555/17289/18129/16007/16923/12628/26365/18479/17312/20597/13805/54368/74769/270152/16456/74145/19128/26570/260299/22174/12842/12490/11554/22370
GO:0031346	GO:0031346	positive regulation of cell projection organization	304	-0.26751	-1.31683	0.0174311	0.18518	0.166603	2236	tags=29%, list=23%, signal=23%	12168/242687/11977/104215/72162/18845/17344/14159/74143/233489/16974/20616/76454/109880/227541/231225/13860/76089/328572/72844/18519/15572/71900/13803/243743/20430/208647/16403/11426/66515/73178/12323/11785/20266/170731/20807/50884/22339/13047/56430/20482/223255/18708/14567/13631/13542/234593/225849/20317/52906/21844/54214/382253/70839/21812/74006/16438/665113/50791/18213/22084/18011/17973/243725…
GO:0006954	GO:0006954	inflammatory response	411	-0.267596	-1.35747	0.00503787	0.0935591	0.0841734	2281	tags=31%, list=24%, signal=24%	106763/19204/15275/11513/19015/18783/18858/17855/18626/18750/12702/17079/12326/100182/16476/17470/15531/20303/26554/20619/54473/58861/432940/21946/231871/227541/12606/192187/14129/13205/11920/216190/14595/14154/15368/21934/74748/171285/15251/56744/23945/54199/18569/225471/16170/54371/68038/12475/18786/20306/66259/52065/104759/26419/16190/17125/72461/234779/107527/13051/57781/22163/241447/11690/16…
GO:0018108	GO:0018108	peptidyl-tyrosine phosphorylation	185	-0.268226	-1.24557	0.0944272	0.441857	0.397531	2464	tags=33%, list=26%, signal=25%	18591/21937/14158/13844/19255/16414/106522/106763/15275/16818/18750/12702/14159/19271/233410/218397/19258/16337/12747/18754/18753/18613/16453/233328/67742/16416/22339/234779/74155/11477/225849/16362/67296/195018/16019/16194/12229/21802/22612/12520/66610/13543/16002/547253/13548/50754/18011/12978/12519/16923/16001/11302/74019/13385/53310/16195/260299/18762/22370/12501/20304
GO:0042110	GO:0042110	T cell activation	378	-0.269939	-1.36196	0.00532621	0.0957111	0.0861095	992	tags=14%, list=10%, signal=13%	54607/16362/22780/27060/83796/16205/16194/12193/18950/81601/233912/269023/321019/105855/12520/17085/67155/12476/11501/16002/22084/12053/17973/12519/268857/16923/229473/63953/26365/74048/18106/20315/94212/16195/270152/15001/69165/16428/16768/21940/16409/18762/15002/54698/16008/20555/50932/12775/72310/12501/12458/16197/20304
GO:0009101	GO:0009101	glycoprotein biosynthetic process	180	-0.269991	-1.24823	0.0859375	0.428886	0.38586	2508	tags=29%, list=26%, signal=22%	59031/208211/56321/20446/26433/51801/83398/53625/11977/15531/56336/330217/74498/224143/233824/217119/16337/244745/14595/328572/108155/72727/269181/16453/239528/93840/20454/16431/66789/17308/68059/57170/207958/101351/99011/170789/97884/381510/60322/20452/218271/14537/76483/20441/20444/12499/17423/68304/52463/171212/17751/12775/54613
GO:0050865	GO:0050865	regulation of cell activation	436	-0.270133	-1.37823	0.00315367	0.0769128	0.069197	2394	tags=31%, list=25%, signal=25%	14158/329559/234069/93760/13844/12493/19255/320940/16414/16396/14000/106763/11534/19204/83945/21682/18783/207952/16818/18750/14159/17470/19271/268564/16478/20910/20662/11765/228361/330817/21946/109880/320484/22042/12606/20852/12142/11920/13350/19267/15368/18753/74748/17101/171285/319817/232210/83766/16453/225471/16170/22433/52065/24099/74734/56632/20111/67742/18806/13482/320404/16190/107527/12394…
GO:0051249	GO:0051249	regulation of lymphocyte activation	336	-0.270196	-1.34112	0.0133372	0.160885	0.144745	992	tags=15%, list=10%, signal=14%	54607/16362/225888/22780/16019/83796/227059/12229/73747/12193/18950/81601/269023/321019/105855/12520/67155/11501/16002/74039/16331/17289/22084/12978/12053/17973/12519/16923/229473/63953/26365/17260/74048/18106/94212/16195/243958/15001/69165/16768/21940/18762/15002/54698/22174/16008/20555/12775/12501/16197/20304
GO:0044262	GO:0044262	cellular carbohydrate metabolic process	165	-0.270234	-1.23748	0.106918	0.468462	0.421467	2374	tags=33%, list=25%, signal=25%	83398/19255/78830/228026/18747/19204/15275/18783/53625/59090/77559/12398/15531/56336/11364/17257/110078/109880/16337/56790/244416/14595/328572/18519/18754/12952/15251/108155/16367/12421/110094/74747/14718/68961/26357/212032/16010/18642/75805/27399/15277/19062/17425/58200/66294/16002/108099/17423/18106/16195/217166/320706/15483/11554
GO:0019725	GO:0019725	cellular homeostasis	465	-0.270369	-1.38532	0.00195152	0.0583598	0.0525052	2359	tags=29%, list=25%, signal=23%	13367/11674/94249/68115/75597/18747/15275/12568/19015/64209/74610/11977/16818/236266/18750/108837/13191/107368/12349/20913/109676/57138/228361/22019/16973/18797/18012/56384/328133/22042/225912/98396/99237/12286/15368/72844/18754/74748/20544/71900/15251/108155/20866/216001/110891/66612/11941/69807/18786/22433/20615/17134/66259/68427/66972/170731/20807/28240/100201/16416/235574/214597/234779/112406…
GO:0055080	GO:0055080	monoatomic cation homeostasis	332	-0.271108	-1.34569	0.0129645	0.158863	0.142926	2210	tags=27%, list=23%, signal=22%	64209/11977/16818/18750/16485/108837/107368/242960/12349/109676/57138/233489/18797/56384/328133/22042/225912/98396/99237/12286/15368/72844/18754/14151/74748/20544/71900/15251/20866/216001/110891/11941/20615/17134/66259/68427/66972/108943/170731/28240/100201/16416/235574/234779/109108/94178/64051/68027/12335/107723/27060/227059/210808/15212/21871/83704/224671/74011/76775/57816/234515/16438/20512/6…
GO:0042886	GO:0042886	amide transport	218	-0.271145	-1.29483	0.0492308	0.342132	0.30781	2329	tags=31%, list=24%, signal=24%	75597/78830/18747/67760/19015/12934/20983/50790/59090/65221/12349/20913/116838/20910/16973/18012/13350/18754/54126/15251/12889/16367/20866/11481/19339/69906/66259/54525/28240/214597/26357/72961/12289/68667/231999/56325/109689/16522/21355/21844/18642/207227/18575/27060/18693/14645/27416/18576/16438/20512/19662/20511/53357/215999/18830/18479/22063/56406/319924/60510/20614/217166/26570/26875/56508/1…
GO:0032990	GO:0032990	cell part morphogenesis	478	-0.271818	-1.39654	0.00160636	0.0517331	0.0465433	2264	tags=30%, list=24%, signal=24%	213084/12568/12168/242687/12934/18858/20983/53625/11977/20979/72162/18845/18750/17344/74143/56336/116838/20910/78808/74498/233489/20616/68404/17257/76454/109880/226251/12799/20403/12661/12286/72759/76089/29859/81907/15185/328572/15572/71900/243743/20430/23945/105689/381979/22253/16572/11426/66515/19878/56386/19339/29869/73178/18786/12323/13518/19277/11785/223435/20266/170731/259277/93840/20807/26…
GO:0030003	GO:0030003	intracellular monoatomic cation homeostasis	286	-0.274144	-1.33922	0.0116774	0.150358	0.135275	2210	tags=28%, list=23%, signal=22%	64209/11977/16818/18750/108837/107368/12349/109676/57138/18797/56384/328133/22042/225912/98396/99237/12286/15368/72844/18754/74748/20544/71900/15251/20866/216001/110891/11941/20615/17134/68427/66972/170731/28240/100201/16416/235574/234779/109108/94178/64051/68027/12335/27060/227059/210808/15212/21871/74011/76775/57816/234515/16438/20512/65973/16439/11306/215999/11931/11932/20393/12774/22063/12307…
GO:0098655	GO:0098655	monoatomic cation transmembrane transport	344	-0.274401	-1.37038	0.00503745	0.0935591	0.0841734	2204	tags=29%, list=23%, signal=23%	74610/11977/16818/432442/16485/108837/74143/14579/109676/14697/57138/12293/69179/24012/18797/56384/328133/14412/98396/110876/12286/16490/18754/20544/21452/252972/12300/20866/216001/110891/11941/68427/56632/20273/66972/20266/28240/16416/235574/234779/72961/12289/16440/68667/94178/16519/13040/12335/83997/16522/52150/107723/22318/15165/30955/27060/16518/18693/227059/21871/27416/83704/70839/57816/164…
GO:0010975	GO:0010975	regulation of neuron projection development	379	-0.274866	-1.38697	0.0053734	0.0957303	0.0861268	2301	tags=30%, list=24%, signal=23%	239667/20351/213084/12568/12168/12934/18858/72162/18845/17344/14159/16600/74143/74498/233489/13427/16974/20616/76454/109880/227541/12325/12286/76089/328572/18519/15572/71900/13803/243743/20430/208647/16403/105689/381979/11426/66515/244418/29869/12323/20615/277360/11785/20266/56294/170731/259277/20807/22339/13047/56430/20482/223255/14567/13631/13542/18992/234593/225849/20317/52906/171207/140500/21…
GO:0098660	GO:0098660	inorganic ion transmembrane transport	360	-0.275104	-1.38054	0.00787952	0.115497	0.10391	2204	tags=29%, list=23%, signal=23%	74610/11977/16818/432442/16485/108837/74143/14579/109676/14697/57138/12293/69179/24012/18797/56384/328133/14412/98396/110876/12286/16490/18754/14406/20544/21452/252972/12300/20866/216001/110891/11941/20515/68427/56632/20273/66972/20266/28240/16416/235574/234779/72961/12289/16440/68667/241296/94178/16519/12335/83997/16522/52150/107723/22318/15165/30955/27060/16518/18693/227059/21871/27416/83704/70…
GO:0098662	GO:0098662	inorganic cation transmembrane transport	340	-0.275353	-1.37166	0.00487601	0.0926885	0.0833901	2204	tags=29%, list=23%, signal=23%	74610/11977/16818/432442/16485/108837/74143/14579/109676/14697/57138/12293/69179/24012/18797/56384/328133/14412/98396/110876/12286/16490/18754/20544/21452/252972/12300/20866/216001/110891/11941/68427/56632/20273/66972/20266/28240/16416/235574/234779/72961/12289/16440/68667/94178/16519/12335/83997/16522/52150/107723/22318/15165/30955/27060/16518/18693/227059/21871/27416/83704/70839/57816/16438/165…
GO:1903530	GO:1903530	regulation of secretion by cell	381	-0.275392	-1.39196	0.00504529	0.0935591	0.0841734	2497	tags=34%, list=26%, signal=26%	26921/12361/16181/21937/19055/68943/14158/11845/76707/16414/75597/18747/67760/20394/19204/98170/12568/19015/18783/12934/20983/20979/50790/18750/59090/14159/17470/20913/116838/20910/11765/78808/20619/16973/27062/109880/26431/12286/16490/15368/21934/328572/18754/12952/54126/18195/15251/12889/56807/16367/20866/19339/20615/66259/12890/56632/11785/54525/170731/18806/12488/13121/28240/16190/269800/2145…
GO:0007626	GO:0007626	locomotory behavior	153	-0.275907	-1.24909	0.102073	0.455837	0.410108	1971	tags=24%, list=21%, signal=20%	17257/12799/13860/12661/12286/18754/15572/98685/72108/53376/26414/11941/233878/20273/13482/78286/15212/229599/18574/21916/224671/105171/16508/11906/14366/17762/14811/80297/12307/13385/20315/319924/16531/20614/57754/98660/12298
GO:0001667	GO:0001667	ameboidal-type cell migration	264	-0.277454	-1.34611	0.01933	0.192407	0.173105	2587	tags=36%, list=27%, signal=27%	12927/14389/20541/21961/74030/67384/11881/26921/18707/21813/18591/12752/72446/14158/11845/76707/18704/245827/16414/229096/20351/19015/12168/242687/18858/56218/18750/16600/16476/109333/16973/16974/17257/109880/216190/15368/15185/18754/20401/15251/18613/16367/20684/11426/19878/19245/68606/239528/20807/13482/16416/72461/50884/22339/234779/60595/11477/20317/171207/107321/30955/23797/100169/14645/6621…
GO:2000147	GO:2000147	positive regulation of cell motility	357	-0.277462	-1.39088	0.00508053	0.0935591	0.0841734	1889	tags=25%, list=20%, signal=21%	16337/11920/76089/15368/15185/18754/14894/15251/18613/13609/16367/16403/24064/70568/19878/69807/68606/50918/18786/22433/20306/277360/231637/239528/18806/26419/66922/16416/14180/22339/234779/60595/13051/18708/11477/223697/21844/11980/18805/30955/23797/232227/76499/70839/21812/74006/238130/67179/105855/12476/11501/20692/11852/16002/12339/18213/22084/12978/237860/215999/69601/16007/11855/67374/83397…
GO:0040017	GO:0040017	positive regulation of locomotion	363	-0.277771	-1.39352	0.0055356	0.0969019	0.0871808	1889	tags=26%, list=20%, signal=21%	16337/11920/76089/15368/15185/18754/14894/15251/18613/13609/16367/16403/24064/70568/19878/16170/69807/73178/68606/50918/18786/22433/20306/277360/231637/239528/18806/26419/66922/16416/14180/22339/234779/60595/13051/18708/11477/223697/21844/11980/18805/30955/23797/232227/76499/70839/21812/74006/238130/67179/105855/12476/11501/20692/11852/16002/12339/18213/22084/12978/237860/215999/69601/16007/11855…
GO:0048858	GO:0048858	cell projection morphogenesis	460	-0.277812	-1.42425	0.000957756	0.0356427	0.0320671	2264	tags=31%, list=24%, signal=25%	213084/12568/12168/242687/12934/18858/20983/53625/11977/20979/72162/18845/18750/17344/74143/56336/116838/20910/78808/74498/233489/20616/68404/17257/76454/109880/226251/12799/20403/12661/12286/76089/29859/81907/15185/328572/15572/71900/243743/20430/23945/105689/381979/22253/16572/11426/66515/19878/56386/19339/29869/73178/18786/12323/13518/19277/11785/223435/20266/170731/259277/93840/20807/26419/16…
GO:0048667	GO:0048667	cell morphogenesis involved in neuron differentiation	400	-0.277823	-1.41016	0.00205486	0.0590261	0.0531047	2301	tags=32%, list=24%, signal=25%	239667/20351/213084/12568/12168/12934/18858/53625/11977/72162/18845/18750/17344/74143/56336/20910/217331/78808/74498/233489/20616/68404/76454/109880/226251/12799/12661/12286/76089/29859/15185/328572/15572/71900/243743/20430/23945/105689/381979/22253/16572/11426/66515/19878/56386/11941/94190/19339/29869/73178/12323/13518/19277/11785/223435/20266/170731/93840/20807/26419/269116/22339/13047/20482/14…
GO:0045785	GO:0045785	positive regulation of cell adhesion	314	-0.278221	-1.37246	0.00759205	0.113182	0.101828	1570	tags=19%, list=16%, signal=17%	54371/68606/50918/22433/277360/24099/74734/18806/13482/320404/16416/16190/22339/107527/12394/17131/67694/94214/16362/19697/83796/16194/18950/70839/81601/105855/12520/67155/11501/16002/14766/170758/22084/12053/17973/12519/11906/16007/14537/63953/26365/12774/19242/74048/21872/18106/20315/16195/16456/15001/69165/330662/21940/18762/15002/16008/12775/22370/12501/16197/20304
GO:0010631	GO:0010631	epithelial cell migration	188	-0.278333	-1.29474	0.06875	0.396793	0.356987	2557	tags=36%, list=27%, signal=27%	74030/11881/26921/18707/21813/18591/12752/11845/76707/18704/245827/16414/20351/19015/12168/56218/18750/16600/16476/109333/17257/15368/15185/18754/20401/15251/18613/16367/20684/11426/19878/19245/68606/20807/13482/16416/72461/22339/234779/60595/20317/107321/30955/23797/14645/66214/232227/76499/19274/21812/11501/20692/11852/16002/12339/50754/69601/11855/63953/26365/269608/17260/20315/74769/330662/13…
GO:0090130	GO:0090130	tissue migration	188	-0.278333	-1.29474	0.06875	0.396793	0.356987	2557	tags=36%, list=27%, signal=27%	74030/11881/26921/18707/21813/18591/12752/11845/76707/18704/245827/16414/20351/19015/12168/56218/18750/16600/16476/109333/17257/15368/15185/18754/20401/15251/18613/16367/20684/11426/19878/19245/68606/20807/13482/16416/72461/22339/234779/60595/20317/107321/30955/23797/14645/66214/232227/76499/19274/21812/11501/20692/11852/16002/12339/50754/69601/11855/63953/26365/269608/17260/20315/74769/330662/13…
GO:0090132	GO:0090132	epithelium migration	188	-0.278333	-1.29474	0.06875	0.396793	0.356987	2557	tags=36%, list=27%, signal=27%	74030/11881/26921/18707/21813/18591/12752/11845/76707/18704/245827/16414/20351/19015/12168/56218/18750/16600/16476/109333/17257/15368/15185/18754/20401/15251/18613/16367/20684/11426/19878/19245/68606/20807/13482/16416/72461/22339/234779/60595/20317/107321/30955/23797/14645/66214/232227/76499/19274/21812/11501/20692/11852/16002/12339/50754/69601/11855/63953/26365/269608/17260/20315/74769/330662/13…
GO:0006816	GO:0006816	calcium ion transport	227	-0.278873	-1.33159	0.0171815	0.18518	0.166603	2126	tags=31%, list=22%, signal=25%	108837/74143/14579/18021/109676/14697/12293/69179/18797/58861/56384/12325/12286/18754/20544/252972/12300/20866/216001/110891/16453/53376/16170/11941/12323/56632/66972/28240/16416/235574/234779/12289/16440/68667/94178/12335/319984/30955/213573/269999/70839/74006/19062/16438/11555/65973/18763/18018/16439/53357/215999/11931/14811/12774/22063/18823/20315/54409/54368/170770/57340/78506/13618/18796/698…
GO:0060560	GO:0060560	developmental growth involved in morphogenesis	179	-0.278992	-1.29023	0.0642633	0.382082	0.343752	2632	tags=34%, list=27%, signal=25%	13043/93960/59024/71955/11820/21813/17136/27103/239667/20351/213084/12568/12168/12934/20983/20979/116838/233489/16974/68404/17257/20403/81907/15185/328572/243743/13609/20430/23945/11426/24064/29869/18786/93840/20807/22339/98711/14567/13542/171207/21844/54214/76499/382253/83767/18213/12978/17762/18479/12774/20980/20315/58198/330914/17984/319740/18762/26456/20404/116837/17751
GO:0010721	GO:0010721	negative regulation of cell development	171	-0.279051	-1.28475	0.071875	0.402423	0.362052	2428	tags=32%, list=25%, signal=24%	19055/17136/13844/19255/107173/239667/20351/213084/12568/20983/12227/320191/74498/17257/21946/12606/76089/216190/319817/16453/29869/170731/16190/22339/12394/18708/17131/14567/16835/16658/68027/72147/171207/93694/16362/17196/269023/234515/16331/18213/50754/22084/12053/229473/63953/668253/26365/12774/19242/18725/13618/217166/16768/26456/17751
GO:1903131	GO:1903131	mononuclear cell differentiation	343	-0.279238	-1.39386	0.00475603	0.0926885	0.0833901	2385	tags=31%, list=25%, signal=24%	18030/234069/93760/19255/320940/14000/20351/83945/15242/207952/56218/11977/16818/16969/17305/14159/12326/16476/19271/268564/18021/20662/11909/228361/93685/21946/109880/16364/227525/20852/12142/11920/328572/224860/74748/319817/381319/101142/83766/18987/16453/98365/22433/277360/24099/15900/74734/20807/13482/320404/28240/22778/16190/16431/22339/234779/107527/12394/18708/17131/16658/16848/72147/16362…
GO:0015833	GO:0015833	peptide transport	171	-0.279706	-1.28776	0.06875	0.396793	0.356987	2175	tags=29%, list=23%, signal=23%	50790/59090/65221/12349/20913/116838/16973/18012/13350/18754/54126/15251/12889/16367/20866/11481/19339/66259/54525/28240/214597/12289/68667/56325/109689/16522/21355/21844/18642/207227/18575/27060/18693/14645/18576/16438/19662/53357/215999/22063/56406/60510/20614/217166/26570/26875/56508/26950/20304
GO:0050708	GO:0050708	regulation of protein secretion	191	-0.279872	-1.30637	0.0559006	0.361496	0.325231	1498	tags=21%, list=16%, signal=18%	66259/11785/54525/12488/13121/28240/269800/214597/12289/68667/109689/16522/52906/21844/18642/207227/18575/27060/18693/14645/209630/18576/74006/16438/27414/19662/53357/360013/215999/16897/22063/56406/60510/56513/80885/320051/217166/56508/26950/11554/20304
GO:0120039	GO:0120039	plasma membrane bounded cell projection morphogenesis	455	-0.280295	-1.43397	0.000636102	0.029659	0.0266837	2264	tags=31%, list=24%, signal=25%	213084/12568/12168/242687/12934/18858/20983/53625/11977/20979/72162/18845/18750/17344/74143/56336/116838/20910/78808/74498/233489/20616/68404/17257/76454/109880/226251/12799/20403/12661/12286/76089/29859/81907/15185/328572/15572/71900/243743/20430/23945/105689/381979/22253/16572/11426/66515/19878/56386/19339/29869/73178/18786/12323/13518/19277/11785/223435/20266/170731/259277/93840/20807/26419/26…
GO:0010506	GO:0010506	regulation of autophagy	199	-0.281831	-1.32593	0.042879	0.317286	0.285457	2638	tags=31%, list=27%, signal=23%	77040/67588/13043/76561/50868/17281/67773/12752/68943/67154/18704/107173/209131/210376/67846/50505/228361/67412/56480/18718/78610/11920/15368/15185/225131/252972/15251/320311/52187/12421/66612/69807/108083/29869/22433/75669/140742/227738/15944/74374/171543/81601/74006/223649/17425/83669/11555/54636/170625/50754/22084/17762/76681/100855/16145/16151/100502698/100504663/320706/209387/17751/13179
GO:0098771	GO:0098771	inorganic ion homeostasis	293	-0.282046	-1.38334	0.00709743	0.108381	0.0975088	2437	tags=32%, list=25%, signal=24%	12752/238871/13819/59049/240174/13367/94249/68115/12568/64209/11977/16818/18750/16485/108837/107368/242960/109676/57138/233489/18797/56384/328133/22042/225912/98396/12286/15368/72844/18754/14151/20544/15251/20866/216001/110891/11941/66259/68427/66972/108943/170731/28240/100201/16416/235574/234779/72961/109108/94178/64051/68027/12335/107723/27060/227059/15212/21871/83704/224671/74011/76775/57816/2…
GO:0040013	GO:0040013	negative regulation of locomotion	203	-0.282285	-1.33367	0.0410959	0.307699	0.276831	1402	tags=20%, list=15%, signal=18%	20807/77574/13482/13051/57781/223255/64652/234593/269003/20317/66082/110532/171207/380916/66214/76499/19274/105171/11852/14766/50791/69601/63953/114886/11932/13805/12774/19242/17260/11542/14270/20315/18600/260315/52463/353156/319430/26456/12741/13179/11815
GO:0010038	GO:0010038	response to metal ion	170	-0.282498	-1.29821	0.0661417	0.388024	0.349098	2628	tags=38%, list=27%, signal=28%	18013/13605/12368/232341/11820/59125/19055/78830/16477/11513/18783/20983/11977/16818/20979/67898/16485/16476/268566/16478/18021/17257/109880/22042/12606/98396/15368/328572/233908/20866/70568/12323/66972/54525/26419/320404/28240/234779/16440/11690/14567/54153/17764/94178/22038/12335/80976/17025/18575/15165/27060/17258/65973/18164/17762/20597/14811/17260/22063/13385/20980/60510/58802/16531/17751
GO:1905475	GO:1905475	regulation of protein localization to membrane	138	-0.283307	-1.2538	0.100329	0.45304	0.407592	2439	tags=34%, list=25%, signal=26%	12995/12752/13483/11845/53331/13844/106522/12568/104215/102193/71770/233489/12325/228136/12889/76686/12300/108155/12323/231637/56294/74205/77574/235574/18708/14567/230235/70546/67943/76499/19062/12520/66610/665113/233977/50791/226744/245666/18479/18222/19242/13385/170770/26570/16409/18762/56508
GO:0043491	GO:0043491	protein kinase B signaling	125	-0.283433	-1.22962	0.117253	0.485653	0.436933	789	tags=16%, list=8%, signal=15%	70839/21812/19062/234515/11501/16002/50791/18213/17289/22084/101476/16923/16001/13805/20315/75778/74769/22174/17751/20304
GO:0030335	GO:0030335	positive regulation of cell migration	350	-0.283694	-1.41613	0.00181453	0.0576976	0.0519095	1889	tags=25%, list=20%, signal=21%	16337/11920/76089/15368/15185/18754/15251/18613/13609/16367/16403/24064/70568/19878/69807/68606/50918/18786/22433/20306/277360/231637/239528/18806/26419/66922/16416/14180/22339/234779/60595/13051/18708/11477/223697/21844/11980/18805/30955/23797/232227/76499/70839/21812/74006/238130/105855/12476/11501/20692/11852/16002/12339/18213/22084/12978/237860/215999/69601/16007/11855/67374/83397/14366/16001…
GO:0002521	GO:0002521	leukocyte differentiation	439	-0.283758	-1.44945	0.000749634	0.0310042	0.0278939	2385	tags=31%, list=25%, signal=24%	18030/234069/93760/19255/320940/107173/16477/14000/20351/83945/15242/207952/56218/11977/16818/16969/17305/18750/14159/12326/16476/19271/12398/12349/268564/17342/18021/20662/11909/228361/93685/21946/109880/22042/12606/16364/227525/20852/12142/11920/21934/328572/224860/74748/319817/381319/215653/101142/83766/18987/16453/98365/233328/22433/277360/24099/15900/74734/20807/13482/320404/28240/100201/227…
GO:0022407	GO:0022407	regulation of cell-cell adhesion	300	-0.284238	-1.39814	0.00395992	0.0856688	0.0770746	1570	tags=21%, list=16%, signal=18%	54371/68606/50918/22433/24099/74734/13482/320404/16190/22339/107527/12394/18708/17131/233405/70546/54607/16362/19697/83796/16194/66214/17196/18950/81601/269023/105855/12520/67155/11501/16002/11555/50791/22084/12053/17973/12519/14537/16923/229473/63953/26365/12774/74048/21872/18106/20315/94212/16195/16456/15001/69165/16768/21940/18762/15002/54698/16008/20555/50932/12775/12501/16197/20304
GO:0030098	GO:0030098	lymphocyte differentiation	311	-0.284531	-1.40446	0.00607995	0.100977	0.0908471	2385	tags=31%, list=25%, signal=24%	18030/234069/93760/19255/320940/14000/20351/83945/15242/207952/56218/11977/16818/16969/17305/19271/268564/18021/20662/11909/228361/93685/21946/109880/16364/227525/20852/12142/11920/328572/224860/74748/319817/101142/83766/18987/16453/22433/277360/24099/15900/74734/20807/13482/320404/22778/16190/16431/234779/107527/12394/18708/17131/16658/16848/16362/22780/16019/27060/83796/16205/16194/12229/12193/…
GO:0008361	GO:0008361	regulation of cell size	141	-0.284784	-1.26684	0.0923825	0.438272	0.394305	2301	tags=31%, list=24%, signal=24%	239667/20351/213084/12568/12168/12934/74610/11977/57138/328572/243743/108155/20430/12421/23945/11426/11941/29869/170731/20807/22339/14567/241296/171207/107723/97998/23797/54214/76499/382253/83704/18213/22084/11855/17762/18479/12774/20315/16531/330914/319740/26456/17751/16197
GO:0055074	GO:0055074	calcium ion homeostasis	180	-0.285257	-1.31881	0.053125	0.35492	0.319315	2587	tags=34%, list=27%, signal=26%	20541/23959/11820/320707/12752/238871/240174/13367/94249/68115/12568/64209/16818/18750/108837/107368/109676/18797/56384/12286/72844/18754/20866/216001/110891/11941/66259/66972/170731/28240/100201/16416/235574/234779/94178/64051/68027/12335/27060/15212/74011/76775/234515/16438/65973/16439/215999/11931/12774/22063/12307/54368/170770/74769/57340/12308/78506/18796/69810/269615/12298/20304
GO:0070085	GO:0070085	glycosylation	144	-0.285442	-1.27632	0.0889968	0.432418	0.389038	2097	tags=23%, list=22%, signal=18%	56336/74498/230101/224143/233824/244745/14595/108155/269181/238123/20454/55981/66789/17308/57170/207958/101351/99011/97884/381510/20452/218271/14537/76483/110911/20441/20444/12499/68304/52463/171212/17751/54613
GO:0032271	GO:0032271	regulation of protein polymerization	146	-0.285823	-1.28205	0.0780488	0.411455	0.370179	2420	tags=32%, list=25%, signal=24%	11519/14158/11845/23963/106763/225115/14159/13191/328108/228361/230101/218397/17257/13860/18754/54126/18753/76686/18613/20430/50918/277360/231637/26419/50884/56430/101497/214444/666244/76499/21916/100732/105855/50876/13548/237860/17973/243725/193740/17762/20393/72948/18479/22153/260315/14544/15511
GO:0002262	GO:0002262	myeloid cell homeostasis	144	-0.286019	-1.2789	0.0889968	0.432418	0.389038	1844	tags=23%, list=19%, signal=19%	15368/66663/14151/15251/108156/52065/16909/20807/320404/22778/22339/16658/11655/12229/105855/16598/67017/16331/208638/17289/12978/12053/56417/193740/16923/12628/319653/74769/26570/16409/110257/15511/15122
GO:0003013	GO:0003013	circulatory system process	238	-0.286229	-1.37652	0.0158036	0.173736	0.156307	1325	tags=20%, list=14%, signal=18%	72461/22339/26357/18708/69632/12289/17131/68667/64652/20525/78286/52150/19224/15165/16518/19274/235431/74006/238130/74318/16598/20416/11555/17258/53357/83397/11931/26365/207728/13805/80297/17423/21872/54409/16531/52589/16456/230857/13618/56485/18669/20404/98660/70729/17868/12741/12490/11554
GO:0002703	GO:0002703	regulation of leukocyte mediated immunity	158	-0.286246	-1.30458	0.0618067	0.375998	0.338279	2179	tags=30%, list=23%, signal=24%	72162/14159/268564/20910/11765/22042/14129/20852/15368/171285/232210/52118/16453/225471/56632/18806/13482/16190/234779/13051/17131/68667/20723/21355/93694/225888/329260/12229/12946/73747/19294/18950/105855/12520/17057/16002/12053/15007/26365/11542/74048/15042/225825/16768/16409/18762/54698/16197
GO:0048812	GO:0048812	neuron projection morphogenesis	444	-0.286405	-1.46258	0.000176484	0.0137639	0.0123831	2264	tags=31%, list=24%, signal=25%	213084/12568/12168/12934/18858/20983/53625/11977/20979/72162/18845/18750/17344/74143/56336/116838/20910/78808/74498/233489/20616/68404/17257/76454/109880/226251/12799/20403/12661/12286/76089/29859/81907/15185/328572/15572/71900/243743/20430/23945/105689/381979/22253/16572/11426/66515/19878/56386/19339/29869/73178/18786/12323/13518/19277/11785/223435/20266/170731/259277/93840/20807/26419/269116/50…
GO:0030217	GO:0030217	T cell differentiation	228	-0.28665	-1.37105	0.0178549	0.186556	0.167841	2373	tags=29%, list=25%, signal=22%	93760/19255/14000/20351/83945/207952/56218/11977/16818/268564/18021/20662/11909/228361/93685/109880/16364/20852/12142/319817/83766/16453/22433/277360/74734/20807/320404/22778/16190/107527/12394/17131/16658/16848/16362/22780/27060/83796/16205/16194/12193/18950/81601/233912/269023/321019/105855/17085/67155/11501/12053/16923/229473/63953/74048/15001/16428/16768/21940/18762/54698/50932/12775/12501/12…
GO:0001666	GO:0001666	response to hypoxia	135	-0.286775	-1.26235	0.0840198	0.425778	0.383065	2100	tags=31%, list=22%, signal=25%	12398/18021/11909/17257/12325/110876/99237/11920/15368/328572/18754/20544/15251/108155/19878/231002/74747/18806/13482/12955/22339/112406/12946/66214/16438/11501/16508/11555/56017/16439/22084/11797/14366/11931/18479/13805/16531/74769/230857/11863/17751/12490
GO:0019932	GO:0019932	second-messenger-mediated signaling	138	-0.286865	-1.26955	0.0888158	0.432418	0.389038	1370	tags=22%, list=14%, signal=19%	28240/22339/234779/12289/68667/56743/15944/16706/18576/70839/16438/18018/23984/243725/215999/51799/11931/17762/207728/217125/54195/12774/11542/16145/52589/230857/13618/243958/12501/12458
GO:0007416	GO:0007416	synapse assembly	120	-0.286904	-1.23191	0.122278	0.492584	0.443169	597	tags=15%, list=6%, signal=14%	50791/18213/243725/18164/217692/17762/18222/241638/18190/17260/14270/103967/76965/12217/236915/26875/18191/14394
GO:0050730	GO:0050730	regulation of peptidyl-tyrosine phosphorylation	155	-0.287217	-1.30449	0.0619048	0.37607	0.338343	1428	tags=21%, list=15%, signal=18%	67742/16416/22339/234779/74155/11477/225849/16362/67296/195018/16019/16194/21802/22612/12520/66610/13543/16002/547253/50754/18011/12978/12519/16923/74019/13385/53310/16195/260299/18762/22370/12501/20304
GO:0098609	GO:0098609	cell-cell adhesion	464	-0.28741	-1.47329	0.000450234	0.0243223	0.0218824	1542	tags=22%, list=16%, signal=20%	68606/50918/22433/94332/16419/24099/74734/12488/20807/13482/320404/16416/16190/235574/269116/22339/107527/12394/232370/13051/57781/18708/17131/11477/18717/233405/70546/54607/16362/76740/19697/235086/83796/16194/66214/17196/19294/19274/18950/70839/81601/269023/105855/12404/12520/67155/20416/11501/16002/53599/11555/50791/18763/13602/22084/12053/17973/12519/11877/70549/16007/67374/14537/16923/229473…
GO:0002683	GO:0002683	negative regulation of immune system process	285	-0.287974	-1.40766	0.00612672	0.100977	0.0908471	1279	tags=20%, list=13%, signal=18%	12394/13051/57781/18708/22163/17131/16835/16658/20723/68027/72147/21355/107321/380916/54607/93694/16362/14479/12229/12946/223752/269023/105855/234515/66294/16002/547253/14605/16331/17289/50754/22084/12053/12519/268857/69601/56417/229473/63953/26365/74048/20315/18600/18725/94212/243958/15001/217166/16768/236312/15002/54698/319430/13011/22174/20555/11815/16197
GO:0002443	GO:0002443	leukocyte mediated immunity	242	-0.289325	-1.4	0.0134647	0.161064	0.144906	2087	tags=28%, list=22%, signal=23%	268564/20910/11765/54445/20619/22042/14129/20852/15368/18753/17101/171285/232210/52118/18987/16453/98365/54123/225471/12890/56632/18806/13482/16190/234779/13051/17131/60504/68667/20723/56743/21355/22318/93694/225888/16019/27060/329260/12229/12946/73747/19294/18950/105855/12520/17057/16002/16331/12053/15007/12628/26365/11542/17423/74048/15042/19215/15001/225825/16768/16409/12986/18762/15002/54698/…
GO:0050863	GO:0050863	regulation of T cell activation	240	-0.289592	-1.39377	0.010642	0.14107	0.126918	799	tags=14%, list=8%, signal=13%	18950/81601/269023/105855/12520/67155/11501/16002/22084/12053/17973/12519/16923/229473/63953/26365/74048/18106/94212/16195/15001/69165/16768/21940/18762/15002/54698/16008/20555/12775/12501/16197/20304
GO:0036293	GO:0036293	response to decreased oxygen levels	138	-0.29017	-1.28418	0.0789474	0.414453	0.372876	2100	tags=31%, list=22%, signal=25%	12398/18021/11909/17257/12325/110876/99237/11920/15368/328572/18754/20544/15251/108155/19878/231002/74747/18806/13482/12955/22339/112406/18693/12946/66214/16438/11501/16508/11555/56017/16439/22084/11797/14366/11931/18479/13805/16531/74769/230857/11863/17751/12490
GO:0048813	GO:0048813	dendrite morphogenesis	136	-0.290405	-1.28062	0.0728477	0.403069	0.362634	2264	tags=32%, list=24%, signal=25%	213084/12568/11977/72162/17344/74143/74498/233489/76454/12286/76089/29859/15185/15572/71900/66515/19878/73178/12323/170731/26419/13047/13631/13542/21844/382253/74006/665113/17258/243725/14366/217692/77097/20393/18222/241638/19242/13385/103967/52463/224617/76484/228662/50932
GO:0006486	GO:0006486	protein glycosylation	131	-0.29099	-1.27244	0.077686	0.410889	0.369669	820	tags=13%, list=9%, signal=12%	207958/101351/99011/97884/381510/20452/218271/14537/76483/20441/20444/12499/68304/52463/171212/17751/54613
GO:0043413	GO:0043413	macromolecule glycosylation	131	-0.29099	-1.27244	0.077686	0.410889	0.369669	820	tags=13%, list=9%, signal=12%	207958/101351/99011/97884/381510/20452/218271/14537/76483/20441/20444/12499/68304/52463/171212/17751/54613
GO:0007623	GO:0007623	circadian rhythm	131	-0.291286	-1.27373	0.077686	0.410889	0.369669	1858	tags=24%, list=19%, signal=20%	16490/21934/328572/12952/50789/108155/219158/105689/53376/19878/26414/79362/26419/268903/229599/217732/224671/81601/12916/16508/13548/18213/50754/11906/432530/16531/353187/19215/382056/18628/217166/11554
GO:0098876	GO:0098876	vesicle-mediated transport to the plasma membrane	109	-0.291547	-1.23311	0.123311	0.493636	0.444115	3021	tags=41%, list=31%, signal=29%	73288/320982/20660/53611/54645/106572/18777/228960/76561/107371/71517/99371/12752/11845/20336/209131/106522/20619/18195/102058/12889/11426/78618/26414/227648/76688/68505/74205/235574/70546/234593/75914/22318/329260/54214/67213/70785/226744/268451/16897/70829/269338/20614/56216/213760
GO:0002274	GO:0002274	myeloid leukocyte activation	154	-0.291657	-1.32142	0.0526316	0.352711	0.317327	2646	tags=39%, list=28%, signal=29%	12259/14131/14389/94176/11820/21813/216161/15980/14158/12493/16414/106763/19204/18783/69188/14159/12326/16476/17470/16478/20910/20619/12606/16364/11920/19267/15368/18754/18753/171285/381319/16170/52065/74734/268567/12890/56632/18806/16190/234779/13051/16835/224938/22038/56743/22318/12229/19294/15979/360013/18129/12978/11542/18106/19215/217166/225825/16409/13011/20304
GO:0070661	GO:0070661	leukocyte proliferation	232	-0.292505	-1.40342	0.00700375	0.108153	0.0973031	982	tags=16%, list=10%, signal=15%	16362/22780/16019/27060/227059/12229/18950/233912/321019/105855/12520/12476/16002/16331/22084/12978/12053/17973/12519/229473/26365/17260/74048/18106/20315/16195/243958/69165/21940/16409/20849/54698/16008/20555/12775/12501/16197/20304
GO:0007612	GO:0007612	learning	106	-0.292956	-1.2349	0.116861	0.485653	0.436933	2768	tags=41%, list=29%, signal=29%	15932/353342/12912/18013/11820/23829/12752/27103/13844/432572/12568/12227/16476/57138/17257/109880/15572/108012/15251/72108/381979/110891/20807/234593/319984/11980/54006/195018/19224/18574/11555/268934/218038/20393/18479/14811/18190/19242/20614/57340/26570/18191/98660
GO:0048762	GO:0048762	mesenchymal cell differentiation	129	-0.293477	-1.28067	0.0762852	0.410889	0.369669	1758	tags=26%, list=18%, signal=21%	15251/18793/18569/66515/24064/19878/93840/22339/98711/65100/17131/22722/11477/102693/21844/100169/66214/76499/75745/21812/80288/22772/21859/18018/22084/69601/67525/13805/17260/13618/218850/26456/12842
GO:0070507	GO:0070507	regulation of microtubule cytoskeleton organization	128	-0.293593	-1.27948	0.079602	0.416341	0.374574	2151	tags=30%, list=22%, signal=23%	246103/14159/13191/215351/328108/230101/17257/74392/15185/20262/54126/76686/56289/29877/26419/28105/56430/214444/102693/68121/17318/76499/100732/12121/13548/18763/193740/330938/17762/20393/72948/18479/74019/22153/260315/14544/12695/15511
GO:0006874	GO:0006874	intracellular calcium ion homeostasis	172	-0.294012	-1.3554	0.0403727	0.304096	0.27359	2437	tags=33%, list=25%, signal=25%	12752/238871/240174/13367/94249/68115/12568/64209/16818/18750/108837/107368/109676/18797/56384/12286/72844/18754/20866/216001/110891/11941/66972/170731/28240/100201/16416/235574/234779/94178/64051/68027/12335/27060/15212/74011/76775/234515/16438/65973/16439/215999/11931/12774/22063/12307/54368/170770/74769/57340/12308/78506/18796/69810/269615/12298/20304
GO:0008015	GO:0008015	blood circulation	218	-0.294016	-1.40405	0.00876057	0.124683	0.112175	1325	tags=21%, list=14%, signal=18%	72461/22339/18708/69632/12289/17131/68667/64652/78286/52150/19224/15165/16518/19274/235431/74006/238130/74318/16598/20416/11555/17258/53357/83397/11931/26365/207728/13805/80297/17423/21872/54409/16531/52589/16456/230857/13618/56485/20404/98660/70729/17868/12741/12490/11554
GO:0010976	GO:0010976	positive regulation of neuron projection development	152	-0.294046	-1.33336	0.0522979	0.351733	0.316448	1982	tags=28%, list=21%, signal=23%	16974/109880/227541/76089/328572/18519/15572/71900/13803/20430/208647/16403/12323/11785/20266/170731/22339/56430/223255/13631/13542/234593/225849/20317/52906/21844/74006/16438/50791/18213/22084/17973/243725/69601/16001/11932/17762/19242/382056/11504/18546/23969/50769
GO:0008286	GO:0008286	insulin receptor signaling pathway	99	-0.294219	-1.22766	0.122896	0.493153	0.443681	2192	tags=35%, list=23%, signal=28%	12927/20402/83946/14158/19255/104215/18750/12702/74143/19271/20913/20662/233410/18718/16337/19267/18753/108155/19262/16367/108083/192157/170731/18708/19697/19062/20416/16002/56017/22084/17973/16001/18479/320706/18762
GO:0045765	GO:0045765	regulation of angiogenesis	163	-0.295171	-1.34811	0.0414013	0.309064	0.278059	1758	tags=26%, list=18%, signal=22%	15251/20866/20684/24064/19878/22433/239528/16416/17125/22339/12394/13051/68545/20317/23797/14645/66214/19274/18576/15277/216527/16598/20416/20692/13855/11852/16002/11555/236511/69601/16923/60611/26365/13805/19242/21872/54409/74769/11504/12741/12490/13179/20304
GO:0051258	GO:0051258	protein polymerization	194	-0.295325	-1.38021	0.0141206	0.165241	0.148664	2420	tags=32%, list=25%, signal=24%	11519/14158/11845/76707/13367/23963/106763/26428/225115/14159/13191/328108/228361/230101/218397/17257/13860/18754/51885/54126/18753/76686/18613/20430/74569/69807/73178/50918/277360/231637/29877/26419/50884/56430/101497/214444/14457/666244/233276/76499/21916/100732/74006/105855/76789/50876/13548/237860/17973/243725/193740/17762/20393/72948/18479/241112/22153/260315/76467/14544/15511/22370
GO:0030218	GO:0030218	erythrocyte differentiation	104	-0.295404	-1.24169	0.112985	0.478889	0.430847	3299	tags=44%, list=34%, signal=29%	12633/20848/18771/18023/20683/17096/217864/26416/233904/12192/22695/11480/17684/217127/107371/20185/12611/13819/19255/69188/16969/238247/226844/66663/14151/15251/52065/16909/20807/22778/22339/16658/11655/105855/16598/67017/16331/208638/12053/56417/193740/16923/319653/110257/15511/15122
GO:0002250	GO:0002250	adaptive immune response	269	-0.295633	-1.43847	0.00487601	0.0926885	0.0833901	1902	tags=25%, list=20%, signal=21%	16364/14129/227525/20852/12142/21934/18753/17101/171285/319817/232210/52118/18987/16453/54123/24099/67742/13482/16190/22339/13051/17131/60504/68667/94178/20723/56743/21355/16362/225888/16019/27060/329260/16194/12229/12946/73747/19294/18950/321019/105855/12520/17085/16331/12053/15007/63953/12628/17260/74048/18106/15042/94212/229603/243958/15001/225825/16428/16768/12986/18762/15002/54698/20555/1277…
GO:0045619	GO:0045619	regulation of lymphocyte differentiation	153	-0.296287	-1.34136	0.0478469	0.337448	0.303596	2376	tags=31%, list=25%, signal=24%	234069/93760/19255/320940/14000/207952/16818/268564/20662/228361/21946/109880/12142/74748/319817/83766/16453/22433/74734/320404/16190/107527/12394/17131/16362/22780/83796/12193/18950/81601/269023/105855/67155/11501/74039/16331/12053/16923/229473/63953/74048/15001/16768/21940/18762/54698/12775/16197
GO:0007610	GO:0007610	behavior	404	-0.29641	-1.50426	0.000348082	0.0205425	0.0184817	1971	tags=28%, list=21%, signal=23%	17257/109880/20744/12799/13860/12661/16337/26431/110876/12286/16490/13350/77128/328572/18754/15572/14406/14894/98685/108012/15251/72108/381979/110891/53376/12804/66612/26414/11941/67772/17134/66259/233878/20273/259277/20807/13482/12394/13051/72961/16440/68667/16835/224938/13542/78286/234593/20317/52906/110532/319984/11980/54006/195018/19224/15165/15212/229599/18574/21916/22026/224671/50876/239102…
GO:0007600	GO:0007600	sensory perception	192	-0.297109	-1.38753	0.0191953	0.192407	0.173105	1281	tags=22%, list=13%, signal=19%	98711/12289/16440/13040/78286/109689/269473/19224/18575/15212/17196/97031/224671/268755/239102/22772/16508/11555/20512/19662/77945/208922/14366/68955/12628/14811/80297/21872/20315/23821/16531/225362/17984/70355/13618/18796/73750/12842/64337/50769/11554/12298
GO:1902075	GO:1902075	cellular response to salt	110	-0.297999	-1.26567	0.0976431	0.449206	0.404142	2312	tags=38%, list=24%, signal=29%	16477/11513/20983/20979/16476/16478/18021/17257/109880/12606/233908/20866/70568/19878/231637/17069/66972/54525/20469/320404/28240/234779/11690/68667/54153/94178/12335/80976/70839/16438/20512/17258/65973/20511/18164/20597/17260/22063/13385/20980/60510/17067
GO:0070663	GO:0070663	regulation of leukocyte proliferation	173	-0.298552	-1.37598	0.0303043	0.252057	0.226771	982	tags=17%, list=10%, signal=16%	16362/22780/16019/227059/12229/18950/321019/105855/12520/16002/16331/22084/12978/12053/17973/12519/229473/26365/17260/74048/18106/16195/243958/69165/54698/16008/20555/12775/12501/20304
GO:0048872	GO:0048872	homeostasis of number of cells	253	-0.29898	-1.44365	0.00307671	0.0761447	0.068506	1494	tags=23%, list=16%, signal=20%	15368/66663/14151/15251/319817/215653/16453/108156/52065/24099/16909/20807/320404/22778/17761/22339/13051/20482/22163/67561/11798/16658/11655/14055/27060/23797/320405/12229/321019/105855/67155/16598/67017/14766/14605/16331/208638/170758/17289/12978/12053/56417/193740/16923/12628/319653/78591/17260/74769/16151/26570/16409/110257/20849/15511/12775/15122/16197
GO:0048675	GO:0048675	axon extension	99	-0.299322	-1.24895	0.106061	0.467001	0.420152	2301	tags=30%, list=24%, signal=23%	239667/20351/213084/12568/12168/12934/328572/243743/20430/23945/11426/29869/20807/22339/14567/13542/171207/54214/76499/382253/18213/17762/18479/12774/20315/330914/17984/319740/26456/17751
GO:0007599	GO:0007599	hemostasis	93	-0.300075	-1.23917	0.124161	0.495942	0.44619	1156	tags=22%, list=12%, signal=19%	18717/192232/233405/12495/16194/70839/11555/17289/16923/12628/26365/54368/74769/16456/74145/19128/26570/22174/12490/22370
GO:0010632	GO:0010632	regulation of epithelial cell migration	145	-0.300172	-1.34744	0.041868	0.312084	0.280776	2642	tags=37%, list=27%, signal=27%	12927/14389/74030/11881/26921/18707/21813/18591/11845/76707/18704/20351/12168/56218/18750/16600/16476/17257/15368/15185/18754/20401/15251/16367/20684/11426/19878/68606/16416/72461/22339/234779/20317/30955/23797/14645/66214/232227/76499/19274/20692/11852/16002/12339/50754/69601/11855/63953/26365/17260/74769/330662/13179/12458
GO:0016358	GO:0016358	dendrite development	223	-0.300589	-1.43541	0.00560702	0.0976357	0.087841	2264	tags=30%, list=24%, signal=24%	213084/12568/11977/72162/50790/17344/74143/57138/74498/233489/17257/76454/227541/12286/76089/29859/15185/15572/13196/71900/20430/83766/66515/19878/73178/12323/277360/170731/26419/13047/56430/13631/13542/21844/232227/382253/74006/665113/17258/22084/18011/243725/69601/208922/14366/217692/77097/20393/18479/18222/241638/19242/17260/13385/14270/103967/110197/382056/52463/224617/76484/228662/56508/2396…
GO:1901342	GO:1901342	regulation of vasculature development	166	-0.300731	-1.37796	0.0184078	0.187588	0.168769	1362	tags=27%, list=14%, signal=23%	15251/20866/20684/24064/19878/22433/239528/16416/17125/22339/12394/13051/68545/20317/23797/14645/66214/19274/18576/15277/216527/16598/20416/20692/13855/11852/16002/11555/236511/69601/16923/60611/26365/13805/19242/21872/54409/74769/654812/11504/12741/12490/13179/20304
GO:0003018	GO:0003018	vascular process in circulatory system	106	-0.300765	-1.26782	0.100167	0.45296	0.40752	1316	tags=23%, list=14%, signal=20%	22339/26357/68667/20525/19224/19274/238130/16598/20416/11555/53357/83397/26365/207728/21872/54409/16531/230857/13618/18669/20404/98660/12741/11554
GO:2000146	GO:2000146	negative regulation of cell motility	186	-0.301267	-1.40141	0.0121398	0.152858	0.137524	1402	tags=21%, list=15%, signal=18%	20807/77574/13482/13051/57781/223255/64652/234593/269003/20317/66082/110532/171207/380916/66214/76499/19274/11852/14766/50791/69601/63953/114886/11932/13805/12774/19242/17260/11542/14270/20315/18600/260315/52463/353156/319430/12741/13179/11815
GO:0032943	GO:0032943	mononuclear cell proliferation	210	-0.302697	-1.4349	0.0071306	0.108558	0.0976676	982	tags=17%, list=10%, signal=16%	16362/22780/16019/227059/12229/18950/233912/321019/105855/12520/12476/16002/16331/22084/12978/12053/17973/12519/229473/26365/17260/74048/18106/20315/16195/243958/69165/21940/16409/54698/16008/20555/12775/12501/16197/20304
GO:0060326	GO:0060326	cell chemotaxis	167	-0.303412	-1.38739	0.020401	0.19635	0.176652	1852	tags=26%, list=19%, signal=21%	75458/18753/19252/74748/17101/13609/56744/98365/16170/20306/277360/19277/13482/28240/22339/13051/68667/12642/21844/74006/238130/321019/105855/11501/20301/12978/215999/269608/13805/19242/20315/18600/270152/13618/102103/16409/12986/20305/319430/20343/12775/12458/20304
GO:0046631	GO:0046631	alpha-beta T cell activation	123	-0.303695	-1.30841	0.0659898	0.388024	0.349098	2558	tags=34%, list=27%, signal=25%	94176/15284/208650/20185/21813/16396/20351/207952/11977/11909/93685/109880/320484/16364/20852/12142/319817/16453/320404/16190/12394/17131/16362/27060/16205/16194/18950/233912/321019/105855/12520/17085/12053/12519/74048/18106/16428/18762/54698/12775/72310/12501
GO:0045580	GO:0045580	regulation of T cell differentiation	129	-0.304397	-1.32832	0.0497512	0.342504	0.308145	2373	tags=31%, list=25%, signal=24%	93760/19255/14000/207952/16818/268564/20662/228361/109880/12142/319817/83766/16453/22433/74734/320404/16190/107527/12394/17131/16362/83796/18950/81601/269023/105855/67155/11501/12053/16923/229473/63953/74048/15001/16768/21940/18762/54698/12775/16197
GO:0019722	GO:0019722	calcium-mediated signaling	99	-0.305008	-1.27268	0.0942761	0.441857	0.397531	1370	tags=22%, list=14%, signal=19%	28240/234779/12289/68667/56743/15944/70839/16438/18018/243725/215999/11931/17762/217125/12774/11542/16145/52589/13618/243958/12501/12458
GO:0046651	GO:0046651	lymphocyte proliferation	206	-0.306631	-1.45073	0.0059342	0.0997105	0.0897077	982	tags=17%, list=10%, signal=16%	16362/22780/16019/227059/12229/18950/233912/321019/105855/12520/12476/16002/16331/22084/12978/12053/17973/12519/229473/26365/17260/74048/18106/20315/16195/243958/69165/21940/16409/54698/16008/20555/12775/12501/16197/20304
GO:0034764	GO:0034764	positive regulation of transmembrane transport	131	-0.307616	-1.34514	0.0330514	0.266533	0.239795	2461	tags=37%, list=26%, signal=28%	15980/13483/19055/68943/13844/19204/12568/11977/104215/432442/16485/12349/109676/12293/69179/24012/218397/109880/16337/18753/20544/76686/12300/16367/20866/170731/77574/234779/12289/13040/12335/15165/16518/11636/57816/11555/17258/65973/20511/11931/11932/22063/18823/69810/18669/16502/11554/12298
GO:0051251	GO:0051251	positive regulation of lymphocyte activation	220	-0.307617	-1.47234	0.005828	0.0996953	0.0896941	982	tags=16%, list=10%, signal=15%	16362/225888/16019/83796/227059/12229/73747/18950/81601/321019/105855/12520/67155/11501/16002/16331/12978/12053/17973/12519/63953/17260/74048/18106/16195/15001/69165/21940/18762/15002/16008/12775/12501/16197/20304
GO:0002696	GO:0002696	positive regulation of leukocyte activation	255	-0.307776	-1.48737	0.00195089	0.0583598	0.0525052	2380	tags=31%, list=25%, signal=24%	329559/234069/93760/13844/320940/16414/106763/11534/19204/83945/18783/207952/16818/268564/16478/20910/11765/228361/330817/320484/22042/12606/20852/17101/171285/232210/83766/16453/225471/16170/22433/24099/74734/56632/18806/13482/320404/16190/107527/12394/22163/16362/225888/16019/83796/227059/12229/73747/19294/18950/81601/321019/105855/12520/67155/11501/16002/16331/12978/12053/17973/12519/63953/172…
GO:0050851	GO:0050851	antigen receptor-mediated signaling pathway	125	-0.309106	-1.341	0.0519263	0.351114	0.315891	1052	tags=16%, list=11%, signal=14%	56743/107321/16019/19697/329260/227059/12229/19294/105855/12520/74039/101476/17260/17060/16151/225825/16428/12775/12298/12501
GO:0050867	GO:0050867	positive regulation of cell activation	267	-0.309207	-1.50698	0.00189808	0.0581461	0.052313	2380	tags=32%, list=25%, signal=25%	329559/234069/93760/13844/320940/16414/106763/11534/19204/83945/18783/207952/16818/19271/268564/16478/20910/11765/228361/330817/320484/22042/12606/20852/13350/17101/171285/232210/83766/16453/225471/16170/22433/24099/74734/56632/20111/18806/13482/320404/16190/107527/12394/22163/12335/16362/225888/16019/83796/227059/12229/73747/19294/18950/81601/321019/105855/12520/67155/11501/16002/16331/12978/120…
GO:0050920	GO:0050920	regulation of chemotaxis	123	-0.309245	-1.33232	0.0541455	0.358875	0.322873	1815	tags=24%, list=19%, signal=20%	19252/74748/243743/13609/105689/16170/73178/68606/20306/13482/22339/13051/21844/70839/74006/321019/105855/18213/12978/215999/19242/20315/18600/102103/319430/26456/20343/12775/12458/20304
GO:0016241	GO:0016241	regulation of macroautophagy	89	-0.309772	-1.26902	0.107744	0.469277	0.4222	2635	tags=34%, list=27%, signal=25%	67588/76561/17281/12752/68943/209131/67846/228361/56480/18718/15368/15185/225131/15251/108083/75669/140742/227738/15944/74374/223649/11555/54636/170625/22084/16145/16151/100502698/100504663/13179
GO:0002449	GO:0002449	lymphocyte mediated immunity	179	-0.31027	-1.43487	0.00950869	0.131241	0.118075	1226	tags=20%, list=13%, signal=18%	17131/60504/68667/20723/21355/93694/225888/16019/27060/329260/12229/12946/73747/19294/18950/105855/12520/17057/16002/16331/12053/15007/12628/26365/74048/15042/15001/225825/16768/12986/18762/15002/54698/72310/12458/16197
GO:0019221	GO:0019221	cytokine-mediated signaling pathway	228	-0.311657	-1.49066	0.00326443	0.0782549	0.0704045	2049	tags=28%, list=21%, signal=22%	20303/56480/54473/432940/12606/80876/20852/77128/216190/21934/15251/56744/16453/54199/12804/23849/54123/225471/16170/69807/20306/24099/16190/60595/13051/60504/22234/15944/16362/19697/17951/229700/54131/16194/19766/15979/73086/230594/547253/17948/12978/67338/56417/193740/16923/26365/20315/18600/384309/18725/16880/16145/16195/263876/12986/20849/15511/20305/67445/17751/12775/16197/20304
GO:0070588	GO:0070588	calcium ion transmembrane transport	170	-0.312386	-1.43557	0.0123692	0.154942	0.139398	2126	tags=45%, list=22%, signal=35%	14265/18854/68795/20617/56089/14360/66815/74777/56437/109305/170756/116873/233571/20541/227731/320707/238871/19055/13367/94249/68115/12568/16818/108837/74143/14579/109676/14697/12293/69179/18797/56384/12286/18754/20544/252972/12300/20866/216001/110891/11941/66972/28240/16416/235574/234779/12289/16440/68667/94178/12335/30955/70839/16438/11555/65973/18763/16439/53357/215999/11931/14811/12774/22063/…
GO:0034330	GO:0034330	cell junction organization	467	-0.312495	-1.60294	2.70708e-05	0.00388582	0.003496	2011	tags=31%, list=21%, signal=26%	233489/109333/20616/17257/20853/328133/74392/16337/12286/76089/81907/15185/54126/20401/14406/13196/99633/243743/12300/18613/108155/20430/19262/105689/110891/77116/11426/19878/11941/94190/19339/73178/68606/12323/20615/13518/245684/231637/19277/233878/67533/11785/170731/259277/12488/20807/16416/269116/22339/60595/232370/13051/18708/18027/17131/208898/103172/13631/13542/223666/230235/53321/70546/244…
GO:1902904	GO:1902904	negative regulation of supramolecular fiber organization	117	-0.312518	-1.3294	0.0621762	0.376632	0.338849	1931	tags=28%, list=20%, signal=23%	13860/74392/213556/15185/54126/18753/76686/18613/13609/50918/231637/29877/170731/12955/18708/16835/666244/18693/17318/76499/21916/235431/19062/50876/13548/233977/237860/243725/20393/21872/22153/16456/260315
GO:0050817	GO:0050817	coagulation	94	-0.313424	-1.29885	0.0757576	0.410259	0.369103	1156	tags=21%, list=12%, signal=19%	18717/192232/233405/12495/16194/70839/11555/17289/16923/12628/26365/54368/74769/16456/74145/19128/26570/22174/12490/22370
GO:0022898	GO:0022898	regulation of transmembrane transporter activity	150	-0.313502	-1.41899	0.0133537	0.160885	0.144745	2461	tags=35%, list=26%, signal=26%	15980/238871/19055/68943/13844/19204/15275/12568/11977/432442/18750/16485/14579/109676/14697/12293/69179/12286/20544/12300/20866/56632/20266/77574/234779/12289/13040/83997/22318/15165/18693/435145/19766/57816/11555/65973/53357/260297/11931/11932/14811/17260/13385/57340/69106/18669/16502/98660/19894/50932/11554/12298
GO:0031644	GO:0031644	regulation of nervous system process	102	-0.313848	-1.31566	0.0655462	0.386961	0.348142	1892	tags=30%, list=20%, signal=25%	14129/81907/20544/23945/110891/77116/108013/19878/231637/259277/13542/13040/235086/224997/12404/239102/11555/18164/67374/72948/14811/18190/13385/56216/13618/224617/18762/26875/56508/116837/13011
GO:0032412	GO:0032412	regulation of monoatomic ion transmembrane transporter activity	145	-0.314042	-1.40971	0.0179481	0.186556	0.167841	2461	tags=35%, list=26%, signal=27%	15980/238871/19055/68943/13844/19204/15275/12568/11977/432442/18750/16485/14579/109676/14697/12293/69179/12286/20544/12300/20866/56632/20266/77574/234779/12289/13040/83997/22318/15165/18693/435145/57816/11555/65973/53357/260297/11931/11932/14811/17260/13385/57340/69106/18669/16502/98660/19894/50932/11554/12298
GO:0099177	GO:0099177	regulation of trans-synaptic signaling	336	-0.314475	-1.5609	0.000272696	0.0176342	0.0158652	1976	tags=30%, list=21%, signal=25%	68404/17257/109880/20853/26431/12286/76089/81907/18754/224860/12889/12300/20430/19262/23945/381979/110891/77116/108013/11941/94190/19339/12323/20615/70510/12890/231637/223435/54525/20807/26419/232370/13051/16440/227120/208898/64652/13542/230235/70546/66082/22318/319984/207227/195018/15165/18693/14645/435145/232227/224997/382253/224671/74006/268755/12404/11555/20512/245666/53357/16504/268934/18011…
GO:1903037	GO:1903037	regulation of leukocyte cell-cell adhesion	231	-0.314905	-1.51011	0.00210304	0.0590261	0.0531047	992	tags=16%, list=10%, signal=15%	54607/16362/19697/83796/18950/81601/269023/105855/12520/67155/11501/16002/22084/12053/17973/12519/14537/229473/63953/26365/74048/18106/20315/94212/16195/15001/69165/16768/21940/18762/15002/54698/16008/20555/12775/12501/16197/20304
GO:1903900	GO:1903900	regulation of viral life cycle	90	-0.315899	-1.29224	0.0878378	0.431778	0.388462	1132	tags=29%, list=12%, signal=26%	109333/78781/20853/80876/13205/19106/98999/17069/17535/22038/12642/110532/80287/19294/19062/56417/67525/20597/76681/384309/69165/218850/236312/209387/22174/20304
GO:0010466	GO:0010466	negative regulation of peptidase activity	98	-0.316147	-1.31739	0.0633333	0.380196	0.342055	1429	tags=23%, list=15%, signal=20%	20111/12955/22339/67770/12406/11798/20723/109689/20317/13010/17951/21859/17948/67338/20732/110595/15511/236312/13011/20745/17751/209378/22370
GO:0097529	GO:0097529	myeloid leukocyte migration	135	-0.316526	-1.39331	0.0242773	0.218526	0.196604	2159	tags=28%, list=22%, signal=22%	18750/17470/19271/20303/227541/75458/14595/19252/74748/17101/18613/56744/20306/277360/19277/13482/22339/13051/57781/18708/70839/74006/105855/12520/11501/12978/215999/20315/270152/13618/102103/16409/12986/20305/319430/20343/12775/20304
GO:0050804	GO:0050804	modulation of chemical synaptic transmission	335	-0.317289	-1.57482	0.000142681	0.0115797	0.010418	1976	tags=30%, list=21%, signal=25%	68404/17257/109880/20853/26431/12286/76089/81907/18754/224860/12889/12300/20430/19262/23945/381979/110891/77116/108013/11941/94190/19339/12323/20615/70510/12890/231637/223435/54525/20807/26419/232370/13051/16440/227120/208898/64652/13542/230235/70546/66082/22318/319984/207227/195018/15165/18693/14645/435145/232227/224997/382253/224671/74006/268755/12404/11555/20512/245666/53357/16504/268934/18011…
GO:0043270	GO:0043270	positive regulation of monoatomic ion transport	126	-0.318261	-1.38608	0.0202206	0.195738	0.176102	2479	tags=38%, list=26%, signal=29%	12361/18591/15980/13483/19055/68943/13844/19204/12568/11977/432442/16485/109676/12293/69179/24012/20544/12300/20866/16453/11941/56632/20266/77574/234779/12289/13040/12335/15165/23797/16518/70839/57816/16438/11555/65973/11931/11932/20393/22063/18823/20315/69810/18669/16502/11554/12298/20304
GO:0042098	GO:0042098	T cell proliferation	152	-0.318608	-1.44474	0.0138702	0.163577	0.147167	799	tags=16%, list=8%, signal=15%	18950/233912/105855/12520/12476/16002/22084/12053/17973/12519/229473/26365/74048/18106/20315/16195/69165/16409/54698/16008/20555/12775/12501/20304
GO:0032409	GO:0032409	regulation of transporter activity	156	-0.319157	-1.44696	0.00783856	0.115497	0.10391	2461	tags=35%, list=26%, signal=27%	15980/238871/19055/68943/13844/19204/15275/12568/11977/432442/18750/16485/14579/109676/14697/12293/69179/16337/12286/18753/20544/12300/20866/56632/20266/77574/234779/12289/13040/83997/22318/15165/18693/80281/435145/19766/57816/11555/65973/53357/260297/11931/11932/14811/17260/13385/57340/69106/18669/16502/98660/19894/50932/11554/12298
GO:0050890	GO:0050890	cognition	209	-0.319592	-1.516	0.00227119	0.061678	0.0554906	2483	tags=36%, list=26%, signal=28%	23829/16181/12752/238871/27103/13844/432572/54720/106763/12568/20983/12227/18750/12326/16476/57138/233489/17257/109880/12661/110876/328572/15572/108012/15251/72108/20430/381979/110891/66259/259277/20807/13051/72961/16440/68667/76071/16835/224938/234593/20317/319984/11980/54006/195018/19224/74319/18574/224671/50876/16002/11555/53357/268934/260297/208922/218038/17762/20393/18479/14811/18190/19242/1…
GO:0032944	GO:0032944	regulation of mononuclear cell proliferation	159	-0.319769	-1.45535	0.011309	0.146813	0.132085	982	tags=19%, list=10%, signal=17%	16362/22780/16019/227059/12229/18950/321019/105855/12520/16002/16331/22084/12978/12053/17973/12519/229473/26365/17260/74048/18106/16195/243958/69165/54698/16008/20555/12775/12501/20304
GO:0030336	GO:0030336	negative regulation of cell migration	180	-0.319838	-1.47869	0.00494767	0.0930976	0.0837582	1402	tags=22%, list=15%, signal=19%	20807/77574/13482/13051/57781/223255/64652/234593/269003/20317/66082/110532/171207/380916/66214/76499/19274/11852/14766/50791/69601/63953/114886/11932/13805/12774/19242/17260/11542/14270/20315/18600/260315/52463/353156/319430/12741/13179/11815
GO:0030516	GO:0030516	regulation of axon extension	80	-0.320191	-1.2811	0.0952381	0.442652	0.398246	2388	tags=35%, list=25%, signal=27%	17136/239667/20351/213084/12568/12168/12934/328572/243743/20430/23945/11426/20807/22339/14567/171207/54214/76499/382253/18213/17762/18479/12774/20315/330914/319740/26456/17751
GO:0050905	GO:0050905	neuromuscular process	93	-0.320586	-1.32387	0.0671141	0.390708	0.351513	2216	tags=32%, list=23%, signal=25%	18858/67269/16485/13191/17257/12286/66663/108012/105689/11941/67772/12323/13542/53321/110532/226594/319984/16518/15212/16438/11555/20512/170758/12628/14811/13385/23821/16531/57340/50769
GO:0001837	GO:0001837	epithelial to mesenchymal transition	85	-0.32073	-1.3029	0.090301	0.434552	0.390958	2565	tags=39%, list=27%, signal=29%	67888/114716/21813/52662/76707/218952/67898/100182/207806/16974/15251/18569/66515/24064/19878/93840/22339/17131/11477/102693/21844/66214/76499/75745/21812/80288/18018/22084/69601/67525/13805/218850/12842
GO:0050731	GO:0050731	positive regulation of peptidyl-tyrosine phosphorylation	102	-0.320816	-1.34488	0.0521008	0.351733	0.316448	1362	tags=23%, list=14%, signal=20%	16416/22339/234779/11477/16019/16194/21802/22612/12520/66610/13543/16002/547253/50754/18011/12978/12519/13385/53310/16195/22370/12501/20304
GO:0048511	GO:0048511	rhythmic process	177	-0.321404	-1.48363	0.00368612	0.0823069	0.07405	1858	tags=27%, list=19%, signal=22%	16490/21934/328572/18519/12952/50789/108155/219158/105689/53376/19878/26414/79362/170731/26419/12394/244891/18044/268903/109689/229599/217732/224671/81601/74006/16601/12916/16508/13548/18213/50754/101476/11906/14366/16001/14811/19242/432530/16531/353187/19215/382056/18628/30953/11504/217166/22174/11554
GO:0050670	GO:0050670	regulation of lymphocyte proliferation	157	-0.321708	-1.45897	0.014404	0.167088	0.150326	982	tags=19%, list=10%, signal=17%	16362/22780/16019/227059/12229/18950/321019/105855/12520/16002/16331/22084/12978/12053/17973/12519/229473/26365/17260/74048/18106/16195/243958/69165/54698/16008/20555/12775/12501/20304
GO:0023061	GO:0023061	signal release	317	-0.322009	-1.59055	0.000107748	0.00984227	0.00885491	2329	tags=35%, list=24%, signal=27%	75597/18747/67760/20394/98170/19015/18783/20983/20979/50790/18750/59090/20913/116838/20910/78808/20619/16973/18012/20616/27204/27062/109880/26431/12286/16490/13350/21934/18754/12952/54126/15251/12889/16367/20866/11481/381979/20965/108030/19339/22433/20615/66259/12890/54525/170731/28240/214597/12394/12289/208898/68667/64652/13542/64051/109689/16522/13017/80976/21844/22318/12495/18642/207227/19224/…
GO:0030099	GO:0030099	myeloid cell differentiation	294	-0.322908	-1.58413	0.000142902	0.0115797	0.010418	3299	tags=46%, list=34%, signal=31%	12633/14281/20848/18771/18023/245944/14102/98386/22041/56637/20683/17096/217864/26416/18032/12608/18854/233904/18015/14628/12192/210710/16842/14815/21950/20308/15499/22695/11308/11480/17684/217127/12912/17869/244349/67588/14389/107371/67773/11820/20185/21813/216161/19055/12611/13819/19255/107173/16477/15242/242687/69188/16969/18750/14159/12326/16476/12398/12349/17342/238247/53621/22042/12606/2268…
GO:0050808	GO:0050808	synapse organization	337	-0.32296	-1.60428	7.41292e-05	0.0074485	0.00670128	1889	tags=31%, list=20%, signal=26%	16337/12286/81907/15185/54126/14406/13196/99633/243743/12300/108155/20430/105689/110891/77116/19878/11941/94190/19339/73178/12323/20615/245684/231637/19277/233878/67533/11785/170731/259277/12488/16416/269116/232370/13051/18708/18027/208898/103172/13631/13542/223666/230235/53321/70546/21844/235086/18693/72289/67943/382253/83767/74006/12404/73086/104069/20692/20661/11852/233977/50791/13602/170758/1…
GO:0022409	GO:0022409	positive regulation of cell-cell adhesion	202	-0.322994	-1.52495	0.00231737	0.0625939	0.0563145	982	tags=24%, list=10%, signal=22%	171285/18793/83766/16403/16453/54371/22433/24099/74734/13482/320404/16190/107527/12394/17131/16362/19697/83796/16194/18950/81601/105855/12520/67155/11501/16002/12053/17973/12519/14537/63953/26365/12774/74048/21872/18106/16195/16456/15001/69165/21940/18762/15002/16008/12775/12501/16197/20304
GO:0014812	GO:0014812	muscle cell migration	78	-0.323085	-1.28578	0.0972696	0.448744	0.403727	376	tags=10%, list=4%, signal=10%	18479/17260/16195/11504/353156/56508/22370/20304
GO:0021549	GO:0021549	cerebellum development	76	-0.323279	-1.27887	0.106897	0.468462	0.421467	2252	tags=28%, list=23%, signal=21%	12568/67269/11977/18012/16974/17257/12286/11941/94190/233878/78286/22026/12404/330938/14366/16001/57754/76484/72393/73750/12501
GO:0010951	GO:0010951	negative regulation of endopeptidase activity	85	-0.323436	-1.31389	0.0802676	0.417087	0.375245	1429	tags=25%, list=15%, signal=21%	20111/12955/22339/67770/12406/11798/20723/109689/20317/13010/17951/21859/17948/67338/110595/15511/236312/13011/20745/17751/22370
GO:0030073	GO:0030073	insulin secretion	144	-0.324426	-1.45063	0.0117435	0.150509	0.13541	2497	tags=35%, list=26%, signal=26%	26921/12361/16181/19055/75597/18747/19015/50790/59090/20913/116838/16973/18012/13350/18754/15251/12889/16367/20866/11481/19339/66259/54525/28240/214597/12289/68667/109689/16522/21844/18642/207227/18575/27060/18693/14645/18576/16438/19662/53357/215999/22063/56406/60510/20614/217166/26875/56508/26950/20304
GO:0099537	GO:0099537	trans-synaptic signaling	438	-0.324561	-1.65713	1.40674e-06	0.000471165	0.000423899	2067	tags=32%, list=22%, signal=26%	116838/20910/57138/78808/20619/16974/20616/68404/17257/27204/27062/109880/20853/26431/12286/76089/81907/18754/224860/14406/12889/12300/20430/19262/23945/381979/110891/77531/77116/108013/20965/11941/108030/94190/19339/22433/12323/20615/70510/12890/231637/223435/54525/20807/26419/232370/13051/72961/16440/227120/208898/64652/13542/230235/64051/70546/66082/13017/110532/107723/22318/319984/207227/1950…
GO:0002706	GO:0002706	regulation of lymphocyte mediated immunity	112	-0.325177	-1.37507	0.0310443	0.255265	0.229657	1226	tags=23%, list=13%, signal=20%	17131/68667/20723/21355/93694/225888/329260/12229/12946/73747/19294/18950/105855/12520/17057/16002/12053/15007/26365/74048/15042/225825/16768/18762/54698/16197
GO:0034767	GO:0034767	positive regulation of monoatomic ion transmembrane transport	95	-0.325351	-1.34787	0.0574324	0.364232	0.327693	2461	tags=38%, list=26%, signal=28%	15980/13483/19055/68943/13844/19204/12568/11977/432442/16485/109676/12293/69179/24012/20544/12300/20866/77574/234779/12289/13040/12335/15165/16518/57816/11555/65973/11931/11932/22063/18823/69810/18669/16502/11554/12298
GO:0060627	GO:0060627	regulation of vesicle-mediated transport	385	-0.32644	-1.65344	5.9096e-06	0.00129086	0.00116137	2293	tags=32%, list=24%, signal=26%	20405/106522/19204/12568/18783/20983/20979/236266/18750/14159/19271/71770/116838/20910/11765/78808/20619/233489/140780/20616/27062/109880/227541/14129/16337/26431/12286/216190/15368/18195/12889/76686/56807/77116/94190/19339/12475/73178/20615/71732/12890/56632/54525/18806/12488/74205/227738/227333/16416/16190/235574/22339/234779/102866/60595/72961/213326/13631/18717/13542/22038/70546/109689/234593…
GO:0050900	GO:0050900	leukocyte migration	225	-0.327185	-1.56422	0.000804343	0.0313257	0.0281832	1852	tags=25%, list=19%, signal=21%	75458/14595/19252/74748/17101/18613/13609/56744/16403/98365/16170/54371/73178/20306/277360/19277/13482/28240/16416/22339/13051/57781/18708/68667/12642/380916/70839/74006/321019/105855/12520/11501/12978/215999/67374/14537/19242/11542/20345/20315/18600/270152/16456/13618/102103/16409/12986/20305/54698/319430/20343/12490/12775/114332/11815/12458/20304
GO:0030183	GO:0030183	B cell differentiation	107	-0.327219	-1.38104	0.0472175	0.334034	0.300524	2425	tags=38%, list=25%, signal=29%	12611/234069/19255/320940/15242/16969/17305/19271/268564/227525/11920/328572/224860/74748/101142/18987/16453/22433/24099/15900/13482/22778/16431/234779/18708/16848/22780/16019/27060/16205/12229/12193/18950/321019/105855/74039/16331/18018/18129/12053/21940
GO:0099536	GO:0099536	synaptic signaling	458	-0.328141	-1.68075	6.93864e-07	0.000364097	0.000327571	2067	tags=32%, list=22%, signal=26%	116838/20910/57138/78808/20619/16974/20616/68404/17257/27204/27062/109880/20853/26431/12286/76089/81907/18754/224860/14406/12889/12300/20430/19262/20866/23945/381979/110891/77531/77116/108013/20965/11941/108030/94190/19339/22433/12323/20615/70510/12890/231637/17069/223435/54525/20807/26419/232370/13051/72961/16440/227120/208898/64652/13542/230235/64051/70546/66082/13017/110532/107723/22318/319984…
GO:0042391	GO:0042391	regulation of membrane potential	231	-0.329214	-1.57873	0.000534771	0.0271383	0.0244158	1883	tags=29%, list=20%, signal=24%	110876/12286/72759/16490/81907/18754/14406/20544/12300/52882/110891/77116/72745/108013/231637/20273/20266/170731/14718/72961/12289/17131/68667/103172/192287/13542/53321/14676/83997/16522/52150/15165/235086/16518/74011/12404/68867/16508/11555/210741/18213/243725/11931/242662/14802/11932/17762/14811/19242/17260/13385/241770/58802/16531/56216/382056/224617/18762/26875/56508/116837/70729/14403/14394/…
GO:0007265	GO:0007265	Ras protein signal transduction	217	-0.32947	-1.57348	0.000605166	0.029518	0.0265568	2062	tags=31%, list=21%, signal=25%	20662/19732/26554/320484/233046/13860/26431/241308/76089/20262/20401/18613/54366/108155/20430/24064/140580/19878/94190/244418/102442/320271/56289/170731/93840/320404/66922/50884/69632/64652/54153/72399/109689/228998/21844/30955/100169/232227/16706/241694/69288/83767/240168/75083/19769/228850/70497/14766/170758/245666/213438/18129/12053/69601/11855/246710/269608/213498/217944/17207/74769/16456/330…
GO:0050714	GO:0050714	positive regulation of protein secretion	110	-0.329502	-1.39947	0.0180083	0.186556	0.167841	1839	tags=26%, list=19%, signal=22%	328572/18754/15251/20866/66259/11785/12488/28240/269800/12289/68667/109689/18642/14645/209630/74006/16438/19662/53357/360013/215999/22063/56406/56513/80885/320051/56508/26950/11554
GO:0007596	GO:0007596	blood coagulation	91	-0.329674	-1.35505	0.0554622	0.361403	0.325148	1156	tags=22%, list=12%, signal=20%	18717/192232/233405/12495/16194/70839/11555/17289/16923/12628/26365/54368/74769/16456/74145/19128/26570/22174/12490/22370
GO:0050796	GO:0050796	regulation of insulin secretion	120	-0.329998	-1.41695	0.0154119	0.172065	0.154804	2497	tags=34%, list=26%, signal=26%	26921/12361/19055/75597/18747/19015/50790/59090/20913/16973/18754/15251/16367/20866/66259/54525/28240/214597/12289/68667/109689/16522/21844/18642/207227/18575/27060/18693/14645/18576/16438/19662/53357/215999/22063/56406/60510/217166/56508/26950/20304
GO:0071248	GO:0071248	cellular response to metal ion	98	-0.330168	-1.37581	0.0466667	0.332087	0.298772	3304	tags=58%, list=34%, signal=39%	15444/14281/18023/19122/14102/22041/11735/14268/53945/20617/58994/15499/241066/12912/18013/13605/232341/59125/16477/11513/20983/11977/20979/16485/16476/16478/18021/17257/109880/22042/12606/98396/15368/233908/70568/66972/54525/26419/320404/28240/234779/11690/54153/17764/94178/12335/80976/17258/65973/18164/20597/14811/17260/13385/20980/60510/17751
GO:0030534	GO:0030534	adult behavior	96	-0.330353	-1.36757	0.049236	0.342132	0.30781	832	tags=16%, list=9%, signal=14%	21916/224671/239102/20511/17762/18190/80297/20315/16531/76965/57754/26570/18191/98660/12298
GO:0006887	GO:0006887	exocytosis	235	-0.330441	-1.58987	0.000548937	0.0275786	0.024812	2394	tags=34%, list=25%, signal=26%	14158/76707/18704/16414/20336/18747/19204/12568/20983/20979/18750/14159/67495/116838/20910/11765/78808/20619/27062/109880/26431/12286/15368/18195/102058/12889/56807/67727/20965/108030/19339/20615/71732/109658/12890/56632/54525/18806/194401/16190/208898/18717/13542/64051/13017/56743/80976/75914/22318/207227/320405/12229/76499/74006/105855/70497/53357/20977/16897/242662/18479/11542/241770/20980/605…
GO:0002793	GO:0002793	positive regulation of peptide secretion	75	-0.330682	-1.30618	0.0938567	0.441513	0.397221	1831	tags=27%, list=19%, signal=22%	18754/54126/15251/16367/20866/66259/28240/12289/68667/109689/18642/14645/16438/19662/53357/215999/22063/56406/56508/26950
GO:0090277	GO:0090277	positive regulation of peptide hormone secretion	75	-0.330682	-1.30618	0.0938567	0.441513	0.397221	1831	tags=27%, list=19%, signal=22%	18754/54126/15251/16367/20866/66259/28240/12289/68667/109689/18642/14645/16438/19662/53357/215999/22063/56406/56508/26950
GO:1990138	GO:1990138	neuron projection extension	141	-0.330945	-1.47218	0.0070576	0.108153	0.0973031	2388	tags=34%, list=25%, signal=26%	17136/27103/239667/20351/213084/12568/12168/12934/20983/20979/116838/233489/68404/17257/20403/81907/328572/243743/20430/23945/11426/29869/18786/20807/22339/14567/13542/171207/21844/54214/76499/382253/83767/18213/12978/17762/18479/12774/20980/20315/330914/17984/319740/18762/26456/20404/116837/17751
GO:0042100	GO:0042100	B cell proliferation	64	-0.331216	-1.27463	0.122776	0.493066	0.443602	964	tags=22%, list=10%, signal=20%	22780/16019/227059/12229/321019/105855/12520/16331/22084/12053/17260/243958/21940/16197
GO:0002573	GO:0002573	myeloid leukocyte differentiation	162	-0.331467	-1.51384	0.0061238	0.100977	0.0908471	3223	tags=47%, list=34%, signal=32%	245944/98386/22041/56637/17096/26416/18032/12608/18015/14628/12192/210710/16842/14815/21950/20308/15499/17684/12912/17869/14389/11820/21813/216161/19055/19255/107173/16477/15242/16969/18750/14159/12326/16476/12398/12349/17342/22042/12606/16364/21934/381319/215653/233328/100201/22778/16416/22339/12394/75302/18708/170826/16658/68027/72147/93694/224109/27060/19766/321019/12520/57816/234515/11501/163…
GO:0008217	GO:0008217	regulation of blood pressure	77	-0.331472	-1.31755	0.0814941	0.420768	0.378557	1498	tags=29%, list=16%, signal=24%	66259/19277/72461/18708/69632/64652/78286/52150/19224/235431/11555/13805/17423/54409/52589/16456/230857/13618/56485/98660/12490/11554
GO:1903039	GO:1903039	positive regulation of leukocyte cell-cell adhesion	175	-0.331978	-1.52947	0.00351749	0.0806934	0.0725984	982	tags=21%, list=10%, signal=19%	54371/22433/24099/74734/13482/320404/16190/107527/12394/16362/19697/83796/18950/81601/105855/12520/67155/11501/16002/12053/17973/12519/14537/63953/74048/18106/16195/15001/69165/21940/18762/15002/16008/12775/12501/16197/20304
GO:0007268	GO:0007268	chemical synaptic transmission	434	-0.332306	-1.69587	1.92679e-06	0.000545876	0.000491114	2067	tags=32%, list=22%, signal=26%	116838/20910/57138/78808/20619/16974/20616/68404/17257/27204/27062/109880/20853/26431/12286/76089/81907/18754/224860/14406/12889/12300/20430/19262/23945/381979/110891/77531/77116/108013/20965/11941/108030/94190/19339/22433/12323/20615/70510/12890/231637/223435/54525/20807/26419/232370/13051/72961/16440/227120/208898/64652/13542/230235/64051/70546/66082/13017/110532/107723/22318/319984/207227/1950…
GO:0098916	GO:0098916	anterograde trans-synaptic signaling	434	-0.332306	-1.69587	1.92679e-06	0.000545876	0.000491114	2067	tags=32%, list=22%, signal=26%	116838/20910/57138/78808/20619/16974/20616/68404/17257/27204/27062/109880/20853/26431/12286/76089/81907/18754/224860/14406/12889/12300/20430/19262/23945/381979/110891/77531/77116/108013/20965/11941/108030/94190/19339/22433/12323/20615/70510/12890/231637/223435/54525/20807/26419/232370/13051/72961/16440/227120/208898/64652/13542/230235/64051/70546/66082/13017/110532/107723/22318/319984/207227/1950…
GO:0007611	GO:0007611	learning or memory	188	-0.33274	-1.54783	0.00126776	0.0447071	0.0402222	2483	tags=38%, list=26%, signal=29%	23829/16181/12752/238871/27103/13844/432572/54720/106763/12568/20983/12227/18750/12326/16476/57138/233489/17257/109880/110876/328572/15572/108012/15251/72108/381979/110891/66259/259277/20807/13051/72961/16440/68667/16835/224938/234593/20317/319984/11980/54006/195018/19224/18574/224671/50876/16002/11555/53357/268934/260297/208922/218038/17762/20393/18479/14811/18190/19242/17260/12307/23821/432530/…
GO:0042129	GO:0042129	regulation of T cell proliferation	117	-0.333072	-1.41683	0.0174413	0.18518	0.166603	799	tags=17%, list=8%, signal=16%	18950/105855/12520/16002/22084/12053/17973/12519/229473/26365/74048/18106/16195/69165/54698/16008/20555/12775/12501/20304
GO:0045664	GO:0045664	regulation of neuron differentiation	118	-0.333092	-1.42171	0.0180915	0.186636	0.167913	688	tags=15%, list=7%, signal=14%	239102/170758/12053/11906/330938/320705/668253/18222/12774/30957/18514/17260/243937/20315/58198/13618/18546/20304
GO:1904064	GO:1904064	positive regulation of cation transmembrane transport	76	-0.333258	-1.31834	0.0775862	0.410889	0.369669	2252	tags=37%, list=23%, signal=28%	13483/19055/12568/432442/16485/109676/12293/69179/24012/20544/20866/234779/12289/13040/12335/15165/16518/57816/11555/65973/11931/11932/22063/18823/69810/16502/11554/12298
GO:0009612	GO:0009612	response to mechanical stimulus	78	-0.334255	-1.33023	0.0733788	0.404227	0.363676	624	tags=17%, list=6%, signal=16%	20512/18763/207728/18190/19242/20315/14009/23821/16456/98660/73750/12842/50769
GO:0006813	GO:0006813	potassium ion transport	101	-0.334653	-1.39965	0.0269919	0.232204	0.20891	1259	tags=25%, list=13%, signal=22%	72961/12289/16519/16522/52150/107723/22318/15165/16518/18693/83704/70839/16508/11555/20512/210741/16504/11931/11932/58802/16531/16506/80334/16502/98660
GO:0051056	GO:0051056	regulation of small GTPase mediated signal transduction	150	-0.335224	-1.51731	0.00453433	0.0911218	0.0819806	2062	tags=31%, list=21%, signal=24%	20662/19732/26554/320484/233046/13860/26431/241308/20262/20401/108155/24064/94190/244418/102442/320271/170731/12488/20469/320404/54153/109689/228998/74206/30955/232227/244668/241694/228850/99326/70497/14766/245666/22084/213438/75415/18129/12053/69601/217692/17207/74769/16456/234353/260299/71302
GO:0005976	GO:0005976	polysaccharide metabolic process	62	-0.335456	-1.2856	0.116071	0.485144	0.436475	2207	tags=37%, list=23%, signal=29%	18591/83398/53625/77559/15531/56336/11364/110078/16337/244416/16367/12421/110094/68961/18642/19062/58200/16002/108099/17423/16195/217166/11554
GO:0035710	GO:0035710	CD4-positive, alpha-beta T cell activation	85	-0.335902	-1.36453	0.0568562	0.36348	0.327016	2523	tags=38%, list=26%, signal=28%	15284/208650/20185/21813/16396/20351/207952/11977/93685/109880/16364/20852/319817/16453/16190/12394/17131/16362/27060/16205/16194/233912/321019/105855/12520/17085/12053/74048/18762/12775/72310/12501
GO:1902105	GO:1902105	regulation of leukocyte differentiation	225	-0.336323	-1.6079	0.000386029	0.0216976	0.0195209	2376	tags=34%, list=25%, signal=26%	234069/93760/19255/320940/107173/14000/207952/16818/16969/18750/14159/16476/12349/268564/17342/20662/228361/21946/109880/12142/74748/319817/215653/83766/16453/22433/74734/320404/100201/22778/16416/16190/107527/12394/75302/18708/17131/170826/16658/68027/72147/93694/16362/22780/83796/19766/12193/18950/81601/269023/105855/57816/234515/67155/11501/74039/16331/50754/18129/12978/12053/16923/229473/6395…
GO:1902106	GO:1902106	negative regulation of leukocyte differentiation	65	-0.33659	-1.30072	0.108772	0.470045	0.422891	1361	tags=28%, list=14%, signal=24%	16190/12394/18708/17131/16658/68027/72147/93694/16362/269023/234515/16331/50754/12053/229473/26365/18725/16768
GO:0046467	GO:0046467	membrane lipid biosynthetic process	79	-0.336698	-1.3425	0.0635739	0.380232	0.342088	2305	tags=34%, list=24%, signal=26%	68801/14731/27392/56336/77626/18753/67260/56386/66612/56632/57370/55981/228812/241447/67630/68059/22234/66190/230801/20452/53357/208449/16007/20441/20597/20444/54613
GO:0007159	GO:0007159	leukocyte cell-cell adhesion	254	-0.337349	-1.62829	0.00018825	0.0143298	0.0128923	992	tags=17%, list=10%, signal=16%	54607/16362/19697/83796/18950/81601/269023/105855/12520/67155/11501/16002/22084/12053/17973/12519/67374/14537/229473/63953/12628/26365/74048/20345/18106/20315/94212/16195/16456/15001/69165/16768/21940/16409/18762/15002/54698/20343/16008/20555/12775/12501/16197/20304
GO:0046031	GO:0046031	ADP metabolic process	67	-0.337699	-1.30648	0.107965	0.469277	0.4222	2555	tags=40%, list=27%, signal=30%	23959/11820/20185/54403/56421/11674/18747/15275/16969/12398/13807/16337/328572/15251/108155/74747/66129/72141/212032/12495/18642/15277/11636/17425/108099/58805/11676
GO:0050806	GO:0050806	positive regulation of synaptic transmission	114	-0.337755	-1.43306	0.0229872	0.210744	0.189602	1270	tags=25%, list=13%, signal=22%	232370/13051/16440/70546/22318/14645/74006/268755/20512/245666/243725/260297/208922/242662/14802/18479/14811/19242/12307/13385/241770/432530/20614/56216/12308/382056/18762/116837/11554
GO:0043087	GO:0043087	regulation of GTPase activity	247	-0.338895	-1.63811	0.000343601	0.0205425	0.0184817	2065	tags=31%, list=21%, signal=25%	17850/18845/216445/14697/20662/20303/233489/24012/381085/218397/320484/233046/241308/76089/20262/213990/54126/20401/13196/243743/18613/13609/16403/24064/319934/20306/277360/20469/216991/54153/19765/70719/544817/271981/109689/72238/21844/74206/380916/71310/329260/29809/227800/232227/244668/382253/69993/241694/240168/226089/228850/99326/13543/18213/170625/22084/75415/12053/67016/77980/69601/72278/2…
GO:1903706	GO:1903706	regulation of hemopoiesis	277	-0.339003	-1.6545	8.11905e-05	0.00784425	0.00705733	2376	tags=33%, list=25%, signal=25%	234069/93760/19255/320940/107173/14000/207952/16818/16969/18750/14159/16476/12349/268564/17342/20662/228361/78783/21946/53621/109880/12606/12142/74748/15251/319817/215653/83766/16453/22433/74734/16909/320404/100201/22778/16416/16190/107527/68235/12394/75302/18708/17131/170826/16658/68027/72147/93694/16362/22780/83796/229700/19766/12193/18950/81601/269023/105855/57816/234515/67155/11501/67017/7403…
GO:0014909	GO:0014909	smooth muscle cell migration	71	-0.339396	-1.33327	0.0865874	0.429402	0.386325	376	tags=20%, list=4%, signal=19%	231637/16416/14180/234593/414758/238130/18479/17260/16195/11504/353156/56508/22370/20304
GO:0008277	GO:0008277	regulation of G protein-coupled receptor signaling pathway	76	-0.339467	-1.34291	0.0655172	0.386961	0.348142	1885	tags=32%, list=20%, signal=26%	26431/12952/23945/19878/12323/74270/18806/16416/109689/66082/67298/12121/50876/105171/11555/239217/23984/20977/64214/54409/230857/13429/11554/20304
GO:0071675	GO:0071675	regulation of mononuclear cell migration	78	-0.33999	-1.35305	0.0614334	0.375476	0.337809	666	tags=19%, list=7%, signal=18%	73178/20306/16416/13051/57781/380916/11501/12978/67374/20315/18600/12775/11815/12458/20304
GO:0045621	GO:0045621	positive regulation of lymphocyte differentiation	97	-0.340462	-1.41363	0.0182602	0.187491	0.168682	1535	tags=22%, list=16%, signal=18%	22433/74734/320404/16190/107527/12394/16362/83796/18950/81601/105855/67155/11501/16331/12053/63953/74048/21940/18762/12775/16197
GO:0070665	GO:0070665	positive regulation of leukocyte proliferation	108	-0.341986	-1.44705	0.0152379	0.170609	0.153494	948	tags=19%, list=10%, signal=17%	16019/227059/12229/18950/321019/105855/12520/16002/12978/12053/17973/12519/17260/18106/16195/69165/16008/12775/12501/20304
GO:0090630	GO:0090630	activation of GTPase activity	66	-0.34289	-1.32549	0.109929	0.472846	0.42541	1131	tags=24%, list=12%, signal=22%	70719/271981/72238/21844/74206/71310/29809/244668/241694/228850/99326/18213/67016/239027/217692/100855
GO:0006897	GO:0006897	endocytosis	376	-0.343779	-1.73239	3.19144e-07	0.00026723	0.000240422	2572	tags=38%, list=27%, signal=29%	74325/94176/74030/11820/27373/12725/21813/12752/237253/269774/19055/214854/11845/51801/13367/18704/16414/20405/210376/12568/242687/12934/20983/19334/104215/20979/236266/18750/64933/217030/71770/109676/233489/140780/16973/16974/20616/22042/20403/14129/16337/216190/81907/20401/18195/252972/76686/12300/56807/50771/77116/140580/94190/12475/73178/74270/140792/54525/18806/12488/227738/227333/16416/2233…
GO:0016052	GO:0016052	carbohydrate catabolic process	98	-0.344211	-1.43433	0.0253085	0.225044	0.202468	2547	tags=39%, list=26%, signal=29%	15931/11820/11881/20185/54403/56421/11674/78830/18747/15275/16969/77559/12398/110078/17939/13807/16337/244416/17160/328572/15251/108155/12421/74747/68961/66129/72141/212032/18642/15212/74245/15277/17425/108099/58805/15483/11676/11554
GO:0002685	GO:0002685	regulation of leukocyte migration	139	-0.344229	-1.52727	0.00473496	0.0926885	0.0833901	1570	tags=22%, list=16%, signal=19%	54371/73178/20306/13482/16416/22339/13051/57781/18708/380916/70839/74006/105855/12520/11501/12978/215999/67374/14537/19242/11542/20315/18600/102103/319430/20343/12775/114332/11815/12458/20304
GO:0006820	GO:0006820	monoatomic anion transport	59	-0.345013	-1.30759	0.0964286	0.445972	0.401233	1401	tags=25%, list=15%, signal=22%	77574/12728/72961/241296/107723/229725/19766/83704/20512/20511/57776/18669/14403/14394/14399
GO:0015749	GO:0015749	monosaccharide transmembrane transport	66	-0.34637	-1.33894	0.101064	0.454094	0.40854	2192	tags=39%, list=23%, signal=31%	104215/18750/102193/20913/218397/20167/109880/16337/216190/18753/76686/16367/170731/20525/52906/74011/15277/22612/11636/19062/20661/17258/20511/56017/22084/56485
GO:0007219	GO:0007219	Notch signaling pathway	100	-0.346734	-1.44734	0.0150366	0.17019	0.153117	2565	tags=41%, list=27%, signal=30%	67888/11820/67661/21813/269774/319594/80904/15242/16969/17305/224143/140780/17257/12606/19245/57750/244418/14718/56381/67694/16848/76580/109689/215705/229700/75745/13855/103806/50754/18129/18011/12053/16897/320705/18222/433586/16195/110595/69068/353156/270118
GO:0031109	GO:0031109	microtubule polymerization or depolymerization	99	-0.346857	-1.44729	0.0192676	0.192407	0.173105	2151	tags=32%, list=22%, signal=25%	246103/14159/13191/328108/230101/17257/74392/15185/20262/51885/54126/76686/29877/26419/12955/56430/214444/233276/17318/76499/100732/76789/13548/193740/17762/20393/72948/18479/22153/260315/14544/15511
GO:0050870	GO:0050870	positive regulation of T cell activation	160	-0.347323	-1.5783	0.0013574	0.0462819	0.041639	799	tags=21%, list=8%, signal=20%	22433/24099/74734/13482/320404/16190/107527/12394/16362/83796/18950/81601/105855/12520/67155/11501/16002/12053/17973/12519/63953/74048/18106/16195/15001/69165/21940/18762/15002/16008/12775/12501/16197/20304
GO:0007264	GO:0007264	small GTPase mediated signal transduction	281	-0.348318	-1.7024	1.79971e-05	0.0029381	0.00264335	1947	tags=31%, list=20%, signal=25%	320484/233046/13860/26431/241308/76089/15368/20262/54126/20401/18613/54366/108155/20430/24064/140580/19878/94190/244418/102442/320271/74734/56289/170731/93840/12488/20469/320404/66922/50884/69632/68339/14567/64652/54153/98710/19765/72399/109689/228998/21844/74206/30955/100169/232227/16706/244668/241694/69288/83767/238130/240168/75083/19769/228850/99326/70497/11852/14766/170758/245666/22084/213438…
GO:0009636	GO:0009636	response to toxic substance	63	-0.348378	-1.33935	0.0846561	0.426164	0.383412	1758	tags=25%, list=18%, signal=21%	15251/19106/18230/20273/140742/20266/26357/19765/17196/13849/243725/11863/26570/18669/17751/20304
GO:0034219	GO:0034219	carbohydrate transmembrane transport	68	-0.349405	-1.35337	0.0719298	0.402423	0.362052	2192	tags=40%, list=23%, signal=31%	104215/18750/102193/20913/218397/20167/109880/16337/216190/18753/76686/16367/70652/170731/20525/52906/74011/15277/22612/11636/19062/20661/17258/20511/56017/22084/56485
GO:0008344	GO:0008344	adult locomotory behavior	66	-0.349413	-1.3507	0.0886525	0.432418	0.389038	2539	tags=33%, list=26%, signal=25%	11820/12725/227331/18858/67269/17257/12799/13860/12661/12286/98685/233878/20273/21916/224671/17762/80297/20315/16531/57754/98660/12298
GO:0071674	GO:0071674	mononuclear cell migration	118	-0.350022	-1.49398	0.00861827	0.123357	0.110982	2106	tags=29%, list=22%, signal=23%	17470/19271/20303/13860/75458/19252/74748/18613/13609/98365/73178/20306/19277/28240/16416/13051/57781/68667/12642/380916/321019/11501/12978/67374/20315/18600/270152/16456/20305/54698/12775/11815/12458/20304
GO:0008645	GO:0008645	hexose transmembrane transport	65	-0.351248	-1.35736	0.0859649	0.428886	0.38586	2192	tags=40%, list=23%, signal=31%	104215/18750/102193/20913/218397/20167/109880/16337/216190/18753/76686/16367/170731/20525/52906/74011/15277/22612/11636/19062/20661/17258/20511/56017/22084/56485
GO:1904659	GO:1904659	glucose transmembrane transport	65	-0.351248	-1.35736	0.0859649	0.428886	0.38586	2192	tags=40%, list=23%, signal=31%	104215/18750/102193/20913/218397/20167/109880/16337/216190/18753/76686/16367/170731/20525/52906/74011/15277/22612/11636/19062/20661/17258/20511/56017/22084/56485
GO:0030595	GO:0030595	leukocyte chemotaxis	133	-0.351595	-1.54701	0.00317188	0.0769833	0.0692604	1852	tags=28%, list=19%, signal=23%	75458/19252/74748/17101/13609/56744/98365/16170/20306/277360/19277/13482/28240/22339/13051/68667/12642/74006/321019/105855/11501/12978/215999/19242/20315/18600/270152/13618/102103/16409/12986/20305/319430/20343/12775/12458/20304
GO:0006898	GO:0006898	receptor-mediated endocytosis	176	-0.352033	-1.62432	0.000569291	0.028318	0.0254772	2011	tags=30%, list=21%, signal=24%	233489/140780/16974/20616/22042/20403/14129/16337/81907/18195/12300/77116/94190/12475/73178/18806/12488/227333/16416/22339/234779/213326/218503/16835/18717/544817/109689/17533/52906/72238/18693/232227/83767/12121/12520/11555/108086/50791/26365/18222/13385/54409/103967/233274/20614/268445/16409/20404/13429/23969/12775/114332/22370
GO:0001906	GO:0001906	cell killing	98	-0.352147	-1.4674	0.0195736	0.19282	0.173476	1135	tags=21%, list=12%, signal=19%	20723/21355/93694/12946/19294/18950/105855/17057/16002/20301/15007/12628/26365/20315/15042/225825/16768/16409/54698/72310/16197
GO:0071805	GO:0071805	potassium ion transmembrane transport	84	-0.352393	-1.42418	0.0275426	0.23533	0.211722	1249	tags=26%, list=13%, signal=23%	12289/16519/16522/52150/107723/22318/15165/16518/18693/83704/70839/16508/20512/210741/16504/11931/11932/16531/16506/80334/16502/98660
GO:1901222	GO:1901222	regulation of NIK/NF-kappaB signaling	62	-0.352676	-1.35159	0.075	0.408677	0.367679	1875	tags=31%, list=20%, signal=25%	13205/328572/171285/319817/215653/19106/18569/19245/12475/60595/19697/170743/11796/236511/268857/11797/214150/69068/67445
GO:0030168	GO:0030168	platelet activation	61	-0.353175	-1.34791	0.0765125	0.410889	0.369669	2244	tags=39%, list=23%, signal=30%	21682/18783/18750/19271/20910/18753/56744/20807/16416/18717/233405/12495/16194/70839/11555/17289/16923/12628/26365/54368/74769/16456/26570/22174
GO:0071887	GO:0071887	leukocyte apoptotic process	95	-0.354198	-1.46737	0.0150366	0.17019	0.153117	1244	tags=21%, list=13%, signal=19%	22163/20723/50996/227059/19766/18950/11501/14605/17289/12774/17260/20315/170770/74769/26570/21940/16409/12775/16197/20304
GO:0050921	GO:0050921	positive regulation of chemotaxis	80	-0.354442	-1.41814	0.020482	0.196752	0.177014	1594	tags=24%, list=17%, signal=20%	16170/73178/68606/20306/22339/13051/21844/70839/74006/105855/18213/12978/215999/19242/20315/20343/12775/12458/20304
GO:0051928	GO:0051928	positive regulation of calcium ion transport	68	-0.355647	-1.37755	0.0631579	0.380006	0.341885	2072	tags=32%, list=22%, signal=26%	109676/12293/69179/20544/20866/16453/11941/56632/234779/12289/12335/16438/11555/65973/11931/22063/18823/20315/69810/11554/12298/20304
GO:0045453	GO:0045453	bone resorption	48	-0.356485	-1.29997	0.115993	0.485144	0.436475	2322	tags=42%, list=24%, signal=32%	107173/18750/12349/16974/22042/21934/13609/233328/100201/16416/22339/170826/13040/27060/11501/11555/16331/231633/12978/26365
GO:0010469	GO:0010469	regulation of signaling receptor activity	75	-0.356643	-1.40872	0.0233602	0.212227	0.190937	1272	tags=28%, list=13%, signal=24%	74155/59016/380686/225849/67296/18693/435145/224997/21802/12121/11555/50754/18011/260297/18164/14811/18190/17260/13385/19894/50932
GO:0048167	GO:0048167	regulation of synaptic plasticity	152	-0.358245	-1.62447	0.00140208	0.0469603	0.0422494	1687	tags=31%, list=18%, signal=26%	23945/381979/110891/11941/19339/12323/12890/231637/54525/20807/13051/16440/208898/70546/66082/22318/319984/195018/18693/435145/268755/12404/245666/18011/20977/243725/260297/208922/217692/242662/17762/18479/14811/19242/17260/12307/13385/241770/23821/432530/20614/57340/12308/382056/18762/116837/11554
GO:0007186	GO:0007186	G protein-coupled receptor signaling pathway	278	-0.358663	-1.74804	5.83792e-06	0.00129086	0.00116137	2120	tags=34%, list=22%, signal=27%	70693/102193/12349/116838/14697/16801/26364/20303/73010/24012/18797/58861/16337/26431/76089/12952/99633/13609/52882/20866/23945/18749/14704/54199/19878/12323/20306/74270/277360/18806/227333/16416/74191/13051/69632/12289/16440/13139/109689/14676/66082/12495/19697/30955/18693/67298/70839/12121/321019/19062/50876/16438/105171/20661/11555/14766/239217/23984/213438/268934/20977/64214/83397/14366/32020…
GO:0007188	GO:0007188	adenylate cyclase-modulating G protein-coupled receptor signaling pathway	72	-0.358842	-1.40385	0.0390074	0.297558	0.267708	2539	tags=40%, list=26%, signal=30%	11820/27374/14677/51801/18747/11513/116838/26364/76089/99633/13609/18749/16416/12289/14676/70839/105171/11555/14766/23984/268934/83397/207728/54409/432530/11515/56508/242425/11554
GO:0007266	GO:0007266	Rho protein signal transduction	74	-0.359168	-1.41621	0.0284302	0.240056	0.215974	1749	tags=30%, list=18%, signal=25%	18613/54366/19878/94190/244418/320271/93840/69632/109689/100169/69288/14766/213438/12053/11855/246710/269608/213498/17207/16456/330914/11554
GO:0051588	GO:0051588	regulation of neurotransmitter transport	70	-0.361161	-1.41466	0.0428816	0.317286	0.285457	2283	tags=54%, list=24%, signal=42%	14265/269642/18015/20617/29873/228545/72194/20964/12361/67760/20983/20979/18750/116838/20910/78808/109880/26431/12286/12889/19339/20615/12890/16416/13542/207227/74006/14758/16504/20977/243725/242662/17260/241770/56216/213760/116837/12298
GO:0051208	GO:0051208	sequestering of calcium ion	71	-0.361743	-1.42105	0.0424448	0.315448	0.283803	2198	tags=32%, list=23%, signal=25%	16818/108837/109676/18797/56384/18754/66972/28240/16416/234779/94178/12335/16438/65973/16439/12774/22063/54368/170770/57340/18796/69810/269615
GO:0032418	GO:0032418	lysosome localization	63	-0.363333	-1.39685	0.0634921	0.380196	0.342055	2702	tags=40%, list=28%, signal=29%	70450/14389/16561/219024/14158/14159/20910/20619/15368/15185/71900/19339/20615/70510/12890/56632/18806/16190/14533/233405/56743/12229/11542/19215/16594
GO:1990849	GO:1990849	vacuolar localization	63	-0.363333	-1.39685	0.0634921	0.380196	0.342055	2702	tags=40%, list=28%, signal=29%	70450/14389/16561/219024/14158/14159/20910/20619/15368/15185/71900/19339/20615/70510/12890/56632/18806/16190/14533/233405/56743/12229/11542/19215/16594
GO:0001776	GO:0001776	leukocyte homeostasis	93	-0.363768	-1.50219	0.00992898	0.133378	0.119997	1758	tags=26%, list=18%, signal=21%	15251/319817/16453/108156/24099/320404/20482/22163/27060/12229/321019/105855/14605/17289/12978/16923/12628/78591/17260/74769/16151/26570/16409/16197
GO:0008306	GO:0008306	associative learning	58	-0.366265	-1.37938	0.0661896	0.388024	0.349098	2953	tags=48%, list=31%, signal=34%	18015/20320/15932/353342/12912/18013/11820/12752/432572/12568/12227/17257/109880/108012/15251/72108/381979/20807/234593/54006/195018/18574/11555/20393/14811/20614/26570/98660
GO:0090311	GO:0090311	regulation of protein deacetylation	46	-0.366877	-1.32646	0.10087	0.454094	0.40854	2993	tags=52%, list=31%, signal=36%	18854/81703/71175/114715/20185/114716/68943/69260/99890/101206/217031/328572/80748/219158/320365/56632/22339/54194/13548/12053/56399/17762/72948/17984
GO:0051283	GO:0051283	negative regulation of sequestering of calcium ion	68	-0.367048	-1.42171	0.045614	0.326492	0.293738	1370	tags=35%, list=14%, signal=30%	238871/13367/16818/108837/109676/18797/56384/18754/28240/16416/234779/94178/12335/16438/65973/16439/12774/22063/54368/170770/57340/18796/69810/269615
GO:0097479	GO:0097479	synaptic vesicle localization	51	-0.367434	-1.35676	0.0883392	0.431778	0.388462	2252	tags=39%, list=23%, signal=30%	12568/12934/20983/64933/233489/20616/27204/108012/16572/20965/108030/19339/20615/14533/16574/50791/103967/12217/26875/13429
GO:1904427	GO:1904427	positive regulation of calcium ion transmembrane transport	49	-0.367726	-1.34886	0.0923345	0.438272	0.394305	2072	tags=33%, list=22%, signal=26%	109676/12293/69179/20544/20866/234779/12289/12335/11555/65973/11931/22063/18823/69810/11554/12298
GO:0014910	GO:0014910	regulation of smooth muscle cell migration	64	-0.367863	-1.41566	0.0587189	0.367337	0.330486	376	tags=12%, list=4%, signal=12%	18479/17260/16195/11504/353156/56508/22370/20304
GO:0044264	GO:0044264	cellular polysaccharide metabolic process	56	-0.367943	-1.37655	0.0695187	0.396793	0.356987	2207	tags=38%, list=23%, signal=29%	53625/77559/15531/56336/11364/110078/16337/244416/16367/12421/110094/68961/18642/19062/58200/16002/108099/17423/16195/217166/11554
GO:2000106	GO:2000106	regulation of leukocyte apoptotic process	78	-0.368258	-1.46555	0.0134035	0.161064	0.144906	1244	tags=23%, list=13%, signal=20%	22163/20723/50996/227059/18950/11501/14605/17289/12774/17260/20315/170770/74769/26570/21940/12775/16197/20304
GO:0051282	GO:0051282	regulation of sequestering of calcium ion	70	-0.36853	-1.44353	0.0265623	0.230084	0.207002	2198	tags=33%, list=23%, signal=26%	16818/108837/109676/18797/56384/18754/66972/28240/16416/234779/94178/12335/16438/65973/16439/12774/22063/54368/170770/57340/18796/69810/269615
GO:1902414	GO:1902414	protein localization to cell junction	96	-0.369611	-1.53008	0.00581621	0.0996953	0.0896941	1753	tags=32%, list=18%, signal=27%	12889/12300/18613/108155/16572/26414/26419/60595/232370/70546/22318/16574/224997/665113/50791/245666/18164/17762/14811/30957/18190/13385/21872/20614/56216/16456/12217/18762/26875/18191/56508
GO:0006893	GO:0006893	Golgi to plasma membrane transport	45	-0.369982	-1.33353	0.0984456	0.450766	0.405546	2614	tags=49%, list=27%, signal=36%	106572/18777/107371/71517/99371/12752/20336/106522/18195/102058/11426/227648/76688/74205/235574/75914/22318/54214/226744/16897/70829/213760
GO:0030100	GO:0030100	regulation of endocytosis	163	-0.370016	-1.68994	0.000272851	0.0176342	0.0158652	2011	tags=37%, list=21%, signal=30%	20983/236266/18750/71770/233489/140780/20616/14129/16337/216190/18195/76686/56807/77116/94190/12475/73178/54525/18806/12488/227738/227333/16416/22339/234779/60595/72961/213326/13631/18717/109689/228998/52906/72238/16019/18693/232227/224671/74006/12121/105855/12476/233186/13855/83382/108086/50791/22084/71435/218038/20597/18222/13385/268445/100502698/20404/13429/23969/12775/22370
GO:0032946	GO:0032946	positive regulation of mononuclear cell proliferation	98	-0.370209	-1.54266	0.00837409	0.120548	0.108455	948	tags=20%, list=10%, signal=19%	16019/227059/12229/18950/321019/105855/12520/16002/12978/12053/17973/12519/17260/18106/16195/69165/16008/12775/12501/20304
GO:0016239	GO:0016239	positive regulation of macroautophagy	58	-0.372335	-1.40224	0.0572451	0.364119	0.327591	2042	tags=38%, list=21%, signal=30%	76561/17281/68943/209131/228361/56480/18718/15368/225131/15251/108083/140742/227738/15944/74374/11555/54636/170625/22084/16145/16151/13179
GO:0006643	GO:0006643	membrane lipid metabolic process	103	-0.372619	-1.569	0.00380882	0.0835612	0.0751784	2305	tags=37%, list=24%, signal=28%	68801/14731/27392/56336/230101/17939/77626/18753/67260/56386/66612/192654/56632/57370/55981/17761/218442/228812/241447/67630/68059/22234/26943/433323/15212/66190/12916/230801/20452/53357/208449/16007/20441/20597/20444/19012/319660/54613
GO:0003073	GO:0003073	regulation of systemic arterial blood pressure	39	-0.372688	-1.31314	0.125436	0.499037	0.448974	1498	tags=36%, list=16%, signal=30%	66259/19277/72461/78286/52150/235431/11555/13805/17423/52589/230857/13618/56485/11554
GO:1902107	GO:1902107	positive regulation of leukocyte differentiation	136	-0.372782	-1.64388	0.000728779	0.0308393	0.0277456	1535	tags=24%, list=16%, signal=21%	22433/74734/320404/100201/22778/16416/16190/107527/12394/75302/170826/72147/16362/83796/19766/18950/81601/105855/57816/67155/11501/16331/18129/12978/12053/63953/74048/21940/16409/18762/12775/16197/20304
GO:1903708	GO:1903708	positive regulation of hemopoiesis	136	-0.372782	-1.64388	0.000728779	0.0308393	0.0277456	1535	tags=24%, list=16%, signal=21%	22433/74734/320404/100201/22778/16416/16190/107527/12394/75302/170826/72147/16362/83796/19766/18950/81601/105855/57816/67155/11501/16331/18129/12978/12053/63953/74048/21940/16409/18762/12775/16197/20304
GO:0005977	GO:0005977	glycogen metabolic process	47	-0.372948	-1.3536	0.0896309	0.433512	0.390023	2103	tags=36%, list=22%, signal=28%	77559/11364/110078/16337/244416/16367/12421/110094/68961/18642/19062/58200/16002/108099/16195/217166/11554
GO:0006073	GO:0006073	cellular glucan metabolic process	47	-0.372948	-1.3536	0.0896309	0.433512	0.390023	2103	tags=36%, list=22%, signal=28%	77559/11364/110078/16337/244416/16367/12421/110094/68961/18642/19062/58200/16002/108099/16195/217166/11554
GO:0044042	GO:0044042	glucan metabolic process	47	-0.372948	-1.3536	0.0896309	0.433512	0.390023	2103	tags=36%, list=22%, signal=28%	77559/11364/110078/16337/244416/16367/12421/110094/68961/18642/19062/58200/16002/108099/16195/217166/11554
GO:0032608	GO:0032608	interferon-beta production	42	-0.373342	-1.31738	0.106007	0.467001	0.420152	3529	tags=60%, list=37%, signal=38%	19247/19696/24088/19261/13211/70428/15975/15519/142980/67065/71586/56480/78781/13205/54123/215243/16362/170743/54131/108086/70408/268857/218832/74019/384309
GO:0032648	GO:0032648	regulation of interferon-beta production	42	-0.373342	-1.31738	0.106007	0.467001	0.420152	3529	tags=60%, list=37%, signal=38%	19247/19696/24088/19261/13211/70428/15975/15519/142980/67065/71586/56480/78781/13205/54123/215243/16362/170743/54131/108086/70408/268857/218832/74019/384309
GO:0050671	GO:0050671	positive regulation of lymphocyte proliferation	96	-0.373687	-1.54696	0.00468442	0.0926556	0.0833606	948	tags=21%, list=10%, signal=19%	16019/227059/12229/18950/321019/105855/12520/16002/12978/12053/17973/12519/17260/18106/16195/69165/16008/12775/12501/20304
GO:0002687	GO:0002687	positive regulation of leukocyte migration	94	-0.373866	-1.54932	0.00420855	0.0880849	0.0792484	789	tags=16%, list=8%, signal=15%	70839/74006/105855/11501/12978/215999/67374/19242/11542/20315/20343/12775/114332/12458/20304
GO:1905517	GO:1905517	macrophage migration	45	-0.373904	-1.34767	0.08981	0.433512	0.390023	2106	tags=31%, list=22%, signal=24%	17470/19271/75458/14595/74748/13051/57781/70839/12520/12978/13618/102103/12775/20304
GO:0045055	GO:0045055	regulated exocytosis	153	-0.373982	-1.69309	0.000302243	0.0189808	0.0170767	2337	tags=38%, list=24%, signal=29%	16414/18747/19204/12568/20983/20979/18750/14159/116838/20910/11765/78808/20619/27062/109880/26431/12286/15368/12889/56807/20965/19339/20615/12890/56632/54525/18806/16190/208898/13542/64051/13017/56743/80976/22318/207227/320405/12229/74006/105855/70497/20977/242662/11542/241770/20980/60510/20614/56216/19215/213760/16409/26875/56508/116837/19894/12298/72310
GO:0007613	GO:0007613	memory	92	-0.375014	-1.5476	0.00491535	0.0928374	0.0835241	1498	tags=29%, list=16%, signal=25%	66259/259277/20807/13051/72961/16440/68667/16835/224938/20317/19224/224671/16002/53357/208922/17762/20393/14811/19242/12307/23821/432530/20614/57340/382056/18762/11554
GO:0051209	GO:0051209	release of sequestered calcium ion into cytosol	67	-0.375143	-1.45134	0.019727	0.193194	0.173813	1370	tags=43%, list=14%, signal=37%	20617/74777/170756/233571/20541/238871/13367/16818/108837/109676/18797/56384/18754/28240/16416/234779/94178/12335/16438/65973/16439/12774/22063/54368/170770/57340/18796/69810/269615
GO:0097530	GO:0097530	granulocyte migration	85	-0.375237	-1.52432	0.0097713	0.132321	0.119047	2159	tags=31%, list=22%, signal=24%	18750/19271/20303/227541/75458/74748/17101/18613/56744/20306/277360/13482/22339/74006/105855/11501/12978/215999/270152/16409/12986/20305/319430/20343/12775/20304
GO:0050773	GO:0050773	regulation of dendrite development	101	-0.375407	-1.5701	0.00363519	0.0819951	0.0737695	2479	tags=40%, list=26%, signal=30%	12361/19055/11845/13844/213084/72162/17344/74143/74498/76454/227541/76089/15572/71900/20430/66515/12323/277360/170731/13047/56430/13631/21844/382253/74006/665113/69601/14366/217692/20393/18222/19242/13385/110197/382056/224617/76484/56508/23969/239420
GO:0032722	GO:0032722	positive regulation of chemokine production	39	-0.376522	-1.32665	0.11324	0.478889	0.430847	1788	tags=31%, list=19%, signal=25%	171285/19106/225471/16170/69807/16190/170743/16194/17196/12978/16007/20304
GO:0099072	GO:0099072	regulation of postsynaptic membrane neurotransmitter receptor levels	91	-0.377849	-1.55306	0.00563307	0.0976357	0.087841	2090	tags=36%, list=22%, signal=29%	268566/20913/71770/20619/13860/228136/12889/12300/108155/26414/94190/16416/18717/230235/22318/18693/232227/665113/233977/108086/50791/245666/18164/18222/13385/53310/103967/20614/56216/18762/18191/56508/23969
GO:1903510	GO:1903510	mucopolysaccharide metabolic process	48	-0.378252	-1.37935	0.0843585	0.425947	0.383217	892	tags=42%, list=9%, signal=38%	58994/319901/12445/15932/15931/11881/59031/18591/75612/217119/20544/94214/15212/27416/76775/60322/13618/209378/114332/13179
GO:1903035	GO:1903035	negative regulation of response to wounding	44	-0.378764	-1.35848	0.0858144	0.428886	0.38586	976	tags=23%, list=10%, signal=21%	269473/76499/11555/237847/16923/26365/243958/19128/12490/22370
GO:0042472	GO:0042472	inner ear morphogenesis	38	-0.379056	-1.333	0.11324	0.478889	0.430847	1625	tags=26%, list=17%, signal=22%	24064/11941/93840/14180/13542/16658/97031/13543/73750/50769
GO:0099173	GO:0099173	postsynapse organization	162	-0.380552	-1.73802	0.000148815	0.0118674	0.0106769	1889	tags=33%, list=20%, signal=27%	16337/81907/15185/54126/13196/77116/19878/94190/73178/12323/245684/231637/170731/16416/13631/13542/223666/230235/53321/70546/21844/18693/67943/382253/74006/12404/73086/50791/170758/18213/22084/243725/18164/239027/217692/77097/19655/16001/14811/18222/241638/18190/19242/13385/103967/232533/26570/236915/18191/56508/20404/19894/70729
GO:2001257	GO:2001257	regulation of cation channel activity	71	-0.3815	-1.49867	0.0118162	0.151055	0.135902	2870	tags=45%, list=30%, signal=32%	74777/14168/56437/116873/233571/11820/238871/19055/12568/432442/16485/14579/109676/14697/12293/69179/12286/20866/20266/234779/13040/83997/22318/15165/18693/65973/53357/57340/69106/16502/11554/12298
GO:0010770	GO:0010770	positive regulation of cell morphogenesis involved in differentiation	49	-0.381664	-1.39999	0.0644599	0.382228	0.343883	2479	tags=43%, list=26%, signal=32%	12361/13844/213084/72162/17344/74143/76454/66515/12323/170731/13047/13631/21844/382253/74006/665113/14366/20393/18222/13385/224617
GO:0030500	GO:0030500	regulation of bone mineralization	40	-0.381699	-1.34643	0.106195	0.467182	0.420315	2286	tags=45%, list=24%, signal=34%	106522/17966/12168/140780/20182/15251/13609/11481/75302/68667/11477/14758/11555/231633/12978/16007/19242/17260
GO:0032273	GO:0032273	positive regulation of protein polymerization	67	-0.382463	-1.47966	0.01602	0.174966	0.157414	2671	tags=40%, list=28%, signal=29%	101706/13043/67384/75991/14158/11845/23963/106763/14159/13191/328108/228361/17257/18754/26419/50884/56430/214444/105855/17973/193740/17762/72948/18479/260315/14544/15511
GO:0070231	GO:0070231	T cell apoptotic process	47	-0.382862	-1.38959	0.0826011	0.420768	0.378557	1244	tags=23%, list=13%, signal=20%	22163/20723/50996/19766/18950/11501/14605/170770/21940/16197/20304
GO:0045582	GO:0045582	positive regulation of T cell differentiation	86	-0.382904	-1.55551	0.00788522	0.115497	0.10391	1535	tags=23%, list=16%, signal=20%	22433/74734/320404/16190/107527/12394/16362/83796/18950/81601/105855/67155/11501/12053/63953/74048/21940/18762/12775/16197
GO:0031623	GO:0031623	receptor internalization	93	-0.385423	-1.59162	0.00338663	0.0791369	0.071198	2073	tags=34%, list=22%, signal=27%	71770/233489/22042/16337/18195/12300/77116/94190/18806/16416/22339/234779/213326/18717/109689/52906/72238/18693/232227/12520/108086/50791/26365/18222/13385/54409/103967/20614/268445/20404/13429/23969
GO:0001909	GO:0001909	leukocyte mediated cytotoxicity	77	-0.385638	-1.53285	0.00631923	0.101448	0.0912708	1268	tags=23%, list=13%, signal=20%	13051/20723/21355/93694/19294/18950/105855/17057/16002/15007/26365/15042/225825/16768/16409/54698/72310/16197
GO:0010769	GO:0010769	regulation of cell morphogenesis involved in differentiation	51	-0.385903	-1.42495	0.04947	0.342504	0.308145	2479	tags=43%, list=26%, signal=32%	12361/13844/213084/72162/17344/74143/76454/66515/12323/170731/13047/13631/21844/382253/74006/665113/12978/14366/20393/18222/13385/224617
GO:0032024	GO:0032024	positive regulation of insulin secretion	64	-0.386231	-1.48635	0.0150407	0.17019	0.153117	1831	tags=28%, list=19%, signal=23%	18754/15251/20866/66259/28240/12289/68667/109689/18642/14645/16438/19662/53357/215999/22063/56406/56508/26950
GO:0014074	GO:0014074	response to purine-containing compound	58	-0.38662	-1.45603	0.0449156	0.324568	0.292008	2715	tags=53%, list=28%, signal=39%	12192/74777/12912/11908/233571/20541/23959/238871/54611/18626/432442/109880/76089/16367/231637/28240/234779/18708/16440/68667/170743/15165/30955/70839/19062/16438/12916/65973/16439/207728/20343
GO:0045921	GO:0045921	positive regulation of exocytosis	62	-0.386768	-1.48224	0.0193688	0.192407	0.173105	2843	tags=52%, list=30%, signal=37%	20617/58994/11891/70450/116733/14389/76707/16414/19204/12568/20983/20979/18750/20910/11765/78808/27062/56807/19339/56632/54525/18806/16190/320405/76499/74006/53357/11542/60510/320051/16409/26950
GO:0043113	GO:0043113	receptor clustering	44	-0.387106	-1.3884	0.0770578	0.410889	0.369669	1479	tags=34%, list=15%, signal=29%	231637/171567/13542/230235/70546/18693/67943/12520/50791/18479/18190/19242/13385/26570/236915
GO:0045124	GO:0045124	regulation of bone resorption	34	-0.387291	-1.32544	0.118467	0.487451	0.438551	2322	tags=47%, list=24%, signal=36%	107173/18750/12349/16974/22042/21934/13609/100201/16416/22339/170826/11501/16331/231633/12978/26365
GO:0009581	GO:0009581	detection of external stimulus	43	-0.388973	-1.38553	0.0725664	0.402844	0.362431	610	tags=21%, list=6%, signal=20%	19662/18763/110911/20315/23821/73750/50769/18545/12298
GO:0009582	GO:0009582	detection of abiotic stimulus	43	-0.388973	-1.38553	0.0725664	0.402844	0.362431	610	tags=21%, list=6%, signal=20%	19662/18763/110911/20315/23821/73750/50769/18545/12298
GO:0030148	GO:0030148	sphingolipid biosynthetic process	57	-0.389053	-1.45722	0.031153	0.255618	0.229974	2097	tags=35%, list=22%, signal=28%	56336/77626/18753/67260/56386/66612/56632/57370/241447/67630/68059/22234/66190/20452/53357/208449/16007/20441/20597/20444
GO:0048525	GO:0048525	negative regulation of viral process	58	-0.389683	-1.46757	0.0389986	0.297558	0.267708	1956	tags=34%, list=20%, signal=28%	78781/80876/28036/20684/19106/69807/98999/17069/17535/22038/12642/80287/19062/67525/76681/384309/218850/236312/209387/20304
GO:0061028	GO:0061028	establishment of endothelial barrier	34	-0.389727	-1.33377	0.118467	0.487451	0.438551	375	tags=32%, list=4%, signal=31%	76089/18613/19878/50918/22339/207728/21872/16456/13618/18669/12741
GO:0010812	GO:0010812	negative regulation of cell-substrate adhesion	34	-0.389971	-1.33461	0.116725	0.485653	0.436933	1285	tags=26%, list=13%, signal=23%	60595/18708/76499/235431/12053/14366/12842/20745/11815
GO:0031343	GO:0031343	positive regulation of cell killing	43	-0.390376	-1.39052	0.0725664	0.402844	0.362431	1044	tags=21%, list=11%, signal=19%	21355/19294/18950/15007/15042/225825/16768/16409/54698
GO:0002027	GO:0002027	regulation of heart rate	36	-0.390497	-1.35646	0.0982759	0.450766	0.405546	2587	tags=50%, list=27%, signal=37%	20541/72821/238871/13819/109676/12293/72745/20266/18708/12289/68667/15165/16518/80297/13618/70729/17868/11554
GO:0045638	GO:0045638	negative regulation of myeloid cell differentiation	56	-0.391156	-1.4634	0.0222678	0.20679	0.186045	1403	tags=27%, list=15%, signal=23%	16909/320404/12394/18708/16658/68027/72147/93694/229700/234515/16331/50754/12978/26365/18725
GO:0019935	GO:0019935	cyclic-nucleotide-mediated signaling	34	-0.391451	-1.33967	0.114983	0.483598	0.435085	822	tags=24%, list=9%, signal=22%	16706/18576/23984/51799/207728/54195/230857/13618
GO:0061756	GO:0061756	leukocyte adhesion to vascular endothelial cell	32	-0.391471	-1.32214	0.110333	0.472945	0.4255	467	tags=41%, list=5%, signal=39%	11519/16414/19204/16600/54371/13051/19697/67374/14537/20345/20315/16409/20343
GO:0010927	GO:0010927	cellular component assembly involved in morphogenesis	63	-0.391903	-1.50668	0.0122747	0.15417	0.138704	1639	tags=30%, list=17%, signal=25%	77116/237336/232664/170731/20807/269116/102693/53321/12335/12632/19294/76499/21916/50876/17258/72948/17260/54137/17868
GO:0140029	GO:0140029	exocytic process	73	-0.391963	-1.5434	0.0064755	0.103279	0.0929183	2067	tags=38%, list=22%, signal=30%	20979/116838/20910/78808/20619/27062/102058/12889/19339/20615/71732/12890/54525/208898/64051/13017/75914/22318/320405/12229/11542/20980/60510/20614/56216/26875/116837/19894
GO:0060079	GO:0060079	excitatory postsynaptic potential	52	-0.392158	-1.45642	0.0378513	0.291664	0.262405	2293	tags=42%, list=24%, signal=32%	20405/12568/116838/17257/81907/110891/77116/108013/231637/72961/13542/12404/11555/243725/14811/17260/13385/56216/224617/18762/26875/116837
GO:0008593	GO:0008593	regulation of Notch signaling pathway	51	-0.392716	-1.45011	0.0395788	0.300369	0.270236	1127	tags=25%, list=12%, signal=23%	16848/109689/215705/75745/13855/18011/12053/16897/320705/18222/16195/69068/353156
GO:0007260	GO:0007260	tyrosine phosphorylation of STAT protein	38	-0.392769	-1.38123	0.0940767	0.441857	0.397531	982	tags=21%, list=10%, signal=19%	16362/16194/547253/12978/16923/74019/16195/20304
GO:0007568	GO:0007568	aging	46	-0.392786	-1.42014	0.0695652	0.396793	0.356987	844	tags=17%, list=9%, signal=16%	76933/20416/20511/22084/12577/11676/50769/11815
GO:0045637	GO:0045637	regulation of myeloid cell differentiation	134	-0.392822	-1.72195	0.00027378	0.0176342	0.0158652	1403	tags=25%, list=15%, signal=21%	16909/320404/100201/22778/16416/68235/12394/75302/18708/170826/16658/68027/72147/93694/229700/19766/105855/57816/234515/11501/67017/16331/50754/18129/12978/193740/26365/17260/18725/16409/12986/15511/20304
GO:0046850	GO:0046850	regulation of bone remodeling	39	-0.393025	-1.3848	0.0836237	0.424369	0.381797	2322	tags=46%, list=24%, signal=35%	107173/18750/12349/16974/22042/21934/13609/54525/100201/16416/22339/170826/234515/11501/16331/231633/12978/26365
GO:0046928	GO:0046928	regulation of neurotransmitter secretion	62	-0.393746	-1.50898	0.0145601	0.167088	0.150326	2283	tags=56%, list=24%, signal=43%	14265/18015/20617/29873/228545/72194/20964/12361/67760/20983/20979/18750/116838/20910/78808/109880/26431/12286/12889/19339/20615/12890/13542/207227/74006/16504/20977/243725/242662/17260/241770/56216/213760/116837/12298
GO:0043547	GO:0043547	positive regulation of GTPase activity	180	-0.394983	-1.8261	1.01093e-05	0.00188108	0.00169237	2065	tags=33%, list=21%, signal=26%	14697/20662/20303/233489/24012/381085/218397/233046/241308/76089/213990/54126/20401/13196/13609/16403/20306/277360/20469/216991/19765/70719/544817/271981/72238/21844/74206/71310/329260/29809/227800/232227/244668/382253/69993/241694/240168/226089/228850/99326/13543/18213/170625/22084/67016/239027/218038/217692/105445/14270/217944/100855/16456/106952/20305/56508/12775/11554/20304
GO:0031110	GO:0031110	regulation of microtubule polymerization or depolymerization	73	-0.395977	-1.5592	0.00522371	0.0950867	0.0855477	3129	tags=53%, list=33%, signal=36%	227634/17754/68041/57785/20617/14168/72205/101706/16800/140810/75991/76707/246103/14159/13191/328108/230101/17257/74392/15185/20262/54126/76686/29877/26419/56430/214444/17318/76499/100732/13548/193740/17762/20393/18479/22153/260315/14544/15511
GO:0045807	GO:0045807	positive regulation of endocytosis	89	-0.396721	-1.62521	0.00237312	0.0630824	0.0567541	2073	tags=40%, list=22%, signal=32%	12752/19055/20405/236266/71770/233489/20616/14129/16337/216190/18195/76686/12475/73178/18806/227333/22339/234779/60595/213326/13631/109689/52906/72238/16019/18693/74006/12121/105855/12476/50791/218038/20597/13429/12775/22370
GO:0050775	GO:0050775	positive regulation of dendrite morphogenesis	47	-0.396837	-1.44031	0.0527241	0.352711	0.317327	2479	tags=51%, list=26%, signal=38%	108100/19266/29819/12361/13844/213084/72162/17344/74143/76454/66515/12323/170731/13047/13631/21844/382253/74006/665113/14366/20393/18222/13385/224617
GO:1901224	GO:1901224	positive regulation of NIK/NF-kappaB signaling	42	-0.397052	-1.40104	0.0689046	0.396793	0.356987	1875	tags=36%, list=20%, signal=29%	13205/328572/171285/319817/19106/18569/19245/12475/60595/19697/170743/236511/214150/69068/67445
GO:0062237	GO:0062237	protein localization to postsynapse	48	-0.398092	-1.4517	0.0439367	0.321307	0.289074	1753	tags=35%, list=18%, signal=29%	12889/12300/108155/26414/70546/22318/665113/50791/245666/18164/14811/13385/20614/56216/18762/18191/56508
GO:1903539	GO:1903539	protein localization to postsynaptic membrane	48	-0.398092	-1.4517	0.0439367	0.321307	0.289074	1753	tags=35%, list=18%, signal=29%	12889/12300/108155/26414/70546/22318/665113/50791/245666/18164/14811/13385/20614/56216/18762/18191/56508
GO:0034331	GO:0034331	cell junction maintenance	35	-0.398108	-1.37696	0.0963855	0.445972	0.401233	1771	tags=49%, list=18%, signal=40%	23829/11845/218952/116838/243743/94190/19339/16416/103172/53321/12404/20661/12978/21872/56513/73750/56410
GO:0001912	GO:0001912	positive regulation of leukocyte mediated cytotoxicity	40	-0.398535	-1.40582	0.0725664	0.402844	0.362431	1044	tags=22%, list=11%, signal=20%	21355/19294/18950/15007/15042/225825/16768/16409/54698
GO:0042102	GO:0042102	positive regulation of T cell proliferation	69	-0.399052	-1.55531	0.00780487	0.115497	0.10391	799	tags=19%, list=8%, signal=17%	18950/105855/12520/16002/17973/12519/18106/16195/69165/16008/12775/12501/20304
GO:0002279	GO:0002279	mast cell activation involved in immune response	35	-0.401336	-1.38812	0.0929432	0.438576	0.394579	2702	tags=43%, list=28%, signal=31%	70450/14389/14158/14159/20910/20619/15368/12890/56632/18806/16190/56743/12229/11542/19215
GO:0008542	GO:0008542	visual learning	41	-0.402391	-1.42156	0.0565371	0.363226	0.326787	2953	tags=46%, list=31%, signal=32%	18015/20320/15932/12912/11820/12568/17257/109880/108012/15251/72108/234593/54006/195018/18574/20393/14811/26570/98660
GO:0071621	GO:0071621	granulocyte chemotaxis	70	-0.402912	-1.5782	0.0090013	0.126718	0.114006	770	tags=33%, list=8%, signal=30%	18750/19271/20303/227541/75458/17101/56744/20306/277360/13482/22339/74006/105855/12978/215999/270152/16409/12986/20305/319430/20343/12775/20304
GO:0046785	GO:0046785	microtubule polymerization	72	-0.403119	-1.57706	0.00773781	0.115014	0.103476	2138	tags=36%, list=22%, signal=28%	14159/13191/328108/230101/17257/51885/54126/76686/29877/26419/56430/214444/233276/76499/100732/76789/13548/193740/17762/20393/72948/18479/22153/260315/14544/15511
GO:0030316	GO:0030316	osteoclast differentiation	77	-0.404108	-1.60627	0.00295638	0.0738949	0.0664819	3053	tags=52%, list=32%, signal=36%	26416/18032/12608/18015/14628/20308/12912/14389/216161/19055/107173/16477/16969/12349/17342/22042/21934/215653/233328/100201/16416/75302/18708/170826/16658/68027/93694/27060/321019/12520/234515/11501/16331/18018/50754/18129/12978/26365/18725/20304
GO:0060291	GO:0060291	long-term synaptic potentiation	71	-0.404132	-1.58757	0.00462154	0.0921374	0.0828944	1971	tags=35%, list=21%, signal=28%	17257/109880/20853/110891/19339/12323/13051/16440/70546/22318/268755/243725/260297/208922/18479/14811/19242/12307/432530/20614/12308/382056/18762/116837/11554
GO:0030203	GO:0030203	glycosaminoglycan metabolic process	56	-0.404161	-1.51205	0.0145342	0.167088	0.150326	2843	tags=45%, list=30%, signal=32%	58994/319901/12445/15932/15931/11881/59031/18591/75612/15531/21946/217119/20544/72727/94214/15212/27416/76775/60322/218271/17423/13618/209378/114332/13179
GO:0007020	GO:0007020	microtubule nucleation	34	-0.404492	-1.3843	0.0888502	0.432418	0.389038	2487	tags=38%, list=26%, signal=28%	75991/76707/13191/17257/51885/54126/233276/76499/76789/193740/72948/18479/15511
GO:0007189	GO:0007189	adenylate cyclase-activating G protein-coupled receptor signaling pathway	45	-0.404501	-1.45795	0.0552677	0.360878	0.324675	662	tags=20%, list=7%, signal=19%	105171/11555/14766/23984/54409/432530/11515/56508/11554
GO:0006665	GO:0006665	sphingolipid metabolic process	79	-0.404548	-1.61304	0.0025487	0.0671201	0.0603867	2097	tags=37%, list=22%, signal=29%	56336/230101/77626/18753/67260/56386/66612/192654/56632/57370/17761/218442/241447/67630/68059/22234/26943/433323/15212/66190/12916/20452/53357/208449/16007/20441/20597/20444/19012
GO:0017157	GO:0017157	regulation of exocytosis	138	-0.404684	-1.79097	6.32975e-05	0.0067661	0.00608733	2843	tags=46%, list=30%, signal=33%	58994/29873/11891/19338/70450/228545/72194/116733/14389/20964/12361/14158/76707/16414/19204/12568/20983/20979/18750/14159/116838/20910/11765/78808/20619/27062/109880/26431/12286/15368/18195/12889/56807/19339/20615/56632/54525/18806/16190/13542/80976/22318/207227/320405/76499/74006/105855/53357/20977/242662/11542/241770/20980/60510/56216/320051/213760/16409/26875/56508/116837/19894/26950/12298
GO:0015844	GO:0015844	monoamine transport	50	-0.406163	-1.49635	0.0200437	0.194401	0.174899	2212	tags=44%, list=23%, signal=34%	20983/20979/17257/27062/16490/19339/22433/17069/54525/16416/64652/80976/12495/19224/18693/70839/14758/11542/20980/20315/60510/18546
GO:0055117	GO:0055117	regulation of cardiac muscle contraction	29	-0.406306	-1.34724	0.122558	0.492584	0.443169	3320	tags=55%, list=35%, signal=36%	230738/30948/19735/11603/57785/14168/20541/238871/109676/20544/17131/68667/16518/11931/98660/11554
GO:0006112	GO:0006112	energy reserve metabolic process	48	-0.406483	-1.4823	0.0277443	0.236249	0.212549	2103	tags=38%, list=22%, signal=29%	77559/11364/110078/16337/244416/16367/12421/110094/68961/18642/19062/58200/16002/108099/16195/217166/17751/11554
GO:0002704	GO:0002704	negative regulation of leukocyte mediated immunity	38	-0.406633	-1.42998	0.0574913	0.364232	0.327693	1844	tags=39%, list=19%, signal=32%	15368/171285/16453/13051/17131/20723/21355/93694/12946/105855/16002/12053/26365/74048/16197
GO:0007601	GO:0007601	visual perception	43	-0.406748	-1.44884	0.0513274	0.349416	0.314363	657	tags=19%, list=7%, signal=17%	22772/19662/77945/12628/70355/12842/50769/12298
GO:0048009	GO:0048009	insulin-like growth factor receptor signaling pathway	30	-0.406805	-1.35576	0.0987654	0.450766	0.405546	2563	tags=47%, list=27%, signal=34%	83946/68818/227331/246103/57330/20662/16367/18708/16010/20416/16002/22084/16001/16008
GO:0098751	GO:0098751	bone cell development	28	-0.407035	-1.34839	0.121479	0.492116	0.442747	2230	tags=39%, list=23%, signal=30%	242687/18718/328572/233328/20807/233405/29809/50754/18129/16923/54368
GO:0007632	GO:0007632	visual behavior	43	-0.40739	-1.45113	0.0495575	0.342504	0.308145	2953	tags=47%, list=31%, signal=32%	18015/20320/15932/12912/11820/12568/17257/109880/108012/15251/72108/234593/54006/195018/18574/20511/20393/14811/26570/98660
GO:0042509	GO:0042509	regulation of tyrosine phosphorylation of STAT protein	36	-0.407967	-1.41715	0.0758621	0.410259	0.369103	982	tags=22%, list=10%, signal=20%	16362/16194/547253/12978/16923/74019/16195/20304
GO:0043300	GO:0043300	regulation of leukocyte degranulation	34	-0.408326	-1.39743	0.0818815	0.420768	0.378557	2702	tags=44%, list=28%, signal=32%	70450/14389/14158/16414/19204/14159/20910/11765/15368/56632/18806/16190/105855/11542/16409
GO:1901021	GO:1901021	positive regulation of calcium ion transmembrane transporter activity	27	-0.408384	-1.33464	0.122995	0.493157	0.443684	2714	tags=48%, list=28%, signal=35%	116873/233571/19055/12568/109676/12293/69179/20544/20866/234779/65973/11931/12298
GO:0070229	GO:0070229	negative regulation of lymphocyte apoptotic process	31	-0.409374	-1.37711	0.0897887	0.433512	0.390023	1758	tags=35%, list=18%, signal=29%	15251/16453/66612/22163/20723/227059/18950/14605/21940/16197/20304
GO:1901016	GO:1901016	regulation of potassium ion transmembrane transporter activity	28	-0.409484	-1.3565	0.117958	0.487352	0.438461	2163	tags=32%, list=23%, signal=25%	432442/16485/109676/12289/22318/18693/11931/11932/16502
GO:0072676	GO:0072676	lymphocyte migration	74	-0.409711	-1.6155	0.0053313	0.0957111	0.0861095	1549	tags=24%, list=16%, signal=21%	73178/20306/16416/57781/12642/380916/321019/11501/67374/20315/18600/16456/20305/54698/12775/11815/12458/20304
GO:0051592	GO:0051592	response to calcium ion	81	-0.410377	-1.64528	0.00189272	0.0581461	0.052313	2628	tags=52%, list=27%, signal=38%	18013/13605/232341/11820/19055/78830/16477/18783/20983/20979/67898/16476/16478/18021/109880/328572/233908/20866/70568/66972/54525/320404/28240/234779/16440/11690/14567/54153/94178/12335/80976/18575/15165/17258/65973/20597/17260/22063/20980/60510/58802/16531
GO:0006022	GO:0006022	aminoglycan metabolic process	60	-0.410586	-1.56263	0.0115687	0.149411	0.134422	2843	tags=47%, list=30%, signal=33%	58994/319901/12445/15932/15931/11881/59031/18591/53625/75612/15531/56336/21946/217119/20544/72727/94214/15212/74245/27416/76775/60322/218271/17423/13618/209378/114332/13179
GO:0061098	GO:0061098	positive regulation of protein tyrosine kinase activity	26	-0.410762	-1.32554	0.122083	0.49225	0.442868	797	tags=31%, list=8%, signal=28%	21802/66610/13543/50754/18011/12978/13385/53310
GO:0099003	GO:0099003	vesicle-mediated transport in synapse	191	-0.411963	-1.92293	1.29033e-06	0.000463044	0.000416592	2518	tags=43%, list=26%, signal=32%	20964/12725/12361/269774/11845/13367/18747/20405/12568/20983/20979/18750/64933/71770/116838/20910/78808/20619/233489/20616/27204/27062/109880/20403/26431/12286/108012/12889/56807/20430/381979/20965/26414/94190/19339/18786/20615/12890/54525/16416/102866/72961/208898/218503/18717/13542/64051/13017/22318/18805/207227/320405/18693/232227/224671/74006/104069/108086/50791/20977/218038/242662/18222/2417…
GO:0032411	GO:0032411	positive regulation of transporter activity	70	-0.412061	-1.61404	0.00695849	0.108153	0.0973031	2461	tags=41%, list=26%, signal=31%	15980/19055/68943/13844/19204/12568/11977/432442/16485/109676/12293/69179/18753/20544/12300/20866/77574/234779/13040/15165/57816/11555/65973/11931/11932/18669/16502/11554/12298
GO:0021799	GO:0021799	cerebral cortex radially oriented cell migration	28	-0.412109	-1.36519	0.116197	0.485266	0.436585	1490	tags=29%, list=16%, signal=24%	192157/18992/223697/70839/14766/69601/330938/14270
GO:0051591	GO:0051591	response to cAMP	31	-0.412197	-1.38661	0.0880282	0.431778	0.388462	2587	tags=48%, list=27%, signal=35%	20541/238871/18626/432442/109880/76089/18708/16440/15165/30955/19062/16438/12916/16439/207728
GO:0006687	GO:0006687	glycosphingolipid metabolic process	33	-0.412719	-1.40768	0.0802792	0.417087	0.375245	2097	tags=39%, list=22%, signal=31%	56336/230101/18753/56386/57370/17761/68059/22234/15212/12916/20452/20441/20444
GO:0070050	GO:0070050	neuron cellular homeostasis	47	-0.413446	-1.50059	0.0266874	0.23077	0.20762	2673	tags=43%, list=28%, signal=31%	66335/11820/12725/12568/11977/13191/12349/12286/71900/110891/11941/20615/72961/15212/12307/12308/76252/66237/22174/50932
GO:0043303	GO:0043303	mast cell degranulation	33	-0.413483	-1.41029	0.0802792	0.417087	0.375245	2702	tags=45%, list=28%, signal=33%	70450/14389/14158/14159/20910/20619/15368/12890/56632/18806/16190/56743/12229/11542/19215
GO:0015872	GO:0015872	dopamine transport	29	-0.413898	-1.37242	0.10302	0.458839	0.412809	2979	tags=52%, list=31%, signal=36%	269642/20617/58994/68943/20983/20979/16490/19339/54525/80976/12495/20980/20315/60510/18546
GO:0002526	GO:0002526	acute inflammatory response	48	-0.414237	-1.51057	0.0219547	0.205272	0.184679	1325	tags=29%, list=14%, signal=25%	72461/11690/11477/20723/22038/192195/30955/12229/11501/12774/13618/93671/12775/20304
GO:0002688	GO:0002688	regulation of leukocyte chemotaxis	70	-0.414584	-1.62392	0.00613017	0.100977	0.0908471	770	tags=19%, list=8%, signal=17%	74006/105855/12978/215999/19242/20315/18600/102103/319430/20343/12775/12458/20304
GO:0099172	GO:0099172	presynapse organization	31	-0.415088	-1.39633	0.0862676	0.429117	0.386069	2539	tags=52%, list=26%, signal=38%	20617/19266/11820/11845/272381/233489/20616/54126/20615/232370/13542/12404/18213/76965/12217/26875
GO:0071677	GO:0071677	positive regulation of mononuclear cell migration	46	-0.415147	-1.50098	0.0279777	0.236633	0.212894	666	tags=13%, list=7%, signal=12%	11501/67374/20315/12775/12458/20304
GO:0099084	GO:0099084	postsynaptic specialization organization	36	-0.415156	-1.44212	0.0724138	0.402844	0.362431	1574	tags=31%, list=16%, signal=26%	81907/94190/16416/53321/12404/18213/18164/217692/18190/236915/18191
GO:0070536	GO:0070536	protein K63-linked deubiquitination	31	-0.415351	-1.39722	0.0862676	0.429117	0.386069	900	tags=16%, list=9%, signal=15%	71198/75083/229603/263876/76630
GO:0032414	GO:0032414	positive regulation of ion transmembrane transporter activity	67	-0.415416	-1.60715	0.0051456	0.0943485	0.0848836	2461	tags=42%, list=26%, signal=31%	15980/19055/68943/13844/19204/12568/11977/432442/16485/109676/12293/69179/20544/12300/20866/77574/234779/13040/15165/57816/11555/65973/11931/11932/18669/16502/11554/12298
GO:0045058	GO:0045058	T cell selection	37	-0.415531	-1.44981	0.061082	0.374696	0.337107	2706	tags=38%, list=28%, signal=27%	12500/58208/94176/19255/109880/16364/20852/20807/320404/16194/17085/50932/12775/12501
GO:1990266	GO:1990266	neutrophil migration	69	-0.416066	-1.62162	0.00362652	0.0819951	0.0737695	770	tags=17%, list=8%, signal=16%	74006/105855/11501/215999/270152/16409/12986/20305/319430/20343/12775/20304
GO:0002690	GO:0002690	positive regulation of leukocyte chemotaxis	55	-0.416221	-1.55397	0.00624886	0.101448	0.0912708	770	tags=18%, list=8%, signal=17%	74006/105855/12978/215999/19242/20315/20343/12775/12458/20304
GO:0051606	GO:0051606	detection of stimulus	71	-0.417062	-1.63837	0.00261226	0.0676494	0.0608629	610	tags=23%, list=6%, signal=21%	19662/18763/17948/110911/18479/13805/20315/23821/58802/18796/69165/54698/73750/50769/18545/12298
GO:0010939	GO:0010939	regulation of necrotic cell death	27	-0.417169	-1.36335	0.110517	0.472945	0.4255	835	tags=19%, list=9%, signal=17%	19766/11796/11797/263876/17751
GO:0051145	GO:0051145	smooth muscle cell differentiation	40	-0.4176	-1.47307	0.0442478	0.322643	0.290276	2505	tags=45%, list=26%, signal=33%	81702/18591/54720/18021/17257/18569/93840/20807/14180/22339/11477/67155/18018/12628/13805/17260/54409/13618
GO:0042119	GO:0042119	neutrophil activation	23	-0.417716	-1.31637	0.125224	0.498908	0.448859	110	tags=30%, list=1%, signal=30%	16414/19204/69188/18753/16170/16409/20304
GO:0006940	GO:0006940	regulation of smooth muscle contraction	27	-0.419218	-1.37005	0.106952	0.468462	0.421467	1608	tags=33%, list=17%, signal=28%	66612/20807/19224/238130/20416/11555/16531/98660/11554
GO:0034109	GO:0034109	homotypic cell-cell adhesion	49	-0.41941	-1.53845	0.0130328	0.158924	0.142981	1156	tags=27%, list=12%, signal=23%	16416/18717/233405/16194/70839/11555/16923/12628/26365/16456/26570/22174/20304
GO:0006836	GO:0006836	neurotransmitter transport	125	-0.419817	-1.8213	5.59943e-05	0.00625145	0.00562431	2306	tags=45%, list=24%, signal=35%	18747/67760/20983/20979/18750/116838/20910/78808/20619/20616/27204/27062/109880/14412/26431/12286/12889/381979/20965/108030/19339/22433/20615/12890/54525/16416/72961/208898/13542/64051/13017/22318/207227/320405/74006/14758/20511/16504/20977/243725/242662/18479/18190/17260/241770/20980/60510/20614/56216/213760/26875/18191/116837/98660/19894/12298
GO:0001505	GO:0001505	regulation of neurotransmitter levels	133	-0.420417	-1.84983	3.12364e-05	0.00423172	0.0038072	2306	tags=44%, list=24%, signal=34%	18747/67760/20983/67269/20979/18750/116838/20910/78808/20619/20616/27204/27062/231871/109880/26431/12286/12889/381979/20965/108030/19339/22433/20615/12890/54525/16416/72961/208898/13542/64051/13017/22318/207227/320405/18574/74006/14758/20511/16504/20977/243725/140483/242662/18479/18190/17260/241770/20980/60510/20614/56216/213760/26875/18191/116837/98660/19894/12298
GO:0042267	GO:0042267	natural killer cell mediated cytotoxicity	44	-0.420807	-1.50927	0.0195197	0.192666	0.173338	1135	tags=32%, list=12%, signal=28%	17101/171285/52118/20723/21355/93694/19294/17057/16002/26365/225825/16768/54698/72310
GO:0099590	GO:0099590	neurotransmitter receptor internalization	30	-0.421244	-1.40388	0.0776014	0.410889	0.369669	1750	tags=37%, list=18%, signal=30%	12300/94190/16416/18717/18693/232227/108086/18222/103967/20614/23969
GO:2000181	GO:2000181	negative regulation of blood vessel morphogenesis	63	-0.421318	-1.61977	0.00545403	0.0961441	0.086499	1087	tags=30%, list=11%, signal=27%	68545/20317/66214/19274/18576/16598/20416/20692/13855/11555/236511/69601/16923/60611/19242/74769/11504/12741/13179
GO:0031111	GO:0031111	negative regulation of microtubule polymerization or depolymerization	36	-0.422776	-1.46859	0.0603448	0.371535	0.334263	3129	tags=58%, list=33%, signal=39%	227634/17754/68041/20617/14168/72205/16800/140810/76707/246103/74392/15185/54126/76686/29877/17318/76499/13548/20393/22153/260315
GO:2000108	GO:2000108	positive regulation of leukocyte apoptotic process	27	-0.424251	-1.38649	0.101604	0.45455	0.40895	666	tags=22%, list=7%, signal=21%	50996/11501/17260/170770/74769/20304
GO:0010762	GO:0010762	regulation of fibroblast migration	33	-0.424565	-1.44809	0.0715532	0.401884	0.361567	2734	tags=52%, list=28%, signal=37%	14673/20541/67384/18591/12752/72446/14158/109880/216190/18754/16416/171207/22084/67338/83397/114886/18479
GO:0002228	GO:0002228	natural killer cell mediated immunity	45	-0.425018	-1.5319	0.0195084	0.192666	0.173338	1794	tags=33%, list=19%, signal=27%	17101/171285/52118/13482/20723/21355/93694/19294/17057/16002/26365/225825/16768/54698/72310
GO:0060078	GO:0060078	regulation of postsynaptic membrane potential	69	-0.425342	-1.65777	0.00215563	0.060166	0.0541303	2067	tags=42%, list=22%, signal=33%	116838/24012/17257/81907/14406/52882/110891/77116/108013/231637/72961/13542/15165/235086/12404/11555/243725/14802/14811/17260/13385/56216/224617/18762/26875/116837/14394/11554/14399
GO:0010799	GO:0010799	regulation of peptidyl-threonine phosphorylation	28	-0.425571	-1.40979	0.0915493	0.436794	0.392975	2778	tags=46%, list=29%, signal=33%	114715/83946/11820/114716/108155/24064/74747/17131/15944/19062/108099/16145/260299
GO:0016525	GO:0016525	negative regulation of angiogenesis	62	-0.425608	-1.63109	0.00406728	0.0867532	0.0780503	1087	tags=31%, list=11%, signal=27%	68545/20317/66214/19274/18576/16598/20416/20692/13855/11555/236511/69601/16923/60611/19242/74769/11504/12741/13179
GO:0002761	GO:0002761	regulation of myeloid leukocyte differentiation	83	-0.427165	-1.72093	0.000466957	0.0249573	0.0224537	2953	tags=48%, list=31%, signal=34%	18015/12192/16842/20308/15499/12912/17869/19055/19255/107173/16969/18750/14159/16476/12349/17342/215653/100201/22778/16416/12394/75302/18708/170826/16658/68027/72147/93694/19766/57816/234515/11501/16331/50754/18129/12978/26365/18725/16409/20304
GO:0090659	GO:0090659	walking behavior	32	-0.427461	-1.4437	0.0683012	0.396242	0.356491	387	tags=16%, list=4%, signal=15%	17762/80297/16531/57754/12298
GO:0098586	GO:0098586	cellular response to virus	28	-0.428785	-1.42044	0.084507	0.425969	0.383236	3053	tags=57%, list=32%, signal=39%	26416/14265/107338/216799/15519/142980/11909/78781/13205/15251/18987/15944/170743/54131/56417/16145
GO:0090162	GO:0090162	establishment of epithelial cell polarity	23	-0.428972	-1.35184	0.105546	0.465959	0.419215	2793	tags=52%, list=29%, signal=37%	15205/232288/19159/11845/20401/94190/93840/20469/74206/209630/18763/360013
GO:1903670	GO:1903670	regulation of sprouting angiogenesis	24	-0.430125	-1.36923	0.101423	0.454146	0.408587	1349	tags=50%, list=14%, signal=43%	228852/16600/15251/17125/22339/14645/16598/13855/16923/26365/21872/74769
GO:0050885	GO:0050885	neuromuscular process controlling balance	39	-0.430138	-1.51557	0.0225453	0.208213	0.187325	2539	tags=38%, list=26%, signal=28%	11820/12752/227331/12286/108012/11941/12323/53321/319984/15212/20512/170758/13385/16531/57340
GO:0043368	GO:0043368	positive T cell selection	28	-0.430144	-1.42494	0.0827465	0.420768	0.378557	2706	tags=43%, list=28%, signal=31%	12500/58208/94176/19255/109880/16364/20852/20807/320404/16194/17085/12501
GO:0001913	GO:0001913	T cell mediated cytotoxicity	28	-0.43049	-1.42609	0.0827465	0.420768	0.378557	1135	tags=29%, list=12%, signal=25%	20723/21355/19294/18950/105855/15007/15042/16197
GO:0098815	GO:0098815	modulation of excitatory postsynaptic potential	38	-0.431136	-1.51615	0.0259336	0.22728	0.20448	1850	tags=39%, list=19%, signal=32%	81907/110891/77116/108013/231637/13542/12404/11555/14811/13385/56216/224617/18762/26875/116837
GO:0099504	GO:0099504	synaptic vesicle cycle	164	-0.431698	-1.97577	1.95577e-06	0.000545876	0.000491114	2306	tags=43%, list=24%, signal=33%	18747/20405/12568/20983/20979/18750/64933/71770/116838/20910/78808/20619/233489/20616/27204/27062/109880/20403/26431/12286/108012/12889/56807/20430/381979/20965/94190/19339/18786/20615/12890/54525/102866/72961/208898/218503/18717/13542/64051/13017/22318/18805/207227/320405/224671/74006/104069/50791/20977/218038/242662/241770/20980/60510/103967/20614/56216/76252/224617/12217/213760/26875/56508/204…
GO:0021697	GO:0021697	cerebellar cortex formation	26	-0.431797	-1.39342	0.0969479	0.447671	0.402762	2252	tags=42%, list=23%, signal=32%	12568/67269/11977/12286/11941/94190/12404/57754/76484/72393/73750
GO:0097106	GO:0097106	postsynaptic density organization	29	-0.431816	-1.43183	0.0728242	0.403069	0.362634	1850	tags=41%, list=19%, signal=34%	11845/272381/81907/94190/16416/53321/12404/18213/18164/217692/18190/18191
GO:0045576	GO:0045576	mast cell activation	47	-0.431833	-1.56732	0.013541	0.161209	0.145037	2702	tags=45%, list=28%, signal=32%	70450/14131/14389/14158/14159/20910/20619/19267/15368/74734/12890/56632/18806/16190/22038/56743/12229/19294/11542/19215/225825
GO:1903305	GO:1903305	regulation of regulated secretory pathway	96	-0.432146	-1.78896	0.000263945	0.0176342	0.0158652	2755	tags=50%, list=29%, signal=36%	11891/70450/228545/72194/14389/20964/12361/14158/16414/19204/12568/20983/20979/18750/14159/116838/20910/11765/78808/27062/109880/26431/12286/15368/56807/19339/20615/56632/54525/18806/16190/13542/80976/22318/207227/74006/105855/20977/242662/11542/241770/20980/60510/213760/16409/116837/19894/12298
GO:0034389	GO:0034389	lipid droplet organization	21	-0.433384	-1.34705	0.122558	0.492584	0.443169	1846	tags=38%, list=19%, signal=31%	11993/72108/320951/81601/66853/110911/217695/74596
GO:0099171	GO:0099171	presynaptic modulation of chemical synaptic transmission	29	-0.43549	-1.44401	0.0692718	0.396793	0.356987	629	tags=41%, list=7%, signal=39%	18750/68404/26431/18754/19339/11555/268934/11542/319924/23821/432530/18191
GO:0000289	GO:0000289	nuclear-transcribed mRNA poly(A) tail shortening	21	-0.436473	-1.35665	0.120782	0.490547	0.441336	3126	tags=57%, list=33%, signal=39%	231464/234594/217351/22695/233833/12227/239528/213988/232791/103135/72587/208922
GO:0045639	GO:0045639	positive regulation of myeloid cell differentiation	66	-0.436589	-1.68769	0.00187861	0.0581461	0.052313	1367	tags=56%, list=14%, signal=48%	21847/14281/20848/56637/217864/26416/12192/16842/20308/15499/11480/217127/12912/19055/18750/14159/16476/12349/15251/100201/22778/16416/68235/12394/75302/170826/19766/105855/57816/67017/16331/18129/12978/193740/16409/15511/20304
GO:0032232	GO:0032232	negative regulation of actin filament bundle assembly	22	-0.437234	-1.37217	0.102518	0.457416	0.411529	1253	tags=50%, list=13%, signal=44%	76707/242687/13609/18708/76499/235431/19062/233977/243725/21872/16456
GO:1904738	GO:1904738	vascular associated smooth muscle cell migration	25	-0.437332	-1.39754	0.0990991	0.450766	0.405546	1479	tags=40%, list=15%, signal=34%	18015/14673/18591/11977/231637/14180/238130/18479/17260/11504
GO:2000403	GO:2000403	positive regulation of lymphocyte migration	31	-0.437818	-1.4728	0.0580986	0.365556	0.328884	666	tags=16%, list=7%, signal=15%	11501/67374/20315/12775/20304
GO:1901343	GO:1901343	negative regulation of vasculature development	64	-0.437819	-1.68488	0.00185251	0.0581461	0.052313	1087	tags=31%, list=11%, signal=28%	68545/20317/66214/19274/18576/16598/20416/20692/13855/11555/236511/69601/16923/60611/19242/74769/654812/11504/12741/13179
GO:0045601	GO:0045601	regulation of endothelial cell differentiation	27	-0.43798	-1.43136	0.0802139	0.417087	0.375245	1630	tags=30%, list=17%, signal=25%	66515/19878/22339/21812/60611/26365/16456/12741
GO:0002335	GO:0002335	mature B cell differentiation	31	-0.438054	-1.47359	0.0580986	0.365556	0.328884	2808	tags=61%, list=29%, signal=44%	210293/20442/75974/75725/17305/224860/74748/101142/18987/22433/15900/13482/16431/234779/16848/321019/18018/18129/12053
GO:0050853	GO:0050853	B cell receptor signaling pathway	44	-0.438371	-1.57227	0.00932083	0.130077	0.117028	1306	tags=30%, list=14%, signal=26%	234779/56743/107321/16019/227059/12229/105855/12520/74039/101476/17260/17060/16428
GO:0035418	GO:0035418	protein localization to synapse	71	-0.438434	-1.72232	0.000879451	0.033728	0.0303444	1753	tags=37%, list=18%, signal=30%	12889/12300/108155/16572/26414/232370/70546/22318/16574/224997/665113/50791/245666/18164/17762/14811/30957/18190/13385/20614/56216/12217/18762/26875/18191/56508
GO:0070232	GO:0070232	regulation of T cell apoptotic process	35	-0.438451	-1.51649	0.0481928	0.338157	0.304234	1244	tags=29%, list=13%, signal=25%	22163/20723/50996/18950/11501/14605/170770/21940/16197/20304
GO:0031338	GO:0031338	regulation of vesicle fusion	21	-0.438472	-1.36286	0.117229	0.485653	0.436933	2237	tags=57%, list=23%, signal=44%	18783/20983/20979/116838/20910/12889/19339/12890/54525/20980/60510/116837
GO:0002448	GO:0002448	mast cell mediated immunity	34	-0.438575	-1.50095	0.0522648	0.351733	0.316448	2702	tags=47%, list=28%, signal=34%	70450/14389/14158/14159/20910/20619/15368/12890/56632/18806/16190/56743/12229/11542/17423/19215
GO:0006458	GO:0006458	'de novo' protein folding	30	-0.4387	-1.46205	0.0582011	0.365556	0.328884	454	tags=17%, list=5%, signal=16%	193740/12499/67035/76594/15511
GO:0043299	GO:0043299	leukocyte degranulation	52	-0.438765	-1.62951	0.00688016	0.108019	0.0971823	2755	tags=44%, list=29%, signal=32%	11891/70450/14389/14158/16414/19204/14159/20910/11765/20619/15368/12890/56632/18806/16190/56743/22318/12229/105855/11542/19215/16409/72310
GO:0033627	GO:0033627	cell adhesion mediated by integrin	49	-0.439261	-1.61126	0.00622629	0.101448	0.0912708	1677	tags=29%, list=17%, signal=24%	16403/16419/13482/16416/67694/107321/70839/105855/57816/170758/16409/22370/12501/20304
GO:2000107	GO:2000107	negative regulation of leukocyte apoptotic process	45	-0.439633	-1.58458	0.0133072	0.160885	0.144745	1758	tags=36%, list=18%, signal=29%	15251/16453/66612/320404/22163/20723/227059/18950/14605/17289/12774/20315/21940/12775/16197/20304
GO:0097028	GO:0097028	dendritic cell differentiation	26	-0.439641	-1.41873	0.0879713	0.431778	0.388462	3401	tags=62%, list=35%, signal=40%	18733/27215/65963/17096/12608/21950/21813/12326/16364/381319/98365/15900/28240/72147/18129/12775
GO:0046683	GO:0046683	response to organophosphorus	50	-0.439703	-1.61992	0.00619414	0.101366	0.0911971	2675	tags=52%, list=28%, signal=38%	233571/20541/23959/238871/54611/18626/432442/109880/66586/76089/231637/234779/18708/16440/68667/170743/15165/30955/70839/19062/16438/12916/65973/16439/207728/20343
GO:1903053	GO:1903053	regulation of extracellular matrix organization	32	-0.439754	-1.48522	0.0595447	0.368978	0.331962	1397	tags=28%, list=15%, signal=24%	13482/16416/102693/13010/66214/76499/226089/654812/14086
GO:0099054	GO:0099054	presynapse assembly	25	-0.440194	-1.40669	0.0882883	0.431778	0.388462	1270	tags=28%, list=13%, signal=24%	232370/13542/12404/18213/76965/12217/26875
GO:0001569	GO:0001569	branching involved in blood vessel morphogenesis	23	-0.440354	-1.38771	0.0912343	0.435705	0.391995	1414	tags=35%, list=15%, signal=30%	93840/20807/22339/11477/229700/13805/20315/12826
GO:0048259	GO:0048259	regulation of receptor-mediated endocytosis	81	-0.44102	-1.76813	0.000352568	0.0205425	0.0184817	2011	tags=38%, list=21%, signal=31%	233489/140780/20616/16337/18195/77116/94190/73178/18806/12488/227333/16416/22339/234779/213326/18717/109689/52906/72238/18693/232227/12121/108086/50791/18222/13385/268445/20404/23969/12775/22370
GO:0031341	GO:0031341	regulation of cell killing	62	-0.441451	-1.69181	0.00189203	0.0581461	0.052313	1268	tags=31%, list=13%, signal=27%	13051/20723/21355/93694/12946/19294/18950/105855/17057/16002/15007/12628/26365/15042/225825/16768/16409/54698/16197
GO:1990868	GO:1990868	response to chemokine	47	-0.441728	-1.60324	0.00961522	0.1315	0.118308	1815	tags=30%, list=19%, signal=24%	19252/15251/56744/54199/20306/13051/380916/229700/16923/20315/18600/20305/12775/20304
GO:1990869	GO:1990869	cellular response to chemokine	47	-0.441728	-1.60324	0.00961522	0.1315	0.118308	1815	tags=30%, list=19%, signal=24%	19252/15251/56744/54199/20306/13051/380916/229700/16923/20315/18600/20305/12775/20304
GO:0070527	GO:0070527	platelet aggregation	37	-0.442049	-1.54233	0.0241512	0.21823	0.196337	1362	tags=32%, list=14%, signal=28%	16416/18717/233405/16194/70839/11555/16923/12628/26365/16456/26570/22174
GO:0034110	GO:0034110	regulation of homotypic cell-cell adhesion	27	-0.442643	-1.4466	0.0766488	0.410889	0.369669	1122	tags=26%, list=12%, signal=23%	233405/16194/11555/16923/26365/16456/20304
GO:0051085	GO:0051085	chaperone cofactor-dependent protein refolding	24	-0.442649	-1.4091	0.0871886	0.431137	0.387886	454	tags=17%, list=5%, signal=16%	193740/67035/76594/15511
GO:0060193	GO:0060193	positive regulation of lipase activity	29	-0.442729	-1.46802	0.0550622	0.360878	0.324675	475	tags=17%, list=5%, signal=16%	16007/76483/16428/18762/20304
GO:0099565	GO:0099565	chemical synaptic transmission, postsynaptic	63	-0.443306	-1.70431	0.00193367	0.0583598	0.0525052	1668	tags=35%, list=17%, signal=29%	110891/77531/77116/108013/231637/72961/13542/235086/12404/11555/243725/14802/14811/17260/13385/56216/224617/18762/26875/116837/11554/14399
GO:0002763	GO:0002763	positive regulation of myeloid leukocyte differentiation	42	-0.443945	-1.56651	0.0107183	0.141707	0.127491	2927	tags=52%, list=30%, signal=37%	12192/16842/20308/15499/12912/19055/18750/14159/16476/12349/100201/22778/16416/12394/75302/170826/19766/57816/18129/12978/16409/20304
GO:0050953	GO:0050953	sensory perception of light stimulus	44	-0.444071	-1.59271	0.0081476	0.117994	0.106157	657	tags=20%, list=7%, signal=19%	22772/19662/77945/12628/70355/73750/12842/50769/12298
GO:0140238	GO:0140238	presynaptic endocytosis	62	-0.445205	-1.70619	0.00149799	0.0491888	0.0442543	2429	tags=47%, list=25%, signal=35%	269774/11845/13367/20405/12568/20979/64933/71770/233489/20616/20403/56807/94190/54525/72961/218503/18717/22318/224671/74006/104069/20977/218038/20980/103967/224617/20404/13429/23969
GO:0060325	GO:0060325	face morphogenesis	24	-0.445283	-1.41748	0.0800712	0.417087	0.375245	2951	tags=58%, list=31%, signal=41%	226407/71175/16842/244349/77087/16974/74392/328572/414758/65973/71371/101476/30953/12842
GO:0050795	GO:0050795	regulation of behavior	38	-0.446138	-1.56891	0.0165507	0.17998	0.161925	1971	tags=39%, list=21%, signal=32%	17257/16337/16490/13350/14894/52906/22026/105171/11906/17260/13385/19215/18628/217166/11554
GO:0150146	GO:0150146	cell junction disassembly	19	-0.44617	-1.34212	0.123214	0.493636	0.444115	2646	tags=53%, list=28%, signal=38%	12259/26921/23829/11845/12568/13051/18708/232227/21812/16409
GO:0007200	GO:0007200	phospholipase C-activating G protein-coupled receptor signaling pathway	32	-0.446521	-1.50807	0.056042	0.361496	0.325231	1268	tags=41%, list=13%, signal=35%	13609/20866/13051/14676/70839/12121/16438/213438/22063/13618/18796/319430/64337
GO:0060760	GO:0060760	positive regulation of response to cytokine stimulus	41	-0.447369	-1.58046	0.00966619	0.131607	0.118404	2030	tags=39%, list=21%, signal=31%	71586/56480/77128/15251/54123/225471/69807/15944/54131/19766/547253/193740/384309/16145/15511/67445
GO:0016601	GO:0016601	Rac protein signal transduction	37	-0.449361	-1.56785	0.0194516	0.192666	0.173338	2953	tags=62%, list=31%, signal=43%	18015/319939/56212/94176/74018/11845/242687/99167/13860/20262/20401/108155/20430/140580/50884/64652/21844/30955/83767/70497/170758/74769/260299
GO:0070741	GO:0070741	response to interleukin-6	23	-0.449484	-1.41648	0.0822898	0.420768	0.378557	947	tags=43%, list=10%, signal=39%	216161/14158/19255/12606/19697/16194/19766/230594/16195/67445
GO:1905521	GO:1905521	regulation of macrophage migration	34	-0.450362	-1.54129	0.043554	0.319438	0.287393	1268	tags=24%, list=13%, signal=20%	13051/57781/70839/12520/12978/102103/12775/20304
GO:0030195	GO:0030195	negative regulation of blood coagulation	23	-0.45049	-1.41965	0.0805009	0.417375	0.375505	629	tags=26%, list=7%, signal=24%	11555/16923/26365/19128/12490/22370
GO:1900047	GO:1900047	negative regulation of hemostasis	23	-0.45049	-1.41965	0.0805009	0.417375	0.375505	629	tags=26%, list=7%, signal=24%	11555/16923/26365/19128/12490/22370
GO:0030593	GO:0030593	neutrophil chemotaxis	56	-0.450901	-1.68692	0.00224996	0.0614336	0.0552706	770	tags=20%, list=8%, signal=18%	74006/105855/215999/270152/16409/12986/20305/319430/20343/12775/20304
GO:0048011	GO:0048011	neurotrophin TRK receptor signaling pathway	24	-0.450941	-1.4355	0.0782918	0.412304	0.370942	2062	tags=42%, list=21%, signal=33%	20662/81907/20430/24064/74747/225849/83767/20661/17984/319740
GO:0010171	GO:0010171	body morphogenesis	36	-0.451579	-1.56864	0.0256654	0.226965	0.204196	2951	tags=56%, list=31%, signal=39%	71175/16842/244349/77087/76707/237222/16974/109880/226844/74392/328572/50884/102693/414758/76499/65973/71371/101476/30953/12842
GO:0045577	GO:0045577	regulation of B cell differentiation	28	-0.451878	-1.49694	0.0457746	0.327129	0.294312	964	tags=43%, list=10%, signal=39%	234069/320940/74748/22433/22780/12193/18950/105855/74039/16331/12053/21940
GO:0019226	GO:0019226	transmission of nerve impulse	39	-0.452227	-1.59339	0.012125	0.152858	0.137524	2435	tags=54%, list=25%, signal=40%	13483/17136/18858/16485/110876/12286/16490/12300/20273/20266/269116/53321/15165/16508/18213/18479/80297/58802/16531/56508/12298
GO:0036037	GO:0036037	CD8-positive, alpha-beta T cell activation	22	-0.452965	-1.42154	0.0845324	0.425969	0.383236	1279	tags=32%, list=13%, signal=28%	12394/16362/16205/105855/74048/18106/54698
GO:0030219	GO:0030219	megakaryocyte differentiation	35	-0.453147	-1.56732	0.0235612	0.213667	0.192232	1962	tags=43%, list=20%, signal=34%	242687/53621/18718/328572/66663/17132/20807/68235/233405/229700/29809/57816/16923/17260/54368
GO:0051084	GO:0051084	'de novo' post-translational protein folding	29	-0.453182	-1.50268	0.0479574	0.337448	0.303596	454	tags=17%, list=5%, signal=16%	193740/12499/67035/76594/15511
GO:0016079	GO:0016079	synaptic vesicle exocytosis	77	-0.453282	-1.80172	0.000310183	0.0191631	0.0172407	2212	tags=47%, list=23%, signal=36%	20983/20979/18750/116838/20910/78808/20619/27062/109880/26431/12286/12889/19339/20615/12890/54525/208898/13542/64051/13017/22318/207227/320405/74006/20977/242662/241770/20980/60510/20614/56216/213760/26875/116837/19894/12298
GO:0045666	GO:0045666	positive regulation of neuron differentiation	54	-0.453402	-1.67893	0.00362376	0.0819951	0.0737695	508	tags=17%, list=5%, signal=16%	12053/320705/12774/30957/17260/20315/58198/18546/20304
GO:0007628	GO:0007628	adult walking behavior	29	-0.453631	-1.50417	0.0479574	0.337448	0.303596	387	tags=17%, list=4%, signal=17%	17762/80297/16531/57754/12298
GO:0033081	GO:0033081	regulation of T cell differentiation in thymus	19	-0.453766	-1.36498	0.108929	0.470045	0.422891	754	tags=21%, list=8%, signal=19%	269023/11501/229473/16197
GO:1903861	GO:1903861	positive regulation of dendrite extension	19	-0.454924	-1.36846	0.108929	0.470045	0.422891	2212	tags=47%, list=23%, signal=37%	20983/20979/116838/233489/17257/20403/18786/20980/116837
GO:0001914	GO:0001914	regulation of T cell mediated cytotoxicity	24	-0.456175	-1.45216	0.0765125	0.410889	0.369669	1044	tags=29%, list=11%, signal=26%	21355/19294/18950/105855/15007/15042/16197
GO:0007269	GO:0007269	neurotransmitter secretion	105	-0.456264	-1.91556	9.87701e-06	0.00188108	0.00169237	2306	tags=48%, list=24%, signal=37%	18747/67760/20983/20979/18750/116838/20910/78808/20619/20616/27204/27062/109880/26431/12286/12889/381979/20965/108030/19339/22433/20615/12890/54525/208898/13542/64051/13017/22318/207227/320405/74006/16504/20977/243725/242662/18479/18190/17260/241770/20980/60510/20614/56216/213760/26875/18191/116837/19894/12298
GO:0099643	GO:0099643	signal release from synapse	105	-0.456264	-1.91556	9.87701e-06	0.00188108	0.00169237	2306	tags=48%, list=24%, signal=37%	18747/67760/20983/20979/18750/116838/20910/78808/20619/20616/27204/27062/109880/26431/12286/12889/381979/20965/108030/19339/22433/20615/12890/54525/208898/13542/64051/13017/22318/207227/320405/74006/16504/20977/243725/242662/18479/18190/17260/241770/20980/60510/20614/56216/213760/26875/18191/116837/19894/12298
GO:0010559	GO:0010559	regulation of glycoprotein biosynthetic process	28	-0.456615	-1.51263	0.0341456	0.272731	0.245371	1889	tags=43%, list=20%, signal=35%	56321/51801/16337/328572/16453/239528/16431/68059/99011/170789/17751/12775
GO:0014911	GO:0014911	positive regulation of smooth muscle cell migration	39	-0.45721	-1.61095	0.0103095	0.137753	0.123934	376	tags=26%, list=4%, signal=25%	231637/16416/14180/238130/18479/16195/11504/56508/22370/20304
GO:0072678	GO:0072678	T cell migration	48	-0.457225	-1.66734	0.00452364	0.0911218	0.0819806	1362	tags=23%, list=14%, signal=20%	16416/57781/380916/321019/11501/20315/16456/12775/11815/12458/20304
GO:0016188	GO:0016188	synaptic vesicle maturation	24	-0.457347	-1.45589	0.0747331	0.408677	0.367679	2066	tags=50%, list=21%, signal=39%	66335/12725/20910/233489/19339/20615/72961/208898/75965/13385/76252/66237
GO:0060323	GO:0060323	head morphogenesis	28	-0.457986	-1.51717	0.0325575	0.263821	0.237355	1982	tags=54%, list=21%, signal=43%	71175/16842/244349/77087/16974/109880/226844/74392/328572/414758/65973/71371/101476/30953/12842
GO:0099633	GO:0099633	protein localization to postsynaptic specialization membrane	26	-0.457991	-1.47795	0.05386	0.357454	0.321595	652	tags=31%, list=7%, signal=29%	665113/50791/245666/18164/13385/18762/18191/56508
GO:0099645	GO:0099645	neurotransmitter receptor localization to postsynaptic specialization membrane	26	-0.457991	-1.47795	0.05386	0.357454	0.321595	652	tags=31%, list=7%, signal=29%	665113/50791/245666/18164/13385/18762/18191/56508
GO:0048488	GO:0048488	synaptic vesicle endocytosis	59	-0.458483	-1.73764	0.00102322	0.0375231	0.0337588	2391	tags=47%, list=25%, signal=36%	11845/13367/20405/12568/20979/64933/71770/233489/20616/20403/56807/94190/54525/72961/218503/18717/22318/224671/74006/104069/20977/218038/20980/103967/224617/20404/13429/23969
GO:0031112	GO:0031112	positive regulation of microtubule polymerization or depolymerization	30	-0.459584	-1.53166	0.0233514	0.212227	0.190937	2138	tags=43%, list=22%, signal=34%	14159/13191/328108/17257/26419/56430/214444/193740/17762/18479/260315/14544/15511
GO:0006688	GO:0006688	glycosphingolipid biosynthetic process	19	-0.459953	-1.38358	0.101786	0.454957	0.409316	1611	tags=42%, list=17%, signal=35%	56336/56386/57370/68059/22234/20452/20441/20444
GO:2001259	GO:2001259	positive regulation of cation channel activity	35	-0.460114	-1.59142	0.0196988	0.193194	0.173813	2714	tags=49%, list=28%, signal=35%	116873/233571/19055/12568/432442/16485/109676/12293/69179/20866/234779/13040/15165/65973/16502/11554/12298
GO:0001573	GO:0001573	ganglioside metabolic process	18	-0.460889	-1.36187	0.114082	0.480829	0.432593	2097	tags=33%, list=22%, signal=26%	56336/56386/15212/20452/20441/20444
GO:0010517	GO:0010517	regulation of phospholipase activity	31	-0.461035	-1.5509	0.0367925	0.285697	0.257036	748	tags=23%, list=8%, signal=21%	18786/12323/12121/16007/16428/18762/20304
GO:0051937	GO:0051937	catecholamine transport	40	-0.461153	-1.6267	0.00731192	0.109985	0.0989517	2212	tags=45%, list=23%, signal=35%	20983/20979/17257/27062/16490/19339/17069/54525/64652/80976/12495/19224/70839/11542/20980/20315/60510/18546
GO:0038179	GO:0038179	neurotrophin signaling pathway	29	-0.461363	-1.5298	0.0472669	0.334034	0.300524	2062	tags=41%, list=21%, signal=33%	20662/76089/81907/20430/24064/74747/225849/83767/20661/50791/17984/319740
GO:0001937	GO:0001937	negative regulation of endothelial cell proliferation	21	-0.462276	-1.43685	0.071048	0.400838	0.360626	858	tags=33%, list=9%, signal=30%	66214/19274/21812/20692/22084/13805/17260
GO:0070098	GO:0070098	chemokine-mediated signaling pathway	38	-0.462356	-1.62594	0.0104392	0.138748	0.124829	1758	tags=32%, list=18%, signal=26%	15251/56744/54199/20306/13051/229700/16923/20315/18600/20305/12775/20304
GO:1903018	GO:1903018	regulation of glycoprotein metabolic process	30	-0.462555	-1.54156	0.0212406	0.200346	0.180248	1889	tags=37%, list=20%, signal=30%	16337/328572/16453/239528/16431/13010/68059/99011/170789/17751/12775
GO:0048246	GO:0048246	macrophage chemotaxis	30	-0.462949	-1.54287	0.0212406	0.200346	0.180248	518	tags=17%, list=5%, signal=16%	12978/13618/102103/12775/20304
GO:0010803	GO:0010803	regulation of tumor necrosis factor-mediated signaling pathway	27	-0.463644	-1.51523	0.0516934	0.350483	0.315323	940	tags=44%, list=10%, signal=40%	21937/106025/19255/432940/69807/17951/19766/17948/67338/193740/263876/15511
GO:0048679	GO:0048679	regulation of axon regeneration	21	-0.464976	-1.44524	0.0674956	0.39202	0.352694	2113	tags=43%, list=22%, signal=34%	16600/109880/259277/223255/269473/18213/237847/16001/19242
GO:0061515	GO:0061515	myeloid cell development	59	-0.465727	-1.7651	0.000729023	0.0308393	0.0277456	2230	tags=41%, list=23%, signal=31%	242687/16969/238247/226844/18718/328572/233328/20807/233405/11655/224109/29809/16598/67017/50754/18129/12978/12053/16923/319653/54368/16409/110257/15122
GO:0017158	GO:0017158	regulation of calcium ion-dependent exocytosis	28	-0.465858	-1.54325	0.0267344	0.230779	0.207628	2252	tags=50%, list=23%, signal=38%	12568/20983/20979/20910/27062/12286/56807/19339/54525/80976/22318/20980/60510/19894
GO:1903307	GO:1903307	positive regulation of regulated secretory pathway	34	-0.4659	-1.59446	0.0152475	0.170609	0.153494	2755	tags=62%, list=29%, signal=44%	11891/70450/14389/16414/19204/12568/20983/20979/20910/11765/27062/56807/19339/56632/54525/18806/16190/74006/11542/60510/16409
GO:0048247	GO:0048247	lymphocyte chemotaxis	34	-0.466105	-1.59516	0.0152475	0.170609	0.153494	746	tags=24%, list=8%, signal=22%	12642/321019/11501/20315/18600/20305/12775/20304
GO:0046513	GO:0046513	ceramide biosynthetic process	43	-0.466262	-1.66083	0.00422793	0.0880849	0.0792484	2097	tags=42%, list=22%, signal=33%	56336/77626/18753/67260/56386/66612/56632/57370/241447/67630/22234/20452/53357/208449/16007/20441/20597/20444
GO:0032703	GO:0032703	negative regulation of interleukin-2 production	18	-0.466364	-1.37805	0.110517	0.472945	0.4255	784	tags=22%, list=8%, signal=20%	81601/260315/16768/12490
GO:0001910	GO:0001910	regulation of leukocyte mediated cytotoxicity	55	-0.466816	-1.74286	0.000632645	0.029659	0.0266837	1268	tags=31%, list=13%, signal=27%	13051/20723/21355/93694/19294/18950/105855/17057/16002/15007/26365/15042/225825/16768/16409/54698/16197
GO:0006672	GO:0006672	ceramide metabolic process	58	-0.467065	-1.759	0.00182949	0.0578072	0.0520081	2097	tags=41%, list=22%, signal=33%	56336/230101/77626/18753/67260/56386/66612/192654/56632/57370/241447/67630/68059/22234/15212/66190/20452/53357/208449/16007/20441/20597/20444/19012
GO:0002686	GO:0002686	negative regulation of leukocyte migration	27	-0.467251	-1.52702	0.0516934	0.350483	0.315323	1815	tags=41%, list=19%, signal=33%	17470/19252/74748/73178/13482/57781/380916/20315/18600/319430/11815
GO:0045123	GO:0045123	cellular extravasation	50	-0.467345	-1.72176	0.00208147	0.0590261	0.0531047	666	tags=22%, list=7%, signal=21%	11501/67374/14537/20345/20315/270152/16456/16409/20343/114332/20304
GO:0071277	GO:0071277	cellular response to calcium ion	47	-0.467721	-1.69758	0.00348225	0.0806212	0.0725334	2628	tags=60%, list=27%, signal=43%	18013/13605/232341/16477/20983/20979/16476/16478/18021/109880/233908/70568/66972/54525/320404/28240/234779/11690/54153/94178/12335/80976/17258/65973/20597/17260/20980/60510
GO:0043302	GO:0043302	positive regulation of leukocyte degranulation	19	-0.467815	-1.40724	0.0875	0.431727	0.388417	2619	tags=53%, list=27%, signal=38%	14389/16414/19204/20910/11765/56632/18806/16190/11542/16409
GO:0071260	GO:0071260	cellular response to mechanical stimulus	22	-0.467899	-1.46841	0.0701439	0.398646	0.358654	375	tags=18%, list=4%, signal=18%	207728/16456/98660/12842
GO:0042461	GO:0042461	photoreceptor cell development	19	-0.46842	-1.40905	0.0875	0.431727	0.388417	2464	tags=53%, list=26%, signal=39%	18591/544752/236266/12142/22339/52906/15165/77945/12628/229759
GO:0030239	GO:0030239	myofibril assembly	28	-0.469123	-1.55406	0.025154	0.224067	0.201589	1433	tags=36%, list=15%, signal=30%	328572/170731/20807/12335/12632/21916/50876/17258/17260/17868
GO:0055002	GO:0055002	striated muscle cell development	28	-0.469123	-1.55406	0.025154	0.224067	0.201589	1433	tags=36%, list=15%, signal=30%	328572/170731/20807/12335/12632/21916/50876/17258/17260/17868
GO:0031113	GO:0031113	regulation of microtubule polymerization	47	-0.469581	-1.70433	0.00335207	0.0790714	0.0711391	2138	tags=45%, list=22%, signal=35%	14159/13191/328108/230101/17257/54126/76686/26419/56430/214444/76499/100732/13548/193740/17762/20393/18479/22153/260315/14544/15511
GO:0030212	GO:0030212	hyaluronan metabolic process	19	-0.469907	-1.41353	0.0857143	0.428886	0.38586	892	tags=21%, list=9%, signal=19%	15212/27416/209378/114332
GO:0071875	GO:0071875	adrenergic receptor signaling pathway	17	-0.470265	-1.3711	0.12478	0.497537	0.447625	662	tags=24%, list=7%, signal=22%	105171/11555/11515/11554
GO:0061384	GO:0061384	heart trabecula morphogenesis	19	-0.47198	-1.41976	0.0857143	0.428886	0.38586	2062	tags=42%, list=21%, signal=33%	20662/13609/20807/21812/19662/18018/13805/11504
GO:1905523	GO:1905523	positive regulation of macrophage migration	21	-0.472052	-1.46724	0.062167	0.376632	0.338849	789	tags=24%, list=8%, signal=22%	13051/70839/12978/12775/20304
GO:2000401	GO:2000401	regulation of lymphocyte migration	46	-0.473001	-1.71016	0.0041544	0.0876962	0.0788986	1549	tags=28%, list=16%, signal=24%	73178/20306/16416/57781/380916/11501/67374/20315/18600/12775/11815/12458/20304
GO:0032633	GO:0032633	interleukin-4 production	25	-0.47337	-1.5127	0.0486486	0.34088	0.306683	527	tags=16%, list=5%, signal=15%	18129/16428/18762/12501
GO:0014046	GO:0014046	dopamine secretion	24	-0.47337	-1.50689	0.0569395	0.36348	0.327016	2417	tags=50%, list=25%, signal=38%	68943/20983/20979/16490/19339/54525/80976/12495/20980/20315/60510/18546
GO:0014059	GO:0014059	regulation of dopamine secretion	24	-0.47337	-1.50689	0.0569395	0.36348	0.327016	2417	tags=50%, list=25%, signal=38%	68943/20983/20979/16490/19339/54525/80976/12495/20980/20315/60510/18546
GO:0099601	GO:0099601	regulation of neurotransmitter receptor activity	38	-0.4754	-1.67181	0.00693792	0.108153	0.0973031	910	tags=32%, list=9%, signal=29%	18693/435145/224997/11555/260297/18164/14811/18190/17260/13385/19894/50932
GO:0002707	GO:0002707	negative regulation of lymphocyte mediated immunity	28	-0.475538	-1.57531	0.0206764	0.198064	0.178195	1226	tags=39%, list=13%, signal=34%	17131/20723/21355/93694/12946/105855/16002/12053/26365/74048/16197
GO:1900271	GO:1900271	regulation of long-term synaptic potentiation	37	-0.47577	-1.65999	0.00824906	0.11909	0.107143	500	tags=24%, list=5%, signal=23%	243725/208922/18479/19242/12307/432530/12308/382056/11554
GO:0030947	GO:0030947	regulation of vascular endothelial growth factor receptor signaling pathway	19	-0.476762	-1.43415	0.075	0.408677	0.367679	660	tags=37%, list=7%, signal=34%	15251/14180/13855/69601/14366/260299/17751
GO:2000300	GO:2000300	regulation of synaptic vesicle exocytosis	40	-0.47701	-1.68264	0.00462121	0.0921374	0.0828944	2683	tags=55%, list=28%, signal=40%	228545/72194/20964/12361/20983/20979/18750/116838/78808/109880/26431/19339/20615/13542/207227/74006/20977/242662/241770/213760/116837/12298
GO:0021801	GO:0021801	cerebral cortex radial glia-guided migration	19	-0.477228	-1.43555	0.0732143	0.403764	0.363259	1490	tags=42%, list=16%, signal=36%	77582/12568/192157/223697/70839/14766/69601/14270
GO:0022030	GO:0022030	telencephalon glial cell migration	19	-0.477228	-1.43555	0.0732143	0.403764	0.363259	1490	tags=42%, list=16%, signal=36%	77582/12568/192157/223697/70839/14766/69601/14270
GO:0002762	GO:0002762	negative regulation of myeloid leukocyte differentiation	32	-0.477319	-1.61209	0.0155896	0.172516	0.15521	1279	tags=34%, list=13%, signal=30%	12394/18708/16658/68027/72147/93694/234515/16331/50754/26365/18725
GO:0035886	GO:0035886	vascular associated smooth muscle cell differentiation	23	-0.478355	-1.50746	0.0518784	0.351114	0.315891	1641	tags=43%, list=17%, signal=36%	18569/93840/20807/14180/22339/67155/18018/12628/13805/54409
GO:0045672	GO:0045672	positive regulation of osteoclast differentiation	22	-0.478465	-1.50156	0.0593525	0.368978	0.331962	1367	tags=32%, list=14%, signal=27%	100201/16416/75302/170826/18129/12978/20304
GO:0050433	GO:0050433	regulation of catecholamine secretion	30	-0.478852	-1.59587	0.0146442	0.16721	0.150436	2417	tags=50%, list=25%, signal=38%	68943/20983/20979/16490/19339/54525/80976/12495/19224/70839/11542/20980/20315/60510/18546
GO:0001961	GO:0001961	positive regulation of cytokine-mediated signaling pathway	37	-0.480435	-1.67627	0.00669022	0.105933	0.0953056	2030	tags=41%, list=21%, signal=32%	56480/77128/15251/54123/225471/69807/15944/54131/19766/547253/193740/384309/16145/15511/67445
GO:0044275	GO:0044275	cellular carbohydrate catabolic process	24	-0.480653	-1.53008	0.0551601	0.360878	0.324675	2103	tags=33%, list=22%, signal=26%	77559/110078/244416/12421/68961/18642/15483/11554
GO:0019228	GO:0019228	neuronal action potential	20	-0.481544	-1.46609	0.0597826	0.368978	0.331962	2435	tags=55%, list=25%, signal=41%	13483/18858/16485/110876/16490/20273/15165/16508/58802/16531/56508
GO:2000463	GO:2000463	positive regulation of excitatory postsynaptic potential	26	-0.482341	-1.55653	0.0358996	0.283908	0.255426	629	tags=35%, list=7%, signal=32%	231637/13542/11555/14811/13385/56216/224617/18762/116837
GO:0032958	GO:0032958	inositol phosphate biosynthetic process	16	-0.482937	-1.39291	0.119089	0.487503	0.438598	3272	tags=62%, list=34%, signal=41%	76500/20617/327655/233571/19204/69718/320404/234779/27399/18106
GO:0050805	GO:0050805	negative regulation of synaptic transmission	33	-0.483594	-1.64942	0.00980791	0.13246	0.119171	1687	tags=36%, list=18%, signal=30%	23945/20807/66082/15165/18693/12404/245666/53357/243725/260297/17762/56508
GO:0051497	GO:0051497	negative regulation of stress fiber assembly	19	-0.483651	-1.45487	0.0660714	0.388024	0.349098	1253	tags=58%, list=13%, signal=50%	76707/242687/13609/18708/76499/235431/19062/233977/243725/21872/16456
GO:0036465	GO:0036465	synaptic vesicle recycling	70	-0.485685	-1.90242	0.00014236	0.0115797	0.010418	2391	tags=50%, list=25%, signal=38%	11845/13367/20405/12568/20979/64933/71770/233489/20616/20403/26431/108012/56807/20430/94190/19339/18786/54525/72961/218503/18717/22318/224671/74006/104069/20977/218038/20980/103967/56216/224617/26875/20404/13429/23969
GO:0071320	GO:0071320	cellular response to cAMP	21	-0.485699	-1.50965	0.053286	0.355523	0.319857	2587	tags=57%, list=27%, signal=42%	12192/20541/238871/432442/76089/16440/15165/30955/19062/16438/16439/207728
GO:0051932	GO:0051932	synaptic transmission, GABAergic	32	-0.485892	-1.64104	0.011928	0.151474	0.136278	2488	tags=47%, list=26%, signal=35%	12725/12752/12349/20910/18754/224860/14406/232370/227120/64652/170758/18479/242425/14394/14399
GO:0031116	GO:0031116	positive regulation of microtubule polymerization	28	-0.487131	-1.61372	0.0167255	0.181488	0.163282	2138	tags=46%, list=22%, signal=36%	14159/13191/328108/17257/26419/56430/214444/193740/17762/18479/260315/14544/15511
GO:1904861	GO:1904861	excitatory synapse assembly	22	-0.488728	-1.53377	0.0467626	0.332299	0.298963	734	tags=32%, list=8%, signal=29%	12404/18213/18164/217692/18190/14270/18191
GO:2000406	GO:2000406	positive regulation of T cell migration	26	-0.489622	-1.58002	0.0310411	0.255265	0.229657	666	tags=15%, list=7%, signal=14%	11501/20315/12775/20304
GO:1902476	GO:1902476	chloride transmembrane transport	18	-0.489936	-1.4477	0.0695187	0.396793	0.356987	1173	tags=44%, list=12%, signal=39%	57138/14406/241296/107723/83704/20512/14394/14399
GO:1904752	GO:1904752	regulation of vascular associated smooth muscle cell migration	22	-0.489953	-1.53762	0.044964	0.324568	0.292008	2953	tags=45%, list=31%, signal=32%	18015/14673/18591/11977/231637/14180/238130/18479/17260/11504
GO:0097484	GO:0097484	dendrite extension	31	-0.490261	-1.64921	0.0159354	0.174421	0.156924	2264	tags=45%, list=24%, signal=35%	213084/20983/20979/116838/233489/17257/20403/81907/20430/18786/83767/20980/20404/116837
GO:0035855	GO:0035855	megakaryocyte development	18	-0.490352	-1.44893	0.0695187	0.396793	0.356987	2230	tags=44%, list=23%, signal=34%	242687/18718/328572/20807/233405/29809/16923/54368
GO:0035020	GO:0035020	regulation of Rac protein signal transduction	21	-0.490561	-1.52477	0.0497336	0.342504	0.308145	2953	tags=57%, list=31%, signal=40%	18015/319939/94176/11845/99167/20262/20401/108155/30955/70497/74769/260299
GO:0019886	GO:0019886	antigen processing and presentation of exogenous peptide antigen via MHC class II	15	-0.490707	-1.39003	0.108156	0.469277	0.4222	1125	tags=27%, list=12%, signal=24%	54445/13040/15001/15002
GO:0071354	GO:0071354	cellular response to interleukin-6	22	-0.492491	-1.54558	0.0521884	0.351733	0.316448	947	tags=73%, list=10%, signal=66%	14388/240690/20779/17863/98496/20848/216161/14158/19255/12606/19697/16194/19766/230594/16195/67445
GO:0002090	GO:0002090	regulation of receptor internalization	50	-0.493692	-1.81882	0.000611128	0.0295222	0.0265606	1889	tags=42%, list=20%, signal=34%	16337/18195/77116/94190/16416/22339/234779/213326/18717/109689/52906/72238/18693/232227/108086/50791/18222/13385/268445/20404/23969
GO:0002230	GO:0002230	positive regulation of defense response to virus by host	17	-0.494899	-1.44292	0.086116	0.429117	0.386069	2	tags=35%, list=0%, signal=35%	230738/383619/18854/15519/27103/20304
GO:0006821	GO:0006821	chloride transport	35	-0.495411	-1.7135	0.00672621	0.105933	0.0953056	1277	tags=34%, list=13%, signal=30%	12728/72961/241296/107723/229725/83704/20512/57776/18669/14403/14394/14399
GO:0006953	GO:0006953	acute-phase response	17	-0.495923	-1.44591	0.0843585	0.425947	0.383217	357	tags=24%, list=4%, signal=23%	12774/13618/93671/20304
GO:0060317	GO:0060317	cardiac epithelial to mesenchymal transition	14	-0.497019	-1.36656	0.125455	0.499037	0.448974	2565	tags=43%, list=27%, signal=31%	67888/21813/18569/11477/21812/13805
GO:0003209	GO:0003209	cardiac atrium morphogenesis	15	-0.498025	-1.41076	0.0992908	0.450766	0.405546	2236	tags=47%, list=23%, signal=36%	12168/20662/16974/11477/18129/16007/13805
GO:0002092	GO:0002092	positive regulation of receptor internalization	20	-0.49846	-1.51759	0.048913	0.341304	0.307065	1316	tags=45%, list=14%, signal=39%	16337/22339/234779/213326/109689/52906/72238/18693/50791
GO:1900095	GO:1900095	regulation of dosage compensation by inactivation of X chromosome	14	-0.498798	-1.37145	0.121818	0.49225	0.442868	2935	tags=64%, list=31%, signal=45%	74026/78878/67773/69612/226976/76719/108155/77853/70252
GO:0009593	GO:0009593	detection of chemical stimulus	16	-0.500122	-1.44248	0.089317	0.433512	0.390023	365	tags=56%, list=4%, signal=54%	12314/24088/20778/21897/20979/20866/13805/58802/18796
GO:0048172	GO:0048172	regulation of short-term neuronal synaptic plasticity	14	-0.500899	-1.37722	0.118182	0.487451	0.438551	2636	tags=64%, list=27%, signal=47%	226407/94229/20964/12752/20983/110891/19339/435145/20977
GO:0090025	GO:0090025	regulation of monocyte chemotaxis	16	-0.501245	-1.44572	0.0875657	0.431727	0.388417	1815	tags=31%, list=19%, signal=25%	19252/74748/13051/20315/20304
GO:0070861	GO:0070861	regulation of protein exit from endoplasmic reticulum	15	-0.503394	-1.42597	0.0921986	0.438272	0.394305	2186	tags=47%, list=23%, signal=36%	192193/99237/22213/66753/68889/70297/12520
GO:0042698	GO:0042698	ovulation cycle	31	-0.504104	-1.69578	0.00963215	0.1315	0.118308	1433	tags=39%, list=15%, signal=33%	170731/12394/244891/268903/109689/101476/14366/16001/19242/30953/11504/22174
GO:0033032	GO:0033032	regulation of myeloid cell apoptotic process	29	-0.504172	-1.67175	0.0128908	0.158734	0.14281	357	tags=17%, list=4%, signal=17%	12774/17260/74769/26570/20304
GO:0002673	GO:0002673	regulation of acute inflammatory response	27	-0.504267	-1.64799	0.0190676	0.19211	0.172838	1219	tags=33%, list=13%, signal=29%	11690/192195/30955/12229/11501/12774/13618/12775/20304
GO:0045670	GO:0045670	regulation of osteoclast differentiation	49	-0.50494	-1.85218	0.000488733	0.025577	0.0230112	1367	tags=35%, list=14%, signal=30%	100201/16416/75302/18708/170826/16658/68027/93694/234515/11501/16331/50754/18129/12978/26365/18725/20304
GO:0097320	GO:0097320	plasma membrane tubulation	14	-0.50549	-1.38985	0.109091	0.470045	0.422891	1790	tags=43%, list=19%, signal=35%	13196/73178/434204/170625/20404/23969
GO:0018904	GO:0018904	ether metabolic process	14	-0.50589	-1.39095	0.109091	0.470045	0.422891	2237	tags=43%, list=23%, signal=33%	18783/270084/16890/67420/13849/319660
GO:0042462	GO:0042462	eye photoreceptor cell development	16	-0.506238	-1.46012	0.0788091	0.41416	0.372612	2464	tags=56%, list=26%, signal=42%	18591/236266/12142/22339/52906/15165/77945/12628/229759
GO:0060674	GO:0060674	placenta blood vessel development	21	-0.506447	-1.57414	0.0408579	0.306786	0.27601	911	tags=52%, list=9%, signal=48%	15205/18194/93760/16477/12702/229700/18763/18129/16007/56406/20732
GO:0044790	GO:0044790	suppression of viral release by host	15	-0.508598	-1.44071	0.0851064	0.428002	0.385066	323	tags=73%, list=3%, signal=71%	93679/667823/22670/94091/20128/66854/18854/69807/76681/384309/209387
GO:0098884	GO:0098884	postsynaptic neurotransmitter receptor internalization	26	-0.509603	-1.6445	0.0173244	0.18518	0.166603	1574	tags=35%, list=16%, signal=29%	94190/16416/18717/18693/232227/108086/18222/103967/23969
GO:0140239	GO:0140239	postsynaptic endocytosis	26	-0.509603	-1.6445	0.0173244	0.18518	0.166603	1574	tags=35%, list=16%, signal=29%	94190/16416/18717/18693/232227/108086/18222/103967/23969
GO:1902622	GO:1902622	regulation of neutrophil migration	28	-0.510977	-1.69271	0.0095011	0.131241	0.118075	770	tags=25%, list=8%, signal=23%	74006/105855/11501/215999/319430/20343/12775
GO:1900242	GO:1900242	regulation of synaptic vesicle endocytosis	21	-0.511055	-1.58846	0.0365852	0.28552	0.256877	2293	tags=52%, list=24%, signal=40%	20405/233489/20616/56807/94190/54525/72961/18717/224671/74006/13429
GO:0050432	GO:0050432	catecholamine secretion	34	-0.511229	-1.74959	0.00403259	0.0865801	0.0778945	2212	tags=56%, list=23%, signal=43%	68943/20983/20979/17257/27062/16490/19339/17069/54525/64652/80976/12495/19224/70839/11542/20980/20315/60510/18546
GO:0002507	GO:0002507	tolerance induction	15	-0.511631	-1.4493	0.0797872	0.416685	0.374884	31	tags=60%, list=0%, signal=60%	54167/17096/208650/21813/16396/171285/12394/12775/12501
GO:0045214	GO:0045214	sarcomere organization	18	-0.512054	-1.51306	0.0552585	0.360878	0.324675	1839	tags=39%, list=19%, signal=32%	328572/170731/20807/12335/12632/17260/17868
GO:0097091	GO:0097091	synaptic vesicle clustering	16	-0.51258	-1.47841	0.0700525	0.398578	0.358593	2011	tags=50%, list=21%, signal=40%	233489/20616/27204/20965/19339/50791/12217/26875
GO:0007622	GO:0007622	rhythmic behavior	32	-0.512615	-1.73129	0.00580498	0.0996953	0.0896941	883	tags=31%, list=9%, signal=28%	229599/224671/16508/11906/16531/353187/19215/18628/217166/11554
GO:0032924	GO:0032924	activin receptor signaling pathway	19	-0.512646	-1.54209	0.0555795	0.361496	0.325231	3534	tags=68%, list=37%, signal=43%	17127/228839/17126/269878/11480/17684/11481/14180/17131/11477/21812/22772/50791
GO:0055078	GO:0055078	sodium ion homeostasis	21	-0.512664	-1.59347	0.0328467	0.265735	0.239077	731	tags=33%, list=8%, signal=31%	57816/20512/11931/11932/20393/13618/98660
GO:0042269	GO:0042269	regulation of natural killer cell mediated cytotoxicity	28	-0.514326	-1.70381	0.00871482	0.124384	0.111906	1135	tags=46%, list=12%, signal=41%	11765/171285/52118/20723/21355/93694/19294/17057/16002/26365/225825/16768/54698
GO:0045579	GO:0045579	positive regulation of B cell differentiation	13	-0.514404	-1.37895	0.107664	0.469277	0.4222	2376	tags=54%, list=25%, signal=41%	234069/320940/22433/18950/105855/16331/21940
GO:2000404	GO:2000404	regulation of T cell migration	36	-0.515272	-1.78989	0.00335235	0.0790714	0.0711391	1362	tags=25%, list=14%, signal=22%	16416/57781/380916/11501/20315/12775/11815/12458/20304
GO:0010640	GO:0010640	regulation of platelet-derived growth factor receptor signaling pathway	14	-0.515679	-1.41786	0.0945455	0.441857	0.397531	3717	tags=79%, list=39%, signal=48%	20779/15239/16332/20617/208650/75725/19255/19271/234593/269473/11815
GO:0014002	GO:0014002	astrocyte development	24	-0.515773	-1.64188	0.0125164	0.154942	0.139398	1182	tags=29%, list=12%, signal=26%	16835/18992/15979/12978/18823/217166/17751
GO:0010763	GO:0010763	positive regulation of fibroblast migration	14	-0.516508	-1.42014	0.0945455	0.441857	0.397531	2587	tags=57%, list=27%, signal=42%	20541/67384/18591/18754/16416/22084/83397/18479
GO:0001780	GO:0001780	neutrophil homeostasis	23	-0.517841	-1.6319	0.0263619	0.229139	0.206152	878	tags=43%, list=9%, signal=40%	108156/320404/12229/17289/12978/16923/12628/74769/26570/16409
GO:0046629	GO:0046629	gamma-delta T cell activation	13	-0.518103	-1.38886	0.104015	0.462042	0.415691	740	tags=23%, list=8%, signal=21%	105855/270152/16428
GO:0002715	GO:0002715	regulation of natural killer cell mediated immunity	29	-0.51826	-1.71847	0.00852779	0.12241	0.11013	1788	tags=48%, list=19%, signal=39%	11765/171285/52118/13482/20723/21355/93694/19294/17057/16002/26365/225825/16768/54698
GO:0002347	GO:0002347	response to tumor cell	26	-0.518433	-1.673	0.0141014	0.165241	0.148664	1788	tags=42%, list=19%, signal=35%	171285/52118/56338/19697/19294/66610/18129/26365/225825/54698/72310
GO:0090308	GO:0090308	regulation of DNA methylation-dependent heterochromatin formation	16	-0.518958	-1.49681	0.0665499	0.388775	0.349774	620	tags=25%, list=6%, signal=23%	13548/54343/52463/218850
GO:0048499	GO:0048499	synaptic vesicle membrane organization	25	-0.519044	-1.65866	0.0249345	0.222902	0.200541	2181	tags=56%, list=23%, signal=43%	20979/116838/20910/20619/12889/19339/20615/12890/54525/20980/60510/20614/56216/116837
GO:0033028	GO:0033028	myeloid cell apoptotic process	33	-0.521274	-1.77793	0.00294246	0.0738949	0.0664819	357	tags=18%, list=4%, signal=18%	12774/17260/74769/26570/16409/20304
GO:0045061	GO:0045061	thymic T cell selection	20	-0.5217	-1.58834	0.0329565	0.266195	0.239491	33	tags=25%, list=0%, signal=25%	20807/320404/50932/12775/12501
GO:0031294	GO:0031294	lymphocyte costimulation	17	-0.522222	-1.52258	0.0527241	0.352711	0.317327	1493	tags=35%, list=16%, signal=30%	24099/13482/12520/12519/12775/12501
GO:0031295	GO:0031295	T cell costimulation	17	-0.522222	-1.52258	0.0527241	0.352711	0.317327	1493	tags=35%, list=16%, signal=30%	24099/13482/12520/12519/12775/12501
GO:0048260	GO:0048260	positive regulation of receptor-mediated endocytosis	39	-0.523371	-1.84407	0.000711242	0.0308393	0.0277456	1889	tags=41%, list=20%, signal=33%	16337/18195/73178/18806/227333/22339/234779/213326/109689/52906/72238/18693/12121/50791/12775/22370
GO:0045217	GO:0045217	cell-cell junction maintenance	13	-0.523409	-1.40309	0.100365	0.45304	0.407592	1124	tags=38%, list=12%, signal=34%	53321/12978/21872/56513/73750
GO:0045648	GO:0045648	positive regulation of erythrocyte differentiation	21	-0.524662	-1.63076	0.0243145	0.218526	0.196604	740	tags=24%, list=8%, signal=22%	105855/67017/16331/193740/15511
GO:2000310	GO:2000310	regulation of NMDA receptor activity	18	-0.524768	-1.55063	0.0463458	0.330271	0.297139	369	tags=22%, list=4%, signal=21%	14811/17260/13385/19894
GO:0048821	GO:0048821	erythrocyte development	27	-0.527123	-1.72269	0.0112119	0.146217	0.131549	2196	tags=44%, list=23%, signal=34%	16969/238247/226844/20807/11655/16598/67017/12053/16923/319653/110257/15122
GO:0062099	GO:0062099	negative regulation of programmed necrotic cell death	12	-0.528466	-1.38742	0.119048	0.487503	0.438598	835	tags=25%, list=9%, signal=23%	19766/11796/11797
GO:0086004	GO:0086004	regulation of cardiac muscle cell contraction	16	-0.528804	-1.5252	0.056042	0.361496	0.325231	1205	tags=56%, list=13%, signal=49%	30948/57785/14168/238871/109676/68667/16518/98660/11554
GO:0033628	GO:0033628	regulation of cell adhesion mediated by integrin	30	-0.52932	-1.76406	0.00320109	0.0773185	0.0695621	1397	tags=33%, list=15%, signal=29%	13482/16416/67694/107321/70839/105855/57816/170758/12501/20304
GO:0019934	GO:0019934	cGMP-mediated signaling	15	-0.529442	-1.49975	0.0602837	0.371535	0.334263	562	tags=33%, list=6%, signal=31%	23984/51799/207728/54195/13618
GO:1900153	GO:1900153	positive regulation of nuclear-transcribed mRNA catabolic process, deadenylation-dependent decay	12	-0.530108	-1.39173	0.117216	0.485653	0.436933	2927	tags=75%, list=30%, signal=52%	12192/234594/217351/22695/72162/239528/213988/12193/208922
GO:0050857	GO:0050857	positive regulation of antigen receptor-mediated signaling pathway	23	-0.530359	-1.67135	0.0177977	0.186556	0.167841	947	tags=35%, list=10%, signal=31%	19697/227059/19294/12520/74039/16151/225825/12775
GO:0048512	GO:0048512	circadian behavior	31	-0.53091	-1.78595	0.00407519	0.0867532	0.0780503	883	tags=32%, list=9%, signal=29%	229599/224671/16508/11906/16531/353187/19215/18628/217166/11554
GO:0070233	GO:0070233	negative regulation of T cell apoptotic process	21	-0.532953	-1.65653	0.0197971	0.193503	0.174091	1758	tags=43%, list=18%, signal=35%	15251/16453/22163/20723/18950/14605/21940/16197/20304
GO:0070142	GO:0070142	synaptic vesicle budding	11	-0.536904	-1.3767	0.121547	0.492116	0.442747	2141	tags=55%, list=22%, signal=42%	64933/233489/20616/108012/103967/13429
GO:0072677	GO:0072677	eosinophil migration	14	-0.538589	-1.48085	0.0618182	0.375998	0.338279	666	tags=21%, list=7%, signal=20%	11501/20305/20304
GO:0010518	GO:0010518	positive regulation of phospholipase activity	23	-0.538881	-1.6982	0.0135157	0.161209	0.145037	475	tags=26%, list=5%, signal=25%	18786/12323/16007/16428/18762/20304
GO:1901096	GO:1901096	regulation of autophagosome maturation	14	-0.539018	-1.48203	0.0618182	0.375998	0.338279	987	tags=57%, list=10%, signal=51%	17281/12752/67846/15944/74374/11555/16145/100502698
GO:1902547	GO:1902547	regulation of cellular response to vascular endothelial growth factor stimulus	13	-0.539468	-1.44613	0.0766423	0.410889	0.369669	1625	tags=54%, list=17%, signal=45%	24064/19245/22339/69601/74769/260299/13179
GO:0090141	GO:0090141	positive regulation of mitochondrial fission	16	-0.539558	-1.55622	0.0392322	0.298189	0.268275	2819	tags=56%, list=29%, signal=40%	68350/68166/68943/72108/239555/19765/74006/215999/13179
GO:1902473	GO:1902473	regulation of protein localization to synapse	19	-0.540164	-1.62487	0.0319487	0.260004	0.23392	652	tags=42%, list=7%, signal=39%	108155/232370/665113/50791/245666/17762/18762/56508
GO:0002418	GO:0002418	immune response to tumor cell	16	-0.542025	-1.56334	0.0365992	0.28552	0.256877	853	tags=44%, list=9%, signal=40%	171285/52118/19294/26365/225825/54698/72310
GO:0061484	GO:0061484	hematopoietic stem cell homeostasis	16	-0.542827	-1.56565	0.0365992	0.28552	0.256877	931	tags=38%, list=10%, signal=34%	27060/320405/67155/14766/56417/20849
GO:0022602	GO:0022602	ovulation cycle process	22	-0.543132	-1.70451	0.015203	0.170609	0.153494	1433	tags=41%, list=15%, signal=35%	170731/12394/244891/268903/109689/101476/14366/30953/11504
GO:0046717	GO:0046717	acid secretion	13	-0.543434	-1.45677	0.0711679	0.400838	0.360626	1876	tags=46%, list=20%, signal=37%	56018/12286/64051/18479/319924/12298
GO:0008090	GO:0008090	retrograde axonal transport	16	-0.543812	-1.56849	0.035546	0.282122	0.25382	2509	tags=69%, list=26%, signal=51%	56444/17754/16561/67269/103583/17257/81907/16572/20615/13518/12217
GO:0060292	GO:0060292	long-term synaptic depression	20	-0.544006	-1.65626	0.0193785	0.192407	0.173105	2066	tags=65%, list=21%, signal=51%	14265/29819/11820/20910/23945/20807/66082/18693/12404/245666/243725/260297/17762
GO:2001185	GO:2001185	regulation of CD8-positive, alpha-beta T cell activation	15	-0.54533	-1.54476	0.0573284	0.364119	0.327591	1279	tags=40%, list=13%, signal=35%	12394/16362/105855/74048/18106/54698
GO:0045837	GO:0045837	negative regulation of membrane potential	12	-0.545485	-1.4321	0.0879121	0.431778	0.388462	776	tags=50%, list=8%, signal=46%	16181/18754/74011/68867/17762/19242
GO:1903909	GO:1903909	regulation of receptor clustering	15	-0.546591	-1.54833	0.0573284	0.364119	0.327591	1479	tags=53%, list=15%, signal=45%	231637/230235/70546/67943/12520/19242/13385/26570
GO:0060213	GO:0060213	positive regulation of nuclear-transcribed mRNA poly(A) tail shortening	12	-0.547211	-1.43663	0.0842491	0.425947	0.383217	2861	tags=67%, list=30%, signal=47%	234594/217351/22695/233833/12227/239528/213988/208922
GO:0046519	GO:0046519	sphingoid metabolic process	11	-0.54761	-1.40415	0.108656	0.470045	0.422891	1475	tags=36%, list=15%, signal=31%	56632/433323/66190/19012
GO:0050862	GO:0050862	positive regulation of T cell receptor signaling pathway	16	-0.548327	-1.58151	0.0334397	0.268372	0.241449	947	tags=38%, list=10%, signal=34%	19697/19294/12520/16151/225825/12775
GO:0099558	GO:0099558	maintenance of synapse structure	21	-0.548591	-1.70513	0.0107754	0.142088	0.127834	2483	tags=52%, list=26%, signal=39%	23829/11845/116838/243743/94190/19339/16416/103172/12404/20661/56410
GO:1903019	GO:1903019	negative regulation of glycoprotein metabolic process	11	-0.549026	-1.40778	0.106814	0.468462	0.421467	3533	tags=82%, list=37%, signal=52%	15200/16432/64294/56321/16453/239528/16431/13010/170789
GO:1900746	GO:1900746	regulation of vascular endothelial growth factor signaling pathway	12	-0.551494	-1.44787	0.0824176	0.420768	0.378557	1625	tags=58%, list=17%, signal=49%	24064/19245/22339/69601/74769/260299/13179
GO:0071880	GO:0071880	adenylate cyclase-activating adrenergic receptor signaling pathway	12	-0.552318	-1.45004	0.0824176	0.420768	0.378557	662	tags=33%, list=7%, signal=31%	105171/11555/11515/11554
GO:0071622	GO:0071622	regulation of granulocyte chemotaxis	31	-0.552916	-1.85998	0.00202758	0.0590261	0.0531047	770	tags=26%, list=8%, signal=24%	74006/105855/12978/215999/319430/20343/12775/20304
GO:0071280	GO:0071280	cellular response to copper ion	10	-0.552928	-1.40238	0.12	0.489296	0.440211	3255	tags=60%, list=34%, signal=40%	18023/19122/20617/15499/11977/17751
GO:0035872	GO:0035872	nucleotide-binding domain, leucine rich repeat containing receptor signaling pathway	18	-0.553896	-1.6367	0.0244012	0.218913	0.196952	987	tags=44%, list=10%, signal=40%	65221/432940/15944/19697/210808/193740/16145/15511
GO:0046851	GO:0046851	negative regulation of bone remodeling	11	-0.555841	-1.42526	0.0994475	0.450924	0.405688	1316	tags=45%, list=14%, signal=39%	107173/22339/16331/231633/26365
GO:0010801	GO:0010801	negative regulation of peptidyl-threonine phosphorylation	13	-0.556004	-1.49046	0.0547445	0.360324	0.324177	2778	tags=69%, list=29%, signal=49%	17872/114715/114716/108155/24064/74747/17131/19062/260299
GO:0031115	GO:0031115	negative regulation of microtubule polymerization	11	-0.556571	-1.42713	0.0976059	0.449206	0.404142	1825	tags=64%, list=19%, signal=52%	20617/72205/54126/76686/13548/20393/22153
GO:0045956	GO:0045956	positive regulation of calcium ion-dependent exocytosis	10	-0.556949	-1.41258	0.112727	0.478889	0.430847	2252	tags=80%, list=23%, signal=61%	12568/20983/20979/20910/27062/56807/54525/60510
GO:0017156	GO:0017156	calcium-ion regulated exocytosis	48	-0.557084	-2.03149	4.78984e-05	0.00572956	0.00515478	2252	tags=54%, list=23%, signal=42%	12568/20983/20979/116838/20910/27062/12286/56807/20965/19339/20615/54525/208898/80976/22318/320405/70497/242662/241770/20980/60510/20614/56216/56508/116837/19894
GO:0010758	GO:0010758	regulation of macrophage chemotaxis	21	-0.557091	-1.73155	0.00905664	0.127097	0.114346	518	tags=19%, list=5%, signal=18%	12978/102103/12775/20304
GO:0002323	GO:0002323	natural killer cell activation involved in immune response	11	-0.557148	-1.42861	0.0976059	0.449206	0.404142	2755	tags=55%, list=29%, signal=39%	11891/70450/11765/21946/18106/72310
GO:0099622	GO:0099622	cardiac muscle cell membrane repolarization	10	-0.557243	-1.41333	0.112727	0.478889	0.430847	2072	tags=60%, list=22%, signal=47%	109676/12293/20266/12289/16518/70729
GO:0021681	GO:0021681	cerebellar granular layer development	14	-0.557269	-1.53221	0.0472727	0.334034	0.300524	1589	tags=71%, list=17%, signal=60%	19130/18032/140810/20720/11941/94190/12404/57754/76484/72393
GO:0098693	GO:0098693	regulation of synaptic vesicle cycle	14	-0.559578	-1.53856	0.0319829	0.260004	0.23392	1287	tags=29%, list=13%, signal=25%	102866/18805/12217/56508
GO:0022410	GO:0022410	circadian sleep/wake cycle process	10	-0.561182	-1.42332	0.107273	0.46905	0.421995	788	tags=40%, list=8%, signal=37%	224671/19215/18628/11554
GO:0050802	GO:0050802	circadian sleep/wake cycle, sleep	10	-0.561182	-1.42332	0.107273	0.46905	0.421995	788	tags=40%, list=8%, signal=37%	224671/19215/18628/11554
GO:0090128	GO:0090128	regulation of synapse maturation	15	-0.562027	-1.59206	0.0445174	0.324138	0.291621	1613	tags=33%, list=17%, signal=28%	19878/12323/53321/18011/69601
GO:0006002	GO:0006002	fructose 6-phosphate metabolic process	10	-0.562235	-1.42599	0.105455	0.465959	0.419215	2445	tags=60%, list=25%, signal=45%	18023/56421/15275/212032/18642/15277
GO:0010759	GO:0010759	positive regulation of macrophage chemotaxis	16	-0.562951	-1.62369	0.0242358	0.218526	0.196604	518	tags=19%, list=5%, signal=18%	12978/12775/20304
GO:0006684	GO:0006684	sphingomyelin metabolic process	14	-0.563161	-1.54841	0.0303428	0.252057	0.226771	1943	tags=64%, list=20%, signal=51%	20598/100503915/58994/77626/18753/66612/67630/208449/20597
GO:0009187	GO:0009187	cyclic nucleotide metabolic process	14	-0.564002	-1.55072	0.0303428	0.252057	0.226771	375	tags=36%, list=4%, signal=34%	207728/54195/432530/11515/12298
GO:0032925	GO:0032925	regulation of activin receptor signaling pathway	14	-0.564673	-1.55257	0.0303428	0.252057	0.226771	1674	tags=43%, list=17%, signal=35%	11481/14180/17131/11477/22772/50791
GO:0060221	GO:0060221	retinal rod cell differentiation	10	-0.565731	-1.43485	0.1	0.452613	0.407207	1064	tags=50%, list=11%, signal=45%	236266/52906/77945/12628/19242
GO:0070528	GO:0070528	protein kinase C signaling	21	-0.566245	-1.76001	0.00661106	0.105107	0.0945633	1539	tags=48%, list=16%, signal=40%	50918/233878/56632/227333/22339/14766/53357/83397/110197/18762
GO:0070230	GO:0070230	positive regulation of lymphocyte apoptotic process	15	-0.566475	-1.60466	0.0407854	0.306746	0.275973	1065	tags=27%, list=11%, signal=24%	50996/11501/170770/20304
GO:0009583	GO:0009583	detection of light stimulus	14	-0.568066	-1.5619	0.0276093	0.235499	0.211874	1086	tags=43%, list=11%, signal=38%	109689/19662/110911/50769/18545/12298
GO:0060547	GO:0060547	negative regulation of necrotic cell death	16	-0.568829	-1.64065	0.0221398	0.205982	0.185318	835	tags=25%, list=9%, signal=23%	19766/11796/11797/17751
GO:0042745	GO:0042745	circadian sleep/wake cycle	13	-0.569727	-1.52725	0.0456204	0.326492	0.293738	788	tags=38%, list=8%, signal=35%	224671/19215/18628/217166/11554
GO:0045779	GO:0045779	negative regulation of bone resorption	10	-0.570033	-1.44577	0.0981818	0.450766	0.405546	1316	tags=50%, list=14%, signal=43%	107173/22339/16331/231633/26365
GO:0060546	GO:0060546	negative regulation of necroptotic process	11	-0.57197	-1.46661	0.0791897	0.415291	0.37363	835	tags=27%, list=9%, signal=25%	19766/11796/11797
GO:0045475	GO:0045475	locomotor rhythm	14	-0.572225	-1.57333	0.0262492	0.228555	0.205627	1661	tags=43%, list=17%, signal=36%	53376/26414/229599/16508/11906/16531
GO:0042744	GO:0042744	hydrogen peroxide catabolic process	14	-0.572771	-1.57484	0.0257052	0.226965	0.204196	38	tags=21%, list=0%, signal=21%	101488143/17751/15122
GO:0006670	GO:0006670	sphingosine metabolic process	10	-0.572773	-1.45272	0.0945455	0.441857	0.397531	1475	tags=40%, list=15%, signal=34%	56632/433323/66190/19012
GO:0003198	GO:0003198	epithelial to mesenchymal transition involved in endocardial cushion formation	10	-0.573156	-1.45369	0.0927273	0.438576	0.394579	2565	tags=50%, list=27%, signal=37%	67888/21813/11477/21812/13805
GO:0060080	GO:0060080	inhibitory postsynaptic potential	10	-0.573801	-1.45532	0.0909091	0.434978	0.391342	922	tags=30%, list=10%, signal=27%	235086/116837/11554
GO:0098974	GO:0098974	postsynaptic actin cytoskeleton organization	18	-0.574405	-1.6973	0.0145342	0.167088	0.150326	1825	tags=50%, list=19%, signal=41%	242687/54126/19878/73178/170758/243725/217692/20404/70729
GO:0099188	GO:0099188	postsynaptic cytoskeleton organization	18	-0.574405	-1.6973	0.0145342	0.167088	0.150326	1825	tags=50%, list=19%, signal=41%	242687/54126/19878/73178/170758/243725/217692/20404/70729
GO:0070262	GO:0070262	peptidyl-serine dephosphorylation	11	-0.576579	-1.47843	0.0644567	0.382228	0.343883	3229	tags=73%, list=34%, signal=48%	17872/108954/19055/228852/19252/320717/68606/17973
GO:0072537	GO:0072537	fibroblast activation	14	-0.57759	-1.58809	0.0229851	0.210744	0.189602	1856	tags=71%, list=19%, signal=58%	17863/16172/56637/18591/13350/20111/66214/75745/114886/217166
GO:1902624	GO:1902624	positive regulation of neutrophil migration	22	-0.577679	-1.81293	0.00542872	0.0960348	0.0864007	770	tags=27%, list=8%, signal=25%	74006/105855/11501/215999/20343/12775
GO:1904754	GO:1904754	positive regulation of vascular associated smooth muscle cell migration	13	-0.57812	-1.54975	0.0578994	0.365556	0.328884	2464	tags=54%, list=26%, signal=40%	18591/11977/231637/14180/238130/18479/11504
GO:0033631	GO:0033631	cell-cell adhesion mediated by integrin	15	-0.578164	-1.63777	0.031189	0.255618	0.229974	11	tags=20%, list=0%, signal=20%	13482/12501/20304
GO:0031629	GO:0031629	synaptic vesicle fusion to presynaptic active zone membrane	21	-0.578488	-1.79806	0.00450607	0.0911218	0.0819806	2181	tags=67%, list=23%, signal=52%	20979/116838/20910/20619/12889/19339/20615/12890/54525/20980/60510/20614/56216/116837
GO:0099500	GO:0099500	vesicle fusion to plasma membrane	21	-0.578488	-1.79806	0.00450607	0.0911218	0.0819806	2181	tags=67%, list=23%, signal=52%	20979/116838/20910/20619/12889/19339/20615/12890/54525/20980/60510/20614/56216/116837
GO:0030431	GO:0030431	sleep	14	-0.579453	-1.59321	0.0227131	0.208994	0.188028	788	tags=43%, list=8%, signal=39%	224671/14811/20614/19215/18628/11554
GO:0010968	GO:0010968	regulation of microtubule nucleation	11	-0.580007	-1.48722	0.0626151	0.377825	0.339923	2976	tags=73%, list=31%, signal=50%	57785/72205/13191/17257/54126/193740/18479/15511
GO:0099149	GO:0099149	regulation of postsynaptic neurotransmitter receptor internalization	18	-0.580699	-1.7159	0.0132021	0.160211	0.144139	1574	tags=44%, list=16%, signal=37%	94190/16416/18717/18693/232227/108086/18222/23969
GO:0098698	GO:0098698	postsynaptic specialization assembly	23	-0.581225	-1.83164	0.0038758	0.0842944	0.0758381	734	tags=30%, list=8%, signal=28%	12404/18213/18164/217692/18190/236915/18191
GO:0045746	GO:0045746	negative regulation of Notch signaling pathway	21	-0.582431	-1.81031	0.00424294	0.0880849	0.0792484	1127	tags=48%, list=12%, signal=42%	16848/109689/215705/75745/18011/12053/320705/18222/69068/353156
GO:1990573	GO:1990573	potassium ion import across plasma membrane	17	-0.582634	-1.69872	0.0174849	0.18518	0.166603	1146	tags=47%, list=12%, signal=42%	16519/16522/107723/16518/83704/11931/11932/98660
GO:0099068	GO:0099068	postsynapse assembly	32	-0.583251	-1.96986	0.000355733	0.0205425	0.0184817	734	tags=31%, list=8%, signal=29%	12404/50791/18213/18164/217692/18222/241638/18190/236915/18191
GO:0070102	GO:0070102	interleukin-6-mediated signaling pathway	15	-0.583404	-1.65261	0.0258629	0.22728	0.20448	898	tags=53%, list=9%, signal=48%	14158/19255/12606/16194/19766/230594/16195/67445
GO:0002675	GO:0002675	positive regulation of acute inflammatory response	17	-0.58372	-1.70189	0.0174849	0.18518	0.166603	1219	tags=53%, list=13%, signal=46%	14129/21934/11690/30955/12229/11501/12774/12775/20304
GO:0007616	GO:0007616	long-term memory	27	-0.583791	-1.90789	0.00129921	0.0447071	0.0402222	1498	tags=48%, list=16%, signal=41%	66259/20807/72961/68667/16835/224938/224671/208922/20393/12307/432530/20614/18762
GO:1903421	GO:1903421	regulation of synaptic vesicle recycling	30	-0.585405	-1.95098	0.000262178	0.0176342	0.0158652	2011	tags=53%, list=21%, signal=42%	233489/20616/56807/20430/94190/18786/54525/72961/18717/22318/224671/74006/103967/56216/26875/13429
GO:0072683	GO:0072683	T cell extravasation	12	-0.586037	-1.53856	0.0512821	0.349416	0.314363	234	tags=17%, list=2%, signal=16%	16456/20304
GO:0048245	GO:0048245	eosinophil chemotaxis	11	-0.586832	-1.50472	0.0626151	0.377825	0.339923	94	tags=36%, list=1%, signal=36%	20303/20306/20305/20304
GO:1901623	GO:1901623	regulation of lymphocyte chemotaxis	14	-0.586998	-1.61395	0.018361	0.187491	0.168682	303	tags=21%, list=3%, signal=21%	18600/12775/20304
GO:0070423	GO:0070423	nucleotide-binding oligomerization domain containing signaling pathway	17	-0.587384	-1.71257	0.0156444	0.172742	0.155413	987	tags=47%, list=10%, signal=42%	65221/432940/15944/19697/210808/193740/16145/15511
GO:0098696	GO:0098696	regulation of neurotransmitter receptor localization to postsynaptic specialization membrane	13	-0.587806	-1.57571	0.0447198	0.324202	0.291679	652	tags=38%, list=7%, signal=36%	665113/50791/245666/18762/56508
GO:1903423	GO:1903423	positive regulation of synaptic vesicle recycling	14	-0.587854	-1.61631	0.018361	0.187491	0.168682	2293	tags=57%, list=24%, signal=44%	20405/233489/20616/18786/74006/103967/26875/13429
GO:0052652	GO:0052652	cyclic purine nucleotide metabolic process	13	-0.58829	-1.57701	0.0447198	0.324202	0.291679	375	tags=38%, list=4%, signal=37%	207728/54195/432530/11515/12298
GO:0035733	GO:0035733	hepatic stellate cell activation	11	-0.588636	-1.50935	0.0589319	0.367337	0.330486	2464	tags=55%, list=26%, signal=41%	18591/13350/20111/75745/114886/217166
GO:0140131	GO:0140131	positive regulation of lymphocyte chemotaxis	12	-0.589161	-1.54676	0.0512821	0.349416	0.314363	31	tags=25%, list=0%, signal=25%	20306/12775/20304
GO:0047484	GO:0047484	regulation of response to osmotic stress	11	-0.590102	-1.51311	0.0552486	0.360878	0.324675	2437	tags=64%, list=25%, signal=48%	12752/18750/56384/216001/66972/14479/18669
GO:0090129	GO:0090129	positive regulation of synapse maturation	10	-0.590108	-1.49668	0.0618182	0.375998	0.338279	1526	tags=40%, list=16%, signal=34%	18013/12323/18011/69601
GO:0010996	GO:0010996	response to auditory stimulus	14	-0.592717	-1.62968	0.0170009	0.183683	0.165256	624	tags=36%, list=6%, signal=33%	20512/18190/19242/98660/50769
GO:0090022	GO:0090022	regulation of neutrophil chemotaxis	18	-0.594409	-1.75641	0.00975234	0.132321	0.119047	770	tags=39%, list=8%, signal=36%	13482/74006/105855/215999/319430/20343/12775
GO:0043114	GO:0043114	regulation of vascular permeability	23	-0.595837	-1.87769	0.00235689	0.0629842	0.0566658	455	tags=57%, list=5%, signal=54%	54611/218952/19271/20303/19245/22339/83397/26365/207728/21872/54409/20404/12741
GO:0033033	GO:0033033	negative regulation of myeloid cell apoptotic process	15	-0.596269	-1.68906	0.0200273	0.194401	0.174899	1503	tags=27%, list=16%, signal=23%	23845/320404/12774/20304
GO:0046339	GO:0046339	diacylglycerol metabolic process	15	-0.597129	-1.69149	0.0200273	0.194401	0.174899	1955	tags=73%, list=20%, signal=59%	102247/380921/231871/13350/192654/16890/227333/13139/66853/110197/19012
GO:0002523	GO:0002523	leukocyte migration involved in inflammatory response	14	-0.598273	-1.64495	0.0137368	0.162768	0.14644	666	tags=29%, list=7%, signal=27%	11501/19242/16409/12458
GO:0002643	GO:0002643	regulation of tolerance induction	11	-0.598626	-1.53496	0.0497238	0.342504	0.308145	2514	tags=64%, list=26%, signal=47%	208650/21813/16396/171285/12394/12775/12501
GO:0031054	GO:0031054	pre-miRNA processing	13	-0.600093	-1.60865	0.0359405	0.283908	0.255426	2307	tags=69%, list=24%, signal=53%	14000/23992/239528/76850/230594/236511/75284/56417/214150
GO:1990504	GO:1990504	dense core granule exocytosis	12	-0.605626	-1.58999	0.0316665	0.258687	0.232736	2212	tags=75%, list=23%, signal=58%	70450/20983/20910/27062/19339/208898/320405/20614/116837
GO:0044321	GO:0044321	response to leptin	11	-0.609088	-1.56179	0.0512228	0.349416	0.314363	1035	tags=27%, list=11%, signal=24%	22234/217166/17751
GO:0048680	GO:0048680	positive regulation of axon regeneration	10	-0.609716	-1.54641	0.0543979	0.359599	0.323524	1952	tags=50%, list=20%, signal=40%	109880/223255/18213/16001/19242
GO:0031630	GO:0031630	regulation of synaptic vesicle fusion to presynaptic active zone membrane	11	-0.609966	-1.56404	0.0501153	0.343961	0.309455	2181	tags=82%, list=23%, signal=63%	20979/116838/12889/19339/12890/54525/20980/60510/116837
GO:1901632	GO:1901632	regulation of synaptic vesicle membrane organization	11	-0.609966	-1.56404	0.0501153	0.343961	0.309455	2181	tags=82%, list=23%, signal=63%	20979/116838/12889/19339/12890/54525/20980/60510/116837
GO:0061760	GO:0061760	antifungal innate immune response	13	-0.610405	-1.63629	0.0304536	0.252057	0.226771	1306	tags=46%, list=14%, signal=40%	234779/13051/14479/66294/67525/69810
GO:0006925	GO:0006925	inflammatory cell apoptotic process	20	-0.610653	-1.85917	0.00268721	0.0692336	0.0622882	357	tags=30%, list=4%, signal=29%	12774/17260/74769/26570/16409/20304
GO:0006883	GO:0006883	intracellular sodium ion homeostasis	13	-0.610812	-1.63738	0.0304536	0.252057	0.226771	731	tags=46%, list=8%, signal=43%	57816/20512/11931/11932/20393/98660
GO:0042532	GO:0042532	negative regulation of tyrosine phosphorylation of STAT protein	10	-0.614578	-1.55875	0.0494775	0.342504	0.308145	2345	tags=60%, list=24%, signal=45%	19255/12702/16362/547253/16923/74019
GO:0097107	GO:0097107	postsynaptic density assembly	17	-0.6152	-1.79367	0.00726052	0.10954	0.0985512	734	tags=35%, list=8%, signal=33%	12404/18213/18164/217692/18190/18191
GO:0090036	GO:0090036	regulation of protein kinase C signaling	13	-0.618541	-1.6581	0.026072	0.227406	0.204593	1539	tags=62%, list=16%, signal=52%	50918/233878/56632/227333/22339/53357/83397/110197
GO:0055075	GO:0055075	potassium ion homeostasis	13	-0.618613	-1.6583	0.026072	0.227406	0.204593	1018	tags=46%, list=11%, signal=41%	107723/83704/11931/11932/16531/98660
GO:0031650	GO:0031650	regulation of heat generation	11	-0.624135	-1.60037	0.0357177	0.283038	0.254644	662	tags=36%, list=7%, signal=34%	105171/12774/13618/20304
GO:0036336	GO:0036336	dendritic cell migration	16	-0.624731	-1.80188	0.00599956	0.100473	0.0903934	1931	tags=50%, list=20%, signal=40%	13860/74748/98365/28240/68667/321019/12775/12458
GO:0045932	GO:0045932	negative regulation of muscle contraction	15	-0.627483	-1.77748	0.0089086	0.126076	0.113428	765	tags=33%, list=8%, signal=31%	238130/11555/16531/98660/11554
GO:0099011	GO:0099011	neuronal dense core vesicle exocytosis	10	-0.629646	-1.59696	0.0390901	0.297558	0.267708	2212	tags=70%, list=23%, signal=54%	20983/20910/27062/19339/208898/20614/116837
GO:2000489	GO:2000489	regulation of hepatic stellate cell activation	10	-0.630433	-1.59896	0.0390901	0.297558	0.267708	2464	tags=60%, list=26%, signal=45%	18591/13350/20111/75745/114886/217166
GO:0071676	GO:0071676	negative regulation of mononuclear cell migration	12	-0.630768	-1.656	0.0190435	0.19211	0.172838	2106	tags=67%, list=22%, signal=52%	17470/19252/74748/73178/57781/380916/18600/11815
GO:0002716	GO:0002716	negative regulation of natural killer cell mediated immunity	10	-0.631746	-1.60229	0.0363566	0.285399	0.256768	1788	tags=60%, list=19%, signal=49%	171285/20723/21355/93694/16002/26365
GO:0045953	GO:0045953	negative regulation of natural killer cell mediated cytotoxicity	10	-0.631746	-1.60229	0.0363566	0.285399	0.256768	1788	tags=60%, list=19%, signal=49%	171285/20723/21355/93694/16002/26365
GO:0071624	GO:0071624	positive regulation of granulocyte chemotaxis	14	-0.633662	-1.74226	0.00535327	0.0957111	0.0861095	770	tags=36%, list=8%, signal=33%	74006/105855/215999/20343/12775
GO:0090023	GO:0090023	positive regulation of neutrophil chemotaxis	14	-0.633662	-1.74226	0.00535327	0.0957111	0.0861095	770	tags=36%, list=8%, signal=33%	74006/105855/215999/20343/12775
GO:1900006	GO:1900006	positive regulation of dendrite development	14	-0.634569	-1.74475	0.00508392	0.0935591	0.0841734	2107	tags=64%, list=22%, signal=50%	74143/15572/71900/20430/56430/69601/19242/382056/23969
GO:0070431	GO:0070431	nucleotide-binding oligomerization domain containing 2 signaling pathway	15	-0.634583	-1.79759	0.00706093	0.108153	0.0973031	987	tags=53%, list=10%, signal=48%	65221/432940/15944/19697/210808/193740/16145/15511
GO:0035278	GO:0035278	miRNA-mediated gene silencing by inhibition of translation	12	-0.634985	-1.66707	0.0179475	0.186556	0.167841	2822	tags=67%, list=29%, signal=47%	217351/22695/233833/239528/213988/76850/236511/214150
GO:0090153	GO:0090153	regulation of sphingolipid biosynthetic process	12	-0.63534	-1.668	0.0179475	0.186556	0.167841	1823	tags=50%, list=19%, signal=41%	18753/66612/56632/67630/53357/16007
GO:1905038	GO:1905038	regulation of membrane lipid metabolic process	12	-0.63534	-1.668	0.0179475	0.186556	0.167841	1823	tags=50%, list=19%, signal=41%	18753/66612/56632/67630/53357/16007
GO:0019184	GO:0019184	nonribosomal peptide biosynthetic process	11	-0.635488	-1.62948	0.030734	0.25396	0.228483	575	tags=27%, list=6%, signal=26%	20511/23887/26570
GO:0045591	GO:0045591	positive regulation of regulatory T cell differentiation	12	-0.636242	-1.67037	0.0176735	0.186146	0.167472	2234	tags=50%, list=23%, signal=38%	207952/228361/81601/12053/63953/74048
GO:0030852	GO:0030852	regulation of granulocyte differentiation	12	-0.640286	-1.68099	0.0157555	0.173586	0.156173	1366	tags=50%, list=14%, signal=43%	22778/12394/72147/57816/16331/26365
GO:0090026	GO:0090026	positive regulation of monocyte chemotaxis	11	-0.642223	-1.64675	0.0279652	0.236633	0.212894	304	tags=27%, list=3%, signal=26%	13051/20315/20304
GO:0006750	GO:0006750	glutathione biosynthetic process	10	-0.644677	-1.63508	0.0303428	0.252057	0.226771	575	tags=30%, list=6%, signal=28%	20511/23887/26570
GO:0001660	GO:0001660	fever generation	10	-0.653929	-1.65855	0.0248892	0.222894	0.200533	357	tags=30%, list=4%, signal=29%	12774/13618/20304
GO:0010818	GO:0010818	T cell chemotaxis	13	-0.654941	-1.75568	0.0118853	0.151474	0.136278	746	tags=31%, list=8%, signal=28%	321019/20315/12775/20304
GO:0016082	GO:0016082	synaptic vesicle priming	22	-0.655911	-2.05844	0.000279611	0.0177818	0.015998	2067	tags=59%, list=22%, signal=46%	116838/20910/78808/20619/27062/19339/208898/64051/320405/20614/56216/116837/19894
GO:0070234	GO:0070234	positive regulation of T cell apoptotic process	11	-0.65798	-1.68715	0.0210773	0.200346	0.180248	1065	tags=36%, list=11%, signal=32%	50996/11501/170770/20304
GO:0015812	GO:0015812	gamma-aminobutyric acid transport	11	-0.65886	-1.68941	0.0210773	0.200346	0.180248	1924	tags=55%, list=20%, signal=44%	14412/12286/64051/18479/319924/12298
GO:0071888	GO:0071888	macrophage apoptotic process	10	-0.662261	-1.67968	0.020265	0.195791	0.17615	357	tags=30%, list=4%, signal=29%	12774/17260/20304
GO:0031649	GO:0031649	heat generation	15	-0.663612	-1.87982	0.00298942	0.0743506	0.0668919	662	tags=40%, list=7%, signal=37%	105171/11555/12774/13618/11554/20304
GO:0002396	GO:0002396	MHC protein complex assembly	11	-0.665041	-1.70526	0.0180466	0.186556	0.167841	180	tags=18%, list=2%, signal=18%	15001/15002
GO:0002501	GO:0002501	peptide antigen assembly with MHC protein complex	11	-0.665041	-1.70526	0.0180466	0.186556	0.167841	180	tags=18%, list=2%, signal=18%	15001/15002
GO:0045671	GO:0045671	negative regulation of osteoclast differentiation	18	-0.665853	-1.96752	0.000923346	0.0347142	0.0312318	1253	tags=50%, list=13%, signal=44%	18708/16658/68027/93694/234515/16331/50754/26365/18725
GO:1901018	GO:1901018	positive regulation of potassium ion transmembrane transporter activity	11	-0.665887	-1.70743	0.0174956	0.18518	0.166603	2163	tags=55%, list=23%, signal=42%	432442/16485/109676/11931/11932/16502
GO:2001212	GO:2001212	regulation of vasculogenesis	10	-0.666966	-1.69162	0.018361	0.187491	0.168682	386	tags=60%, list=4%, signal=58%	67888/74030/76089/26365/54409/12490
GO:2000303	GO:2000303	regulation of ceramide biosynthetic process	10	-0.668029	-1.69431	0.0175449	0.18518	0.166603	1823	tags=60%, list=19%, signal=49%	18753/66612/56632/67630/53357/16007
GO:0043922	GO:0043922	negative regulation by host of viral transcription	10	-0.674133	-1.7098	0.0159129	0.174421	0.156924	1128	tags=30%, list=12%, signal=27%	67778/19062/20304
GO:0033632	GO:0033632	regulation of cell-cell adhesion mediated by integrin	10	-0.679177	-1.72259	0.0131955	0.160211	0.144139	11	tags=30%, list=0%, signal=30%	13482/12501/20304
GO:0072578	GO:0072578	neurotransmitter-gated ion channel clustering	10	-0.680783	-1.72666	0.0125188	0.154942	0.139398	2090	tags=60%, list=22%, signal=47%	268566/231637/230235/70546/13385/26570
GO:0000272	GO:0000272	polysaccharide catabolic process	13	-0.681008	-1.82556	0.00591346	0.0996953	0.0896941	2103	tags=54%, list=22%, signal=42%	77559/110078/244416/12421/68961/18642/11554
GO:0005980	GO:0005980	glycogen catabolic process	13	-0.681008	-1.82556	0.00591346	0.0996953	0.0896941	2103	tags=54%, list=22%, signal=42%	77559/110078/244416/12421/68961/18642/11554
GO:0009251	GO:0009251	glucan catabolic process	13	-0.681008	-1.82556	0.00591346	0.0996953	0.0896941	2103	tags=54%, list=22%, signal=42%	77559/110078/244416/12421/68961/18642/11554
GO:0044247	GO:0044247	cellular polysaccharide catabolic process	13	-0.681008	-1.82556	0.00591346	0.0996953	0.0896941	2103	tags=54%, list=22%, signal=42%	77559/110078/244416/12421/68961/18642/11554
GO:0048791	GO:0048791	calcium ion-regulated exocytosis of neurotransmitter	20	-0.687917	-2.0944	0.000117625	0.0105526	0.00949401	2212	tags=75%, list=23%, signal=58%	20983/20979/116838/20910/27062/12286/19339/54525/208898/242662/241770/20980/20614/56216/116837
GO:0007214	GO:0007214	gamma-aminobutyric acid signaling pathway	14	-0.689935	-1.89698	0.000991819	0.036639	0.0329634	74	tags=57%, list=1%, signal=57%	12286/224860/14406/227120/242425/14394/12298/14399
GO:0001911	GO:0001911	negative regulation of leukocyte mediated cytotoxicity	14	-0.695454	-1.91215	0.000783745	0.0310042	0.0278939	1268	tags=64%, list=13%, signal=56%	171285/13051/20723/21355/93694/105855/16002/26365/16197
GO:0031342	GO:0031342	negative regulation of cell killing	14	-0.695454	-1.91215	0.000783745	0.0310042	0.0278939	1268	tags=64%, list=13%, signal=56%	171285/13051/20723/21355/93694/105855/16002/26365/16197
GO:0002407	GO:0002407	dendritic cell chemotaxis	11	-0.703601	-1.80413	0.00671815	0.105933	0.0953056	1805	tags=64%, list=19%, signal=52%	74748/98365/28240/68667/321019/12775/12458
GO:0002577	GO:0002577	regulation of antigen processing and presentation	12	-0.709657	-1.86311	0.00224427	0.0614336	0.0552706	1044	tags=33%, list=11%, signal=30%	21355/15001/15002/12775
GO:0043116	GO:0043116	negative regulation of vascular permeability	13	-0.713254	-1.912	0.00220246	0.0611194	0.054988	455	tags=77%, list=5%, signal=73%	54611/218952/19271/22339/83397/26365/207728/54409/20404/12741
GO:0033630	GO:0033630	positive regulation of cell adhesion mediated by integrin	15	-0.716125	-2.02857	0.000396363	0.021846	0.0196544	1362	tags=47%, list=14%, signal=40%	16416/67694/70839/105855/170758/12501/20304
GO:0098814	GO:0098814	spontaneous synaptic transmission	10	-0.74473	-1.88885	0.00155856	0.0505175	0.0454497	500	tags=70%, list=5%, signal=66%	11820/20979/116838/243725/56216/116837/19894
GO:0043383	GO:0043383	negative T cell selection	10	-0.76859	-1.94936	0.000651049	0.0297352	0.0267522	33	tags=30%, list=0%, signal=30%	50932/12775/12501
GO:0045060	GO:0045060	negative thymic T cell selection	10	-0.76859	-1.94936	0.000651049	0.0297352	0.0267522	33	tags=30%, list=0%, signal=30%	50932/12775/12501
