# Supplementary material for: PTEN restrains SHH medulloblastoma growth through cell autonomous and nonautonomous mechanisms
Source: eLife. 2026 Apr 17;14:RP108190. doi: 10.7554/eLife.108190 (PMC13090030; doi:10.7554/eLife.108190)
Supplement: Figure 9—source data 1. — Related to Figure 9A. [file elife-108190-fig9-data1.xlsx]

## Sheet: Figure 9-source data 1
Figure 9-source data 1. scRNA-seq differential gene expression analysis of GCP-like tumor cells comparing SmoM2; Ptenfl/fl to SmoM2. Related to Figure 9A.
gene	p_val	avg_log2FC	pct.1	pct.2	p_val_adj
Hbb-bs	0	-1.76553	0.019	0.596	0
BC004004	0	-2.22708	0.257	0.781	0
Olig3	0	-1.90208	0.275	0.723	0
Ttr	0	-3.59604	0.037	0.389	0
Hist1h2ab	0	-3.84833	0.038	0.336	0
Hba-a1	0	-2.04792	0.003	0.256	0
mt-Atp8	0	-1.24875	0.721	0.938	0
Gng13	0	-6.15238	0.002	0.197	0
Hbb-bt	0	-2.99548	0.004	0.186	0
Hjurp	0	-1.20128	0.764	0.937	0
mt-Nd4l	0	-1.12602	0.956	0.994	0
Rbm3	0	1.10827	0.991	0.972	0
AY036118	0	-0.885992	0.978	0.991	0
Rpl35	0	-0.590401	0.981	0.975	0
Rpl38	0	-0.641636	0.985	0.982	0
Rps21	0	-0.780089	0.989	0.991	0
Rps27	0	-0.770552	0.986	0.984	0
Rpl26	0	-0.566492	0.982	0.98	0
Rpl37	0	-0.681096	0.988	0.986	0
Rps29	0	-0.823241	0.994	0.993	0
Rps28	0	-0.805151	0.987	0.986	0
Rpl39	0	-0.666901	0.988	0.989	0
Rpl37a	0	-0.548984	0.989	0.989	0
Gm42418	0	-0.818545	0.999	0.999	0
Malat1	6.79195e-304	-0.727627	0.998	1	1.45117e-299
Eif1	1.18612e-290	0.565275	0.996	0.988	2.53427e-286
H3f3a	1.62503e-290	0.380641	0.999	0.994	3.47203e-286
Rpl34	1.07596e-282	-0.471432	0.986	0.984	2.2989e-278
Atp5k	2.34635e-268	-0.872758	0.833	0.935	5.01322e-264
Gm10260	1.24956e-261	-0.961292	0.57	0.94	2.66982e-257
Rpl41	1.981e-242	-0.462411	0.994	0.99	4.23261e-238
Tomm7	8.62327e-240	-0.667524	0.908	0.952	1.84245e-235
Snrpg	2.71484e-239	-0.465152	0.978	0.975	5.80053e-235
Ndufa3	5.76626e-236	-0.991727	0.664	0.878	1.23202e-231
Krt12	1.1775e-235	-4.20771	0.01	0.174	2.51585e-231
Mat2a	4.27952e-232	0.885844	0.939	0.901	9.14361e-228
mt-Nd3	8.45577e-230	-1.05578	0.789	0.938	1.80666e-225
Pcp2	1.97611e-228	-5.15316	0.002	0.136	4.22215e-224
mt-Co2	1.21949e-227	0.294718	0.999	0.999	2.60555e-223
Dpm3	1.17854e-212	-0.998919	0.584	0.854	2.51807e-208
Draxin	1.82158e-212	-0.82782	0.779	0.958	3.89198e-208
Cox6c	7.31429e-208	-0.43123	0.982	0.981	1.56277e-203
Tpt1	2.56249e-205	0.31665	0.996	0.988	5.47502e-201
Zbtb20	3.30083e-205	-0.641113	0.957	0.989	7.05256e-201
Atp5e	3.51154e-205	-0.453435	0.971	0.967	7.50275e-201
Ntrk3	1.10215e-197	-1.22376	0.358	0.697	2.35486e-193
Hist2h2ac	3.92705e-195	-2.19612	0.098	0.346	8.39055e-191
AC149090.1	4.47894e-194	-1.68627	0.179	0.483	9.56971e-190
Atp5md	3.22019e-192	-0.608552	0.899	0.949	6.88025e-188
Hist1h4c	2.91976e-187	-3.01472	0.021	0.181	6.23836e-183
Rpl36a	3.7508e-186	-0.4649	0.975	0.973	8.01395e-182
Ndufb1-ps	1.30391e-182	-0.690465	0.842	0.93	2.78593e-178
Cox7c	2.45806e-180	-0.380493	0.983	0.986	5.25189e-176
Otx1	2.7318e-180	-1.83591	0.105	0.354	5.83676e-176
Slc30a10	1.21254e-174	-1.80444	0.098	0.341	2.59072e-170
Romo1	1.57648e-172	-0.671392	0.821	0.927	3.3683e-168
Aldoc	3.26325e-171	-3.07846	0.019	0.164	6.97227e-167
Car8	1.48472e-169	-5.81714	0.002	0.103	3.17225e-165
Rpl35a	2.74384e-169	-0.362072	0.985	0.98	5.86249e-165
Dpysl4	1.1056e-167	1.15122	0.759	0.567	2.36221e-163
C1ql1	3.30438e-167	-0.77843	0.782	0.946	7.06014e-163
Ckb	2.91126e-165	0.665166	0.995	0.988	6.22021e-161
Sowaha	1.56094e-163	3.73484	0.324	0.042	3.3351e-159
Mfap4	4.80216e-163	1.2105	0.719	0.462	1.02603e-158
Cplx2	4.37697e-162	0.939759	0.848	0.731	9.35183e-158
Nfia	5.43371e-158	-0.404521	0.99	0.992	1.16097e-153
Lima1	1.38138e-157	-1.28912	0.268	0.568	2.95146e-153
Snrpf	5.12324e-155	-0.402478	0.967	0.974	1.09463e-150
Rpl36	2.25704e-152	-0.373282	0.987	0.979	4.8224e-148
Chd3	9.39463e-152	2.41059	0.391	0.11	2.00726e-147
Hint1	3.67398e-151	0.36993	0.987	0.977	7.84983e-147
Mroh2a	1.63473e-149	-1.61066	0.287	0.552	3.49277e-145
Gm8797	5.03602e-148	0.611532	0.976	0.786	1.076e-143
Ramp2	8.44037e-148	-1.29223	0.207	0.484	1.80337e-143
Rps26	1.68714e-147	-0.325839	0.987	0.983	3.60475e-143
Btf3	3.54766e-147	0.326536	0.987	0.975	7.57993e-143
Cox5a	9.45375e-147	0.410551	0.982	0.968	2.01989e-142
Asns	2.46877e-146	1.57499	0.604	0.375	5.27477e-142
Cirbp	6.96984e-146	0.813295	0.863	0.791	1.48918e-141
Tmsb10	8.72834e-145	-0.372554	0.992	0.984	1.8649e-140
Slc29a1	1.94062e-144	-0.679484	0.879	0.962	4.14633e-140
Hspa8	4.43648e-144	0.3836	0.996	0.989	9.47898e-140
Rftn2	4.86952e-142	-1.3436	0.182	0.444	1.04042e-137
Calb1	7.87602e-140	-2.5587	0.023	0.157	1.68279e-135
Uqcr11	7.90652e-140	-0.46781	0.928	0.96	1.68931e-135
Fabp5	6.5388e-139	0.469666	0.991	0.975	1.39708e-134
Actg1	2.79905e-138	0.392129	0.997	0.988	5.98045e-134
Hist1h2ac	1.69334e-136	-1.79173	0.107	0.321	3.61799e-132
Grb10	1.72776e-134	2.38215	0.37	0.112	3.69154e-130
Col5a2	4.64016e-134	-1.84576	0.09	0.29	9.91416e-130
A830036E02Rik	5.84904e-134	-2.47049	0.03	0.169	1.24971e-129
Igdcc4	6.71059e-131	-1.25393	0.204	0.463	1.43378e-126
Gas5	8.72956e-131	-0.579466	0.9	0.963	1.86516e-126
Barhl1	5.64777e-130	-0.70617	0.699	0.904	1.2067e-125
Rplp2	5.66139e-129	-0.311853	0.985	0.98	1.20961e-124
Nxph3	3.51094e-128	-1.51065	0.106	0.316	7.50148e-124
Bola2	3.44558e-127	-0.582832	0.818	0.92	7.36183e-123
Zcwpw1	8.68702e-127	-1.27308	0.195	0.446	1.85607e-122
Rps2	1.31014e-126	0.381589	0.99	0.98	2.79924e-122
Nme1	2.37362e-126	0.483689	0.966	0.947	5.07147e-122
Pcp4	1.76617e-125	-1.61099	0.118	0.331	3.7736e-121
Tmsb4x	4.98793e-125	0.439329	1	0.993	1.06572e-120
Plp1	9.79998e-125	-1.89695	0.057	0.224	2.09386e-120
Gm5617	9.92235e-124	-1.30434	0.138	0.364	2.12001e-119
Kif21b	1.89953e-123	2.43417	0.343	0.1	4.05854e-119
Sema7a	4.72303e-123	-0.885877	0.418	0.705	1.00912e-118
Pik3ip1	7.57431e-123	-1.57428	0.089	0.282	1.61833e-118
Zic4	2.18247e-121	-0.635779	0.769	0.92	4.66307e-117
Pcbp4	2.50734e-121	0.548639	0.949	0.927	5.35719e-117
Jun	1.42326e-119	-0.696661	0.916	0.969	3.04094e-115
Nme2	2.4001e-119	0.333626	0.988	0.976	5.12806e-115
Cfl1	8.44634e-119	0.311629	0.99	0.98	1.80464e-114
Srsf7	9.18307e-119	0.361706	0.99	0.985	1.96206e-114
Tshz2	2.52728e-118	-0.72923	0.628	0.853	5.39978e-114
Cops9	3.20056e-117	-0.700622	0.612	0.827	6.83832e-113
Nfic	5.30991e-117	-0.74314	0.628	0.838	1.13452e-112
Hba-a2	7.75736e-117	-5.79536	0.001	0.067	1.65744e-112
Lars2	1.42305e-116	-0.828322	0.451	0.721	3.04049e-112
Mrpl33	1.63189e-116	-0.630034	0.701	0.876	3.48671e-112
mt-Nd4	2.31344e-116	-0.38114	0.995	0.996	4.94289e-112
Uba52	3.06662e-116	-0.478144	0.839	0.953	6.55213e-112
Sfrp1	1.99321e-115	-0.515398	0.875	0.967	4.25869e-111
Slfn9	9.11721e-115	-1.43924	0.196	0.425	1.94798e-110
Rps8	1.19453e-114	-0.241283	0.994	0.991	2.55224e-110
Hist1h2bb	2.17219e-114	-1.58523	0.129	0.331	4.6411e-110
Igsf8	4.99517e-113	-0.746615	0.61	0.835	1.06727e-108
Eif5a	6.16383e-113	0.348178	0.987	0.98	1.31696e-108
Clmp	6.78517e-113	1.39828	0.542	0.319	1.44972e-108
Mthfd2	2.89478e-112	1.45259	0.572	0.388	6.18499e-108
AA465934	4.16119e-112	0.953571	0.652	0.403	8.8908e-108
Hist1h2bc	7.41728e-111	-1.69535	0.132	0.335	1.58478e-106
Tmem258	3.6519e-109	-0.533261	0.784	0.914	7.80266e-105
Trp53i11	5.30807e-109	0.923193	0.724	0.579	1.13412e-104
Tubb2a	8.18275e-109	1.28866	0.607	0.431	1.74833e-104
Pet100	9.24376e-109	-0.897436	0.394	0.651	1.97502e-104
Hey1	1.33912e-107	-0.991673	0.28	0.538	2.86115e-103
Rtraf	1.55261e-107	0.419023	0.957	0.944	3.3173e-103
Cdr1os	1.7818e-104	-2.44326	0.039	0.168	3.80698e-100
mt-Atp6	7.69388e-104	0.148908	0.999	0.999	1.64387e-99
Dgkb	3.06672e-103	-2.38663	0.025	0.136	6.55236e-99
Scn1b	6.01648e-103	-2.64427	0.017	0.115	1.28548e-98
Hist1h4h	1.1253e-102	-1.23241	0.28	0.5	2.40432e-98
Pdlim3	3.05029e-102	2.05106	0.452	0.238	6.51726e-98
Rab26os	1.70418e-101	-1.72009	0.064	0.217	3.64116e-97
Selenoh	3.10553e-101	0.458957	0.964	0.926	6.63527e-97
Ran	3.81918e-101	0.310244	0.989	0.985	8.16006e-97
Pcsk2	9.4387e-100	-1.15541	0.165	0.382	2.01667e-95
H2afz	1.56577e-99	0.324654	0.998	0.996	3.34542e-95
Mef2c	2.68023e-99	-0.992958	0.294	0.543	5.72658e-95
Mrpl52	5.96813e-98	-0.513249	0.813	0.916	1.27515e-93
Kcnh7	1.46077e-97	-1.33906	0.112	0.296	3.12108e-93
Ypel3	1.82058e-97	-0.694192	0.57	0.8	3.88985e-93
Slc3a2	1.10129e-96	0.860919	0.787	0.713	2.35302e-92
1700048O20Rik	2.89045e-96	-1.34021	0.064	0.214	6.17573e-92
Anapc13	5.39692e-96	-0.594017	0.682	0.846	1.15311e-91
Calm2	6.94215e-95	0.409219	0.993	0.982	1.48326e-90
Serf2	1.77971e-94	-0.27273	0.979	0.976	3.80253e-90
Blvrb	3.99052e-94	-0.9513	0.302	0.543	8.52616e-90
Skp1a	1.86532e-93	-0.469647	0.833	0.916	3.98544e-89
Zfand5	2.26762e-93	0.57028	0.9	0.874	4.845e-89
Dnaja1	3.83446e-93	0.340801	0.984	0.972	8.1927e-89
Foxp2	4.94911e-93	-0.853664	0.342	0.59	1.05743e-88
Cdkn1a	1.18196e-92	1.75305	0.403	0.194	2.52537e-88
Hist1h4d	1.68295e-92	-1.48464	0.421	0.573	3.59579e-88
Rpl6	3.41015e-92	-0.228901	0.993	0.988	7.28613e-88
Atp5mpl	3.70686e-91	-0.445066	0.878	0.932	7.92008e-87
Snhg11	4.20788e-91	-2.51636	0.009	0.086	8.99056e-87
Ehbp1	4.79384e-91	-1.00589	0.275	0.498	1.02425e-86
Epha7	7.38102e-91	-1.44543	0.092	0.255	1.57703e-86
A330076H08Rik	1.05327e-90	-0.750516	0.436	0.688	2.25042e-86
Pten	1.24381e-90	-0.757413	0.435	0.684	2.65753e-86
Negr1	6.51914e-90	-1.00233	0.216	0.439	1.39288e-85
Dynll1	1.63232e-89	0.379526	0.989	0.975	3.48761e-85
Kcnk1	2.13032e-89	1.05076	0.601	0.426	4.55164e-85
Hnrnpab	2.15446e-89	0.330028	0.983	0.973	4.60322e-85
Ppib	1.099e-88	-0.333228	0.987	0.99	2.34813e-84
Rcn3	1.20115e-88	-1.24692	0.149	0.341	2.56637e-84
Gm47283	1.35919e-88	-0.500991	0.797	0.944	2.90405e-84
Hist1h2bj	1.52903e-88	-1.14811	0.243	0.446	3.26692e-84
Sin3b	1.72951e-88	0.639732	0.801	0.744	3.69527e-84
Cox4i1	2.27726e-88	0.272495	0.987	0.979	4.8656e-84
Cntnap1	4.82061e-88	-0.963904	0.268	0.497	1.02997e-83
Gm2061	7.22162e-88	-2.2241	0.022	0.118	1.54297e-83
Gadd45g	1.39266e-87	1.64652	0.428	0.229	2.97555e-83
Tagln3	2.13655e-86	1.1059	0.611	0.465	4.56496e-82
Tubb5	5.18089e-86	0.344956	0.996	0.99	1.10695e-81
Spc24	8.66937e-86	0.673486	0.815	0.715	1.8523e-81
Cox17	2.03317e-85	-0.561468	0.701	0.85	4.34407e-81
Hist1h3b	2.37406e-85	-1.55843	0.096	0.254	5.07241e-81
Rpl31	4.90803e-85	-0.300854	0.968	0.963	1.04865e-80
Slc25a5	2.05666e-84	0.374063	0.972	0.961	4.39425e-80
Eldr	6.19475e-84	-1.22647	0.103	0.268	1.32357e-79
Lama2	6.61774e-84	-1.90606	0.036	0.147	1.41395e-79
Cbln3	6.79718e-84	-2.30903	0.026	0.123	1.45229e-79
Gapdh	7.06326e-84	0.301122	0.987	0.974	1.50914e-79
Sgpp2	2.30073e-83	-1.47742	0.064	0.2	4.91574e-79
Pdzrn3	3.28875e-83	2.87502	0.212	0.04	7.02673e-79
Neurod4	3.62762e-83	-1.0685	0.161	0.355	7.75078e-79
Gm10076	5.52868e-83	-0.338789	0.945	0.962	1.18126e-78
Podxl2	6.3293e-83	0.654405	0.86	0.831	1.35232e-78
Phf5a	1.38403e-82	0.506767	0.881	0.848	2.95712e-78
Hfm1	1.95104e-82	-2.92523	0.008	0.076	4.16858e-78
Psmb2	5.12557e-82	0.419045	0.93	0.913	1.09513e-77
Wnt5a	6.39098e-82	-2.19918	0.028	0.126	1.3655e-77
Smim27	7.16547e-82	-1.14263	0.124	0.299	1.53097e-77
Fam98b	2.61475e-81	-0.681659	0.476	0.703	5.58668e-77
Ifi27	4.19882e-81	-3.16782	0.007	0.072	8.97119e-77
Neo1	5.00781e-81	-0.723906	0.589	0.793	1.06997e-76
Vldlr	6.70133e-81	1.61286	0.392	0.204	1.43181e-76
Hist1h4i	8.53642e-81	-0.926802	0.341	0.552	1.82389e-76
Celf5	1.11426e-80	-1.13946	0.13	0.304	2.38073e-76
Tmem256	1.57939e-80	-0.434814	0.834	0.914	3.37453e-76
Atp5d	4.45279e-80	0.369872	0.959	0.948	9.51382e-76
Afap1	7.41777e-80	0.995395	0.607	0.471	1.58488e-75
Zeb2	8.18425e-80	-0.538338	0.76	0.903	1.74865e-75
Slc6a6	9.74876e-80	3.50955	0.181	0.024	2.08292e-75
Eef1a2	1.49755e-79	-1.98051	0.035	0.14	3.19967e-75
Cerk	2.22711e-79	-0.943129	0.203	0.406	4.75845e-75
Uqcrb	1.0207e-78	0.452881	0.909	0.853	2.18083e-74
Dleu2	1.4806e-78	-0.777483	0.5	0.707	3.16345e-74
Ndufa5	1.55543e-78	-0.437532	0.82	0.91	3.32334e-74
Sdc2	1.95948e-78	-1.40168	0.07	0.207	4.18663e-74
Pvalb	2.50172e-78	1.63177	0.531	0.393	5.34517e-74
Morf4l1	4.58147e-78	-0.319777	0.954	0.97	9.78876e-74
Sash1	2.40887e-77	-1.177	0.147	0.325	5.14679e-73
S100a10	4.13152e-77	-2.64586	0.014	0.091	8.8274e-73
Arrdc3	4.704e-77	-0.938818	0.291	0.507	1.00506e-72
Jpt1	5.09246e-77	0.447215	0.967	0.952	1.08805e-72
Mgst1	8.10866e-77	-1.37398	0.073	0.21	1.7325e-72
Pqlc1	9.03099e-77	0.96627	0.638	0.523	1.92956e-72
Sumo2	1.03557e-76	0.235347	0.993	0.987	2.2126e-72
Srsf3	1.07907e-76	0.253391	0.994	0.993	2.30553e-72
Nupr1	4.69609e-76	3.97293	0.157	0.013	1.00337e-71
Pde1a	6.31906e-76	-2.17426	0.02	0.105	1.35013e-71
Mdga1	1.28506e-75	-0.650613	0.493	0.723	2.74566e-71
Chac1	2.41215e-75	4.94663	0.147	0.008	5.15381e-71
Tlx3	2.58469e-75	1.0123	0.637	0.507	5.52245e-71
Atp5j2	7.83984e-75	-0.272621	0.962	0.966	1.67506e-70
Gadd45gip1	2.17165e-74	1.30299	0.417	0.241	4.63994e-70
Kctd12b	6.15655e-74	-1.8291	0.029	0.123	1.31541e-69
Cox20	7.38185e-74	-0.630508	0.463	0.692	1.57721e-69
Cd82	9.21246e-74	1.81113	0.313	0.133	1.96833e-69
Polr2l	2.08935e-73	-0.838365	0.211	0.416	4.46411e-69
Rps3a1	2.95987e-73	0.206312	0.994	0.988	6.32405e-69
Hnrnpf	3.38281e-73	0.320062	0.978	0.967	7.2277e-69
Dnm1	7.1058e-73	-1.70887	0.044	0.153	1.51823e-68
Pde7b	2.50681e-72	-2.89853	0.006	0.065	5.35605e-68
Hmgn3	3.10429e-72	-0.544001	0.641	0.817	6.63264e-68
Edaradd	3.74394e-72	-1.65278	0.033	0.13	7.9993e-68
Hist1h3f	4.85058e-72	-1.24395	0.136	0.298	1.03637e-67
Snhg6	8.39557e-72	-0.682933	0.442	0.658	1.7938e-67
Popdc3	3.13783e-71	-1.8357	0.041	0.144	6.70429e-67
Slc1a2	3.19271e-71	-0.580506	0.673	0.849	6.82154e-67
Smoc1	5.88171e-71	-0.951685	0.205	0.396	1.25669e-66
Rpl22l1	6.53521e-71	-0.299802	0.967	0.97	1.39631e-66
Ndufc2	9.82933e-71	0.344911	0.961	0.954	2.10013e-66
Psat1	1.06041e-70	0.665162	0.757	0.683	2.26568e-66
Ftl1	2.00725e-70	0.266145	0.991	0.98	4.2887e-66
Rpl22	2.17626e-70	-0.241697	0.983	0.975	4.64979e-66
Ktn1	3.16881e-70	-0.540865	0.743	0.894	6.77049e-66
Trps1	3.25663e-70	-0.835032	0.334	0.544	6.95811e-66
Vsnl1	3.44255e-70	-2.19136	0.026	0.114	7.35535e-66
Fth1	1.19572e-69	0.239249	0.99	0.981	2.55476e-65
Abcc5	1.46139e-69	-0.773108	0.36	0.587	3.12241e-65
Sdk1	2.06428e-69	-1.08666	0.128	0.29	4.41054e-65
Nop10	5.07487e-69	-0.406148	0.842	0.915	1.0843e-64
Rprml	8.07623e-69	-0.973982	0.129	0.285	1.72557e-64
Cbfa2t3	2.40087e-68	-0.567882	0.635	0.818	5.1297e-64
Tsix	5.8102e-68	-1.01975	0.233	0.431	1.24141e-63
Nek7	7.538e-68	-0.793816	0.257	0.466	1.61057e-63
Sept8	9.00506e-68	1.22394	0.454	0.292	1.92402e-63
Rmst	1.43938e-67	-0.987357	0.159	0.33	3.07538e-63
Itsn1	1.51786e-67	1.11468	0.532	0.404	3.24307e-63
Ghr	2.4474e-67	-1.74162	0.035	0.13	5.22911e-63
Eno2	3.00965e-67	-1.82259	0.022	0.103	6.43042e-63
Hpca	4.20087e-67	1.0953	0.631	0.511	8.97557e-63
Krt10	4.80625e-67	-0.740133	0.383	0.594	1.0269e-62
Ndufc1	5.81982e-67	-0.342573	0.894	0.937	1.24346e-62
Npm1	1.01174e-66	0.265886	0.993	0.992	2.16168e-62
Dctn3	3.20989e-66	0.520869	0.844	0.834	6.85824e-62
Slc17a6	3.53314e-66	-0.761121	0.238	0.43	7.54891e-62
mt-Co3	3.98792e-66	0.162083	0.999	0.999	8.52058e-62
Cox8a	4.06921e-66	-0.208384	0.988	0.988	8.69426e-62
Dnajc21	4.14634e-66	0.70184	0.719	0.661	8.85906e-62
Mrps21	6.60649e-66	-0.439373	0.719	0.867	1.41154e-61
Gm11808	1.26607e-65	-0.656298	0.334	0.552	2.70508e-61
Ptgr1	1.32894e-65	-1.05711	0.1	0.243	2.83941e-61
Clk1	1.49159e-65	-0.613291	0.549	0.747	3.18693e-61
Lsm4	1.69448e-65	0.38582	0.938	0.912	3.62042e-61
Ank3	2.4514e-65	-0.392527	0.829	0.939	5.23766e-61
Ppp1r14c	3.61817e-65	0.749005	0.747	0.685	7.73058e-61
Rps10	8.3377e-65	0.202863	0.991	0.986	1.78143e-60
Gm26917	1.04254e-64	-0.68847	0.601	0.779	2.22749e-60
Lhx1	1.28468e-64	-0.527867	0.745	0.874	2.74485e-60
Marcks	2.75715e-64	0.238644	0.993	0.987	5.89093e-60
Pcm1	3.90786e-64	-0.428366	0.826	0.923	8.34954e-60
Mrpl20	3.92214e-64	0.407893	0.914	0.887	8.38005e-60
Sox11	4.16696e-64	0.450613	0.98	0.975	8.90312e-60
Basp1	5.12066e-64	0.346969	0.995	0.989	1.09408e-59
Mndal	6.45831e-64	-0.872319	0.187	0.36	1.37988e-59
Grin2b	1.33651e-63	2.78338	0.191	0.049	2.85558e-59
Tcf7l2	2.15214e-63	-1.16907	0.107	0.248	4.59826e-59
Tmem223	3.05401e-63	0.587554	0.751	0.617	6.5252e-59
Tpm3-rs7	3.91336e-63	-0.614861	0.235	0.448	8.36129e-59
Arid1b	8.04233e-63	-0.673698	0.399	0.608	1.71832e-58
Eif4ebp1	3.72527e-62	1.53315	0.427	0.285	7.95942e-58
Hist1h2ai	4.6008e-62	-1.42802	0.053	0.16	9.83007e-58
AI506816	4.82859e-62	-0.742241	0.263	0.46	1.03168e-57
Ndufb2	7.16819e-62	-0.381968	0.809	0.906	1.53156e-57
Uqcr10	8.55385e-62	-0.341743	0.87	0.926	1.82762e-57
Cdkn1c	8.91144e-62	1.28906	0.468	0.316	1.90402e-57
Sec61g	1.08573e-61	-0.250203	0.968	0.968	2.31977e-57
Selenon	1.26947e-61	-0.793076	0.249	0.443	2.71236e-57
Nt5e	3.56287e-61	-1.72264	0.033	0.121	7.61244e-57
Atp6v1g1	8.63229e-61	0.376277	0.933	0.923	1.84438e-56
Sem1	9.69214e-61	-0.235379	0.971	0.966	2.07082e-56
Nudt21	9.85811e-61	0.410218	0.892	0.867	2.10628e-56
Rrbp1	1.28121e-60	-0.720705	0.359	0.566	2.73743e-56
Chchd2	1.6276e-60	0.214213	0.99	0.978	3.47753e-56
Ppp2r2b	1.73818e-60	1.85085	0.286	0.132	3.71379e-56
Ube2i	2.62384e-60	0.332153	0.951	0.942	5.60609e-56
Ift27	4.47631e-60	0.647782	0.694	0.619	9.56409e-56
Gm7324	5.44592e-60	-0.879605	0.137	0.291	1.16358e-55
Tceal3	7.04691e-60	-0.821493	0.23	0.415	1.50564e-55
4933431E20Rik	1.15332e-59	-1.36652	0.072	0.19	2.46419e-55
Cotl1	1.96249e-59	1.26254	0.428	0.287	4.19306e-55
Rack1	2.56028e-59	0.250122	0.985	0.972	5.47028e-55
Ndufa1	2.92119e-59	-0.427889	0.731	0.866	6.24142e-55
Atf4	6.94585e-59	0.547354	0.8	0.761	1.48405e-54
Mest	7.71562e-59	1.3154	0.367	0.203	1.64852e-54
Cetn2	1.20204e-58	-0.616048	0.423	0.627	2.56827e-54
Cdca7	1.68968e-58	-0.589064	0.573	0.735	3.61017e-54
Snu13	1.72724e-58	0.383461	0.927	0.915	3.69042e-54
Hspe1	2.82768e-58	-0.323061	0.924	0.957	6.04161e-54
Man1c1	4.06334e-58	-0.625741	0.363	0.573	8.68173e-54
U2af1	4.30452e-58	0.328206	0.956	0.938	9.19703e-54
Dmd	4.47992e-58	-1.26914	0.063	0.172	9.57181e-54
Hist1h3e	5.40912e-58	-0.995857	0.286	0.444	1.15571e-53
Pard3b	5.52054e-58	-1.08823	0.123	0.266	1.17952e-53
Hspa1b	6.67436e-58	-3.37558	0.013	0.073	1.42604e-53
Idh2	8.04092e-58	0.526767	0.827	0.798	1.71802e-53
Shmt2	1.07073e-57	0.94876	0.577	0.485	2.28772e-53
Srp9	1.13775e-57	0.433098	0.871	0.834	2.43092e-53
D330041H03Rik	1.19443e-57	-1.33448	0.068	0.18	2.55202e-53
Ifitm2	1.29081e-57	-0.589619	0.46	0.667	2.75794e-53
Tnfaip8	2.93687e-57	-0.589095	0.417	0.626	6.27491e-53
Csnk1e	3.25429e-57	0.478915	0.85	0.821	6.95312e-53
Unc80	4.6067e-57	-1.26724	0.069	0.181	9.84268e-53
Gm16104	5.40823e-57	-1.86889	0.051	0.149	1.15552e-52
Gpc3	5.79759e-57	-1.04991	0.122	0.262	1.23871e-52
Rpl21	6.96864e-57	0.178862	0.991	0.988	1.48892e-52
Foxf2	9.01076e-57	-1.44635	0.057	0.16	1.92524e-52
Ndufb9	1.26624e-56	0.262114	0.972	0.973	2.70544e-52
Atp2b2	1.62895e-56	-0.689938	0.395	0.594	3.48042e-52
Xist	1.84084e-56	-0.35718	0.983	0.993	3.93315e-52
Son	2.44497e-56	-0.309873	0.95	0.981	5.22392e-52
Psma3	4.06002e-56	0.290832	0.968	0.96	8.67463e-52
Dbndd2	6.24245e-56	-0.926609	0.163	0.32	1.33376e-51
Gm9885	9.73228e-56	-1.13702	0.07	0.182	2.0794e-51
Ppwd1	1.17964e-55	-0.661708	0.357	0.554	2.52043e-51
Rbis	1.51826e-55	-0.430021	0.71	0.857	3.24391e-51
Dock9	1.88597e-55	-1.6249	0.032	0.114	4.02957e-51
Fcgrt	2.4458e-55	-1.77107	0.027	0.104	5.22569e-51
Hist1h2br	2.75837e-55	-1.08985	0.112	0.245	5.89353e-51
Cacng2	3.31097e-55	-0.479532	0.673	0.824	7.07422e-51
Jam2	4.13433e-55	-0.941667	0.118	0.257	8.83342e-51
Hist1h2af	6.13979e-55	-1.12203	0.151	0.294	1.31183e-50
Jph1	6.34733e-55	-0.936934	0.135	0.282	1.35617e-50
Ncam1	7.27776e-55	-0.33958	0.895	0.964	1.55497e-50
Il18	7.81567e-55	-2.11816	0.018	0.083	1.6699e-50
Ero1lb	1.03095e-54	-1.11567	0.092	0.215	2.20273e-50
Ebf2	1.03465e-54	1.27957	0.353	0.205	2.21064e-50
Zfpm1	1.93958e-54	1.2158	0.343	0.189	4.14411e-50
Rps17	3.74252e-54	-0.206672	0.979	0.975	7.99628e-50
Manf	6.5393e-54	0.431049	0.91	0.898	1.39719e-49
Snap25	6.78516e-54	-0.659494	0.496	0.692	1.44972e-49
Stk17b	9.19209e-54	-0.604277	0.375	0.57	1.96398e-49
Fkbp3	1.22784e-53	-0.258692	0.954	0.959	2.6234e-49
Ddx5	1.29934e-53	0.191351	0.997	0.996	2.77618e-49
Cbln4	1.53718e-53	1.80939	0.223	0.085	3.28434e-49
Grm4	1.92292e-53	-1.75992	0.035	0.117	4.10851e-49
Klhl35	4.36032e-53	3.32269	0.13	0.019	9.31626e-49
Sox9	6.25131e-53	-0.613284	0.472	0.659	1.33565e-48
Cbx5	6.71002e-53	-0.298933	0.922	0.962	1.43366e-48
Nudcd3	1.55877e-52	-0.565519	0.522	0.71	3.33046e-48
Insm1	2.0133e-52	0.425094	0.925	0.896	4.30161e-48
Prkcq	3.87978e-52	-1.22987	0.071	0.179	8.28953e-48
Gnb4	4.76348e-52	-0.708862	0.265	0.448	1.01776e-47
Cdv3	6.0224e-52	0.411774	0.881	0.863	1.28675e-47
Nav2	1.1356e-51	0.857196	0.623	0.539	2.42632e-47
Tmem163	1.82587e-51	-0.418567	0.512	0.717	3.90116e-47
Mir99ahg	2.10084e-51	-0.506918	0.735	0.866	4.48866e-47
Smarca2	2.50765e-51	-0.548562	0.473	0.659	5.35784e-47
Zcchc7	2.65687e-51	-0.640164	0.415	0.612	5.67666e-47
Ezh1	3.28984e-51	-1.08052	0.094	0.213	7.02908e-47
Mgat4c	4.0346e-51	-1.21323	0.059	0.157	8.62032e-47
Pou3f2	5.66153e-51	-0.385968	0.765	0.879	1.20964e-46
Snrpd1	6.47766e-51	0.260869	0.974	0.963	1.38402e-46
Col11a1	8.09088e-51	-0.768114	0.234	0.403	1.7287e-46
Bhlhe41	8.75949e-51	-1.63272	0.036	0.117	1.87155e-46
Hspa1a	9.66891e-51	-2.82924	0.013	0.07	2.06586e-46
Gtf2a2	1.3362e-50	0.347784	0.92	0.909	2.85492e-46
Rrm2	1.91098e-50	0.545697	0.787	0.694	4.083e-46
Chn2	2.06632e-50	-1.64441	0.046	0.133	4.4149e-46
Map3k1	2.34627e-50	-0.357131	0.844	0.929	5.01304e-46
Hspa2	2.66867e-50	-0.577928	0.366	0.559	5.70188e-46
2810429I04Rik	3.45126e-50	-1.83452	0.028	0.101	7.37395e-46
Hist1h2bn	4.31309e-50	-1.24823	0.073	0.18	9.21534e-46
Lmo4	4.38535e-50	0.651782	0.749	0.7	9.36973e-46
Rpap3	4.43651e-50	-0.691619	0.242	0.417	9.47906e-46
Ppp1r14b	5.60883e-50	0.2295	0.99	0.986	1.19838e-45
Rpp38	5.98411e-50	-0.791333	0.152	0.297	1.27856e-45
Dhrs7	6.74822e-50	-0.922098	0.145	0.287	1.44182e-45
6330403K07Rik	6.81831e-50	-0.641608	0.284	0.466	1.4568e-45
Glipr2	7.23541e-50	1.92395	0.2	0.073	1.54592e-45
Pabpn1	8.30828e-50	0.253852	0.976	0.971	1.77515e-45
Pgf	1.67986e-49	1.78102	0.235	0.101	3.5892e-45
Ccdc191	1.86191e-49	-1.03206	0.108	0.232	3.97815e-45
D430020J02Rik	1.92923e-49	-1.56247	0.037	0.117	4.12199e-45
Lmo1	3.52632e-49	-0.888215	0.107	0.231	7.53434e-45
Ranbp1	3.75958e-49	0.283037	0.977	0.965	8.03271e-45
Igf2	6.77403e-49	1.40555	0.285	0.139	1.44734e-44
Ccser2	7.67159e-49	0.989519	0.47	0.359	1.63911e-44
Plppr5	8.59147e-49	-0.967888	0.087	0.202	1.83565e-44
Slirp	1.06359e-48	-0.45372	0.597	0.771	2.27247e-44
Traf4	1.14632e-48	0.797047	0.53	0.415	2.44923e-44
Gas7	1.30567e-48	-1.95324	0.026	0.094	2.78969e-44
Akap7	1.66461e-48	-0.990155	0.095	0.213	3.55661e-44
Ccdc173	1.90882e-48	-1.23394	0.06	0.157	4.07838e-44
Btbd11	1.9363e-48	-0.882112	0.114	0.241	4.1371e-44
Rragb	1.991e-48	-1.11785	0.071	0.174	4.25396e-44
Gm12676	2.30157e-48	-1.15348	0.057	0.152	4.91753e-44
Hmgb3	3.50449e-48	0.302311	0.973	0.952	7.4877e-44
Pou3f3	8.59879e-48	-0.504428	0.423	0.617	1.83722e-43
Cyth2	9.99765e-48	0.544534	0.748	0.709	2.1361e-43
Lxn	1.01189e-47	-0.905893	0.111	0.235	2.16201e-43
Srek1ip1	1.03222e-47	-0.626787	0.277	0.456	2.20544e-43
Cdk5rap1	1.36808e-47	-1.31346	0.06	0.155	2.92304e-43
Crip2	2.33129e-47	0.837518	0.56	0.442	4.98104e-43
Hebp1	2.3992e-47	-1.53919	0.035	0.113	5.12612e-43
Psma7	2.56386e-47	0.274948	0.97	0.956	5.47794e-43
Atoh1	3.60604e-47	-0.513169	0.326	0.52	7.70467e-43
Ube2m	3.60852e-47	0.337666	0.913	0.905	7.70996e-43
Gng5	7.20602e-47	-0.25862	0.934	0.958	1.53964e-42
Atp5o	7.71568e-47	0.287453	0.959	0.939	1.64853e-42
Psmb3	1.3064e-46	0.339006	0.922	0.915	2.79125e-42
Taf1d	1.34208e-46	-0.461431	0.668	0.819	2.86749e-42
A230057D06Rik	1.44122e-46	-0.795943	0.157	0.298	3.07931e-42
Cavin3	1.46786e-46	-0.623265	0.324	0.497	3.13623e-42
Gm3739	1.52286e-46	-1.43164	0.026	0.095	3.25374e-42
Mif	1.64725e-46	0.317563	0.962	0.956	3.51952e-42
Slc16a2	1.79241e-46	-0.837025	0.153	0.293	3.82966e-42
Trmt10a	1.94718e-46	-0.793114	0.232	0.391	4.16035e-42
Ak6	2.13761e-46	0.574629	0.69	0.623	4.56721e-42
Anp32a	2.73209e-46	-0.218333	0.966	0.969	5.83739e-42
Ech1	3.47265e-46	-0.574832	0.293	0.482	7.41966e-42
Calcrl	3.5515e-46	-1.42073	0.062	0.155	7.58815e-42
Itgb8	3.56842e-46	-1.05055	0.084	0.192	7.62429e-42
Ybx2	3.78031e-46	-0.857726	0.096	0.211	8.07701e-42
Pcbd2	4.30079e-46	-0.792366	0.128	0.258	9.18907e-42
Aldh1l2	4.85007e-46	1.8206	0.199	0.077	1.03627e-41
Plxna2	5.63435e-46	1.75487	0.218	0.093	1.20384e-41
Hist2h2aa1	6.88135e-46	-1.00945	0.155	0.288	1.47027e-41
Sec62	8.71905e-46	-0.427412	0.718	0.854	1.86291e-41
Kndc1	8.93405e-46	-2.26858	0.01	0.057	1.90885e-41
Cdca7l	9.12253e-46	-0.659946	0.257	0.428	1.94912e-41
9130008F23Rik	1.12507e-45	-2.07066	0.015	0.07	2.40382e-41
Psmd8	1.28231e-45	0.390397	0.867	0.847	2.73978e-41
S100a11	1.60564e-45	-1.41816	0.035	0.109	3.43061e-41
Pls3	1.65675e-45	-0.716838	0.163	0.308	3.53982e-41
Jund	1.69827e-45	-0.333818	0.962	0.983	3.62852e-41
Ikzf2	1.7316e-45	-1.12415	0.08	0.184	3.69975e-41
Arid5b	2.15967e-45	-0.931475	0.124	0.249	4.61436e-41
Ppp1r9a	2.20503e-45	-0.525327	0.406	0.593	4.71126e-41
Chchd10	2.75478e-45	-1.51338	0.053	0.14	5.88587e-41
Sncb	2.81086e-45	-1.28514	0.049	0.134	6.00568e-41
Cacybp	3.57959e-45	0.335162	0.918	0.9	7.64814e-41
Echdc1	3.76924e-45	-0.824835	0.133	0.264	8.05335e-41
Myh7b	3.84491e-45	3.14933	0.118	0.021	8.21503e-41
Eif4g2	4.25499e-45	0.233141	0.985	0.977	9.09121e-41
Gpx8	4.55229e-45	-1.04119	0.1	0.213	9.72643e-41
Epb41l2	4.69088e-45	-0.644164	0.32	0.498	1.00225e-40
Prdm13	5.18531e-45	1.52144	0.26	0.133	1.10789e-40
Pnrc1	6.5551e-45	-0.412628	0.703	0.844	1.40056e-40
E130102H24Rik	6.60727e-45	-0.964277	0.09	0.2	1.41171e-40
Ost4	7.06102e-45	-0.394069	0.702	0.835	1.50866e-40
Ncald	7.23484e-45	1.0548	0.39	0.258	1.5458e-40
Schip1	9.48607e-45	-0.482344	0.419	0.606	2.02679e-40
1810026B05Rik	1.37285e-44	-0.460491	0.553	0.743	2.93323e-40
Serf1	1.79594e-44	-0.380086	0.701	0.844	3.83721e-40
Evc2	2.04097e-44	-1.43151	0.043	0.123	4.36073e-40
Cpe	2.12529e-44	-0.367923	0.659	0.82	4.54089e-40
Tmem176b	2.13075e-44	1.23368	0.292	0.158	4.55256e-40
Smco4	2.67912e-44	-0.376788	0.724	0.846	5.7242e-40
H2afj	3.5745e-44	-0.383737	0.702	0.823	7.63727e-40
Olfm3	4.28278e-44	-1.84217	0.015	0.069	9.15058e-40
Psph	5.10181e-44	1.36299	0.373	0.26	1.09005e-39
Synrg	5.51857e-44	-0.604278	0.384	0.563	1.1791e-39
Atp5f1	5.71701e-44	0.217714	0.981	0.973	1.2215e-39
Ticam2	7.23018e-44	-1.21747	0.055	0.143	1.5448e-39
Rpl27a	1.18958e-43	-0.141887	0.995	0.994	2.54166e-39
Tvp23b	1.23526e-43	-0.677249	0.191	0.34	2.63925e-39
Mtln	1.39536e-43	-0.613964	0.318	0.496	2.98134e-39
Ubl5	1.49377e-43	-0.235529	0.921	0.949	3.19158e-39
Ankrd10	1.50514e-43	0.612206	0.606	0.524	3.21588e-39
Dbn1	1.9289e-43	0.65218	0.65	0.572	4.12128e-39
Tubb2b	1.94316e-43	0.362206	0.987	0.976	4.15175e-39
Tll1	1.99648e-43	-1.08024	0.06	0.15	4.26569e-39
Kif5b	2.23764e-43	0.333631	0.905	0.89	4.78094e-39
Pid1	3.34975e-43	-0.745635	0.145	0.277	7.15708e-39
Atp6v0e	3.77934e-43	0.437555	0.84	0.822	8.07495e-39
Ctbp1	4.3246e-43	0.354369	0.876	0.86	9.23995e-39
Prmt1	6.14362e-43	0.254433	0.962	0.963	1.31265e-38
Cep290	6.91828e-43	-0.573241	0.385	0.558	1.47816e-38
Btbd17	7.29846e-43	0.679903	0.571	0.463	1.55939e-38
Dnaja2	7.53046e-43	0.393414	0.856	0.844	1.60896e-38
Gstm5	8.0475e-43	-0.421157	0.659	0.812	1.71943e-38
Gli3	9.05427e-43	-0.993363	0.08	0.182	1.93453e-38
Apoe	1.02823e-42	-1.11211	0.105	0.219	2.19691e-38
Morn2	1.1676e-42	-0.668259	0.198	0.348	2.49469e-38
Timm23	1.26422e-42	0.333282	0.918	0.91	2.70114e-38
Per3	1.65643e-42	-1.13901	0.062	0.153	3.53912e-38
Cspp1	1.77093e-42	-0.470391	0.539	0.71	3.78378e-38
Ufsp2	2.62614e-42	-0.648315	0.241	0.398	5.61102e-38
Fgf12	2.83602e-42	-0.981484	0.081	0.183	6.05943e-38
Cxcl14	4.15119e-42	1.48485	0.273	0.147	8.86944e-38
Myo10	4.75508e-42	0.896249	0.4	0.273	1.01597e-37
Zfpm2	5.09122e-42	-0.621761	0.135	0.265	1.08779e-37
Gnas	7.92602e-42	-0.144953	0.992	0.981	1.69347e-37
Olfml2b	9.18137e-42	3.16636	0.102	0.014	1.96169e-37
Rps3	9.2893e-42	0.147622	0.995	0.99	1.98475e-37
Gabarapl1	1.04664e-41	-0.641929	0.229	0.39	2.23624e-37
Gca	1.21234e-41	-1.44106	0.027	0.092	2.59028e-37
Psmc3ip	1.26506e-41	0.668228	0.635	0.586	2.70292e-37
Lsm2	1.34077e-41	0.36681	0.867	0.845	2.8647e-37
Nynrin	1.45619e-41	-1.20876	0.056	0.143	3.1113e-37
Apc	1.73045e-41	0.566825	0.757	0.723	3.69729e-37
Cacna1d	1.81572e-41	-1.02279	0.072	0.168	3.87947e-37
9630028B13Rik	2.07121e-41	-2.3519	0.008	0.051	4.42534e-37
Smarca5	2.64959e-41	0.302906	0.939	0.941	5.66112e-37
Eif3j2	2.66217e-41	-0.683233	0.158	0.294	5.68799e-37
Ntn1	3.55652e-41	-0.677358	0.239	0.396	7.59886e-37
Tbcb	3.56205e-41	0.379627	0.87	0.857	7.61067e-37
Pclo	4.41338e-41	-0.701105	0.282	0.442	9.42964e-37
Ccdc39	5.09828e-41	-1.20237	0.049	0.129	1.0893e-36
Bex3	6.14019e-41	0.242144	0.97	0.962	1.31191e-36
Gm17750	7.668e-41	-0.46774	0.509	0.676	1.63834e-36
Atp1b2	8.80378e-41	-0.943581	0.119	0.234	1.88102e-36
Map1lc3a	1.20854e-40	0.41617	0.852	0.839	2.58217e-36
Cdk19	1.29292e-40	-0.486174	0.346	0.525	2.76246e-36
Lrrc59	1.32966e-40	0.554617	0.66	0.613	2.84096e-36
Itgb3bp	1.52557e-40	-0.495814	0.397	0.572	3.25954e-36
Mapt	1.87001e-40	-0.60253	0.252	0.406	3.99547e-36
Nap1l5	1.91035e-40	-0.764683	0.114	0.229	4.08165e-36
Psma2	2.02978e-40	0.278215	0.94	0.934	4.33684e-36
Srebf1	2.1535e-40	-0.560995	0.409	0.582	4.60117e-36
Txnrd1	2.43968e-40	0.36948	0.846	0.826	5.21262e-36
Hk2	3.26521e-40	0.671303	0.559	0.459	6.97644e-36
Map4k4	3.28182e-40	-0.278477	0.932	0.973	7.01193e-36
Sesn1	3.86615e-40	-0.622047	0.21	0.361	8.26041e-36
Bzw1	4.5968e-40	0.288122	0.946	0.931	9.82153e-36
Rpl18	7.9557e-40	0.1578	0.994	0.993	1.69982e-35
Cox7a2	1.12648e-39	-0.172304	0.979	0.977	2.40684e-35
Sox4	1.20794e-39	0.349039	0.931	0.928	2.58089e-35
Snhg8	1.22571e-39	-0.439776	0.589	0.748	2.61886e-35
Pgls	1.25404e-39	0.304375	0.919	0.922	2.67939e-35
Ptpn13	1.46003e-39	-1.50532	0.027	0.09	3.11951e-35
Gtf3c1	1.5637e-39	-0.518824	0.494	0.671	3.341e-35
Mir100hg	1.70007e-39	-0.643072	0.291	0.445	3.63236e-35
Hist2h2bb	1.77305e-39	-0.771382	0.152	0.277	3.7883e-35
1810009A15Rik	2.07006e-39	-0.827383	0.101	0.211	4.42289e-35
Cwf19l2	2.08038e-39	-0.57532	0.343	0.514	4.44493e-35
Plscr1	2.91325e-39	-0.916662	0.093	0.196	6.22444e-35
Eef1b2	3.39107e-39	0.190004	0.986	0.978	7.24536e-35
Abcc1	3.96041e-39	-0.805059	0.135	0.256	8.4618e-35
Sez6	4.41905e-39	2.14377	0.166	0.062	9.44175e-35
Arl3	4.45679e-39	-0.341397	0.726	0.854	9.52238e-35
D3Ertd751e	4.49845e-39	-0.760345	0.131	0.25	9.61139e-35
Rps11	4.82524e-39	0.138989	0.992	0.985	1.03096e-34
Cacnb2	5.21001e-39	-1.91392	0.014	0.063	1.11317e-34
Rnd3	5.48527e-39	-0.331608	0.836	0.91	1.17198e-34
Epb41l4aos	5.90705e-39	-0.656944	0.24	0.394	1.2621e-34
Sacs	5.9563e-39	-0.464381	0.596	0.759	1.27262e-34
Arl4a	6.43606e-39	-0.654339	0.211	0.353	1.37513e-34
Marcksl1	6.77158e-39	0.252754	0.966	0.955	1.44682e-34
Sh3bgrl	7.50235e-39	-0.36786	0.704	0.833	1.60295e-34
Hist1h3i	8.928e-39	-0.815959	0.111	0.222	1.90756e-34
Tipin	9.16913e-39	0.452023	0.8	0.762	1.95908e-34
Gpc6	1.14289e-38	-0.775741	0.172	0.307	2.44189e-34
Rps5	1.22603e-38	0.150096	0.994	0.988	2.61953e-34
Pcdh18	1.37144e-38	-0.764298	0.186	0.319	2.93022e-34
Txnip	1.49389e-38	-0.655172	0.278	0.43	3.19184e-34
Rbp4	1.54512e-38	-0.52127	0.355	0.521	3.3013e-34
Tgfb2	1.80085e-38	-0.49491	0.394	0.567	3.84769e-34
Nsun6	1.89036e-38	-0.884234	0.109	0.219	4.03895e-34
Zfp160	1.89642e-38	-0.775299	0.133	0.255	4.05189e-34
Supt20	1.95551e-38	-0.494951	0.427	0.605	4.17815e-34
Nsrp1	2.01263e-38	-0.489549	0.339	0.507	4.30019e-34
Plscr4	2.16079e-38	-1.04864	0.055	0.136	4.61675e-34
Snx7	2.18575e-38	-0.809549	0.108	0.219	4.67007e-34
Aifm1	2.38596e-38	-0.52827	0.322	0.495	5.09785e-34
Prdx2	2.52911e-38	0.186589	0.989	0.981	5.40371e-34
Gcc2	2.8986e-38	-0.576517	0.373	0.54	6.19316e-34
St6galnac5	3.3688e-38	-1.61245	0.026	0.086	7.19778e-34
Hddc2	3.73898e-38	-0.564582	0.242	0.398	7.9887e-34
Cc2d2a	3.81356e-38	-0.824052	0.122	0.236	8.14806e-34
Metap2	4.3795e-38	-0.261387	0.904	0.941	9.35723e-34
Dpyd	4.42773e-38	-2.11932	0.011	0.055	9.46029e-34
Tuba4a	5.10203e-38	-1.77656	0.024	0.081	1.0901e-33
Asph	5.18812e-38	-0.549139	0.27	0.425	1.10849e-33
Hist1h4k	5.34857e-38	-1.7064	0.016	0.065	1.14278e-33
Ptn	6.28172e-38	0.45625	0.84	0.764	1.34215e-33
Srp14	7.67463e-38	0.293034	0.924	0.91	1.63976e-33
Emc6	7.85227e-38	0.378261	0.827	0.826	1.67772e-33
Cep126	9.80409e-38	-1.25528	0.047	0.122	2.09474e-33
B3gnt5	1.11562e-37	-0.557367	0.249	0.401	2.38363e-33
Tbc1d32	1.15399e-37	-1.03133	0.061	0.145	2.46562e-33
Dubr	1.1715e-37	-1.70621	0.016	0.066	2.50302e-33
Gria3	1.28682e-37	-0.937824	0.082	0.178	2.74942e-33
Scn2b	1.55446e-37	-2.2148	0.011	0.053	3.32126e-33
Upf2	1.56559e-37	-0.561427	0.273	0.432	3.34505e-33
Necab3	1.80152e-37	1.45575	0.24	0.125	3.84914e-33
Pcsk2os1	2.1345e-37	-0.908734	0.078	0.173	4.56057e-33
eGFPcre	2.21592e-37	0.692068	0.505	0.408	4.73453e-33
Mtus1	2.3064e-37	-0.684501	0.209	0.35	4.92785e-33
Hist1h4b	2.36459e-37	-1.64426	0.016	0.064	5.05218e-33
Rplp0	2.73863e-37	0.153446	0.994	0.993	5.85136e-33
4933404O12Rik	3.00382e-37	-0.64599	0.164	0.296	6.41797e-33
Mxra7	3.22384e-37	1.36769	0.266	0.152	6.88806e-33
Mbnl1	3.66532e-37	-0.479294	0.437	0.608	7.83132e-33
Cabp1	4.49302e-37	1.96726	0.148	0.051	9.59978e-33
Hist1h2bf	5.02181e-37	-0.932487	0.053	0.132	1.07296e-32
Pde3a	6.5395e-37	-0.629098	0.219	0.361	1.39723e-32
Ahi1	7.07225e-37	-0.404319	0.598	0.756	1.51106e-32
Cmtm4	7.44195e-37	-0.471034	0.417	0.587	1.59005e-32
A930019D19Rik	8.62634e-37	3.0124	0.1	0.018	1.8431e-32
Cttnbp2	9.07325e-37	-0.689746	0.228	0.371	1.93859e-32
Kctd12	9.12973e-37	-0.949001	0.1	0.202	1.95066e-32
Vim	9.194e-37	-0.333247	0.737	0.867	1.96439e-32
Dnajc12	9.53302e-37	-1.09706	0.049	0.126	2.03682e-32
Naca	9.94081e-37	0.154111	0.989	0.983	2.12395e-32
D430042O09Rik	1.60668e-36	-0.718137	0.194	0.328	3.43284e-32
Lsm7	1.61951e-36	-0.258038	0.874	0.935	3.46025e-32
Cpne3	1.7051e-36	-0.536157	0.263	0.42	3.64313e-32
Bloc1s1	1.90607e-36	-0.567744	0.258	0.409	4.07251e-32
Shisal2b	1.96854e-36	-0.658853	0.15	0.273	4.20598e-32
Rnf121	2.1367e-36	-0.670272	0.276	0.431	4.56527e-32
Akap6	2.33817e-36	-0.437782	0.578	0.736	4.99574e-32
Ube2a	2.64851e-36	0.641561	0.566	0.5	5.6588e-32
Igf1r	2.94539e-36	-0.496662	0.362	0.535	6.29312e-32
Hspa9	4.9147e-36	0.452538	0.805	0.81	1.05008e-31
Dbi	5.0193e-36	-0.257028	0.893	0.944	1.07242e-31
Ccdc73	5.17012e-36	-1.85468	0.013	0.057	1.10465e-31
Hrk	5.2739e-36	1.10438	0.238	0.12	1.12682e-31
Oxct1	6.31989e-36	-0.282218	0.844	0.91	1.35031e-31
Rpl19	7.26986e-36	0.127748	0.995	0.992	1.55328e-31
6530402F18Rik	7.46962e-36	-1.6042	0.021	0.074	1.59596e-31
Dcaf8	8.39239e-36	-0.429665	0.501	0.678	1.79312e-31
Tnrc6b	9.35718e-36	-0.3657	0.657	0.802	1.99926e-31
Sumo1	1.00426e-35	0.254883	0.943	0.936	2.1457e-31
Rps18	1.06398e-35	0.183084	0.992	0.982	2.2733e-31
Jup	1.46329e-35	-0.990542	0.073	0.161	3.12647e-31
Mob3a	1.50942e-35	-0.714543	0.107	0.213	3.22504e-31
Epb41l1	1.63575e-35	-0.648709	0.153	0.275	3.49494e-31
Gdap1	1.68665e-35	-0.530127	0.324	0.483	3.6037e-31
Gm29502	2.08143e-35	-2.01263	0.016	0.064	4.44718e-31
Bcl2l12	2.18451e-35	-0.673255	0.192	0.323	4.66742e-31
2310010J17Rik	2.23421e-35	-0.859086	0.09	0.187	4.77361e-31
Fam89b	2.64764e-35	0.505149	0.688	0.648	5.65694e-31
Swt1	2.74679e-35	-0.497639	0.449	0.621	5.8688e-31
Tomm6	2.77527e-35	-0.238361	0.894	0.939	5.92965e-31
Tma7	2.9297e-35	-0.209193	0.938	0.954	6.25959e-31
Mast4	4.20371e-35	-1.11457	0.069	0.154	8.98165e-31
Gm49708	4.42885e-35	-1.38454	0.044	0.114	9.46268e-31
S100a13	4.628e-35	-1.32375	0.031	0.093	9.88819e-31
Fuz	4.77007e-35	-0.847515	0.094	0.192	1.01917e-30
Lpin2	4.79696e-35	-0.516467	0.441	0.605	1.02492e-30
Mxi1	4.81473e-35	-0.386796	0.516	0.689	1.02871e-30
Fam181b	5.04308e-35	-0.378251	0.535	0.713	1.0775e-30
P2ry14	5.8293e-35	-1.32426	0.036	0.102	1.24549e-30
Kcnh5	6.50039e-35	-1.58797	0.025	0.081	1.38887e-30
Edf1	6.98e-35	0.248326	0.951	0.937	1.49135e-30
Cntln	7.25964e-35	-0.466772	0.41	0.57	1.5511e-30
Ap2b1	7.36793e-35	-0.461219	0.418	0.594	1.57423e-30
Slc17a7	7.74573e-35	-1.17073	0.039	0.105	1.65495e-30
Hsp90ab1	7.96558e-35	0.108425	0.999	0.998	1.70192e-30
Shfl	9.60336e-35	-1.95193	0.014	0.059	2.05185e-30
Fzd7	1.10572e-34	-0.81186	0.118	0.224	2.36247e-30
Cct7	1.13588e-34	0.244693	0.954	0.948	2.42693e-30
Ypel2	1.19521e-34	-0.924784	0.094	0.19	2.55368e-30
Prpf4b	1.64005e-34	-0.360963	0.794	0.893	3.50414e-30
Pdia5	1.82787e-34	-0.949478	0.067	0.15	3.90543e-30
Scg5	1.85456e-34	-0.352517	0.655	0.815	3.96245e-30
Il12a	2.07887e-34	-1.72563	0.015	0.061	4.44171e-30
Gfer	2.14949e-34	0.669307	0.528	0.454	4.59259e-30
Gna11	2.48917e-34	0.454048	0.719	0.697	5.31836e-30
Eef2kmt	2.50538e-34	-0.797986	0.112	0.217	5.353e-30
Ctsa	2.53065e-34	-0.724928	0.174	0.298	5.40698e-30
Dpysl3	2.75634e-34	1.10269	0.359	0.252	5.88919e-30
Dnm1l	3.15268e-34	-0.441781	0.395	0.568	6.73602e-30
Iars2	3.62578e-34	-0.644919	0.17	0.296	7.74683e-30
Tmsb15b1	3.90079e-34	-0.751448	0.087	0.181	8.33442e-30
5430405H02Rik	4.13055e-34	-0.846329	0.092	0.186	8.82534e-30
Smarcd3	4.37795e-34	1.03109	0.334	0.223	9.35393e-30
Bloc1s5	4.97692e-34	-0.629382	0.146	0.265	1.06337e-29
Cux2	5.6744e-34	-0.891435	0.093	0.189	1.21239e-29
Mcm6	5.82341e-34	-0.471722	0.648	0.754	1.24423e-29
Car4	7.10533e-34	-1.31965	0.016	0.062	1.51812e-29
Tsc22d4	7.16392e-34	-0.538639	0.274	0.421	1.53064e-29
Glo1	7.17327e-34	-0.39659	0.514	0.679	1.53264e-29
H2afy	7.40854e-34	0.189943	0.983	0.978	1.58291e-29
Sesn2	7.56111e-34	2.83764	0.098	0.02	1.61551e-29
Sod2	1.04794e-33	0.52556	0.654	0.611	2.23904e-29
Tspan18	1.08355e-33	-0.678861	0.11	0.212	2.31512e-29
Fabp7	1.2042e-33	1.93942	0.145	0.053	2.5729e-29
Plk3	1.25203e-33	1.31755	0.225	0.119	2.67509e-29
Trir	1.43277e-33	0.264845	0.915	0.906	3.06126e-29
Kras	1.53829e-33	0.340456	0.856	0.845	3.2867e-29
Rnf220	1.63471e-33	-0.473615	0.416	0.579	3.49271e-29
Rprm	1.79254e-33	-0.899927	0.09	0.183	3.82993e-29
Ccpg1	1.88228e-33	-0.599112	0.224	0.366	4.02169e-29
Plekho2	2.08325e-33	-0.617788	0.16	0.28	4.45107e-29
Rbms3	2.16254e-33	-0.995078	0.078	0.165	4.62049e-29
Mrfap1	2.27007e-33	0.192047	0.981	0.973	4.85024e-29
Abcb1b	2.44667e-33	-1.82526	0.017	0.065	5.22756e-29
Cks1b	2.4857e-33	0.317694	0.894	0.872	5.31094e-29
Upp2	2.81334e-33	-1.03445	0.048	0.119	6.01099e-29
Hist1h2bm	2.97684e-33	-0.724681	0.263	0.395	6.36032e-29
Rpl8	3.02816e-33	0.142008	0.995	0.995	6.46997e-29
Zc3hav1	3.11078e-33	-1.02955	0.057	0.133	6.64648e-29
Zdhhc1	3.46692e-33	-0.733074	0.125	0.232	7.40742e-29
Lrig1	3.59931e-33	-1.1168	0.042	0.11	7.69028e-29
Zcchc18	3.6684e-33	-0.520255	0.285	0.437	7.83791e-29
Psmb5	3.94838e-33	0.258278	0.935	0.934	8.43611e-29
Kcnb2	4.34133e-33	-0.667516	0.158	0.278	9.27569e-29
Bves	4.45827e-33	-1.03939	0.079	0.166	9.52555e-29
Fam162a	5.51074e-33	-0.321878	0.713	0.844	1.17742e-28
Sphkap	6.55238e-33	-0.534237	0.196	0.329	1.39998e-28
Mindy1	6.75291e-33	-0.657542	0.146	0.262	1.44283e-28
Fbxo32	6.79381e-33	-0.819006	0.116	0.216	1.45157e-28
Id1	6.92882e-33	0.990018	0.3	0.188	1.48041e-28
Atp5j	6.95914e-33	-0.152734	0.978	0.976	1.48689e-28
Pclaf	7.77203e-33	0.326004	0.874	0.784	1.66057e-28
Pcmtd2	7.95064e-33	-0.585752	0.24	0.379	1.69873e-28
Cggbp1	8.52643e-33	-0.345181	0.678	0.803	1.82176e-28
Slc7a3	8.93915e-33	4.04298	0.072	0.007	1.90994e-28
Grin2c	1.12746e-32	-1.40232	0.02	0.07	2.40893e-28
Arap2	1.1516e-32	-1.35751	0.031	0.09	2.4605e-28
Psmc4	1.26154e-32	0.328718	0.862	0.846	2.69541e-28
Igsf9b	1.31849e-32	-1.01621	0.07	0.153	2.81708e-28
Gm4258	1.40779e-32	-0.470007	0.366	0.534	3.00787e-28
Ttc8	1.67351e-32	-0.627027	0.178	0.301	3.57562e-28
Wdr70	1.71689e-32	-0.481043	0.374	0.533	3.6683e-28
Gnai2	1.85346e-32	0.41487	0.875	0.874	3.96011e-28
Tomm20	2.07019e-32	0.215283	0.966	0.958	4.42316e-28
Ubb	2.16864e-32	-0.226549	0.995	0.992	4.63351e-28
Sema6d	2.28804e-32	1.40504	0.183	0.085	4.88862e-28
Gria4	2.37389e-32	-0.595701	0.232	0.37	5.07205e-28
Hes6	2.49757e-32	0.548825	0.709	0.699	5.33631e-28
St6galnac2	2.83611e-32	-1.7821	0.018	0.065	6.05963e-28
Sall1	2.97579e-32	-0.757693	0.106	0.204	6.35808e-28
St18	2.9947e-32	0.877755	0.406	0.303	6.39848e-28
Rsl1d1	3.01808e-32	0.309481	0.865	0.877	6.44843e-28
Pck2	3.0993e-32	1.22552	0.264	0.16	6.62195e-28
Ywhaq	3.10308e-32	0.249144	0.957	0.947	6.63004e-28
Ssb	3.21325e-32	0.234918	0.957	0.947	6.86544e-28
Ttc5	3.44418e-32	-0.391503	0.473	0.646	7.35884e-28
Atp5g2	3.54838e-32	0.173902	0.984	0.977	7.58148e-28
Hist1h2ad	3.78792e-32	-1.01348	0.041	0.106	8.09327e-28
4930500L23Rik	4.4149e-32	-1.62537	0.017	0.063	9.43287e-28
Hadh	4.43618e-32	-0.510704	0.303	0.449	9.47833e-28
Rsrp1	5.45287e-32	-0.242952	0.88	0.945	1.16506e-27
Rexo2	5.62653e-32	-0.322076	0.663	0.799	1.20216e-27
Prelid2	5.84824e-32	-1.23941	0.036	0.098	1.24953e-27
Adgrv1	5.92191e-32	-1.28796	0.052	0.123	1.26527e-27
Gm10561	6.05501e-32	-1.81502	0.016	0.061	1.29371e-27
Ndufb10	6.95709e-32	0.291434	0.909	0.9	1.48645e-27
Gm11837	7.06855e-32	-0.561768	0.193	0.322	1.51027e-27
Rpl15	7.43193e-32	0.121042	0.995	0.993	1.58791e-27
Ssr3	7.62225e-32	-0.315816	0.735	0.859	1.62857e-27
Ppp2r2c	7.89793e-32	-0.271003	0.833	0.915	1.68747e-27
Pitpnm2	8.69875e-32	-0.591512	0.167	0.288	1.85857e-27
Snrpb	9.85233e-32	0.199129	0.972	0.965	2.10505e-27
Rtn1	1.03483e-31	0.457894	0.971	0.974	2.21102e-27
Mllt11	1.07278e-31	0.758619	0.526	0.456	2.29209e-27
Efcab14	1.16598e-31	-0.53347	0.263	0.408	2.49122e-27
Tpm4	1.22408e-31	0.310123	0.881	0.862	2.61536e-27
Fstl1	1.2688e-31	-0.530242	0.264	0.406	2.71092e-27
Pabpc1	1.28904e-31	-0.212093	0.943	0.96	2.75415e-27
Phactr4	1.35548e-31	-0.56906	0.292	0.436	2.89612e-27
Gabra6	1.38316e-31	-1.54067	0.036	0.096	2.95525e-27
Hras	1.55782e-31	0.427556	0.748	0.735	3.32845e-27
Carhsp1	1.73984e-31	0.44766	0.729	0.683	3.71734e-27
Poglut3	1.7665e-31	-0.933557	0.06	0.136	3.7743e-27
Bend6	1.90344e-31	-1.09863	0.042	0.107	4.0669e-27
Usp1	2.19542e-31	0.372081	0.813	0.786	4.69074e-27
Fam32a	2.23313e-31	-0.345822	0.575	0.754	4.77131e-27
Eny2	2.56078e-31	0.28369	0.9	0.901	5.47136e-27
Cntn2	2.60411e-31	0.783001	0.525	0.432	5.56393e-27
Rnf208	2.96086e-31	-0.732194	0.103	0.199	6.32617e-27
Rpgrip1l	3.30266e-31	-0.676163	0.148	0.26	7.05646e-27
Ccdc171	3.371e-31	-1.00401	0.046	0.112	7.20247e-27
Ufc1	4.01228e-31	0.39885	0.765	0.754	8.57263e-27
Pin1	4.31949e-31	0.345236	0.826	0.831	9.22903e-27
Brd9	4.39688e-31	-0.403977	0.542	0.696	9.39436e-27
Herpud1	4.47985e-31	0.857057	0.52	0.457	9.57165e-27
Wscd1	4.84996e-31	0.838269	0.401	0.312	1.03624e-26
Csrp1	4.96769e-31	0.655827	0.61	0.549	1.0614e-26
Cep162	5.19429e-31	-0.67455	0.21	0.338	1.10981e-26
Ube2n	5.23437e-31	0.273376	0.911	0.901	1.11838e-26
Shcbp1	6.32103e-31	0.62032	0.515	0.423	1.35055e-26
Arhgap31	6.36298e-31	-0.626979	0.219	0.35	1.35952e-26
Ddrgk1	6.70714e-31	0.547696	0.573	0.513	1.43305e-26
Atp6v0c	6.86058e-31	0.301598	0.922	0.923	1.46583e-26
Rbl2	7.28087e-31	-0.587525	0.16	0.274	1.55563e-26
Rpl12	7.3579e-31	0.23465	0.977	0.968	1.57209e-26
Ift140	7.76272e-31	-0.682806	0.112	0.212	1.65858e-26
Gm42067	8.00123e-31	-1.02594	0.064	0.141	1.70954e-26
Ifngr1	8.51656e-31	-0.675741	0.12	0.223	1.81965e-26
Armc10	8.67406e-31	-0.533549	0.224	0.359	1.8533e-26
Sclt1	8.79179e-31	-0.474144	0.404	0.561	1.87845e-26
Psmc2	9.4325e-31	0.360686	0.805	0.799	2.01535e-26
Hnrnpl	1.06418e-30	-0.247546	0.858	0.923	2.27372e-26
Psmc5	1.09283e-30	0.31	0.895	0.892	2.33495e-26
H2afy2	1.10257e-30	0.405917	0.791	0.781	2.35574e-26
Pgp	1.19242e-30	0.437389	0.723	0.688	2.54773e-26
Lamtor3	1.25311e-30	-0.402123	0.427	0.598	2.6774e-26
Dync2li1	1.31993e-30	-0.582999	0.18	0.303	2.82016e-26
Wdr27	1.33222e-30	-1.58339	0.016	0.059	2.84642e-26
Grid2ip	1.38671e-30	-0.769596	0.075	0.158	2.96286e-26
Ddx18	1.46651e-30	-0.389957	0.515	0.681	3.13334e-26
Fgf5	1.63745e-30	3.10908	0.081	0.014	3.49857e-26
Ncs1	1.74033e-30	1.09808	0.254	0.15	3.7184e-26
Ift80	1.94358e-30	-0.574149	0.225	0.357	4.15265e-26
Asphd2	1.97431e-30	0.719589	0.483	0.409	4.21832e-26
Paxbp1	2.02387e-30	-0.415716	0.439	0.599	4.3242e-26
Wwp1	2.03918e-30	-0.635826	0.188	0.313	4.35691e-26
Hist2h3b	2.04317e-30	-0.835158	0.075	0.158	4.36543e-26
Rnf125	2.60899e-30	-1.39397	0.018	0.063	5.57437e-26
Asrgl1	2.61556e-30	-0.4365	0.298	0.452	5.58841e-26
Mbnl2	2.62182e-30	-0.410386	0.386	0.546	5.60179e-26
Map1b	2.66099e-30	0.464232	0.908	0.902	5.68546e-26
Hnrnpd	2.74718e-30	0.215155	0.979	0.971	5.86963e-26
Bcl11b	2.75238e-30	1.77111	0.147	0.059	5.88074e-26
2810004N23Rik	2.93957e-30	-0.401014	0.52	0.681	6.28069e-26
Ebf1	3.2617e-30	-0.268583	0.861	0.944	6.96895e-26
Hist1h4a	3.43412e-30	-0.886184	0.074	0.156	7.33733e-26
Ust	3.73607e-30	-0.947397	0.067	0.144	7.98248e-26
Eif1ad	4.41414e-30	0.582494	0.568	0.51	9.43126e-26
Nsg1	5.09861e-30	0.43373	0.792	0.785	1.08937e-25
8430419K02Rik	7.05249e-30	-1.28534	0.038	0.098	1.50684e-25
Snrpa1	7.72227e-30	0.330156	0.882	0.864	1.64994e-25
Slc2a4	7.77082e-30	-0.650247	0.1	0.194	1.66031e-25
Epha8	8.28671e-30	2.9196	0.092	0.021	1.77054e-25
Aatk	8.65314e-30	-1.03939	0.04	0.101	1.84883e-25
Eln	9.34447e-30	-0.74721	0.222	0.339	1.99654e-25
Glrx3	9.5099e-30	0.251057	0.925	0.93	2.03189e-25
Ephb4	1.18274e-29	-1.22836	0.036	0.094	2.52705e-25
Pomp	1.23052e-29	0.255466	0.914	0.91	2.62913e-25
Stmn2	1.35006e-29	0.581836	0.792	0.713	2.88454e-25
4631405J19Rik	1.52636e-29	1.1836	0.272	0.171	3.26123e-25
Gm42047	1.6856e-29	-1.08493	0.304	0.395	3.60144e-25
Dnajc9	1.99709e-29	0.307928	0.893	0.863	4.26697e-25
Nav1	2.11117e-29	0.329654	0.892	0.899	4.51073e-25
Soga1	2.20272e-29	-0.468282	0.264	0.409	4.70634e-25
Igf2bp1	2.22774e-29	4.63701	0.059	0.003	4.7598e-25
Pms1	2.32338e-29	-0.654582	0.156	0.267	4.96414e-25
Ino80d	2.42019e-29	-0.510945	0.299	0.448	5.17098e-25
Sp3os	2.46783e-29	-0.574019	0.16	0.273	5.27277e-25
Psmb6	2.69822e-29	0.214855	0.964	0.958	5.76503e-25
Parp4	3.01617e-29	-1.65738	0.019	0.064	6.44435e-25
Utrn	3.03643e-29	-0.656453	0.117	0.216	6.48764e-25
Gm16105	3.18671e-29	-1.45533	0.017	0.06	6.80872e-25
Rpl9	3.25269e-29	0.123502	0.994	0.988	6.9497e-25
Tubb3	3.41348e-29	0.483713	0.879	0.848	7.29324e-25
Ahdc1	4.48069e-29	-0.486796	0.319	0.465	9.57345e-25
6720427I07Rik	4.69071e-29	-0.7204	0.116	0.212	1.00222e-24
Kbtbd11	4.94722e-29	-0.483623	0.278	0.421	1.05702e-24
Zfp354c	5.04271e-29	-0.480578	0.255	0.395	1.07742e-24
Abhd4	5.10285e-29	-1.18027	0.036	0.094	1.09028e-24
Pex3	5.13313e-29	-0.514612	0.177	0.295	1.09674e-24
Psmd13	5.63345e-29	0.323768	0.829	0.823	1.20364e-24
Tsacc	5.94991e-29	-1.12233	0.04	0.1	1.27126e-24
Cnpy1	6.38673e-29	-0.651892	0.203	0.326	1.36459e-24
Gm44777	6.44229e-29	-0.867847	0.06	0.133	1.37646e-24
Gas1	6.58096e-29	-0.38911	0.397	0.551	1.40609e-24
Gpr50	6.71512e-29	-1.08103	0.05	0.115	1.43475e-24
Magi2	7.25846e-29	-0.511129	0.276	0.417	1.55084e-24
Gm30541	7.58701e-29	-1.13571	0.038	0.096	1.62104e-24
1110065P20Rik	7.65725e-29	-0.485029	0.314	0.461	1.63605e-24
Wdr60	7.80658e-29	-0.763562	0.138	0.24	1.66795e-24
Jdp2	7.89085e-29	1.76648	0.135	0.052	1.68596e-24
Mnat1	9.79291e-29	-0.456426	0.222	0.356	2.09235e-24
Ptgds	1.09564e-28	-1.64214	0.015	0.055	2.34095e-24
Zfp395	1.09566e-28	-0.77881	0.091	0.178	2.34098e-24
Birc5	1.24012e-28	0.375312	0.748	0.646	2.64963e-24
Pax3	1.25011e-28	-1.28639	0.04	0.099	2.67098e-24
Mrpl53	1.25703e-28	0.299821	0.864	0.86	2.68578e-24
Git2	1.40885e-28	-0.449469	0.479	0.631	3.01015e-24
Foxa2	1.42585e-28	-0.432667	0.164	0.279	3.04648e-24
Cfap77	1.53225e-28	-1.24371	0.03	0.083	3.27381e-24
Cog5	1.55307e-28	-0.580455	0.164	0.277	3.3183e-24
Vsx2	1.57187e-28	1.11323	0.257	0.155	3.35846e-24
Tspan12	1.57503e-28	-0.698653	0.151	0.258	3.3652e-24
Eif3f	1.59282e-28	0.229263	0.951	0.949	3.40323e-24
Eef2	1.5994e-28	0.165869	0.983	0.976	3.41727e-24
Uqcrq	1.70749e-28	0.229952	0.951	0.94	3.64822e-24
Hes5	1.79274e-28	4.84077	0.063	0.006	3.83036e-24
Dennd6a	1.79369e-28	-0.615653	0.201	0.323	3.8324e-24
Wls	1.79702e-28	-0.832627	0.099	0.186	3.8395e-24
Zfp651	1.86968e-28	-0.615248	0.146	0.252	3.99477e-24
Hexa	1.89041e-28	-0.615079	0.146	0.252	4.03905e-24
Slc1a3	1.97066e-28	-0.484964	0.382	0.531	4.21051e-24
Ermp1	2.02803e-28	-0.833257	0.094	0.18	4.33308e-24
Evc	2.07042e-28	-0.92569	0.071	0.147	4.42366e-24
Sp4	2.31726e-28	-0.492517	0.214	0.344	4.95106e-24
Nfe2l1	2.58932e-28	-0.455525	0.355	0.509	5.53233e-24
Abracl	2.82656e-28	0.293624	0.908	0.918	6.03923e-24
Dnajc10	2.88505e-28	-0.449802	0.383	0.539	6.1642e-24
Dlgap3	3.06131e-28	0.668567	0.45	0.371	6.5408e-24
Limd2	3.21757e-28	0.594117	0.553	0.492	6.87465e-24
Casp7	3.24172e-28	-0.742062	0.092	0.179	6.92625e-24
Cars	3.43554e-28	0.938622	0.324	0.231	7.34038e-24
Clstn1	4.21484e-28	-0.400133	0.458	0.619	9.00544e-24
Msl3	4.32541e-28	-0.448155	0.346	0.498	9.24166e-24
Mcee	4.32543e-28	-0.463558	0.261	0.398	9.24172e-24
Camk2b	4.53242e-28	-0.71314	0.103	0.192	9.68397e-24
Tob2	4.5808e-28	-0.482056	0.339	0.481	9.78733e-24
Elavl3	4.74759e-28	0.423489	0.837	0.825	1.01437e-23
Ppp1r1a	4.75322e-28	-0.476973	0.189	0.309	1.01557e-23
Mt3	5.04659e-28	-1.03927	0.037	0.095	1.07825e-23
B230312C02Rik	5.13976e-28	-1.43823	0.032	0.086	1.09816e-23
Nudcd2	5.66e-28	0.348409	0.785	0.749	1.20932e-23
Ndufa7	6.98338e-28	-0.213909	0.89	0.924	1.49207e-23
Isl1	7.23449e-28	7.38778	0.05	0	1.54572e-23
Sept9	7.28103e-28	0.801558	0.351	0.255	1.55567e-23
Akr1a1	7.56396e-28	0.292764	0.862	0.869	1.61612e-23
Gpbp1l1	8.00705e-28	-0.434782	0.308	0.458	1.71079e-23
Slitrk1	8.14688e-28	-1.00916	0.051	0.116	1.74066e-23
Dnajb4	8.47743e-28	-0.53787	0.219	0.343	1.81129e-23
Spice1	8.60186e-28	-0.696395	0.12	0.216	1.83787e-23
Oxsm	8.63968e-28	-1.44608	0.02	0.063	1.84595e-23
2310009A05Rik	8.79732e-28	-0.401038	0.331	0.488	1.87964e-23
Dalrd3	8.90571e-28	-0.499287	0.22	0.35	1.90279e-23
Tmem179b	9.29076e-28	-0.802926	0.106	0.196	1.98506e-23
Prcp	9.30024e-28	-0.644274	0.149	0.254	1.98709e-23
Mrpl28	9.37126e-28	0.310845	0.84	0.841	2.00226e-23
Atf5	1.06129e-27	0.942841	0.382	0.297	2.26754e-23
mt-Nd6	1.08045e-27	-0.599899	0.17	0.283	2.30849e-23
Pdia3	1.11243e-27	-0.259583	0.816	0.904	2.37682e-23
Oxr1	1.41047e-27	-0.501952	0.246	0.377	3.0136e-23
Pex6	1.55565e-27	-0.561275	0.15	0.259	3.32381e-23
Peg10	1.61946e-27	-0.885234	0.069	0.144	3.46013e-23
Pafah1b2	1.74107e-27	0.382351	0.758	0.741	3.71998e-23
Gabra1	1.81272e-27	-1.54335	0.016	0.056	3.87306e-23
Sh3glb1	1.88741e-27	0.274218	0.886	0.886	4.03265e-23
Ina	2.05162e-27	0.533268	0.687	0.655	4.38348e-23
Nr3c2	2.44012e-27	-0.844117	0.069	0.143	5.21356e-23
Tbrg1	2.47442e-27	-0.330779	0.551	0.706	5.28685e-23
Ogfrl1	2.55045e-27	-0.452205	0.287	0.428	5.44929e-23
Pitx3	2.61635e-27	2.53013	0.08	0.017	5.59009e-23
Zfp62	2.78074e-27	-0.409489	0.344	0.495	5.94132e-23
Mrto4	2.83604e-27	0.36387	0.797	0.799	6.05949e-23
Pts	2.89778e-27	-0.487294	0.305	0.446	6.1914e-23
Ncan	3.06923e-27	1.38024	0.151	0.066	6.55771e-23
M6pr	3.1297e-27	-0.445054	0.247	0.383	6.68691e-23
Axin2	3.21562e-27	-0.819789	0.081	0.159	6.87049e-23
Irf2	3.48944e-27	-0.525602	0.216	0.338	7.45555e-23
Mr1	3.52055e-27	-1.27385	0.056	0.122	7.52201e-23
2610316D01Rik	3.5283e-27	-0.860273	0.058	0.126	7.53856e-23
Nkd1	3.71199e-27	0.434065	0.654	0.602	7.93104e-23
Hist1h2an	3.76008e-27	-0.823749	0.046	0.109	8.0338e-23
Ppm1k	3.77927e-27	-0.749013	0.09	0.174	8.0748e-23
Eef2k	3.82435e-27	-0.613561	0.138	0.24	8.17111e-23
Tmem159	4.03009e-27	-0.498832	0.14	0.245	8.61068e-23
Notch2	4.27763e-27	-0.696701	0.102	0.19	9.13959e-23
Psmb4	4.29652e-27	0.259597	0.921	0.911	9.17993e-23
Dcx	5.0047e-27	0.486459	0.692	0.657	1.0693e-22
B230219D22Rik	5.30006e-27	-0.279981	0.737	0.848	1.13241e-22
Efhd2	5.76861e-27	1.12866	0.284	0.19	1.23252e-22
Tasor	6.60636e-27	-0.430583	0.316	0.46	1.41152e-22
1700029J07Rik	6.93441e-27	-1.10492	0.04	0.098	1.48161e-22
Timm8a1	6.95271e-27	0.486955	0.668	0.658	1.48552e-22
Zfp87	8.29638e-27	-0.547671	0.118	0.213	1.7726e-22
Srp54a	8.52632e-27	-0.622653	0.14	0.242	1.82173e-22
Itch	8.87273e-27	-0.397625	0.439	0.601	1.89575e-22
Rnf112	9.19431e-27	-1.2582	0.029	0.079	1.96446e-22
Ahsa2	9.41861e-27	0.444408	0.655	0.63	2.01238e-22
Zmynd8	9.42843e-27	-0.454563	0.448	0.596	2.01448e-22
Snhg12	9.45271e-27	-0.39947	0.465	0.62	2.01967e-22
Coro1c	1.01753e-26	0.6351	0.517	0.468	2.17406e-22
Eif3a	1.14165e-26	0.223677	0.946	0.953	2.43925e-22
Rnf7	1.2103e-26	0.296826	0.85	0.858	2.58592e-22
Akt3	1.22151e-26	-0.425885	0.296	0.44	2.60987e-22
Dnajb14	1.30115e-26	-0.544969	0.28	0.409	2.78004e-22
Scd2	1.30288e-26	-0.360219	0.583	0.717	2.78373e-22
Gm43305	1.31059e-26	2.13603	0.089	0.024	2.80021e-22
Prpf40a	1.35289e-26	0.266203	0.897	0.892	2.89059e-22
1190007I07Rik	1.48287e-26	-0.443747	0.256	0.39	3.16831e-22
Dpy19l1	1.51562e-26	-0.488631	0.24	0.368	3.23828e-22
Cbll1	1.52364e-26	-0.397787	0.334	0.486	3.25541e-22
Lrrcc1	1.68494e-26	-0.462574	0.274	0.409	3.60005e-22
Sept3	1.77748e-26	0.462369	0.717	0.684	3.79777e-22
Fez1	1.84879e-26	0.310447	0.883	0.89	3.95013e-22
Ivd	1.95805e-26	-0.477133	0.197	0.317	4.18357e-22
Lamp2	1.99593e-26	-0.396657	0.367	0.516	4.2645e-22
Ppp1r2	2.1374e-26	0.418839	0.694	0.654	4.56677e-22
D130017N08Rik	2.57933e-26	-1.71007	0.014	0.051	5.511e-22
Sh3kbp1	2.79084e-26	0.793248	0.387	0.304	5.9629e-22
Il17ra	2.83865e-26	-0.834876	0.068	0.14	6.06507e-22
Maged2	2.86492e-26	-0.36809	0.372	0.521	6.12118e-22
Rpl13	3.08039e-26	0.116092	0.997	0.994	6.58156e-22
Mapre1	3.16875e-26	0.27562	0.902	0.887	6.77034e-22
Tex9	3.18912e-26	-0.44905	0.283	0.42	6.81387e-22
Prpf6	3.47816e-26	-0.413004	0.38	0.532	7.43144e-22
Kifap3	3.64274e-26	-0.352118	0.491	0.645	7.78308e-22
Dlgap1	3.84696e-26	-0.571742	0.243	0.364	8.21942e-22
Exoc6b	3.96044e-26	-0.583838	0.171	0.283	8.46187e-22
Ift122	4.02039e-26	-0.553001	0.186	0.297	8.58997e-22
Eif3h	4.02815e-26	0.194259	0.952	0.951	8.60655e-22
Mrpl18	4.07814e-26	0.286335	0.887	0.878	8.71335e-22
Letm2	4.37259e-26	-0.883871	0.102	0.186	9.34247e-22
2010204K13Rik	4.41831e-26	-0.654016	0.093	0.176	9.44016e-22
Phkb	4.45547e-26	-0.672032	0.124	0.219	9.51955e-22
Nasp	4.55839e-26	0.181931	0.979	0.973	9.73946e-22
Sesn3	4.77666e-26	-0.409568	0.298	0.437	1.02058e-21
Enpp4	5.12731e-26	-1.06489	0.045	0.105	1.0955e-21
Atp1a2	5.54264e-26	-1.54651	0.018	0.059	1.18424e-21
Siva1	5.81918e-26	-0.287942	0.834	0.895	1.24333e-21
Aga	5.84602e-26	-0.941567	0.058	0.125	1.24906e-21
Mapk12	5.84959e-26	-1.63446	0.017	0.057	1.24982e-21
Psma4	5.94099e-26	0.230777	0.944	0.934	1.26935e-21
Lockd	6.09583e-26	-0.479809	0.567	0.669	1.30244e-21
B930036N10Rik	6.29573e-26	-0.652279	0.133	0.229	1.34515e-21
Ppfibp1	7.1268e-26	-0.663912	0.104	0.192	1.52271e-21
Bend7	7.13134e-26	-0.70538	0.108	0.196	1.52368e-21
Abcd3	7.13479e-26	-0.453665	0.222	0.346	1.52442e-21
Nr3c1	7.44031e-26	-0.470593	0.258	0.387	1.5897e-21
2700038G22Rik	7.53561e-26	-0.757504	0.089	0.17	1.61006e-21
Mpc1	8.42905e-26	0.292412	0.875	0.876	1.80095e-21
Selenom	8.55469e-26	-0.396497	0.454	0.61	1.8278e-21
Cyb5a	8.95945e-26	-0.334073	0.545	0.699	1.91428e-21
Slc20a2	9.37926e-26	-0.603031	0.141	0.241	2.00397e-21
Exosc4	9.53861e-26	0.473556	0.616	0.571	2.03802e-21
Adat1	9.8422e-26	-0.807697	0.078	0.154	2.10288e-21
Slc16a6	1.07208e-25	-0.647154	0.127	0.223	2.2906e-21
Zfp799	1.07314e-25	-0.646584	0.105	0.191	2.29286e-21
Nhp2	1.12078e-25	0.337205	0.858	0.864	2.39466e-21
Usp50	1.15254e-25	-0.885956	0.067	0.138	2.46251e-21
Cog7	1.26342e-25	0.243195	0.948	0.959	2.69942e-21
Ccdc77	1.35009e-25	-0.571352	0.236	0.356	2.8846e-21
Chgb	1.37787e-25	-0.518255	0.288	0.418	2.94396e-21
Lztfl1	1.45993e-25	-0.401024	0.372	0.529	3.11929e-21
Gstm1	1.46245e-25	-0.680716	0.103	0.188	3.12468e-21
Tpd52	1.56157e-25	-0.620353	0.128	0.222	3.33646e-21
Ppp2ca	1.57327e-25	0.240396	0.922	0.911	3.36145e-21
Cebpz	1.58771e-25	-0.338358	0.57	0.713	3.39229e-21
Calr	1.69955e-25	0.33771	0.871	0.872	3.63126e-21
2610020C07Rik	1.74227e-25	-0.710154	0.106	0.193	3.72254e-21
Rc3h1	1.87978e-25	-0.392295	0.273	0.408	4.01633e-21
Peak1	1.89594e-25	-0.54287	0.205	0.322	4.05087e-21
Zeb1	1.98412e-25	-0.30549	0.794	0.888	4.23926e-21
Vgll4	2.11063e-25	-0.39565	0.386	0.54	4.50957e-21
Ubtf	2.43393e-25	0.309694	0.85	0.84	5.20034e-21
Mpp7	2.47298e-25	-0.481806	0.264	0.395	5.28377e-21
Rgs20	2.66192e-25	-0.493379	0.19	0.304	5.68746e-21
C1ql3	2.7239e-25	-0.613286	0.14	0.235	5.81988e-21
Ppp1ca	2.73445e-25	0.239568	0.915	0.926	5.84243e-21
Polr2k	2.78235e-25	-0.269361	0.718	0.82	5.94476e-21
Tet2	2.85776e-25	-0.523829	0.208	0.327	6.1059e-21
Neurod2	2.99631e-25	1.25496	0.174	0.089	6.40192e-21
Nfe2l2	3.52168e-25	-0.392639	0.246	0.378	7.52443e-21
Nxph4	3.52267e-25	1.40017	0.157	0.075	7.52653e-21
5330434G04Rik	4.2443e-25	-0.755884	0.123	0.214	9.06837e-21
Bbs9	4.40177e-25	-1.0228	0.041	0.098	9.40483e-21
Mthfs	4.51625e-25	-0.946793	0.053	0.115	9.64943e-21
Ppp1cc	4.64731e-25	0.270201	0.877	0.883	9.92944e-21
Caprin1	4.82571e-25	0.250982	0.914	0.923	1.03106e-20
Dera	4.97778e-25	-0.399225	0.249	0.381	1.06355e-20
Atg16l2	5.09179e-25	-1.06993	0.045	0.104	1.08791e-20
Txnl4a	5.20103e-25	0.317235	0.827	0.839	1.11125e-20
Ap2a2	5.20813e-25	-0.403591	0.363	0.507	1.11277e-20
Lyrm4	5.21509e-25	-0.617285	0.13	0.223	1.11426e-20
Stx16	5.31255e-25	-0.375366	0.599	0.751	1.13508e-20
Vps13b	5.75585e-25	-0.726758	0.118	0.208	1.22979e-20
Ttc23	6.13969e-25	-0.949532	0.055	0.119	1.31181e-20
Mrln	6.51155e-25	-0.625518	0.099	0.183	1.39126e-20
Rnf167	6.51223e-25	-0.457222	0.202	0.321	1.3914e-20
Stk11	6.53756e-25	-0.327353	0.592	0.737	1.39682e-20
Ccdc167	6.60483e-25	-0.408467	0.248	0.379	1.41119e-20
Hibadh	6.62661e-25	-0.414526	0.24	0.372	1.41584e-20
Lgals8	6.77683e-25	-0.861911	0.055	0.119	1.44794e-20
Tars	7.03261e-25	0.612733	0.54	0.499	1.50259e-20
4833420G17Rik	7.72093e-25	-0.374201	0.524	0.673	1.64965e-20
Zfhx4	8.04386e-25	-0.97437	0.058	0.122	1.71865e-20
Tle4	8.5663e-25	-0.488795	0.35	0.495	1.83028e-20
Rnpep	8.97731e-25	-0.485336	0.134	0.231	1.91809e-20
Mrpl12	8.99018e-25	0.34659	0.798	0.806	1.92084e-20
AW549877	9.66139e-25	-0.521013	0.208	0.325	2.06425e-20
Trhde	9.81856e-25	-0.929332	0.049	0.108	2.09783e-20
Usp11	9.88458e-25	-0.482437	0.22	0.338	2.11194e-20
Il1rap	1.00389e-24	-1.13685	0.03	0.079	2.14491e-20
Trub1	1.06976e-24	-0.720767	0.109	0.195	2.28566e-20
Nrn1	1.20177e-24	-0.324831	0.39	0.539	2.56771e-20
Abcg2	1.3049e-24	-0.585265	0.111	0.199	2.78804e-20
Phtf1	1.32986e-24	-0.46192	0.19	0.301	2.84139e-20
Hist2h2be	1.37186e-24	-1.25556	0.028	0.075	2.93112e-20
Selenof	1.41121e-24	0.182989	0.97	0.97	3.01519e-20
Otx2	1.48921e-24	-0.482955	0.406	0.53	3.18184e-20
Apobec1	1.49242e-24	-0.838875	0.081	0.155	3.1887e-20
Tmsb15b2	1.53731e-24	-0.411166	0.179	0.292	3.28461e-20
Frmd4b	1.6962e-24	0.423892	0.631	0.575	3.6241e-20
Hes1	1.71145e-24	0.944193	0.278	0.181	3.65669e-20
Mgarp	1.78605e-24	2.02096	0.101	0.034	3.81608e-20
Rtn4r	1.96359e-24	-0.570028	0.178	0.284	4.1954e-20
Fn1	1.98647e-24	-0.816262	0.094	0.174	4.24429e-20
Mxd3	1.98815e-24	0.456634	0.61	0.526	4.24788e-20
Ptprk	2.06672e-24	-0.406066	0.218	0.339	4.41576e-20
Acadm	2.0918e-24	-0.487239	0.203	0.319	4.46935e-20
Ctdsp2	2.20726e-24	-0.438237	0.252	0.38	4.71603e-20
Cxcr4	2.38439e-24	-0.488963	0.228	0.345	5.09449e-20
Tmem181a	2.39317e-24	-0.53992	0.174	0.281	5.11325e-20
Alcam	2.41452e-24	-0.370583	0.407	0.554	5.15887e-20
Hpcal1	2.49064e-24	1.30842	0.177	0.095	5.3215e-20
Slc2a13	2.522e-24	-0.980241	0.044	0.101	5.3885e-20
Egfem1	2.56566e-24	-0.931908	0.037	0.09	5.4818e-20
Efcab7	2.60965e-24	-0.642575	0.085	0.161	5.57577e-20
Slc7a14	2.87902e-24	-0.951066	0.041	0.097	6.15131e-20
Eya4	2.95328e-24	-0.68301	0.122	0.213	6.30998e-20
D430041D05Rik	3.01042e-24	-0.279521	0.794	0.884	6.43205e-20
Ube2s	3.28742e-24	0.234048	0.968	0.951	7.02391e-20
1500004A13Rik	3.28925e-24	-0.41875	0.338	0.479	7.02782e-20
Pag1	3.37442e-24	1.14773	0.199	0.115	7.20978e-20
Gm47320	3.52153e-24	-0.921109	0.082	0.156	7.5241e-20
Cst3	3.60615e-24	-0.270557	0.769	0.859	7.7049e-20
Hist1h3a	3.66426e-24	-0.563216	0.162	0.264	7.82906e-20
Slc5a3	3.71429e-24	-0.679352	0.11	0.194	7.93595e-20
Cdc37	3.79326e-24	-0.234054	0.76	0.864	8.10468e-20
Antxr2	3.81707e-24	-0.689742	0.093	0.171	8.15554e-20
Pfas	5.09775e-24	-0.610553	0.195	0.307	1.08919e-19
Ubc	5.4415e-24	-0.2364	0.933	0.954	1.16263e-19
1500015A07Rik	5.55388e-24	-0.549561	0.164	0.266	1.18664e-19
Tpm3	5.80207e-24	0.316864	0.797	0.791	1.23967e-19
Snapin	5.80422e-24	-0.514209	0.184	0.294	1.24013e-19
Rheb	5.83187e-24	0.267379	0.881	0.891	1.24604e-19
Hist1h2ak	5.85087e-24	-0.748119	0.073	0.144	1.2501e-19
Eif5	6.15423e-24	0.237358	0.94	0.948	1.31491e-19
Ube2e3	6.46371e-24	0.236508	0.936	0.931	1.38104e-19
Cyp39a1	6.49113e-24	-0.533947	0.142	0.238	1.38689e-19
Flrt3	6.60669e-24	-0.467952	0.263	0.389	1.41158e-19
2810013P06Rik	6.63966e-24	-0.464654	0.278	0.407	1.41863e-19
Gab1	7.24015e-24	1.10124	0.261	0.177	1.54693e-19
Fkbp9	8.81227e-24	-0.738869	0.073	0.143	1.88283e-19
Tmed3	8.84865e-24	-0.3842	0.263	0.393	1.8906e-19
Gdpd5	9.24801e-24	1.79449	0.112	0.043	1.97593e-19
Svil	9.78322e-24	-0.643664	0.118	0.206	2.09028e-19
Qsox1	9.82049e-24	0.769706	0.344	0.256	2.09825e-19
Rps7	1.01497e-23	0.12826	0.992	0.984	2.16858e-19
Grn	1.0538e-23	-0.562632	0.121	0.209	2.25155e-19
Slc12a6	1.07762e-23	-0.44372	0.214	0.332	2.30244e-19
Efnb3	1.10467e-23	-0.799239	0.059	0.123	2.36024e-19
Vdac2	1.11561e-23	0.214864	0.938	0.938	2.38361e-19
Mdfic	1.2134e-23	-0.610363	0.076	0.15	2.59255e-19
Anp32e	1.24144e-23	0.239361	0.933	0.928	2.65246e-19
Golgb1	1.24606e-23	-0.315219	0.604	0.749	2.66233e-19
Chst5	1.26672e-23	1.96934	0.086	0.025	2.70647e-19
Dstn	1.28726e-23	-0.185009	0.898	0.93	2.75036e-19
Il1rapl1	1.41986e-23	-1.26575	0.033	0.082	3.03367e-19
Tmem94	1.44629e-23	-0.554497	0.116	0.203	3.09014e-19
Kdm6a	1.48007e-23	-0.363899	0.328	0.467	3.16231e-19
Aasdh	1.51001e-23	-0.781692	0.084	0.157	3.22628e-19
Ttc32	1.61771e-23	-0.479512	0.182	0.29	3.45639e-19
Ctso	1.62318e-23	-0.973879	0.047	0.104	3.46808e-19
Pcmtd1	1.64798e-23	-0.414066	0.318	0.457	3.52108e-19
Gm17322	1.79837e-23	-0.634054	0.08	0.152	3.84241e-19
Clta	1.86085e-23	0.200993	0.952	0.948	3.97589e-19
Slc15a2	1.90351e-23	3.57304	0.054	0.006	4.06703e-19
Barhl2	1.95595e-23	-0.349923	0.422	0.569	4.17908e-19
Creg1	2.04947e-23	-0.646922	0.12	0.207	4.3789e-19
Tmco1	2.07148e-23	-0.315747	0.637	0.768	4.42593e-19
Ltbp4	2.13149e-23	-0.938784	0.066	0.132	4.55414e-19
Rassf4	2.20571e-23	-0.269873	0.706	0.814	4.71272e-19
Atp6v1g2	2.30037e-23	-1.12133	0.04	0.092	4.91497e-19
Ralgps2	2.3143e-23	0.481669	0.644	0.598	4.94473e-19
Ephb1	2.34706e-23	2.0061	0.097	0.033	5.01474e-19
Rnf126	2.36035e-23	0.423466	0.63	0.597	5.04311e-19
Gas2	2.58894e-23	-0.52243	0.139	0.234	5.53154e-19
Aldh7a1	2.83945e-23	-0.491742	0.185	0.293	6.06677e-19
Fam102b	2.88971e-23	-0.577095	0.106	0.188	6.17415e-19
Itpr1	2.91215e-23	-0.681744	0.104	0.186	6.2221e-19
Nppc	3.06798e-23	-0.732392	0.107	0.188	6.55505e-19
Galnt11	3.15541e-23	-0.504469	0.298	0.428	6.74185e-19
Lhx1os	3.26176e-23	-0.334883	0.529	0.67	6.96907e-19
Snrpd2	3.2943e-23	-0.135139	0.966	0.964	7.03861e-19
Tra2b	3.31707e-23	-0.240824	0.865	0.932	7.08724e-19
Hint3	3.38302e-23	-0.504086	0.185	0.293	7.22816e-19
Cflar	3.45054e-23	-0.599103	0.14	0.232	7.37243e-19
Tagln2	3.96642e-23	-0.900595	0.042	0.096	8.47466e-19
Rbm39	4.03143e-23	-0.150023	0.976	0.989	8.61355e-19
Mdk	4.10368e-23	-0.331461	0.77	0.851	8.76793e-19
Fat1	4.10835e-23	-0.491167	0.235	0.354	8.77791e-19
Cast	4.12014e-23	-0.996083	0.039	0.091	8.8031e-19
Adsl	4.13812e-23	-0.442154	0.27	0.398	8.84152e-19
Bri3	4.21026e-23	0.288467	0.833	0.836	8.99563e-19
Psmg2	4.21443e-23	-0.365817	0.469	0.617	9.00455e-19
Exoc2	4.35515e-23	-0.374597	0.34	0.479	9.30522e-19
Rab3a	4.39066e-23	0.751698	0.458	0.394	9.38108e-19
Polr2c	4.46727e-23	0.285262	0.832	0.848	9.54477e-19
Nfatc1	4.78487e-23	-1.55061	0.02	0.059	1.02234e-18
Plcb4	4.81017e-23	-0.327146	0.286	0.42	1.02774e-18
Micu2	5.00384e-23	-0.378564	0.273	0.405	1.06912e-18
Dhx40	5.03946e-23	-0.414238	0.288	0.419	1.07673e-18
Spint2	5.33227e-23	1.45577	0.139	0.066	1.13929e-18
Ccdc85c	5.70322e-23	-0.517439	0.096	0.176	1.21855e-18
Yars	5.89569e-23	0.770226	0.401	0.336	1.25967e-18
Nsg2	6.24128e-23	0.366567	0.739	0.73	1.33351e-18
Bhlhe22	6.25467e-23	0.790079	0.395	0.32	1.33637e-18
Gm5914	6.50496e-23	-0.465842	0.201	0.311	1.38985e-18
Smim19	6.86888e-23	-0.407645	0.286	0.42	1.46761e-18
Arhgef25	6.95763e-23	-0.590523	0.198	0.302	1.48657e-18
Bex4	7.02967e-23	-0.269822	0.671	0.795	1.50196e-18
Nsa2	7.42733e-23	-0.241774	0.847	0.904	1.58692e-18
Hist1h2bp	7.76851e-23	-0.882592	0.061	0.124	1.65982e-18
Tmem175	8.24549e-23	-0.901923	0.051	0.109	1.76173e-18
Rpl30	8.46813e-23	-0.102901	0.994	0.995	1.8093e-18
Sfxn1	8.52525e-23	0.408181	0.647	0.622	1.8215e-18
Mapk1ip1	8.86914e-23	-0.804801	0.093	0.169	1.89498e-18
Traf3ip3	9.02973e-23	2.38023	0.073	0.018	1.92929e-18
Ebpl	9.41455e-23	-0.499188	0.235	0.351	2.01151e-18
4930581F22Rik	1.0046e-22	-0.85138	0.041	0.094	2.14642e-18
Dusp23	1.00703e-22	-0.940935	0.042	0.096	2.15163e-18
Snx22	1.02662e-22	-1.28284	0.035	0.083	2.19348e-18
Strap	1.07907e-22	0.280641	0.829	0.836	2.30554e-18
Rexo5	1.12529e-22	-0.636603	0.112	0.197	2.40428e-18
Zc3h12b	1.14006e-22	-0.876465	0.042	0.096	2.43585e-18
Sgk3	1.1611e-22	-0.604028	0.059	0.122	2.4808e-18
Zbed5	1.17276e-22	-1.27014	0.024	0.066	2.50572e-18
Polk	1.17795e-22	-0.719503	0.072	0.14	2.51681e-18
Tsen2	1.1864e-22	-0.443436	0.223	0.341	2.53486e-18
Kitl	1.22086e-22	-0.344661	0.366	0.502	2.6085e-18
Arhgap42	1.2574e-22	-0.663234	0.118	0.203	2.68657e-18
Crot	1.31681e-22	-0.560289	0.146	0.241	2.81349e-18
Eif5b	1.3455e-22	-0.256161	0.772	0.856	2.87481e-18
Pfn1	1.37906e-22	0.183766	0.965	0.96	2.9465e-18
Ndufb8	1.40533e-22	0.194186	0.961	0.955	3.00262e-18
Cited2	1.445e-22	-0.313914	0.578	0.713	3.08739e-18
Polr3g	1.46821e-22	-0.766094	0.074	0.142	3.13697e-18
Hspa4l	1.49422e-22	-0.398638	0.278	0.401	3.19254e-18
D8Ertd738e	1.56366e-22	0.26975	0.881	0.898	3.34091e-18
Nudt13	1.62951e-22	-0.667637	0.104	0.185	3.48161e-18
Cebpb	1.65982e-22	2.03814	0.084	0.025	3.54637e-18
Ndufa8	1.77208e-22	0.294092	0.829	0.837	3.78622e-18
Gdf10	1.82118e-22	-0.783552	0.1	0.175	3.89113e-18
Sh3bp5	2.15942e-22	-0.534231	0.179	0.281	4.61383e-18
Tef	2.25104e-22	-0.465137	0.205	0.315	4.80958e-18
Slc25a40	2.28929e-22	-0.574063	0.106	0.188	4.8913e-18
Fam210a	2.28946e-22	-0.446169	0.256	0.379	4.89167e-18
Aldh9a1	2.31433e-22	-0.664329	0.083	0.155	4.9448e-18
Nucb1	2.39379e-22	-0.527688	0.142	0.234	5.11457e-18
Plp2	2.40406e-22	-0.42436	0.182	0.289	5.13652e-18
Slc2a3	2.53028e-22	-0.694955	0.085	0.158	5.4062e-18
Sept7	2.53151e-22	0.208586	0.933	0.935	5.40883e-18
Fam171b	2.86918e-22	-0.348413	0.461	0.601	6.13029e-18
Tmem242	2.89503e-22	-0.378805	0.27	0.399	6.18552e-18
Tro	2.90752e-22	-0.372779	0.243	0.363	6.21221e-18
Kdsr	2.94495e-22	-0.470874	0.224	0.341	6.29219e-18
Uncx	2.94847e-22	-0.209219	0.645	0.801	6.29969e-18
Ikbip	2.97501e-22	-0.581639	0.107	0.188	6.35641e-18
Pcgf6	3.01823e-22	-0.36098	0.349	0.486	6.44876e-18
Snapc1	3.0989e-22	-0.483341	0.198	0.308	6.62112e-18
Ndufa13	3.40011e-22	-0.166804	0.942	0.964	7.26468e-18
Prkar1a	3.45769e-22	0.326094	0.778	0.781	7.38769e-18
Nagk	3.83736e-22	-0.687248	0.099	0.178	8.1989e-18
Pdpn	3.97383e-22	-1.5038	0.018	0.056	8.49048e-18
Zdhhc2	4.37763e-22	-0.489474	0.182	0.287	9.35325e-18
Tbc1d16	4.51149e-22	-0.283807	0.682	0.81	9.63925e-18
Maml2	4.54532e-22	-0.617555	0.092	0.168	9.71153e-18
Uqcc2	4.63145e-22	-0.191114	0.858	0.92	9.89556e-18
Ift172	4.7053e-22	-0.677091	0.1	0.177	1.00534e-17
Mapk8ip3	4.94438e-22	-0.344231	0.297	0.43	1.05642e-17
Stat3	4.96326e-22	1.40241	0.159	0.084	1.06045e-17
Anp32b	5.01102e-22	0.170565	0.978	0.976	1.07065e-17
Gm2000	5.14751e-22	-0.356529	0.185	0.295	1.09982e-17
Nedd1	5.23053e-22	-0.428411	0.297	0.426	1.11755e-17
Dmxl1	5.28079e-22	-0.385432	0.43	0.568	1.12829e-17
Enpp2	5.3458e-22	-1.09866	0.023	0.063	1.14218e-17
Pycr1	5.44325e-22	0.98999	0.255	0.173	1.163e-17
Mitd1	5.48363e-22	-0.5987	0.134	0.222	1.17163e-17
Atp11b	5.50057e-22	-0.447389	0.333	0.468	1.17525e-17
Golph3l	5.63284e-22	-0.485449	0.193	0.298	1.20351e-17
Zfp329	5.73351e-22	-0.397312	0.417	0.559	1.22502e-17
S100a6	6.17197e-22	-1.1072	0.034	0.082	1.3187e-17
Mterf2	6.41929e-22	-0.535535	0.133	0.221	1.37155e-17
Kiz	6.52797e-22	-0.442314	0.182	0.288	1.39477e-17
Sfi1	6.87187e-22	-0.809987	0.057	0.117	1.46824e-17
Pfdn6	6.887e-22	0.295802	0.796	0.79	1.47148e-17
Flrt2	7.11807e-22	-0.509367	0.181	0.283	1.52085e-17
Rai1	7.20011e-22	-0.40597	0.384	0.516	1.53837e-17
Acaca	7.27197e-22	-0.388489	0.344	0.486	1.55373e-17
Nptx1	7.32751e-22	1.58282	0.159	0.084	1.56559e-17
Ccdc90b	7.45939e-22	-0.363012	0.358	0.5	1.59377e-17
Ralyl	7.48798e-22	-1.09739	0.034	0.081	1.59988e-17
Rpl14	7.74852e-22	0.135495	0.986	0.978	1.65555e-17
Lpar6	7.75623e-22	-0.541501	0.168	0.267	1.6572e-17
Svip	7.8374e-22	-0.588133	0.116	0.198	1.67454e-17
Cav2	8.38333e-22	-1.33099	0.023	0.063	1.79118e-17
Smim4	8.41492e-22	-0.435757	0.187	0.294	1.79793e-17
Mettl9	8.70235e-22	0.272132	0.858	0.853	1.85934e-17
Ifnar1	8.73934e-22	-0.416849	0.217	0.329	1.86725e-17
Arpc1b	9.20378e-22	-0.471135	0.169	0.268	1.96648e-17
Eif1b	9.25394e-22	0.278222	0.868	0.876	1.9772e-17
Alms1	9.29865e-22	-0.395481	0.272	0.397	1.98675e-17
Tmem245	9.34131e-22	-0.410921	0.269	0.391	1.99586e-17
Ndufab1	9.98415e-22	0.195725	0.954	0.952	2.13321e-17
Scn2a	1.02583e-21	-0.964572	0.072	0.136	2.1918e-17
Zfp423	1.04601e-21	0.920691	0.322	0.244	2.23491e-17
Ssc5d	1.06644e-21	-1.10389	0.029	0.073	2.27857e-17
St13	1.07469e-21	-0.243471	0.772	0.855	2.29619e-17
Spock1	1.1065e-21	-1.19349	0.032	0.077	2.36415e-17
Zfp266	1.14429e-21	-0.257281	0.734	0.854	2.44489e-17
Tesc	1.16867e-21	-1.24693	0.028	0.071	2.49698e-17
Zmat2	1.19238e-21	-0.220091	0.793	0.874	2.54763e-17
Ttc14	1.21501e-21	-0.293073	0.698	0.83	2.59599e-17
Tceanc2	1.21679e-21	-0.530805	0.121	0.206	2.59979e-17
Smtn	1.24284e-21	-0.717353	0.092	0.165	2.65546e-17
N4bp1	1.3163e-21	-0.404305	0.33	0.461	2.8124e-17
Itgav	1.3345e-21	-0.500687	0.273	0.392	2.85129e-17
Rpl3	1.36024e-21	0.10494	0.993	0.989	2.90628e-17
Ralgapa2	1.37789e-21	-0.388951	0.246	0.365	2.944e-17
Tmem230	1.39124e-21	-0.378902	0.3	0.43	2.97252e-17
Bckdhb	1.41725e-21	-0.388584	0.194	0.304	3.0281e-17
Gart	1.48196e-21	-0.360998	0.425	0.567	3.16636e-17
Adam22	1.64437e-21	-0.448032	0.188	0.293	3.51335e-17
Dbt	1.66055e-21	-0.61198	0.137	0.224	3.54794e-17
Med8	1.67791e-21	0.460659	0.582	0.553	3.58502e-17
mt-Nd2	1.81815e-21	-0.187187	0.992	0.993	3.88465e-17
Ndufv3	1.82314e-21	-0.278048	0.546	0.687	3.89533e-17
Tfap4	2.02353e-21	-0.381242	0.229	0.345	4.32348e-17
Glrx5	2.02392e-21	0.286853	0.812	0.805	4.32432e-17
Gpcpd1	2.04983e-21	-0.46959	0.238	0.356	4.37966e-17
Plin2	2.18237e-21	-0.456526	0.211	0.319	4.66284e-17
Cep250	2.22783e-21	-0.425639	0.196	0.303	4.75999e-17
Cacng4	2.26891e-21	1.56846	0.145	0.074	4.84775e-17
Arhgap18	2.44416e-21	-0.837125	0.056	0.114	5.2222e-17
Mrrf	2.44863e-21	-0.387996	0.25	0.368	5.23175e-17
Mccc2	2.65318e-21	-0.561719	0.112	0.193	5.66879e-17
Scnm1	2.68402e-21	-0.410039	0.181	0.286	5.73468e-17
2610001J05Rik	2.87026e-21	-0.362457	0.46	0.599	6.1326e-17
Snhg5	2.90616e-21	-0.40976	0.253	0.372	6.2093e-17
Kcnq3	2.99887e-21	-0.58113	0.137	0.226	6.40739e-17
Tgif1	3.08004e-21	-0.342582	0.295	0.422	6.5808e-17
Hsd17b11	3.25138e-21	-0.680263	0.094	0.168	6.9469e-17
Itpa	3.25577e-21	0.428461	0.622	0.599	6.95627e-17
2810403D21Rik	3.27865e-21	-0.772478	0.134	0.22	7.00516e-17
Rnpc3	3.55498e-21	-0.42667	0.22	0.332	7.59558e-17
March5	3.60027e-21	0.28996	0.778	0.781	7.69233e-17
Camk2d	3.67689e-21	-0.292384	0.268	0.392	7.85603e-17
Lrrc8c	3.88021e-21	-0.544914	0.128	0.216	8.29047e-17
Zeb2os	4.02915e-21	-0.594844	0.098	0.174	8.60869e-17
Csnk2a1	4.07923e-21	-0.185045	0.887	0.925	8.71568e-17
Rdm1	4.08402e-21	-0.340137	0.281	0.406	8.72592e-17
Prex2	4.28103e-21	-0.816188	0.068	0.131	9.14685e-17
Diaph2	4.31516e-21	-0.591395	0.123	0.208	9.21977e-17
Zfp931	4.49549e-21	-0.633558	0.102	0.178	9.60506e-17
Senp8	4.94869e-21	-0.742617	0.074	0.14	1.05734e-16
Pantr1	5.26905e-21	-0.307859	0.475	0.619	1.12578e-16
Slc38a6	5.34831e-21	-1.16495	0.034	0.081	1.14272e-16
C2cd3	5.46243e-21	-0.388341	0.267	0.392	1.1671e-16
Cacng7	5.48497e-21	-0.612338	0.095	0.169	1.17192e-16
Hsbp1	5.87275e-21	-0.177842	0.889	0.931	1.25477e-16
Ulk4	6.6615e-21	-0.503827	0.107	0.186	1.4233e-16
Ryk	7.1764e-21	0.340851	0.743	0.743	1.53331e-16
Fmc1	7.29677e-21	-0.270129	0.555	0.708	1.55903e-16
Zbtb1	7.30124e-21	-0.390845	0.307	0.433	1.55998e-16
Csrnp3	7.32874e-21	1.12791	0.216	0.138	1.56586e-16
Tmem267	8.31654e-21	-0.944545	0.031	0.076	1.77691e-16
Srsf11	9.02883e-21	0.207051	0.942	0.942	1.9291e-16
Fam13a	9.62458e-21	-1.07059	0.025	0.066	2.05639e-16
Trim27	9.69785e-21	0.484281	0.56	0.533	2.07204e-16
Fgd4	9.90425e-21	-0.309609	0.388	0.53	2.11614e-16
Nipsnap2	1.0136e-20	-0.449523	0.182	0.285	2.16566e-16
Btbd2	1.04524e-20	-0.421254	0.247	0.367	2.23325e-16
H2-Ke6	1.06982e-20	-0.334859	0.334	0.469	2.28577e-16
Kcnab1	1.09094e-20	-1.12947	0.037	0.084	2.33089e-16
Gpr27	1.11899e-20	-0.393864	0.218	0.325	2.39084e-16
Abcd2	1.1453e-20	-0.520251	0.14	0.229	2.44706e-16
6430590A07Rik	1.24325e-20	-0.576008	0.138	0.225	2.65632e-16
Wdpcp	1.31055e-20	-0.617745	0.079	0.146	2.80012e-16
Spa17	1.3326e-20	-0.655715	0.063	0.124	2.84724e-16
Hnrnpa3	1.33635e-20	-0.154633	0.984	0.985	2.85524e-16
Aars	1.34779e-20	0.711569	0.417	0.358	2.87969e-16
Gstp1	1.4144e-20	-0.335997	0.305	0.437	3.02201e-16
Iars	1.43116e-20	0.791206	0.391	0.329	3.05781e-16
Steap2	1.44515e-20	-0.850403	0.031	0.075	3.0877e-16
Vdac3	1.48118e-20	0.198404	0.951	0.948	3.16469e-16
Nav3	1.49159e-20	1.09782	0.209	0.132	3.18693e-16
Rtl8a	1.54532e-20	-0.412919	0.222	0.332	3.30172e-16
Dguok	1.5579e-20	-0.333759	0.363	0.503	3.3286e-16
Shf	1.58823e-20	0.573771	0.581	0.545	3.39341e-16
Sh3d19	1.6106e-20	-0.858505	0.054	0.11	3.44121e-16
Rnaset2a	1.63139e-20	-0.375021	0.161	0.256	3.48563e-16
Plekhn1	1.69842e-20	-0.569438	0.133	0.217	3.62885e-16
Mga	1.74322e-20	-0.348214	0.46	0.592	3.72455e-16
Chd7	1.75069e-20	-0.212818	0.835	0.912	3.74052e-16
Kit	1.85611e-20	-0.601911	0.1	0.175	3.96576e-16
Ctnnd1	1.87906e-20	-0.384724	0.345	0.476	4.0148e-16
Hist1h2bh	1.97491e-20	-0.494027	0.12	0.203	4.21959e-16
Elob	2.02703e-20	-0.114389	0.975	0.967	4.33095e-16
Kantr	2.09217e-20	-0.736858	0.057	0.114	4.47012e-16
Ift88	2.10711e-20	-0.554094	0.133	0.219	4.50206e-16
Yaf2	2.11152e-20	0.343553	0.704	0.682	4.51148e-16
Celsr1	2.12785e-20	-0.920044	0.044	0.096	4.54636e-16
Twnk	2.22129e-20	-0.510746	0.184	0.286	4.74601e-16
Cpt1c	2.25814e-20	-0.49071	0.117	0.197	4.82474e-16
Celsr2	2.31842e-20	0.329276	0.725	0.697	4.95354e-16
Jpx	2.40726e-20	-0.490004	0.185	0.286	5.14336e-16
Dync2h1	2.42639e-20	-0.408063	0.277	0.395	5.18423e-16
Tcea1	2.47921e-20	-0.253629	0.708	0.817	5.29709e-16
9930104L06Rik	2.66435e-20	-0.521101	0.119	0.2	5.69265e-16
2900093K20Rik	2.69274e-20	-0.680833	0.072	0.135	5.7533e-16
Gm15594	2.71592e-20	-0.97746	0.034	0.079	5.80283e-16
Lin7a	2.79365e-20	-0.796032	0.059	0.118	5.96891e-16
Mrps7	2.88309e-20	0.387741	0.667	0.667	6.16002e-16
Uhrf2	2.93562e-20	-0.321753	0.664	0.77	6.27224e-16
Egr1	2.95774e-20	0.562252	0.457	0.365	6.31951e-16
Gpr137c	2.96392e-20	-0.400566	0.256	0.374	6.3327e-16
Pdcd11	3.09576e-20	-0.470739	0.277	0.395	6.61441e-16
Ica1	3.15636e-20	-0.453482	0.124	0.209	6.74388e-16
Irx1	3.16934e-20	-0.86626	0.048	0.1	6.77162e-16
Gm11361	3.23573e-20	-0.268196	0.189	0.303	6.91345e-16
Brdt	3.33203e-20	-1.11429	0.021	0.058	7.11922e-16
Rps27rt	3.47662e-20	-0.391169	0.232	0.346	7.42815e-16
Ccnd3	3.50593e-20	0.871909	0.388	0.328	7.49078e-16
Mgst3	3.73996e-20	-0.268786	0.34	0.49	7.99081e-16
Pnpt1	4.0764e-20	-0.463755	0.19	0.29	8.70965e-16
Tmem98	4.25144e-20	-0.422806	0.134	0.221	9.08363e-16
Wdr78	4.30814e-20	-1.19526	0.021	0.059	9.20477e-16
8430429K09Rik	4.3646e-20	-0.636159	0.064	0.125	9.3254e-16
9430015G10Rik	4.40206e-20	-0.485647	0.155	0.248	9.40544e-16
Ascc3	4.91996e-20	-0.392414	0.252	0.369	1.0512e-15
Atg14	4.99974e-20	-0.556591	0.102	0.177	1.06824e-15
Gnb2	5.16449e-20	0.182275	0.958	0.955	1.10344e-15
Syt13	5.24725e-20	1.0002	0.245	0.165	1.12113e-15
Dusp16	5.37189e-20	-0.59302	0.17	0.264	1.14776e-15
Tmtc4	5.44056e-20	-0.72495	0.041	0.091	1.16243e-15
Rasl11a	5.53286e-20	1.14364	0.166	0.093	1.18215e-15
Ece1	5.55269e-20	-1.03391	0.041	0.09	1.18639e-15
Ankrd24	5.69773e-20	-0.550809	0.108	0.185	1.21738e-15
Tm9sf2	5.76933e-20	-0.312789	0.377	0.519	1.23268e-15
Irs2	5.78473e-20	-0.454361	0.132	0.217	1.23597e-15
Mrps14	5.97128e-20	-0.202945	0.806	0.883	1.27582e-15
Prxl2a	6.25771e-20	-0.521297	0.136	0.221	1.33702e-15
Sgip1	6.26312e-20	-0.446913	0.179	0.277	1.33818e-15
Mid1	6.29342e-20	-0.648045	0.1	0.174	1.34465e-15
Ube2d2a	6.33774e-20	0.24785	0.855	0.864	1.35412e-15
Scpep1	6.49131e-20	-0.40891	0.203	0.312	1.38693e-15
Tmem218	6.70161e-20	-0.428774	0.204	0.306	1.43187e-15
Ccdc112	6.93001e-20	-0.388703	0.217	0.321	1.48067e-15
Myt1	7.42282e-20	1.1482	0.218	0.143	1.58596e-15
Pcyox1l	7.75847e-20	-0.48624	0.152	0.241	1.65768e-15
Nudt1	7.97765e-20	-0.417226	0.181	0.28	1.70451e-15
Adrm1	8.01161e-20	0.42567	0.618	0.602	1.71176e-15
Ccpg1os	8.03456e-20	-0.722618	0.058	0.115	1.71666e-15
Ezr	8.14705e-20	0.345482	0.753	0.727	1.7407e-15
Ralgapa1	8.42161e-20	-0.343355	0.381	0.517	1.79936e-15
Pkn2	8.60055e-20	-0.279026	0.604	0.734	1.83759e-15
Mras	8.77443e-20	0.897926	0.297	0.225	1.87475e-15
Dad1	9.01336e-20	0.282167	0.803	0.813	1.92579e-15
Uspl1	9.31436e-20	-0.447445	0.224	0.329	1.99011e-15
Adck5	9.45972e-20	-0.400935	0.233	0.341	2.02116e-15
Mafb	9.73829e-20	-0.376781	0.284	0.399	2.08068e-15
Dnajc15	1.00406e-19	-0.285347	0.515	0.655	2.14528e-15
Sdha	1.05759e-19	-0.304333	0.6	0.727	2.25964e-15
Irx5	1.09862e-19	0.980636	0.201	0.124	2.34731e-15
Six5	1.11994e-19	-1.30521	0.019	0.055	2.39286e-15
Fkbp2	1.12279e-19	0.283115	0.821	0.814	2.39896e-15
Slc25a23	1.12573e-19	-0.434438	0.238	0.349	2.40524e-15
Sgpp1	1.17371e-19	-0.456594	0.147	0.235	2.50775e-15
Rab7	1.19506e-19	0.420752	0.593	0.573	2.55336e-15
Ndufa2	1.24096e-19	-0.142287	0.942	0.953	2.65144e-15
Txnl1	1.25351e-19	0.222681	0.913	0.92	2.67825e-15
Pigf	1.28489e-19	0.548561	0.459	0.406	2.7453e-15
Epb41l5	1.38965e-19	-0.440281	0.179	0.274	2.96914e-15
Tmem121b	1.40741e-19	-0.650615	0.056	0.112	3.00708e-15
Ptch1	1.44423e-19	-0.255596	0.786	0.877	3.08575e-15
Timm44	1.52313e-19	-0.311088	0.289	0.416	3.25432e-15
Babam2	1.53589e-19	-0.351358	0.275	0.397	3.28159e-15
Pcca	1.5676e-19	-0.415179	0.203	0.307	3.34933e-15
Shb	1.58306e-19	2.74568	0.053	0.01	3.38236e-15
Foxj2	1.59547e-19	-0.571231	0.081	0.148	3.40889e-15
Armh4	1.59567e-19	-0.786628	0.074	0.137	3.4093e-15
Fcho2	1.60352e-19	-0.405798	0.276	0.393	3.42609e-15
Tenm3	1.60713e-19	-0.923874	0.042	0.091	3.4338e-15
Olfm2	1.65045e-19	-1.23689	0.023	0.06	3.52636e-15
Rtl8b	1.66689e-19	-0.372232	0.195	0.299	3.56147e-15
Fyco1	1.67456e-19	-0.678953	0.091	0.161	3.57786e-15
A730020E08Rik	1.68401e-19	-0.36893	0.191	0.293	3.59805e-15
Kmt2d	1.70717e-19	-0.371895	0.251	0.366	3.64753e-15
Mphosph8	1.76641e-19	-0.281871	0.676	0.783	3.77412e-15
Mterf1a	1.77917e-19	-0.633758	0.082	0.149	3.80137e-15
Dgkz	1.7873e-19	-0.306211	0.295	0.418	3.81875e-15
Rmi2	1.83407e-19	-0.426302	0.133	0.219	3.91867e-15
0610030E20Rik	1.84373e-19	-0.353752	0.287	0.406	3.93931e-15
Mkrn1	1.93587e-19	0.449674	0.598	0.58	4.13617e-15
Ninl	2.05717e-19	-0.899781	0.045	0.095	4.39535e-15
Gpatch8	2.06211e-19	-0.336332	0.602	0.734	4.40591e-15
Mettl23	2.11567e-19	-0.262554	0.424	0.572	4.52033e-15
Ctsd	2.16826e-19	-0.331531	0.309	0.437	4.6327e-15
Gprasp2	2.21159e-19	-0.432186	0.169	0.264	4.72528e-15
Zfp738	2.21365e-19	-0.624219	0.097	0.168	4.72969e-15
Etfb	2.23833e-19	-0.265036	0.529	0.678	4.78242e-15
Brd7	2.33969e-19	-0.259915	0.664	0.79	4.99898e-15
Tmem107	2.38599e-19	-0.321789	0.328	0.457	5.09791e-15
Pros1	2.4522e-19	-0.835555	0.062	0.12	5.23936e-15
Ints6	2.47222e-19	-0.393582	0.336	0.469	5.28214e-15
Nceh1	2.59065e-19	-0.73638	0.071	0.132	5.53518e-15
Slc35a3	2.65624e-19	-0.520718	0.1	0.174	5.67532e-15
Trap1	2.66309e-19	-0.37216	0.293	0.42	5.68995e-15
Epha3	2.6976e-19	-0.583256	0.164	0.252	5.76369e-15
Ist1	2.84714e-19	-0.395701	0.315	0.44	6.08319e-15
Srpr	2.89961e-19	-0.431876	0.333	0.456	6.19531e-15
Ube2g1	3.04573e-19	0.506381	0.504	0.457	6.50751e-15
Cep57l1	3.29481e-19	-0.433243	0.217	0.322	7.03969e-15
Ddah2	3.54402e-19	0.241602	0.968	0.964	7.57216e-15
Mbtps1	3.56695e-19	-0.364601	0.363	0.497	7.62115e-15
Eml5	3.6033e-19	-0.451615	0.229	0.336	7.69882e-15
Trpm7	3.76791e-19	-0.323719	0.407	0.547	8.05052e-15
Slitrk5	3.83631e-19	-0.437568	0.226	0.335	8.19666e-15
Ddx39	3.87633e-19	0.338469	0.723	0.702	8.28216e-15
Timm50	3.88166e-19	0.322732	0.758	0.762	8.29355e-15
Pcnt	3.91662e-19	-0.356187	0.389	0.512	8.36825e-15
Glcci1	3.99896e-19	-0.375066	0.343	0.469	8.54418e-15
Zfp882	4.04744e-19	-0.506515	0.118	0.196	8.64775e-15
Erf	4.39845e-19	-0.645624	0.082	0.147	9.39773e-15
Etf1	4.42606e-19	0.391259	0.655	0.643	9.45673e-15
Ptgr2	4.45572e-19	-0.788513	0.044	0.093	9.52009e-15
Nek4	4.54181e-19	-0.486014	0.144	0.229	9.70403e-15
Pcdhgc3	4.63745e-19	-0.525708	0.146	0.231	9.90837e-15
Zranb3	4.82973e-19	-0.568252	0.129	0.211	1.03192e-14
Cep112	4.86785e-19	-0.538349	0.125	0.205	1.04007e-14
AW554918	5.28367e-19	-0.429965	0.19	0.29	1.12891e-14
Ndufaf2	5.39715e-19	-0.272868	0.462	0.603	1.15316e-14
Dzip3	5.72619e-19	-0.301656	0.479	0.614	1.22346e-14
Cyc1	5.8063e-19	0.235799	0.868	0.866	1.24057e-14
Rapgef4	5.88394e-19	-0.914294	0.028	0.069	1.25716e-14
Lrp8	5.96155e-19	1.05542	0.193	0.12	1.27375e-14
Anapc11	5.98135e-19	-0.22112	0.72	0.816	1.27798e-14
Pigg	6.21305e-19	-0.818222	0.042	0.09	1.32748e-14
Gm28050	6.41063e-19	-0.679581	0.076	0.139	1.36969e-14
Dock1	6.42115e-19	-0.340079	0.377	0.502	1.37194e-14
Lmbrd1	6.54892e-19	-0.412006	0.165	0.256	1.39924e-14
Lsp1	6.57973e-19	1.37906	0.125	0.061	1.40582e-14
Fbxl20	6.60138e-19	-0.535061	0.142	0.226	1.41045e-14
Stk3	6.74772e-19	-0.412776	0.229	0.337	1.44172e-14
Tmem243	6.75748e-19	-0.396178	0.208	0.314	1.4438e-14
Slc25a13	6.81191e-19	-0.736805	0.049	0.1	1.45543e-14
Stag1	6.81476e-19	-0.250484	0.698	0.805	1.45604e-14
Dhx8	6.89999e-19	-0.333319	0.252	0.371	1.47425e-14
Prr5	7.3893e-19	1.66951	0.083	0.029	1.5788e-14
9530053A07Rik	7.51556e-19	1.84004	0.078	0.026	1.60577e-14
Arnt	7.65944e-19	-0.407978	0.203	0.309	1.63652e-14
Dscaml1	7.81538e-19	1.03504	0.162	0.091	1.66983e-14
Tpp1	7.87988e-19	-0.610332	0.117	0.194	1.68361e-14
Zfp516	8.81913e-19	-0.499601	0.148	0.234	1.8843e-14
Clcc1	8.83457e-19	-0.415922	0.229	0.335	1.8876e-14
Ctnnbip1	9.184e-19	0.485949	0.548	0.517	1.96225e-14
Rpp25l	9.39397e-19	0.466267	0.582	0.571	2.00712e-14
Clns1a	9.41183e-19	0.348939	0.676	0.675	2.01093e-14
Znrd1as	9.58187e-19	-0.587586	0.07	0.131	2.04726e-14
Igf2bp3	9.72194e-19	0.881999	0.228	0.153	2.07719e-14
Rhobtb3	9.73099e-19	-0.298422	0.507	0.644	2.07912e-14
Gabrd	1.00112e-18	-0.944718	0.028	0.068	2.13899e-14
Tut4	1.00271e-18	-0.258099	0.728	0.836	2.14239e-14
Zfp84	1.01856e-18	-0.434961	0.2	0.3	2.17626e-14
Mib2	1.02152e-18	-0.691022	0.072	0.133	2.18258e-14
Gm16286	1.02238e-18	0.296331	0.739	0.734	2.18442e-14
Flna	1.02611e-18	-0.350927	0.538	0.654	2.19238e-14
Mad2l2	1.02751e-18	-0.282592	0.454	0.601	2.19537e-14
Rdh14	1.02996e-18	-0.603803	0.095	0.164	2.2006e-14
Lpar4	1.03664e-18	-0.55514	0.089	0.157	2.21487e-14
Scrt2	1.04081e-18	0.918739	0.241	0.165	2.22379e-14
Sars	1.0695e-18	0.324169	0.764	0.769	2.2851e-14
Gm46218	1.07012e-18	-1.33408	0.02	0.054	2.28641e-14
Zfp955a	1.08714e-18	-0.520181	0.095	0.165	2.32279e-14
Acbd5	1.11113e-18	-0.408587	0.254	0.368	2.37403e-14
Rims1	1.13801e-18	-0.578154	0.101	0.172	2.43146e-14
Prkd1	1.14781e-18	-0.835436	0.061	0.118	2.45241e-14
Dcaf17	1.17918e-18	-0.518213	0.184	0.277	2.51944e-14
Spata1	1.26942e-18	-0.963859	0.033	0.075	2.71224e-14
Ptcd3	1.2863e-18	-0.375247	0.318	0.443	2.7483e-14
Atp9b	1.30414e-18	-0.49706	0.153	0.241	2.78643e-14
Pcsk9	1.32289e-18	1.9818	0.075	0.024	2.82648e-14
Myadm	1.36214e-18	-0.651583	0.097	0.167	2.91034e-14
Zfp326	1.47141e-18	-0.218736	0.775	0.86	3.14381e-14
Hacd2	1.47888e-18	-0.364644	0.297	0.419	3.15977e-14
Cops7a	1.48323e-18	-0.325836	0.358	0.491	3.16907e-14
Ccdc30	1.51294e-18	-0.561378	0.086	0.152	3.23254e-14
Kbtbd3	1.53212e-18	-0.675328	0.068	0.127	3.27354e-14
Ier3ip1	1.54587e-18	-0.227516	0.702	0.809	3.3029e-14
Mblac2	1.57347e-18	-0.961895	0.031	0.073	3.36188e-14
Vps13a	1.59868e-18	-0.369717	0.289	0.406	3.41573e-14
Cfap97	1.67023e-18	-0.40216	0.287	0.403	3.56862e-14
Ak2	1.69747e-18	0.342413	0.707	0.697	3.62682e-14
Pvt1	1.70868e-18	-0.826174	0.054	0.108	3.65077e-14
Zranb2	1.77156e-18	-0.196436	0.851	0.918	3.78512e-14
Cyyr1	1.87972e-18	-1.16908	0.029	0.069	4.01621e-14
Sgo1	1.88606e-18	-0.445167	0.495	0.579	4.02977e-14
Isca1	1.89822e-18	-0.46807	0.167	0.259	4.05574e-14
Slc12a5	1.95787e-18	-1.12503	0.026	0.064	4.18319e-14
Proser3	1.96727e-18	-0.412913	0.111	0.187	4.20326e-14
Pdcd4	1.97777e-18	-0.321543	0.422	0.554	4.2257e-14
Alx4	2.02082e-18	-0.88542	0.052	0.103	4.31769e-14
Igip	2.02717e-18	-0.704405	0.064	0.121	4.33125e-14
Spock2	2.10516e-18	-0.71797	0.068	0.126	4.49789e-14
2810402E24Rik	2.12483e-18	-0.535973	0.093	0.16	4.53991e-14
Fut10	2.13575e-18	-0.723657	0.051	0.102	4.56323e-14
Lnpep	2.1362e-18	-0.397279	0.251	0.358	4.56421e-14
D130020L05Rik	2.16293e-18	-0.997767	0.03	0.07	4.62133e-14
Gm31409	2.21524e-18	-0.60191	0.091	0.157	4.73308e-14
Susd6	2.33177e-18	-0.384745	0.211	0.315	4.98206e-14
Kcnma1	2.37786e-18	-0.869123	0.042	0.089	5.08054e-14
Slc25a36	2.3955e-18	-0.386174	0.323	0.446	5.11822e-14
Phactr3	2.40356e-18	-0.666588	0.065	0.122	5.13544e-14
Huwe1	2.47614e-18	-0.279225	0.783	0.871	5.29051e-14
Trim24	2.52885e-18	-0.31085	0.486	0.619	5.40313e-14
Ccdc28a	2.53186e-18	-0.739402	0.062	0.118	5.40957e-14
Josd1	2.59847e-18	-0.347205	0.253	0.371	5.55188e-14
Hbp1	2.6302e-18	-0.270836	0.344	0.47	5.61968e-14
Adamtsl1	2.63326e-18	-1.11094	0.032	0.073	5.62623e-14
Ccdc18	2.65369e-18	-0.389096	0.322	0.437	5.66987e-14
Timm17a	2.72488e-18	0.267379	0.803	0.823	5.82198e-14
Cir1	2.77007e-18	-0.317619	0.375	0.503	5.91852e-14
Atp10a	2.84378e-18	-0.969057	0.023	0.059	6.07603e-14
Akt1	2.90034e-18	-0.285817	0.643	0.759	6.19686e-14
Zscan22	2.93008e-18	-0.99063	0.043	0.09	6.2604e-14
Tbc1d2b	2.96083e-18	-0.539425	0.085	0.152	6.32611e-14
Ctps	3.02895e-18	0.36649	0.63	0.608	6.47166e-14
Lysmd1	3.10972e-18	-0.675841	0.062	0.119	6.64422e-14
Micu1	3.13678e-18	-0.299027	0.313	0.437	6.70204e-14
Klf6	3.20253e-18	-0.401814	0.392	0.502	6.84254e-14
Lyrm2	3.21277e-18	-0.29446	0.429	0.567	6.86441e-14
Uck2	3.27e-18	-0.305677	0.36	0.487	6.98668e-14
Ccne1	3.4907e-18	0.789099	0.291	0.213	7.45823e-14
Rft1	3.4956e-18	-0.672424	0.061	0.116	7.4687e-14
Hnrnpk	3.5085e-18	0.128734	0.988	0.981	7.49627e-14
Rbbp9	3.53221e-18	-0.451174	0.165	0.254	7.54691e-14
Deptor	3.57035e-18	-1.24036	0.029	0.068	7.6284e-14
Gfpt1	3.68511e-18	-0.360812	0.235	0.343	7.87361e-14
Tecta	3.79719e-18	1.72401	0.076	0.026	8.11308e-14
Bambi	3.80033e-18	-0.600153	0.099	0.169	8.11977e-14
Ube2l3	3.94174e-18	0.260218	0.841	0.842	8.42193e-14
Rcc1	3.98305e-18	0.566203	0.467	0.421	8.51019e-14
Wrn	4.00519e-18	-0.458713	0.164	0.253	8.55748e-14
Peli2	4.01348e-18	-0.306743	0.393	0.525	8.5752e-14
Sstr2	4.03969e-18	0.742068	0.357	0.283	8.63121e-14
Med12l	4.18921e-18	-0.513197	0.129	0.21	8.95066e-14
Ctnnb1	4.19721e-18	0.231387	0.883	0.888	8.96776e-14
5031425E22Rik	4.22828e-18	-0.353549	0.301	0.417	9.03415e-14
Kirrel	4.28847e-18	-0.670789	0.069	0.127	9.16275e-14
Nfkbia	4.35672e-18	-0.364338	0.366	0.499	9.30857e-14
Hltf	4.53711e-18	-0.460093	0.21	0.308	9.69399e-14
Insig1	4.58641e-18	-0.35224	0.387	0.512	9.79932e-14
AC160336.1	4.70653e-18	-0.909744	0.033	0.074	1.0056e-13
Usp51	4.75966e-18	-0.836144	0.05	0.101	1.01695e-13
Dda1	4.77857e-18	0.403877	0.633	0.617	1.02099e-13
Acer3	4.83411e-18	1.10569	0.164	0.094	1.03286e-13
Clic1	4.9299e-18	0.397384	0.836	0.86	1.05332e-13
Serbp1	5.15482e-18	0.124581	0.988	0.983	1.10138e-13
Dele1	5.60694e-18	-0.414949	0.254	0.366	1.19798e-13
9330020H09Rik	5.61157e-18	-0.747347	0.057	0.11	1.19897e-13
Dph6	5.61495e-18	-0.396693	0.264	0.374	1.19969e-13
C230057M02Rik	5.64334e-18	-0.478943	0.12	0.196	1.20576e-13
Rab11fip2	5.68892e-18	-0.307943	0.4	0.539	1.21549e-13
Chka	5.71754e-18	-0.328741	0.338	0.465	1.22161e-13
Hist1h2bg	5.89762e-18	-0.687714	0.069	0.127	1.26009e-13
Sgpl1	6.00361e-18	-0.393096	0.265	0.378	1.28273e-13
Arl6ip5	6.18417e-18	-0.298099	0.416	0.563	1.32131e-13
Lpcat1	6.22751e-18	-0.323495	0.301	0.423	1.33057e-13
Xrcc4	6.3505e-18	-0.46133	0.151	0.238	1.35685e-13
Lonp2	6.46011e-18	-0.319943	0.237	0.346	1.38027e-13
Ndufa11	6.50063e-18	0.258109	0.85	0.846	1.38892e-13
Bloc1s2	6.68975e-18	0.468516	0.533	0.51	1.42933e-13
Gm4221	6.70129e-18	-1.29937	0.021	0.055	1.4318e-13
Fam3c	6.89064e-18	-0.354167	0.277	0.393	1.47225e-13
Mthfsl	6.99061e-18	-0.421398	0.153	0.239	1.49361e-13
Slx4ip	7.13512e-18	-0.386787	0.187	0.283	1.52449e-13
Fam120c	7.1962e-18	-0.85842	0.048	0.097	1.53754e-13
Mrps17	7.21694e-18	0.278418	0.792	0.803	1.54197e-13
Gtpbp8	7.27824e-18	-0.449263	0.161	0.248	1.55507e-13
Appl1	7.33969e-18	-0.277227	0.51	0.651	1.5682e-13
2310040G24Rik	7.34263e-18	-0.560801	0.113	0.185	1.56883e-13
Camk2n1	7.51747e-18	0.80837	0.271	0.194	1.60618e-13
Hsd11b2	7.55952e-18	-0.258139	0.504	0.633	1.61517e-13
Sptbn1	7.64127e-18	0.458773	0.627	0.612	1.63263e-13
Gm20342	7.71101e-18	-0.646231	0.077	0.137	1.64753e-13
Vps13c	7.98613e-18	-0.479995	0.186	0.278	1.70632e-13
Mrps33	8.05286e-18	0.194199	0.923	0.923	1.72057e-13
Tob1	8.26454e-18	-0.269608	0.411	0.55	1.7658e-13
Tmem161b	8.32794e-18	-0.350431	0.263	0.375	1.77935e-13
Vapa	8.39225e-18	0.191925	0.932	0.93	1.79309e-13
Nemp2	8.43515e-18	-0.631522	0.074	0.135	1.80225e-13
Fgd6	8.69383e-18	-0.434316	0.236	0.341	1.85752e-13
Klhdc2	8.77005e-18	0.246621	0.86	0.863	1.87381e-13
Atr	8.86006e-18	-0.45045	0.222	0.324	1.89304e-13
Trp53inp2	8.9244e-18	0.954007	0.23	0.159	1.90679e-13
Btbd7	8.97888e-18	-0.274299	0.469	0.603	1.91843e-13
Hsd17b4	9.07409e-18	-0.30926	0.305	0.43	1.93877e-13
Gm9856	9.29059e-18	-0.922541	0.051	0.101	1.98503e-13
Nsun3	9.35391e-18	-0.610962	0.069	0.127	1.99856e-13
Nvl	9.82248e-18	-0.326718	0.424	0.553	2.09867e-13
Wdr43	9.97553e-18	-0.285342	0.57	0.705	2.13137e-13
Qtrt2	1.01196e-17	-0.430268	0.176	0.267	2.16215e-13
Hcfc1r1	1.02058e-17	-0.326932	0.373	0.501	2.18058e-13
Slc25a27	1.05513e-17	-0.31478	0.553	0.686	2.25438e-13
Rubcn	1.11906e-17	-0.482248	0.097	0.165	2.39098e-13
Gm17056	1.12975e-17	-1.26229	0.026	0.063	2.41382e-13
Irs1	1.13948e-17	-0.328061	0.335	0.463	2.4346e-13
Col9a3	1.16114e-17	0.63313	0.458	0.405	2.48089e-13
Xpr1	1.19263e-17	-0.400145	0.244	0.35	2.54817e-13
Mak16	1.19525e-17	0.400073	0.603	0.587	2.55377e-13
Clybl	1.22537e-17	-0.323853	0.253	0.364	2.61813e-13
Btrc	1.23124e-17	-0.456178	0.184	0.277	2.63067e-13
Supt3	1.26303e-17	-0.385389	0.175	0.268	2.69859e-13
Trim59	1.27182e-17	-0.348212	0.62	0.704	2.71738e-13
2810454H06Rik	1.27762e-17	-0.614639	0.099	0.168	2.72976e-13
Gsdme	1.29172e-17	-0.314768	0.336	0.465	2.75989e-13
Kmt2e	1.29941e-17	-0.228627	0.741	0.832	2.77633e-13
Chic2	1.33869e-17	0.326615	0.71	0.72	2.86024e-13
Odr4	1.35273e-17	-0.35303	0.327	0.447	2.89025e-13
Fxyd6	1.40028e-17	0.310114	0.834	0.843	2.99183e-13
Map2k2	1.40239e-17	0.265437	0.799	0.802	2.99634e-13
Stn1	1.41035e-17	-0.485572	0.083	0.147	3.01336e-13
Siae	1.4221e-17	-1.10731	0.029	0.067	3.03845e-13
Pou4f1	1.42917e-17	1.3545	0.119	0.059	3.05357e-13
Mettl27	1.45579e-17	-0.611063	0.058	0.111	3.11045e-13
Galnt1	1.48103e-17	-0.273865	0.425	0.56	3.16438e-13
Zfp260	1.52334e-17	-0.297162	0.478	0.615	3.25477e-13
Smarcc1	1.53523e-17	0.22022	0.882	0.886	3.28017e-13
Eif4e	1.55258e-17	0.266892	0.793	0.787	3.31724e-13
Baz2b	1.59935e-17	-0.292821	0.512	0.643	3.41716e-13
Rrnad1	1.61142e-17	-0.368936	0.137	0.221	3.44297e-13
Smc2	1.64984e-17	0.230056	0.919	0.891	3.52504e-13
Stx1b	1.66577e-17	-0.459898	0.126	0.202	3.55909e-13
Atp2b1	1.67016e-17	-0.19329	0.796	0.883	3.56845e-13
Suclg2	1.67483e-17	-0.565813	0.13	0.207	3.57844e-13
Prmt5	1.73354e-17	-0.283753	0.372	0.502	3.70388e-13
Pmvk	1.74153e-17	0.6326	0.37	0.305	3.72094e-13
Cd302	1.79324e-17	-0.768342	0.076	0.136	3.83144e-13
Bet1	1.8763e-17	-0.30414	0.336	0.465	4.0089e-13
En2	1.90092e-17	-0.319699	0.374	0.507	4.06151e-13
Cryz	1.91647e-17	-0.558364	0.122	0.196	4.09473e-13
Rnd2	1.93722e-17	0.385712	0.606	0.562	4.13907e-13
Hnrnpa2b1	1.94483e-17	-0.144188	0.989	0.991	4.15531e-13
D830024N08Rik	1.96616e-17	-0.619552	0.025	0.063	4.2009e-13
Trip4	1.9775e-17	-0.413567	0.196	0.292	4.22513e-13
Nelfb	2.02729e-17	-0.323535	0.312	0.434	4.33151e-13
Tomm40l	2.05855e-17	-0.448119	0.116	0.19	4.39831e-13
Spcs3	2.10544e-17	-0.330264	0.26	0.375	4.49849e-13
Cox6b1	2.11163e-17	-0.113673	0.969	0.968	4.51171e-13
Hhip	2.12945e-17	0.979892	0.298	0.229	4.54978e-13
Pkm	2.1522e-17	0.182544	0.948	0.954	4.59839e-13
Tsga10	2.20084e-17	-0.471222	0.184	0.277	4.70231e-13
St6gal1	2.21012e-17	-0.611352	0.105	0.174	4.72214e-13
Adgrb2	2.23888e-17	-0.297327	0.353	0.482	4.78359e-13
Pde4d	2.24522e-17	-0.420684	0.223	0.32	4.79713e-13
Taco1os	2.35388e-17	-0.910718	0.042	0.087	5.0293e-13
Klhl42	2.37622e-17	-0.489683	0.113	0.185	5.07704e-13
Bmt2	2.40784e-17	-0.380905	0.225	0.329	5.14458e-13
Lrrc8d	2.46566e-17	-0.367639	0.199	0.294	5.26813e-13
Rida	2.49054e-17	-0.436425	0.17	0.258	5.32128e-13
Ndufa6	2.55617e-17	-0.202354	0.77	0.856	5.4615e-13
F2r	2.57926e-17	-0.354814	0.198	0.295	5.51085e-13
Itm2c	2.61531e-17	-0.357444	0.28	0.394	5.58787e-13
Has2	2.63249e-17	-0.795989	0.062	0.117	5.62458e-13
B3galnt2	2.6523e-17	-0.460335	0.146	0.228	5.66689e-13
Cdkn1b	2.70161e-17	-0.201297	0.81	0.885	5.77226e-13
Txndc16	2.71996e-17	-0.424377	0.211	0.311	5.81147e-13
Zc3h4	2.7459e-17	-0.318011	0.274	0.388	5.86689e-13
Rab3gap1	2.81288e-17	-0.401089	0.204	0.301	6.01e-13
Gap43	3.12059e-17	0.64427	0.649	0.654	6.66746e-13
Snx14	3.15864e-17	-0.629033	0.12	0.193	6.74875e-13
Upp1	3.41907e-17	-0.842818	0.032	0.072	7.30518e-13
Srbd1	3.48748e-17	-0.363386	0.244	0.351	7.45135e-13
Rad1	3.50753e-17	-0.353972	0.232	0.342	7.4942e-13
Cnnm3	3.51773e-17	-0.361738	0.327	0.442	7.51598e-13
Actb	3.57091e-17	0.103015	0.998	0.993	7.6296e-13
Prxl2c	3.61372e-17	-0.493666	0.127	0.202	7.72108e-13
Rbm28	3.61586e-17	-0.275026	0.52	0.651	7.72564e-13
Cfap74	3.68368e-17	-1.22128	0.022	0.056	7.87054e-13
Cenpw	3.70006e-17	-0.332897	0.48	0.584	7.90555e-13
Dennd2a	3.71788e-17	-0.316626	0.407	0.543	7.94362e-13
Nmt1	3.73251e-17	-0.308995	0.438	0.57	7.97488e-13
Ndufb3	3.82064e-17	-0.181952	0.798	0.871	8.16317e-13
Pomk	4.08149e-17	-0.676874	0.052	0.102	8.72051e-13
Sarm1	4.11558e-17	-0.595504	0.074	0.133	8.79335e-13
Zfp189	4.14885e-17	-0.591453	0.077	0.137	8.86444e-13
Hist1h2ap	4.19167e-17	-0.848006	0.725	0.759	8.95592e-13
Nsmaf	4.24343e-17	-0.480381	0.141	0.222	9.06652e-13
E130307A14Rik	4.32924e-17	-0.374857	0.161	0.25	9.24985e-13
Xylt2	4.34638e-17	-0.422058	0.135	0.214	9.28647e-13
Gm3764	4.36187e-17	0.714597	0.322	0.25	9.31957e-13
Ctsf	4.38282e-17	-0.599742	0.103	0.17	9.36433e-13
Atp6v0e2	4.45391e-17	-0.270206	0.378	0.512	9.51623e-13
Enah	4.46799e-17	0.283686	0.72	0.7	9.54631e-13
Spin4	4.5275e-17	-0.596256	0.101	0.169	9.67346e-13
Bckdha	4.73205e-17	-0.374093	0.199	0.295	1.01105e-12
D330023K18Rik	4.73556e-17	-0.916392	0.041	0.085	1.0118e-12
Hist1h1e	4.76701e-17	-0.578363	0.745	0.788	1.01852e-12
Ggps1	4.80636e-17	-0.292252	0.319	0.44	1.02693e-12
Sept4	4.89153e-17	0.844958	0.381	0.323	1.04513e-12
Rimklb	5.04602e-17	-0.627459	0.056	0.108	1.07813e-12
Crat	5.05138e-17	-0.393128	0.118	0.192	1.07928e-12
Bcl11a	5.11808e-17	-0.294338	0.552	0.671	1.09353e-12
Bok	5.12912e-17	0.288915	0.86	0.871	1.09589e-12
Itih3	5.20085e-17	-1.28428	0.019	0.051	1.11121e-12
Pde4a	5.22853e-17	-1.04523	0.028	0.066	1.11713e-12
Gm12166	5.40938e-17	-0.841883	0.036	0.079	1.15577e-12
Rad51b	5.44192e-17	-0.547762	0.11	0.182	1.16272e-12
Rnf13	5.54325e-17	-0.34152	0.309	0.429	1.18437e-12
Auh	5.58759e-17	-0.319961	0.312	0.436	1.19384e-12
4930426I24Rik	5.5995e-17	-0.79411	0.045	0.092	1.19639e-12
Ift46	5.64492e-17	-0.331517	0.248	0.357	1.20609e-12
Sod1	5.67886e-17	-0.242807	0.578	0.699	1.21335e-12
Galnt13	5.73356e-17	-0.814132	0.045	0.092	1.22503e-12
Fam160a2	5.75426e-17	-0.427674	0.14	0.221	1.22946e-12
Rpp21	5.82267e-17	-0.28888	0.405	0.542	1.24407e-12
Ncoa7	5.87592e-17	-0.280909	0.366	0.498	1.25545e-12
Mob4	6.07346e-17	0.324496	0.711	0.723	1.29765e-12
Ccs	6.53617e-17	-0.33742	0.156	0.243	1.39652e-12
Pnisr	6.61059e-17	-0.190056	0.867	0.935	1.41242e-12
B230369F24Rik	6.66291e-17	-0.800902	0.044	0.09	1.4236e-12
Fbxo30	6.68761e-17	-0.35263	0.211	0.311	1.42888e-12
Angpt1	6.86251e-17	-0.432142	0.146	0.227	1.46624e-12
Aldh6a1	6.99064e-17	-0.760184	0.043	0.089	1.49362e-12
Phykpl	7.03825e-17	-0.453039	0.137	0.216	1.50379e-12
Hsd17b10	7.18068e-17	-0.246359	0.523	0.663	1.53422e-12
Mcf2l	7.30024e-17	-0.490733	0.099	0.165	1.55977e-12
Mplkip	7.33295e-17	-0.261968	0.446	0.587	1.56676e-12
Ankrd49	7.37671e-17	-0.371837	0.275	0.384	1.57611e-12
Acadsb	7.48071e-17	-0.430366	0.189	0.28	1.59833e-12
Zfp111	7.76461e-17	-0.542112	0.115	0.188	1.65899e-12
Hist1h3c	7.76502e-17	-0.588453	0.262	0.353	1.65907e-12
Yeats2	7.81218e-17	-0.297315	0.394	0.524	1.66915e-12
Stx4a	7.81362e-17	-0.30207	0.257	0.368	1.66946e-12
Clip3	8.02914e-17	-0.267454	0.47	0.605	1.71551e-12
Hdac9	8.05687e-17	-0.414947	0.212	0.309	1.72143e-12
Prox1	8.06337e-17	-0.224795	0.608	0.734	1.72282e-12
Hip1r	8.12942e-17	0.790728	0.363	0.303	1.73693e-12
Gns	8.30459e-17	-0.417774	0.121	0.196	1.77436e-12
Mrps5	8.47454e-17	-0.274781	0.62	0.733	1.81067e-12
Zfp239	8.60264e-17	-0.43711	0.127	0.203	1.83804e-12
Adrb2	8.60925e-17	-1.15733	0.027	0.064	1.83945e-12
Yap1	8.78267e-17	-0.96349	0.034	0.074	1.87651e-12
mt-Co1	8.83963e-17	-0.131224	0.999	0.999	1.88868e-12
Slc46a2	9.03217e-17	-1.13494	0.022	0.056	1.92981e-12
Nrsn1	9.06106e-17	-0.79392	0.034	0.074	1.93599e-12
Npc2	9.15057e-17	-0.218605	0.745	0.846	1.95511e-12
Lrif1	9.42958e-17	-0.524992	0.142	0.22	2.01472e-12
Tmem14a	9.53258e-17	-0.572946	0.088	0.152	2.03673e-12
Rbm12b2	9.70328e-17	-0.557494	0.095	0.16	2.0732e-12
Cep135	1.01844e-16	-0.379751	0.201	0.3	2.176e-12
Rad54b	1.02109e-16	-0.443003	0.177	0.267	2.18166e-12
Gid4	1.04071e-16	-0.275832	0.356	0.482	2.22359e-12
Jade1	1.04676e-16	-0.273017	0.326	0.444	2.2365e-12
4931406C07Rik	1.07909e-16	-0.46849	0.095	0.16	2.30558e-12
Me2	1.08671e-16	-0.349216	0.296	0.412	2.32187e-12
Crnkl1	1.09168e-16	-0.245032	0.41	0.54	2.33249e-12
Hist1h2bl	1.11291e-16	1.39235	0.114	0.057	2.37785e-12
Dnajb11	1.12316e-16	0.393568	0.626	0.622	2.39974e-12
Shtn1	1.15284e-16	-0.860862	0.044	0.089	2.46315e-12
Thap2	1.15538e-16	-0.28799	0.398	0.53	2.46858e-12
Katnal2	1.17964e-16	-0.593599	0.103	0.171	2.52041e-12
Grin3a	1.20509e-16	-0.481767	0.127	0.203	2.57479e-12
Frat2	1.21188e-16	-0.373626	0.234	0.332	2.5893e-12
Hmgb1	1.24251e-16	-0.107641	0.995	0.995	2.65476e-12
Dock4	1.29699e-16	-0.327986	0.383	0.516	2.77115e-12
Rps16	1.2994e-16	0.104139	0.99	0.985	2.7763e-12
Pigk	1.3215e-16	-0.492564	0.154	0.237	2.82351e-12
Otud1	1.33845e-16	-0.913719	0.025	0.06	2.85974e-12
Ccsap	1.35112e-16	-0.384159	0.19	0.28	2.88681e-12
Dedd	1.35367e-16	-0.362682	0.167	0.257	2.89226e-12
Sub1	1.37663e-16	0.174881	0.952	0.943	2.94131e-12
Zfp503	1.38012e-16	-0.452808	0.161	0.244	2.94876e-12
Ctnnbl1	1.39709e-16	0.391019	0.628	0.619	2.98502e-12
Tram1	1.41274e-16	-0.277393	0.344	0.469	3.01846e-12
Tbc1d5	1.44577e-16	-0.48852	0.126	0.2	3.08904e-12
Prdm8	1.45681e-16	0.797674	0.344	0.287	3.11263e-12
Coro1a	1.56607e-16	1.27074	0.132	0.073	3.34607e-12
Rpia	1.58797e-16	-0.409884	0.164	0.25	3.39285e-12
Zfp398	1.59821e-16	-0.401674	0.181	0.269	3.41473e-12
Rilpl2	1.60105e-16	-0.385082	0.158	0.242	3.42079e-12
2700097O09Rik	1.60119e-16	-0.332968	0.234	0.337	3.42111e-12
Gas6	1.60942e-16	1.62694	0.118	0.061	3.43868e-12
Ptpa	1.61118e-16	-0.274748	0.47	0.593	3.44244e-12
Lifr	1.67871e-16	2.29615	0.06	0.018	3.58673e-12
Nutf2	1.7126e-16	-0.718441	0.048	0.095	3.65913e-12
Fam133b	1.71567e-16	-0.251561	0.647	0.75	3.6657e-12
Tafa5	1.74147e-16	0.775943	0.283	0.216	3.72082e-12
Gosr1	1.74445e-16	-0.371231	0.156	0.24	3.72719e-12
Ttc21b	1.74579e-16	-0.445261	0.144	0.223	3.73006e-12
Angptl6	1.74674e-16	-0.340799	0.206	0.302	3.73208e-12
Poglut2	1.76276e-16	-0.374892	0.219	0.317	3.76632e-12
Snrnp40	1.78201e-16	0.232326	0.85	0.865	3.80744e-12
Gatb	1.93466e-16	-0.546891	0.072	0.129	4.13359e-12
Fancf	1.97693e-16	-0.341059	0.177	0.267	4.22391e-12
Rnf165	2.00086e-16	0.409998	0.606	0.584	4.27503e-12
Zfyve16	2.00653e-16	-0.503506	0.159	0.242	4.28715e-12
Cdk1	2.01281e-16	0.27928	0.725	0.643	4.30057e-12
Bicral	2.07306e-16	-0.464458	0.122	0.195	4.4293e-12
4933421O10Rik	2.0891e-16	-0.603793	0.058	0.109	4.46358e-12
Zfp612	2.11298e-16	-0.484732	0.163	0.246	4.51459e-12
Psip1	2.13318e-16	0.159824	0.975	0.964	4.55775e-12
Ap3b1	2.16023e-16	-0.35512	0.28	0.389	4.61555e-12
Snhg10	2.16704e-16	-0.693528	0.044	0.09	4.63009e-12
Cblb	2.213e-16	-0.361366	0.238	0.342	4.72829e-12
Robo1	2.22037e-16	-0.406997	0.157	0.242	4.74405e-12
Tm9sf4	2.32348e-16	-0.3078	0.421	0.545	4.96436e-12
Irak1bp1	2.34213e-16	0.436743	0.54	0.509	5.0042e-12
Rnf114	2.34976e-16	-0.381525	0.194	0.288	5.02049e-12
Xpnpep3	2.45746e-16	-0.624905	0.052	0.101	5.25061e-12
Dmrtb1	2.49436e-16	-0.686048	0.062	0.115	5.32946e-12
Capza2	2.49918e-16	0.211348	0.871	0.878	5.33974e-12
Mpp5	2.53274e-16	-0.490874	0.142	0.219	5.41144e-12
Rccd1	2.5443e-16	-0.39095	0.145	0.225	5.43616e-12
Zfp369	2.55837e-16	-0.516193	0.075	0.133	5.4662e-12
Stx5a	2.58255e-16	-0.292217	0.339	0.46	5.51787e-12
Plpbp	2.58948e-16	-0.319314	0.299	0.414	5.53268e-12
Prkdc	2.74879e-16	-0.464419	0.114	0.185	5.87307e-12
9530077C05Rik	2.78512e-16	-0.37968	0.196	0.288	5.95069e-12
3110009E18Rik	2.82416e-16	-0.338786	0.207	0.304	6.03411e-12
Mdc1	3.02033e-16	-0.325624	0.384	0.505	6.45324e-12
Dars	3.02991e-16	-0.246503	0.415	0.546	6.47371e-12
Zcchc2	3.06481e-16	-0.593541	0.088	0.149	6.54828e-12
Ap3b2	3.29924e-16	-0.25904	0.433	0.566	7.04915e-12
Nedd8	3.36132e-16	0.150539	0.966	0.966	7.1818e-12
A630072M18Rik	3.3655e-16	-0.507284	0.134	0.21	7.19073e-12
Plod2	3.40177e-16	-0.369796	0.272	0.378	7.26822e-12
Invs	3.45914e-16	-0.648509	0.057	0.107	7.3908e-12
Mpv17	3.45919e-16	-0.375386	0.208	0.302	7.39091e-12
Cklf	3.4966e-16	-0.284996	0.626	0.724	7.47083e-12
Mrpl43	3.60027e-16	0.26859	0.765	0.779	7.69233e-12
Ttc3	3.62427e-16	-0.153995	0.938	0.961	7.74363e-12
Airn	3.705e-16	-0.953974	0.041	0.084	7.91611e-12
Pnpla7	3.72956e-16	-1.097	0.021	0.054	7.96859e-12
Eif6	3.7319e-16	0.279291	0.755	0.762	7.97357e-12
Gm9844	3.75718e-16	-0.449597	0.105	0.172	8.02758e-12
Dpysl2	3.79984e-16	-0.193602	0.768	0.861	8.11874e-12
Canx	3.81064e-16	-0.192844	0.785	0.874	8.14182e-12
Tmem28	3.83993e-16	-0.646352	0.08	0.139	8.2044e-12
Mier1	3.8814e-16	-0.293975	0.487	0.615	8.293e-12
Eci2	3.99274e-16	0.369291	0.641	0.626	8.53088e-12
Rrp1	4.0045e-16	0.211382	0.879	0.892	8.55601e-12
Dnajc2	4.07141e-16	0.279388	0.753	0.758	8.69897e-12
Ogt	4.13961e-16	-0.27774	0.608	0.745	8.8447e-12
Tmem80	4.21642e-16	-0.342367	0.25	0.356	9.0088e-12
Itm2a	4.41766e-16	-0.523118	0.109	0.177	9.43877e-12
Syne2	4.5716e-16	-0.246031	0.709	0.794	9.76768e-12
Crebrf	4.58758e-16	-0.425496	0.151	0.231	9.80182e-12
Adamts6	4.92309e-16	-0.431676	0.193	0.284	1.05187e-11
Pmepa1	4.96832e-16	0.551286	0.385	0.323	1.06153e-11
Taf15	5.1932e-16	-0.215104	0.783	0.862	1.10958e-11
Inppl1	5.21177e-16	-0.313656	0.261	0.367	1.11355e-11
Dpp6	5.31641e-16	-0.744808	0.044	0.088	1.1359e-11
Tmem127	5.61027e-16	-0.420416	0.122	0.195	1.19869e-11
Tead2	5.72372e-16	-0.200267	0.667	0.807	1.22293e-11
Psmd14	5.73034e-16	0.249106	0.796	0.799	1.22434e-11
B230354K17Rik	5.74639e-16	-0.366068	0.203	0.295	1.22777e-11
Cadps	6.15868e-16	-0.199861	0.342	0.465	1.31586e-11
Ino80b	6.17716e-16	-0.324497	0.294	0.407	1.31981e-11
Slc25a4	6.24056e-16	0.128561	0.986	0.975	1.33336e-11
Nim1k	6.46826e-16	-0.962114	0.028	0.065	1.38201e-11
Ubr2	6.47537e-16	-0.358843	0.304	0.417	1.38353e-11
Il11ra1	6.57527e-16	-0.407158	0.156	0.236	1.40487e-11
Tmem143	6.75204e-16	-0.842507	0.054	0.103	1.44264e-11
Cdkal1	7.04871e-16	-0.376396	0.33	0.451	1.50603e-11
Angptl1	7.1539e-16	-1.36109	0.021	0.052	1.5285e-11
Fndc5	7.16219e-16	1.43828	0.105	0.052	1.53027e-11
Ptprn	7.17616e-16	-0.750246	0.034	0.074	1.53326e-11
2810006K23Rik	7.26293e-16	-0.273667	0.367	0.486	1.5518e-11
Brip1	7.50334e-16	-0.446602	0.204	0.299	1.60316e-11
Rprd1a	7.51389e-16	-0.307239	0.289	0.397	1.60542e-11
Nhlrc1	7.79276e-16	-0.960509	0.027	0.062	1.665e-11
Prkcb	7.82546e-16	-0.180149	0.514	0.659	1.67199e-11
Ccdc137	8.1232e-16	-0.490155	0.114	0.184	1.7356e-11
Gm16196	8.5363e-16	-0.595435	0.08	0.139	1.82387e-11
Camk4	8.74297e-16	-0.913669	0.06	0.109	1.86802e-11
Plcb1	8.98698e-16	0.757205	0.33	0.273	1.92016e-11
Rab2b	9.56403e-16	-0.29536	0.243	0.344	2.04345e-11
R3hdm1	9.6002e-16	-0.214947	0.756	0.85	2.05118e-11
Pfdn4	1.02417e-15	0.282927	0.773	0.775	2.18825e-11
Timeless	1.02548e-15	-0.32585	0.407	0.526	2.19103e-11
Nmrk1	1.06524e-15	-0.91082	0.03	0.066	2.276e-11
Extl2	1.0728e-15	-0.389736	0.124	0.196	2.29214e-11
Cct6a	1.10497e-15	0.166036	0.956	0.952	2.36087e-11
Calcoco1	1.11634e-15	-0.420422	0.142	0.22	2.38518e-11
Heca	1.12095e-15	-0.305996	0.281	0.395	2.39503e-11
Heatr5a	1.17052e-15	-0.677987	0.067	0.12	2.50092e-11
Rab36	1.1942e-15	-0.863979	0.035	0.074	2.55153e-11
[truncated: 5,712 more rows]
