# Supplementary material for: PTEN restrains SHH medulloblastoma growth through cell autonomous and nonautonomous mechanisms
Source: eLife. 2026 Apr 17;14:RP108190. doi: 10.7554/eLife.108190 (PMC13090030; doi:10.7554/eLife.108190)
Supplement: Figure 9—source data 2. — Related to Figure 9H. [file elife-108190-fig9-data2.xlsx]

## Sheet: Figure 9-source data 2
Figure 9-source data 2. scRNA-seq differential gene expression analysis in early GC-like (cluster 1) compared with GCP-like (clusters 3, 4, 8) in SmoM2; Ptenfl/fl tumors. Related to Figure 9H.
gene	p_val	avg_log2FC	pct.1	pct.2	p_val_adj
Pclaf	0	-5.86255	0.059	0.874	0
Spc24	0	-5.62586	0.036	0.815	0
Rrm2	0	-5.64793	0.033	0.787	0
Top2a	0	-6.58204	0.041	0.78	0
Mki67	0	-5.92333	0.041	0.774	0
Smc2	0	-4.22979	0.191	0.919	0
Birc5	0	-5.83904	0.041	0.748	0
Ccnd1	0	-5.37706	0.047	0.741	0
Cdk1	0	-5.86812	0.032	0.725	0
Cdca8	0	-5.36225	0.041	0.725	0
Cenpm	0	-4.84259	0.031	0.709	0
Hist1h1b	0	-5.68665	0.1	0.776	0
Smco4	0	-3.94363	0.059	0.724	0
Mcm3	0	-5.65191	0.021	0.685	0
Cenpf	0	-6.00563	0.042	0.703	0
Tyms	0	-4.07221	0.069	0.724	0
Phgdh	0	-4.29113	0.054	0.708	0
Atad2	0	-4.30964	0.055	0.707	0
Tpx2	0	-6.00678	0.03	0.679	0
Ccna2	0	-5.83053	0.02	0.669	0
Pbk	0	-5.922	0.017	0.658	0
Cks1b	0	-2.91578	0.255	0.894	0
Knl1	0	-6.21373	0.013	0.644	0
Cks2	0	-4.35412	0.139	0.767	0
Uhrf1	0	-5.02545	0.025	0.653	0
Mcm6	0	-5.56397	0.021	0.648	0
Hirip3	0	-2.81092	0.17	0.794	0
Dnajc9	0	-2.59805	0.271	0.893	0
Smc4	0	-3.32473	0.221	0.839	0
Fbxo5	0	-5.34004	0.023	0.637	0
Tipin	0	-2.58452	0.188	0.8	0
Cdca3	0	-5.53798	0.022	0.634	0
Esco2	0	-6.57411	0.009	0.621	0
Usp1	0	-2.50463	0.202	0.813	0
Prc1	0	-5.70333	0.03	0.639	0
Hist1h2ap	0	-5.31889	0.123	0.725	0
Draxin	0	-2.48436	0.179	0.779	0
Nusap1	0	-5.93007	0.024	0.622	0
Rad51ap1	0	-4.50107	0.035	0.632	0
Prim1	0	-3.54396	0.066	0.66	0
Hjurp	0	-2.65988	0.171	0.764	0
Clspn	0	-5.99749	0.011	0.601	0
Csrp2	0	-2.68289	0.116	0.706	0
Rrm1	0	-2.71759	0.151	0.74	0
Aurkb	0	-6.1633	0.011	0.597	0
Kif11	0	-6.42571	0.011	0.596	0
Spc25	0	-5.67646	0.02	0.602	0
Rfc4	0	-2.26064	0.224	0.802	0
Gmnn	0	-4.83156	0.02	0.598	0
Mxd3	0	-4.49025	0.033	0.61	0
Ube2c	0	-5.20387	0.091	0.666	0
Kif15	0	-5.86639	0.012	0.584	0
Hes6	0	-2.75134	0.138	0.709	0
Mcm7	0	-2.05978	0.305	0.875	0
Hells	0	-4.09243	0.047	0.614	0
Ncor2	0	-2.32052	0.183	0.745	0
Mcm5	0	-4.07457	0.038	0.599	0
Pmf1	0	-4.34984	0.029	0.587	0
Topbp1	0	-2.38378	0.145	0.702	0
Cadm1	0	-2.03152	0.212	0.767	0
Pcna	0	-2.69199	0.29	0.842	0
H2afx	0	-3.43298	0.258	0.81	0
Incenp	0	-4.13661	0.045	0.597	0
Hist1h2ae	0	-4.47301	0.116	0.667	0
Cklf	0	-3.10825	0.078	0.626	0
Psmc3ip	0	-2.97371	0.088	0.635	0
Cenpa	0	-5.63768	0.044	0.591	0
Dek	0	-2.75075	0.405	0.95	0
Mns1	0	-4.12907	0.035	0.576	0
Hat1	0	-2.64703	0.12	0.66	0
Ckap2l	0	-5.52823	0.014	0.549	0
Cdca7	0	-3.82753	0.041	0.573	0
Ccnb1	0	-5.86785	0.019	0.55	0
Hmgb2	0	-4.5677	0.447	0.978	0
Cenpe	0	-5.92277	0.018	0.547	0
Lrig3	0	-3.18766	0.077	0.605	0
Mis18bp1	0	-5.51098	0.018	0.546	0
Siva1	0	-2.12975	0.307	0.834	0
Cenpk	0	-3.93219	0.032	0.558	0
Lig1	0	-3.07843	0.09	0.615	0
Plk4	0	-3.7839	0.038	0.562	0
Hmmr	0	-6.09884	0.013	0.532	0
Dut	0	-2.62297	0.424	0.939	0
Sgo2a	0	-5.41681	0.015	0.529	0
Slbp	0	-2.1986	0.235	0.749	0
Ptbp1	0	-1.74786	0.234	0.745	0
Tacc3	0	-4.28814	0.033	0.543	0
Mcm2	0	-3.57888	0.052	0.562	0
Impdh2	0	-1.72434	0.267	0.777	0
Gsg1l	0	-5.29167	0.015	0.523	0
Hmgn5	0	-2.23383	0.128	0.636	0
Dtl	0	-4.10443	0.03	0.536	0
Ncapg	0	-6.30996	0.007	0.513	0
Dnmt1	0	-1.97439	0.265	0.771	0
Rif1	0	-1.89307	0.208	0.713	0
Gnai2	0	-2.11845	0.37	0.875	0
Dbf4	0	-3.15869	0.074	0.577	0
Shcbp1	0	-5.48201	0.012	0.515	0
Nuf2	0	-5.70332	0.009	0.51	0
Pqlc1	0	-2.48959	0.138	0.638	0
Idh2	0	-1.71236	0.327	0.827	0
Hist1h1d	0	-3.85166	0.044	0.542	0
Ccdc34	0	-1.92554	0.351	0.849	0
Dctpp1	0	-1.90393	0.399	0.897	0
Cenpq	0	-3.76688	0.037	0.532	0
Prdx4	0	-1.70559	0.338	0.833	0
Nop58	0	-1.64718	0.327	0.821	0
Kif23	0	-5.36555	0.016	0.508	0
Dkc1	0	-1.82421	0.194	0.684	0
Mad2l1	0	-3.78333	0.036	0.524	0
Stmn4	0	2.66406	0.831	0.343	0
Aspm	0	-6.16769	0.009	0.496	0
Knstrn	0	-4.94843	0.019	0.506	0
Paics	0	-1.76242	0.342	0.827	0
Cdc20	0	-5.25217	0.029	0.513	0
Dpysl3	0	3.09329	0.843	0.359	0
Lyar	0	-1.57081	0.302	0.784	0
Pim1	0	-2.73986	0.084	0.565	0
Tmpo	0	-2.44016	0.475	0.954	0
Isoc1	0	-2.2688	0.115	0.593	0
Kif22	0	-3.85962	0.041	0.518	0
Rpa2	0	-3.51143	0.047	0.523	0
Racgap1	0	-1.99182	0.231	0.707	0
Kif4	0	-6.11826	0.007	0.482	0
Ckap2	0	-4.63099	0.02	0.494	0
Lockd	0	-2.7767	0.094	0.567	0
Sgo1	0	-4.6509	0.022	0.495	0
Nop56	0	-1.54121	0.389	0.861	0
Cdk6	0	-1.62204	0.42	0.891	0
Rbbp7	0	-1.58706	0.322	0.793	0
Prdx1	0	-1.90829	0.474	0.945	0
Dhfr	0	-3.41182	0.048	0.518	0
Kif20b	0	-4.54475	0.023	0.493	0
Wee1	0	-4.46496	0.02	0.489	0
Mthfd2	0	-2.718	0.104	0.572	0
Ccnb2	0	-5.64834	0.012	0.48	0
Cenpp	0	-4.30094	0.022	0.49	0
Ppil1	0	-2.07225	0.126	0.593	0
Mcm4	0	-3.09701	0.073	0.539	0
Ezr	0	-1.50807	0.287	0.753	0
Gpr153	0	-5.65271	0.01	0.476	0
Dnph1	0	-3.03265	0.056	0.521	0
Melk	0	-6.03438	0.005	0.469	0
Gar1	0	-1.51765	0.226	0.686	0
Exosc8	0	-1.39484	0.284	0.743	0
Tex30	0	-1.66804	0.189	0.647	0
Necab3	0	2.93677	0.698	0.24	0
Bub1	0	-6.15107	0.007	0.463	0
Lap3	0	-1.82947	0.279	0.735	0
Cdc45	0	-4.97227	0.014	0.47	0
Tead2	0	-1.64372	0.212	0.667	0
Nudcd2	0	-1.47991	0.331	0.785	0
Lbr	0	-1.73912	0.174	0.627	0
Fen1	0	-2.75245	0.076	0.528	0
Pdgfa	0	-4.40281	0.027	0.478	0
Rfc5	0	-2.32407	0.099	0.549	0
Ect2	0	-5.30704	0.011	0.46	0
Nde1	0	-3.3976	0.045	0.494	0
Cntn2	0	2.6025	0.973	0.525	0
Anp32b	0	-2.69297	0.53	0.978	0
Clic4	0	-1.56022	0.246	0.693	0
Ndc80	0	-6.20911	0.005	0.45	0
Hpca	0	-2.37497	0.188	0.631	0
Trim59	0	-2.00856	0.179	0.62	0
Arhgap11a	0	-4.45321	0.026	0.466	0
Rfc2	0	-1.47586	0.282	0.722	0
Rad21	0	-1.69171	0.312	0.751	0
Lsm5	0	-1.41223	0.404	0.843	0
Hist1h1e	0	-2.35576	0.307	0.745	0
Ier5	0	-1.48542	0.298	0.735	0
Slc3a2	0	-1.52201	0.352	0.787	0
Timm8a1	0	-1.51642	0.233	0.668	0
Tfdp1	0	-1.46238	0.261	0.696	0
Ptch1	0	-1.75448	0.352	0.786	0
Rab3a	0	2.39392	0.892	0.458	0
Cdca2	0	-7.01128	0.004	0.438	0
Naa50	0	-1.34104	0.34	0.774	0
Chaf1a	0	-3.385	0.044	0.478	0
Apc2	0	2.89378	0.602	0.168	0
Nmral1	0	-2.01386	0.114	0.546	0
Ncapd3	0	-1.64243	0.18	0.612	0
Chaf1b	0	-3.7641	0.033	0.464	0
Sae1	0	-1.39605	0.422	0.853	0
Cenpw	0	-2.99892	0.051	0.48	0
Sfrp1	0	-1.75279	0.448	0.875	0
Dlgap5	0	-6.58313	0.005	0.432	0
Nhlh1	0	2.44087	0.793	0.37	0
Bub1b	0	-5.77029	0.008	0.431	0
Nsmce4a	0	-1.29878	0.431	0.854	0
Pdlim3	0	-5.0625	0.03	0.452	0
Gng3	0	2.60173	0.837	0.415	0
Nxt1	0	-1.65865	0.162	0.584	0
Tk1	0	-6.57565	0.004	0.425	0
Plk1	0	-5.61411	0.009	0.429	0
Ipo5	0	-1.60715	0.18	0.6	0
Trp53	0	-1.14094	0.377	0.796	0
Pimreg	0	-3.45501	0.058	0.475	0
Aurka	0	-4.55315	0.021	0.437	0
Ncapd2	0	-1.87389	0.143	0.558	0
Hsd11b2	0	-2.44478	0.089	0.504	0
Homer2	0	-1.54064	0.183	0.598	0
Ddx39	0	-1.18706	0.308	0.723	0
Gnl3	0	-1.41175	0.242	0.656	0
Brca1	0	-4.73033	0.014	0.428	0
Dtymk	0	-1.56003	0.513	0.926	0
Cnih2	0	2.7944	0.661	0.248	0
Ak2	0	-1.14112	0.294	0.707	0
Aplp1	0	2.44164	0.706	0.293	0
Hk2	0	-1.92021	0.147	0.559	0
Eif4ebp1	0	-5.02575	0.015	0.427	0
Mphosph10	0	-1.3447	0.217	0.628	0
Chgb	0	2.38743	0.699	0.288	0
Anln	0	-5.82915	0.006	0.417	0
Vars	0	-1.52843	0.171	0.582	0
Bok	0	-1.2306	0.45	0.86	0
Grin2b	0	2.82505	0.601	0.191	0
Ncaph	0	-3.78649	0.025	0.434	0
Kif2c	0	-6.14714	0.006	0.415	0
Ska1	0	-5.7186	0.006	0.415	0
Ctps	0	-1.28368	0.222	0.63	0
Rpa3	0	-1.13717	0.336	0.744	0
Mpp6	0	-1.10723	0.342	0.75	0
Suz12	0	-1.25397	0.262	0.669	0
Pvalb	0	-2.43311	0.124	0.531	0
Odc1	0	-1.27709	0.489	0.895	0
Tpm4	0	-1.20759	0.476	0.881	0
Adk	0	-1.47102	0.197	0.602	0
Myod1	0	-5.93197	0.008	0.412	0
Hist1h1c	0	-2.67165	0.071	0.474	0
Cip2a	0	-4.51479	0.017	0.419	0
Anp32e	0	-1.84344	0.532	0.933	0
Pttg1	0	-2.6355	0.092	0.492	0
Gjc1	0	-1.35058	0.206	0.606	0
Cenph	0	-4.18981	0.019	0.419	0
Tuba1b	0	-2.27877	0.557	0.957	0
Fam210b	0	-1.39899	0.214	0.613	0
Ssrp1	0	-1.2339	0.478	0.876	0
Cbfa2t3	0	-1.50997	0.237	0.635	0
Ncapg2	0	-4.15834	0.021	0.419	0
Cenps	0	-2.85434	0.049	0.446	0
Dnajc21	0	-1.23249	0.322	0.719	0
Cmc2	0	-1.59634	0.166	0.561	0
Ube2t	0	-3.55988	0.03	0.424	0
Psat1	0	-1.18296	0.363	0.757	0
Tnfaip8	0	-4.06207	0.023	0.417	0
Skp2	0	-2.72806	0.053	0.446	0
Rad51	0	-4.18079	0.019	0.411	0
Gas1	0	-5.82733	0.007	0.397	0
Pa2g4	0	-1.23918	0.496	0.884	0
Tex14	0	2.58506	0.636	0.248	0
Eef1d	0	-1.43237	0.51	0.898	0
Foxm1	0	-4.5681	0.015	0.401	0
Hist1h1a	0	-5.25675	0.011	0.397	0
Cbfb	0	-1.76135	0.123	0.508	0
Rassf3	0	-1.66968	0.132	0.517	0
Smc6	0	-1.231	0.477	0.862	0
Myt1l	0	2.84598	0.564	0.179	0
Cdh20	0	-2.70282	0.057	0.441	0
Mdk	0	-1.29585	0.386	0.77	0
Sept8	0	-2.61329	0.07	0.454	0
Kif18a	0	-4.28708	0.02	0.402	0
Lsm8	0	-1.16214	0.487	0.869	0
Sox9	0	-2.23714	0.09	0.472	0
Scaf11	0	-1.05805	0.445	0.826	0
Ubr7	0	-1.89853	0.111	0.491	0
Cdk5rap2	0	-1.51787	0.169	0.548	0
Rfc3	0	-1.60557	0.162	0.541	0
Ybx3	0	-1.34583	0.523	0.902	0
Cit	0	-4.52129	0.015	0.393	0
Rnaseh2a	0	-1.62283	0.155	0.532	0
Pdlim4	0	-5.77392	0.007	0.384	0
Boc	0	-2.89516	0.05	0.426	0
Nup62	0	-1.56124	0.147	0.522	0
Srebf1	0	-3.48938	0.035	0.409	0
Msn	0	-2.5927	0.06	0.433	0
Rangap1	0	-1.34999	0.288	0.659	0
Rcc1	0	-1.97836	0.097	0.467	0
Asns	0	-1.67024	0.236	0.604	0
Slc7a5	0	-3.5128	0.029	0.397	0
Ctnnb1	0	-1.09201	0.516	0.883	0
Cdkn1c	0	-2.0668	0.102	0.468	0
Hist1h4d	0	-2.80425	0.055	0.421	0
Pold2	0	-1.79375	0.104	0.469	0
Fignl1	0	-3.47834	0.026	0.391	0
Ppat	0	-1.94154	0.097	0.461	0
Lsm3	0	-1.00286	0.472	0.836	0
Nin	0	-1.82687	0.105	0.469	0
Bora	0	-3.41725	0.036	0.399	0
Ska2	0	-1.90094	0.115	0.478	0
Hpf1	0	-1.02621	0.444	0.806	0
Cdkn1a	0	-2.46106	0.041	0.403	0
Timeless	0	-2.84357	0.045	0.407	0
Shmt1	0	-4.46351	0.013	0.375	0
Neil3	0	-5.31596	0.008	0.368	0
Fam111a	0	-5.45187	0.007	0.367	0
Slc7a1	0	-2.28435	0.088	0.446	0
Gli1	0	-4.96911	0.01	0.367	0
Spdl1	0	-4.93811	0.01	0.367	0
Prim2	0	-2.11264	0.087	0.443	0
Snhg1	0	-0.991169	0.526	0.882	0
Samd12	0	2.61326	0.523	0.168	0
Lsm2	0	-1.15276	0.512	0.867	0
Atad5	0	-2.72765	0.051	0.405	0
Dock1	0	-3.72968	0.023	0.377	0
Tnik	0	2.27299	0.683	0.33	0
Gadd45g	0	-2.60838	0.075	0.428	0
Tst	0	-3.5855	0.025	0.378	0
Sept4	0	2.03966	0.733	0.381	0
Mllt11	0	2.19218	0.877	0.526	0
Ezh2	0	-1.20602	0.538	0.889	0
Cenpn	0	-4.82811	0.01	0.361	0
Nasp	0	-2.02691	0.63	0.979	0
Trip13	0	-3.07629	0.03	0.379	0
Fbl	0	-0.983001	0.501	0.849	0
Pdzrn3	0	2.3786	0.559	0.212	0
E2f8	0	-6.44073	0.003	0.35	0
Pold3	0	-1.97429	0.09	0.436	0
Grb10	0	-3.88175	0.024	0.37	0
Supt16	0	-1.15206	0.57	0.915	0
Rad18	0	-2.40218	0.06	0.405	0
Rbp4	0	-5.20964	0.01	0.355	0
Brca2	0	-2.83638	0.039	0.382	0
Prmt8	0	-2.103	0.089	0.432	0
Cenpu	0	-3.01696	0.035	0.377	0
Stk17b	0	-3.13752	0.034	0.375	0
Psrc1	0	-4.40728	0.019	0.36	0
Scrt1	0	2.06865	0.727	0.386	0
Gins2	0	-2.35342	0.065	0.405	0
Rcc2	0	-0.896315	0.543	0.883	0
Rnaseh2c	0	-1.10235	0.56	0.9	0
Gpm6a	0	1.98382	0.889	0.55	0
Spag5	0	-5.19045	0.006	0.345	0
Zfp36l1	0	-6.65047	0.005	0.343	0
Kitl	0	-3.53816	0.028	0.366	0
Nhp2	0	-1.02355	0.52	0.858	0
Adamts1	0	-3.01289	0.043	0.38	0
Cmtm4	0	-1.99926	0.08	0.417	0
Nup37	0	-2.29588	0.067	0.403	0
Scrt2	0	2.40151	0.577	0.241	0
Sfrp2	0	-5.23595	0.008	0.344	0
Cep55	0	-6.0967	0.004	0.339	0
Mms22l	0	-3.31692	0.03	0.365	0
A330076H08Rik	0	2.08453	0.77	0.436	0
Syce2	0	-2.97877	0.037	0.371	0
Kdm5b	0	2.02039	0.688	0.354	0
Ppic	0	-2.06361	0.088	0.422	0
Lmnb1	0	-1.62998	0.6	0.933	0
Mdc1	0	-2.51628	0.051	0.384	0
Exo1	0	-5.59141	0.004	0.336	0
Pola1	0	-2.90261	0.039	0.37	0
Sox1	0	-2.28342	0.064	0.394	0
Nek2	0	-5.30031	0.007	0.336	0
Cdt1	0	-3.59305	0.026	0.355	0
Kif20a	0	-6.38513	0.003	0.331	0
Mir124a-1hg	0	2.21173	0.616	0.289	0
Ppp2r2b	0	2.3112	0.613	0.286	0
Elavl4	0	1.99563	0.824	0.497	0
Mvd	0	2.35619	0.572	0.245	0
Lsm6	0	-1.19165	0.599	0.925	0
1700001O22Rik	0	-2.18919	0.067	0.393	0
Gas2l3	0	-5.61402	0.006	0.332	0
Chrna3	0	2.6034	0.463	0.138	0
Ccnf	0	-4.71303	0.011	0.336	0
Wdr76	0	-3.02504	0.035	0.36	0
Cep192	0	-2.20925	0.067	0.391	0
Alyref	0	-1.3082	0.611	0.934	0
Diaph3	0	-5.72304	0.005	0.328	0
Plppr1	0	2.21801	0.543	0.222	0
Cbx5	0	-1.1318	0.602	0.922	0
Tubb2a	0	2.52558	0.926	0.607	0
Sez6l2	0	2.86185	0.438	0.119	0
Gap43	0	2.67253	0.967	0.649	0
Lrr1	0	-5.38705	0.006	0.323	0
Abcb9	0	-3.08405	0.031	0.348	0
Sapcd2	0	-3.9543	0.021	0.337	0
Plppr3	0	2.24101	0.537	0.222	0
Asf1b	0	-5.54385	0.005	0.32	0
Srsf10	0	-0.92551	0.597	0.909	0
Cdv3	0	-0.91591	0.569	0.881	0
St18	0	1.91358	0.718	0.406	0
Hmgn2	0	-2.6624	0.679	0.989	0
Myt1	0	2.22562	0.526	0.218	0
Kifc1	0	-4.55443	0.01	0.318	0
Gng5	0	-1.17484	0.627	0.934	0
Kif5a	0	2.26745	0.531	0.225	0
Atoh1	0	-3.78186	0.02	0.326	0
Pabpc1	0	-1.20688	0.637	0.943	0
Actl6b	0	2.43795	0.49	0.185	0
Celf3	0	2.34531	0.51	0.206	0
Kpna2	0	-3.17366	0.038	0.342	0
Cd82	0	-4.8469	0.009	0.313	0
Depdc1a	0	-6.82234	0.002	0.306	0
Nrn1	0	1.94186	0.694	0.39	0
Dbi	0	-1.13764	0.591	0.893	0
Chek1	0	-4.39929	0.011	0.313	0
Chtf18	0	-2.99275	0.029	0.331	0
Nudt21	0	-0.83742	0.591	0.892	0
Ttk	0	-5.60884	0.005	0.306	0
Selenoh	0	-1.81802	0.663	0.964	0
Apbb1	0	1.98262	0.703	0.402	0
Sema6a	0	1.95894	0.799	0.499	0
Jade1	0	-3.21906	0.028	0.326	0
Ccdc18	0	-3.40429	0.024	0.322	0
Trpc4ap	0	1.98039	0.777	0.481	0
Ung	0	-4.20989	0.019	0.315	0
Cavin3	0	-3.29647	0.029	0.324	0
Hhip	0	-6.08657	0.004	0.298	0
Cdk2	0	-4.24544	0.012	0.305	0
Cdca5	0	-5.22522	0.006	0.299	0
Kif21b	0	1.87327	0.634	0.343	0
Tubb4a	0	2.15188	0.516	0.226	0
Ticrr	0	-5.3428	0.006	0.296	0
Hist3h2a	0	2.11887	0.621	0.331	0
Zfp367	0	-3.95546	0.014	0.304	0
Nucks1	0	-1.50401	0.657	0.947	0
6330403K07Rik	0	2.0683	0.573	0.284	0
Chek2	0	-4.61915	0.009	0.297	0
Elmo1	0	2.80141	0.421	0.133	0
Ldhb	0	1.99416	0.838	0.551	0
Celf4	0	1.94585	0.815	0.529	0
Mcm10	0	-5.04455	0.006	0.291	0
Bub3	0	-1.11877	0.561	0.845	0
Dner	0	2.16175	0.551	0.268	0
Gm29521	0	4.17368	0.326	0.043	0
Srgap3	0	2.55007	0.423	0.142	0
Pcsk1n	0	3.03533	0.409	0.128	0
Cadm3	0	2.08992	0.54	0.26	0
Rgma	0	-4.06925	0.014	0.291	0
Plcb1	0	1.89482	0.605	0.33	0
G3bp1	0	-1.12301	0.671	0.946	0
Srcin1	0	2.0862	0.506	0.232	0
Smc1a	0	-0.854521	0.627	0.901	0
Dscc1	0	-4.59431	0.01	0.284	0
Grina	0	2.18066	0.494	0.221	0
Hes1	0	-6.28482	0.005	0.278	0
Ankle1	0	-6.5123	0.002	0.271	0
Ppm1h	0	2.86561	0.37	0.101	0
4631405J19Rik	0	-5.77262	0.004	0.272	0
Thra	0	1.97146	0.674	0.406	0
Pak7	0	2.10206	0.487	0.22	0
Mgst3	0	2.05701	0.607	0.34	0
Shf	0	1.52563	0.847	0.581	0
Itsn1	0	1.89606	0.798	0.532	0
Txn1	0	-1.01502	0.679	0.945	0
Mmp24	0	2.36857	0.417	0.152	0
Nudc	0	-0.997651	0.676	0.941	0
Rab6b	0	1.8125	0.807	0.543	0
Nav2	0	1.66345	0.885	0.623	0
Ncan	0	2.40897	0.413	0.151	0
Ina	0	2.08156	0.949	0.687	0
Tubb4b	0	-1.54526	0.619	0.88	0
Kidins220	0	1.96313	0.552	0.292	0
Cenpv	0	-0.797006	0.672	0.931	0
Banf1	0	-0.855351	0.667	0.926	0
H1fx	0	-1.28166	0.658	0.916	0
Nrxn1	0	1.74902	0.894	0.636	0
Clvs1	0	1.84933	0.533	0.276	0
Srsf9	0	-0.77359	0.662	0.919	0
Tagln3	0	1.68955	0.862	0.611	0
Hdgf	0	-1.28471	0.714	0.962	0
Cnbp	0	-0.994821	0.7	0.948	0
L1cam	0	2.96271	0.333	0.086	0
Clmp	0	1.55406	0.789	0.542	0
Sobp	0	1.75225	0.781	0.538	0
Cdk5r1	0	1.69243	0.767	0.526	0
Fkbp3	0	-1.08004	0.716	0.954	0
Dcx	0	2.02183	0.929	0.692	0
Bhlhe22	0	1.77174	0.631	0.395	0
Hmgcs1	0	2.04325	0.823	0.587	0
Ankrd12	0	1.7454	0.627	0.392	0
Idh1	0	1.71604	0.608	0.377	0
Dlgap4	0	1.6356	0.613	0.384	0
Prkcb	0	1.48119	0.743	0.514	0
Neurod1	0	2.25354	0.958	0.73	0
Hspe1	0	-0.818112	0.702	0.924	0
Map2	0	1.89655	0.936	0.715	0
Btbd17	0	1.59457	0.791	0.571	0
Pnoc	0	4.99283	0.24	0.022	0
Dbn1	0	1.62426	0.868	0.65	0
Uchl1	0	1.6182	0.768	0.553	0
Gm10076	0	-0.949903	0.73	0.945	0
Nrep	0	1.74512	0.876	0.662	0
Ptges3	0	-0.873475	0.734	0.944	0
Nhlh2	0	1.61316	0.885	0.676	0
Hspd1	0	-0.991688	0.745	0.953	0
Sbk1	0	1.60305	0.629	0.424	0
Stmn2	0	2.52092	0.993	0.792	0
Ranbp1	0	-1.71675	0.783	0.977	0
Uncx	0	1.33984	0.837	0.645	0
Aldoa	0	1.44339	0.778	0.587	0
Scg5	0	1.42403	0.846	0.655	0
Kif5c	0	1.59226	0.913	0.726	0
Klf7	0	1.48	0.788	0.602	0
Npdc1	0	1.56554	0.708	0.522	0
Snrpf	0	-0.971598	0.782	0.967	0
Mapk8ip1	0	1.40555	0.683	0.501	0
Nap1l1	0	-1.27072	0.794	0.974	0
Gnao1	0	1.47232	0.717	0.538	0
Gdi1	0	1.4481	0.691	0.513	0
Srrm4	0	1.4051	0.702	0.526	0
Rps27l	0	-0.797532	0.782	0.956	0
Hnrnpf	0	-1.29413	0.805	0.978	0
Ppp1r14c	0	1.85526	0.919	0.747	0
Sept3	0	1.64927	0.889	0.717	0
Klc1	0	1.4619	0.814	0.645	0
Srsf2	0	-0.749419	0.803	0.969	0
Hist3h2ba	0	1.6703	0.896	0.732	0
Mtss1	0	1.56656	0.726	0.568	0
Mif	0	-0.967182	0.807	0.962	0
Syt11	0	1.27941	0.883	0.729	0
Tmeff1	0	1.34137	0.717	0.563	0
Apc	0	1.45766	0.909	0.757	0
Rbfox2	0	1.33059	0.826	0.676	0
Rufy3	0	1.35669	0.867	0.718	0
Ank2	0	1.48128	0.775	0.628	0
Nsg1	0	1.54766	0.934	0.792	0
Snrpb	0	-0.782219	0.835	0.972	0
Rpl22l1	0	-0.86101	0.833	0.967	0
Ube2s	0	-1.41582	0.841	0.968	0
Ncl	0	-1.18733	0.857	0.983	0
Elavl3	0	1.39464	0.963	0.837	0
Ank3	0	1.43595	0.955	0.829	0
Snrpd1	0	-0.927721	0.849	0.974	0
Cbx3	0	-0.660125	0.848	0.97	0
Cpe	0	1.17008	0.78	0.659	0
Gng2	0	1.26295	0.794	0.673	0
Cacna2d1	0	1.24268	0.859	0.74	0
Pfn1	0	-0.621819	0.846	0.965	0
Tubb3	0	2.61062	0.995	0.879	0
Rpl36a	0	-0.881356	0.861	0.975	0
Kif1b	0	1.25249	0.903	0.792	0
Psip1	0	-0.713169	0.865	0.975	0
Pfn2	0	1.14583	0.768	0.661	0
Srsf7	0	-0.998334	0.884	0.99	0
Snrpg	0	-0.883072	0.875	0.978	0
Ywhag	0	1.18941	0.776	0.674	0
Ran	0	-1.82227	0.89	0.989	0
Atp6v0b	0	1.18323	0.917	0.822	0
Podxl2	0	1.39283	0.952	0.86	0
Ebf1	0	1.12835	0.953	0.861	0
H2afv	0	-1.59495	0.898	0.988	0
Ctxn1	0	1.11046	0.788	0.701	0
Hnrnpd	0	-0.838292	0.892	0.979	0
Map1b	0	1.85356	0.994	0.908	0
Rpl12	0	-0.973606	0.892	0.977	0
Rps15	0	-0.637427	0.894	0.979	0
Elavl2	0	1.05909	0.85	0.769	0
Nsg2	0	1.07967	0.82	0.739	0
Ndfip1	0	1.1878	0.89	0.809	0
Hnrnpa3	0	-0.68059	0.904	0.984	0
Mrfap1	0	-0.654314	0.908	0.981	0
Rpl4	0	-0.747985	0.907	0.98	0
Myl12b	0	1.15393	0.875	0.803	0
Pax6	0	0.902153	0.882	0.812	0
Rps17	0	-0.70198	0.909	0.979	0
Atp5g2	0	-0.874331	0.914	0.984	0
Hnrnpu	0	-0.734722	0.919	0.987	0
Itm2b	0	1.78455	0.985	0.917	0
Ptprs	0	1.24636	0.987	0.92	0
Rpl22	0	-0.847923	0.918	0.983	0
Dpysl2	0	1.04877	0.832	0.768	0
Tsc22d1	0	0.930026	0.859	0.797	0
Rpl13a	0	-0.765039	0.923	0.983	0
Zbtb18	0	1.10538	0.885	0.827	0
Rps6	0	-0.699916	0.924	0.982	0
BC031181	0	1.04108	0.842	0.784	0
Serbp1	0	-0.84538	0.934	0.988	0
Rnasek	0	1.03045	0.884	0.831	0
Rps25	0	-0.708794	0.924	0.977	0
Rps12	0	-0.920309	0.928	0.981	0
H2afy	0	-0.531055	0.931	0.983	0
Gm1673	0	0.856452	0.932	0.881	0
Gapdh	0	-0.731959	0.937	0.987	0
App	0	0.900141	0.917	0.868	0
Hnrnpab	0	-0.529615	0.934	0.983	0
Hmgn1	0	-0.760472	0.935	0.984	0
Rack1	0	-0.564788	0.938	0.985	0
Gsk3b	0	1.00409	0.935	0.89	0
Rpl14	0	-0.980573	0.943	0.986	0
Hint1	0	-0.695075	0.945	0.987	0
Eef1b2	0	-0.694971	0.946	0.986	0
Map1lc3a	0	1.04208	0.892	0.852	0
Rtn4	0	1.04508	0.949	0.91	0
Map1lc3b	0	1.02395	0.886	0.849	0
Rplp1	0	-0.915258	0.951	0.987	0
Rbm3	0	-0.947131	0.955	0.991	0
Rps21	0	-0.505272	0.954	0.989	0
Rplp2	0	-0.700561	0.951	0.985	0
Rpl17	0	-0.547739	0.951	0.985	0
Set	0	-0.718115	0.954	0.987	0
Rps27	0	-0.508947	0.953	0.986	0
Dctn2	0	0.903644	0.854	0.821	0
Nme2	0	-0.745838	0.955	0.988	0
Npm1	0	-1.58921	0.961	0.993	0
Sox4	0	0.876855	0.963	0.931	0
Celf2	0	1.23311	0.977	0.946	0
Rpl35a	0	-0.625329	0.954	0.985	0
Rpl36	0	-0.50247	0.957	0.987	0
Eif5a	0	-0.590317	0.958	0.987	0
Nnat	0	1.27131	0.98	0.952	0
Igfbpl1	0	1.1815	0.99	0.963	0
Rps26	0	-0.825906	0.96	0.987	0
Rtn1	0	2.09907	0.998	0.971	0
Rps18	0	-0.907593	0.965	0.992	0
Atp6v0c	0	0.992559	0.949	0.922	0
Hmgb1	0	-1.32747	0.97	0.995	0
Rps28	0	-0.547153	0.962	0.987	0
Stmn3	0	1.26774	0.982	0.958	0
Dctn3	0	0.899426	0.868	0.844	0
Ttc3	0	0.930949	0.962	0.938	0
Rpl10a	0	-0.7633	0.966	0.99	0
Selenok	0	1.02003	0.956	0.932	0
Rps19	0	-0.934571	0.968	0.991	0
H2afz	0	-2.24732	0.976	0.998	0
Rps2	0	-0.961574	0.968	0.99	0
Rps16	0	-0.872646	0.969	0.99	0
Ddah2	0	1.13115	0.989	0.968	0
Rps14	0	-0.431252	0.967	0.988	0
Rpl39	0	-0.624192	0.967	0.988	0
Rpl37a	0	-0.448296	0.969	0.989	0
Rpl21	0	-0.575171	0.971	0.991	0
Rpl28	0	-0.672132	0.973	0.993	0
Rps15a	0	-0.666827	0.971	0.991	0
Rpl37	0	-0.442361	0.968	0.988	0
Ybx1	0	-0.651641	0.972	0.99	0
Rpl32	0	-0.742151	0.974	0.992	0
Rps20	0	-0.870883	0.976	0.993	0
Rpl6	0	-0.527782	0.976	0.993	0
Eid1	0	0.859277	0.905	0.889	0
Rpl27a	0	-0.623973	0.979	0.995	0
Ptms	0	0.896054	0.976	0.961	0
Rps13	0	-0.564187	0.977	0.992	0
Rpl41	0	-0.799471	0.979	0.994	0
Jpt1	0	0.684622	0.982	0.967	0
Rps7	0	-0.474173	0.977	0.992	0
Rps29	0	-0.607579	0.979	0.994	0
Rps23	0	-0.683167	0.975	0.99	0
Rps10	0	-0.674755	0.976	0.991	0
Rpl18	0	-0.856174	0.98	0.994	0
Zic1	0	1.00856	0.988	0.974	0
Naca	0	-0.545017	0.975	0.989	0
Gabarap	0	0.943518	0.924	0.91	0
Rps11	0	-0.595155	0.979	0.992	0
Sox11	0	1.28039	0.993	0.98	0
Rpl30	0	-0.599206	0.981	0.994	0
Rpl24	0	-0.4868	0.977	0.99	0
Rps3	0	-0.395507	0.983	0.995	0
Rpsa	0	-0.962617	0.983	0.995	0
Rpl8	0	-0.708489	0.983	0.995	0
Rpl3	0	-0.868274	0.981	0.993	0
Fau	0	-0.494533	0.981	0.993	0
Rps3a1	0	-0.758546	0.983	0.994	0
Atpif1	0	0.521708	0.974	0.985	0
Rplp0	0	-0.718912	0.983	0.994	0
Rps9	0	-0.429533	0.983	0.994	0
Tubb2b	0	2.11161	0.998	0.987	0
Srsf3	0	-0.477785	0.983	0.994	0
Rpl9	0	-0.549323	0.984	0.994	0
Rpl18a	0	-0.411556	0.985	0.995	0
Rpl23	0	-0.630664	0.983	0.993	0
Tpt1	0	-0.45405	0.986	0.996	0
Rps4x	0	-0.703125	0.983	0.993	0
Rps8	0	-0.659206	0.985	0.994	0
Rps5	0	-0.609673	0.985	0.994	0
Rps27a	0	-0.823366	0.985	0.994	0
Rpl15	0	-0.551848	0.986	0.995	0
Rps24	0	-0.513035	0.986	0.995	0
Myl6	0	0.94491	0.959	0.952	0
Rpl11	0	-0.431302	0.988	0.994	0
Calm3	0	0.680743	0.961	0.955	0
Rpl13	0	-0.676541	0.991	0.997	0
Rpl19	0	-0.542334	0.989	0.995	0
Fabp5	0	0.738456	0.986	0.991	0
Selenow	0	0.71758	0.956	0.961	0
Nfix	0	0.825118	0.994	0.989	0
Hsbp1	0	0.786269	0.894	0.889	0
Gnas	0	0.494985	0.988	0.992	0
Eef1a1	0	-0.37692	0.993	0.997	0
Ckb	0	1.34515	0.999	0.995	0
Slc25a4	0	0.49435	0.983	0.986	0
Prdx2	0	0.608582	0.986	0.989	0
Basp1	0	1.49857	0.998	0.995	0
Marcksl1	0	0.847439	0.964	0.966	0
Ppia	0	-0.544266	0.995	0.997	0
Ptma	0	-0.511791	0.999	1	0
Nfib	0	0.80795	0.999	0.998	0
Actb	0	0.676223	0.999	0.998	0
Ftl1	0	0.629497	0.99	0.991	0
Actg1	0	0.892154	0.998	0.997	0
Calm1	0	0.949529	0.988	0.987	0
Tuba1a	0	1.84624	1	0.999	0
Tmsb10	0	1.19723	0.992	0.992	0
Tcf4	0	0.63442	0.993	0.993	0
Cfl1	0	0.568957	0.99	0.99	0
Malat1	0	0.872326	0.998	0.998	0
Tmsb4x	0	1.44117	1	1	0
Snx5	0	-1.70137	0.107	0.459	0
Calm2	0	0.44152	0.991	0.993	0
Brsk2	0	1.49982	0.648	0.462	0
Angptl2	0	-4.90013	0.007	0.271	0
Dusp8	0	1.70464	0.572	0.328	0
Cdc25b	0	-3.04261	0.033	0.323	0
Exosc7	0	-1.26154	0.24	0.643	0
Vrk1	0	-1.74427	0.101	0.448	0
Marcks	0	0.379617	0.994	0.993	0
Baz1a	0	-1.46546	0.171	0.548	0
Ckap5	0	-1.35187	0.35	0.694	0
Ssbp3	0	1.07384	0.784	0.706	0
Troap	0	-5.84126	0.004	0.26	0
Hcfc1r1	0	1.64164	0.584	0.373	0
Arpc3	0	0.750356	0.891	0.889	0
Ssbp2	0	-1.77195	0.112	0.46	0
Rnmt	0	1.23408	0.733	0.627	0
Kntc1	0	-5.3594	0.005	0.261	0
Rpl31	0	-0.601943	0.854	0.968	0
Vegfb	0	-1.58788	0.129	0.489	0
Abhd16a	0	1.56849	0.608	0.402	0
Nova2	0	1.4082	0.651	0.462	0
Casp8ap2	0	-1.21977	0.259	0.655	0
Rdm1	0	-3.85787	0.014	0.281	0
Blm	0	-2.11416	0.064	0.379	0
Lmnb2	0	-1.7235	0.105	0.45	0
Qk	0	-0.930417	0.448	0.816	0
Espl1	0	-5.56007	0.004	0.256	0
Hist1h3d	0	-4.03572	0.012	0.275	0
Pik3r3	0	1.69309	0.57	0.348	0
Stmn1	0	0.361672	0.998	0.998	0
Ccne1	0	-3.51919	0.02	0.291	0
Mia	0	3.08892	0.342	0.101	0
Mfap4	0	-0.792249	0.304	0.719	0
Hist1h3e	0	-3.59022	0.018	0.286	0
Cd24a	0	0.735147	0.912	0.912	0
Kif18b	0	-6.50377	0.002	0.25	0
Gdpd5	0	2.55865	0.356	0.112	0
Ercc6l	0	-5.35863	0.004	0.255	0
E2f7	0	-4.4758	0.009	0.265	0
Eny2	0	-0.77483	0.623	0.9	0
U2af1	0	-0.64775	0.79	0.956	0
Hist1h3c	0	-4.48141	0.008	0.262	0
Stxbp1	0	1.46286	0.63	0.448	0
Prxl2b	0	1.43174	0.677	0.509	0
Gria2	0	0.877681	0.877	0.762	0
Nrm	0	-1.7364	0.112	0.455	0
Lsm4	0	-0.700488	0.707	0.938	0
Erbb4	0	2.14401	0.466	0.217	0
Map3k13	0	2.76439	0.333	0.095	0
Cyp51	0	1.25981	0.735	0.602	0
Sox2	0	-3.70934	0.017	0.281	0
Wscd1	0	-1.89218	0.079	0.401	0
Ppib	0	0.514434	0.985	0.987	0
Pola2	0	-2.10969	0.072	0.385	0
Pole	0	-3.64027	0.017	0.28	0
Mat2a	0	-0.742225	0.721	0.939	0
Mrpl18	0	-0.82942	0.602	0.887	0
Afap1	0	1.19728	0.732	0.607	0
Snrpa1	0	-0.839384	0.565	0.882	0
Tcof1	0	-1.59699	0.125	0.471	0
Mis18a	0	-1.98696	0.069	0.381	0
Nedd4	0	-0.54299	0.883	0.979	0
Cdkn2c	0	-1.45251	0.182	0.546	0
Hist1h2bm	0	-4.1346	0.011	0.263	0
Gprin3	0	2.86242	0.309	0.08	0
Cep57	0	-1.24516	0.236	0.618	0
Cdc25c	0	-4.78922	0.006	0.251	0
Tulp4	0	1.08304	0.775	0.707	0
Cntln	0	-1.84694	0.088	0.41	0
Thrap3	0	-0.837659	0.572	0.875	0
Iqgap3	0	-6.22363	0.002	0.242	0
Ccnd3	0	-2.188	0.079	0.388	0
Ddr2	0	-2.48027	0.042	0.325	0
B2m	0	-3.05598	0.026	0.292	0
Mybl2	0	-5.26552	0.004	0.246	0
Rpa1	0	-2.0988	0.066	0.367	0
Ruvbl1	0	-1.02966	0.316	0.713	0
Npm3	0	-1.43377	0.162	0.52	0
Usp22	0	1.00803	0.792	0.73	0
Kif14	0	-6.09763	0.002	0.239	0
Prdx6	0	-0.850348	0.517	0.859	0
Smpd2	0	-2.67376	0.038	0.315	0
Pou3f2	0	-0.99256	0.385	0.765	0
Lpin2	0	-1.74351	0.112	0.441	0
Pole4	0	-1.2983	0.194	0.568	0
Rpl29	0	-0.495907	0.928	0.979	0
Whrn	0	-2.96153	0.028	0.293	0
Mapt	0	2.13947	0.483	0.252	0
Serf1	0	1.07509	0.771	0.701	0
Haus4	0	-3.35428	0.019	0.275	0
Itgb3bp	0	-1.81652	0.084	0.397	0
Ntrk3	0	-2.44669	0.067	0.358	0
Rfc1	0	-1.11184	0.275	0.657	0
Gemin6	0	-1.87473	0.076	0.385	0
Myb	0	-4.80227	0.007	0.246	0
Smchd1	0	-0.893191	0.451	0.805	0
Tom1l1	0	-1.76671	0.097	0.416	0
Alcam	0	-1.80291	0.093	0.407	0
Pgf	0	-6.00988	0.002	0.235	0
Hprt	0	-1.13632	0.265	0.651	0
Tmem107	0	-2.34258	0.047	0.328	0
Ska3	0	-4.96413	0.005	0.24	0
Gen1	0	-4.7384	0.007	0.244	0
Cdk4	0	-0.48816	0.921	0.981	0
Eif3a	0	-0.645656	0.771	0.946	0
Ncam1	0	0.753033	0.923	0.895	0
Foxo6	0	-4.58348	0.008	0.246	0
Pbdc1	0	-1.26321	0.187	0.555	0
Ccne2	0	-4.88243	0.007	0.243	0
Cmtm3	0	-3.05772	0.026	0.282	0
Tubb5	0	0.343512	0.997	0.996	0
4930578M01Rik	0	1.31708	0.648	0.461	0
Taf1d	0	-1.09761	0.284	0.668	0
Cdca7l	0	-3.65766	0.014	0.257	0
Mkrn1	0	1.14031	0.709	0.598	0
Smim18	0	2.50191	0.325	0.098	0
Pcbp2	0	-0.696623	0.681	0.91	0
H3f3a	0	0.251657	0.997	0.999	0
Rrs1	0	-1.29968	0.195	0.554	0
Rpl26	0	-0.434	0.95	0.982	0
Cenpl	0	-2.81882	0.027	0.283	0
Enho	0	1.54554	0.576	0.372	0
Gpc1	0	-2.33864	0.047	0.322	0
E2f2	0	-2.95891	0.03	0.287	0
Pcgf5	0	-3.4261	0.018	0.263	0
Serpini1	0	2.17585	0.403	0.168	0
Vsx2	0	-4.11208	0.016	0.257	0
Tbata	0	-1.96506	0.22	0.533	0
D430041D05Rik	0	-0.93659	0.443	0.794	0
Mien1	0	1.10964	0.712	0.625	0
Pdzrn4	0	-2.59707	0.037	0.301	0
Snrpe	0	-0.476552	0.91	0.978	0
Ldha	0	-1.04409	0.387	0.746	0
Haus6	0	-1.97211	0.064	0.354	0
Ddx39b	0	-0.54337	0.844	0.975	0
Frmd4b	0	-1.19904	0.276	0.631	0
Cxcr4	0	-5.64981	0.003	0.228	0
Klhl35	0	2.41956	0.365	0.13	0
Ppih	0	-1.07859	0.281	0.665	0
Rpl23a	0	-0.547735	0.883	0.971	0
Rbfox3	0	1.03151	0.765	0.67	0
Serinc1	0	1.06141	0.746	0.659	0
Mrpl42	0	-0.934261	0.398	0.774	0
Pole2	0	-3.99315	0.011	0.244	0
Nbea	0	1.27486	0.673	0.544	0
Hspa9	0	-0.937615	0.469	0.805	0
Pmepa1	0	-1.76437	0.086	0.385	0
Trp53inp2	0	1.95577	0.454	0.23	0
Hist1h4i	0	-2.03355	0.061	0.341	0
Ncaph2	0	-1.45699	0.12	0.444	0
Gm42047	0	-3.07449	0.047	0.304	0
Asap1	0	-1.07877	0.256	0.623	0
Erh	0	-0.668726	0.736	0.933	0
Tjp1	0	-1.60458	0.092	0.396	0
Hnrnpa1	0	-0.381862	0.975	0.99	0
Rad54l	0	-4.61232	0.006	0.229	0
Cdc7	0	-1.35602	0.155	0.494	0
Gli2	0	-4.30739	0.008	0.233	0
Raly	0	-0.767799	0.561	0.864	0
Snu13	0	-0.677149	0.709	0.927	0
Fdps	0	0.972633	0.802	0.757	0
B3galt2	0	2.12227	0.387	0.157	0
Loxl1	0	-5.67604	0.003	0.219	0
A430005L14Rik	0	-1.33588	0.15	0.487	0
Prr11	0	-4.67787	0.005	0.224	0
Nolc1	0	-1.08096	0.264	0.633	0
Cenpj	0	-1.62837	0.092	0.393	0
Haspin	0	-4.47541	0.007	0.228	0
Sap30	0	-1.11988	0.284	0.639	0
Med30	0	-0.957998	0.394	0.749	0
Gm11541	0	-2.15082	0.048	0.313	0
Ttc9b	0	1.03294	0.748	0.597	0
Acot7	0	-1.38523	0.142	0.471	0
Eif2s2	0	-0.753079	0.699	0.914	0
Eri1	0	-1.21661	0.189	0.538	0
Tle5	0	0.625709	0.918	0.92	0
Mlf1	0	-2.73316	0.031	0.276	0
Peg13	0	2.0402	0.415	0.192	0
Nedd1	0	-2.32202	0.041	0.297	0
Rad50	0	-1.58691	0.099	0.401	0
Hmgn3	0	-1.06229	0.275	0.641	0
Cdc6	0	-5.75354	0.002	0.214	0
Tcf19	0	-4.54861	0.008	0.227	0
Pdlim1	0	-3.48779	0.015	0.241	0
Zfp704	0	-0.938164	0.367	0.731	0
Mtap	0	-3.02082	0.021	0.256	0
Sowaha	0	-2.46714	0.061	0.324	0
Sema7a	0	-1.61692	0.114	0.418	0
Umps	0	-1.92339	0.066	0.341	0
C1qbp	0	-0.766586	0.596	0.871	0
Rabac1	0	1.18921	0.677	0.568	0
Miat	0	0.862768	0.882	0.813	0
Cep83	0	-1.12267	0.224	0.581	0
Smarcd3	0	-2.03988	0.065	0.334	0
Pold1	0	-2.33938	0.042	0.297	0
Phf10	0	-1.46231	0.136	0.452	0
Prps1	0	-1.34061	0.136	0.461	0
Cadps	0	1.5791	0.543	0.342	0
Pafah1b3	0	1.0546	0.744	0.678	0
Maged2	0	1.62018	0.552	0.372	0
Dnaaf2	0	-1.56653	0.098	0.397	0
Sphkap	0	2.05138	0.421	0.196	0
Tomm7	0	-0.661872	0.66	0.908	0
Rbbp8	0	-1.48102	0.114	0.421	0
Oaz1	0	-0.384235	0.962	0.99	0
Mturn	0	2.06422	0.415	0.197	0
Ppp3ca	0	0.850332	0.841	0.822	0
Rpl7	0	-0.379867	0.968	0.989	0
Cenpi	0	-4.52008	0.006	0.219	0
Carnmt1	0	-1.06676	0.242	0.603	0
Jsrp1	0	-4.27368	0.009	0.225	0
Btg1	0	0.848365	0.839	0.805	0
Bex4	0	-1.05801	0.319	0.671	0
Myh7b	0	2.44142	0.336	0.118	0
Rpl35	0	-0.416591	0.942	0.981	0
Eomes	0	3.79808	0.197	0.028	0
Eln	0	-4.98822	0.008	0.222	0
Camk2d	0	2.0012	0.479	0.268	0
Galr1	0	3.2801	0.227	0.043	0
Mpdz	0	-2.35483	0.042	0.293	0
Col18a1	0	-5.96451	0.002	0.207	0
Cntrl	0	-2.07041	0.062	0.326	0
Dhx32	0	-1.37222	0.14	0.459	0
Arpc1a	0	0.789756	0.832	0.817	0
Bin1	0	1.06815	0.72	0.636	0
Rnf26	0	-2.06327	0.055	0.316	0
Rnf168	0	-1.42354	0.135	0.45	0
Wdhd1	0	-3.04116	0.023	0.254	0
Ubc	0	0.625107	0.937	0.933	0
Nfic	0	-1.09155	0.279	0.628	0
Nek7	0	-2.87283	0.026	0.257	0
Nes	0	-2.10963	0.058	0.316	0
Atm	0	-1.81105	0.076	0.352	0
Clip3	0	1.33102	0.611	0.47	0
Cbx1	0	-0.558967	0.788	0.95	0
Scmh1	0	1.43652	0.585	0.416	0
Xrcc1	0	-1.39642	0.116	0.425	0
Irs1	0	-1.88177	0.067	0.335	0
Vamp2	0	1.50336	0.554	0.382	0
Rpl7a	0	-0.398882	0.957	0.986	0
Hmgcr	0	1.16067	0.717	0.63	0
Prmt2	0	1.69862	0.484	0.282	0
Rab6a	0	1.07361	0.711	0.648	0
Rnaseh2b	0	-1.10587	0.22	0.571	0
Zwilch	0	-4.41341	0.008	0.217	0
Prdm8	0	1.87841	0.523	0.344	0
Cdca4	0	-1.77978	0.074	0.349	0
Dpysl5	0	1.96199	0.449	0.243	0
Stag2	0	-1.04005	0.246	0.599	0
Stil	0	-5.09554	0.004	0.209	0
Atp6v1e1	0	1.09666	0.694	0.606	0
Nrcam	0	1.36879	0.604	0.439	0
Gkap1	0	-0.94929	0.319	0.685	0
Rnd3	0	-0.754971	0.498	0.836	0
Srsf6	0	-0.65877	0.666	0.91	0
Brip1	0	-6.10503	0.002	0.204	0
Soga3	0	0.9127	0.779	0.728	0
Mastl	0	-3.11014	0.019	0.241	0
Prkd3	0	-1.40178	0.119	0.423	0
Gm47283	0	-0.935461	0.484	0.797	0
Hist1h2bj	0	-3.10429	0.02	0.243	0
Snrpd3	0	-0.684289	0.628	0.891	0
Kifc5b	0	-3.4658	0.013	0.227	0
Gadd45a	0	1.95421	0.468	0.262	0
Syt13	0	-3.18111	0.023	0.245	0
Vldlr	0	-1.69222	0.107	0.392	0
Coro1a	0	2.3522	0.342	0.132	0
Enkd1	0	-1.94187	0.056	0.313	0
Slc29a1	0	-0.74524	0.595	0.879	0
Timm23	0	-0.661723	0.697	0.918	0
Rbbp4	0	-0.600579	0.75	0.934	0
Orc6	0	-0.965113	0.331	0.689	0
Traip	0	-3.05452	0.017	0.236	0
Baz1b	0	-0.834559	0.457	0.796	0
Mroh2a	0	-2.48678	0.047	0.287	0
Tuba1c	0	-4.26953	0.012	0.221	0
Wasf2	0	-1.61008	0.092	0.373	0
Chsy1	0	-2.30662	0.036	0.273	0
Aunip	0	-6.22096	0.002	0.199	0
Dsn1	0	-2.88389	0.021	0.243	0
Rpl5	0	-0.513766	0.865	0.963	0
Larp7	0	-1.0352	0.237	0.588	0
Actl6a	0	-0.794625	0.47	0.811	0
Arl8a	0	1.37828	0.592	0.445	0
Atxn7l3b	0	0.601206	0.927	0.926	0
Mrpl51	0	-0.839612	0.448	0.787	0
Clcn4	0	1.20901	0.653	0.544	0
Cbln4	0	-3.75337	0.014	0.223	0
Crmp1	0	0.55743	0.958	0.938	0
Lims1	0	-0.984579	0.241	0.596	0
Hspa14	0	-0.972192	0.273	0.634	0
Fitm1	0	-3.75883	0.016	0.227	0
Ttf2	0	-2.60079	0.025	0.249	0
Dna2	0	-3.34164	0.017	0.229	0
Btg3	0	-1.7311	0.078	0.346	0
Slfn9	0	-6.35446	0.002	0.196	0
Spop	0	-1.03848	0.283	0.626	0
Pif1	0	-6.0955	0.002	0.196	0
Cirbp	0	0.70341	0.879	0.863	0
Tgif1	0	-2.07672	0.05	0.295	0
Cmss1	0	-1.06815	0.189	0.528	0
Hmgb3	0	-0.516075	0.891	0.973	0
Nudt5	0	-0.980309	0.259	0.616	0
Ruvbl2	0	-0.952864	0.277	0.633	0
Rbl1	0	-3.70453	0.011	0.215	0
Zic2	0	0.859585	0.797	0.759	0
Cdkn3	0	-3.99904	0.011	0.214	0
Akr1b3	0	-1.97657	0.056	0.304	0
Snrnp40	0	-0.721501	0.564	0.85	0
Fgfr4	0	-5.17471	0.005	0.199	0
Mettl9	0	-0.70653	0.554	0.858	0
Acot1	0	-3.91486	0.012	0.214	0
Ift27	0	-0.921018	0.339	0.694	0
Dcps	0	-1.41911	0.111	0.402	0
Reln	0	1.15127	0.691	0.586	0
Pcnt	0	-1.46679	0.104	0.389	0
Cep290	0	-1.48225	0.104	0.385	0
Parp1	0	-0.910537	0.343	0.693	0
Paxip1	0	-1.4751	0.101	0.384	0
Atxn10	0	0.85378	0.777	0.75	0
Nfia	0	0.407848	0.988	0.99	0
Ubl3	0	1.23879	0.631	0.511	0
Mis12	0	-1.44328	0.102	0.385	0
Net1	0	-2.83789	0.024	0.239	0
Wdr43	0	-1.03593	0.227	0.57	0
Gfer	0	-1.0992	0.196	0.528	0
Mybbp1a	0	-1.13652	0.188	0.512	0
Arhgap19	0	-3.95239	0.01	0.208	0
Jph4	0	2.4884	0.312	0.112	0
Cd164	0	-1.47401	0.116	0.401	0
Ppwd1	0	-1.59133	0.088	0.357	0
Sept10	0	-2.32285	0.032	0.256	0
Ywhaq	0	0.525783	0.934	0.957	0
Ssb	0	-0.504566	0.812	0.957	0
Usp37	0	-1.29408	0.134	0.431	0
Trim28	0	-0.722531	0.498	0.824	0
Exosc5	0	-1.07033	0.199	0.531	0
Parp2	0	-1.25234	0.135	0.435	0
Pard6a	0	1.25952	0.609	0.471	0
Zfp91	0	-0.657148	0.622	0.889	0
Pwwp3b	0	-3.08505	0.018	0.223	0
Tbc1d15	0	-1.13428	0.161	0.476	0
Ndufa4	0	0.337051	0.985	0.991	0
Col4a1	0	-5.85064	0.003	0.19	0
Maz	0	-0.642032	0.635	0.902	0
Neurod2	0	2.03981	0.381	0.174	0
Hist1h4h	0	-2.07497	0.047	0.28	0
Fam171a2	0	1.40777	0.546	0.379	0
Fkbp2	0	-0.750075	0.493	0.821	0
Gabarapl2	0	0.638507	0.871	0.887	0
Apcdd1	0	-3.55127	0.015	0.214	0
Atat1	0	1.6334	0.481	0.296	0
Cad	0	-1.77215	0.064	0.314	0
Txnl1	0	-0.600168	0.688	0.913	0
Tpcn1	0	-1.58971	0.089	0.353	0
Samd1	0	-1.16309	0.186	0.501	0
Kcnc3	0	1.3294	0.591	0.448	0
Pkn2	0	-0.931613	0.257	0.604	0
Efs	0	-1.12156	0.159	0.471	0
Cdh15	0	-6.15475	0.002	0.185	0
Suv39h1	0	-1.40377	0.089	0.358	0
Ctcf	0	-0.675116	0.638	0.88	0
Uhrf2	0	-0.904088	0.317	0.664	0
Eme1	0	-4.1	0.007	0.195	0
Smc5	0	-1.03166	0.21	0.538	0
Orc2	0	-1.08731	0.182	0.501	0
Haus1	0	-1.28489	0.113	0.397	0
Nup210	0	-2.162	0.039	0.263	0
Tcerg1	0	-0.809845	0.388	0.732	0
Sox18	0	-1.14821	0.227	0.534	0
1810037I17Rik	0	-0.835294	0.4	0.744	0
Nol7	0	-0.570438	0.708	0.92	0
Bard1	0	-4.37975	0.005	0.19	0
Epb41l2	0	-1.62307	0.07	0.32	0
Ctdspl2	0	-1.07486	0.198	0.519	0
Ppp2r5a	0	-2.42362	0.03	0.244	0
Pde1c	0	1.32741	0.681	0.601	0
Haus5	0	-1.97941	0.047	0.277	0
Tspyl4	0	1.4346	0.535	0.368	0
Nxph4	0	2.01318	0.36	0.157	0
Stxbp5l	0	1.81025	0.425	0.228	0
Mdga1	0	-1.08305	0.178	0.493	0
Smc3	0	-0.589844	0.726	0.923	0
AI506816	0	-2.14633	0.04	0.263	0
Aig1	0	1.7574	0.447	0.257	0
Lgals1	0	-1.5213	0.162	0.439	0
Rbm15	0	-1.46177	0.102	0.373	0
Psph	0	-1.67753	0.109	0.373	0
Mt1	0	-3.48564	0.014	0.207	0
Cse1l	0	-1.11493	0.164	0.473	0
Islr2	0	-1.82127	0.065	0.302	0
Wnt4	0	-5.9676	0.003	0.183	0
Mrto4	0	-0.756189	0.463	0.797	0
Tmem97	0	-1.42017	0.088	0.351	0
Ddx3x	0	-0.757074	0.456	0.782	0
Rbmxl1	0	-0.822182	0.384	0.736	0
Fdft1	0	1.33064	0.593	0.47	0
Snrpd2	0	-0.462735	0.859	0.966	0
Fbln1	0	-4.09725	0.008	0.192	0
Fundc2	0	-0.816684	0.357	0.708	0
Nsmf	0	-1.79098	0.058	0.294	0
Stx7	0	1.62272	0.483	0.312	0
Rpl34	0	-0.34408	0.965	0.986	0
Msh6	0	-1.80029	0.066	0.305	0
Phf5a	0	-0.62958	0.605	0.881	0
Kdm7a	0	1.83891	0.407	0.212	0
Gria4	0	1.79469	0.426	0.232	0
Pcdh18	0	-4.26137	0.006	0.186	0
Emg1	0	-0.696918	0.506	0.823	0
Scrn1	0	2.28624	0.323	0.132	0
Eif2s1	0	-0.68004	0.575	0.86	0
Dync1i2	0	0.79104	0.803	0.772	0
Zic4	0	0.809246	0.798	0.769	0
Pkm	0	-0.532002	0.792	0.948	0
Syp	0	1.77995	0.423	0.23	0
Bex1	0	-1.31159	0.18	0.464	0
Cltb	0	-1.18195	0.458	0.738	0
Purb	0	-0.565061	0.838	0.96	0
Otud4	0	-1.10654	0.15	0.447	0
Mthfd1	0	-2.20906	0.037	0.251	0
Nav1	0	0.749376	0.882	0.892	0
Txndc12	0	-1.0295	0.218	0.539	0
Nkd1	0	-0.821361	0.316	0.654	0
Tra2b	0	-0.663206	0.575	0.865	0
Cyfip2	0	2.28208	0.324	0.134	0
Dstn	0	0.616099	0.88	0.898	0
Terf1	0	-1.33211	0.112	0.38	0
Cdk2ap1	0	-0.576031	0.694	0.916	0
Zfpm2	0	2.3797	0.328	0.135	0
Pkmyt1	0	-3.03664	0.016	0.206	0
Suv39h2	0	-1.36371	0.1	0.363	0
Rab3c	0	1.42202	0.546	0.399	0
Sf3b5	0	-0.643736	0.579	0.862	0
Arpc5	0	0.890826	0.738	0.713	0
G2e3	0	-1.20054	0.205	0.5	0
Syncrip	0	-0.534603	0.744	0.934	0
Depdc1b	0	-6.67841	0.001	0.17	0
Etf1	0	-0.883557	0.313	0.655	0
Tmem237	0	-0.964992	0.205	0.526	0
Ift74	0	-1.15593	0.15	0.44	0
Efcab11	0	-3.4465	0.011	0.193	0
Prps2	0	-2.96273	0.015	0.201	0
Shmt2	0	-1.04574	0.26	0.577	0
Ccm2	0	-1.14143	0.222	0.523	0
Hadh	0	-1.69031	0.069	0.303	0
Ccp110	0	-1.01573	0.218	0.533	0
Cep170	0	0.909687	0.735	0.686	0
Xpo1	0	-0.820429	0.335	0.677	0
Gpsm2	0	-2.10544	0.04	0.251	0
Smarcc1	0	-0.618329	0.619	0.882	0
Rad54b	0	-4.40781	0.005	0.177	0
Ahctf1	0	-1.11858	0.159	0.453	0
Cep89	0	-2.38654	0.039	0.244	0
Frmd4a	0	0.853055	0.767	0.711	0
Map6	0	2.16517	0.313	0.127	0
Sqle	0	1.28418	0.602	0.491	0
Asf1a	0	-0.775636	0.385	0.727	0
Pole3	0	-0.909251	0.245	0.573	0
Neo1	0	-0.874206	0.256	0.589	0
Akap12	0	2.28479	0.308	0.123	0
Brd3	0	-0.6686	0.508	0.819	0
Zfp36l2	0	-2.71087	0.021	0.211	0
Smoc1	0	-3.0084	0.019	0.205	0
Rab13	0	-1.88466	0.057	0.279	0
Celf5	0	2.21141	0.316	0.13	0
Naa20	0	-0.793683	0.358	0.698	0
Fancl	0	-3.59309	0.011	0.188	0
Ube2i	0	-0.479613	0.798	0.951	0
Gemin2	0	-1.7694	0.054	0.276	0
Gltp	0	-1.34914	0.101	0.358	0
Srsf1	0	-0.604607	0.61	0.881	0
Sgip1	0	1.90187	0.368	0.179	0
Gpc6	0	-4.57981	0.004	0.172	0
Anxa4	0	-1.87748	0.061	0.283	0
Arpp21	0	1.92937	0.405	0.216	0
Gins1	0	-1.85568	0.048	0.263	0
Scg3	0	0.969472	0.695	0.639	0
Lmo4	0	-0.872789	0.454	0.749	0
Gdpd1	0	1.03332	0.643	0.541	0
Mpc1	0	0.649379	0.854	0.875	0
Nfasc	0	2.53493	0.258	0.084	0
Nup85	0	-1.22992	0.117	0.384	0
Aarsd1	0	-0.708096	0.488	0.797	0
Prdx5	0	0.808171	0.771	0.763	0
Bola2	0	-0.687602	0.498	0.818	0
Ddx27	0	-0.959906	0.223	0.538	0
Hmbs	0	-1.1533	0.147	0.429	0
Arl6ip6	0	-0.98505	0.251	0.564	0
Smarca5	0	-0.519722	0.774	0.939	0
Ing5	0	-1.6747	0.058	0.281	0
Ppp1r14b	0	-0.350129	0.985	0.99	0
Igdcc4	0	-2.87776	0.02	0.204	0
S100a16	0	2.11465	0.336	0.147	0
Klf13	0	-0.751963	0.398	0.729	0
Mybl1	0	-3.20976	0.013	0.19	0
Siah1b	0	-1.61073	0.064	0.292	0
Trps1	0	-1.37222	0.089	0.334	0
Nup43	0	-1.07905	0.146	0.431	0
Khsrp	0	-0.890464	0.224	0.544	0
Nr3c1	0	-1.8603	0.047	0.258	0
Myl12a	0	-0.773246	0.362	0.701	0
Alg13	0	-1.65602	0.063	0.288	0
Atp6v1f	0	0.73898	0.788	0.793	0
Pclo	0	1.57422	0.46	0.282	0
Akap9	0	0.713804	0.827	0.815	0
Ppig	0	-0.640612	0.554	0.84	0
Tcp1	0	-0.562131	0.655	0.898	0
Atl1	0	1.57111	0.469	0.304	0
4930503L19Rik	0	-1.3198	0.1	0.352	0
Ebf3	0	1.17428	0.615	0.506	0
Nsmce1	0	-0.746871	0.401	0.734	0
Wsb2	0	1.443	0.5	0.351	0
Trappc4	0	0.846963	0.733	0.713	0
Cited1	0	-2.03759	0.044	0.249	0
Zgrf1	0	-2.78896	0.021	0.204	0
Slc25a5	0	-0.441608	0.9	0.972	0
Top2b	0	0.689142	0.851	0.856	0
Rpp30	0	-0.961422	0.199	0.508	0
Magoh	0	-0.66782	0.529	0.829	0
Lin9	0	-1.40588	0.084	0.322	0
Pitrm1	0	-1.37675	0.087	0.329	0
Jag1	0	-3.35433	0.012	0.183	0
Lzts1	0	2.07971	0.335	0.153	0
Fam120a	0	-0.944967	0.197	0.5	0
Mrpl12	0	-0.702399	0.486	0.798	0
Lingo1	0	1.15455	0.592	0.453	0
Rundc3a	0	0.988687	0.664	0.58	0
Amd1	0	-1.15881	0.134	0.404	0
Pck2	0	-1.9016	0.053	0.264	0
St3gal4	0	-1.55206	0.072	0.3	0
Ddx11	0	-2.83763	0.015	0.191	0
Josd2	0	-1.02527	0.18	0.472	0
Sv2a	0	2.28955	0.281	0.104	0
Tmem63b	0	1.27755	0.568	0.445	0
Srd5a1	0	-1.66106	0.059	0.276	0
Tmem229a	0	-4.25305	0.006	0.169	0
Ubald2	0	-0.988687	0.42	0.698	0
Cep135	0	-2.50696	0.021	0.201	0
Cnih4	0	-0.735375	0.391	0.733	0
Vgll4	0	-1.11665	0.125	0.386	0
Mad2l2	0	-1.0081	0.167	0.454	0
Nectin1	0	-2.14421	0.035	0.229	0
Fam83d	0	-6.02772	0.002	0.157	0
Lsm14a	0	-0.89877	0.217	0.526	0
Mak16	0	-0.83408	0.277	0.603	0
Evl	0	0.912108	0.709	0.673	0
Wdr47	0	1.64082	0.442	0.273	0
Asxl1	0	-1.16686	0.132	0.397	0
Ipo7	0	-0.870727	0.244	0.56	0
Tcf3	0	-0.684843	0.424	0.76	0
Nelfe	0	-0.947917	0.21	0.515	0
Hivep2	0	1.98977	0.358	0.179	0
Prpf4	0	-1.03385	0.148	0.424	0
Pds5b	0	-0.841783	0.273	0.597	0
2410006H16Rik	0	-0.746217	0.568	0.834	0
Rsl1d1	0	-0.595601	0.609	0.865	0
Dars	0	-1.10329	0.144	0.415	0
Pkp4	0	-1.37545	0.078	0.307	0
Uchl5	0	-0.85212	0.242	0.558	0
Inppl1	0	-1.70969	0.053	0.261	0
Gnb2	0	0.452208	0.947	0.958	0
Sf3a3	0	-0.741286	0.363	0.692	0
Ddx21	0	-0.903865	0.193	0.487	0
Serp2	0	1.36939	0.517	0.371	0
Ccdc28b	0	1.24304	0.561	0.44	0
Cask	0	1.44716	0.504	0.364	0
Nup107	0	-1.24942	0.097	0.339	0
Ppan	0	-1.04551	0.17	0.449	0
Glce	0	1.70228	0.433	0.265	0
Eftud2	0	-0.904147	0.21	0.514	0
Fanca	0	-4.11861	0.006	0.164	0
N4bp2	0	-1.08502	0.153	0.424	0
Exosc3	0	-0.939596	0.177	0.469	0
Parp6	0	1.50136	0.458	0.3	0
Mapk10	0	1.90383	0.355	0.179	0
Oip5	0	-3.97051	0.006	0.163	0
Fxn	0	-0.960514	0.177	0.465	0
Gng12	0	-1.18571	0.109	0.358	0
2900079G21Rik	0	2.61388	0.235	0.074	0
Tub	0	1.93138	0.346	0.169	0
Commd1	0	-0.598412	0.564	0.853	0
Scpep1	0	-2.50203	0.025	0.203	0
Kcnb2	0	1.9993	0.335	0.158	0
Tmem123	0	-1.7609	0.047	0.248	0
Pycr2	0	-0.956837	0.173	0.457	0
Dusp4	0	2.2551	0.271	0.101	0
Msmo1	0	1.44568	0.552	0.422	0
Ebf2	0	-1.21008	0.11	0.353	0
Pgam1	0	-0.594626	0.601	0.859	0
Tsen15	0	-1.25282	0.106	0.351	0
Sh3bgrl3	0	0.976529	0.661	0.596	0
Clta	0	0.4629	0.933	0.952	0
Tceal9	0	-0.505738	0.738	0.923	0
Hist1h2af	0	-5.74798	0.002	0.151	0
Fstl1	0	-1.78855	0.059	0.264	0
Eprs	0	-0.579846	0.673	0.891	0
Brd7	0	-0.761963	0.345	0.664	0
Cox4i1	0	0.312345	0.98	0.987	0
Etfa	0	-0.852743	0.273	0.586	0
Srrt	0	-0.686201	0.409	0.74	0
Gtse1	0	-5.39996	0.002	0.151	0
Hnrnpr	0	-0.471366	0.769	0.937	0
Nfe2l2	0	-1.83305	0.048	0.246	0
Mettl1	0	-1.25819	0.112	0.354	0
Pds5a	0	-0.760886	0.298	0.62	0
Mab21l1	0	1.36315	0.505	0.357	0
Sinhcaf	0	-0.675003	0.387	0.719	0
Tfap4	0	-1.96801	0.039	0.229	0
Nudcd1	0	-1.3601	0.076	0.298	0
Fam43a	0	-1.72036	0.057	0.26	0
Nup50	0	-0.913881	0.209	0.502	0
D16Ertd472e	0	-1.94813	0.041	0.231	0
Fxr1	0	-0.734372	0.341	0.669	0
Ramp2	0	-2.52189	0.03	0.207	0
Tardbp	0	-0.626004	0.489	0.801	0
Nup155	0	-1.27921	0.091	0.321	0
Ubb	0	0.292864	0.994	0.995	0
Srrm1	0	-0.505248	0.684	0.913	0
Tecr	0	0.511128	0.908	0.923	0
Utp3	0	-0.712011	0.369	0.694	0
Sephs1	0	-1.00022	0.168	0.441	0
Tdp1	0	-1.20192	0.096	0.331	0
Gart	0	-0.980507	0.156	0.425	0
Fancd2	0	-5.74651	0.002	0.147	0
Tbc1d31	0	-2.59945	0.021	0.19	0
Cpne3	0	-1.58293	0.059	0.263	0
Rftn1	0	-1.43531	0.074	0.29	0
Tmtc2	0	2.20762	0.287	0.12	0
Exosc2	0	-1.69078	0.047	0.242	0
mt-Co1	0	0.260518	0.999	0.999	0
Eno1	0	-0.799373	0.381	0.69	0
Cyb5a	0	1.01754	0.619	0.545	0
Kifap3	0	1.17209	0.581	0.491	0
2810408I11Rik	0	-3.01516	0.013	0.172	0
Chchd2	0	0.282068	0.984	0.99	0
Rsrp1	0	0.630677	0.877	0.88	0
Ptch2	0	-1.54911	0.058	0.26	0
Elmsan1	0	-2.7206	0.019	0.184	0
Gsr	0	-0.970266	0.206	0.488	0
Mpc2	0	0.711985	0.779	0.796	0
Prdm13	0	-1.69701	0.059	0.26	0
Atf5	0	-1.21979	0.135	0.382	0
Cemip2	0	1.18765	0.576	0.459	0
Atp9a	0	1.80088	0.349	0.175	0
Hnrnpa2b1	0	-0.380008	0.953	0.989	0
Cdh4	0	-1.64202	0.064	0.268	0
Myg1	0	-0.941062	0.177	0.455	0
Nacad	0	2.26362	0.261	0.098	0
Gm11837	0	-2.44916	0.023	0.193	0
Rabggtb	0	-0.836754	0.237	0.541	0
Ftsj3	0	-0.975352	0.164	0.434	0
Cep295	0	-0.854034	0.194	0.48	0
Meis1	0	0.742758	0.794	0.774	0
Exosc1	0	-0.828288	0.236	0.539	0
Atp6v0d1	0	0.948728	0.649	0.589	0
Chd7	0	0.668697	0.839	0.835	0
Gm10282	0	-2.72101	0.017	0.179	0
Hist1h3a	0	-3.55579	0.009	0.162	0
Asnsd1	0	-1.24988	0.09	0.316	0
Fnbp1l	0	0.799738	0.747	0.728	0
Pkdcc	0	-1.22494	0.103	0.334	0
D630003M21Rik	0	-4.56694	0.004	0.149	0
Tshz2	0	-0.784447	0.321	0.628	0
Gm3550	0	-3.2544	0.012	0.167	0
Mycl	0	-0.898884	0.201	0.482	0
Csrnp3	0	1.78827	0.382	0.216	0
Reep3	0	1.00542	0.655	0.594	0
Hsp90b1	0	-0.548597	0.788	0.945	0
Mrpl13	0	-0.725518	0.363	0.687	0
Sipa1l3	0	-1.06209	0.128	0.376	0
Srp14	0	0.508922	0.892	0.924	0
Nit2	0	-1.15406	0.117	0.359	0
Porcn	0	2.20849	0.28	0.116	0
Serpinh1	0	-1.05044	0.151	0.405	0
Haus3	0	-1.00562	0.15	0.412	0
Ebna1bp2	0	-0.623511	0.517	0.813	0
E2f3	0	-0.954887	0.169	0.436	0
Rab2a	0	0.566142	0.873	0.891	0
Iqgap1	0	-0.95039	0.145	0.403	0
Tedc1	0	-2.47822	0.022	0.188	0
Zfyve21	0	-1.37534	0.069	0.278	0
Mef2c	0	-1.30917	0.08	0.294	0
Jam3	0	-1.089	0.115	0.354	0
Sptbn1	0	0.923127	0.692	0.627	0
Asic1	0	2.20351	0.259	0.099	0
Sparcl1	0	-2.65121	0.034	0.207	0
Naa10	0	-0.765336	0.318	0.635	0
Zw10	0	-1.22104	0.087	0.307	0
Ssbp1	0	-0.640304	0.469	0.778	0
Rprd1b	0	-0.983581	0.142	0.396	0
Sh3bp5	0	1.85905	0.346	0.179	0
Sclt1	0	-0.950011	0.147	0.404	0
Cep128	0	-2.18572	0.028	0.199	0
Cacybp	0	-0.495084	0.742	0.918	0
Rgs16	0	-3.2459	0.014	0.167	0
Nup153	0	-1.00057	0.148	0.405	0
Phf20l1	0	0.9069	0.713	0.687	0
Brd8	0	-0.738144	0.469	0.745	0
Maco1	0	0.852172	0.675	0.62	0
Mta1	0	-0.755454	0.28	0.593	0
Tgif2	0	-1.35996	0.069	0.274	0
Msh2	0	-0.967373	0.161	0.42	0
Tpi1	0	1.20228	0.554	0.439	0
Flnc	0	-4.39506	0.006	0.148	0
Rtkn2	0	-1.80018	0.048	0.235	0
Msl3	0	-1.11952	0.111	0.346	0
Pde4d	0	1.8175	0.384	0.223	0
Lman1	0	-0.685311	0.402	0.718	0
Dnaja1	0	0.352126	0.973	0.984	0
Srsf4	0	-0.703138	0.36	0.678	0
Anxa6	0	-2.00128	0.038	0.214	0
Lpl	0	-5.11191	0.003	0.141	0
Lage3	0	-0.721997	0.31	0.628	0
Sord	0	-2.44273	0.019	0.179	0
Ifrd1	0	-0.728495	0.366	0.673	0
Stub1	0	-0.525152	0.66	0.887	0
Nemp1	0	-2.66877	0.014	0.167	0
Snap91	0	2.17575	0.267	0.108	0
Mlec	0	-0.751707	0.273	0.578	0
Dhrs4	0	-1.15769	0.104	0.331	0
Rab28	0	-0.762306	0.273	0.584	0
Eef1g	0	-0.44334	0.843	0.954	0
Pla2g12a	0	-1.20071	0.097	0.32	0
Sp1	0	-1.03925	0.108	0.34	0
Prnp	0	1.37702	0.486	0.344	0
Donson	0	-1.69326	0.048	0.233	0
Fzd2	0	-0.755959	0.339	0.644	0
Rpl38	0	-0.30649	0.96	0.985	0
Nptx1	0	-3.62323	0.012	0.159	0
Dcc	0	1.01829	0.714	0.683	0
Eif4a3	0	-0.626372	0.493	0.789	0
Sf1	0	-0.646878	0.363	0.684	0
Pacsin3	0	-4.25282	0.004	0.142	0
Sash1	0	-3.79517	0.007	0.147	0
Rbmx2	0	-0.850917	0.22	0.507	0
Kbtbd11	0	-1.31661	0.075	0.278	0
Tssc4	0	-0.795429	0.25	0.545	0
Nsmce2	0	-0.706389	0.309	0.627	0
Sh3gl2	0	1.37796	0.484	0.35	0
Pnn	0	-0.451292	0.775	0.939	0
Asrgl1	0	-1.28685	0.086	0.298	0
Hnrnpul1	0	-0.689998	0.316	0.631	0
Utp14a	0	-0.752889	0.238	0.532	0
Noc2l	0	-0.829459	0.226	0.513	0
Mnd1	0	-1.59949	0.047	0.231	0
Oat	0	-0.911614	0.16	0.418	0
Sfxn1	0	-0.683208	0.337	0.647	0
Dynlrb1	0	0.700034	0.765	0.779	0
Eif3b	0	-0.707675	0.338	0.646	0
Kdelr2	0	-0.715848	0.339	0.651	0
Thop1	0	-0.807767	0.192	0.471	0
Kdm1a	0	0.592317	0.84	0.861	0
Eri2	0	-1.49232	0.055	0.243	0
Atf1	0	-1.04022	0.107	0.335	0
Nhs	0	-3.43946	0.009	0.151	0
Tubg1	0	-0.697338	0.344	0.655	0
Pask	0	-3.6797	0.008	0.147	0
Dck	0	-0.877713	0.21	0.482	0
Gnb4	0	-1.35317	0.067	0.265	0
Jpt2	0	-1.5797	0.048	0.231	0
4930579G24Rik	0	-1.58701	0.05	0.234	0
Ablim2	0	-3.59693	0.008	0.149	0
Ift80	0	-1.7441	0.046	0.225	0
Ifrd2	0	-1.9775	0.029	0.193	0
Adgrb1	0	-2.81847	0.014	0.162	0
Serinc5	0	-2.05155	0.029	0.192	0
Fat1	0	-1.53951	0.051	0.235	0
Ttyh2	0	2.33197	0.227	0.08	0
Ephb1	0	2.33528	0.251	0.097	0
Gm42418	0	0.256219	0.997	0.999	0
Actn4	0	-0.80662	0.179	0.448	0
Fkbp5	0	-1.18188	0.097	0.313	0
Dleu2	0	-0.801649	0.219	0.5	0
Fzd3	0	1.01189	0.615	0.541	0
Nrxn2	0	1.62748	0.378	0.216	0
Anapc15	0	-0.834302	0.195	0.471	0
Sass6	0	-1.10036	0.117	0.346	0
Galnt2	0	-1.01864	0.127	0.361	0
Thsd7a	0	1.48484	0.483	0.349	0
Nubp1	0	-0.891671	0.159	0.415	0
Kdm6b	0	1.10501	0.573	0.473	0
Rpl27	0	-0.267978	0.973	0.986	0
Rmi2	0	-5.53758	0.002	0.133	0
Alkbh1	0	-0.738875	0.257	0.551	0
Parpbp	0	-4.71184	0.004	0.136	0
Zcwpw1	0	-2.08542	0.031	0.195	0
Vps28	0	1.10071	0.565	0.485	0
Ago2	0	-0.809045	0.182	0.45	0
U2af2	0	-0.615171	0.427	0.742	0
Cchcr1	0	-3.82598	0.005	0.14	0
Abce1	0	-0.735424	0.303	0.606	0
Nup188	0	-1.35498	0.073	0.27	0
Mre11a	0	-1.46805	0.058	0.245	0
2810004N23Rik	0	-0.727898	0.231	0.52	0
Mycbp2	0	0.878225	0.699	0.667	0
Paxx	0	1.7452	0.366	0.212	0
Mical1	0	-2.16695	0.033	0.196	0
Nsl1	0	-5.06338	0.003	0.133	0
Mbd4	0	-1.62053	0.052	0.232	0
Bcl2l12	0	-2.01128	0.03	0.192	0
Eed	0	-0.93812	0.127	0.364	0
Eif4h	0	-0.476982	0.665	0.899	0
Mxra7	0	-1.55058	0.073	0.266	0
Bcl7c	0	-0.561552	0.515	0.811	0
Hnrnpa0	0	-0.29443	0.969	0.99	0
Tead1	0	-0.592544	0.384	0.695	0
Rgs13	0	-1.78458	0.043	0.215	0
Gabbr1	0	1.29836	0.499	0.382	0
Nars	0	-0.711653	0.452	0.733	0
Clip1	0	-1.44793	0.048	0.226	0
Rock2	0	-0.680939	0.28	0.576	0
Tomm20	0	-0.384676	0.868	0.966	0
Tmem64	0	-1.78862	0.039	0.208	0
Tars	0	-0.804713	0.261	0.54	0
Kpnb1	0	-0.663558	0.373	0.686	0
Rpl36al	0	-0.364705	0.889	0.969	0
Gpm6b	0	0.751553	0.752	0.749	0
BC034090	0	-1.48329	0.067	0.255	0
Mxd4	0	1.46389	0.431	0.284	0
Tmcc1	0	1.20882	0.53	0.422	0
Rbm38	0	-1.52759	0.057	0.239	0
Egr1	0	-1.09203	0.218	0.457	0
Nme4	0	-0.988047	0.137	0.373	0
Atp1b3	0	0.816657	0.704	0.666	0
Rasl11a	0	-2.55657	0.019	0.166	0
Naa15	0	-0.651175	0.351	0.659	0
Dimt1	0	-0.835823	0.169	0.428	0
Arf5	0	0.481588	0.899	0.93	0
Ret	0	2.72584	0.175	0.047	0
Pou2f2	0	2.05507	0.29	0.133	0
Nupr1	0	-3.21023	0.015	0.157	0
Cd47	0	1.15598	0.596	0.524	0
Fmr1	0	-0.645201	0.329	0.638	0
Snhg3	0	-1.14684	0.102	0.314	0
Insm2	0	-1.15829	0.118	0.338	0
Sri	0	-0.731217	0.248	0.533	0
Kcnk1	0	1.07328	0.648	0.601	0
Ppfia2	0	1.96233	0.297	0.142	0
Ppp1r1a	0	1.79474	0.345	0.189	0
Zeb1	0	-0.606676	0.512	0.794	0
Cinp	0	-0.850433	0.153	0.401	0
Cnot9	0	-1.16649	0.086	0.292	0
Chpt1	0	-1.31465	0.062	0.248	0
Wdr90	0	-2.42981	0.02	0.168	0
Ankrd10	0	-0.648733	0.301	0.606	0
Syne2	0	-0.628087	0.408	0.709	0
Cars	0	-1.10355	0.109	0.324	0
Clstn1	0	1.13604	0.549	0.458	0
Krcc1	0	-1.39635	0.062	0.248	0
Sdc3	0	1.90342	0.297	0.142	0
Hnrnpc	0	-0.413741	0.783	0.942	0
Lin54	0	-1.64249	0.045	0.218	0
Hspa2	0	-1.03461	0.135	0.366	0
Etaa1	0	-0.893998	0.151	0.396	0
Hdac1	0	-0.731513	0.227	0.509	0
Serping1	0	2.66521	0.179	0.05	0
Rprml	0	-5.82344	0.003	0.129	0
Ddias	0	-2.95884	0.013	0.151	0
Npat	0	-1.23077	0.077	0.275	0
Gins4	0	-0.824759	0.218	0.492	0
Cnrip1	0	1.18353	0.528	0.424	0
Trim27	0	-0.722285	0.27	0.56	0
Hist1h3f	0	-3.73556	0.006	0.136	0
Ndc1	0	-1.40246	0.048	0.222	0
Rrp1b	0	-1.22643	0.078	0.275	0
Eif3i	0	-0.481083	0.711	0.905	0
Zfp521	0	2.03571	0.303	0.152	0
Xpot	0	-1.28291	0.073	0.267	0
Gins3	0	-2.43703	0.019	0.165	0
Kmt5a	0	-0.545374	0.539	0.821	0
Rab34	0	-0.888087	0.139	0.374	0
March1	0	2.13357	0.273	0.123	0
Tmem109	0	-1.22004	0.073	0.267	0
Slc22a17	0	1.02297	0.594	0.516	0
Gpc2	0	1.74332	0.343	0.19	0
Cenpb	0	-0.622361	0.394	0.7	0
Micu3	0	1.4319	0.429	0.287	0
Notch1	0	-4.90529	0.002	0.126	0
Ssx2ip	0	-0.920904	0.15	0.39	0
Uck2	0	-0.863094	0.128	0.36	0
Senp1	0	-0.803569	0.164	0.414	0
Rab14	0	0.618928	0.805	0.817	0
Tm7sf2	0	2.89193	0.168	0.044	0
Gas5	0	-0.516543	0.688	0.9	0
Neurod4	0	-2.62853	0.018	0.161	0
Pwwp3a	0	-0.79354	0.225	0.499	0
Cdc25a	0	-0.987529	0.125	0.351	0
Mrps25	0	-0.691824	0.253	0.546	0
Zfp423	0	1.37106	0.46	0.322	0
Wapl	0	-0.601972	0.39	0.696	0
2810006K23Rik	0	-0.897417	0.134	0.367	0
Hectd2	0	-1.14837	0.091	0.294	0
Aaas	0	-1.45273	0.053	0.229	0
Iars	0	-0.937319	0.155	0.391	0
Pitpnm2	0	-2.37856	0.021	0.167	0
Larp1b	0	-1.37882	0.055	0.232	0
Scand1	0	0.590377	0.822	0.848	0
Ggt7	0	1.94656	0.301	0.149	0
2310011J03Rik	0	-0.932725	0.14	0.376	0
Tpr	0	-0.448286	0.712	0.904	0
Gnaq	0	1.02513	0.59	0.52	0
Sacs	0	-0.693667	0.309	0.596	0
C1galt1	0	-1.592	0.051	0.223	0
Gpc3	0	-6.08872	0.001	0.122	0
Gm4258	0	1.29412	0.489	0.366	0
Tcaf1	0	0.815774	0.698	0.671	0
Snhg15	0	-1.46466	0.06	0.237	0
Ssr1	0	-0.632707	0.355	0.66	0
Hist1h2bb	0	-3.92389	0.004	0.129	0
Auts2	0	0.663228	0.8	0.781	0
Anp32a	0	-0.355038	0.862	0.966	0
Nop16	0	-0.769661	0.214	0.485	0
Tmem47	0	-1.20324	0.089	0.289	0
Dpy30	0	-0.587103	0.494	0.783	0
Tbl1x	0	-0.614979	0.321	0.622	0
Lars	0	-0.657304	0.402	0.689	0
Cenpc1	0	-0.898739	0.177	0.424	0
mt-Co2	0	0.153061	1	0.999	0
mt-Atp6	0	0.148963	1	0.999	0
Ccdc77	0	-1.40298	0.059	0.236	0
Brix1	0	-0.724325	0.258	0.547	0
Ubap2	0	-0.710223	0.241	0.522	0
Bola3	0	-0.861086	0.168	0.414	0
Gtf3a	0	-0.654302	0.341	0.642	0
Prag1	0	-1.47128	0.053	0.225	0
Neurl1b	0	-2.28615	0.023	0.167	0
Pkia	0	1.26524	0.485	0.372	0
Xrcc6	0	-1.2552	0.07	0.256	0
Elf2	0	-0.63922	0.338	0.642	0
Sptan1	0	1.00215	0.613	0.557	0
Nfatc2ip	0	-1.3998	0.056	0.231	0
Chchd3	0	-0.616649	0.33	0.635	0
Sf3a2	0	-0.769536	0.179	0.435	0
Pon2	0	-2.5031	0.019	0.159	0
Hist2h2bb	0	-2.5834	0.016	0.152	0
Bdh1	0	1.51504	0.386	0.24	0
Cdkn2aipnl	0	-0.91516	0.134	0.363	0
Fyn	0	1.02533	0.575	0.495	0
Shisa2	0	-1.34989	0.066	0.245	0
Ninj1	0	-2.0446	0.036	0.19	0
Txnip	0	-1.21653	0.086	0.278	0
Acat1	0	-0.512965	0.613	0.852	0
Chac1	0	-2.96023	0.014	0.147	0
Cerk	0	-1.73295	0.043	0.203	0
Jund	0	0.422352	0.962	0.962	0
Rrp15	0	-0.783799	0.179	0.429	0
Kcng2	0	-3.01266	0.011	0.14	0
Blvrb	0	-1.17404	0.101	0.302	0
Rhno1	0	-0.850179	0.162	0.404	0
Suclg2	0	-3.50139	0.006	0.13	0
Bckdk	0	-0.905805	0.128	0.352	0
Eif1ad	0	-0.643549	0.276	0.568	0
E2f5	0	-1.28898	0.062	0.239	0
Wbp11	0	-0.644476	0.347	0.646	0
Rala	0	0.676903	0.766	0.789	0
Hey1	0	-1.3151	0.089	0.28	0
Ptn	0	0.755522	0.825	0.84	0
Topors	0	-0.698683	0.235	0.507	0
Acadl	0	-0.908641	0.136	0.361	0
Slc1a5	0	-2.53679	0.017	0.152	0
Taf5	0	-0.94738	0.103	0.31	0
Stt3b	0	-0.628186	0.226	0.502	0
Zfp462	0	-0.792222	0.16	0.397	0
Smim11	0	-0.573438	0.431	0.74	0
Tmcc3	0	-1.69838	0.039	0.194	0
Arpc1b	0	-2.10192	0.026	0.169	0
Foxp2	0	-0.874472	0.127	0.342	0
Mtfr2	0	-4.53795	0.003	0.12	0
Tmem59	0	0.68634	0.742	0.745	0
Fancm	0	-0.975897	0.1	0.302	0
Arl4a	0	-1.49531	0.048	0.211	0
Ywhab	0	0.503599	0.873	0.905	0
Atp1a3	0	2.05306	0.242	0.101	0
Pnrc2	0	-0.863417	0.185	0.428	0
Ing2	0	-1.10637	0.086	0.277	0
Asphd2	0	1.01703	0.566	0.483	0
Rusc1	0	1.56606	0.382	0.247	0
Hist1h2bh	0	-4.16095	0.004	0.12	0
Riox2	0	-2.09449	0.024	0.164	0
Adamts20	0	-3.71993	0.006	0.126	0
Tmed5	0	-0.760414	0.159	0.394	0
E2f1	0	-0.604149	0.364	0.656	0
Angpt1	0	-2.75161	0.015	0.146	0
Mamstr	0	-2.76687	0.013	0.141	0
Ppp1r7	0	-0.653557	0.278	0.56	0
Smpd3	0	1.3695	0.442	0.315	0
Rai1	0	-0.855304	0.155	0.384	0
Mcm8	0	-2.37914	0.018	0.152	0
Timm8b	0	0.571517	0.807	0.839	0
L2hgdh	0	-1.44059	0.064	0.236	0
H2afy2	0	0.627938	0.781	0.791	0
Pea15a	0	1.3476	0.451	0.334	0
Shc2	0	-0.909162	0.111	0.317	0
Igsf8	0	0.8128	0.681	0.61	0
Snhg4	0	-0.883645	0.205	0.452	0
Nrf1	0	-0.791461	0.14	0.366	0
Nup35	0	-0.756442	0.182	0.43	0
Mrpl17	0	-0.586804	0.411	0.709	0
Gspt1	0	-0.49372	0.612	0.852	0
Rpl10	0	-0.310786	0.93	0.98	0
Dnajb6	0	0.549398	0.829	0.865	0
Nup205	0	-0.952428	0.108	0.314	0
Spats2l	0	-2.3409	0.019	0.152	0
Cenpx	0	-0.608271	0.358	0.653	0
Pfas	0	-1.61902	0.041	0.195	0
C1ql3	0	-2.94235	0.014	0.14	0
Cavin2	0	-0.937345	0.15	0.362	0
Tinf2	0	-1.43016	0.05	0.213	0
Ccdc86	0	-1.02324	0.084	0.271	0
Hmgxb4	0	-0.745557	0.2	0.453	0
Hmg20b	0	-0.59281	0.338	0.631	0
Sf3b3	0	-0.562245	0.419	0.717	0
Dync1h1	0	0.774477	0.703	0.685	0
Ubl5	0	0.468856	0.886	0.921	0
Hist1h2be	0	-1.92742	0.029	0.171	0
Eif1ax	0	-0.444711	0.671	0.892	0
Kars	0	-0.756944	0.187	0.435	0
Pabpc4	0	-1.08278	0.089	0.28	0
Gabbr2	0	2.54514	0.18	0.057	0
Cers2	0	-0.799207	0.147	0.374	0
Bmpr1a	0	-0.806468	0.129	0.347	0
Ddx20	0	-1.62834	0.034	0.181	0
Cyth2	0	0.64598	0.746	0.748	0
Alms1	0	-1.07054	0.085	0.272	0
Tmed9	0	0.471938	0.894	0.916	0
Chd3	0	1.14198	0.507	0.391	0
Ntn1	0	-1.24969	0.067	0.239	0
Fzr1	0	-0.821553	0.193	0.429	0
Tjp2	0	-3.55512	0.006	0.123	0
Arl6ip1	0	-1.35746	0.77	0.853	0
Gclc	0	-0.990886	0.093	0.284	0
Dcaf1	0	-0.853309	0.151	0.376	0
Poc1b	0	-1.03317	0.09	0.281	0
2700046A07Rik	0	-2.49684	0.019	0.149	0
Haus7	0	-1.03933	0.09	0.281	0
Myc	0	-2.18737	0.024	0.161	0
Isy1	0	-0.779163	0.129	0.346	0
mt-Cytb	0	0.203849	1	0.998	0
Zbtb20	0	0.509105	0.939	0.957	0
Abracl	0	-0.458805	0.728	0.908	0
Mycn	0	-0.636985	0.381	0.657	0
Ccdc58	0	-0.782625	0.171	0.409	0
Klc2	0	2.10675	0.239	0.103	0
Srgap2	0	1.09576	0.541	0.463	0
Slc16a1	0	-1.94841	0.024	0.16	0
Icmt	0	-1.46496	0.043	0.198	0
Polr1a	0	-1.53898	0.046	0.201	0
Aard	0	-1.62841	0.045	0.2	0
Ccl27a	0	1.99278	0.263	0.123	0
Cox6b1	0	0.359877	0.942	0.969	0
Gpn3	0	-0.980309	0.098	0.295	0
Slc17a6	0	1.3225	0.394	0.238	0
Cd2ap	0	-0.602159	0.221	0.482	0
Pdrg1	0	1.10631	0.534	0.453	0
Emd	0	-0.555645	0.359	0.657	0
Xrcc5	0	-0.691854	0.188	0.432	0
Psmg2	0	-0.675191	0.21	0.469	0
Srm	0	-0.70017	0.265	0.532	0
Nup133	0	-0.919443	0.101	0.299	0
Saal1	0	-0.860808	0.127	0.34	0
Ccsap	0	-1.52214	0.04	0.19	0
Znhit3	0	-0.653468	0.234	0.504	0
Uri1	0	-0.730611	0.182	0.423	0
Limd1	0	-1.06232	0.081	0.262	0
Arhgap5	0	-0.522706	0.414	0.707	0
Rab33a	0	1.96486	0.254	0.117	0
Gabpb2	0	-0.921874	0.108	0.307	0
Rasgef1c	0	3.65214	0.107	0.017	0
Fat3	0	-4.65584	0.003	0.113	0
Stoml2	0	-0.538337	0.428	0.724	0
Hist1h2bl	0	-4.42991	0.003	0.114	0
4933404O12Rik	0	-1.97623	0.027	0.164	0
Pcx	0	-1.3552	0.056	0.219	0
Rell1	0	-1.80453	0.032	0.173	0
Stag1	0	-0.561487	0.41	0.698	0
Pank2	0	-0.75851	0.157	0.386	0
Jdp2	0	-2.7831	0.013	0.135	0
Pom121	0	-0.636711	0.217	0.478	0
Nbn	0	-1.75229	0.035	0.178	0
Klhl13	0	-1.29171	0.064	0.232	0
Tbcb	0	0.521241	0.836	0.87	0
Rnf165	0	0.837514	0.647	0.606	0
Mex3b	0	0.976276	0.587	0.522	0
Zmynd19	0	-0.796615	0.193	0.431	0
Cyp39a1	0	-2.48521	0.017	0.142	0
Gmps	0	-0.536532	0.455	0.744	0
Mmp14	0	-1.07712	0.094	0.28	0
Bccip	0	-0.594605	0.344	0.632	0
mt-Co3	0	0.186392	0.999	0.999	0
Rdx	0	-0.402703	0.685	0.898	0
Phf6	0	-0.556093	0.373	0.674	0
Pik3r2	0	1.33268	0.421	0.297	0
Nexn	0	-3.48119	0.007	0.121	0
Grik2	0	1.37712	0.416	0.288	0
Xndc1	0	-1.06913	0.083	0.263	0
Mtbp	0	-2.33296	0.017	0.142	0
Kmt2e	0	0.680912	0.737	0.741	0
BC055324	0	-3.10167	0.01	0.126	0
Larp1	0	-0.592107	0.279	0.556	0
Rbm8a	0	-0.451267	0.628	0.866	0
Ccdc25	0	-0.641493	0.243	0.507	0
Mdm1	0	-0.945305	0.105	0.3	0
Vamp3	0	-0.790097	0.139	0.357	0
Spg20	0	-1.29992	0.061	0.225	0
Zdhhc2	0	-1.61464	0.037	0.182	0
Carmil2	0	1.50542	0.364	0.227	0
Pcbp1	0	-0.360099	0.825	0.95	0
Xrcc2	0	-2.13705	0.021	0.15	0
Hist2h2aa1	0	-2.1422	0.024	0.155	0
Gtpbp4	0	-0.55943	0.423	0.711	0
Brpf1	0	-0.624983	0.221	0.477	0
B4galnt1	0	2.46947	0.172	0.055	0
Ipo11	0	-1.11427	0.072	0.244	0
Nav3	0	1.58742	0.346	0.209	0
Fam241b	0	2.39441	0.183	0.063	0
Ttc39b	0	2.98703	0.135	0.032	0
Lama5	0	-4.34136	0.004	0.111	0
Lamtor4	0	0.785396	0.646	0.628	0
Rnf144a	0	-0.792215	0.122	0.328	0
Smo	0	-0.667296	0.19	0.43	0
Inka2	0	-0.694082	0.21	0.455	0
Snhg12	0	-0.695696	0.216	0.465	0
Plcd1	0	2.49102	0.178	0.06	0
Gas6	0	-3.78495	0.007	0.118	0
Tubgcp3	0	-0.836422	0.127	0.335	0
Mphosph9	0	-0.695434	0.206	0.452	0
Chd1	0	-0.618795	0.263	0.532	0
Fam92a	0	-0.516476	0.434	0.735	0
Phldb1	0	-1.66288	0.035	0.176	0
Poglut2	0	-1.24475	0.059	0.219	0
Uba52	0	-0.539612	0.608	0.839	0
Ddah1	0	-1.81123	0.029	0.164	0
D030056L22Rik	0	-0.58941	0.375	0.659	0
Gid4	0	-0.789544	0.142	0.356	0
C1ql1	0	-0.231643	0.461	0.782	0
Nt5c	0	0.896615	0.587	0.525	0
Eif4e	0	-0.492036	0.514	0.793	0
Tor1aip1	0	-0.844069	0.123	0.328	0
Ppid	0	-0.515724	0.479	0.758	0
Stx4a	0	-1.06327	0.081	0.257	0
Atcay	0	2.48515	0.169	0.054	0
Gucy1b1	0	-1.3385	0.05	0.202	0
Kcnj6	0	1.63141	0.343	0.207	0
Mapre3	0	2.07974	0.213	0.086	0
Gm8797	0	0.301736	0.975	0.976	0
Cep57l1	0	-1.2948	0.058	0.217	0
Nedd4l	0	1.06768	0.529	0.441	0
Gtf3c1	0	-0.670742	0.238	0.494	0
Hist1h3i	0	-3.99357	0.004	0.111	0
Doc2a	0	-2.12062	0.022	0.148	0
Stip1	0	-0.500381	0.48	0.763	0
Cecr2	0	-0.616537	0.275	0.544	0
Arf4	0	0.433644	0.881	0.921	0
Bms1	0	-0.704125	0.176	0.406	0
Rhoq	0	-1.64675	0.036	0.176	0
Syt1	0	1.76977	0.242	0.106	0
Rpn2	0	-0.535442	0.308	0.595	0
Vegfa	0	-1.69305	0.038	0.178	0
Clic1	0	0.664985	0.805	0.836	0
Peg12	0	-3.49877	0.006	0.114	0
Mrpl40	0	-0.689817	0.169	0.4	0
Hddc2	0	-1.14468	0.074	0.242	0
Wrn	0	-1.69101	0.03	0.164	0
Wwc1	0	-1.27565	0.056	0.212	0
Sem1	0	-0.317669	0.896	0.971	0
Naf1	0	-1.65097	0.035	0.173	0
Bmerb1	0	2.27532	0.189	0.069	0
Flot1	0	1.37412	0.394	0.269	0
Oard1	0	-0.62889	0.273	0.542	0
Shisa4	0	1.33546	0.407	0.281	0
Pid1	0	1.90317	0.282	0.145	0
Irx5	0	-1.36045	0.05	0.201	0
Slc12a4	0	-3.3745	0.007	0.116	0
Wdr35	0	-1.13927	0.071	0.238	0
Ntrk2	0	1.85233	0.273	0.138	0
Ctnna1	0	-0.58175	0.215	0.466	0
Ilkap	0	-0.513177	0.448	0.74	0
Lmo1	0	-4.70971	0.004	0.107	0
Bbc3	0	1.74325	0.271	0.136	0
Gpx8	0	-6.58415	0.001	0.1	0
Tafa5	0	-0.882746	0.098	0.283	0
BC030867	0	-5.7594	0.001	0.101	0
Ube2d1	0	0.911776	0.587	0.545	0
2310009B15Rik	0	-0.920122	0.099	0.286	0
Plch2	0	2.76851	0.137	0.035	0
Pmvk	0	1.1866	0.467	0.37	0
Ppp4r3a	0	-0.574942	0.317	0.6	0
Dbr1	0	-1.02561	0.087	0.264	0
Jup	0	2.26891	0.194	0.073	0
Rad51b	0	-3.65517	0.005	0.11	0
Mrps16	0	-0.539523	0.379	0.672	0
Timm17a	0	-0.47502	0.533	0.803	0
Pycr1	0	-1.10743	0.083	0.255	0
Smad3	0	-4.52457	0.002	0.103	0
Gdf10	0	-6.08025	0.001	0.1	0
Rtn3	0	0.534387	0.825	0.855	0
B3glct	0	-1.01297	0.074	0.243	0
Eda2r	0	-2.49451	0.013	0.128	0
Spred1	0	-0.822938	0.126	0.326	0
Abl1	0	-0.827863	0.106	0.295	0
C230057M02Rik	0	-3.0602	0.01	0.12	0
Hax1	0	-0.660862	0.207	0.45	0
Sin3a	0	-0.801174	0.121	0.319	0
Nop10	0	-0.459615	0.588	0.842	0
Mbd3	0	-0.422819	0.655	0.878	0
Tcf7l2	0	-3.94198	0.004	0.107	0
Ctdsp1	0	-2.33447	0.016	0.134	0
Mtch2	0	0.843084	0.652	0.654	0
Sh3kbp1	0	1.16526	0.484	0.387	0
Rtn4r	0	-1.49031	0.039	0.178	0
Pafah1b1	0	0.504064	0.847	0.883	0
St8sia2	0	2.18699	0.199	0.077	0
Phactr4	0	-0.860078	0.105	0.292	0
Rexo2	0	-0.570305	0.386	0.663	0
Rftn2	0	-1.6505	0.042	0.182	0
Fzd1	0	-2.38493	0.016	0.134	0
Cntrob	0	-1.05599	0.078	0.247	0
Me2	0	-0.935988	0.108	0.296	0
Ammecr1	0	-1.16293	0.062	0.22	0
1500009L16Rik	0	-1.26506	0.06	0.216	0
Rragd	0	-0.989392	0.095	0.274	0
Mcee	0	-1.04804	0.087	0.261	0
Hist1h3b	0	-8.79389	0	0.096	0
Ddx18	0	-0.541578	0.251	0.515	0
Cdyl	0	-1.03793	0.071	0.236	0
Prpf40a	0	-0.400004	0.693	0.897	0
Btbd11	0	-3.27575	0.008	0.114	0
Dnmt3a	0	-0.715454	0.134	0.338	0
B3gnt5	0	-1.0392	0.08	0.249	0
Usp10	0	-0.583131	0.275	0.543	0
Prkar2a	0	-0.649569	0.208	0.447	0
Nup160	0	-1.17037	0.062	0.22	0
Taf1	0	-0.576631	0.267	0.528	0
Pradc1	0	-1.03032	0.083	0.255	0
Sdc1	0	-2.5165	0.015	0.13	0
Txndc17	0	0.639487	0.732	0.763	0
Hnrnpm	0	-0.418287	0.654	0.884	0
Plp2	0	-1.4862	0.042	0.182	0
Fanci	0	-4.96548	0.002	0.1	0
Naa40	0	-0.87675	0.098	0.281	0
Prpf38b	0	-0.463919	0.414	0.704	0
Ackr1	0	1.77468	0.274	0.141	0
Bag2	0	-1.1389	0.071	0.233	0
Mast1	0	2.43011	0.163	0.053	0
Haus8	0	-0.956501	0.085	0.259	0
Lrrc7	0	-0.656794	0.202	0.438	0
Gstcd	0	-1.60219	0.033	0.166	0
Trmt10a	0	-1.11247	0.07	0.232	0
Spidr	0	-2.11029	0.02	0.139	0
Pnmal1	0	1.72713	0.276	0.144	0
Pard3b	0	-2.70415	0.012	0.123	0
Larp4	0	-0.586472	0.282	0.55	0
Tram1	0	-0.780611	0.138	0.344	0
Srpr	0	-0.802137	0.132	0.333	0
Cnot10	0	-0.804581	0.137	0.342	0
Psmg4	0	-0.593638	0.324	0.599	0
Rusc2	0	2.68032	0.144	0.041	0
Esf1	0	-0.510052	0.376	0.663	0
Anapc11	0	-0.514355	0.437	0.72	0
Pdxp	0	0.754314	0.668	0.65	0
Nyap2	0	2.44104	0.161	0.052	0
Irak1bp1	0	-0.602601	0.274	0.54	0
Cebpg	0	-0.586482	0.336	0.611	0
Pebp1	0	0.291228	0.972	0.982	0
Scn3a	0	2.85682	0.124	0.029	0
Osgep	0	-0.566167	0.295	0.566	0
Scd2	0	-0.524101	0.312	0.583	0
Vat1	0	1.402	0.379	0.256	0
Slc1a2	0	-0.494558	0.393	0.673	0
Wdr12	0	-0.565993	0.292	0.562	0
Tsen34	0	-0.494836	0.524	0.788	0
Chrac1	0	-0.601811	0.215	0.461	0
Zranb3	0	-2.37669	0.015	0.129	0
Gm15577	0	2.15395	0.2	0.08	0
Eif4b	0	-0.509754	0.365	0.646	0
Nudt4	0	-0.574972	0.297	0.566	0
Akna	0	-3.38833	0.008	0.112	0
H3f3b	0	0.143813	0.999	0.999	0
Tmem238	0	-0.874043	0.116	0.305	0
Prmt1	0	-0.316669	0.862	0.962	0
Atic	0	-0.574377	0.224	0.469	0
Rxra	0	-4.30754	0.003	0.101	0
Hnrnpl	0	-0.431906	0.616	0.858	0
Pnmal2	0	1.38683	0.402	0.287	0
Gcsh	0	-0.561807	0.327	0.6	0
Kif3c	0	1.70196	0.283	0.154	0
Zfp503	0	-1.70081	0.033	0.161	0
Wdr36	0	-0.737106	0.14	0.343	0
Lrrn2	0	-2.8369	0.009	0.114	0
Chchd1	0	-0.400226	0.687	0.895	0
Metrn	0	-1.69459	0.029	0.156	0
Ndrg4	0	2.20305	0.195	0.077	0
Sart3	0	-0.652961	0.185	0.413	0
4930402H24Rik	0	1.36722	0.393	0.277	0
Chmp2a	0	0.639565	0.73	0.75	0
Ube2ql1	0	1.94763	0.272	0.146	0
Ier5l	0	-0.56411	0.314	0.577	0
Zcchc8	0	-0.624141	0.185	0.416	0
Adsl	0	-0.93131	0.094	0.27	0
Miip	0	-1.1817	0.075	0.234	0
Recql4	0	-2.94085	0.01	0.116	0
[truncated: 6,955 more rows]
